# Supplementary material for: Down-Regulation of Insulin Like Growth Factor 1 Involved in Alzheimer's Disease via MAPK, Ras, and FoxO Signaling Pathways
Source: PubMed Central journal article supplement (PMC9096571; doi:10.1155/2022/8169981), 2022-05-04
Supplement: 8169981.f1.pdf [file 8169981.f1.pdf]

## GSE132903

| Samples   | Group | Age | Gender | IGF1     |
|-----------|-------|-----|--------|----------|
| GSM238815 | AD    | 75  | Male   | 2.088222 |
| GSM915119 | AD    | 69  | Male   | 2.529062 |
| GSM238810 | AD    | 81  | Male   | 3.355774 |
| GSM238824 | AD    | 72  | Male   | 4.543965 |
| GSM333287 | AD    | 75  | Male   | 4.587896 |
| GSM333303 | AD    | 90  | Male   | 4.710089 |
| GSM238813 | AD    | 78  | Male   | 4.727213 |
| GSM333300 | AD    | 68  | Male   | 4.769507 |
| GSM238812 | AD    | 75  | Male   | 4.978821 |
| GSM238821 | AD    | 79  | Male   | 5.04476  |
| GSM907825 | AD    | 84  | Male   | 5.081739 |
| GSM907828 | AD    | 88  | Male   | 5.156479 |
| GSM389611 | AD    | 93  | Male   | 5.183066 |
| GSM915113 | AD    | 67  | Male   | 5.194302 |
| GSM333280 | AD    | 88  | Male   | 5.211831 |
| GSM389607 | AD    | 87  | Male   | 5.230779 |
| GSM389610 | AD    | 76  | Male   | 5.247576 |
| GSM389610 | AD    | 98  | Male   | 5.266658 |
| GSM389608 | AD    | 91  | Male   | 5.272564 |
| GSM389611 | AD    | 88  | Male   | 5.276265 |
| GSM389603 | AD    | 80  | Male   | 5.278235 |
| GSM389606 | AD    | 72  | Male   | 5.288972 |
| GSM389606 | AD    | 75  | Male   | 5.292557 |
| GSM389609 | AD    | 82  | Male   | 5.296167 |
| GSM389610 | AD    | 75  | Male   | 5.298546 |
| GSM389607 | AD    | 83  | Male   | 5.305544 |
| GSM389612 | AD    | 73  | Male   | 5.328532 |
| GSM389606 | AD    | 95  | Male   | 5.334588 |
| GSM389606 | AD    | 90  | Male   | 5.335299 |
| GSM915122 | AD    | 78  | Male   | 5.339812 |
| GSM333279 | AD    | 97  | Male   | 5.341187 |
| GSM389609 | AD    | 83  | Male   | 5.344768 |
| GSM389606 | AD    | 87  | Male   | 5.35066  |
| GSM389605 | AD    | 80  | Male   | 5.351872 |
| GSM389604 | AD    | 80  | Male   | 5.35343  |
| GSM333287 | AD    | 69  | Male   | 5.367728 |
| GSM389609 | AD    | 71  | Male   | 5.381176 |
| GSM389608 | AD    | 84  | Male   | 5.392352 |
| GSM389605 | AD    | 92  | Male   | 5.402426 |
| GSM333285 | AD    | 71  | Male   | 5.407012 |
| GSM389609 | AD    | 74  | Male   | 5.425445 |
| GSM389611 | AD    | 84  | Male   | 5.425616 |
| GSM333277 | AD    | 88  | Male   | 5.428426 |
| GSM389610 | AD    | 84  | Male   | 5.429481 |

|                   |     |      |          |
|-------------------|-----|------|----------|
| GSM389609 AD      | 87  | Male | 5.445362 |
| GSM389609 AD      | 85  | Male | 5.45423  |
| GSM333289 AD      | 72  | Male | 5.470067 |
| GSM389606 AD      | 90  | Male | 5.4818   |
| GSM333302 AD      | 89  | Male | 5.482516 |
| GSM389608 AD      | 79  | Male | 5.498655 |
| GSM389605 AD      | 86  | Male | 5.50049  |
| GSM333294 AD      | 76  | Male | 5.503188 |
| GSM389613 AD      | 82  | Male | 5.51958  |
| GSM389607 AD      | 81  | Male | 5.540259 |
| GSM389612 AD      | 89  | Male | 5.540587 |
| GSM238818 AD      | 68  | Male | 5.546245 |
| GSM907833 AD      | 83  | Male | 5.549169 |
| GSM389608 AD      | 86  | Male | 5.549384 |
| GSM333272 AD      | 66  | Male | 5.553387 |
| GSM333284 AD      | 80  | Male | 5.554635 |
| GSM389612 AD      | 88  | Male | 5.55807  |
| GSM333279 AD      | 89  | Male | 5.569688 |
| GSM389607 AD      | 83  | Male | 5.576389 |
| GSM389608 AD      | 88  | Male | 5.578573 |
| GSM389607 AD      | 85  | Male | 5.608072 |
| GSM389604 AD      | 78  | Male | 5.609977 |
| GSM333281 AD      | 86  | Male | 5.637961 |
| GSM389608 AD      | 97  | Male | 5.641984 |
| GSM389612 AD      | 89  | Male | 5.656055 |
| GSM389607 AD      | 94  | Male | 5.68608  |
| GSM333292 AD      | 81  | Male | 5.720371 |
| GSM333295 AD      | 66  | Male | 5.73566  |
| GSM389604 AD      | 81  | Male | 5.739251 |
| GSM389608 AD      | 92  | Male | 5.743714 |
| GSM389608 AD      | 70  | Male | 5.754717 |
| GSM333289 AD      | 105 | Male | 5.79017  |
| GSM389604 AD      | 79  | Male | 5.802818 |
| GSM907832 AD      | 89  | Male | 5.816599 |
| GSM389613 AD      | 82  | Male | 5.821358 |
| GSM915112 AD      | 83  | Male | 5.854882 |
| GSM907834 AD      | 90  | Male | 5.876349 |
| GSM333297 AD      | 79  | Male | 5.88412  |
| GSM915115 AD      | 66  | Male | 5.922412 |
| GSM389613 AD      | 85  | Male | 5.97718  |
| GSM238816 AD      | 87  | Male | 6.003747 |
| GSM238811 AD      | 72  | Male | 6.158009 |
| GSM333290 AD      | 67  | Male | 6.194876 |
| GSM389604 AD      | 76  | Male | 6.250443 |
| GSM238823 AD      | 88  | Male | 6.302871 |
| GSM119645 Control | 79  | Male | 4.747987 |

|                   |     |      |          |
|-------------------|-----|------|----------|
| GSM907846 Control | 80  | Male | 4.997419 |
| GSM333288 Control | 80  | Male | 5.041523 |
| GSM915123 Control | 78  | Male | 5.132132 |
| GSM389595 Control | 82  | Male | 5.196735 |
| GSM333276 Control | 77  | Male | 5.198359 |
| GSM389598 Control | 89  | Male | 5.21044  |
| GSM119651 Control | 69  | Male | 5.226554 |
| GSM907851 Control | 74  | Male | 5.245159 |
| GSM389597 Control | 90  | Male | 5.248542 |
| GSM389614 Control | 76  | Male | 5.261397 |
| GSM389613 Control | 91  | Male | 5.268446 |
| GSM389596 Control | 85  | Male | 5.290109 |
| GSM389598 Control | 84  | Male | 5.30091  |
| GSM333294 Control | 78  | Male | 5.346265 |
| GSM389601 Control | 80  | Male | 5.350949 |
| GSM389614 Control | 90  | Male | 5.353737 |
| GSM389596 Control | 70  | Male | 5.355172 |
| GSM389596 Control | 89  | Male | 5.356386 |
| GSM389598 Control | 92  | Male | 5.36949  |
| GSM389599 Control | 82  | Male | 5.376324 |
| GSM389602 Control | 95  | Male | 5.386559 |
| GSM389596 Control | 77  | Male | 5.390743 |
| GSM389598 Control | 85  | Male | 5.39442  |
| GSM389600 Control | 80  | Male | 5.424277 |
| GSM389599 Control | 73  | Male | 5.439196 |
| GSM333308 Control | 65  | Male | 5.442037 |
| GSM389595 Control | 86  | Male | 5.455844 |
| GSM389597 Control | 83  | Male | 5.456151 |
| GSM389597 Control | 85  | Male | 5.478196 |
| GSM333299 Control | 67  | Male | 5.487295 |
| GSM389600 Control | 74  | Male | 5.491094 |
| GSM389599 Control | 91  | Male | 5.506551 |
| GSM389595 Control | 78  | Male | 5.510566 |
| GSM389600 Control | 86  | Male | 5.51823  |
| GSM389613 Control | 79  | Male | 5.521    |
| GSM333284 Control | 40  | Male | 5.521925 |
| GSM333299 Control | 51  | Male | 5.533259 |
| GSM389601 Control | 92  | Male | 5.556504 |
| GSM389599 Control | 100 | Male | 5.55807  |
| GSM907848 Control | 89  | Male | 5.564179 |
| GSM389599 Control | 75  | Male | 5.599277 |
| GSM389613 Control | 81  | Male | 5.600849 |
| GSM389597 Control | 94  | Male | 5.617434 |
| GSM389614 Control | 81  | Male | 5.619081 |
| GSM389597 Control | 84  | Male | 5.625953 |
| GSM389601 Control | 89  | Male | 5.631671 |

|                   |    |        |          |
|-------------------|----|--------|----------|
| GSM907843 Control | 82 | Male   | 5.657509 |
| GSM333282 Control | 73 | Male   | 5.66287  |
| GSM907842 Control | 89 | Male   | 5.680909 |
| GSM389600 Control | 87 | Male   | 5.705936 |
| GSM389599 Control | 82 | Male   | 5.719809 |
| GSM389595 Control | 91 | Male   | 5.738116 |
| GSM907839 Control | 77 | Male   | 5.745219 |
| GSM389601 Control | 90 | Male   | 5.773462 |
| GSM389598 Control | 88 | Male   | 5.816828 |
| GSM389595 Control | 87 | Male   | 5.823916 |
| GSM389596 Control | 79 | Male   | 5.877588 |
| GSM389614 Control | 83 | Male   | 5.879315 |
| GSM333296 Control | 41 | Male   | 5.884721 |
| GSM389611 Control | 75 | Male   | 5.934081 |
| GSM389600 Control | 76 | Male   | 5.939197 |
| GSM907845 Control | 83 | Male   | 5.941229 |
| GSM333282 Control | 78 | Male   | 5.964473 |
| GSM333275 Control | 81 | Male   | 5.967424 |
| GSM915118 Control | 66 | Male   | 5.978752 |
| GSM389601 Control | 84 | Male   | 5.986249 |
| GSM389601 Control | 80 | Male   | 5.996439 |
| GSM333303 Control | 66 | Male   | 6.032206 |
| GSM907840 Control | 55 | Male   | 6.042739 |
| GSM333281 Control | 95 | Male   | 6.057302 |
| GSM389601 Control | 87 | Male   | 6.113476 |
| GSM389613 Control | 72 | Male   | 6.121825 |
| GSM389601 Control | 71 | Male   | 6.170927 |
| GSM389614 Control | 83 | Male   | 6.186004 |
| GSM915117 Control | 87 | Male   | 6.187262 |
| GSM119647 Control | 79 | Male   | 6.225791 |
| GSM333283 Control | 86 | Male   | 6.258351 |
| GSM915110 Control | 85 | Male   | 6.292442 |
| GSM119641 Control | 85 | Male   | 6.515928 |
| GSM915111 Control | 77 | Male   | 6.648112 |
| GSM119652 Control | 78 | Male   | 6.947981 |
| GSM119642 Control | 80 | Male   | 6.951905 |
| GSM119646 Control | 83 | Male   | 7.209129 |
| GSM119644 Control | 63 | Male   | 7.294782 |
| GSM238809 AD      | 73 | Female | 2.281488 |
| GSM238817 AD      | 90 | Female | 4.083967 |
| GSM238819 AD      | 81 | Female | 4.587107 |
| GSM333298 AD      | 90 | Female | 4.59522  |
| GSM333273 AD      | 72 | Female | 4.779341 |
| GSM915124 AD      | 67 | Female | 4.944092 |
| GSM333290 AD      | 79 | Female | 5.070144 |
| GSM333304 AD      | 63 | Female | 5.084425 |

|              |    |        |          |
|--------------|----|--------|----------|
| GSM238825 AD | 80 | Female | 5.120605 |
| GSM389605 AD | 86 | Female | 5.165991 |
| GSM389606 AD | 88 | Female | 5.183895 |
| GSM389607 AD | 95 | Female | 5.237262 |
| GSM389612 AD | 91 | Female | 5.244036 |
| GSM907826 AD | 88 | Female | 5.244159 |
| GSM389607 AD | 81 | Female | 5.247647 |
| GSM389613 AD | 85 | Female | 5.249325 |
| GSM915114 AD | 88 | Female | 5.265662 |
| GSM389605 AD | 82 | Female | 5.266292 |
| GSM389605 AD | 90 | Female | 5.268314 |
| GSM389608 AD | 95 | Female | 5.278076 |
| GSM389604 AD | 87 | Female | 5.279665 |
| GSM389612 AD | 90 | Female | 5.285296 |
| GSM389610 AD | 77 | Female | 5.295168 |
| GSM389609 AD | 73 | Female | 5.299009 |
| GSM389603 AD | 87 | Female | 5.301971 |
| GSM389605 AD | 92 | Female | 5.303821 |
| GSM389607 AD | 85 | Female | 5.307637 |
| GSM389606 AD | 88 | Female | 5.309045 |
| GSM333299 AD | 83 | Female | 5.311449 |
| GSM389604 AD | 81 | Female | 5.322332 |
| GSM389603 AD | 92 | Female | 5.331337 |
| GSM389603 AD | 77 | Female | 5.344802 |
| GSM389610 AD | 70 | Female | 5.34593  |
| GSM389606 AD | 95 | Female | 5.351191 |
| GSM333288 AD | 96 | Female | 5.360326 |
| GSM333292 AD | 84 | Female | 5.361146 |
| GSM907830 AD | 95 | Female | 5.371029 |
| GSM389604 AD | 91 | Female | 5.385882 |
| GSM389610 AD | 87 | Female | 5.390149 |
| GSM389604 AD | 86 | Female | 5.397069 |
| GSM389611 AD | 87 | Female | 5.401249 |
| GSM333282 AD | 83 | Female | 5.402744 |
| GSM389610 AD | 96 | Female | 5.426692 |
| GSM389612 AD | 97 | Female | 5.428267 |
| GSM907829 AD | 91 | Female | 5.428499 |
| GSM389609 AD | 85 | Female | 5.431017 |
| GSM389610 AD | 78 | Female | 5.4375   |
| GSM389603 AD | 84 | Female | 5.448913 |
| GSM907827 AD | 95 | Female | 5.448959 |
| GSM389609 AD | 78 | Female | 5.456596 |
| GSM389609 AD | 90 | Female | 5.46138  |
| GSM389603 AD | 91 | Female | 5.465248 |
| GSM333307 AD | 98 | Female | 5.473826 |
| GSM389605 AD | 82 | Female | 5.480759 |

|                   |    |        |          |
|-------------------|----|--------|----------|
| GSM238820 AD      | 85 | Female | 5.487421 |
| GSM389611 AD      | 77 | Female | 5.502639 |
| GSM389608 AD      | 82 | Female | 5.506775 |
| GSM389603 AD      | 97 | Female | 5.527215 |
| GSM389606 AD      | 86 | Female | 5.527837 |
| GSM389611 AD      | 75 | Female | 5.537248 |
| GSM389603 AD      | 87 | Female | 5.540804 |
| GSM333305 AD      | 83 | Female | 5.544081 |
| GSM333291 AD      | 87 | Female | 5.564428 |
| GSM389604 AD      | 91 | Female | 5.565806 |
| GSM389605 AD      | 89 | Female | 5.566867 |
| GSM389607 AD      | 85 | Female | 5.568021 |
| GSM333290 AD      | 92 | Female | 5.57408  |
| GSM389610 AD      | 94 | Female | 5.574995 |
| GSM389612 AD      | 78 | Female | 5.575396 |
| GSM333287 AD      | 82 | Female | 5.611226 |
| GSM915121 AD      | 63 | Female | 5.623752 |
| GSM333281 AD      | 85 | Female | 5.661613 |
| GSM333299 AD      | 95 | Female | 5.667416 |
| GSM333268 AD      | 84 | Female | 5.718577 |
| GSM333289 AD      | 81 | Female | 5.719943 |
| GSM389605 AD      | 87 | Female | 5.731082 |
| GSM333294 AD      | 80 | Female | 5.749578 |
| GSM333273 AD      | 93 | Female | 5.805477 |
| GSM333278 AD      | 90 | Female | 5.809771 |
| GSM333293 AD      | 71 | Female | 5.810477 |
| GSM238822 AD      | 82 | Female | 5.859118 |
| GSM907831 AD      | 95 | Female | 5.881529 |
| GSM333281 AD      | 85 | Female | 5.89153  |
| GSM333294 AD      | 79 | Female | 5.927605 |
| GSM333303 AD      | 88 | Female | 5.940106 |
| GSM389612 AD      | 91 | Female | 5.963142 |
| GSM333272 AD      | 96 | Female | 6.147121 |
| GSM333308 Control | 73 | Female | 4.728931 |
| GSM333275 Control | 87 | Female | 5.027353 |
| GSM915120 Control | 81 | Female | 5.161312 |
| GSM333305 Control | 88 | Female | 5.18314  |
| GSM333307 Control | 80 | Female | 5.203212 |
| GSM907853 Control | 54 | Female | 5.244089 |
| GSM389600 Control | 84 | Female | 5.25007  |
| GSM389597 Control | 96 | Female | 5.255134 |
| GSM333270 Control | 92 | Female | 5.302558 |
| GSM389595 Control | 88 | Female | 5.303655 |
| GSM907849 Control | 65 | Female | 5.318409 |
| GSM389602 Control | 95 | Female | 5.321216 |
| GSM389595 Control | 90 | Female | 5.357053 |

|                    |     |        |          |
|--------------------|-----|--------|----------|
| GSM389598: Control | 98  | Female | 5.371884 |
| GSM389602: Control | 86  | Female | 5.389371 |
| GSM907852: Control | 86  | Female | 5.392819 |
| GSM389602: Control | 87  | Female | 5.395708 |
| GSM389595: Control | 87  | Female | 5.398213 |
| GSM907847: Control | 75  | Female | 5.405709 |
| GSM907837: Control | 80  | Female | 5.409919 |
| GSM389597: Control | 73  | Female | 5.419477 |
| GSM907835: Control | 77  | Female | 5.421619 |
| GSM389598: Control | 78  | Female | 5.425858 |
| GSM389596: Control | 95  | Female | 5.43002  |
| GSM389598: Control | 87  | Female | 5.433598 |
| GSM389597: Control | 90  | Female | 5.456332 |
| GSM389596: Control | 88  | Female | 5.464559 |
| GSM389599: Control | 77  | Female | 5.467816 |
| GSM389596: Control | 82  | Female | 5.476838 |
| GSM333280: Control | 91  | Female | 5.48707  |
| GSM389613: Control | 82  | Female | 5.489244 |
| GSM389598: Control | 83  | Female | 5.51254  |
| GSM389596: Control | 102 | Female | 5.517773 |
| GSM389614: Control | 70  | Female | 5.537213 |
| GSM389600: Control | 75  | Female | 5.54259  |
| GSM907836: Control | 87  | Female | 5.549829 |
| GSM907850: Control | 71  | Female | 5.563049 |
| GSM333269: Control | 51  | Female | 5.569764 |
| GSM389597: Control | 85  | Female | 5.571261 |
| GSM389599: Control | 87  | Female | 5.573422 |
| GSM907841: Control | 72  | Female | 5.588709 |
| GSM389611: Control | 77  | Female | 5.601345 |
| GSM389596: Control | 77  | Female | 5.626503 |
| GSM389601: Control | 86  | Female | 5.638664 |
| GSM389599: Control | 90  | Female | 5.651991 |
| GSM389611: Control | 81  | Female | 5.661472 |
| GSM389603: Control | 89  | Female | 5.673416 |
| GSM333301: Control | 43  | Female | 5.67851  |
| GSM389595: Control | 92  | Female | 5.688623 |
| GSM915125: Control | 88  | Female | 5.688682 |
| GSM389597: Control | 87  | Female | 5.693511 |
| GSM389602: Control | 85  | Female | 5.694735 |
| GSM389613: Control | 81  | Female | 5.703345 |
| GSM389600: Control | 91  | Female | 5.715282 |
| GSM389598: Control | 86  | Female | 5.719233 |
| GSM389600: Control | 91  | Female | 5.723455 |
| GSM389601: Control | 80  | Female | 5.728555 |
| GSM907838: Control | 84  | Female | 5.734129 |
| GSM389599: Control | 96  | Female | 5.738733 |

|                   |     |        |          |
|-------------------|-----|--------|----------|
| GSM907844 Control | 78  | Female | 5.739669 |
| GSM389611 Control | 92  | Female | 5.748496 |
| GSM389602 Control | 83  | Female | 5.757999 |
| GSM389603 Control | 91  | Female | 5.81113  |
| GSM333274 Control | 52  | Female | 5.813548 |
| GSM389602 Control | 82  | Female | 5.816285 |
| GSM389600 Control | 94  | Female | 5.902158 |
| GSM389612 Control | 78  | Female | 5.939197 |
| GSM389602 Control | 91  | Female | 6.021094 |
| GSM333269 Control | 82  | Female | 6.025974 |
| GSM389602 Control | 85  | Female | 6.038977 |
| GSM389602 Control | 95  | Female | 6.210436 |
| GSM915116 Control | 79  | Female | 6.566612 |
| GSM119650 Control | 73  | Female | 6.835601 |
| GSM119648 Control | 88  | Female | 7.318032 |
| GSM119643 Control | 102 | Female | 7.612644 |



## GSE5281

| Samples   | Group   | Age | Gender | IGF1     |
|-----------|---------|-----|--------|----------|
| GSM119641 | Control | 85  | Male   | 6.515928 |
| GSM119642 | Control | 80  | Male   | 6.951905 |
| GSM119643 | Control | 102 | Female | 7.612644 |
| GSM119644 | Control | 63  | Male   | 7.294782 |
| GSM119645 | Control | 79  | Male   | 4.747987 |
| GSM119646 | Control | 83  | Male   | 7.209129 |
| GSM119647 | Control | 79  | Male   | 6.225791 |
| GSM119648 | Control | 88  | Female | 7.318032 |
| GSM119650 | Control | 73  | Female | 6.835601 |
| GSM119651 | Control | 69  | Male   | 5.226554 |
| GSM119652 | Control | 78  | Male   | 6.947981 |
| GSM238809 | AD      | 73  | Female | 2.281488 |
| GSM238810 | AD      | 81  | Male   | 3.355774 |
| GSM238811 | AD      | 72  | Male   | 6.158009 |
| GSM238812 | AD      | 75  | Male   | 4.978821 |
| GSM238813 | AD      | 78  | Male   | 4.727213 |
| GSM238815 | AD      | 75  | Male   | 2.088222 |
| GSM238816 | AD      | 87  | Male   | 6.003747 |
| GSM238817 | AD      | 90  | Female | 4.083967 |
| GSM238818 | AD      | 68  | Male   | 5.546245 |
| GSM238819 | AD      | 81  | Female | 4.587107 |
| GSM238820 | AD      | 85  | Female | 5.487421 |
| GSM238821 | AD      | 79  | Male   | 5.04476  |
| GSM238822 | AD      | 82  | Female | 5.859118 |
| GSM238823 | AD      | 88  | Male   | 6.302871 |
| GSM238824 | AD      | 72  | Male   | 4.543965 |
| GSM238825 | AD      | 80  | Female | 5.120605 |

## GSE37264

| Samples   | Group   | Age | Gender | IGF1     |
|-----------|---------|-----|--------|----------|
| GSM915110 | Control | 85  | Male   | 6.292442 |
| GSM915111 | Control | 77  | Male   | 6.648112 |
| GSM915112 | AD      | 83  | Male   | 5.978752 |
| GSM915113 | AD      | 67  | Male   | 2.529062 |
| GSM915114 | AD      | 88  | Female | 5.161312 |
| GSM915115 | AD      | 66  | Male   | 5.623752 |
| GSM915116 | Control | 79  | Female | 5.854882 |
| GSM915117 | Control | 87  | Male   | 5.194302 |
| GSM915118 | Control | 66  | Male   | 5.265662 |
| GSM915119 | AD      | 69  | Male   | 5.339812 |
| GSM915120 | Control | 81  | Female | 5.922412 |
| GSM915121 | AD      | 63  | Female | 5.132132 |
| GSM915122 | AD      | 78  | Male   | 4.944092 |
| GSM915123 | Control | 78  | Male   | 6.566612 |
| GSM915124 | AD      | 67  | Female | 5.688682 |
| GSM915125 | Control | 88  | Female | 6.187262 |
