# Supplementary material for: Down-Regulation of Insulin Like Growth Factor 1 Involved in Alzheimer's Disease via MAPK, Ras, and FoxO Signaling Pathways
Source: PubMed Central journal article supplement (PMC9096571; doi:10.1155/2022/8169981), 2022-05-04
Supplement: 8169981.f2.pdf [file 8169981.f2.pdf]

| Gene.symbc | module | Colc | GS.IGF1    | p.GS.IGF1  | MMgreen    | p.MMgreen  | MMblue     |
|------------|--------|------|------------|------------|------------|------------|------------|
| ZNF385A    | black  |      | -0.3218359 | 7.92E-06   | 0.109599   | 0.13752231 | -0.3351149 |
| TRIM28     | black  |      | -0.3419534 | 1.90E-06   | -0.0194323 | 0.79290385 | -0.3992022 |
| TMEM160    | black  |      | -0.2214295 | 0.00245328 | -0.1221374 | 0.09768222 | -0.5157082 |
| PTPN23     | black  |      | -0.3262208 | 5.85E-06   | -0.0463926 | 0.53061412 | -0.366121  |
| PTMS       | black  |      | -0.275284  | 0.00014918 | -0.1350798 | 0.06676653 | -0.3985998 |
| PRRC2A     | black  |      | -0.3240806 | 6.79E-06   | -0.106067  | 0.15073329 | -0.3168355 |
| PODXL2     | black  |      | -0.2117478 | 0.00381043 | -0.3341715 | 3.34E-06   | -0.3562637 |
| PNPLA2     | black  |      | -0.3193788 | 9.37E-06   | -0.0820789 | 0.26669664 | -0.373827  |
| PLXNB3     | black  |      | -0.1974821 | 0.00705094 | -0.0502861 | 0.49665723 | -0.3726262 |
| PLPPR2     | black  |      | -0.2026039 | 0.00567874 | -0.1620892 | 0.02750284 | -0.4382963 |
| NFIX       | black  |      | -0.3622431 | 4.05E-07   | -0.0838808 | 0.25630338 | -0.1674904 |
| MDK        | black  |      | -0.2471318 | 0.00069554 | 0.06006468 | 0.41669739 | -0.2656544 |
| KMT2A      | black  |      | -0.245366  | 0.00076176 | -0.0241636 | 0.74406086 | -0.5218541 |
| JOSD2      | black  |      | -0.2896927 | 6.34E-05   | -0.0682716 | 0.35580983 | -0.3065513 |
| INO80E     | black  |      | -0.2991463 | 3.53E-05   | -0.0521018 | 0.4812236  | -0.3302633 |
| HCN2       | black  |      | -0.1681722 | 0.02212545 | -0.1435418 | 0.05126524 | -0.4834317 |
| HBA1       | black  |      | -0.2916046 | 5.64E-05   | 0.1641627  | 0.02555615 | -0.2007596 |
| GHDC       | black  |      | -0.2464332 | 0.00072108 | -0.0406589 | 0.58266264 | -0.4568088 |
| EPHX1      | black  |      | -0.4358334 | 5.62E-10   | 0.23802922 | 0.00110385 | -0.1887531 |
| DDN        | black  |      | -0.1725196 | 0.01886181 | -0.1850934 | 0.0116586  | -0.1069413 |
| CST3       | black  |      | -0.3727531 | 1.74E-07   | 0.19235023 | 0.00871454 | -0.3545915 |
| CSNK2B     | black  |      | -0.411129  | 6.13E-09   | -0.0990945 | 0.17959568 | -0.2145337 |
| COPE       | black  |      | -0.2246549 | 0.00210982 | -0.0383088 | 0.60465744 | -0.4861452 |
| CLPTM1     | black  |      | -0.2467429 | 0.00070965 | -0.1277153 | 0.08319465 | -0.3904221 |
| CACNA1A    | black  |      | -0.2337055 | 0.00136644 | -0.2389932 | 0.00105201 | -0.3415404 |
| CA11       | black  |      | -0.222951  | 0.00228539 | -0.2104137 | 0.00404292 | -0.4215128 |
| BSG        | black  |      | -0.3163465 | 1.15E-05   | -0.0137238 | 0.85290961 | -0.370064  |
| BANF1      | black  |      | -0.235248  | 0.00126683 | -0.0070702 | 0.92390636 | -0.5117212 |
| ATP1B2     | black  |      | -0.3937872 | 2.93E-08   | 0.29969202 | 3.41E-05   | -0.3278468 |
| ATN1       | black  |      | -0.3086273 | 1.92E-05   | 0.07408828 | 0.31621921 | -0.3802037 |
| ARPC4      | black  |      | -0.2298592 | 0.00164681 | -0.2591488 | 0.00036809 | -0.3629786 |
| ABCA2      | black  |      | -0.3104208 | 1.71E-05   | -0.0783083 | 0.28936453 | -0.3459015 |
| ZSWIM1     | blue   |      | -0.2637987 | 0.00028539 | -0.0157769 | 0.83121177 | 0.82863729 |
| ZRSR2      | blue   |      | -0.4733744 | 1.01E-11   | 0.22604672 | 0.00197561 | 0.89111682 |
| ZRANB1     | blue   |      | -0.3901698 | 4.02E-08   | 0.19771258 | 0.00698335 | 0.74308535 |
| ZNF827     | blue   |      | -0.4877712 | 1.90E-12   | 0.17456214 | 0.01747847 | 0.87803798 |
| ZNF788     | blue   |      | -0.2754628 | 0.00014765 | 0.39053053 | 3.89E-08   | 0.75190069 |
| ZNF787     | blue   |      | -0.538838  | 2.53E-15   | 0.34224419 | 1.86E-06   | 0.90392719 |
| ZNF786     | blue   |      | -0.4561909 | 6.77E-11   | 0.38926945 | 4.34E-08   | 0.91598022 |
| ZNF771     | blue   |      | -0.4940272 | 8.93E-13   | 0.40034452 | 1.64E-08   | 0.90098233 |
| ZNF766     | blue   |      | -0.2879879 | 7.04E-05   | 0.2735324  | 0.000165   | 0.82241865 |
| ZNF69      | blue   |      | 0.06703485 | 0.36461148 | 0.01449579 | 0.84473697 | 0.02790688 |
| ZNF672     | blue   |      | -0.5403051 | 2.06E-15   | 0.38423841 | 6.68E-08   | 0.88069609 |
| ZNF669     | blue   |      | -0.3350704 | 3.13E-06   | 0.1801385  | 0.01414154 | 0.80251893 |
| ZNF652     | blue   |      | -0.3468202 | 1.32E-06   | 0.36646367 | 2.89E-07   | 0.84927136 |

|         |      |            |            |            |            |            |
|---------|------|------------|------------|------------|------------|------------|
| ZNF598  | blue | -0.3986513 | 1.91E-08   | 0.15298323 | 0.03762222 | 0.82458409 |
| ZNF562  | blue | -0.2946901 | 4.66E-05   | 0.13955727 | 0.05814534 | 0.8864563  |
| ZNF557  | blue | -0.2102558 | 0.00407126 | 0.16663649 | 0.02338941 | 0.74682003 |
| ZNF526  | blue | -0.3929883 | 3.14E-08   | 0.20310576 | 0.00555808 | 0.92090432 |
| ZNF493  | blue | -0.3136024 | 1.38E-05   | 0.16476473 | 0.02501358 | 0.83211587 |
| ZNF483  | blue | 0.1255615  | 0.08856956 | -0.0592592 | 0.42298455 | 0.03339688 |
| ZNF462  | blue | -0.5054037 | 2.18E-13   | 0.4770696  | 6.63E-12   | 0.86344624 |
| ZNF320  | blue | -0.3297731 | 4.56E-06   | 0.1682313  | 0.02207801 | 0.7857548  |
| ZNF223  | blue | -0.3530379 | 8.27E-07   | 0.32403827 | 6.81E-06   | 0.84994374 |
| ZNF184  | blue | 0.52064747 | 3.04E-14   | -0.5363412 | 3.60E-15   | -0.8238557 |
| ZNF160  | blue | -0.5394325 | 2.33E-15   | 0.42036148 | 2.57E-09   | 0.89276557 |
| ZNF148  | blue | -0.4041215 | 1.17E-08   | 0.23980497 | 0.0010101  | 0.81098006 |
| ZNF14   | blue | 0.13532808 | 0.06626258 | 0.01335448 | 0.85682482 | 0.26076092 |
| ZHX3    | blue | -0.4528819 | 9.64E-11   | 0.56052681 | 1.07E-16   | 0.8718307  |
| ZHX2    | blue | -0.233211  | 0.00139986 | 0.46586373 | 2.35E-11   | 0.77684201 |
| ZFP14   | blue | -0.2414901 | 0.00092795 | 0.14314158 | 0.05192425 | 0.72258201 |
| ZDHHC8  | blue | -0.5343141 | 4.77E-15   | 0.40431032 | 1.15E-08   | 0.90846869 |
| ZDHHC1  | blue | -0.2028869 | 0.00561042 | 0.12193596 | 0.09824075 | 0.87791957 |
| ZCWPW1  | blue | -0.2869345 | 7.50E-05   | 0.12541157 | 0.08895381 | 0.80003558 |
| ZCCHC6  | blue | -0.454842  | 7.82E-11   | 0.31552863 | 1.22E-05   | 0.90884567 |
| ZC3H3   | blue | -0.3922446 | 3.35E-08   | 0.17657293 | 0.01620367 | 0.91753466 |
| ZC2HC1C | blue | -0.268126  | 0.00022427 | 0.41361015 | 4.86E-09   | 0.82721724 |
| ZBTB48  | blue | -0.3251691 | 6.30E-06   | 0.08824163 | 0.23231664 | 0.86676974 |
| ZBTB46  | blue | -0.4713119 | 1.28E-11   | 0.33615534 | 2.90E-06   | 0.86324712 |
| ZBTB45  | blue | -0.1342136 | 0.06854925 | 0.12317152 | 0.09485507 | 0.76401468 |
| ZBTB42  | blue | -0.4439177 | 2.47E-10   | 0.46742869 | 1.98E-11   | 0.84883153 |
| XAF1    | blue | -0.5040336 | 2.59E-13   | 0.41906967 | 2.90E-09   | 0.80934003 |
| WWC1    | blue | -0.3967899 | 2.25E-08   | 0.56160141 | 9.09E-17   | 0.81645263 |
| WTIP    | blue | -0.2579967 | 0.00039177 | 0.4331957  | 7.33E-10   | 0.77838514 |
| WHAMM   | blue | -0.403517  | 1.23E-08   | 0.20535437 | 0.00504512 | 0.85310028 |
| WFS1    | blue | -0.4465431 | 1.88E-10   | 0.36621446 | 2.95E-07   | 0.85234205 |
| WDR83OS | blue | -0.3501097 | 1.03E-06   | 0.27638699 | 0.00013996 | 0.90709406 |
| WBP11   | blue | 0.35624935 | 6.46E-07   | -0.29615   | 4.26E-05   | -0.8619369 |
| VGLL4   | blue | -0.3937655 | 2.94E-08   | 0.38907164 | 4.42E-08   | 0.88406929 |
| VEZT    | blue | -0.3417792 | 1.92E-06   | 0.09079448 | 0.2190311  | 0.74639284 |
| VAV2    | blue | -0.3177903 | 1.04E-05   | -0.0271009 | 0.71423047 | 0.8336624  |
| VAMP2   | blue | 0.19518245 | 0.00775785 | -0.4997251 | 4.44E-13   | -0.7871137 |
| USP22   | blue | 0.36423657 | 3.46E-07   | -0.379348  | 1.01E-07   | -0.7788854 |
| UPP1    | blue | -0.2837636 | 9.07E-05   | 0.06744483 | 0.36167906 | 0.78251548 |
| UNC119  | blue | -0.2496061 | 0.00061165 | 0.40483857 | 1.09E-08   | 0.69546931 |
| UGGT1   | blue | -0.3099404 | 1.76E-05   | 0.23349739 | 0.00138041 | 0.73266482 |
| UCP3    | blue | -0.4343037 | 6.56E-10   | 0.25910611 | 0.00036895 | 0.91965025 |
| UBXN2A  | blue | -0.5716838 | 1.91E-17   | 0.51890774 | 3.83E-14   | 0.92170287 |
| UBC     | blue | 0.34100099 | 2.04E-06   | -0.3555601 | 6.81E-07   | -0.7003194 |
| UBA7    | blue | -0.3970975 | 2.19E-08   | 0.44053552 | 3.49E-10   | 0.81341025 |
| U2AF2   | blue | -0.3697248 | 2.23E-07   | 0.4519362  | 1.07E-10   | 0.81663304 |

|           |      |            |            |            |            |            |
|-----------|------|------------|------------|------------|------------|------------|
| TYW3      | blue | -0.2828141 | 9.60E-05   | 0.05148671 | 0.48642238 | 0.79487564 |
| TXLNA     | blue | -0.3893658 | 4.31E-08   | 0.29215514 | 5.46E-05   | 0.95763976 |
| TUSC1     | blue | 0.33723444 | 2.68E-06   | -0.4182936 | 3.13E-09   | -0.8100819 |
| TUG1      | blue | -0.5431413 | 1.38E-15   | 0.44133308 | 3.22E-10   | 0.84338849 |
| TUBA1C    | blue | 0.35706597 | 6.06E-07   | -0.3545751 | 7.35E-07   | -0.9244715 |
| TSSC4     | blue | -0.5116795 | 9.81E-14   | 0.21171008 | 0.00381683 | 0.87729606 |
| TSPAN7    | blue | 0.45214622 | 1.04E-10   | -0.4042002 | 1.16E-08   | -0.8771528 |
| TSPAN4    | blue | -0.4427237 | 2.79E-10   | 0.51447372 | 6.84E-14   | 0.83815634 |
| TSPAN33   | blue | -0.354554  | 7.36E-07   | 0.2899105  | 6.26E-05   | 0.877272   |
| TSPAN31   | blue | -0.3051266 | 2.41E-05   | 0.38859307 | 4.60E-08   | 0.84336788 |
| TRPT1     | blue | -0.3163692 | 1.15E-05   | 0.3492838  | 1.10E-06   | 0.79452135 |
| TRPM4     | blue | -0.323289  | 7.17E-06   | 0.29913123 | 3.53E-05   | 0.76668079 |
| TRIM25    | blue | -0.4415791 | 3.14E-10   | 0.46908736 | 1.64E-11   | 0.75030531 |
| TRAP1     | blue | 0.31233735 | 1.50E-05   | -0.4400684 | 3.66E-10   | -0.7551267 |
| TRAK2     | blue | -0.4444566 | 2.33E-10   | 0.35202182 | 8.93E-07   | 0.75726939 |
| TRAF3IP1  | blue | -0.2356408 | 0.00124255 | 0.00986246 | 0.89400513 | 0.75916816 |
| TRABD     | blue | -0.5382697 | 2.75E-15   | 0.49236173 | 1.09E-12   | 0.94761982 |
| TPPP      | blue | 0.27279169 | 0.00017215 | -0.4310262 | 9.09E-10   | -0.7912012 |
| TPM3      | blue | -0.4590265 | 4.98E-11   | 0.12005556 | 0.10357637 | 0.71136732 |
| TPI1      | blue | 0.20404691 | 0.00533796 | -0.5188875 | 3.84E-14   | -0.6452754 |
| TPCN2     | blue | -0.216883  | 0.00302377 | 0.180433   | 0.01398197 | 0.78727405 |
| TP53I13   | blue | -0.3639343 | 3.54E-07   | 0.40483855 | 1.09E-08   | 0.94403066 |
| TOB2      | blue | -0.5592678 | 1.29E-16   | 0.48784259 | 1.88E-12   | 0.80577917 |
| TNFSF14   | blue | -0.423156  | 1.96E-09   | 0.39178596 | 3.49E-08   | 0.90599104 |
| TNFAIP8L1 | blue | -0.1669508 | 0.02312577 | 0.09154533 | 0.21522861 | 0.57240191 |
| TMX2      | blue | 0.24342825 | 0.00084108 | -0.2145877 | 0.00335516 | -0.594185  |
| TMLHE     | blue | -0.3550099 | 7.11E-07   | 0.51438258 | 6.92E-14   | 0.68824918 |
| TMEM91    | blue | -0.3303036 | 4.40E-06   | 0.16877316 | 0.02164713 | 0.90768874 |
| TMEM79    | blue | -0.4001261 | 1.67E-08   | 0.30534219 | 2.38E-05   | 0.81406255 |
| TMEM38B   | blue | -0.2860596 | 7.90E-05   | 0.26442275 | 0.00027571 | 0.69234847 |
| TMEM267   | blue | -0.307422  | 2.08E-05   | 0.18973835 | 0.00968802 | 0.67127298 |
| TMEM216   | blue | -0.5094174 | 1.31E-13   | 0.61284527 | 1.84E-20   | 0.89543834 |
| TMEM191A  | blue | -0.3985762 | 1.92E-08   | 0.23737383 | 0.00114042 | 0.81107982 |
| TMEM189   | blue | -0.4622241 | 3.51E-11   | 0.42511283 | 1.62E-09   | 0.83869357 |
| TMEM175   | blue | -0.2352374 | 0.00126749 | -0.0565333 | 0.44466722 | 0.77246819 |
| TMEM156   | blue | -0.4233405 | 1.93E-09   | 0.27599727 | 0.00014315 | 0.87675379 |
| TMEM150A  | blue | -0.4709358 | 1.33E-11   | 0.62273421 | 2.97E-21   | 0.84906987 |
| TMEM115   | blue | -0.2927244 | 5.27E-05   | 0.22142352 | 0.00245396 | 0.9034083  |
| TMEM106A  | blue | -0.2290344 | 0.00171339 | 0.20824071 | 0.00444906 | 0.73691    |
| TMED1     | blue | -0.3978982 | 2.04E-08   | 0.51974842 | 3.43E-14   | 0.79484187 |
| TM9SF4    | blue | 0.17641657 | 0.0162998  | -0.3667108 | 2.84E-07   | -0.6822442 |
| TICAM2    | blue | -0.2993539 | 3.48E-05   | 0.45539821 | 7.37E-11   | 0.72585121 |
| TFAP2C    | blue | -0.2588267 | 0.00037458 | 0.61012669 | 3.01E-20   | 0.6875625  |
| TERF2     | blue | 0.18212746 | 0.01309413 | -0.2390388 | 0.00104962 | -0.8506618 |
| TDP1      | blue | 0.07256501 | 0.32629899 | -0.0069368 | 0.92533774 | 0.09913539 |
| TCL1B     | blue | -0.3866592 | 5.44E-08   | 0.28940453 | 6.46E-05   | 0.80813311 |

|          |      |            |            |            |            |            |
|----------|------|------------|------------|------------|------------|------------|
| TCEA1    | blue | -0.4269737 | 1.35E-09   | 0.38221937 | 7.93E-08   | 0.82690662 |
| TCAP     | blue | -0.5056631 | 2.11E-13   | 0.40960986 | 7.06E-09   | 0.80218491 |
| TCAF2    | blue | -0.2383053 | 0.00108877 | 0.26419306 | 0.00027924 | 0.74506159 |
| TBR1     | blue | 0.49816813 | 5.38E-13   | -0.559705  | 1.21E-16   | -0.9022915 |
| TBC1D32  | blue | -0.2635386 | 0.00028952 | 0.14080222 | 0.05591836 | 0.79682111 |
| TAF13    | blue | -0.5612142 | 9.64E-17   | 0.28671625 | 7.60E-05   | 0.79427019 |
| TAF1     | blue | -0.3437619 | 1.66E-06   | 0.23528394 | 0.00126459 | 0.68054634 |
| SYNJ2BP  | blue | -0.5031633 | 2.89E-13   | 0.37827404 | 1.10E-07   | 0.96124584 |
| SYDE2    | blue | -0.3851543 | 6.18E-08   | 0.22608377 | 0.00197214 | 0.84552152 |
| SYAP1    | blue | -0.311682  | 1.57E-05   | 0.28780849 | 7.11E-05   | 0.85536431 |
| SUSD2    | blue | -0.3760593 | 1.33E-07   | 0.40100825 | 1.54E-08   | 0.72567603 |
| SUCLG1   | blue | -0.315248  | 1.24E-05   | 0.05050101 | 0.49481657 | 0.76257471 |
| STRIP2   | blue | -0.3288553 | 4.87E-06   | 0.28768689 | 7.17E-05   | 0.82384111 |
| STK36    | blue | -0.2649141 | 0.0002683  | 0.18011007 | 0.01415703 | 0.820666   |
| STK32B   | blue | -0.2295729 | 0.00166965 | 0.45500829 | 7.68E-11   | 0.69958681 |
| STARDB   | blue | -0.5056555 | 2.11E-13   | 0.4831016  | 3.29E-12   | 0.86792952 |
| SS18     | blue | -0.3266502 | 5.68E-06   | 0.4423877  | 2.89E-10   | 0.76892728 |
| SPOUT1   | blue | -0.5201859 | 3.23E-14   | 0.487013   | 2.07E-12   | 0.88547    |
| SPOP     | blue | -0.5217836 | 2.62E-14   | 0.27395579 | 0.00016104 | 0.80920211 |
| SPNS1    | blue | -0.4343977 | 6.50E-10   | 0.1537908  | 0.036613   | 0.87048366 |
| SPG20    | blue | -0.3427299 | 1.79E-06   | 0.56860288 | 3.10E-17   | 0.74537515 |
| SPECC1L  | blue | -0.4907081 | 1.33E-12   | 0.50123475 | 3.68E-13   | 0.85768456 |
| SPDYE8P  | blue | -0.5510835 | 4.36E-16   | 0.41414313 | 4.63E-09   | 0.79688344 |
| SPCS1    | blue | 0.37676623 | 1.25E-07   | -0.2095682 | 0.00419681 | -0.8658393 |
| SPC24    | blue | -0.4051397 | 1.06E-08   | 0.25451506 | 0.00047217 | 0.93131192 |
| SNX29P2  | blue | -0.3761721 | 1.31E-07   | 0.28334504 | 9.30E-05   | 0.88217626 |
| SNURF    | blue | 0.44328217 | 2.63E-10   | -0.4022143 | 1.39E-08   | -0.8864448 |
| SNTB2    | blue | -0.3382745 | 2.48E-06   | 0.08022109 | 0.27770925 | 0.68914134 |
| SNORD48  | blue | -0.2407269 | 0.00096436 | 0.26816583 | 0.00022376 | 0.28073644 |
| SNORA58  | blue | -0.3143664 | 1.31E-05   | 0.09922176 | 0.17903475 | 0.83048904 |
| SNORA14A | blue | -0.2115005 | 0.0038526  | 0.0554389  | 0.45354599 | 0.81172691 |
| SNHG9    | blue | -0.5059139 | 2.05E-13   | 0.42880606 | 1.13E-09   | 0.83466788 |
| SNAPC1   | blue | -0.242812  | 0.00086785 | 0.20967047 | 0.00417792 | 0.81693176 |
| SMCR5    | blue | -0.2931695 | 5.12E-05   | 0.13300879 | 0.07109329 | 0.82741877 |
| SLC8B1   | blue | -0.5011234 | 3.73E-13   | 0.46329011 | 3.13E-11   | 0.86689652 |
| SLC6A16  | blue | -0.3633285 | 3.71E-07   | 0.36001966 | 4.82E-07   | 0.78471616 |
| SLC5A3   | blue | -0.5333467 | 5.45E-15   | 0.47420273 | 9.21E-12   | 0.76307548 |
| SLC44A2  | blue | -0.5360754 | 3.73E-15   | 0.54791782 | 6.92E-16   | 0.81101388 |
| SLC35E2B | blue | 0.34036213 | 2.13E-06   | -0.2442682 | 0.00080581 | -0.8158127 |
| SLC30A4  | blue | -0.2143902 | 0.00338517 | -0.0397746 | 0.59089559 | 0.80371784 |
| SLC27A3  | blue | -0.2321333 | 0.00147529 | 0.01288355 | 0.8618224  | 0.69846279 |
| SLC26A6  | blue | -0.4322162 | 8.08E-10   | 0.35310441 | 8.23E-07   | 0.85124502 |
| SLC25A39 | blue | -0.5744142 | 1.24E-17   | 0.42559176 | 1.55E-09   | 0.91373997 |
| SLC25A34 | blue | -0.3909856 | 3.74E-08   | 0.24201603 | 0.00090359 | 0.88578165 |
| SLC25A10 | blue | -0.2846547 | 8.60E-05   | 0.07169976 | 0.33211567 | 0.81040322 |
| SLC19A3  | blue | -0.505359  | 2.20E-13   | 0.45183804 | 1.08E-10   | 0.77055871 |

|          |      |            |            |            |            |            |
|----------|------|------------|------------|------------|------------|------------|
| SIX5     | blue | -0.6001338 | 1.75E-19   | 0.53495104 | 4.36E-15   | 0.85904409 |
| SIPA1    | blue | -0.4160624 | 3.86E-09   | 0.57305868 | 1.54E-17   | 0.8765065  |
| SIL1     | blue | -0.2794092 | 0.00011734 | 0.01076218 | 0.88440015 | 0.82277257 |
| SIGLEC6  | blue | -0.360521  | 4.63E-07   | 0.16469314 | 0.02507757 | 0.79582988 |
| SGK3     | blue | -0.4681764 | 1.82E-11   | 0.2879583  | 7.05E-05   | 0.84993241 |
| SGF29    | blue | -0.3279015 | 5.21E-06   | 0.10750967 | 0.14522585 | 0.86431473 |
| SFMBT2   | blue | -0.5368977 | 3.33E-15   | 0.44059532 | 3.47E-10   | 0.93450456 |
| SF3A3    | blue | -0.2014705 | 0.00595993 | 0.00022125 | 0.99761523 | 0.86234762 |
| SETDB2   | blue | -0.1834047 | 0.01245797 | 0.08189714 | 0.26776063 | 0.82780039 |
| SERTAD3  | blue | -0.4146101 | 4.43E-09   | 0.54311956 | 1.38E-15   | 0.81384414 |
| SERBP1   | blue | -0.2221099 | 0.00237686 | 0.30990899 | 1.76E-05   | 0.85182458 |
| SEMA4C   | blue | -0.3359686 | 2.94E-06   | 0.08061692 | 0.27533746 | 0.80474103 |
| SEC61A1  | blue | -0.4866959 | 2.15E-12   | 0.46503781 | 2.58E-11   | 0.87943871 |
| SDHAP1   | blue | -0.4865509 | 2.19E-12   | 0.39705105 | 2.20E-08   | 0.90258001 |
| SDHAF2   | blue | -0.3555093 | 6.84E-07   | 0.08823212 | 0.23236719 | 0.77089397 |
| SCUBE2   | blue | -0.37585   | 1.35E-07   | 0.22632043 | 0.00195015 | 0.84538284 |
| SCRIB    | blue | -0.4932726 | 9.79E-13   | 0.51866285 | 3.95E-14   | 0.9515728  |
| SCN1B    | blue | 0.16496101 | 0.02483884 | -0.3872385 | 5.17E-08   | -0.6916887 |
| SCARNA9  | blue | -0.1937832 | 0.00821818 | 0.15373525 | 0.03668167 | 0.52910359 |
| SCAPER   | blue | -0.1894822 | 0.00978848 | -0.1311081 | 0.07526224 | 0.53433554 |
| SCAP     | blue | -0.4524393 | 1.01E-10   | 0.1699377  | 0.02074558 | 0.83495238 |
| SC5D     | blue | 0.46649188 | 2.19E-11   | -0.3415092 | 1.96E-06   | -0.872784  |
| RRAGD    | blue | -0.2528052 | 0.00051701 | 0.00529567 | 0.94296699 | 0.53523706 |
| RRAGA    | blue | 0.47133274 | 1.28E-11   | -0.4854433 | 2.50E-12   | -0.9335608 |
| RPS6KB2  | blue | -0.4750223 | 8.39E-12   | 0.25576377 | 0.00044173 | 0.90774631 |
| RPPH1    | blue | -0.4909018 | 1.30E-12   | 0.4150394  | 4.25E-09   | 0.82803953 |
| RPN2     | blue | -0.435079  | 6.07E-10   | 0.41808354 | 3.19E-09   | 0.8603895  |
| RPL18A   | blue | -0.3845972 | 6.48E-08   | 0.50528543 | 2.22E-13   | 0.75528557 |
| RPL15    | blue | 0.46869602 | 1.72E-11   | -0.350629  | 9.93E-07   | -0.9003274 |
| RPH3A    | blue | -0.1969403 | 0.00721212 | -0.1564436 | 0.03345734 | 0.22847467 |
| RP9      | blue | -0.2329402 | 0.00141847 | 0.09124546 | 0.21674152 | 0.85170375 |
| RNY4     | blue | -0.3927995 | 3.20E-08   | 0.32031747 | 8.79E-06   | 0.81630396 |
| RNF216   | blue | -0.4145561 | 4.45E-09   | 0.36363118 | 3.63E-07   | 0.92476179 |
| RNF213   | blue | -0.3431103 | 1.74E-06   | 0.24679604 | 0.00070771 | 0.89795083 |
| RN7SK    | blue | -0.6158741 | 1.06E-20   | 0.56372383 | 6.58E-17   | 0.76199825 |
| RINL     | blue | -0.3369095 | 2.74E-06   | 0.33023158 | 4.42E-06   | 0.7762704  |
| RHBDF1   | blue | -0.5726452 | 1.65E-17   | 0.71716938 | 1.63E-30   | 0.78932811 |
| RFX4     | blue | -0.4267082 | 1.39E-09   | 0.2004049  | 0.00623557 | 0.86730001 |
| RER1     | blue | -0.2567406 | 0.00041919 | 0.15517357 | 0.03493805 | 0.7840208  |
| RELL2    | blue | 0.25295563 | 0.00051291 | -0.4183265 | 3.12E-09   | -0.7313731 |
| RDH5     | blue | -0.3649504 | 3.26E-07   | 0.38702159 | 5.27E-08   | 0.76259933 |
| RBM6     | blue | -0.3349785 | 3.15E-06   | 0.2168177  | 0.00303277 | 0.86468211 |
| RAX2     | blue | -0.5003213 | 4.12E-13   | 0.41576266 | 3.97E-09   | 0.93971636 |
| RASSF6   | blue | -0.3194457 | 9.33E-06   | 0.1565433  | 0.03334334 | 0.80458188 |
| RASAL3   | blue | -0.4565615 | 6.50E-11   | 0.49890818 | 4.91E-13   | 0.84242673 |
| RAP1GDS1 | blue | 0.3833844  | 7.18E-08   | -0.4640363 | 2.88E-11   | -0.8682991 |

|           |      |            |            |            |            |            |
|-----------|------|------------|------------|------------|------------|------------|
| RAMP1     | blue | -0.5314843 | 7.05E-15   | 0.56022986 | 1.12E-16   | 0.82364624 |
| RALGPS2   | blue | -0.1834053 | 0.01245768 | 0.07557262 | 0.30659415 | 0.70073179 |
| RAD51     | blue | -0.3268658 | 5.60E-06   | 0.2273936  | 0.00185318 | 0.85070168 |
| RAB2A     | blue | 0.58447975 | 2.45E-18   | -0.6538345 | 6.14E-24   | -0.8026434 |
| RAB11FIP3 | blue | -0.3540316 | 7.66E-07   | 0.18085187 | 0.01375773 | 0.84996658 |
| PXN       | blue | -0.4288645 | 1.13E-09   | 0.47389663 | 9.54E-12   | 0.82342819 |
| PXMP4     | blue | -0.3179092 | 1.04E-05   | 0.17058538 | 0.02025837 | 0.8419122  |
| PTPRD     | blue | -0.1859339 | 0.01127788 | -0.0437017 | 0.55474803 | 0.39116974 |
| PTDSS1    | blue | 0.46122338 | 3.92E-11   | -0.4686396 | 1.73E-11   | -0.8994652 |
| PSMC4     | blue | -0.4492437 | 1.42E-10   | 0.18912803 | 0.0099289  | 0.67083029 |
| PRR14     | blue | -0.4519837 | 1.06E-10   | 0.37070797 | 2.06E-07   | 0.95477644 |
| PROM2     | blue | -0.2606948 | 0.00033841 | 0.17141857 | 0.01964618 | 0.8227744  |
| PRKAR1B   | blue | 0.35976291 | 4.92E-07   | -0.6120055 | 2.14E-20   | -0.7549104 |
| PRDM11    | blue | -0.3253598 | 6.21E-06   | 0.28256099 | 9.74E-05   | 0.62810132 |
| PPP4C     | blue | -0.4726618 | 1.10E-11   | 0.27098396 | 0.00019084 | 0.85387516 |
| PPP2R5C   | blue | -0.4475212 | 1.70E-10   | 0.3112519  | 1.61E-05   | 0.91092461 |
| PPP2R3A   | blue | -0.4563266 | 6.67E-11   | 0.32989586 | 4.52E-06   | 0.89683299 |
| PPP1R16A  | blue | -0.3386238 | 2.42E-06   | 0.5177653  | 4.45E-14   | 0.88731605 |
| PPM1F     | blue | -0.213429  | 0.00353463 | 0.16809848 | 0.02218475 | 0.87623953 |
| PPIAL4G   | blue | -0.2116762 | 0.00382259 | 0.05605283 | 0.44855301 | 0.81954252 |
| PPIAL4A   | blue | 0.36037911 | 4.68E-07   | -0.2654469 | 0.00026048 | -0.9457245 |
| PPFIA1    | blue | -0.5014208 | 3.60E-13   | 0.60791632 | 4.46E-20   | 0.73897479 |
| PPA2      | blue | -0.2461107 | 0.00073315 | 0.27048235 | 0.00019634 | 0.81748921 |
| PP7080    | blue | -0.2535727 | 0.00049642 | 0.17964699 | 0.01441141 | 0.85459782 |
| POTEF     | blue | 0.19648849 | 0.00734901 | -0.4267208 | 1.39E-09   | -0.6291972 |
| POMGNT1   | blue | -0.3708272 | 2.04E-07   | 0.17893184 | 0.01481212 | 0.85016853 |
| POLR1B    | blue | -0.3502754 | 1.02E-06   | 0.10114581 | 0.1707109  | 0.91433122 |
| POGLUT1   | blue | -0.3325867 | 3.74E-06   | 0.05791275 | 0.43361703 | 0.78729949 |
| PLXND1    | blue | -0.3491664 | 1.11E-06   | 0.24154759 | 0.00092526 | 0.84651114 |
| PLSCR3    | blue | -0.3769346 | 1.23E-07   | 0.3971137  | 2.19E-08   | 0.76933247 |
| PLOD1     | blue | -0.4765902 | 7.01E-12   | 0.5398286  | 2.20E-15   | 0.89062201 |
| PLIN5     | blue | -0.2750461 | 0.00015124 | 0.22727304 | 0.00186385 | 0.71753638 |
| PLEKHO1   | blue | -0.3918797 | 3.46E-08   | 0.2664652  | 0.00024612 | 0.89286522 |
| PLEKHH3   | blue | -0.4710606 | 1.32E-11   | 0.36979685 | 2.21E-07   | 0.88863171 |
| PLA2G2D   | blue | -0.3662336 | 2.95E-07   | 0.30384345 | 2.62E-05   | 0.88716884 |
| PKNOX1    | blue | -0.241531  | 0.00092603 | 0.22318789 | 0.00226021 | 0.81697867 |
| PKDCC     | blue | -0.2156046 | 0.00320451 | -0.1304865 | 0.07666785 | 0.65525547 |
| PITRM1    | blue | 0.33045166 | 4.35E-06   | -0.3501906 | 1.03E-06   | -0.735579  |
| PISD      | blue | 0.37827555 | 1.10E-07   | -0.632517  | 4.58E-22   | -0.7770949 |
| PIP4K2B   | blue | 0.41494256 | 4.29E-09   | -0.4056346 | 1.02E-08   | -0.6565519 |
| PIK3R2    | blue | -0.1762957 | 0.01637444 | 0.20040027 | 0.00623679 | 0.71222726 |
| PIGX      | blue | -0.2653795 | 0.00026146 | 0.20145637 | 0.00596351 | 0.82002254 |
| PIGU      | blue | -0.3175875 | 1.06E-05   | 0.08702288 | 0.23885541 | 0.87007337 |
| PIGQ      | blue | -0.3594468 | 5.04E-07   | 0.1082523  | 0.14245103 | 0.83507547 |
| PICK1     | blue | -0.2416115 | 0.00092227 | 0.0143836  | 0.84592368 | 0.79268525 |
| PIAS4     | blue | -0.5530422 | 3.27E-16   | 0.37370496 | 1.61E-07   | 0.86931864 |

|            |      |            |            |            |            |            |
|------------|------|------------|------------|------------|------------|------------|
| PI4KB      | blue | -0.2754731 | 0.00014756 | -0.0035064 | 0.96221854 | 0.86642671 |
| PI4KAP2    | blue | 0.37372281 | 1.61E-07   | -0.5008382 | 3.87E-13   | -0.876632  |
| PI4KAP1    | blue | 0.29815817 | 3.76E-05   | -0.4838899 | 3.00E-12   | -0.8110142 |
| PHF21A     | blue | -0.5841895 | 2.57E-18   | 0.65829657 | 2.38E-24   | 0.84641629 |
| PGAM4      | blue | 0.40327274 | 1.26E-08   | -0.300095  | 3.32E-05   | -0.9130772 |
| PGAM1      | blue | 0.3233357  | 7.15E-06   | -0.2678014 | 0.00022839 | -0.9216243 |
| PFDN1      | blue | 0.16010092 | 0.02948726 | -0.3034479 | 2.68E-05   | -0.8207413 |
| PEX11B     | blue | 0.46677747 | 2.13E-11   | -0.6674963 | 3.21E-25   | -0.874123  |
| PDE9A      | blue | -0.5417197 | 1.69E-15   | 0.4174232  | 3.40E-09   | 0.88624821 |
| PDCD4      | blue | -0.4402809 | 3.58E-10   | 0.35447768 | 7.40E-07   | 0.91541863 |
| PCYT2      | blue | -0.1389843 | 0.05919451 | -0.1402243 | 0.05694318 | 0.75587599 |
| PCYOX1     | blue | -0.2575427 | 0.00040148 | 0.10981996 | 0.13672625 | 0.75656465 |
| PCSK4      | blue | -0.387964  | 4.86E-08   | 0.07259095 | 0.32612558 | 0.84872317 |
| PCDHB9     | blue | -0.2707232 | 0.00019368 | 0.1968786  | 0.00723067 | 0.84253243 |
| PCDHB19P   | blue | -0.3531142 | 8.22E-07   | 0.20768184 | 0.00455927 | 0.9180441  |
| PCDHA1     | blue | -0.2289678 | 0.00171887 | 0.05087632 | 0.49161146 | 0.79853026 |
| PCDH7      | blue | 0.17127801 | 0.01974832 | -0.393728  | 2.95E-08   | -0.8117574 |
| PBX2       | blue | -0.2311723 | 0.00154568 | -0.0057876 | 0.93767963 | 0.80637932 |
| PBX1       | blue | -0.3368049 | 2.76E-06   | -0.0136668 | 0.85351393 | 0.67478003 |
| PAXIP1-AS1 | blue | -0.3732338 | 1.67E-07   | 0.27208543 | 0.00017924 | 0.79665681 |
| PATE2      | blue | -0.2856017 | 8.13E-05   | 0.22821465 | 0.00178198 | 0.8337034  |
| PARP10     | blue | -0.4483696 | 1.55E-10   | 0.36819098 | 2.52E-07   | 0.95033904 |
| PAMR1      | blue | -0.3493335 | 1.10E-06   | 0.31461717 | 1.29E-05   | 0.56221464 |
| PAGR1      | blue | -0.4462951 | 1.93E-10   | 0.61782803 | 7.40E-21   | 0.77825886 |
| P3H4       | blue | -0.3335585 | 3.49E-06   | 0.1172031  | 0.11210322 | 0.84495348 |
| P3H2       | blue | -0.3799971 | 9.56E-08   | 0.46570256 | 2.39E-11   | 0.84397958 |
| P2RY11     | blue | -0.4212146 | 2.37E-09   | 0.22855272 | 0.00175339 | 0.88196633 |
| P2RY1      | blue | -0.1888488 | 0.01004085 | 0.35435003 | 7.48E-07   | 0.76922508 |
| P2RX6      | blue | -0.1701393 | 0.02059287 | -0.1739985 | 0.01785111 | 0.626149   |
| OSBPL8     | blue | -0.29172   | 5.60E-05   | 0.08956192 | 0.22537643 | 0.56337469 |
| OSBPL2     | blue | -0.5089837 | 1.39E-13   | 0.51854534 | 4.01E-14   | 0.89418587 |
| ORAOV1     | blue | -0.1527099 | 0.03796908 | -0.0252327 | 0.73315626 | 0.80229331 |
| OPA3       | blue | -0.40948   | 7.14E-09   | 0.23849275 | 0.00107864 | 0.90714715 |
| NUBPL      | blue | -0.2644347 | 0.00027553 | 0.26950463 | 0.00020751 | 0.77897475 |
| NT5C       | blue | -0.3229641 | 7.33E-06   | 0.28889248 | 6.66E-05   | 0.72210012 |
| NR1H3      | blue | -0.4204128 | 2.56E-09   | 0.36633835 | 2.92E-07   | 0.91647158 |
| NPRL3      | blue | -0.23109   | 0.00155185 | 0.17037093 | 0.02041858 | 0.81475763 |
| NOTCH1     | blue | -0.4669454 | 2.09E-11   | 0.65279957 | 7.63E-24   | 0.88403631 |
| NOS1AP     | blue | -0.1918517 | 0.00889336 | -0.1616505 | 0.02793057 | 0.73265824 |
| NOP14      | blue | -0.3892635 | 4.35E-08   | 0.20898965 | 0.00430512 | 0.91604031 |
| NOL8       | blue | -0.4660718 | 2.30E-11   | 0.39637788 | 2.33E-08   | 0.87782192 |
| NME1       | blue | 0.5160912  | 5.54E-14   | -0.6613458 | 1.23E-24   | -0.8485406 |
| NHP2       | blue | 0.23523747 | 0.00126748 | -0.230657  | 0.00158467 | -0.8460417 |
| NFATC2IP   | blue | -0.3597842 | 4.91E-07   | 0.08466491 | 0.25186936 | 0.85942246 |
| NENF       | blue | -0.3262176 | 5.86E-06   | 0.27770357 | 0.00012965 | 0.85165984 |
| NEK8       | blue | -0.2881525 | 6.97E-05   | 0.09330409 | 0.20650698 | 0.89672332 |

|           |      |            |            |            |            |            |
|-----------|------|------------|------------|------------|------------|------------|
| NEK6      | blue | -0.5051374 | 2.26E-13   | 0.42954455 | 1.05E-09   | 0.82244237 |
| NDUFV2    | blue | 0.41595693 | 3.90E-09   | -0.5188466 | 3.86E-14   | -0.820983  |
| NDUFV1    | blue | 0.11616579 | 0.11533677 | -0.5441777 | 1.19E-15   | -0.6999049 |
| NCAM1     | blue | -0.3388969 | 2.37E-06   | 0.02926101 | 0.6925625  | 0.60422241 |
| NAT9      | blue | -0.3475154 | 1.26E-06   | 0.22338699 | 0.00223925 | 0.84544904 |
| MYL12B    | blue | 0.43877683 | 4.18E-10   | -0.445456  | 2.10E-10   | -0.886107  |
| MXD4      | blue | -0.588087  | 1.35E-18   | 0.51931844 | 3.63E-14   | 0.88670892 |
| MUC1      | blue | -0.4873715 | 1.99E-12   | 0.44961386 | 1.36E-10   | 0.80058684 |
| MTFP1     | blue | -0.4397898 | 3.77E-10   | 0.29648178 | 4.17E-05   | 0.80985378 |
| MTERF1    | blue | -0.3325273 | 3.76E-06   | 0.19271874 | 0.00858442 | 0.81587576 |
| MST1      | blue | -0.3303593 | 4.38E-06   | 0.18932372 | 0.0098511  | 0.86073943 |
| MSRB2     | blue | -0.4679379 | 1.87E-11   | 0.3654804  | 3.13E-07   | 0.84766512 |
| MSL3      | blue | -0.4886791 | 1.70E-12   | 0.16173109 | 0.02785156 | 0.83934792 |
| MRPL35    | blue | -0.3661992 | 2.96E-07   | 0.15124428 | 0.03987529 | 0.71675964 |
| MRGBP     | blue | -0.3251055 | 6.33E-06   | 0.13453513 | 0.06788306 | 0.85732064 |
| MOB3C     | blue | -0.5593783 | 1.27E-16   | 0.57127572 | 2.04E-17   | 0.89797204 |
| MLXIPL    | blue | -0.3719589 | 1.86E-07   | 0.06047026 | 0.41355232 | 0.83359098 |
| MLLT6     | blue | -0.6139849 | 1.50E-20   | 0.54400913 | 1.22E-15   | 0.82262801 |
| MKNK2     | blue | -0.6344131 | 3.17E-22   | 0.56211975 | 8.40E-17   | 0.76846948 |
| MIR2116   | blue | -0.2518778 | 0.00054295 | 0.19417955 | 0.00808538 | 0.85885731 |
| MICB      | blue | -0.2762557 | 0.00014103 | 0.27251202 | 0.00017493 | 0.70407409 |
| MFSD10    | blue | -0.4474091 | 1.72E-10   | 0.29672791 | 4.11E-05   | 0.91491403 |
| METTL2B   | blue | -0.2537848 | 0.00049086 | 0.06106029 | 0.40900187 | 0.8449613  |
| MDM2      | blue | -0.2640042 | 0.00028217 | 0.13603993 | 0.06483487 | 0.55071379 |
| MBOAT2    | blue | -0.3165043 | 1.14E-05   | 0.45631117 | 6.68E-11   | 0.66506724 |
| MAX       | blue | -0.4444559 | 2.33E-10   | 0.28690043 | 7.51E-05   | 0.7632317  |
| MATK      | blue | -0.2046243 | 0.00520682 | 0.01970108 | 0.79010576 | 0.77465113 |
| MAPKAPK3  | blue | -0.5111217 | 1.05E-13   | 0.50715607 | 1.75E-13   | 0.83668254 |
| MAP3K6    | blue | -0.5752839 | 1.08E-17   | 0.43838501 | 4.35E-10   | 0.84998789 |
| MAP2K3    | blue | -0.2646682 | 0.00027199 | 0.25463512 | 0.00046916 | 0.87224658 |
| MAP1B     | blue | 0.46192111 | 3.63E-11   | -0.4385366 | 4.28E-10   | -0.8084992 |
| MAGT1     | blue | 0.10643293 | 0.14932173 | -0.1139127 | 0.12261044 | 0.21762056 |
| MAGED1    | blue | 0.57900985 | 5.97E-18   | -0.5836849 | 2.79E-18   | -0.8540645 |
| MAEA      | blue | 0.40887685 | 7.55E-09   | -0.3600051 | 4.82E-07   | -0.9001648 |
| LZIC      | blue | -0.2990529 | 3.55E-05   | 0.38260066 | 7.68E-08   | 0.74976246 |
| LYL1      | blue | -0.4498722 | 1.33E-10   | 0.4870207  | 2.07E-12   | 0.86810213 |
| LSM14B    | blue | -0.1364635 | 0.06399737 | -0.0457809 | 0.53605385 | 0.51936867 |
| LSM14A    | blue | -0.4008226 | 1.57E-08   | 0.42115695 | 2.38E-09   | 0.77077497 |
| LSM11     | blue | -0.5089465 | 1.39E-13   | 0.2644294  | 0.00027561 | 0.81759392 |
| LSAMP     | blue | -0.284831  | 8.51E-05   | 0.09482385 | 0.19917798 | 0.50259237 |
| LRRFIP1   | blue | 0.0530816  | 0.47300367 | -0.0521378 | 0.48091959 | 0.02688961 |
| LRRC14    | blue | -0.4138982 | 4.74E-09   | 0.41081806 | 6.31E-09   | 0.87157587 |
| LRP5      | blue | -0.5190618 | 3.75E-14   | 0.602481   | 1.16E-19   | 0.87290734 |
| LRP3      | blue | -0.32352   | 7.06E-06   | 0.19994819 | 0.00635715 | 0.85482903 |
| LRCH4     | blue | -0.5758341 | 9.93E-18   | 0.55847044 | 1.46E-16   | 0.82379268 |
| LOC441455 | blue | -0.3505116 | 1.00E-06   | 0.03616277 | 0.62505912 | 0.70854197 |



|            |      |            |            |            |            |            |
|------------|------|------------|------------|------------|------------|------------|
| LOC148413  | blue | -0.187914  | 0.01042381 | 0.05928758 | 0.42276233 | 0.65650864 |
| LOC1001302 | blue | -0.3053026 | 2.38E-05   | 0.36869995 | 2.42E-07   | 0.76271886 |
| LMNB2      | blue | -0.3340531 | 3.37E-06   | 0.22941451 | 0.00168241 | 0.8430919  |
| LLPH       | blue | -0.4998148 | 4.39E-13   | 0.36655747 | 2.87E-07   | 0.94543306 |
| LINC01567  | blue | -0.424427  | 1.74E-09   | 0.18262186 | 0.01284458 | 0.80529391 |
| LINC00997  | blue | -0.233986  | 0.00134781 | 0.22714244 | 0.00187547 | 0.8764259  |
| LINC00294  | blue | 0.3979127  | 2.04E-08   | -0.2939454 | 4.88E-05   | -0.8633653 |
| LIMS2      | blue | -0.3997246 | 1.73E-08   | 0.27021675 | 0.00019932 | 0.81920735 |
| LILRB1     | blue | -0.4445564 | 2.31E-10   | 0.36131767 | 4.35E-07   | 0.88446694 |
| LETMD1     | blue | 0.55158315 | 4.06E-16   | -0.5089044 | 1.40E-13   | -0.8568612 |
| LEMD2      | blue | -0.2482269 | 0.00065718 | 0.21419332 | 0.00341531 | 0.87543946 |
| LDOC1      | blue | 0.17974683 | 0.01435623 | -0.381032  | 8.76E-08   | -0.8728875 |
| LCAT       | blue | -0.4303888 | 9.68E-10   | 0.36366389 | 3.62E-07   | 0.8589801  |
| LAT        | blue | -0.2434374 | 0.00084069 | 0.00176877 | 0.98093645 | 0.8137809  |
| LAS1L      | blue | -0.3671103 | 2.75E-07   | 0.03526348 | 0.63369502 | 0.80268005 |
| KRTCAP2    | blue | -0.5008838 | 3.84E-13   | 0.31672346 | 1.12E-05   | 0.85768938 |
| KLHL8      | blue | -0.2797967 | 0.0001147  | 0.04834143 | 0.51347254 | 0.87234438 |
| KIAA0408   | blue | 0.18439624 | 0.01198299 | -0.247746  | 0.00067378 | 0.16163538 |
| KDM6A      | blue | -0.1955006 | 0.00765643 | 0.19835337 | 0.00679848 | 0.54681034 |
| KCTD7      | blue | -0.3902015 | 4.01E-08   | 0.1529136  | 0.03771033 | 0.83572902 |
| KCTD5      | blue | -0.5102616 | 1.18E-13   | 0.37744884 | 1.18E-07   | 0.84084508 |
| KCTD11     | blue | -0.4277261 | 1.26E-09   | 0.42898591 | 1.11E-09   | 0.8281098  |
| KCNMA1     | blue | -0.4411205 | 3.29E-10   | 0.56979126 | 2.58E-17   | 0.80985429 |
| KCNK12     | blue | -0.4664882 | 2.19E-11   | 0.39204361 | 3.41E-08   | 0.82173964 |
| KCNC2      | blue | 0.4419784  | 3.01E-10   | -0.5541756 | 2.77E-16   | -0.8321868 |
| KAT8       | blue | -0.3232793 | 7.18E-06   | 0.0829949  | 0.26137787 | 0.72744955 |
| KAT2A      | blue | -0.3322529 | 3.83E-06   | 0.19084496 | 0.00926441 | 0.77070715 |
| JAKMIP3    | blue | -0.3854748 | 6.01E-08   | 0.12538909 | 0.08901155 | 0.83795114 |
| JAG1       | blue | -0.3257517 | 6.05E-06   | 0.42296135 | 2.00E-09   | 0.73156821 |
| ITSN1      | blue | -0.5485647 | 6.30E-16   | 0.69500396 | 5.10E-28   | 0.85675468 |
| ITPR3      | blue | -0.5320564 | 6.51E-15   | 0.62425859 | 2.23E-21   | 0.79862744 |
| IRAK1BP1   | blue | -0.254334  | 0.00047674 | 0.15223362 | 0.03857992 | 0.54909379 |
| IP6K1      | blue | -0.2230307 | 0.0022769  | -0.0498956 | 0.50000963 | 0.76230861 |
| INTS9      | blue | -0.3477638 | 1.23E-06   | 0.30025569 | 3.29E-05   | 0.89120283 |
| INTS1      | blue | -0.3363625 | 2.85E-06   | 0.05944811 | 0.42150527 | 0.884493   |
| INIP       | blue | -0.4114315 | 5.96E-09   | 0.34564079 | 1.44E-06   | 0.81493524 |
| ILVBL      | blue | -0.3570094 | 6.09E-07   | 0.21468073 | 0.00334113 | 0.86030346 |
| ILF2       | blue | 0.24987765 | 0.00060303 | 0.0661699  | 0.37084637 | -0.7976771 |
| IL10       | blue | -0.3616721 | 4.23E-07   | 0.31061168 | 1.68E-05   | 0.81700373 |
| IKZF4      | blue | -0.3315403 | 4.03E-06   | 0.0713384  | 0.33456455 | 0.76871582 |
| IKZF2      | blue | -0.326883  | 5.59E-06   | 0.20270624 | 0.00565395 | 0.87102867 |
| IGDCC3     | blue | -0.4799933 | 4.73E-12   | 0.27198036 | 0.00018032 | 0.9050037  |
| IFT122     | blue | -0.2426428 | 0.00087534 | 0.01348037 | 0.85548983 | 0.84318291 |
| IFNAR2     | blue | -0.4948514 | 8.08E-13   | 0.33100709 | 4.18E-06   | 0.89287284 |
| IBA57      | blue | -0.4365578 | 5.23E-10   | 0.18746484 | 0.01061239 | 0.83437085 |
| HYAL1      | blue | -0.4729465 | 1.06E-11   | 0.49758533 | 5.78E-13   | 0.78414175 |

|           |      |            |            |            |            |            |
|-----------|------|------------|------------|------------|------------|------------|
| HTATSFP2  | blue | -0.4312896 | 8.86E-10   | 0.18623895 | 0.01114241 | 0.75783626 |
| HSCB      | blue | -0.2955495 | 4.42E-05   | 0.34021589 | 2.16E-06   | 0.87770156 |
| HNRNPU    | blue | 0.11044995 | 0.1344759  | -0.0620376 | 0.4015301  | 0.06588005 |
| HMG5      | blue | -0.364437  | 3.40E-07   | 0.60276279 | 1.11E-19   | 0.75598761 |
| HEY2      | blue | -0.5022304 | 3.25E-13   | 0.65633006 | 3.62E-24   | 0.78777297 |
| HES6      | blue | -0.3150711 | 1.25E-05   | 0.50756792 | 1.66E-13   | 0.71469983 |
| HERC1     | blue | 0.46798336 | 1.86E-11   | -0.5615674 | 9.13E-17   | -0.8841301 |
| HEPH      | blue | -0.4473748 | 1.72E-10   | 0.60347306 | 9.78E-20   | 0.80175387 |
| HCG4      | blue | -0.4570073 | 6.20E-11   | 0.38992936 | 4.10E-08   | 0.79845136 |
| HAUS2     | blue | -0.4447531 | 2.26E-10   | 0.36333376 | 3.71E-07   | 0.89057897 |
| HACD4     | blue | -0.2827657 | 9.63E-05   | 0.29107556 | 5.83E-05   | 0.8013411  |
| GSTTP2    | blue | -0.2352672 | 0.00126563 | 0.17075737 | 0.02013066 | 0.75517147 |
| GSK3B     | blue | -0.3560914 | 6.54E-07   | -0.0335082 | 0.65069347 | 0.65743504 |
| GSDMD     | blue | -0.5566269 | 1.92E-16   | 0.59441984 | 4.67E-19   | 0.86628466 |
| GSDMB     | blue | -0.3557036 | 6.74E-07   | 0.28244831 | 9.81E-05   | 0.76925853 |
| GRK2      | blue | -0.2900959 | 6.19E-05   | 0.17469986 | 0.01738846 | 0.85329389 |
| GRAP      | blue | -0.4980849 | 5.44E-13   | 0.48285739 | 3.39E-12   | 0.79244548 |
| GRAMD1A   | blue | -0.3717798 | 1.88E-07   | 0.33900758 | 2.36E-06   | 0.83720192 |
| GPX8      | blue | -0.3791846 | 1.02E-07   | 0.23218735 | 0.00147142 | 0.90214742 |
| GPT       | blue | -0.3683206 | 2.49E-07   | 0.31033798 | 1.72E-05   | 0.88904272 |
| GPS1      | blue | -0.2497224 | 0.00060795 | -0.0850189 | 0.24988502 | 0.75914186 |
| GPRC5C    | blue | -0.3326797 | 3.71E-06   | 0.50271451 | 3.06E-13   | 0.83919851 |
| GOLGA6L6  | blue | -0.3459244 | 1.41E-06   | 0.32826505 | 5.07E-06   | 0.88000423 |
| GNL3L     | blue | -0.4993761 | 4.63E-13   | 0.22961601 | 0.00166619 | 0.832423   |
| GNAS      | blue | 0.32590389 | 5.98E-06   | -0.1460334 | 0.0473169  | -0.8706023 |
| GMEB2     | blue | -0.225764  | 0.00200223 | 0.12743351 | 0.08388257 | 0.85078734 |
| GLO1      | blue | 0.32370599 | 6.97E-06   | -0.2045779 | 0.00521723 | -0.8495272 |
| GLIS3     | blue | -0.4538822 | 8.66E-11   | 0.64709168 | 2.49E-23   | 0.75026359 |
| GGA3      | blue | -0.297828  | 3.83E-05   | 0.06397846 | 0.38693463 | 0.63026186 |
| GGA2      | blue | -0.2585957 | 0.00037929 | 0.22014997 | 0.00260305 | 0.86762931 |
| GCN1      | blue | -0.4631791 | 3.16E-11   | 0.44920947 | 1.42E-10   | 0.80114221 |
| GCLM      | blue | -0.1781823 | 0.01524252 | 0.03842797 | 0.60353329 | 0.70263989 |
| GCC1      | blue | -0.3600661 | 4.80E-07   | 0.50467294 | 2.39E-13   | 0.76519344 |
| GALNT3    | blue | -0.1932259 | 0.00840813 | 0.11195804 | 0.12920438 | 0.75906119 |
| GAK       | blue | -0.3304887 | 4.34E-06   | -0.0014014 | 0.9848951  | 0.81132086 |
| GADD45G   | blue | -0.3811379 | 8.68E-08   | 0.4338585  | 6.86E-10   | 0.75220444 |
| FZR1      | blue | -0.2959046 | 4.32E-05   | 0.01420114 | 0.84785435 | 0.84223992 |
| FUT8-AS1  | blue | -0.242335  | 0.00088911 | 0.03399125 | 0.64599711 | 0.70108083 |
| FUK       | blue | -0.4113808 | 5.99E-09   | 0.26934211 | 0.00020942 | 0.8858543  |
| FTO       | blue | 0.341195   | 2.01E-06   | -0.4229731 | 2.00E-09   | -0.8636613 |
| FTCD      | blue | -0.2551679 | 0.00045602 | -0.0382504 | 0.60520856 | 0.70395538 |
| FOXP1-IT1 | blue | -0.4468692 | 1.82E-10   | 0.38355016 | 7.08E-08   | 0.93928995 |
| FOXJ2     | blue | -0.326498  | 5.74E-06   | 0.04898381 | 0.50788557 | 0.8173587  |
| FNTB      | blue | -0.3232478 | 7.19E-06   | 0.34665803 | 1.34E-06   | 0.67783864 |
| FLAD1     | blue | -0.4290298 | 1.11E-09   | 0.13500212 | 0.06692484 | 0.85939871 |
| FKRP      | blue | -0.2751    | 0.00015078 | -0.0531639 | 0.47231646 | 0.46406965 |

|            |      |            |            |            |            |            |
|------------|------|------------|------------|------------|------------|------------|
| FKBP1A     | blue | 0.26102876 | 0.00033229 | -0.4465909 | 1.87E-10   | -0.8219429 |
| FKBP14     | blue | 0.12894629 | 0.08024228 | -0.0313542 | 0.67180157 | 0.08685688 |
| FICD       | blue | -0.3171727 | 1.09E-05   | 0.07390653 | 0.31741106 | 0.7310481  |
| FHOD3      | blue | 0.52254781 | 2.36E-14   | -0.5982639 | 2.42E-19   | -0.8272854 |
| FGD5       | blue | -0.4164883 | 3.71E-09   | 0.52419216 | 1.90E-14   | 0.7432081  |
| FGD3       | blue | -0.28395   | 8.97E-05   | 0.49267062 | 1.05E-12   | 0.74351523 |
| FER        | blue | -0.3919681 | 3.44E-08   | 0.19325772 | 0.0083972  | 0.7942309  |
| FCF1       | blue | -0.2494291 | 0.00061732 | 0.15945084 | 0.03016204 | 0.68298942 |
| FBXW4      | blue | -0.5304742 | 8.09E-15   | 0.45754015 | 5.85E-11   | 0.86707166 |
| FBXO5      | blue | -0.2807084 | 0.00010871 | 0.29028434 | 6.12E-05   | 0.63359541 |
| FBXL19-AS1 | blue | -0.3334419 | 3.52E-06   | 0.36229469 | 4.03E-07   | 0.79248612 |
| FBL        | blue | -0.406791  | 9.14E-09   | 0.42332012 | 1.93E-09   | 0.80288742 |
| FARP1      | blue | -0.4828356 | 3.40E-12   | 0.48963258 | 1.52E-12   | 0.82332191 |
| FANCE      | blue | -0.340559  | 2.10E-06   | 0.39753585 | 2.11E-08   | 0.88953    |
| FAM53C     | blue | -0.3725549 | 1.77E-07   | 0.32461261 | 6.55E-06   | 0.7727322  |
| FAM234B    | blue | 0.46613221 | 2.28E-11   | -0.5788009 | 6.17E-18   | -0.9172965 |
| FAM167A    | blue | -0.38959   | 4.22E-08   | 0.50719414 | 1.74E-13   | 0.78271796 |
| FAM13C     | blue | -0.1917769 | 0.00892048 | -0.1344861 | 0.06798438 | 0.45201455 |
| FAM13A     | blue | -0.2873383 | 7.32E-05   | 0.1542359  | 0.0360666  | 0.74343081 |
| FAM129B    | blue | -0.5298071 | 8.87E-15   | 0.62127413 | 3.91E-21   | 0.88154922 |
| FAM104B    | blue | -0.2789593 | 0.00012048 | 0.16544447 | 0.02441289 | 0.86458289 |
| FAAP100    | blue | -0.2026289 | 0.00567269 | -0.0792559 | 0.28355    | 0.66874772 |
| EZR        | blue | -0.4988822 | 4.93E-13   | 0.58864616 | 1.23E-18   | 0.87193384 |
| EVI5       | blue | -0.4818674 | 3.80E-12   | 0.30827568 | 1.96E-05   | 0.88902085 |
| ERI3       | blue | -0.2150619 | 0.00328414 | 0.03502443 | 0.63599901 | 0.79941091 |
| ERCC6L2    | blue | -0.2566309 | 0.00042166 | 0.10823009 | 0.14253341 | 0.80937994 |
| ERCC5      | blue | -0.5636287 | 6.67E-17   | 0.32813442 | 5.12E-06   | 0.85962017 |
| ERC2-IT1   | blue | -0.358508  | 5.42E-07   | 0.21366008 | 0.00349816 | 0.90535734 |
| ENO3       | blue | -0.3857997 | 5.85E-08   | 0.26714367 | 0.00023696 | 0.87754244 |
| ENKD1      | blue | -0.3358921 | 2.95E-06   | 0.31140312 | 1.60E-05   | 0.92577787 |
| ENAH       | blue | -0.4778705 | 6.05E-12   | 0.50324585 | 2.86E-13   | 0.83581997 |
| EML3       | blue | -0.5023301 | 3.21E-13   | 0.41462916 | 4.42E-09   | 0.87398503 |
| EIF4H      | blue | 0.27422251 | 0.00015859 | -0.1828915 | 0.01271026 | -0.9208027 |
| EIF4G3     | blue | -0.2220811 | 0.00238006 | -0.0537335 | 0.46757744 | 0.57390051 |
| EIF3B      | blue | -0.406439  | 9.44E-09   | 0.18575832 | 0.01135649 | 0.91253331 |
| EIF2AK4    | blue | -0.4017831 | 1.44E-08   | 0.29010757 | 6.19E-05   | 0.91956613 |
| EID2B      | blue | 0.15005226 | 0.04148445 | -0.0647709 | 0.38106919 | -0.0003905 |
| EHD1       | blue | -0.3659589 | 3.01E-07   | 0.41206314 | 5.62E-09   | 0.86137049 |
| EGLN2      | blue | -0.2737512 | 0.00016294 | 0.12733893 | 0.08411449 | 0.88353498 |
| EFEMP2     | blue | -0.4890671 | 1.62E-12   | 0.53123685 | 7.29E-15   | 0.88263478 |
| ECHDC2     | blue | -0.4990268 | 4.84E-13   | 0.5022621  | 3.24E-13   | 0.80765342 |
| DYX1C1     | blue | -0.3316645 | 3.99E-06   | 0.24760547 | 0.0006787  | 0.86651817 |
| DYRK2      | blue | -0.2124252 | 0.00369704 | 0.0764291  | 0.30112889 | 0.7236938  |
| DYNC1H1    | blue | 0.3471755  | 1.29E-06   | -0.6580789 | 2.49E-24   | -0.7115647 |
| DTWD2      | blue | -0.3201693 | 8.88E-06   | 0.30081731 | 3.17E-05   | 0.81484967 |
| DSEL       | blue | -0.4278841 | 1.24E-09   | 0.19762156 | 0.00700998 | 0.90696702 |

|         |      |            |            |            |            |            |
|---------|------|------------|------------|------------|------------|------------|
| DPP7    | blue | -0.4681737 | 1.82E-11   | 0.15914294 | 0.03048619 | 0.87837464 |
| DOPEY2  | blue | -0.3102296 | 1.73E-05   | 0.10139115 | 0.16967054 | 0.8644176  |
| DOC2A   | blue | 0.3218273  | 7.93E-06   | -0.5577436 | 1.63E-16   | -0.7793104 |
| DNAJB12 | blue | -0.3974453 | 2.12E-08   | 0.22470208 | 0.00210514 | 0.89516614 |
| DNAAF5  | blue | -0.5754408 | 1.06E-17   | 0.46268811 | 3.34E-11   | 0.82897569 |
| DLC1    | blue | -0.5616984 | 8.95E-17   | 0.37743153 | 1.18E-07   | 0.89685759 |
| DISC1   | blue | -0.4605824 | 4.21E-11   | 0.32429955 | 6.69E-06   | 0.86685383 |
| DIO3OS  | blue | -0.3822772 | 7.89E-08   | 0.41138896 | 5.98E-09   | 0.81452687 |
| DHX37   | blue | -0.1846694 | 0.01185497 | -0.004575  | 0.95071775 | 0.81129658 |
| DHDDS   | blue | 0.40206665 | 1.40E-08   | -0.593286  | 5.66E-19   | -0.6946184 |
| DFFA    | blue | -0.4692492 | 1.61E-11   | 0.41058019 | 6.45E-09   | 0.88358877 |
| DENR    | blue | -0.4629272 | 3.25E-11   | 0.36938859 | 2.29E-07   | 0.92178728 |
| DENND4C | blue | -0.4602818 | 4.35E-11   | 0.35310179 | 8.23E-07   | 0.92083541 |
| DDX27   | blue | -0.576177  | 9.40E-18   | 0.38143647 | 8.47E-08   | 0.90368278 |
| DDX24   | blue | 0.29754551 | 3.90E-05   | -0.6603715 | 1.52E-24   | -0.7934625 |
| DCLRE1C | blue | -0.4577238 | 5.73E-11   | 0.37056997 | 2.08E-07   | 0.91519382 |
| DCAF11  | blue | -0.343292  | 1.72E-06   | 0.26218165 | 0.00031196 | 0.92321284 |
| DBT     | blue | -0.4633849 | 3.09E-11   | 0.35437555 | 7.46E-07   | 0.86980236 |
| CUEDC1  | blue | -0.5171414 | 4.83E-14   | 0.34348873 | 1.70E-06   | 0.83281807 |
| CTSB    | blue | -0.4134593 | 4.93E-09   | 0.36425531 | 3.45E-07   | 0.90350863 |
| CTNS    | blue | -0.3976474 | 2.09E-08   | 0.41328346 | 5.02E-09   | 0.84727249 |
| CSTB    | blue | -0.2776132 | 0.00013033 | 0.45727375 | 6.02E-11   | -0.4653586 |
| CSRNP1  | blue | -0.3849217 | 6.31E-08   | 0.36833067 | 2.49E-07   | 0.82859821 |
| CSPG4   | blue | -0.5099036 | 1.23E-13   | 0.43761255 | 4.70E-10   | 0.85545599 |
| CSNK2A1 | blue | 0.41229534 | 5.50E-09   | -0.3070747 | 2.12E-05   | -0.9357481 |
| CSNK1G2 | blue | -0.4546247 | 8.00E-11   | 0.43860825 | 4.25E-10   | 0.87364297 |
| CSNK1E  | blue | -0.3351238 | 3.12E-06   | 0.18600983 | 0.01124401 | 0.85373951 |
| CSF2RA  | blue | -0.3439291 | 1.64E-06   | 0.35346375 | 8.00E-07   | 0.86839728 |
| CRCP    | blue | -0.4033303 | 1.25E-08   | 0.30718477 | 2.11E-05   | 0.73261066 |
| CPSF4   | blue | -0.3037406 | 2.63E-05   | 0.15281081 | 0.0378407  | 0.84813972 |
| COX6B1  | blue | 0.48834143 | 1.77E-12   | -0.4721242 | 1.17E-11   | -0.7910622 |
| COX19   | blue | -0.5331491 | 5.60E-15   | 0.42010693 | 2.63E-09   | 0.94716923 |
| COL11A1 | blue | -0.2664379 | 0.00024649 | 0.26527667 | 0.00026296 | 0.4846755  |
| COASY   | blue | -0.3043076 | 2.54E-05   | 0.23318116 | 0.0014019  | 0.87955493 |
| CMTR1   | blue | -0.2991945 | 3.52E-05   | -0.115532  | 0.11734796 | 0.73397998 |
| CLK3    | blue | -0.5700698 | 2.47E-17   | 0.40177774 | 1.44E-08   | 0.90931599 |
| CLCN7   | blue | -0.5545377 | 2.62E-16   | 0.37625817 | 1.30E-07   | 0.90708582 |
| CIB1    | blue | -0.3972554 | 2.16E-08   | 0.39239141 | 3.31E-08   | 0.8196404  |
| CIAO1   | blue | -0.3832339 | 7.28E-08   | 0.15216237 | 0.03867201 | 0.86393955 |
| CHST12  | blue | -0.3712857 | 1.96E-07   | 0.26611133 | 0.00025102 | 0.86675732 |
| CHMP4A  | blue | -0.355607  | 6.79E-07   | 0.4061524  | 9.69E-09   | 0.83641029 |
| CFLAR   | blue | -0.5753524 | 1.07E-17   | 0.58384103 | 2.72E-18   | 0.86252253 |
| CETN3   | blue | -0.3847138 | 6.42E-08   | 0.19898494 | 0.00662054 | 0.88086081 |
| CEP290  | blue | -0.4043242 | 1.14E-08   | 0.25883405 | 0.00037443 | 0.83045748 |
| CEP164  | blue | -0.3324075 | 3.79E-06   | 0.06691414 | 0.36547772 | 0.86004205 |
| CEP131  | blue | -0.2425985 | 0.00087731 | 0.10383651 | 0.1595574  | 0.87747956 |

|          |      |            |            |            |            |            |
|----------|------|------------|------------|------------|------------|------------|
| CENPB    | blue | -0.4914529 | 1.22E-12   | 0.40234761 | 1.37E-08   | 0.91956366 |
| CEBPZ    | blue | -0.3110598 | 1.64E-05   | 0.32369016 | 6.98E-06   | 0.86471558 |
| CDKN2AIP | blue | -0.3305839 | 4.31E-06   | 0.27082937 | 0.00019252 | 0.809684   |
| CDKL3    | blue | -0.322996  | 7.32E-06   | 0.37154139 | 1.92E-07   | 0.62677105 |
| CDK11A   | blue | -0.5250124 | 1.70E-14   | 0.25375123 | 0.00049174 | 0.83612082 |
| CDK10    | blue | -0.4038644 | 1.19E-08   | 0.19144327 | 0.00904228 | 0.88803464 |
| CDC42BPA | blue | -0.3275636 | 5.33E-06   | 0.12845553 | 0.081409   | 0.48981503 |
| CD68     | blue | -0.4257531 | 1.53E-09   | 0.40000671 | 1.69E-08   | 0.88528562 |
| CCNT1    | blue | -0.4225512 | 2.08E-09   | 0.51640103 | 5.32E-14   | 0.83115356 |
| CCND3    | blue | -0.4991573 | 4.76E-13   | 0.42896355 | 1.11E-09   | 0.88393696 |
| CCM2     | blue | -0.2956778 | 4.39E-05   | -0.0123124 | 0.86789111 | 0.73088808 |
| CCL5     | blue | -0.3020019 | 2.94E-05   | 0.25508352 | 0.00045808 | 0.82710756 |
| CCDC94   | blue | -0.3189864 | 9.62E-06   | 0.13850323 | 0.0600875  | 0.8551118  |
| CCDC93   | blue | -0.4315352 | 8.64E-10   | 0.31272688 | 1.46E-05   | 0.91090553 |
| CCDC151  | blue | -0.5856452 | 2.03E-18   | 0.49218956 | 1.12E-12   | 0.72429    |
| CCDC137  | blue | -0.3685418 | 2.45E-07   | 0.1116298  | 0.13033796 | 0.74984771 |
| CCDC125  | blue | -0.3176294 | 1.06E-05   | 0.35956429 | 4.99E-07   | 0.80384099 |
| CCDC115  | blue | 0.44700135 | 1.79E-10   | -0.4894796 | 1.55E-12   | -0.7222928 |
| CASP2    | blue | -0.4560327 | 6.88E-11   | 0.48488875 | 2.67E-12   | 0.84644202 |
| CAPS     | blue | -0.4484305 | 1.54E-10   | 0.48707142 | 2.06E-12   | 0.82627804 |
| CADM4    | blue | -0.4794577 | 5.03E-12   | 0.34687099 | 1.32E-06   | 0.78534714 |
| C9orf64  | blue | -0.3803955 | 9.24E-08   | 0.19000478 | 0.0095845  | 0.88589235 |
| C8orf37  | blue | -0.2764124 | 0.00013975 | 0.31620469 | 1.16E-05   | 0.75260495 |
| C5orf22  | blue | 0.50731476 | 1.71E-13   | -0.438549  | 4.27E-10   | -0.8975766 |
| C4orf3   | blue | -0.4827686 | 3.42E-12   | 0.33709269 | 2.71E-06   | 0.89139512 |
| C2CD2    | blue | -0.4556234 | 7.19E-11   | 0.56318143 | 7.14E-17   | 0.83582935 |
| C21orf58 | blue | -0.4947114 | 8.22E-13   | 0.32526482 | 6.26E-06   | 0.79778966 |
| C20orf27 | blue | -0.1531993 | 0.03734992 | 0.09664886 | 0.19062834 | 0.82127507 |
| C11orf63 | blue | -0.2014998 | 0.00595251 | 0.07818604 | 0.29012041 | 0.65159737 |
| C11orf49 | blue | 0.24751091 | 0.00068203 | -0.3044035 | 2.52E-05   | -0.8319364 |
| BST2     | blue | -0.5244417 | 1.83E-14   | 0.44826511 | 1.57E-10   | 0.81371872 |
| BRSK2    | blue | -0.3369891 | 2.73E-06   | 0.1111501  | 0.13200838 | 0.83348222 |
| BRPF1    | blue | -0.5324181 | 6.20E-15   | 0.43739128 | 4.81E-10   | 0.86970993 |
| BRD2     | blue | -0.3065089 | 2.20E-05   | 0.11093923 | 0.13274786 | 0.77776173 |
| BRAT1    | blue | -0.2865295 | 7.68E-05   | 0.26874627 | 0.00021658 | 0.91084971 |
| BOP1     | blue | -0.288283  | 6.91E-05   | -0.0085485 | 0.90806002 | 0.86590405 |
| BNIP1    | blue | -0.3726903 | 1.75E-07   | 0.45698444 | 6.21E-11   | 0.6232325  |
| BMP8B    | blue | -0.3240766 | 6.79E-06   | 0.13467285 | 0.06759931 | 0.76127062 |
| BMP7     | blue | -0.3814307 | 8.47E-08   | 0.47833754 | 5.73E-12   | 0.7388716  |
| BLZF1    | blue | -0.2600617 | 0.00035029 | 0.27306336 | 0.0001695  | 0.76977787 |
| BIRC3    | blue | -0.2561444 | 0.00043281 | 0.27379305 | 0.00016255 | 0.71350491 |
| BEX3     | blue | 0.50036212 | 4.10E-13   | -0.5519692 | 3.83E-16   | -0.8989986 |
| BCL2L12  | blue | -0.522985  | 2.23E-14   | 0.54905525 | 5.87E-16   | 0.82297565 |
| BCAS4    | blue | -0.2309909 | 0.0015593  | -0.1539014 | 0.03647662 | 0.69072868 |
| B4GALT4  | blue | -0.4113137 | 6.03E-09   | 0.40720481 | 8.80E-09   | 0.81115984 |
| AXL      | blue | -0.5126454 | 8.66E-14   | 0.59761683 | 2.70E-19   | 0.83946454 |

|          |      |            |            |            |            |            |
|----------|------|------------|------------|------------|------------|------------|
| ATP5H    | blue | 0.56678843 | 4.11E-17   | -0.4662335 | 2.26E-11   | -0.8390072 |
| ATP2B4   | blue | 0.28524632 | 8.30E-05   | -0.4132884 | 5.01E-09   | -0.7205256 |
| ATP13A1  | blue | -0.3108372 | 1.66E-05   | 0.15808101 | 0.03162707 | 0.83242176 |
| ATG12    | blue | -0.471783  | 1.21E-11   | 0.18980234 | 0.00966306 | 0.91357258 |
| ATG10    | blue | -0.3989186 | 1.86E-08   | 0.14303416 | 0.05210232 | 0.8256692  |
| ATF6B    | blue | -0.3887392 | 4.55E-08   | 0.19619139 | 0.00744029 | 0.89222863 |
| ASUN     | blue | -0.5194339 | 3.57E-14   | 0.36656422 | 2.87E-07   | 0.90754003 |
| ASIC1    | blue | -0.1255764 | 0.08853135 | 0.0093209  | 0.89979415 | 0.76472304 |
| ASCC2    | blue | -0.3840329 | 6.80E-08   | 0.38342391 | 7.16E-08   | 0.89797258 |
| ASAP3    | blue | -0.4814034 | 4.01E-12   | 0.45012031 | 1.29E-10   | 0.84133974 |
| ARPP21   | blue | -0.506894  | 1.81E-13   | 0.18997006 | 0.00959793 | 0.74135919 |
| ARPC3    | blue | 0.17788685 | 0.01541513 | 0.09928639 | 0.17875037 | -0.8108891 |
| ARL2     | blue | -0.2763885 | 0.00013995 | -0.0421164 | 0.56921019 | 0.84341642 |
| ARID4B   | blue | -0.5558045 | 2.17E-16   | 0.41367996 | 4.83E-09   | 0.83560992 |
| ARHGEF9  | blue | 0.48011297 | 4.67E-12   | -0.5665457 | 4.26E-17   | -0.8092976 |
| ARHGEF18 | blue | -0.2718296 | 0.00018187 | 0.18330136 | 0.01250841 | 0.80506918 |
| ARHGAP17 | blue | -0.6032419 | 1.02E-19   | 0.56480062 | 5.58E-17   | 0.84322395 |
| ARF3     | blue | 0.377353   | 1.19E-07   | -0.6439425 | 4.74E-23   | -0.7738777 |
| ARCN1    | blue | 0.21466735 | 0.00334314 | 0.04067709 | 0.58249372 | -0.8327607 |
| ARAP3    | blue | -0.4372778 | 4.86E-10   | 0.48702727 | 2.07E-12   | 0.7773149  |
| ARAP2    | blue | -0.306533  | 2.20E-05   | 0.19577027 | 0.0075714  | 0.61203062 |
| APMAP    | blue | 0.44724117 | 1.75E-10   | -0.5016591 | 3.49E-13   | -0.7922018 |
| API5     | blue | 0.36237806 | 4.00E-07   | -0.1604502 | 0.0291301  | -0.8971478 |
| APEX1    | blue | 0.16608592 | 0.02385745 | -0.1296399 | 0.0786163  | -0.8449133 |
| ANXA2R   | blue | -0.4405514 | 3.49E-10   | 0.51813611 | 4.24E-14   | 0.78174272 |
| ANKRD35  | blue | -0.5671575 | 3.88E-17   | 0.52704973 | 1.29E-14   | 0.80454332 |
| ANKRD13D | blue | -0.4731255 | 1.04E-11   | 0.31075605 | 1.67E-05   | 0.90810977 |
| AMT      | blue | -0.2776832 | 0.0001298  | 0.17385957 | 0.01794401 | 0.7729169  |
| ALPP     | blue | -0.3037798 | 2.63E-05   | 0.26205503 | 0.00031414 | 0.81718212 |
| ALDOA    | blue | 0.16416833 | 0.02555103 | -0.3450857 | 1.51E-06   | -0.8314481 |
| ALDH4A1  | blue | -0.4865092 | 2.20E-12   | 0.52191786 | 2.57E-14   | 0.81647373 |
| AKIRIN1  | blue | -0.3661438 | 2.97E-07   | 0.23210169 | 0.00147756 | 0.58493715 |
| AK1      | blue | -0.3403354 | 2.14E-06   | 0.33406247 | 3.37E-06   | 0.88937595 |
| AJAP1    | blue | -0.1763693 | 0.01632896 | -0.0414854 | 0.57501582 | 0.52336548 |
| AIRE     | blue | -0.3676007 | 2.64E-07   | 0.36805659 | 2.55E-07   | 0.82663178 |
| AHR      | blue | -0.4520953 | 1.05E-10   | 0.35108313 | 9.60E-07   | 0.88975164 |
| AGO2     | blue | -0.5492342 | 5.72E-16   | 0.38823526 | 4.75E-08   | 0.92372292 |
| ADH4     | blue | -0.2948687 | 4.61E-05   | 0.1076918  | 0.14454154 | 0.82906122 |
| ADAM22   | blue | -0.3569855 | 6.10E-07   | 0.24504445 | 0.00077443 | 0.79624449 |
| ADAM17   | blue | -0.3447461 | 1.54E-06   | 0.18326082 | 0.01252825 | 0.91065978 |
| ACOT9    | blue | -0.3035849 | 2.66E-05   | 0.2518641  | 0.00054334 | 0.85110085 |
| ACBD7    | blue | -0.4012048 | 1.52E-08   | 0.50506641 | 2.28E-13   | 0.74351317 |
| ACACB    | blue | -0.5091141 | 1.36E-13   | 0.56969158 | 2.62E-17   | 0.86895238 |
| ABTB1    | blue | -0.2552643 | 0.00045368 | 0.07833767 | 0.28918308 | 0.81679339 |
| ABL1     | blue | -0.4159584 | 3.90E-09   | 0.37539999 | 1.40E-07   | 0.94581551 |
| ABHD8    | blue | -0.2954221 | 4.46E-05   | 0.11546902 | 0.11754931 | 0.78450721 |

|           |       |            |            |            |            |            |
|-----------|-------|------------|------------|------------|------------|------------|
| ABHD17C   | blue  | -0.2296191 | 0.00166594 | 0.17913818 | 0.01469551 | 0.83804605 |
| ABCB7     | blue  | -0.4861527 | 2.30E-12   | 0.40125618 | 1.51E-08   | 0.89781464 |
| AADAT     | blue  | -0.2962687 | 4.23E-05   | 0.06203325 | 0.40156312 | 0.6987991  |
| ZNF576    | brown | -0.4100661 | 6.76E-09   | 0.05642904 | 0.44550877 | 0.05565914 |
| XCR1      | brown | -0.2467305 | 0.00071011 | -0.1150069 | 0.11903487 | -0.2801903 |
| WHRN      | brown | -0.3445621 | 1.57E-06   | 0.01896295 | 0.79779724 | -0.3764086 |
| WASH7P    | brown | -0.4578638 | 5.65E-11   | 0.08396388 | 0.25583126 | -0.0042067 |
| VWA7      | brown | -0.2890383 | 6.60E-05   | -0.0778541 | 0.29217909 | -0.2114265 |
| VPS52     | brown | -0.3769846 | 1.23E-07   | -0.1048761 | 0.15539775 | -0.3300878 |
| VNN1      | brown | -0.2809071 | 0.00010745 | -0.0443143 | 0.54920754 | -0.2545042 |
| VN1R2     | brown | -0.2087633 | 0.00434817 | -0.1560835 | 0.03387164 | -0.285128  |
| ULK3      | brown | -0.29078   | 5.94E-05   | -0.1925055 | 0.00865951 | -0.3780939 |
| TTC7B     | brown | -0.165599  | 0.0242781  | -0.2217235 | 0.00242    | -0.3626929 |
| TRIML1    | brown | -0.4335864 | 7.05E-10   | 0.07160084 | 0.33278489 | -0.0184726 |
| TNXB      | brown | -0.2711245 | 0.00018932 | -0.1198331 | 0.10422242 | -0.1929866 |
| TNFRSF9   | brown | -0.2985315 | 3.67E-05   | -0.0714161 | 0.33403714 | -0.1563382 |
| TNFRSF10C | brown | -0.4003287 | 1.64E-08   | 0.03034973 | 0.68173438 | -0.0042005 |
| TMEM80    | brown | -0.4440138 | 2.44E-10   | 0.05434337 | 0.46253253 | -0.1532827 |
| TMEM198   | brown | -0.2890116 | 6.61E-05   | -0.1555721 | 0.03446756 | -0.1640469 |
| TLCD1     | brown | -0.2960992 | 4.27E-05   | 0.09873817 | 0.18117315 | 0.01389061 |
| THEG      | brown | -0.353004  | 8.29E-07   | -0.0505305 | 0.49456453 | -0.0767159 |
| TBX6      | brown | -0.2875587 | 7.22E-05   | -0.0690012 | 0.35068095 | -0.2619331 |
| TBC1D10B  | brown | -0.2788727 | 0.00012109 | -0.2593712 | 0.00036368 | -0.3412793 |
| SYT5      | brown | -0.2033029 | 0.0055113  | -0.1748105 | 0.01731646 | -0.3746831 |
| SUPT6H    | brown | -0.2874984 | 7.25E-05   | -0.1084675 | 0.14165433 | -0.3730304 |
| SULT2B1   | brown | -0.2827141 | 9.65E-05   | -0.0930358 | 0.20782067 | -0.2576638 |
| STAC2     | brown | -0.194047  | 0.00812958 | -0.2585382 | 0.00038047 | -0.4665999 |
| SSX5      | brown | -0.3997392 | 1.73E-08   | 0.12720185 | 0.08445154 | 0.02984214 |
| SRC       | brown | -0.2902947 | 6.11E-05   | -0.289272  | 6.51E-05   | -0.1579088 |
| SPACA4    | brown | -0.3079905 | 2.00E-05   | -0.0690118 | 0.3506065  | -0.2447291 |
| SP6       | brown | -0.3148389 | 1.27E-05   | -0.0208178 | 0.77850794 | -0.1937148 |
| SNX32     | brown | -0.286182  | 7.85E-05   | -0.1203976 | 0.10258918 | -0.2985589 |
| SMU1      | brown | -0.4111131 | 6.14E-09   | 0.09176419 | 0.21412916 | -0.0275702 |
| SMG6      | brown | -0.42021   | 2.61E-09   | 0.09175782 | 0.21416112 | 0.04336438 |
| SLCO1B1   | brown | -0.3512675 | 9.46E-07   | -0.0093051 | 0.89996321 | -0.0101595 |
| SLC35G6   | brown | -0.4117189 | 5.80E-09   | -0.0114199 | 0.87738955 | -0.0331938 |
| SLC2A11   | brown | -0.2330078 | 0.00141381 | -0.1857027 | 0.01138148 | -0.2754249 |
| SLC23A1   | brown | -0.3774168 | 1.18E-07   | 0.05192091 | 0.48274914 | -0.0526298 |
| SLC16A2   | brown | -0.3903889 | 3.94E-08   | 0.0835842  | 0.25799488 | -0.1529431 |
| SLC13A3   | brown | -0.3398858 | 2.21E-06   | -0.0108689 | 0.88326216 | -0.2754625 |
| SIT1      | brown | -0.2960769 | 4.28E-05   | -0.0659505 | 0.37243841 | -0.2844906 |
| SIPA1L3   | brown | -0.4401431 | 3.63E-10   | 0.03811784 | 0.60646085 | -0.0457295 |
| SIGLEC5   | brown | -0.3557936 | 6.69E-07   | 0.00320065 | 0.9655113  | -0.1268536 |
| SIGIRR    | brown | -0.3697869 | 2.21E-07   | 0.02164156 | 0.76998368 | -0.0695474 |
| SH3BGRL3  | brown | -0.3967407 | 2.26E-08   | 0.00819414 | 0.91185521 | -0.253215  |
| SGCA      | brown | -0.3497009 | 1.07E-06   | -0.0188372 | 0.79911002 | -0.1774351 |

|          |       |            |            |            |            |            |
|----------|-------|------------|------------|------------|------------|------------|
| SERPINB7 | brown | -0.2561349 | 0.00043303 | -0.1434028 | 0.05149334 | -0.3334384 |
| SEMA4G   | brown | -0.3180207 | 1.03E-05   | -0.0557214 | 0.45124454 | -0.198084  |
| SCAF1    | brown | -0.1664277 | 0.02356592 | -0.2043772 | 0.00526257 | -0.4517149 |
| RWDD2B   | brown | -0.1860222 | 0.0112385  | -0.1663279 | 0.02365078 | -0.3631256 |
| RTP4     | brown | -0.3110174 | 1.64E-05   | -0.0159656 | 0.82922382 | -0.2028434 |
| RPS6KL1  | brown | -0.3287888 | 4.89E-06   | -0.2233979 | 0.00223811 | -0.1226705 |
| RNF5     | brown | -0.3765438 | 1.27E-07   | 0.08351968 | 0.25836382 | -0.2406973 |
| RGS6     | brown | -0.1498511 | 0.04176129 | -0.2395893 | 0.00102108 | -0.3876546 |
| REG3G    | brown | -0.2277068 | 0.00182571 | -0.1248464 | 0.09041432 | -0.2811979 |
| RCAN3    | brown | -0.2331493 | 0.00140408 | -0.0799135 | 0.27956175 | -0.3186211 |
| RASSF5   | brown | -0.3878886 | 4.89E-08   | 0.01164055 | 0.87503937 | 0.01490918 |
| RAMP2    | brown | -0.4467869 | 1.83E-10   | 0.08659476 | 0.2411826  | -0.0265008 |
| PSORS1C1 | brown | -0.2940062 | 4.87E-05   | -0.1213437 | 0.09989723 | -0.2427003 |
| PSENN    | brown | -0.4611241 | 3.96E-11   | 0.1111596  | 0.13197512 | 0.00410873 |
| PRTN3    | brown | -0.3637976 | 3.58E-07   | 0.0550156  | 0.45700669 | -0.0424382 |
| PRPF8    | brown | -0.3174893 | 1.07E-05   | -0.2112083 | 0.00390296 | -0.3706391 |
| PRDM9    | brown | -0.2972993 | 3.96E-05   | -0.1382186 | 0.06062107 | 0.02313046 |
| PPIL2    | brown | -0.2924662 | 5.35E-05   | -0.1268344 | 0.08536033 | -0.2130986 |
| PM20D1   | brown | -0.3511286 | 9.56E-07   | -0.0006655 | 0.99282692 | -0.0228831 |
| PLP2     | brown | -0.3693094 | 2.30E-07   | 0.06673022 | 0.36679994 | -0.1737997 |
| PGLYRP4  | brown | -0.3818904 | 8.15E-08   | -0.0337499 | 0.64834192 | -0.1049238 |
| PCGF3    | brown | -0.3140112 | 1.34E-05   | -0.0739758 | 0.31695674 | -0.2234632 |
| PAX7     | brown | -0.257007  | 0.00041323 | -0.0924496 | 0.21071224 | -0.3040226 |
| PADI1    | brown | -0.2522633 | 0.00053203 | -0.0775244 | 0.29423402 | -0.2675457 |
| OR8G2    | brown | -0.3732285 | 1.67E-07   | 0.00190638 | 0.97945371 | -0.0971145 |
| OR52N2   | brown | -0.400938  | 1.55E-08   | 0.06128305 | 0.40729159 | 0.02149517 |
| OR52E6   | brown | -0.3421037 | 1.88E-06   | 0.0507459  | 0.49272398 | -0.0567215 |
| OR52D1   | brown | -0.2573582 | 0.00040549 | -0.0574616 | 0.43721357 | -0.2481002 |
| OR51D1   | brown | -0.3487483 | 1.14E-06   | 0.04631265 | 0.5313237  | -0.0978591 |
| OR4F21   | brown | -0.2477433 | 0.00067387 | -0.105003  | 0.15489545 | -0.30455   |
| OR2W5    | brown | -0.3886651 | 4.58E-08   | 0.00418567 | 0.95490717 | -0.1188989 |
| OR2T6    | brown | -0.2325065 | 0.00144876 | -0.1234128 | 0.09420492 | -0.2616746 |
| OR2T12   | brown | -0.2574975 | 0.00040246 | -0.1179063 | 0.10995181 | -0.296184  |
| OR2T11   | brown | -0.3626749 | 3.91E-07   | 0.02465615 | 0.73903043 | 0.01483262 |
| OR2A42   | brown | -0.3166348 | 1.13E-05   | -0.0519247 | 0.48271698 | -0.0368045 |
| OLFM2    | brown | -0.2487461 | 0.00063969 | -0.036288  | 0.62386074 | -0.315417  |
| ODF4     | brown | -0.2679938 | 0.00022594 | -0.1397486 | 0.05779843 | -0.284455  |
| OAS1     | brown | -0.3103064 | 1.72E-05   | -0.0335932 | 0.64986638 | -0.2560144 |
| NRG3     | brown | -0.1799985 | 0.01421798 | -0.2441069 | 0.00081247 | -0.1736231 |
| NR1D1    | brown | -0.2487035 | 0.0006411  | -0.1966609 | 0.00729651 | -0.3073089 |
| NHLH1    | brown | -0.3158181 | 1.19E-05   | -0.0325673 | 0.65988096 | -0.2323179 |
| NEDD4    | brown | -0.364748  | 3.32E-07   | 0.10541823 | 0.15326109 | -0.2079044 |
| MYOZ1    | brown | -0.3402805 | 2.15E-06   | -0.0192933 | 0.79435269 | -0.1442758 |
| MUC6     | brown | -0.2948667 | 4.61E-05   | -0.0902193 | 0.2219764  | -0.2783333 |
| MS4A15   | brown | -0.2456169 | 0.00075201 | -0.1121089 | 0.12868581 | -0.2327589 |
| MIR877   | brown | -0.3479878 | 1.21E-06   | -0.0348338 | 0.63783907 | -0.1438512 |



|            |       |            |            |            |            |            |
|------------|-------|------------|------------|------------|------------|------------|
| MIR1267    | brown | -0.3951165 | 2.61E-08   | 0.02184043 | 0.7679299  | -0.0555344 |
| MIR1224    | brown | -0.3358511 | 2.96E-06   | -0.0563457 | 0.44618227 | -0.2369355 |
| MGAT5B     | brown | -0.2013937 | 0.00597943 | -0.1688256 | 0.02160577 | -0.3557348 |
| MESDC2     | brown | -0.2285654 | 0.00175233 | -0.1354101 | 0.06609684 | -0.2409504 |
| MAPK15     | brown | -0.2957824 | 4.36E-05   | -0.0464147 | 0.53041848 | -0.1938381 |
| MAGEA12    | brown | -0.3237769 | 6.93E-06   | -0.0293987 | 0.6911894  | -0.1341103 |
| LYPD3      | brown | -0.4520789 | 1.05E-10   | 0.07862827 | 0.28739235 | -0.049118  |
| LY9        | brown | -0.3741335 | 1.55E-07   | 0.02172667 | 0.76910457 | -0.0339571 |
| LUZP2      | brown | -0.3989666 | 1.85E-08   | -0.0393045 | 0.59529334 | 0.05327575 |
| LRRC71     | brown | -0.2769207 | 0.00013569 | -0.0809424 | 0.27339743 | -0.2574046 |
| LRRC46     | brown | -0.355842  | 6.67E-07   | 0.0056349  | 0.93932041 | -0.0322425 |
| LRP2BP     | brown | -0.2381823 | 0.00109546 | -0.0952931 | 0.19695369 | -0.2686759 |
| LOC650293  | brown | -0.3259292 | 5.97E-06   | -0.005     | 0.9461469  | -0.1141382 |
| LOC284933  | brown | -0.2737136 | 0.0001633  | -0.0664351 | 0.36892761 | -0.1864261 |
| LOC202181  | brown | -0.2819899 | 0.00010078 | -0.1581522 | 0.0315495  | -0.3355465 |
| LOC1019271 | brown | -0.3873367 | 5.13E-08   | 0.00759171 | 0.91831213 | -0.0858445 |
| LOC1001283 | brown | -0.2388235 | 0.00106097 | -0.1041347 | 0.15835597 | -0.2981056 |
| LGALS12    | brown | -0.2967502 | 4.10E-05   | -0.0764673 | 0.30088697 | -0.2547099 |
| LENG8      | brown | -0.2491737 | 0.0006256  | -0.1705261 | 0.02030253 | -0.3349108 |
| KRTAP8-1   | brown | -0.2662289 | 0.00024939 | -0.0677934 | 0.35919759 | -0.2582503 |
| KRTAP5-10  | brown | -0.253601  | 0.00049567 | -0.0967399 | 0.19020901 | -0.2756672 |
| KRTAP13-1  | brown | -0.2070611 | 0.00468455 | -0.150387  | 0.0410271  | -0.3214957 |
| KRT84      | brown | -0.2395913 | 0.00102098 | -0.0821854 | 0.26607417 | -0.2672803 |
| KLK10      | brown | -0.3404626 | 2.12E-06   | -0.0058769 | 0.93671927 | -0.1456487 |
| KDR        | brown | -0.2914784 | 5.69E-05   | 0.01079209 | 0.88408118 | -0.1993298 |
| KCND3      | brown | -0.2658809 | 0.00025427 | -0.1302313 | 0.07725101 | -0.2892762 |
| ITGA7      | brown | -0.4814169 | 4.01E-12   | 0.11427576 | 0.12141496 | -0.0242155 |
| IRX6       | brown | -0.262973  | 0.00029868 | -0.1474409 | 0.04520098 | -0.2623855 |
| IRF2BP1    | brown | -0.2583144 | 0.0003851  | -0.1917722 | 0.00892217 | -0.3773132 |
| IRF2       | brown | -0.2586676 | 0.00037782 | 0.01167115 | 0.87471356 | -0.4087724 |
| IL17C      | brown | -0.2362525 | 0.00120558 | -0.1359267 | 0.06506025 | -0.2632143 |
| IGF2BP1    | brown | -0.35952   | 5.01E-07   | -0.0002799 | 0.99698255 | -0.1064441 |
| IFNL2      | brown | -0.2554854 | 0.00044835 | -0.115194  | 0.11843163 | -0.2932128 |
| HSFY1P1    | brown | -0.4080684 | 8.13E-09   | 0.07625786 | 0.30221643 | 0.07106251 |
| HOXC10     | brown | -0.3161065 | 1.17E-05   | -0.0297796 | 0.68739662 | -0.1651361 |
| HOXB1      | brown | -0.2811674 | 0.00010581 | -0.0706301 | 0.33939765 | -0.2382895 |
| HOXA7      | brown | -0.2591909 | 0.00036726 | -0.0662227 | 0.37046376 | -0.2582096 |
| HOXA6      | brown | -0.2764679 | 0.0001393  | -0.1288735 | 0.08041441 | -0.2874612 |
| HCN4       | brown | -0.2640012 | 0.00028221 | -0.069244  | 0.34898455 | -0.3119252 |
| HAAO       | brown | -0.271415  | 0.00018622 | -0.1043839 | 0.15735695 | -0.2664621 |
| GUCA1A     | brown | -0.2361062 | 0.00121433 | -0.0968621 | 0.18964717 | -0.0413726 |
| GP6        | brown | -0.3686793 | 2.42E-07   | -0.1050342 | 0.15477235 | -0.0886586 |
| GNAT1      | brown | -0.305431  | 2.36E-05   | -0.0681228 | 0.35686198 | -0.2426331 |
| GDPD4      | brown | -0.3664537 | 2.90E-07   | 0.06676779 | 0.36652963 | -0.0416837 |
| GALE       | brown | -0.2650498 | 0.00026629 | -0.109281  | 0.13867411 | -0.2682183 |
| FXD2       | brown | -0.2809264 | 0.00010732 | -0.060947  | 0.40987332 | -0.2377124 |

|           |       |            |            |            |            |            |
|-----------|-------|------------|------------|------------|------------|------------|
| FOSL1     | brown | -0.3230811 | 7.28E-06   | -0.0847444 | 0.25142305 | -0.220297  |
| FIBCD1    | brown | -0.4255186 | 1.56E-09   | -0.0086667 | 0.9067943  | -0.0204396 |
| FGFBP3    | brown | -0.2744279 | 0.00015673 | -0.0861701 | 0.24350666 | -0.2707041 |
| FGF23     | brown | -0.4075667 | 8.52E-09   | 0.03042501 | 0.68098801 | -0.0026452 |
| FFAR3     | brown | -0.3568671 | 6.16E-07   | 0.00863817 | 0.90709966 | -0.0465791 |
| FAM83F    | brown | -0.4484479 | 1.54E-10   | 0.01943364 | 0.79289024 | 0.03764096 |
| FAM219A   | brown | -0.3342604 | 3.32E-06   | -0.17654   | 0.01622387 | -0.2015042 |
| FAM178B   | brown | -0.3268952 | 5.59E-06   | -0.2259513 | 0.00198455 | -0.258412  |
| FAM155B   | brown | -0.259035  | 0.00037037 | -0.1030649 | 0.16269861 | -0.25802   |
| FAM110A   | brown | -0.4164665 | 3.72E-09   | 0.05000983 | 0.49902796 | 0.02008599 |
| EPYC      | brown | -0.2549859 | 0.00046047 | -0.061129  | 0.40847376 | -0.2434379 |
| EPHA8     | brown | -0.4406722 | 3.44E-10   | 0.05628531 | 0.44667041 | -0.0673059 |
| EIF4EBP2  | brown | -0.4692909 | 1.60E-11   | 0.22591701 | 0.00198778 | -0.007071  |
| EFNA4     | brown | -0.426191  | 1.46E-09   | 0.00038791 | 0.9958188  | -0.0100777 |
| DUOX2     | brown | -0.2501969 | 0.00059305 | -0.1167163 | 0.11361185 | -0.3065463 |
| DPYSL5    | brown | -0.3693851 | 2.29E-07   | 0.01666066 | 0.82190989 | -0.0945913 |
| DPCR1     | brown | -0.28653   | 7.68E-05   | -0.0689076 | 0.35133596 | -0.2750997 |
| DNA2      | brown | -0.4665706 | 2.17E-11   | 0.0893659  | 0.22639746 | 0.02936195 |
| DEFB123   | brown | -0.2874336 | 7.28E-05   | -0.1069274 | 0.14742989 | -0.1737092 |
| DCHS2     | brown | -0.2474807 | 0.0006831  | -0.1123008 | 0.12802875 | -0.3097088 |
| CXCL17    | brown | -0.2121355 | 0.00374516 | -0.1639459 | 0.02575398 | -0.3526835 |
| CTSW      | brown | -0.2492658 | 0.0006226  | -0.1075511 | 0.14506995 | -0.27698   |
| COA3      | brown | -0.2727481 | 0.00017258 | -0.1631017 | 0.02653697 | -0.2385491 |
| CNKSRI    | brown | -0.4087412 | 7.64E-09   | 0.02630941 | 0.72222798 | -0.0653714 |
| CLN6      | brown | -0.2510218 | 0.00056795 | -0.1050274 | 0.15479918 | -0.3199977 |
| CLCN1     | brown | -0.2309328 | 0.00156369 | -0.1338057 | 0.06940204 | -0.3214521 |
| CHRNE     | brown | -0.2736504 | 0.00016389 | -0.0670203 | 0.36471574 | -0.2818945 |
| CHRNA2    | brown | -0.3434451 | 1.70E-06   | 0.01422623 | 0.84758881 | -0.0284914 |
| CHPF      | brown | -0.366612  | 2.86E-07   | -0.1647694 | 0.0250094  | -0.1324985 |
| CEACAM22F | brown | -0.2468416 | 0.00070605 | -0.1145746 | 0.12043783 | -0.3165483 |
| CEACAM19  | brown | -0.2482574 | 0.00065614 | -0.1080692 | 0.14313131 | -0.2691523 |
| CD4       | brown | -0.3474418 | 1.26E-06   | 0.11868993 | 0.10759257 | -0.2858719 |
| CD3EAP    | brown | -0.2889497 | 6.64E-05   | -0.0881264 | 0.23292952 | -0.2367821 |
| CD1C      | brown | -0.2588079 | 0.00037496 | -0.1016441 | 0.16860295 | -0.2831684 |
| CCL8      | brown | -0.3284467 | 5.01E-06   | -0.0232771 | 0.75314192 | -0.1101854 |
| CAMKMT    | brown | -0.4341774 | 6.64E-10   | 0.37708428 | 1.22E-07   | 0.03226586 |
| C3orf35   | brown | -0.2562346 | 0.00043073 | -0.0895933 | 0.22521334 | -0.2656363 |
| C3orf20   | brown | -0.2795837 | 0.00011615 | -0.0536828 | 0.46799812 | -0.2327618 |
| C20orf96  | brown | -0.2472069 | 0.00069284 | -0.0832253 | 0.2600518  | -0.4081698 |
| BCAM      | brown | -0.2695855 | 0.00020657 | -0.0907132 | 0.21944582 | -0.2855402 |
| BACE2-IT1 | brown | -0.1883892 | 0.01022757 | -0.1263788 | 0.08649813 | -0.3038971 |
| ATP1A3    | brown | -0.1551498 | 0.03496626 | -0.2890357 | 6.60E-05   | -0.4147683 |
| ASH1L     | brown | -0.2918041 | 5.57E-05   | -0.0754746 | 0.30722346 | -0.2454091 |
| ARMC6     | brown | -0.3469336 | 1.31E-06   | -0.169305  | 0.02123125 | -0.1668384 |
| ARHGEF40  | brown | -0.3684616 | 2.46E-07   | 0.09154858 | 0.21521224 | -0.2722973 |
| AQP7      | brown | -0.266523  | 0.00024533 | -0.1132028 | 0.12497453 | -0.3230428 |

|          |       |            |            |            |            |            |
|----------|-------|------------|------------|------------|------------|------------|
| AOC2     | brown | -0.2686311 | 0.00021799 | -0.0836321 | 0.25772142 | -0.2556785 |
| ANKRD53  | brown | -0.295936  | 4.32E-05   | -0.092452  | 0.21070021 | -0.2340853 |
| ALPL2    | brown | -0.2677552 | 0.00022898 | -0.0363759 | 0.62301994 | -0.2346679 |
| ALPK3    | brown | -0.2869701 | 7.48E-05   | -0.0910789 | 0.21758491 | -0.265     |
| ALPI     | brown | -0.2769598 | 0.00013538 | -0.0759974 | 0.30387529 | -0.2501882 |
| AGRN     | brown | -0.421979  | 2.20E-09   | -0.0476487 | 0.51953303 | -0.126065  |
| ADAMTS17 | brown | -0.2711109 | 0.00018946 | -0.0751316 | 0.30943389 | -0.2812339 |
| ADAM32   | brown | -0.2055345 | 0.00500593 | -0.1787879 | 0.01489396 | -0.2797062 |
| ACTRT1   | brown | -0.485036  | 2.62E-12   | 0.10973013 | 0.13704945 | 0.00189781 |
| ACPT     | brown | -0.4004092 | 1.63E-08   | 0.01181692 | 0.8731618  | -0.1270057 |
| ACE2     | brown | -0.2627937 | 0.00030165 | -0.1121023 | 0.12870846 | -0.2310276 |
| ZIC2     | green | -0.5487759 | 6.11E-16   | 0.82747401 | 9.61E-48   | 0.2795893  |
| ZC3H12C  | green | -0.396051  | 2.40E-08   | 0.82516322 | 2.90E-47   | 0.47918969 |
| ZAK      | green | -0.3248073 | 6.46E-06   | 0.85282715 | 1.59E-53   | 0.28671848 |
| YAP1     | green | -0.3642398 | 3.45E-07   | 0.87367944 | 3.67E-59   | 0.3959342  |
| WDR54    | green | 0.51604016 | 5.58E-14   | -0.9131661 | 3.02E-73   | -0.4200018 |
| TPD52L1  | green | -0.4911113 | 1.27E-12   | 0.81227325 | 1.03E-44   | 0.07842067 |
| TP53BP2  | green | -0.5402478 | 2.08E-15   | 0.8335785  | 4.79E-49   | 0.42380464 |
| TM4SF18  | green | -0.3283167 | 5.06E-06   | 0.68796154 | 2.84E-27   | 0.14990802 |
| TCF12    | green | -0.3188756 | 9.70E-06   | 0.86487068 | 1.15E-56   | 0.29049839 |
| SWAP70   | green | -0.2978556 | 3.83E-05   | 0.85164741 | 3.12E-53   | 0.04318863 |
| SPAG9    | green | -0.4469497 | 1.80E-10   | 0.87723458 | 3.19E-60   | 0.33869888 |
| SOX9     | green | -0.4960029 | 7.02E-13   | 0.85244348 | 1.98E-53   | 0.29389591 |
| SNTB1    | green | -0.26773   | 0.00022931 | 0.81342376 | 6.23E-45   | 0.30832786 |
| SASH1    | green | -0.381762  | 8.24E-08   | 0.88281572 | 5.89E-62   | 0.13055594 |
| RPS6     | green | -0.3242227 | 6.72E-06   | 0.77488978 | 2.65E-38   | 0.10388622 |
| RIN2     | green | -0.506303  | 1.95E-13   | 0.91040873 | 4.63E-72   | 0.44326219 |
| RHOBTB3  | green | -0.4896212 | 1.52E-12   | 0.82182642 | 1.39E-46   | 0.25774298 |
| RFTN2    | green | -0.4948854 | 8.04E-13   | 0.90344526 | 3.15E-69   | 0.38696993 |
| RANBP3L  | green | -0.3533376 | 8.08E-07   | 0.82428043 | 4.40E-47   | 0.34442936 |
| QKI      | green | -0.4405931 | 3.47E-10   | 0.77805322 | 8.50E-39   | 0.07183466 |
| PTPRB    | green | -0.3067777 | 2.16E-05   | 0.74103027 | 1.76E-33   | 0.25506616 |
| PRRX1    | green | -0.3934215 | 3.03E-08   | 0.8389405  | 3.11E-50   | 0.32313362 |
| PRCP     | green | -0.4518236 | 1.08E-10   | 0.82327245 | 7.07E-47   | 0.30217777 |
| PLSCR4   | green | -0.3367699 | 2.77E-06   | 0.81116735 | 1.68E-44   | 0.11337605 |
| PFKFB3   | green | -0.2355497 | 0.00124814 | 0.44864371 | 1.51E-10   | -0.08997   |
| PELI3    | green | 0.28085799 | 0.00010776 | -0.8203053 | 2.81E-46   | -0.3195356 |
| PDK4     | green | -0.4084524 | 7.85E-09   | 0.77721781 | 1.15E-38   | 0.16234044 |
| PALLD    | green | -0.5068038 | 1.83E-13   | 0.8809438  | 2.30E-61   | 0.48426833 |
| NPL      | green | -0.3077929 | 2.03E-05   | 0.7955556  | 1.11E-41   | 0.13659819 |
| MSRB3    | green | -0.4147383 | 4.38E-09   | 0.88456324 | 1.62E-62   | 0.46005054 |
| MAPRE1   | green | -0.4643667 | 2.78E-11   | 0.9253089  | 5.49E-79   | 0.36319669 |
| LRP4     | green | -0.5827294 | 3.27E-18   | 0.85981023 | 2.61E-55   | 0.25308751 |
| LRFN2    | green | 0.51097028 | 1.07E-13   | -0.8710749 | 2.10E-58   | -0.4929534 |
| LIN7B    | green | 0.49862371 | 5.09E-13   | -0.8844533 | 1.76E-62   | -0.5281781 |
| LEF1     | green | -0.4545799 | 8.04E-11   | 0.86541622 | 8.15E-57   | 0.42030375 |

|          |       |            |            |            |            |            |
|----------|-------|------------|------------|------------|------------|------------|
| KDELC2   | green | -0.3296525 | 4.60E-06   | 0.85486996 | 4.88E-54   | 0.28834413 |
| KAT2B    | green | -0.4353803 | 5.89E-10   | 0.90692807 | 1.29E-70   | 0.28463349 |
| ITGB5    | green | -0.553869  | 2.90E-16   | 0.89229688 | 4.10E-65   | 0.65193163 |
| ITGB1    | green | -0.5792033 | 5.79E-18   | 0.88292856 | 5.42E-62   | 0.53688133 |
| IDH1     | green | -0.2924946 | 5.34E-05   | 0.81256166 | 9.11E-45   | 0.17775898 |
| GNG11    | green | -0.3839305 | 6.86E-08   | 0.81684202 | 1.36E-45   | 0.15937688 |
| GEM      | green | -0.2821123 | 0.00010006 | 0.60598939 | 6.28E-20   | 0.04261611 |
| FMNL2    | green | -0.3431487 | 1.74E-06   | 0.74762923 | 2.32E-34   | 0.1764024  |
| FAM149B1 | green | -0.3262209 | 5.85E-06   | 0.8247336  | 3.56E-47   | 0.32315381 |
| EMX2     | green | -0.5198941 | 3.36E-14   | 0.87827475 | 1.54E-60   | 0.30371727 |
| ELF1     | green | -0.4191609 | 2.88E-09   | 0.90478101 | 9.38E-70   | 0.39534331 |
| DCN      | green | -0.4992542 | 4.71E-13   | 0.83570723 | 1.64E-49   | 0.39772372 |
| CPQ      | green | -0.434689  | 6.31E-10   | 0.91408434 | 1.19E-73   | 0.26322895 |
| CDK2AP1  | green | -0.4553551 | 7.40E-11   | 0.82198743 | 1.29E-46   | 0.28165507 |
| CBFB     | green | -0.399825  | 1.72E-08   | 0.85141773 | 3.55E-53   | 0.16833134 |
| BBOX1    | green | -0.4017356 | 1.45E-08   | 0.81807218 | 7.79E-46   | 0.29240359 |
| BAMBI    | green | -0.369222  | 2.32E-07   | 0.85218639 | 2.29E-53   | 0.21894381 |
| ARHGEF6  | green | -0.4953466 | 7.60E-13   | 0.90660448 | 1.74E-70   | 0.53507552 |
| ANTXR2   | green | -0.4570779 | 6.15E-11   | 0.8334287  | 5.17E-49   | 0.55254263 |
| ANTXR1   | green | -0.3961043 | 2.39E-08   | 0.85816334 | 7.01E-55   | 0.47461133 |
| AMOT     | green | -0.3558725 | 6.65E-07   | 0.83458201 | 2.89E-49   | 0.21506993 |
| ADGRV1   | green | -0.4631417 | 3.18E-11   | 0.77469032 | 2.84E-38   | 0.2834032  |
| ACTL6A   | green | -0.4126249 | 5.33E-09   | 0.88144974 | 1.59E-61   | 0.29802501 |
| ZNF394   | grey  | 0.09463702 | 0.20006867 | -0.0231146 | 0.7548104  | -0.0692406 |
| MOXD1    | grey  | 0.16722485 | 0.02289801 | -0.0622061 | 0.40024994 | -0.2108274 |
| MFF      | grey  | 0.22176713 | 0.00241509 | -0.0081891 | 0.91190915 | -0.1425652 |
| FXR1     | grey  | -0.2290201 | 0.00171456 | 0.51396167 | 7.31E-14   | 0.26819089 |
| F3       | grey  | 0.11077683 | 0.13331951 | 0.16186928 | 0.02771653 | -0.0658911 |
| DIO2     | grey  | -0.0956942 | 0.19506677 | 0.09434816 | 0.20145141 | 0.0822654  |
| AMY1C    | grey  | 0.25375251 | 0.0004917  | -0.2422668 | 0.00089219 | -0.188086  |
| ZDHHC9   | red   | -0.2146807 | 0.00334113 | 0.18000553 | 0.01421411 | 0.46268185 |
| TMEM98   | red   | -0.3712015 | 1.97E-07   | 0.27105905 | 0.00019002 | 0.38015936 |
| TJAP1    | red   | -0.5080725 | 1.56E-13   | 0.38170183 | 8.28E-08   | 0.74092464 |
| THBS2    | red   | -0.2185781 | 0.00279835 | 0.24509766 | 0.00077232 | 0.24798967 |
| SUN2     | red   | -0.4556244 | 7.19E-11   | 0.39104333 | 3.72E-08   | 0.61931562 |
| SOX2-OT  | red   | -0.3843058 | 6.64E-08   | 0.44303372 | 2.70E-10   | 0.44105703 |
| SLC5A11  | red   | -0.3043347 | 2.53E-05   | 0.07638211 | 0.30142706 | 0.29918174 |
| SLC45A3  | red   | -0.240104  | 0.00099505 | 0.0293395  | 0.69177979 | 0.0686874  |
| SLC44A1  | red   | -0.3908618 | 3.78E-08   | 0.48389985 | 3.00E-12   | 0.09393773 |
| SLAIN1   | red   | -0.1891036 | 0.00993867 | 0.33747708 | 2.63E-06   | 0.31832983 |
| SGK1     | red   | -0.2875616 | 7.22E-05   | 0.47916652 | 5.21E-12   | 0.03882627 |
| SEMA6A   | red   | -0.4050195 | 1.07E-08   | 0.32931564 | 4.71E-06   | 0.52153842 |
| SEMA3B   | red   | -0.3518059 | 9.08E-07   | 0.17465759 | 0.01741604 | 0.47661677 |
| S1PR5    | red   | -0.2934908 | 5.02E-05   | 0.01399585 | 0.85002768 | 0.29793267 |
| RTKN     | red   | -0.5329952 | 5.72E-15   | 0.41885993 | 2.96E-09   | 0.66253699 |
| RNF130   | red   | -0.5564371 | 1.98E-16   | 0.70064659 | 1.24E-28   | 0.45465338 |

|          |           |            |            |            |            |            |
|----------|-----------|------------|------------|------------|------------|------------|
| RHOU     | red       | -0.4520828 | 1.05E-10   | 0.49363731 | 9.36E-13   | 0.58032682 |
| RASGRP3  | red       | -0.3070517 | 2.13E-05   | 0.36235405 | 4.01E-07   | 0.48748547 |
| QDPR     | red       | -0.2517139 | 0.00054766 | 0.29880271 | 3.61E-05   | -0.0448886 |
| PPP1R14A | red       | -0.2522222 | 0.00053318 | 0.0023279  | 0.97491204 | 0.36391605 |
| PIEZO2   | red       | -0.4146858 | 4.40E-09   | 0.20192338 | 0.00584611 | 0.56172948 |
| PHLDB1   | red       | -0.5781676 | 6.84E-18   | 0.27810952 | 0.00012661 | 0.6167083  |
| P2RX7    | red       | -0.4123516 | 5.47E-09   | 0.37436966 | 1.52E-07   | 0.12883497 |
| NKX6-2   | red       | -0.4123849 | 5.45E-09   | 0.15094851 | 0.04026957 | 0.31186769 |
| NIPAL3   | red       | -0.3648319 | 3.30E-07   | -0.0670793 | 0.36429306 | 0.42816278 |
| NINJ2    | red       | -0.2230813 | 0.00227152 | 0.08933105 | 0.22657934 | 0.16807582 |
| NDE1     | red       | -0.5093164 | 1.33E-13   | 0.39329073 | 3.06E-08   | 0.79426545 |
| LPAR1    | red       | -0.5147072 | 6.63E-14   | 0.46693261 | 2.09E-11   | 0.47991458 |
| KCNJ2    | red       | -0.379263  | 1.02E-07   | 0.19776255 | 0.00696878 | 0.4670245  |
| ICK      | red       | -0.2591279 | 0.00036851 | 0.47940024 | 5.07E-12   | 0.36267933 |
| HHIP     | red       | -0.2062571 | 0.00485143 | 0.07311484 | 0.32263701 | 0.35984459 |
| GLTP     | red       | -0.4568276 | 6.32E-11   | 0.59408855 | 4.94E-19   | 0.54070464 |
| FRYL     | red       | -0.4106433 | 6.41E-09   | 0.34282766 | 1.78E-06   | 0.64422921 |
| FOXN2    | red       | -0.3307246 | 4.27E-06   | 0.6075717  | 4.75E-20   | 0.48730275 |
| FAM222A  | red       | -0.4614485 | 3.83E-11   | 0.26711598 | 0.00023733 | 0.37572915 |
| FAM107B  | red       | -0.496152  | 6.89E-13   | 0.3592633  | 5.11E-07   | 0.69881101 |
| ERMN     | red       | -0.3232979 | 7.17E-06   | 0.2924587  | 5.35E-05   | 0.30882749 |
| CYB5R2   | red       | -0.2333159 | 0.00139271 | 0.08751413 | 0.23620445 | 0.46212269 |
| CNTN2    | red       | -0.3402223 | 2.16E-06   | 0.1102275  | 0.13526724 | 0.28918947 |
| CNP      | red       | -0.3552577 | 6.97E-07   | 0.17688394 | 0.01601391 | 0.27855043 |
| CLDND1   | red       | -0.3795684 | 9.90E-08   | 0.42977876 | 1.03E-09   | 0.15326016 |
| CLCA4    | red       | -0.2979089 | 3.81E-05   | 0.39255775 | 3.26E-08   | 0.10885367 |
| CAPN3    | red       | -0.3443795 | 1.59E-06   | 0.1016816  | 0.16844499 | 0.15896864 |
| ANLN     | red       | -0.4327745 | 7.64E-10   | 0.54617143 | 8.91E-16   | 0.32106847 |
| AMER2    | red       | -0.5578481 | 1.60E-16   | 0.3438431  | 1.65E-06   | 0.41988918 |
| ADIPOR2  | red       | -0.6220374 | 3.39E-21   | 0.6056163  | 6.71E-20   | 0.5655662  |
| ZYG11B   | turquoise | 0.52223588 | 2.46E-14   | -0.5827289 | 3.27E-18   | -0.4031274 |
| ZWILCH   | turquoise | 0.77271874 | 5.71E-38   | -0.5017156 | 3.47E-13   | -0.645883  |
| ZUFSP    | turquoise | 0.6673383  | 3.32E-25   | -0.3476556 | 1.24E-06   | -0.5564807 |
| ZSWIM8   | turquoise | -0.68106   | 1.46E-26   | 0.39691661 | 2.22E-08   | 0.4281857  |
| ZSWIM7   | turquoise | -0.2353833 | 0.00125841 | 0.18524828 | 0.01158762 | 0.59299035 |
| ZSWIM6   | turquoise | -0.3087404 | 1.90E-05   | 0.71118148 | 8.12E-30   | 0.40171017 |
| ZSWIM4   | turquoise | -0.4107937 | 6.32E-09   | 0.09203811 | 0.2127588  | 0.66925429 |
| ZSCAN32  | turquoise | -0.4367042 | 5.15E-10   | 0.09699919 | 0.18901826 | 0.73299452 |
| ZSCAN18  | turquoise | 0.3244702  | 6.61E-06   | -0.2833039 | 9.32E-05   | -0.8323853 |
| ZRANB2   | turquoise | 0.6366223  | 2.05E-22   | -0.4552029 | 7.52E-11   | -0.6626864 |
| ZP3      | turquoise | -0.3847494 | 6.40E-08   | 0.20689514 | 0.00471858 | 0.68677466 |
| ZNHIT6   | turquoise | -0.4431686 | 2.66E-10   | 0.68159765 | 1.29E-26   | 0.48738168 |
| ZNHIT3   | turquoise | 0.53760815 | 3.01E-15   | -0.2329738 | 0.00141615 | -0.8398651 |
| ZNFX1    | turquoise | -0.4541504 | 8.42E-11   | 0.35171401 | 9.15E-07   | 0.2897031  |
| ZNF91    | turquoise | 0.31014841 | 1.74E-05   | -0.256127  | 0.00043322 | -0.575774  |
| ZNF830   | turquoise | -0.3791587 | 1.02E-07   | 0.19502484 | 0.00780852 | 0.63193451 |

|         |           |            |            |            |            |            |
|---------|-----------|------------|------------|------------|------------|------------|
| ZNF83   | turquoise | 0.0877221  | 0.23508841 | 0.34794372 | 1.22E-06   | -0.3862806 |
| ZNF768  | turquoise | -0.49501   | 7.92E-13   | 0.27012326 | 0.00020038 | 0.43574021 |
| ZNF716  | turquoise | -0.391093  | 3.71E-08   | 0.18461581 | 0.01187998 | 0.79229293 |
| ZNF711  | turquoise | 0.81030973 | 2.43E-44   | -0.3919227 | 3.45E-08   | -0.5460249 |
| ZNF688  | turquoise | -0.4679972 | 1.86E-11   | 0.1944972  | 0.00798033 | 0.79103586 |
| ZNF681  | turquoise | 0.6728389  | 9.69E-26   | -0.3446285 | 1.56E-06   | -0.5712325 |
| ZNF679  | turquoise | 0.50800616 | 1.57E-13   | -0.1036106 | 0.16047244 | -0.6797494 |
| ZNF667  | turquoise | 0.64079926 | 8.93E-23   | -0.4643273 | 2.79E-11   | -0.8017937 |
| ZNF664  | turquoise | -0.2884797 | 6.83E-05   | 0.59039565 | 9.20E-19   | 0.32238638 |
| ZNF653  | turquoise | -0.3144947 | 1.30E-05   | -0.0474932 | 0.52089828 | 0.75436613 |
| ZNF641  | turquoise | -0.4323816 | 7.95E-10   | 0.33454617 | 3.25E-06   | 0.431951   |
| ZNF627  | turquoise | 0.43613774 | 5.45E-10   | -0.1337867 | 0.06944199 | -0.1432598 |
| ZNF621  | turquoise | -0.6412292 | 8.20E-23   | 0.6769782  | 3.77E-26   | 0.79178537 |
| ZNF618  | turquoise | -0.3399306 | 2.20E-06   | 0.33649934 | 2.82E-06   | 0.8096567  |
| ZNF609  | turquoise | -0.6057617 | 6.54E-20   | 0.48000007 | 4.73E-12   | 0.4859475  |
| ZNF597  | turquoise | 0.73707235 | 5.74E-33   | -0.5030109 | 2.95E-13   | -0.6427457 |
| ZNF581  | turquoise | -0.5816247 | 3.91E-18   | 0.27122354 | 0.00018826 | 0.50575931 |
| ZNF565  | turquoise | -0.4908093 | 1.32E-12   | 0.41367862 | 4.83E-09   | 0.56257609 |
| ZNF512  | turquoise | 0.39672216 | 2.26E-08   | -0.0110484 | 0.88134832 | -0.8168885 |
| ZNF511  | turquoise | -0.3341218 | 3.35E-06   | 0.130552   | 0.07651877 | 0.76030889 |
| ZNF480  | turquoise | -0.3756809 | 1.37E-07   | 0.71536855 | 2.65E-30   | 0.67207672 |
| ZNF467  | turquoise | -0.3587065 | 5.34E-07   | 0.505594   | 2.13E-13   | 0.68190515 |
| ZNF444  | turquoise | -0.6067586 | 5.48E-20   | 0.10957278 | 0.13761704 | 0.3643467  |
| ZNF397  | turquoise | -0.4382015 | 4.43E-10   | 0.39561403 | 2.50E-08   | 0.47479751 |
| ZNF395  | turquoise | -0.570049  | 2.47E-17   | 0.75717906 | 1.11E-35   | 0.29726279 |
| ZNF385B | turquoise | 0.59327845 | 5.66E-19   | -0.6257869 | 1.67E-21   | -0.6240114 |
| ZNF366  | turquoise | -0.5286137 | 1.04E-14   | 0.63863846 | 1.38E-22   | 0.27268572 |
| ZNF365  | turquoise | 0.63011872 | 7.29E-22   | -0.7412837 | 1.63E-33   | -0.6754226 |
| ZNF331  | turquoise | 0.67505832 | 5.85E-26   | -0.4380518 | 4.50E-10   | -0.5396845 |
| ZNF329  | turquoise | 0.46744493 | 1.97E-11   | -0.2879349 | 7.06E-05   | -0.7482977 |
| ZNF326  | turquoise | -0.5146258 | 6.70E-14   | 0.46893718 | 1.67E-11   | 0.41455215 |
| ZNF319  | turquoise | -0.4190617 | 2.91E-09   | 0.63789835 | 1.59E-22   | 0.42885834 |
| ZNF296  | turquoise | -0.4551388 | 7.57E-11   | 0.07643532 | 0.30108946 | 0.85041494 |
| ZNF280B | turquoise | 0.43119972 | 8.94E-10   | -0.7124098 | 5.86E-30   | -0.5340845 |
| ZNF25   | turquoise | 0.73064011 | 3.77E-32   | -0.7049599 | 4.13E-29   | -0.6856576 |
| ZNF234  | turquoise | -0.3950154 | 2.63E-08   | 0.20067019 | 0.0061659  | 0.71613548 |
| ZNF233  | turquoise | 0.79131788 | 5.87E-41   | -0.6109197 | 2.61E-20   | -0.5543642 |
| ZNF226  | turquoise | 0.59684363 | 3.09E-19   | -0.3371314 | 2.70E-06   | -0.5285538 |
| ZNF219  | turquoise | -0.6072112 | 5.06E-20   | 0.41698303 | 3.54E-09   | 0.51295804 |
| ZNF215  | turquoise | 0.7638951  | 1.19E-36   | -0.6565773 | 3.44E-24   | -0.5296438 |
| ZNF205  | turquoise | -0.4103422 | 6.59E-09   | 0.08714946 | 0.23817038 | 0.7720592  |
| ZNF189  | turquoise | 0.40849712 | 7.82E-09   | -0.3038331 | 2.62E-05   | -0.6027493 |
| ZNF10   | turquoise | 0.50043153 | 4.07E-13   | -0.1828496 | 0.01273101 | -0.6672958 |
| ZMYND15 | turquoise | -0.2879083 | 7.07E-05   | 0.28733846 | 7.32E-05   | 0.70450309 |
| ZMYM4   | turquoise | 0.66098507 | 1.33E-24   | -0.4490577 | 1.44E-10   | -0.7592477 |
| ZMIZ2   | turquoise | -0.4133971 | 4.96E-09   | 0.24678749 | 0.00070802 | 0.74855316 |

|          |           |            |            |            |            |            |
|----------|-----------|------------|------------|------------|------------|------------|
| ZIC3     | turquoise | -0.3498102 | 1.06E-06   | 0.72024276 | 7.04E-31   | 0.50231679 |
| ZFYVE19  | turquoise | -0.5954887 | 3.89E-19   | 0.22926831 | 0.00169426 | 0.54545518 |
| ZFPM2    | turquoise | 0.50851306 | 1.47E-13   | -0.2955445 | 4.42E-05   | -0.7568754 |
| ZFP36    | turquoise | -0.3157151 | 1.20E-05   | 0.4533548  | 9.16E-11   | 0.15280154 |
| ZFHX2    | turquoise | -0.5172322 | 4.77E-14   | 0.19912937 | 0.00658044 | 0.57975701 |
| ZFAND5   | turquoise | 0.5635599  | 6.74E-17   | -0.3952605 | 2.58E-08   | -0.7802006 |
| ZFAND1   | turquoise | 0.56320116 | 7.12E-17   | -0.2788758 | 0.00012107 | -0.7975503 |
| ZEB2     | turquoise | -0.4760921 | 7.42E-12   | 0.52262316 | 2.34E-14   | 0.39159975 |
| ZDHHC8P1 | turquoise | -0.3634035 | 3.69E-07   | 0.2973707  | 3.95E-05   | 0.68847881 |
| ZDHHC23  | turquoise | 0.66595261 | 4.51E-25   | -0.5796374 | 5.40E-18   | -0.6257891 |
| ZDHHC21  | turquoise | 0.69876119 | 2.00E-28   | -0.3626089 | 3.93E-07   | -0.7183885 |
| ZDHHC17  | turquoise | 0.69731672 | 2.87E-28   | -0.4001325 | 1.67E-08   | -0.7206915 |
| ZDHHC13  | turquoise | 0.72702692 | 1.06E-31   | -0.3799288 | 9.61E-08   | -0.3816135 |
| ZCCHC24  | turquoise | -0.7343242 | 1.29E-32   | 0.61122071 | 2.47E-20   | 0.70820213 |
| ZCCHC17  | turquoise | 0.47236583 | 1.13E-11   | -0.5995241 | 1.95E-19   | -0.5024773 |
| ZCCHC14  | turquoise | -0.3218203 | 7.93E-06   | 0.44030489 | 3.57E-10   | 0.66232936 |
| ZCCHC12  | turquoise | 0.65567447 | 4.16E-24   | -0.6787954 | 2.47E-26   | -0.7873201 |
| ZC3H15   | turquoise | 0.60781466 | 4.54E-20   | -0.2603377 | 0.00034506 | -0.8338386 |
| ZC3H12B  | turquoise | 0.19655876 | 0.00732757 | -0.5680942 | 3.35E-17   | -0.5991153 |
| ZC3H10   | turquoise | -0.4026164 | 1.34E-08   | 0.55227882 | 3.66E-16   | 0.62591437 |
| ZBTB21   | turquoise | 0.51302561 | 8.25E-14   | -0.2873058 | 7.33E-05   | -0.4432987 |
| ZBTB20   | turquoise | -0.7108445 | 8.88E-30   | 0.73950177 | 2.78E-33   | 0.72021868 |
| ZBTB17   | turquoise | -0.43858   | 4.26E-10   | 0.11970125 | 0.10460685 | 0.48090498 |
| ZBTB16   | turquoise | -0.6225347 | 3.09E-21   | 0.17704949 | 0.01591369 | 0.43362425 |
| ZBTB11   | turquoise | 0.71115536 | 8.18E-30   | -0.3773214 | 1.19E-07   | -0.2782121 |
| ZBED9    | turquoise | 0.73313542 | 1.83E-32   | -0.5489674 | 5.95E-16   | -0.6518169 |
| ZBED1    | turquoise | -0.4443496 | 2.36E-10   | 0.31393482 | 1.35E-05   | 0.52877738 |
| YY1      | turquoise | -0.3035303 | 2.67E-05   | 0.53198026 | 6.58E-15   | 0.44251932 |
| YWHAZ    | turquoise | 0.60954566 | 3.34E-20   | -0.5714355 | 1.99E-17   | -0.9210513 |
| YWHAH    | turquoise | 0.64839424 | 1.91E-23   | -0.691633  | 1.17E-27   | -0.696962  |
| YWHAG    | turquoise | 0.71237377 | 5.92E-30   | -0.6113718 | 2.40E-20   | -0.8007873 |
| YWHAB    | turquoise | 0.70336642 | 6.21E-29   | -0.6673594 | 3.31E-25   | -0.7377614 |
| YTHDF2   | turquoise | 0.69920191 | 1.79E-28   | -0.4527786 | 9.74E-11   | -0.7241122 |
| YTHDC2   | turquoise | 0.63748077 | 1.73E-22   | -0.403179  | 1.27E-08   | -0.7964136 |
| YPEL5    | turquoise | 0.62690352 | 1.35E-21   | -0.4999985 | 4.29E-13   | -0.8889277 |
| YPEL2    | turquoise | 0.45937064 | 4.80E-11   | -0.175747  | 0.01671715 | -0.7154255 |
| YIPF6    | turquoise | -0.3620631 | 4.10E-07   | 0.77387279 | 3.80E-38   | 0.34570351 |
| YIPF5    | turquoise | 0.65768428 | 2.71E-24   | -0.3032401 | 2.72E-05   | -0.1706242 |
| YIPF4    | turquoise | 0.41270111 | 5.30E-09   | 0.19197798 | 0.00884776 | -0.5199957 |
| YIF1B    | turquoise | -0.2517916 | 0.00054542 | -0.0655302 | 0.37549934 | 0.68494063 |
| YEATS4   | turquoise | 0.63252959 | 4.57E-22   | -0.230366  | 0.00160708 | -0.773858  |
| YEATS2   | turquoise | 0.41906353 | 2.91E-09   | -0.3270238 | 5.54E-06   | -0.7786418 |
| YBX1     | turquoise | -0.6665642 | 3.94E-25   | 0.74584632 | 4.03E-34   | 0.54106505 |
| YARS2    | turquoise | 0.59951553 | 1.95E-19   | -0.3439111 | 1.64E-06   | -0.8286776 |
| YARS     | turquoise | 0.54254026 | 1.50E-15   | -0.690934  | 1.38E-27   | -0.2017956 |
| YAE1D1   | turquoise | 0.35745778 | 5.88E-07   | 0.00319469 | 0.96557548 | -0.6843756 |

|        |           |            |          |            |            |            |
|--------|-----------|------------|----------|------------|------------|------------|
| XYLT2  | turquoise | -0.3189818 | 9.63E-06 | -0.0138333 | 0.85174981 | 0.79201528 |
| XPC    | turquoise | -0.4862421 | 2.27E-12 | 0.37410586 | 1.56E-07   | 0.23768583 |
| XKR8   | turquoise | -0.6512307 | 1.06E-23 | 0.56097067 | 1.00E-16   | 0.5462578  |
| XKR4   | turquoise | 0.57204985 | 1.81E-17 | -0.6159939 | 1.04E-20   | -0.7103946 |
| XK     | turquoise | 0.69293983 | 8.48E-28 | -0.6894104 | 2.00E-27   | -0.7865941 |
| WWC3   | turquoise | -0.7034683 | 6.05E-29 | 0.64847518 | 1.88E-23   | 0.66214463 |
| WSCD1  | turquoise | -0.5733468 | 1.47E-17 | 0.69160267 | 1.18E-27   | 0.68698347 |
| WSB1   | turquoise | -0.3155884 | 1.21E-05 | 0.1601612  | 0.02942534 | 0.42158314 |
| WRNIP1 | turquoise | 0.41856549 | 3.05E-09 | -0.223433  | 0.00223442 | -0.5036168 |
| WRB    | turquoise | 0.52548413 | 1.59E-14 | -0.119154  | 0.10621434 | -0.8537769 |
| WNT10B | turquoise | 0.43883101 | 4.15E-10 | -0.8029175 | 5.58E-43   | -0.2359141 |
| WDR83  | turquoise | -0.3995801 | 1.76E-08 | 0.09787757 | 0.18502511 | 0.77715213 |
| WDR7   | turquoise | 0.62331792 | 2.66E-21 | -0.679027  | 2.35E-26   | -0.7982906 |
| WDR61  | turquoise | 0.50578111 | 2.08E-13 | -0.3404438 | 2.12E-06   | -0.825534  |
| WDR6   | turquoise | -0.6889856 | 2.22E-27 | 0.3573754  | 5.92E-07   | 0.63651322 |
| WDR59  | turquoise | -0.5365057 | 3.51E-15 | 0.56139828 | 9.37E-17   | 0.22287558 |
| WDR5   | turquoise | -0.3778136 | 1.15E-07 | -0.2458019 | 0.00074489 | 0.41430955 |
| WDR47  | turquoise | 0.59070106 | 8.74E-19 | -0.4127935 | 5.25E-09   | -0.9087099 |
| WDR45  | turquoise | -0.6015372 | 1.37E-19 | 0.47076465 | 1.36E-11   | 0.6244028  |
| WDR37  | turquoise | 0.62548709 | 1.77E-21 | -0.4306917 | 9.40E-10   | -0.6856877 |
| WDR20  | turquoise | -0.470202  | 1.45E-11 | 0.59020443 | 9.50E-19   | 0.60968514 |
| WBP4   | turquoise | 0.5358527  | 3.85E-15 | -0.1940614 | 0.00812477 | -0.8026872 |
| WBP1   | turquoise | -0.4620116 | 3.60E-11 | 0.4882878  | 1.78E-12   | 0.73416632 |
| WASL   | turquoise | 0.64946113 | 1.53E-23 | -0.5250503 | 1.69E-14   | -0.8024811 |
| WASH3P | turquoise | -0.6014651 | 1.39E-19 | 0.24105876 | 0.00094837 | 0.82292341 |
| WASH1  | turquoise | -0.5725627 | 1.67E-17 | 0.3337208  | 3.45E-06   | 0.86215629 |
| WASF2  | turquoise | -0.6402059 | 1.01E-22 | 0.43519231 | 6.00E-10   | 0.48130654 |
| WASF1  | turquoise | 0.72550805 | 1.62E-31 | -0.6419428 | 7.10E-23   | -0.8063444 |
| WAS    | turquoise | -0.5016641 | 3.49E-13 | 0.5489132  | 5.99E-16   | 0.46120472 |
| VWA8   | turquoise | 0.64994549 | 1.38E-23 | -0.1023875 | 0.16549386 | -0.4309138 |
| VTA1   | turquoise | 0.73924585 | 3.00E-33 | -0.5894001 | 1.09E-18   | -0.684933  |
| VSTM2B | turquoise | 0.35972686 | 4.93E-07 | -0.5447963 | 1.09E-15   | -0.7077339 |
| VSTM2A | turquoise | 0.31169794 | 1.57E-05 | -0.408131  | 8.09E-09   | 0.11999779 |
| VSNL1  | turquoise | 0.62606125 | 1.59E-21 | -0.6843748 | 6.69E-27   | -0.6939159 |
| VRK3   | turquoise | -0.4266764 | 1.39E-09 | 0.12839279 | 0.08155914 | 0.68136576 |
| VRK2   | turquoise | -0.37731   | 1.20E-07 | 0.37761612 | 1.17E-07   | 0.60380362 |
| VRK1   | turquoise | 0.69585278 | 4.13E-28 | -0.642379  | 6.50E-23   | -0.5692127 |
| VPS53  | turquoise | 0.4348567  | 6.20E-10 | -0.7258899 | 1.46E-31   | -0.478234  |
| VPS51  | turquoise | -0.292774  | 5.25E-05 | -0.0563071 | 0.44649391 | 0.71597491 |
| VPS50  | turquoise | 0.79944682 | 2.32E-42 | -0.4732006 | 1.03E-11   | -0.663665  |
| VPS4B  | turquoise | 0.44895123 | 1.46E-10 | -0.0871916 | 0.23794238 | -0.7212714 |
| VPS37B | turquoise | -0.5610888 | 9.82E-17 | 0.12818854 | 0.08204945 | 0.7113152  |
| VPS36  | turquoise | 0.71067359 | 9.29E-30 | -0.4352038 | 5.99E-10   | -0.5443842 |
| VPS35  | turquoise | 0.6600059  | 1.65E-24 | -0.4576865 | 5.76E-11   | -0.8112019 |
| VPS33B | turquoise | 0.53433119 | 4.76E-15 | -0.7264811 | 1.23E-31   | -0.4972475 |
| VPS29  | turquoise | 0.49182445 | 1.17E-12 | -0.0468768 | 0.5263284  | -0.8274652 |



|          |           |            |            |            |            |            |
|----------|-----------|------------|------------|------------|------------|------------|
| VPS13A   | turquoise | 0.5061487  | 1.99E-13   | -0.5812338 | 4.17E-18   | -0.3824494 |
| VNN2     | turquoise | -0.3449973 | 1.52E-06   | 0.65306732 | 7.21E-24   | 0.27872432 |
| VLDLR    | turquoise | 0.66265112 | 9.30E-25   | -0.4320462 | 8.21E-10   | -0.7868568 |
| VKORC1L1 | turquoise | 0.4250767  | 1.63E-09   | -0.3103478 | 1.71E-05   | -0.7603468 |
| VKORC1   | turquoise | -0.6704639 | 1.65E-25   | 0.25787766 | 0.0003943  | 0.71837745 |
| VIP      | turquoise | 0.74874787 | 1.64E-34   | -0.5940527 | 4.97E-19   | -0.4559208 |
| VGf      | turquoise | 0.52384025 | 1.99E-14   | -0.721514  | 4.96E-31   | -0.4479243 |
| VEZF1    | turquoise | -0.5703452 | 2.36E-17   | 0.63430024 | 3.24E-22   | 0.71042187 |
| VEGFB    | turquoise | -0.5305439 | 8.02E-15   | 0.67397723 | 7.48E-26   | 0.35300232 |
| VDAC1    | turquoise | 0.52601828 | 1.48E-14   | -0.3700777 | 2.16E-07   | -0.9229685 |
| VCPKMT   | turquoise | 0.72009845 | 7.32E-31   | -0.5241147 | 1.92E-14   | -0.6173076 |
| VCL      | turquoise | -0.3768576 | 1.24E-07   | 0.63500629 | 2.82E-22   | 0.53538935 |
| VCAN     | turquoise | -0.447237  | 1.75E-10   | 0.80556104 | 1.85E-43   | 0.62892914 |
| VBP1     | turquoise | 0.49660396 | 6.52E-13   | -0.0766591 | 0.2996724  | -0.7466709 |
| VAT1L    | turquoise | 0.65555382 | 4.27E-24   | -0.5175377 | 4.58E-14   | -0.7002124 |
| VAT1     | turquoise | -0.7071935 | 2.31E-29   | 0.49287606 | 1.03E-12   | 0.44820279 |
| VASP     | turquoise | -0.4881817 | 1.80E-12   | 0.39789869 | 2.04E-08   | 0.69360515 |
| VASN     | turquoise | -0.6003561 | 1.68E-19   | 0.29643872 | 4.18E-05   | 0.58848749 |
| VASH1    | turquoise | -0.6075099 | 4.80E-20   | 0.35643564 | 6.37E-07   | 0.6857966  |
| VAPA     | turquoise | 0.7582773  | 7.72E-36   | -0.6058806 | 6.40E-20   | -0.4417981 |
| VANGL2   | turquoise | -0.5314461 | 7.08E-15   | 0.5746132  | 1.21E-17   | 0.39966376 |
| VAMP7    | turquoise | 0.56474891 | 5.62E-17   | -0.1361359 | 0.06464442 | -0.7446225 |
| VAMP5    | turquoise | -0.610615  | 2.75E-20   | 0.71496985 | 2.96E-30   | 0.41422951 |
| VAMP3    | turquoise | -0.6533126 | 6.85E-24   | 0.76270538 | 1.78E-36   | 0.40278179 |
| VAMP1    | turquoise | 0.47980124 | 4.84E-12   | -0.6426244 | 6.19E-23   | -0.5759919 |
| UXT      | turquoise | -0.5789587 | 6.02E-18   | 0.75970384 | 4.83E-36   | 0.37046825 |
| UVSSA    | turquoise | -0.2974982 | 3.91E-05   | 0.14136861 | 0.05492876 | 0.69267209 |
| USP46    | turquoise | -0.2290181 | 0.00171473 | 0.44990035 | 1.32E-10   | 0.35974393 |
| USP21    | turquoise | -0.4557739 | 7.08E-11   | 0.25522512 | 0.00045463 | 0.26217287 |
| USP15    | turquoise | 0.63835551 | 1.45E-22   | -0.3565948 | 6.29E-07   | -0.6938664 |
| USP10    | turquoise | 0.37625884 | 1.30E-07   | -0.1181564 | 0.10919434 | -0.8258844 |
| USO1     | turquoise | 0.56236208 | 8.09E-17   | -0.0626229 | 0.39709411 | -0.7036993 |
| USF2     | turquoise | -0.5572929 | 1.74E-16   | 0.24557439 | 0.00075365 | 0.13509249 |
| UQCRQ    | turquoise | 0.36475795 | 3.32E-07   | 0.10219364 | 0.1663005  | -0.6750832 |
| UQCRHL   | turquoise | 0.57387403 | 1.36E-17   | -0.4346186 | 6.35E-10   | -0.5631734 |
| UQCRH    | turquoise | 0.58585689 | 1.96E-18   | -0.3783752 | 1.09E-07   | -0.8643463 |
| UQCRFS1  | turquoise | 0.41436181 | 4.53E-09   | -0.1234142 | 0.09420099 | -0.8629821 |
| UQCRC2   | turquoise | 0.63938419 | 1.19E-22   | -0.3335073 | 3.50E-06   | -0.8404347 |
| UQCRBP1  | turquoise | 0.4723469  | 1.14E-11   | -0.0642286 | 0.38507712 | -0.2959654 |
| UQCC1    | turquoise | 0.64362975 | 5.05E-23   | -0.4466583 | 1.86E-10   | -0.3720108 |
| UPK3BL   | turquoise | -0.282528  | 9.76E-05   | 0.23574189 | 0.00123636 | 0.73459724 |
| UPF3A    | turquoise | -0.3452698 | 1.49E-06   | -0.0006243 | 0.99327078 | 0.68696867 |
| UPF1     | turquoise | -0.645604  | 3.38E-23   | 0.25830522 | 0.0003853  | 0.42239137 |
| UNG      | turquoise | -0.5159244 | 5.66E-14   | 0.8085419  | 5.21E-44   | 0.48755081 |
| UNC93B1  | turquoise | -0.429623  | 1.04E-09   | 0.42716935 | 1.33E-09   | 0.74175196 |
| UNC79    | turquoise | 0.528008   | 1.13E-14   | -0.6828542 | 9.59E-27   | -0.5155272 |

|           |           |            |          |            |            |            |
|-----------|-----------|------------|----------|------------|------------|------------|
| UNC50     | turquoise | 0.30202189 | 2.94E-05 | 0.12834946 | 0.08166297 | -0.7588443 |
| UNC45A    | turquoise | -0.3868075 | 5.37E-08 | 0.24426368 | 0.00080599 | 0.7080932  |
| UNC119B   | turquoise | -0.3649463 | 3.27E-07 | 0.61679866 | 8.95E-21   | 0.38005489 |
| UMAD1     | turquoise | 0.54500471 | 1.05E-15 | -0.2120359 | 0.00376183 | -0.7934232 |
| UIMC1     | turquoise | -0.4357134 | 5.69E-10 | 0.5613276  | 9.47E-17   | 0.72730401 |
| UHRF1BP1L | turquoise | 0.61185087 | 2.20E-20 | -0.3800073 | 9.55E-08   | -0.800855  |
| UHRF1     | turquoise | -0.5577833 | 1.62E-16 | 0.68211416 | 1.14E-26   | 0.47625888 |
| UHMK1     | turquoise | 0.55960231 | 1.23E-16 | -0.299694  | 3.41E-05   | -0.6542444 |
| UGP2      | turquoise | 0.43393808 | 6.80E-10 | -0.0211423 | 0.77514671 | -0.8113266 |
| UFM1      | turquoise | 0.47269555 | 1.09E-11 | 0.02304147 | 0.75556116 | -0.6811672 |
| UCHL5     | turquoise | 0.65657275 | 3.44E-24 | -0.464539  | 2.72E-11   | -0.8281458 |
| UCHL1     | turquoise | 0.57932517 | 5.67E-18 | -0.6102024 | 2.97E-20   | -0.8756569 |
| UBXN1     | turquoise | -0.6264535 | 1.47E-21 | 0.20313015 | 0.00555227 | 0.58771866 |
| UBR3      | turquoise | 0.56171992 | 8.93E-17 | -0.345401  | 1.47E-06   | -0.7002436 |
| UBQLN4    | turquoise | -0.5119425 | 9.49E-14 | 0.18681646 | 0.01088988 | 0.85161964 |
| UBQLN2    | turquoise | 0.64093714 | 8.69E-23 | -0.6991469 | 1.81E-28   | -0.6877162 |
| UBQLN1    | turquoise | 0.66983284 | 1.91E-25 | -0.6058997 | 6.38E-20   | -0.7566039 |
| UBLCP1    | turquoise | 0.77884979 | 6.36E-39 | -0.5589468 | 1.36E-16   | -0.418831  |
| UBL5      | turquoise | 0.43843287 | 4.33E-10 | -0.0556955 | 0.4514554  | -0.3459128 |
| UBL3      | turquoise | 0.55019704 | 4.97E-16 | -0.1834818 | 0.01242046 | -0.6683382 |
| UBE4A     | turquoise | 0.625113   | 1.90E-21 | -0.1248799 | 0.09032727 | -0.2925703 |
| UBE3C     | turquoise | 0.46851362 | 1.75E-11 | -0.0699713 | 0.34393301 | -0.6159439 |
| UBE2V2    | turquoise | 0.71764011 | 1.43E-30 | -0.5914948 | 7.65E-19   | -0.7124253 |
| UBE2T     | turquoise | 0.69087939 | 1.40E-27 | -0.6012265 | 1.45E-19   | -0.7526864 |
| UBE2N     | turquoise | 0.75322315 | 3.97E-35 | -0.7106962 | 9.23E-30   | -0.6777819 |
| UBE2M     | turquoise | -0.4556768 | 7.15E-11 | 0.16808021 | 0.02219947 | 0.79512176 |
| UBE2L6    | turquoise | -0.58016   | 4.96E-18 | 0.51929226 | 3.64E-14   | 0.64194718 |
| UBE2K     | turquoise | 0.56970485 | 2.61E-17 | -0.309576  | 1.80E-05   | -0.8741552 |
| UBE2E3    | turquoise | 0.4791464  | 5.22E-12 | -0.2253003 | 0.00204659 | -0.8978825 |
| UBE2E2    | turquoise | 0.56781724 | 3.50E-17 | -0.723305  | 3.01E-31   | -0.6255728 |
| UBE2D2    | turquoise | 0.73198081 | 2.56E-32 | -0.6872834 | 3.35E-27   | -0.5011236 |
| UBB       | turquoise | 0.36510742 | 3.22E-07 | 0.0128058  | 0.86264807 | -0.7521457 |
| UBASH3B   | turquoise | 0.66302962 | 8.56E-25 | -0.7415267 | 1.51E-33   | -0.1444978 |
| UBA6      | turquoise | 0.58684485 | 1.66E-18 | -0.1102843 | 0.13506498 | -0.1263965 |
| UBA5      | turquoise | 0.60957029 | 3.32E-20 | -0.2416671 | 0.00091968 | -0.7935257 |
| TYRP1     | turquoise | 0.62473204 | 2.04E-21 | -0.4224311 | 2.11E-09   | -0.4469573 |
| TYMP      | turquoise | -0.3297845 | 4.56E-06 | 0.07736726 | 0.29521675 | 0.39899621 |
| TXNL1     | turquoise | 0.66921777 | 2.19E-25 | -0.2562213 | 0.00043103 | -0.5620576 |
| TXNIP     | turquoise | -0.5016482 | 3.50E-13 | 0.69882164 | 1.97E-28   | 0.54023242 |
| TXNDC9    | turquoise | 0.78254093 | 1.64E-39 | -0.4368057 | 5.10E-10   | -0.4773856 |
| TXNDC16   | turquoise | 0.49757196 | 5.79E-13 | -0.3525134 | 8.61E-07   | -0.8016456 |
| TXN2      | turquoise | -0.3501887 | 1.03E-06 | 0.06194609 | 0.40222613 | 0.77435561 |
| TXN       | turquoise | 0.4001226  | 1.67E-08 | -0.0908924 | 0.21853229 | -0.8533354 |
| TUSC3     | turquoise | 0.64326263 | 5.44E-23 | -0.4786588 | 5.52E-12   | -0.8824189 |
| TUSC2     | turquoise | 0.43545523 | 5.84E-10 | -0.7300449 | 4.47E-32   | -0.650429  |
| TUFT1     | turquoise | 0.64016825 | 1.01E-22 | -0.6112492 | 2.46E-20   | -0.4770013 |

|         |           |            |            |            |            |            |
|---------|-----------|------------|------------|------------|------------|------------|
| TUBGCP6 | turquoise | -0.4577462 | 5.72E-11   | -0.0696848 | 0.34591733 | 0.42398429 |
| TUBGCP5 | turquoise | 0.64085168 | 8.84E-23   | -0.4617879 | 3.69E-11   | -0.5254261 |
| TUBG1   | turquoise | 0.30598619 | 2.28E-05   | -0.5094992 | 1.30E-13   | -0.096342  |
| TUBE1   | turquoise | 0.58003347 | 5.06E-18   | -0.127985  | 0.08254037 | -0.5820247 |
| TUBB6   | turquoise | -0.363774  | 3.58E-07   | 0.62207785 | 3.36E-21   | 0.20601458 |
| TUBB4B  | turquoise | 0.23229758 | 0.00146356 | -0.5836215 | 2.82E-18   | -0.6931093 |
| TUBB3   | turquoise | 0.52522814 | 1.65E-14   | -0.7908996 | 6.90E-41   | -0.5639533 |
| TUBB2A  | turquoise | 0.57880414 | 6.17E-18   | -0.7083316 | 1.72E-29   | -0.708827  |
| TUBB    | turquoise | 0.4318493  | 8.38E-10   | -0.3554329 | 6.88E-07   | -0.3025755 |
| TUBA4A  | turquoise | 0.60302216 | 1.06E-19   | -0.7940523 | 2.01E-41   | -0.286514  |
| TUBA1B  | turquoise | 0.26072048 | 0.00033793 | -0.5467131 | 8.24E-16   | -0.5975683 |
| TUBA1A  | turquoise | 0.5051725  | 2.25E-13   | -0.6163608 | 9.70E-21   | -0.7997411 |
| TTYH1   | turquoise | -0.6054433 | 6.92E-20   | 0.37286726 | 1.72E-07   | 0.44631294 |
| TTLL7   | turquoise | 0.38471657 | 6.42E-08   | -0.1577918 | 0.03194398 | -0.7733189 |
| TTC9    | turquoise | 0.66633896 | 4.14E-25   | -0.5796962 | 5.34E-18   | -0.7877026 |
| TTC38   | turquoise | -0.6810825 | 1.45E-26   | 0.61820715 | 6.90E-21   | 0.73599253 |
| TTC37   | turquoise | 0.48316927 | 3.27E-12   | -0.1812721 | 0.01353594 | -0.7078805 |
| TTC33   | turquoise | 0.76254419 | 1.88E-36   | -0.2934981 | 5.02E-05   | -0.6438289 |
| TTC32   | turquoise | -0.472613  | 1.10E-11   | 0.39282401 | 3.19E-08   | 0.61463106 |
| TTC31   | turquoise | -0.4989023 | 4.91E-13   | 0.55878277 | 1.39E-16   | 0.3655448  |
| TTC19   | turquoise | 0.62185326 | 3.51E-21   | -0.4319864 | 8.26E-10   | -0.7887492 |
| TTC17   | turquoise | -0.3825796 | 7.69E-08   | 0.07759232 | 0.29381003 | 0.51395945 |
| TTC14   | turquoise | -0.3097563 | 1.78E-05   | 0.09269022 | 0.20952173 | 0.5477646  |
| TSTD1   | turquoise | 0.57641911 | 9.05E-18   | -0.3474198 | 1.27E-06   | -0.7407133 |
| TST     | turquoise | -0.3607653 | 4.54E-07   | 0.36501342 | 3.25E-07   | 0.70002523 |
| TSPYL5  | turquoise | 0.76019433 | 4.11E-36   | -0.6451815 | 3.68E-23   | -0.7293485 |
| TSPYL1  | turquoise | 0.64998759 | 1.37E-23   | -0.567393  | 3.74E-17   | -0.8706221 |
| TSPO    | turquoise | -0.5866898 | 1.70E-18   | 0.64391966 | 4.76E-23   | 0.80100291 |
| TSPAN9  | turquoise | -0.3515309 | 9.27E-07   | 0.19044435 | 0.00941583 | 0.78092725 |
| TSPAN18 | turquoise | -0.3262511 | 5.84E-06   | 0.21260288 | 0.00366782 | 0.84649178 |
| TSPAN17 | turquoise | -0.3572496 | 5.98E-07   | 0.12624138 | 0.08684368 | 0.79878223 |
| TSPAN13 | turquoise | 0.64752107 | 2.28E-23   | -0.5401023 | 2.12E-15   | -0.8678045 |
| TSPAN1  | turquoise | 0.63963465 | 1.13E-22   | -0.5417642 | 1.68E-15   | -0.5352771 |
| TSNAX   | turquoise | 0.59845977 | 2.34E-19   | -0.28262   | 9.71E-05   | -0.7642266 |
| TSG101  | turquoise | 0.31446725 | 1.30E-05   | 0.04927564 | 0.50535783 | -0.7986935 |
| TSEN2   | turquoise | 0.55543101 | 2.30E-16   | -0.1548634 | 0.03530798 | -0.6258912 |
| TSC22D2 | turquoise | 0.29787257 | 3.82E-05   | -0.1232523 | 0.0946371  | -0.2657502 |
| TRPC1   | turquoise | 0.56357846 | 6.72E-17   | -0.6205504 | 4.47E-21   | -0.1810785 |
| TRO     | turquoise | 0.55308084 | 3.25E-16   | -0.6114121 | 2.39E-20   | -0.4263304 |
| TRNT1   | turquoise | 0.60201319 | 1.26E-19   | -0.3129565 | 1.44E-05   | -0.7464744 |
| TRMT61B | turquoise | 0.70868463 | 1.57E-29   | -0.3790217 | 1.04E-07   | -0.6905358 |
| TRMT61A | turquoise | -0.511974  | 9.45E-14   | -0.0355839 | 0.63061196 | 0.56408138 |
| TRMT10C | turquoise | 0.77908292 | 5.85E-39   | -0.4480001 | 1.61E-10   | -0.7399728 |
| TRMT1   | turquoise | -0.4737781 | 9.67E-12   | 0.09948903 | 0.17786088 | 0.87521646 |
| TRIQK   | turquoise | 0.51626506 | 5.41E-14   | -0.2848942 | 8.48E-05   | -0.8076229 |
| TRIP6   | turquoise | -0.661423  | 1.21E-24   | 0.64945732 | 1.53E-23   | 0.51903044 |

|          |           |            |          |            |            |            |
|----------|-----------|------------|----------|------------|------------|------------|
| TRIP13   | turquoise | 0.62522267 | 1.86E-21 | -0.6578749 | 2.61E-24   | -0.4492696 |
| TRIP10   | turquoise | -0.5765404 | 8.87E-18 | 0.55993199 | 1.17E-16   | 0.40128994 |
| TRIOBP   | turquoise | -0.6939068 | 6.69E-28 | 0.46596778 | 2.33E-11   | 0.47244984 |
| TRIM9    | turquoise | 0.59432088 | 4.75E-19 | -0.6013909 | 1.41E-19   | -0.7169934 |
| TRIM8    | turquoise | -0.3673819 | 2.69E-07 | 0.4137039  | 4.82E-09   | 0.20325261 |
| TRIM59   | turquoise | -0.3275442 | 5.34E-06 | 0.06109997 | 0.40869694 | 0.62067503 |
| TRIM56   | turquoise | -0.6633889 | 7.92E-25 | 0.66087508 | 1.37E-24   | 0.74025774 |
| TRIM51   | turquoise | 0.30469932 | 2.48E-05 | -0.6187084 | 6.29E-21   | -0.544784  |
| TRIM48   | turquoise | 0.3143873  | 1.31E-05 | -0.5949538 | 4.26E-19   | -0.6140976 |
| TRIM47   | turquoise | -0.5842835 | 2.53E-18 | 0.36401208 | 3.52E-07   | 0.12657845 |
| TRIM41   | turquoise | -0.6803035 | 1.74E-26 | 0.27434618 | 0.00015747 | 0.46862223 |
| TRIM39   | turquoise | -0.4909684 | 1.29E-12 | 0.354367   | 7.47E-07   | 0.7453742  |
| TRIM37   | turquoise | 0.66833352 | 2.66E-25 | -0.5876297 | 1.46E-18   | -0.8374747 |
| TRIM36   | turquoise | 0.74844679 | 1.80E-34 | -0.7019922 | 8.83E-29   | -0.4916406 |
| TRIM33   | turquoise | 0.58054544 | 4.66E-18 | -0.4852269 | 2.56E-12   | -0.6872729 |
| TRIM23   | turquoise | 0.48304564 | 3.31E-12 | -0.2231492 | 0.00226431 | -0.7869504 |
| TRIM2    | turquoise | 0.58749083 | 1.49E-18 | -0.3336963 | 3.45E-06   | -0.4184378 |
| TRIL     | turquoise | -0.3523463 | 8.72E-07 | 0.40312235 | 1.28E-08   | 0.45763418 |
| TRIB2    | turquoise | -0.4123742 | 5.46E-09 | 0.3393332  | 2.30E-06   | 0.74847739 |
| TRAPPC6B | turquoise | 0.50460855 | 2.41E-13 | -0.6755328 | 5.25E-26   | -0.2287709 |
| TRAPPC4  | turquoise | 0.43948494 | 3.89E-10 | -0.2687538 | 0.00021649 | -0.6144417 |
| TRAPPC13 | turquoise | 0.62377448 | 2.44E-21 | -0.3298387 | 4.54E-06   | -0.8163302 |
| TRAPPC11 | turquoise | 0.68704918 | 3.54E-27 | -0.2812669 | 0.00010519 | -0.5697774 |
| TRAF1    | turquoise | -0.493508  | 9.51E-13 | 0.33018839 | 4.43E-06   | 0.71232309 |
| TPST2    | turquoise | -0.3908852 | 3.78E-08 | 0.45707726 | 6.15E-11   | 0.64373914 |
| TPRG1L   | turquoise | 0.52462413 | 1.79E-14 | -0.6817866 | 1.23E-26   | -0.0855629 |
| TPPP3    | turquoise | -0.3714436 | 1.94E-07 | 0.15987024 | 0.02972521 | 0.32316402 |
| TPM2     | turquoise | -0.6683305 | 2.66E-25 | 0.60896142 | 3.70E-20   | 0.64346936 |
| TPM1     | turquoise | 0.63275145 | 4.38E-22 | -0.7280364 | 7.94E-32   | -0.456095  |
| TPGS2    | turquoise | 0.33213597 | 3.86E-06 | -0.2576362 | 0.00039947 | -0.7909717 |
| TPD52L2  | turquoise | -0.5123757 | 8.97E-14 | 0.29735561 | 3.95E-05   | 0.83588166 |
| TP53INP1 | turquoise | -0.4220363 | 2.19E-09 | 0.73219264 | 2.40E-32   | 0.73699399 |
| TP53BP1  | turquoise | 0.34678262 | 1.33E-06 | -0.1332143 | 0.07065394 | -0.8124782 |
| TOX3     | turquoise | 0.66044858 | 1.50E-24 | -0.3796708 | 9.82E-08   | -0.6725119 |
| TOX2     | turquoise | 0.50063782 | 3.96E-13 | -0.6917878 | 1.12E-27   | -0.2362427 |
| TOX      | turquoise | 0.67057113 | 1.62E-25 | -0.6872766 | 3.35E-27   | -0.3324993 |
| TOR1A    | turquoise | 0.57409487 | 1.31E-17 | -0.4280303 | 1.22E-09   | -0.866517  |
| TOPBP1   | turquoise | 0.70417807 | 5.05E-29 | -0.4690223 | 1.65E-11   | -0.4513124 |
| TOP3B    | turquoise | -0.6040409 | 8.86E-20 | 0.4163753  | 3.75E-09   | 0.56586352 |
| TOP2B    | turquoise | 0.37892988 | 1.04E-07 | 0.00063924 | 0.99310979 | -0.7865949 |
| TOP1MT   | turquoise | -0.3855699 | 5.97E-08 | 0.11116237 | 0.13196545 | 0.69290663 |
| TOMM70   | turquoise | 0.68392488 | 7.44E-27 | -0.7320889 | 2.48E-32   | -0.7343797 |
| TOMM5    | turquoise | 0.49587386 | 7.13E-13 | -0.1008482 | 0.17197921 | -0.6429706 |
| TOMM34   | turquoise | 0.30890525 | 1.88E-05 | -0.6091085 | 3.61E-20   | 0.01383402 |
| TOMM20   | turquoise | 0.66267585 | 9.25E-25 | -0.7279769 | 8.07E-32   | -0.7503084 |
| TOB1     | turquoise | -0.6021871 | 1.23E-19 | 0.61188336 | 2.19E-20   | 0.52473015 |

|           |           |            |            |            |            |            |
|-----------|-----------|------------|------------|------------|------------|------------|
| TNS3      | turquoise | -0.5666915 | 4.17E-17   | 0.78791074 | 2.18E-40   | 0.58077958 |
| TNS1      | turquoise | -0.6475281 | 2.28E-23   | 0.65594599 | 3.93E-24   | 0.69527866 |
| TNRC6C    | turquoise | -0.4790079 | 5.30E-12   | 0.49693452 | 6.26E-13   | 0.69558856 |
| TNRC6B    | turquoise | -0.5558972 | 2.14E-16   | 0.21886344 | 0.00276194 | 0.75400014 |
| TNPO3     | turquoise | -0.3891244 | 4.40E-08   | -0.0639686 | 0.38700788 | 0.70588464 |
| TNK2      | turquoise | -0.6743104 | 6.93E-26   | 0.23595575 | 0.00122338 | 0.36784441 |
| TNIP1     | turquoise | -0.4228748 | 2.02E-09   | 0.31775947 | 1.05E-05   | 0.82046797 |
| TNFSF12   | turquoise | -0.4877579 | 1.90E-12   | 0.50883136 | 1.41E-13   | 0.77635666 |
| TNFRSF21  | turquoise | 0.51152534 | 1.00E-13   | -0.7235044 | 2.85E-31   | -0.5707983 |
| TNFRSF1B  | turquoise | -0.4680191 | 1.85E-11   | 0.54512215 | 1.04E-15   | 0.69329185 |
| TNFRSF1A  | turquoise | -0.6662231 | 4.25E-25   | 0.58748481 | 1.49E-18   | 0.52467022 |
| TNFRSF10B | turquoise | -0.5237313 | 2.02E-14   | 0.67612996 | 4.58E-26   | 0.77544242 |
| TMX4      | turquoise | 0.49778368 | 5.64E-13   | -0.386718  | 5.41E-08   | -0.5802371 |
| TMX3      | turquoise | 0.65363746 | 6.40E-24   | -0.350963  | 9.68E-07   | -0.8442828 |
| TMTC1     | turquoise | 0.35665841 | 6.26E-07   | -0.0130207 | 0.86036619 | -0.7469898 |
| TMSB10    | turquoise | 0.55295648 | 3.31E-16   | -0.5625371 | 7.88E-17   | -0.6248108 |
| TMPRSS5   | turquoise | -0.4850369 | 2.62E-12   | 0.36616481 | 2.96E-07   | 0.50574229 |
| TMOD2     | turquoise | 0.57507256 | 1.12E-17   | -0.1886593 | 0.01011747 | -0.6935731 |
| TMOD1     | turquoise | 0.59646038 | 3.30E-19   | -0.476799  | 6.84E-12   | -0.6238394 |
| TMIGD3    | turquoise | -0.3491297 | 1.11E-06   | 0.45209548 | 1.05E-10   | 0.24881865 |
| TMEM97    | turquoise | 0.58921585 | 1.12E-18   | -0.6156914 | 1.10E-20   | -0.3027634 |
| TMEM60    | turquoise | 0.58978029 | 1.02E-18   | -0.2053542 | 0.00504517 | -0.5887768 |
| TMEM59L   | turquoise | 0.25450723 | 0.00047237 | -0.7713301 | 9.30E-38   | -0.1922197 |
| TMEM59    | turquoise | 0.34755108 | 1.25E-06   | -0.0001397 | 0.99849467 | -0.6375327 |
| TMEM56    | turquoise | 0.41593779 | 3.91E-09   | -0.0126789 | 0.8639956  | -0.5742247 |
| TMEM55A   | turquoise | 0.51059011 | 1.13E-13   | -0.1957119 | 0.00758974 | -0.7816613 |
| TMEM47    | turquoise | -0.2054734 | 0.00501919 | 0.6311782  | 5.94E-22   | 0.60888629 |
| TMEM35A   | turquoise | 0.69532083 | 4.72E-28   | -0.5425174 | 1.51E-15   | -0.7904192 |
| TMEM30A   | turquoise | 0.46643667 | 2.21E-11   | -0.4573356 | 5.98E-11   | -0.150758  |
| TMEM259   | turquoise | -0.6096267 | 3.29E-20   | 0.027879   | 0.70639768 | 0.60394727 |
| TMEM246   | turquoise | 0.68775682 | 2.99E-27   | -0.654262  | 5.61E-24   | -0.7083212 |
| TMEM245   | turquoise | 0.54008339 | 2.13E-15   | -0.2658833 | 0.00025423 | -0.7289492 |
| TMEM237   | turquoise | 0.61887074 | 6.11E-21   | -0.2757779 | 0.00014498 | -0.7149107 |
| TMEM230   | turquoise | 0.40686341 | 9.08E-09   | 0.06826892 | 0.35582909 | -0.7482699 |
| TMEM219   | turquoise | -0.7006657 | 1.24E-28   | 0.41763476 | 3.33E-09   | 0.64505112 |
| TMEM209   | turquoise | 0.42754876 | 1.28E-09   | -0.013531  | 0.85495327 | -0.6300326 |
| TMEM207   | turquoise | -0.4834283 | 3.17E-12   | 0.30364361 | 2.65E-05   | 0.72643138 |
| TMEM204   | turquoise | -0.5077514 | 1.62E-13   | 0.64013657 | 1.02E-22   | 0.46355513 |
| TMEM200A  | turquoise | 0.76232743 | 2.02E-36   | -0.5696624 | 2.63E-17   | -0.4838388 |
| TMEM19    | turquoise | 0.46573634 | 2.39E-11   | 0.03764785 | 0.61090931 | -0.7466293 |
| TMEM183B  | turquoise | 0.45324957 | 9.27E-11   | -0.2651928 | 0.00026419 | -0.6271039 |
| TMEM183A  | turquoise | 0.47114028 | 1.30E-11   | -0.2428112 | 0.00086788 | -0.6025498 |
| TMEM179B  | turquoise | -0.7096469 | 1.22E-29   | 0.52450127 | 1.82E-14   | 0.45449734 |
| TMEM178A  | turquoise | 0.56811622 | 3.34E-17   | -0.7222194 | 4.08E-31   | -0.478607  |
| TMEM177   | turquoise | 0.45501716 | 7.67E-11   | -0.6286222 | 9.73E-22   | -0.5929267 |
| TMEM176A  | turquoise | -0.5793895 | 5.62E-18   | 0.49931005 | 4.67E-13   | 0.64192515 |

|          |           |            |            |            |            |            |
|----------|-----------|------------|------------|------------|------------|------------|
| TMEM17   | turquoise | 0.7174405  | 1.51E-30   | -0.4326991 | 7.70E-10   | -0.7284333 |
| TMEM169  | turquoise | 0.68081396 | 1.55E-26   | -0.6601756 | 1.59E-24   | -0.3131343 |
| TMEM163  | turquoise | 0.43324662 | 7.29E-10   | -0.4692541 | 1.61E-11   | -0.7579996 |
| TMEM158  | turquoise | 0.37380009 | 1.60E-07   | -0.5241219 | 1.91E-14   | -0.2703831 |
| TMEM155  | turquoise | 0.69859098 | 2.09E-28   | -0.6816707 | 1.27E-26   | -0.7419047 |
| TMEM14B  | turquoise | 0.55694628 | 1.83E-16   | -0.1568616 | 0.0329817  | -0.6994203 |
| TMEM14A  | turquoise | 0.61910867 | 5.84E-21   | -0.3311979 | 4.13E-06   | -0.8900426 |
| TMEM132D | turquoise | 0.59891472 | 2.16E-19   | -0.8017633 | 8.98E-43   | -0.5452304 |
| TMEM132B | turquoise | 0.42829099 | 1.19E-09   | -0.1154973 | 0.11745897 | -0.52861   |
| TMEM130  | turquoise | 0.47157904 | 1.24E-11   | -0.8711596 | 1.98E-58   | -0.4974259 |
| TMEM129  | turquoise | -0.4127936 | 5.25E-09   | 0.17799457 | 0.01535199 | 0.67918029 |
| TMEM128  | turquoise | 0.62246599 | 3.13E-21   | -0.1919704 | 0.00885049 | -0.3038681 |
| TMEM126B | turquoise | 0.44334621 | 2.62E-10   | 0.11015674 | 0.13551969 | -0.6666553 |
| TMEM126A | turquoise | 0.44008694 | 3.66E-10   | -0.0395084 | 0.59338415 | -0.7693025 |
| TMEM120A | turquoise | -0.6081424 | 4.29E-20   | 0.27270851 | 0.00017297 | 0.74353833 |
| TMEM119  | turquoise | -0.4977803 | 5.64E-13   | 0.56604455 | 4.61E-17   | 0.14504096 |
| TMEM106B | turquoise | 0.46110543 | 3.97E-11   | -0.0244157 | 0.74148448 | -0.7774448 |
| TMEFF2   | turquoise | 0.50587454 | 2.06E-13   | -0.6013434 | 1.42E-19   | -0.4954266 |
| TMEFF1   | turquoise | 0.77432166 | 3.24E-38   | -0.4553094 | 7.44E-11   | -0.5872138 |
| TMED7    | turquoise | 0.28329322 | 9.33E-05   | 0.21853302 | 0.00280415 | -0.7568952 |
| TMED5    | turquoise | 0.16916037 | 0.02134368 | 0.38157573 | 8.37E-08   | -0.5959472 |
| TMED2    | turquoise | 0.52935827 | 9.43E-15   | 0.00557565 | 0.93995725 | -0.7200638 |
| TMCC3    | turquoise | -0.4501967 | 1.28E-10   | 0.42594567 | 1.50E-09   | 0.55581489 |
| TMCC2    | turquoise | -0.4632051 | 3.16E-11   | 0.07909216 | 0.28454925 | 0.32015534 |
| TMC6     | turquoise | -0.5468343 | 8.10E-16   | 0.27140669 | 0.0001863  | 0.66622589 |
| TMBIM1   | turquoise | -0.6182334 | 6.87E-21   | 0.61381248 | 1.54E-20   | 0.55226381 |
| TM9SF2   | turquoise | 0.53673245 | 3.40E-15   | -0.0784599 | 0.28842907 | -0.7967204 |
| TM2D3    | turquoise | 0.67865851 | 2.55E-26   | -0.7019861 | 8.84E-29   | -0.7649203 |
| TM2D2    | turquoise | 0.57988034 | 5.19E-18   | -0.4513343 | 1.14E-10   | -0.8559762 |
| TM2D1    | turquoise | 0.5203973  | 3.14E-14   | -0.1729172 | 0.01858534 | -0.3193647 |
| TLR5     | turquoise | -0.4160419 | 3.87E-09   | 0.65544241 | 4.37E-24   | 0.55043001 |
| TLN2     | turquoise | 0.45859274 | 5.22E-11   | -0.884664  | 1.50E-62   | -0.3702911 |
| TLL2     | turquoise | 0.66131873 | 1.24E-24   | -0.6369606 | 1.92E-22   | -0.746951  |
| TLE2     | turquoise | -0.5527103 | 3.44E-16   | 0.2027033  | 0.00565466 | 0.77398372 |
| TLE1     | turquoise | -0.4341228 | 6.68E-10   | 0.54942707 | 5.56E-16   | 0.70858451 |
| TJP2     | turquoise | -0.4058471 | 9.97E-09   | 0.68036998 | 1.72E-26   | 0.08248037 |
| TJP1     | turquoise | -0.5177333 | 4.47E-14   | 0.83831136 | 4.31E-50   | 0.38490595 |
| TIPRL    | turquoise | 0.59393282 | 5.07E-19   | -0.510873  | 1.09E-13   | -0.1116953 |
| TIMP1    | turquoise | -0.580116  | 4.99E-18   | 0.41281012 | 5.24E-09   | 0.45921679 |
| TIMM9    | turquoise | 0.47803297 | 5.94E-12   | -0.1594502 | 0.03016266 | -0.72344   |
| TIMM8A   | turquoise | 0.65419528 | 5.69E-24   | -0.320405  | 8.74E-06   | -0.2189478 |
| TIMM23   | turquoise | 0.55000165 | 5.11E-16   | -0.5065142 | 1.90E-13   | -0.8167938 |
| TIMM22   | turquoise | -0.2961525 | 4.26E-05   | 0.07154303 | 0.33317644 | 0.78792878 |
| TIMM10B  | turquoise | -0.329755  | 4.57E-06   | -0.0432309 | 0.5590245  | 0.68321686 |
| TIAM2    | turquoise | 0.41506558 | 4.24E-09   | -0.6223591 | 3.19E-21   | -0.4130307 |
| TIAL1    | turquoise | -0.5141233 | 7.16E-14   | 0.50813586 | 1.54E-13   | 0.25003242 |

|          |           |            |            |            |            |            |
|----------|-----------|------------|------------|------------|------------|------------|
| TIA1     | turquoise | 0.30621006 | 2.25E-05   | 0.12525276 | 0.08936229 | -0.6525708 |
| THYN1    | turquoise | 0.55469517 | 2.56E-16   | -0.4118883 | 5.71E-09   | -0.9057389 |
| THUMPD1  | turquoise | 0.75589537 | 1.68E-35   | -0.2645636 | 0.00027357 | -0.4772633 |
| THOP1    | turquoise | -0.3816457 | 8.32E-08   | -0.267288  | 0.00023506 | 0.59169589 |
| THOC7    | turquoise | 0.50945691 | 1.30E-13   | -0.2299137 | 0.0016425  | -0.8581317 |
| THOC3    | turquoise | 0.55634211 | 2.01E-16   | -0.6277808 | 1.14E-21   | -0.5728962 |
| THOC2    | turquoise | -0.4263843 | 1.43E-09   | 0.30452012 | 2.50E-05   | 0.81781759 |
| THNSL1   | turquoise | 0.72549235 | 1.63E-31   | -0.5830903 | 3.08E-18   | -0.7380062 |
| THEMIS   | turquoise | 0.61068449 | 2.72E-20   | -0.4715143 | 1.25E-11   | -0.6101474 |
| THAP10   | turquoise | 0.56612734 | 4.55E-17   | -0.4251848 | 1.61E-09   | -0.652318  |
| TGIF1    | turquoise | -0.5150356 | 6.36E-14   | 0.79901061 | 2.77E-42   | 0.3612406  |
| TGFBI    | turquoise | -0.2333024 | 0.00139362 | 0.55651652 | 1.95E-16   | 0.05038889 |
| TGFB3    | turquoise | -0.668628  | 2.49E-25   | 0.46604752 | 2.30E-11   | 0.58934425 |
| TGFB1I1  | turquoise | -0.5294438 | 9.32E-15   | 0.56822816 | 3.28E-17   | 0.74450201 |
| TFPI     | turquoise | -0.4234809 | 1.90E-09   | 0.63159093 | 5.49E-22   | 0.53784835 |
| TFG      | turquoise | 0.30526147 | 2.39E-05   | -0.040487  | 0.58425844 | -0.4225024 |
| TFB2M    | turquoise | 0.68316321 | 8.91E-27   | -0.299928  | 3.36E-05   | -0.7543706 |
| TEX30    | turquoise | 0.63663574 | 2.05E-22   | -0.1003117 | 0.17428325 | -0.4974463 |
| TESK1    | turquoise | -0.462382  | 3.45E-11   | 0.06054468 | 0.4129767  | 0.19389044 |
| TERF2IP  | turquoise | 0.42165438 | 2.27E-09   | -0.6569477 | 3.18E-24   | -0.6549805 |
| TERF1    | turquoise | 0.37736132 | 1.19E-07   | -0.5835124 | 2.87E-18   | -0.2080726 |
| TEAD4    | turquoise | -0.4388957 | 4.13E-10   | 0.48596185 | 2.35E-12   | 0.62984944 |
| TEAD2    | turquoise | -0.6386353 | 1.38E-22   | 0.73182599 | 2.67E-32   | 0.59531364 |
| TDRD9    | turquoise | 0.57173339 | 1.90E-17   | -0.4810487 | 4.18E-12   | -0.5108113 |
| TDO2     | turquoise | 0.64502539 | 3.80E-23   | -0.4992621 | 4.70E-13   | -0.6080056 |
| TCTEX1D2 | turquoise | 0.65384163 | 6.13E-24   | -0.5004364 | 4.06E-13   | -0.7972449 |
| TCP1     | turquoise | 0.43959386 | 3.84E-10   | -0.0191905 | 0.79542371 | -0.5540379 |
| TCIRG1   | turquoise | -0.6209395 | 4.16E-21   | 0.54992105 | 5.17E-16   | 0.47198711 |
| TCF7L2   | turquoise | -0.4878821 | 1.87E-12   | 0.37237388 | 1.79E-07   | 0.23326106 |
| TCF3     | turquoise | -0.6769042 | 3.83E-26   | 0.61856088 | 6.47E-21   | 0.537675   |
| TCERG1L  | turquoise | 0.4813494  | 4.04E-12   | -0.7071149 | 2.36E-29   | -0.1408886 |
| TCERG1   | turquoise | 0.76535089 | 7.29E-37   | -0.4821738 | 3.67E-12   | -0.3820432 |
| TCEB1    | turquoise | 0.40678133 | 9.15E-09   | 0.01092413 | 0.88267305 | -0.7187028 |
| TCEAL7   | turquoise | 0.53428722 | 4.79E-15   | -0.4242147 | 1.77E-09   | -0.9245805 |
| TCEAL6   | turquoise | 0.67225615 | 1.11E-25   | -0.593869  | 5.12E-19   | -0.8652745 |
| TCEAL3   | turquoise | 0.60662774 | 5.61E-20   | -0.5281434 | 1.11E-14   | -0.5175282 |
| TCEAL2   | turquoise | 0.61480623 | 1.29E-20   | -0.7947775 | 1.51E-41   | -0.636393  |
| TCEAL1   | turquoise | 0.524741   | 1.76E-14   | -0.2867741 | 7.57E-05   | -0.9199025 |
| TBX3     | turquoise | -0.4969992 | 6.21E-13   | 0.69104151 | 1.35E-27   | 0.61407387 |
| TBX2     | turquoise | -0.6356404 | 2.49E-22   | 0.57277477 | 1.61E-17   | 0.64862551 |
| TBPL1    | turquoise | 0.55158862 | 4.05E-16   | -0.4204662 | 2.54E-09   | -0.7384849 |
| TBP      | turquoise | 0.47088078 | 1.34E-11   | -0.2429026 | 0.00086386 | -0.7666476 |
| TBL1X    | turquoise | -0.6649538 | 5.62E-25   | 0.64211408 | 6.86E-23   | 0.83267196 |
| TBK1     | turquoise | 0.61926179 | 5.68E-21   | -0.3954008 | 2.54E-08   | -0.5813507 |
| TBCC     | turquoise | 0.50194395 | 3.37E-13   | -0.7462206 | 3.59E-34   | -0.6242668 |
| TBCA     | turquoise | 0.44312503 | 2.68E-10   | -0.082694  | 0.26311671 | -0.6237504 |

|         |           |            |            |            |            |            |
|---------|-----------|------------|------------|------------|------------|------------|
| TBC1D9B | turquoise | -0.3996293 | 1.75E-08   | 0.65097294 | 1.12E-23   | 0.23056339 |
| TBC1D9  | turquoise | 0.76855801 | 2.43E-37   | -0.6246128 | 2.09E-21   | -0.7750084 |
| TBC1D7  | turquoise | 0.62120904 | 3.95E-21   | -0.7541058 | 2.99E-35   | -0.4424167 |
| TBC1D2B | turquoise | -0.5821048 | 3.62E-18   | 0.69340889 | 7.56E-28   | 0.49817214 |
| TBC1D20 | turquoise | -0.4462434 | 1.94E-10   | 0.29016293 | 6.16E-05   | 0.74473067 |
| TBC1D16 | turquoise | -0.3539036 | 7.74E-07   | 0.36106786 | 4.44E-07   | 0.63056042 |
| TBC1D14 | turquoise | -0.662909  | 8.79E-25   | 0.56486865 | 5.52E-17   | 0.48759618 |
| TBC1D13 | turquoise | -0.3626036 | 3.93E-07   | -0.1078728 | 0.14386382 | 0.70060115 |
| TAZ     | turquoise | -0.5948147 | 4.36E-19   | 0.15232351 | 0.038464   | 0.36075311 |
| TAX1BP3 | turquoise | -0.637651  | 1.67E-22   | 0.56584647 | 4.75E-17   | 0.53662326 |
| TAX1BP1 | turquoise | 0.53228536 | 6.31E-15   | -0.0834579 | 0.25871749 | -0.3873387 |
| TATDN1  | turquoise | 0.60092872 | 1.53E-19   | -0.2389108 | 0.00105635 | -0.3971564 |
| TARBP1  | turquoise | 0.6945369  | 5.73E-28   | -0.6485473 | 1.85E-23   | -0.5312383 |
| TAP1    | turquoise | -0.5717511 | 1.89E-17   | 0.62724063 | 1.27E-21   | 0.56459432 |
| TANC2   | turquoise | 0.59587826 | 3.64E-19   | -0.6368511 | 1.96E-22   | -0.6542438 |
| TAMM41  | turquoise | 0.62503772 | 1.93E-21   | -0.4529968 | 9.52E-11   | -0.6453084 |
| TAGLN3  | turquoise | 0.58397332 | 2.67E-18   | -0.6490949 | 1.65E-23   | -0.8735609 |
| TAGLN   | turquoise | -0.4939384 | 9.03E-13   | 0.50310036 | 2.92E-13   | 0.6350488  |
| TAF9B   | turquoise | 0.49122793 | 1.25E-12   | -0.1127091 | 0.1266392  | -0.7587834 |
| TAF6L   | turquoise | -0.4648496 | 2.63E-11   | 0.00603882 | 0.93498    | 0.73829805 |
| TAF4    | turquoise | -0.4003134 | 1.64E-08   | 0.69855912 | 2.10E-28   | 0.36654906 |
| TAF2    | turquoise | 0.46907448 | 1.64E-11   | -0.0747678 | 0.31178866 | -0.8427523 |
| TAF1C   | turquoise | -0.4006641 | 1.59E-08   | 0.36348759 | 3.67E-07   | 0.60217202 |
| TADA1   | turquoise | 0.71050868 | 9.70E-30   | -0.3993804 | 1.79E-08   | -0.7866847 |
| TACC2   | turquoise | 0.52516275 | 1.66E-14   | -0.283707  | 9.10E-05   | -0.7480061 |
| TAC1    | turquoise | 0.76238749 | 1.98E-36   | -0.6356515 | 2.48E-22   | -0.6577296 |
| SZRD1   | turquoise | -0.6792658 | 2.22E-26   | 0.76519721 | 7.68E-37   | 0.69190878 |
| SYTL4   | turquoise | -0.5741321 | 1.30E-17   | 0.75168796 | 6.47E-35   | 0.63770401 |
| SYT7    | turquoise | -0.329778  | 4.56E-06   | -0.0339228 | 0.64666197 | 0.70885482 |
| SYT4    | turquoise | 0.61686555 | 8.84E-21   | -0.7788066 | 6.47E-39   | -0.5019488 |
| SYT17   | turquoise | -0.3577635 | 5.74E-07   | 0.04795812 | 0.51682143 | 0.65331605 |
| SYT13   | turquoise | 0.68919207 | 2.11E-27   | -0.7795986 | 4.85E-39   | -0.5788693 |
| SYT1    | turquoise | 0.66030969 | 1.54E-24   | -0.6557666 | 4.08E-24   | -0.8207084 |
| SYNPR   | turquoise | 0.51994535 | 3.34E-14   | -0.5802363 | 4.90E-18   | -0.5875618 |
| SYNJ1   | turquoise | 0.70423837 | 4.97E-29   | -0.6766963 | 4.02E-26   | -0.5261269 |
| SYNGR1  | turquoise | 0.32850964 | 4.99E-06   | -0.7397522 | 2.58E-33   | -0.2536045 |
| SYNCRIP | turquoise | 0.54672113 | 8.23E-16   | -0.2526958 | 0.00052001 | -0.5760867 |
| SYN2    | turquoise | 0.65176877 | 9.47E-24   | -0.8200584 | 3.14E-46   | -0.576366  |
| SYMPK   | turquoise | -0.44249   | 2.86E-10   | 0.05291974 | 0.47435622 | 0.60799577 |
| SYK     | turquoise | -0.2491835 | 0.00062528 | 0.63610044 | 2.27E-22   | 0.26168582 |
| SYDE1   | turquoise | -0.6188348 | 6.15E-21   | 0.6971259  | 3.01E-28   | 0.67180773 |
| SYBU    | turquoise | 0.60177971 | 1.32E-19   | -0.5936047 | 5.36E-19   | -0.7910691 |
| SVOP    | turquoise | 0.58575963 | 1.99E-18   | -0.8814714 | 1.57E-61   | -0.5378877 |
| SVIL    | turquoise | -0.4407152 | 3.43E-10   | 0.74963296 | 1.24E-34   | 0.45511084 |
| SV2B    | turquoise | 0.58267616 | 3.30E-18   | -0.7794194 | 5.17E-39   | -0.5842758 |
| SUV39H2 | turquoise | -0.4494161 | 1.39E-10   | 0.29384313 | 4.92E-05   | 0.78670069 |



|          |           |            |            |            |            |            |
|----------|-----------|------------|------------|------------|------------|------------|
| SUSD1    | turquoise | 0.65025547 | 1.30E-23   | -0.5114708 | 1.01E-13   | -0.8050849 |
| SURF6    | turquoise | -0.2934709 | 5.03E-05   | -0.0602476 | 0.41527695 | 0.63170774 |
| SURF1    | turquoise | -0.4093659 | 7.22E-09   | 0.28596444 | 7.95E-05   | 0.24766392 |
| SUN1     | turquoise | 0.37322529 | 1.67E-07   | 0.07987489 | 0.27979488 | -0.7400373 |
| SUMO3    | turquoise | 0.57748867 | 7.62E-18   | -0.6740575 | 7.35E-26   | -0.7172643 |
| SUMO2    | turquoise | 0.31026944 | 1.72E-05   | 0.10586128 | 0.1515315  | -0.7512517 |
| SUMO1P3  | turquoise | 0.67576176 | 4.98E-26   | -0.2800845 | 0.00011278 | -0.3244937 |
| SULF1    | turquoise | 0.27976978 | 0.00011488 | -0.3153255 | 1.23E-05   | -0.5636167 |
| SUCLA2   | turquoise | 0.61586357 | 1.06E-20   | -0.3383791 | 2.47E-06   | -0.89012   |
| SUB1     | turquoise | 0.67346611 | 8.40E-26   | -0.4006487 | 1.60E-08   | -0.7078002 |
| STXBP5L  | turquoise | 0.75536446 | 1.99E-35   | -0.6420219 | 6.99E-23   | -0.7029987 |
| STXBP5   | turquoise | 0.74007437 | 2.34E-33   | -0.5813027 | 4.12E-18   | -0.5720575 |
| STX7     | turquoise | 0.46548719 | 2.45E-11   | -0.0384033 | 0.60376578 | -0.7578425 |
| STX6     | turquoise | 0.59313723 | 5.80E-19   | -0.5965355 | 3.25E-19   | -0.6581581 |
| STX5     | turquoise | -0.560281  | 1.11E-16   | 0.04989503 | 0.50001493 | 0.69176659 |
| STX12    | turquoise | 0.67455035 | 6.57E-26   | -0.5067691 | 1.84E-13   | -0.6530556 |
| STRBP    | turquoise | 0.6368376  | 1.97E-22   | -0.3624658 | 3.98E-07   | -0.574243  |
| STRAP    | turquoise | 0.49381693 | 9.16E-13   | -0.0078462 | 0.9155838  | -0.7647229 |
| STRA13   | turquoise | -0.4619183 | 3.63E-11   | 0.48791652 | 1.86E-12   | 0.73039618 |
| STMN4    | turquoise | 0.37355055 | 1.63E-07   | -0.77239   | 6.41E-38   | -0.3231424 |
| STMN3    | turquoise | 0.59541866 | 3.94E-19   | -0.6438039 | 4.87E-23   | -0.3432216 |
| STMN2    | turquoise | 0.58078435 | 4.48E-18   | -0.7817072 | 2.23E-39   | -0.6252514 |
| STK40    | turquoise | -0.5652756 | 5.18E-17   | 0.54939865 | 5.58E-16   | 0.69749085 |
| STK39    | turquoise | 0.49108734 | 1.27E-12   | -0.5113464 | 1.02E-13   | -0.6903901 |
| STK38    | turquoise | -0.6107401 | 2.69E-20   | 0.68236834 | 1.07E-26   | 0.74123328 |
| STK3     | turquoise | -0.439824  | 3.75E-10   | 0.72242268 | 3.85E-31   | 0.52006108 |
| STK26    | turquoise | -0.3506794 | 9.89E-07   | 0.28316102 | 9.40E-05   | 0.73220727 |
| STK24    | turquoise | 0.48548222 | 2.49E-12   | -0.1999313 | 0.00636168 | -0.5314647 |
| STK19    | turquoise | -0.4088213 | 7.59E-09   | 0.14574956 | 0.0477535  | 0.63505962 |
| STK11    | turquoise | -0.5034151 | 2.80E-13   | 0.14127353 | 0.05509386 | 0.61063206 |
| STH      | turquoise | -0.4723413 | 1.14E-11   | 0.16149883 | 0.02807976 | 0.5281264  |
| STEAP3   | turquoise | -0.2888664 | 6.67E-05   | 0.53362298 | 5.25E-15   | 0.42299316 |
| STEAP2   | turquoise | 0.67382289 | 7.75E-26   | -0.5876548 | 1.45E-18   | -0.7662623 |
| STAU2    | turquoise | 0.659878   | 1.70E-24   | -0.4621955 | 3.53E-11   | -0.7323078 |
| STAT5A   | turquoise | -0.5615811 | 9.12E-17   | 0.55427506 | 2.73E-16   | 0.68735553 |
| STAT4    | turquoise | 0.66776025 | 3.02E-25   | -0.746407  | 3.39E-34   | -0.7408211 |
| STAT3    | turquoise | -0.5495409 | 5.47E-16   | 0.66456495 | 6.12E-25   | 0.15453908 |
| STAT2    | turquoise | -0.3429223 | 1.77E-06   | 0.18423208 | 0.01206051 | 0.786078   |
| STAT1    | turquoise | 0.32118149 | 8.29E-06   | -0.038037  | 0.60722457 | -0.3478833 |
| STARD3NL | turquoise | 0.35516728 | 7.02E-07   | 0.04924056 | 0.50566136 | -0.7950734 |
| STARD3   | turquoise | -0.6554621 | 4.35E-24   | 0.3707596  | 2.05E-07   | 0.71259032 |
| STARD10  | turquoise | -0.4739468 | 9.48E-12   | 0.12579371 | 0.08797703 | 0.03932811 |
| STAMBPL1 | turquoise | 0.62395845 | 2.36E-21   | -0.5265609 | 1.38E-14   | -0.8581469 |
| STAM     | turquoise | 0.65797523 | 2.55E-24   | -0.4460592 | 1.98E-10   | -0.8505175 |
| STAB1    | turquoise | -0.4643644 | 2.78E-11   | 0.38936243 | 4.31E-08   | 0.30008568 |
| ST8SIA5  | turquoise | 0.41544101 | 4.10E-09   | -0.7100802 | 1.09E-29   | -0.0199103 |

|           |           |            |            |            |            |            |
|-----------|-----------|------------|------------|------------|------------|------------|
| ST8SIA3   | turquoise | 0.53302138 | 5.70E-15   | -0.7306884 | 3.71E-32   | -0.3751703 |
| ST6GALNAC | turquoise | 0.72547072 | 1.64E-31   | -0.7231609 | 3.14E-31   | -0.6507609 |
| ST5       | turquoise | -0.6528234 | 7.59E-24   | 0.495973   | 7.04E-13   | 0.41095122 |
| ST3GAL5   | turquoise | 0.4819329  | 3.77E-12   | -0.5469921 | 7.92E-16   | -0.7470136 |
| SSX2IP    | turquoise | 0.70994487 | 1.13E-29   | -0.6496904 | 1.46E-23   | -0.5136925 |
| SSTR1     | turquoise | 0.82334006 | 6.85E-47   | -0.4524705 | 1.01E-10   | -0.4950309 |
| SST       | turquoise | 0.55761105 | 1.66E-16   | -0.6352483 | 2.69E-22   | -0.7095888 |
| SSPO      | turquoise | -0.2998289 | 3.38E-05   | 0.17975997 | 0.01434898 | 0.76453837 |
| SSH3      | turquoise | -0.4904709 | 1.37E-12   | 0.34387638 | 1.65E-06   | 0.7794043  |
| SSFA2     | turquoise | -0.3444142 | 1.58E-06   | 0.69395788 | 6.60E-28   | 0.07938112 |
| SSBP1     | turquoise | 0.42727082 | 1.32E-09   | -0.0666681 | 0.36724704 | -0.77216   |
| SSB       | turquoise | 0.46388322 | 2.93E-11   | -0.0896791 | 0.22476785 | -0.831377  |
| SS18L1    | turquoise | 0.61465928 | 1.32E-20   | -0.6172564 | 8.23E-21   | -0.3706732 |
| SRSF8     | turquoise | 0.5810323  | 4.31E-18   | -0.3025405 | 2.84E-05   | -0.7875891 |
| SRSF7     | turquoise | 0.63277077 | 4.36E-22   | -0.5411403 | 1.83E-15   | -0.5881742 |
| SRSF3     | turquoise | 0.59922908 | 2.05E-19   | -0.3307224 | 4.27E-06   | -0.8389881 |
| SRSF2     | turquoise | 0.38078619 | 8.94E-08   | -0.112016  | 0.12900503 | -0.7701223 |
| SRSF12    | turquoise | 0.67329263 | 8.74E-26   | -0.540227  | 2.08E-15   | -0.7405975 |
| SRRM4     | turquoise | 0.40391293 | 1.19E-08   | -0.7802727 | 3.79E-39   | -0.3578199 |
| SRRM2     | turquoise | -0.5482134 | 6.63E-16   | 0.31430377 | 1.32E-05   | 0.58021966 |
| SRPK2     | turquoise | 0.80159374 | 9.63E-43   | -0.4388312 | 4.15E-10   | -0.684654  |
| SRPK1     | turquoise | 0.57364679 | 1.41E-17   | -0.3454392 | 1.47E-06   | -0.5331983 |
| SRP9      | turquoise | 0.29823576 | 3.74E-05   | 0.13287391 | 0.07138281 | -0.6744163 |
| SRP72     | turquoise | 0.70312666 | 6.61E-29   | -0.5532901 | 3.15E-16   | -0.5209106 |
| SRP54     | turquoise | 0.4131427  | 5.08E-09   | -0.0082582 | 0.91116887 | -0.8115224 |
| SRGAP3    | turquoise | 0.49998603 | 4.30E-13   | -0.6924286 | 9.62E-28   | -0.2977354 |
| SRGAP1    | turquoise | -0.568606  | 3.10E-17   | 0.61365893 | 1.59E-20   | 0.72135329 |
| SREBF1    | turquoise | -0.324117  | 6.77E-06   | 0.18571498 | 0.01137597 | 0.5095708  |
| SRD5A1    | turquoise | 0.64190484 | 7.15E-23   | -0.747333  | 2.54E-34   | -0.6191491 |
| SQLE      | turquoise | 0.46256575 | 3.38E-11   | -0.1842263 | 0.01206326 | -0.7959908 |
| SPTSSB    | turquoise | 0.73787254 | 4.53E-33   | -0.4880963 | 1.82E-12   | -0.5894325 |
| SPTLC1    | turquoise | 0.28013972 | 0.00011241 | 0.26335138 | 0.00029252 | -0.6373657 |
| SPTBN1    | turquoise | -0.5173552 | 4.69E-14   | 0.31722674 | 1.08E-05   | 0.70622582 |
| SPRYD7    | turquoise | 0.69699734 | 3.11E-28   | -0.7423235 | 1.19E-33   | -0.6944266 |
| SPR       | turquoise | -0.5385868 | 2.63E-15   | 0.52749332 | 1.21E-14   | 0.42952169 |
| SPP1      | turquoise | -0.3035412 | 2.67E-05   | 0.41183809 | 5.74E-09   | -0.1657787 |
| SPOCK1    | turquoise | 0.257372   | 0.00040519 | -0.5106201 | 1.12E-13   | -0.6068203 |
| SPNS2     | turquoise | -0.4307006 | 9.39E-10   | 0.07564818 | 0.30610935 | 0.60840434 |
| SPINT2    | turquoise | 0.62160388 | 3.67E-21   | -0.8200498 | 3.16E-46   | -0.3746232 |
| SPIDR     | turquoise | 0.4214365  | 2.32E-09   | -0.4528952 | 9.62E-11   | -0.652182  |
| SPHKAP    | turquoise | 0.56098317 | 9.98E-17   | -0.6016883 | 1.34E-19   | -0.8269851 |
| SPHK2     | turquoise | -0.5132616 | 8.00E-14   | 0.22059244 | 0.00255034 | 0.7088763  |
| SPEN      | turquoise | -0.6075688 | 4.75E-20   | 0.48550349 | 2.48E-12   | 0.57915755 |
| SPATS2L   | turquoise | 0.27569534 | 0.00014568 | 0.03076746 | 0.67759681 | -0.7530371 |
| SPATA13   | turquoise | -0.3342901 | 3.31E-06   | 0.45044666 | 1.25E-10   | 0.36271373 |
| SPAST     | turquoise | 0.55996706 | 1.16E-16   | -0.1337351 | 0.06955071 | -0.7259535 |

|           |           |            |            |            |            |            |
|-----------|-----------|------------|------------|------------|------------|------------|
| SPARCL1   | turquoise | 0.2786622  | 0.00012259 | 0.16410667 | 0.02560715 | -0.7343675 |
| SPAG16    | turquoise | -0.3250113 | 6.37E-06   | 0.43613441 | 5.46E-10   | 0.60665096 |
| SPACA6    | turquoise | -0.4711574 | 1.30E-11   | 0.35408208 | 7.63E-07   | 0.78804624 |
| SP110     | turquoise | -0.4072583 | 8.76E-09   | 0.6334645  | 3.81E-22   | 0.49049615 |
| SP100     | turquoise | -0.3798215 | 9.70E-08   | 0.48922053 | 1.59E-12   | 0.42845594 |
| SP1       | turquoise | -0.6289778 | 9.08E-22   | 0.44812794 | 1.59E-10   | 0.76702594 |
| SOX8      | turquoise | -0.594235  | 4.82E-19   | 0.35290493 | 8.35E-07   | 0.68459052 |
| SOX4      | turquoise | -0.3122581 | 1.51E-05   | 0.49114096 | 1.27E-12   | 0.60973907 |
| SOX18     | turquoise | -0.3513437 | 9.41E-07   | 0.42043928 | 2.55E-09   | 0.53372642 |
| SOX13     | turquoise | -0.6794606 | 2.12E-26   | 0.70558568 | 3.51E-29   | 0.7036711  |
| SOWAHC    | turquoise | -0.4360371 | 5.51E-10   | 0.73244818 | 2.23E-32   | 0.63491566 |
| SOWAHA    | turquoise | 0.38896172 | 4.46E-08   | -0.180427  | 0.01398521 | -0.6177768 |
| SORBS2    | turquoise | 0.66271901 | 9.16E-25   | -0.6537612 | 6.23E-24   | -0.5390578 |
| SORBS1    | turquoise | -0.5733398 | 1.48E-17   | 0.58431232 | 2.52E-18   | 0.80238181 |
| SOCS5     | turquoise | 0.53659064 | 3.47E-15   | -0.0609216 | 0.41006853 | -0.7047492 |
| SNX6      | turquoise | -0.5272202 | 1.26E-14   | 0.33630315 | 2.87E-06   | 0.83499964 |
| SNX5      | turquoise | -0.3447848 | 1.54E-06   | 0.78076711 | 3.16E-39   | 0.43799104 |
| SNX4      | turquoise | 0.68021654 | 1.78E-26   | -0.2913068 | 5.75E-05   | -0.609038  |
| SNX30     | turquoise | 0.52201027 | 2.54E-14   | -0.2094652 | 0.00421592 | -0.7702859 |
| SNX3      | turquoise | 0.26688906 | 0.00024036 | 0.24861517 | 0.00064406 | -0.6711918 |
| SNX22     | turquoise | -0.5189956 | 3.78E-14   | 0.29473476 | 4.65E-05   | 0.74383066 |
| SNX14     | turquoise | 0.7887252  | 1.60E-40   | -0.457079  | 6.15E-11   | -0.4853265 |
| SNX10     | turquoise | 0.75217377 | 5.54E-35   | -0.646557  | 2.78E-23   | -0.7503865 |
| SNU13     | turquoise | 0.48102098 | 4.20E-12   | -0.8172682 | 1.12E-45   | -0.1526939 |
| SNTG1     | turquoise | 0.70342207 | 6.13E-29   | -0.5950385 | 4.20E-19   | -0.6851228 |
| SNRPN     | turquoise | 0.54742629 | 7.44E-16   | -0.7759037 | 1.84E-38   | -0.6343768 |
| SNRPB2    | turquoise | 0.61496186 | 1.25E-20   | -0.1786915 | 0.01494892 | -0.6435684 |
| SNRPA1    | turquoise | 0.55865621 | 1.42E-16   | -0.5270793 | 1.28E-14   | -0.7019457 |
| SNRNPN70  | turquoise | -0.3567167 | 6.23E-07   | 0.04795032 | 0.51688969 | 0.68307817 |
| SNRNPN27  | turquoise | 0.38113263 | 8.69E-08   | -0.0823591 | 0.26506197 | -0.8026612 |
| SNORD3A   | turquoise | -0.2230916 | 0.00227041 | 0.05688426 | 0.44184078 | 0.71903494 |
| SNORD114- | turquoise | 0.60591124 | 6.37E-20   | -0.7010111 | 1.13E-28   | -0.297678  |
| SNORD104  | turquoise | -0.5184365 | 4.07E-14   | 0.35249275 | 8.62E-07   | 0.83935374 |
| SNORA8    | turquoise | 0.60005702 | 1.77E-19   | -0.4588024 | 5.10E-11   | -0.5203503 |
| SNORA18   | turquoise | 0.50787661 | 1.60E-13   | -0.5003604 | 4.10E-13   | -0.7189305 |
| SNHG5     | turquoise | -0.4392139 | 4.00E-10   | 0.6002046  | 1.73E-19   | 0.5880903  |
| SNCA      | turquoise | 0.62056914 | 4.46E-21   | -0.6135046 | 1.63E-20   | -0.8596396 |
| SNAR-A1   | turquoise | -0.4137467 | 4.80E-09   | 0.28793265 | 7.06E-05   | 0.47051112 |
| SNAP91    | turquoise | 0.64433727 | 4.37E-23   | -0.70641   | 2.84E-29   | -0.4145564 |
| SNAP25    | turquoise | 0.55567706 | 2.21E-16   | -0.629621  | 8.03E-22   | -0.6664045 |
| SMYD3     | turquoise | 0.68367013 | 7.91E-27   | -0.6650834 | 5.46E-25   | -0.7227108 |
| SMYD2     | turquoise | 0.60936584 | 3.45E-20   | -0.5827562 | 3.25E-18   | -0.7964233 |
| SMS       | turquoise | 0.39840441 | 1.95E-08   | -0.0421095 | 0.56927396 | -0.779529  |
| SMPX      | turquoise | 0.71090922 | 8.73E-30   | -0.4996454 | 4.48E-13   | -0.5638193 |
| SMPDL3A   | turquoise | 0.48265199 | 3.47E-12   | -0.0133203 | 0.85718753 | -0.7779604 |
| SMOX      | turquoise | -0.7459763 | 3.87E-34   | 0.61236327 | 2.01E-20   | 0.632314   |

|          |           |            |            |            |            |            |
|----------|-----------|------------|------------|------------|------------|------------|
| SMOC1    | turquoise | -0.6393411 | 1.20E-22   | 0.54216201 | 1.58E-15   | 0.6147185  |
| SMO      | turquoise | -0.6309166 | 6.25E-22   | 0.67822164 | 2.83E-26   | 0.69303391 |
| SMIM14   | turquoise | 0.61333096 | 1.69E-20   | -0.3144347 | 1.31E-05   | -0.8111136 |
| SMIM13   | turquoise | 0.67691163 | 3.82E-26   | -0.4870958 | 2.05E-12   | -0.742554  |
| SMG5     | turquoise | -0.6720522 | 1.16E-25   | 0.37212871 | 1.83E-07   | 0.5977896  |
| SMG1     | turquoise | 0.31562564 | 1.21E-05   | 0.14767316 | 0.04485946 | -0.6688354 |
| SMARCD3  | turquoise | -0.4861854 | 2.29E-12   | 0.20547691 | 0.00501843 | 0.76092748 |
| SMARCD1  | turquoise | -0.4070142 | 8.96E-09   | 0.05114258 | 0.48934426 | 0.66614314 |
| SMARCC1  | turquoise | -0.6249621 | 1.95E-21   | 0.67094229 | 1.49E-25   | 0.62004992 |
| SMARCAD1 | turquoise | 0.5918418  | 7.22E-19   | -0.0935308 | 0.20540134 | -0.6128522 |
| SMARCA5  | turquoise | -0.3196717 | 9.19E-06   | 0.59778632 | 2.63E-19   | 0.56183026 |
| SMARCA2  | turquoise | 0.63586546 | 2.38E-22   | -0.4134983 | 4.92E-09   | -0.2517042 |
| SMAP2    | turquoise | 0.5523687  | 3.61E-16   | -0.6996309 | 1.61E-28   | -0.1302632 |
| SMAP1    | turquoise | 0.62430713 | 2.21E-21   | -0.4349296 | 6.16E-10   | -0.7090235 |
| SMAD6    | turquoise | -0.464222  | 2.82E-11   | 0.63081157 | 6.38E-22   | 0.42722069 |
| SLX4IP   | turquoise | -0.5151076 | 6.30E-14   | 0.2415315  | 0.00092601 | 0.77113025 |
| SLITRK5  | turquoise | 0.69415499 | 6.29E-28   | -0.7934784 | 2.52E-41   | -0.5812386 |
| SLITRK4  | turquoise | 0.69479057 | 5.38E-28   | -0.7542983 | 2.81E-35   | -0.6969935 |
| SLITRK3  | turquoise | 0.58188344 | 3.75E-18   | -0.6779352 | 3.02E-26   | -0.4384721 |
| SLITRK1  | turquoise | 0.54754065 | 7.31E-16   | -0.63491   | 2.87E-22   | -0.8253933 |
| SLIT3    | turquoise | 0.70876292 | 1.54E-29   | -0.7059245 | 3.22E-29   | -0.6815511 |
| SLIRP    | turquoise | 0.42942699 | 1.06E-09   | -0.1221918 | 0.09753203 | -0.7639618 |
| SLF2     | turquoise | -0.3710817 | 1.99E-07   | 0.15832466 | 0.03136215 | 0.69375557 |
| SLF1     | turquoise | 0.61774409 | 7.52E-21   | -0.5251243 | 1.67E-14   | -0.3889169 |
| SLCO4A1  | turquoise | -0.6225547 | 3.07E-21   | 0.62007365 | 4.89E-21   | 0.32175049 |
| SLCO2B1  | turquoise | -0.5127621 | 8.53E-14   | 0.76481616 | 8.74E-37   | 0.43219991 |
| SLCO1C1  | turquoise | 0.27951539 | 0.00011661 | 0.11307361 | 0.1254084  | -0.4627138 |
| SLC9A9   | turquoise | -0.4286725 | 1.15E-09   | 0.79029092 | 8.74E-41   | 0.39466927 |
| SLC9A7   | turquoise | 0.56764509 | 3.60E-17   | -0.633675  | 3.66E-22   | -0.4243964 |
| SLC9A6   | turquoise | 0.69634946 | 3.65E-28   | -0.7384764 | 3.78E-33   | -0.6634862 |
| SLC9A3R1 | turquoise | -0.6838836 | 7.52E-27   | 0.47926938 | 5.15E-12   | 0.70678219 |
| SLC8A3   | turquoise | 0.58934058 | 1.10E-18   | -0.6924732 | 9.51E-28   | -0.3673978 |
| SLC8A2   | turquoise | 0.3948421  | 2.67E-08   | -0.7712599 | 9.53E-38   | -0.4652458 |
| SLC8A1   | turquoise | 0.65176373 | 9.48E-24   | -0.7347873 | 1.13E-32   | -0.5563152 |
| SLC7A5   | turquoise | -0.6855271 | 5.09E-27   | 0.45656176 | 6.50E-11   | 0.72106092 |
| SLC7A2   | turquoise | -0.5728176 | 1.60E-17   | 0.66687305 | 3.68E-25   | 0.62049593 |
| SLC7A14  | turquoise | 0.5760564  | 9.58E-18   | -0.712984  | 5.03E-30   | -0.2188489 |
| SLC6A9   | turquoise | -0.6058524 | 6.44E-20   | 0.45741193 | 5.93E-11   | 0.46285628 |
| SLC6A8   | turquoise | -0.6110464 | 2.55E-20   | 0.13810759 | 0.06083014 | 0.42821022 |
| SLC6A15  | turquoise | 0.64480955 | 3.97E-23   | -0.6739319 | 7.56E-26   | -0.7262124 |
| SLC6A12  | turquoise | -0.6828278 | 9.64E-27   | 0.61796672 | 7.22E-21   | 0.56569367 |
| SLC6A10P | turquoise | -0.621514  | 3.74E-21   | 0.19241118 | 0.0086929  | 0.75455726 |
| SLC6A1   | turquoise | 0.19932755 | 0.00652576 | 0.15996326 | 0.02962906 | -0.6527976 |
| SLC52A3  | turquoise | -0.5942593 | 4.80E-19   | 0.57141041 | 2.00E-17   | 0.46686786 |
| SLC52A2  | turquoise | -0.6130346 | 1.78E-20   | 0.2617262  | 0.00031985 | 0.59035668 |
| SLC4A1AP | turquoise | 0.70687078 | 2.52E-29   | -0.591943  | 7.09E-19   | -0.7204074 |

|          |           |            |            |            |            |            |
|----------|-----------|------------|------------|------------|------------|------------|
| SLC4A11  | turquoise | -0.5110297 | 1.07E-13   | 0.43943688 | 3.91E-10   | 0.46972746 |
| SLC48A1  | turquoise | -0.225705  | 0.00200782 | 0.23504926 | 0.00127928 | 0.73407139 |
| SLC3A2   | turquoise | -0.7300789 | 4.43E-32   | 0.60702204 | 5.23E-20   | 0.40604764 |
| SLC39A11 | turquoise | -0.4755915 | 7.86E-12   | 0.63948373 | 1.16E-22   | 0.51029862 |
| SLC39A10 | turquoise | 0.75693963 | 1.20E-35   | -0.6223047 | 3.22E-21   | -0.7287141 |
| SLC39A1  | turquoise | -0.5904    | 9.19E-19   | 0.65284857 | 7.55E-24   | 0.57366851 |
| SLC38A7  | turquoise | -0.2629163 | 0.00029962 | -0.2690922 | 0.0002124  | 0.56784816 |
| SLC38A3  | turquoise | -0.4313786 | 8.78E-10   | 0.22204367 | 0.00238421 | 0.49874091 |
| SLC35G2  | turquoise | 0.36156691 | 4.27E-07   | 0.15083628 | 0.04042005 | -0.6106173 |
| SLC35E3  | turquoise | 0.53027183 | 8.32E-15   | -0.2568564 | 0.00041659 | -0.4932396 |
| SLC35B4  | turquoise | 0.58861285 | 1.24E-18   | -0.6335255 | 3.77E-22   | -0.4704952 |
| SLC35B1  | turquoise | 0.38944956 | 4.28E-08   | -0.5873097 | 1.54E-18   | -0.7045725 |
| SLC35A5  | turquoise | 0.39333443 | 3.05E-08   | -0.0264618 | 0.72068551 | -0.4343265 |
| SLC35A2  | turquoise | 0.33954524 | 2.26E-06   | -0.7449044 | 5.39E-34   | -0.4493992 |
| SLC35A1  | turquoise | 0.52984111 | 8.82E-15   | -0.2824028 | 9.83E-05   | -0.6303772 |
| SLC30A9  | turquoise | 0.66508845 | 5.46E-25   | -0.5500234 | 5.10E-16   | -0.6876951 |
| SLC30A3  | turquoise | 0.40128206 | 1.51E-08   | -0.8232235 | 7.24E-47   | -0.3272485 |
| SLC2A4RG | turquoise | -0.5324849 | 6.14E-15   | 0.60596277 | 6.31E-20   | 0.68885561 |
| SLC2A1   | turquoise | -0.4822653 | 3.63E-12   | 0.68482484 | 6.01E-27   | 0.41078867 |
| SLC29A4  | turquoise | -0.4143362 | 4.54E-09   | 0.20038289 | 0.00624138 | 0.69426666 |
| SLC27A1  | turquoise | -0.6009013 | 1.53E-19   | 0.21878471 | 0.00277195 | 0.65700487 |
| SLC26A8  | turquoise | 0.3881105  | 4.80E-08   | -0.7201262 | 7.27E-31   | -0.505397  |
| SLC26A4  | turquoise | 0.71508449 | 2.87E-30   | -0.5434817 | 1.31E-15   | -0.2349844 |
| SLC25A5  | turquoise | 0.3189946  | 9.62E-06   | 0.05994196 | 0.41765174 | -0.8025479 |
| SLC25A46 | turquoise | 0.64377028 | 4.91E-23   | -0.3480963 | 1.20E-06   | -0.8132009 |
| SLC25A44 | turquoise | 0.66867307 | 2.47E-25   | -0.6782462 | 2.81E-26   | -0.6517197 |
| SLC25A42 | turquoise | -0.3561505 | 6.51E-07   | 0.13396684 | 0.0690642  | 0.70998435 |
| SLC25A40 | turquoise | 0.63721325 | 1.82E-22   | -0.4863752 | 2.24E-12   | -0.7190633 |
| SLC25A4  | turquoise | 0.51556551 | 5.93E-14   | -0.2709532 | 0.00019117 | -0.9042359 |
| SLC25A37 | turquoise | -0.5040308 | 2.59E-13   | 0.16846483 | 0.02189141 | 0.66342987 |
| SLC25A3  | turquoise | 0.23304904 | 0.00141096 | -0.0909641 | 0.21816811 | -0.7317238 |
| SLC25A29 | turquoise | -0.4962698 | 6.79E-13   | 0.15322034 | 0.03732349 | 0.80164535 |
| SLC25A28 | turquoise | -0.6872405 | 3.38E-27   | 0.34970618 | 1.07E-06   | 0.54705648 |
| SLC25A26 | turquoise | 0.42703774 | 1.35E-09   | -0.3793747 | 1.01E-07   | -0.4445987 |
| SLC25A20 | turquoise | -0.4998333 | 4.38E-13   | 0.75135299 | 7.20E-35   | 0.63762836 |
| SLC25A18 | turquoise | -0.6699799 | 1.84E-25   | 0.58569312 | 2.01E-18   | 0.77168783 |
| SLC25A12 | turquoise | 0.63585962 | 2.38E-22   | -0.6462785 | 2.94E-23   | -0.6772932 |
| SLC22A1  | turquoise | -0.3749131 | 1.46E-07   | 0.19646894 | 0.00735499 | 0.81075088 |
| SLC20A1  | turquoise | 0.40687994 | 9.07E-09   | -0.1988353 | 0.00666232 | -0.7460296 |
| SLC1A7   | turquoise | -0.4754501 | 7.99E-12   | 0.46357752 | 3.03E-11   | 0.48374487 |
| SLC1A4   | turquoise | -0.3523203 | 8.73E-07   | 0.2202381  | 0.00259247 | 0.70125605 |
| SLC1A1   | turquoise | 0.41418284 | 4.61E-09   | -0.093809  | 0.204051   | -0.7039987 |
| SLC19A2  | turquoise | -0.5239098 | 1.97E-14   | 0.25416465 | 0.00048106 | 0.73714303 |
| SLC18B1  | turquoise | -0.375855  | 1.35E-07   | 0.5580304  | 1.56E-16   | 0.6919433  |
| SLC17A7  | turquoise | 0.29184912 | 5.56E-05   | -0.7017434 | 9.40E-29   | -0.3047864 |
| SLC17A6  | turquoise | 0.59349798 | 5.46E-19   | -0.7373981 | 5.21E-33   | -0.4504217 |

|          |           |            |            |            |            |            |
|----------|-----------|------------|------------|------------|------------|------------|
| SLC16A9  | turquoise | -0.5174406 | 4.64E-14   | 0.69831774 | 2.23E-28   | 0.67308411 |
| SLC16A3  | turquoise | -0.3393538 | 2.30E-06   | 0.29970848 | 3.41E-05   | 0.447741   |
| SLC16A14 | turquoise | 0.56112693 | 9.77E-17   | -0.4209036 | 2.44E-09   | -0.9037033 |
| SLC15A3  | turquoise | -0.5564209 | 1.98E-16   | 0.70331852 | 6.29E-29   | 0.72825818 |
| SLC13A5  | turquoise | -0.1758261 | 0.01666733 | 0.2245203  | 0.00212323 | 0.54081166 |
| SLC12A9  | turquoise | -0.489082  | 1.62E-12   | 0.33318603 | 3.58E-06   | 0.88003513 |
| SLC12A5  | turquoise | 0.56900626 | 2.91E-17   | -0.7184765 | 1.14E-30   | -0.600362  |
| SLC11A1  | turquoise | -0.346654  | 1.34E-06   | 0.42771474 | 1.26E-09   | 0.34280907 |
| SLBP     | turquoise | 0.70408878 | 5.16E-29   | -0.3974863 | 2.12E-08   | -0.4622485 |
| SLA      | turquoise | -0.207277  | 0.00464064 | 0.52776612 | 1.17E-14   | 0.06162855 |
| SKP1     | turquoise | 0.62026132 | 4.72E-21   | -0.3921263 | 3.39E-08   | -0.8427551 |
| SKAP2    | turquoise | 0.58446683 | 2.46E-18   | -0.4037826 | 1.20E-08   | -0.8038227 |
| SKA2     | turquoise | -0.2944721 | 4.73E-05   | 0.58462459 | 2.40E-18   | 0.56730984 |
| SIRT2    | turquoise | -0.3761365 | 1.32E-07   | 0.28746375 | 7.26E-05   | 0.20064897 |
| SIMC1    | turquoise | 0.56935507 | 2.76E-17   | -0.3210639 | 8.35E-06   | -0.8171238 |
| SIK1     | turquoise | -0.3310887 | 4.16E-06   | 0.50254854 | 3.12E-13   | 0.26282799 |
| SIAH1    | turquoise | 0.41494793 | 4.29E-09   | -0.1699242 | 0.02075587 | -0.6956165 |
| SHTN1    | turquoise | -0.4457513 | 2.04E-10   | 0.31454089 | 1.30E-05   | 0.27978991 |
| SHROOM1  | turquoise | -0.4709066 | 1.34E-11   | 0.27211567 | 0.00017893 | 0.50666205 |
| SHPK     | turquoise | -0.2425129 | 0.00088113 | 0.29931563 | 3.49E-05   | 0.62645045 |
| SHMT2    | turquoise | -0.5290688 | 9.80E-15   | 0.30175093 | 2.99E-05   | 0.67898191 |
| SHD      | turquoise | 0.21659584 | 0.00306354 | -0.3521649 | 8.84E-07   | 0.24156326 |
| SHC1     | turquoise | -0.6014262 | 1.40E-19   | 0.37652397 | 1.28E-07   | 0.53288698 |
| SHANK2   | turquoise | 0.63390867 | 3.49E-22   | -0.6768    | 3.92E-26   | -0.2888555 |
| SH3TC1   | turquoise | -0.4979896 | 5.50E-13   | 0.51212301 | 9.27E-14   | 0.47056926 |
| SH3PXD2A | turquoise | -0.4890992 | 1.62E-12   | 0.31430903 | 1.32E-05   | 0.73759991 |
| SH3KBP1  | turquoise | 0.20625352 | 0.00485218 | -0.245943  | 0.00073951 | -0.5459431 |
| SH3GL2   | turquoise | 0.61294174 | 1.81E-20   | -0.6995469 | 1.64E-28   | -0.632217  |
| SH3BP4   | turquoise | -0.6232863 | 2.68E-21   | 0.65194242 | 9.13E-24   | 0.3659125  |
| SH3BGRL2 | turquoise | 0.54820247 | 6.64E-16   | -0.6481458 | 2.01E-23   | -0.1280481 |
| SH3BGRL  | turquoise | 0.22220453 | 0.00236641 | 0.34560769 | 1.45E-06   | -0.6404214 |
| SH2D5    | turquoise | 0.47090837 | 1.34E-11   | -0.8526729 | 1.74E-53   | -0.351928  |
| SGTB     | turquoise | 0.66008205 | 1.62E-24   | -0.3511628 | 9.54E-07   | -0.5772135 |
| SGSM1    | turquoise | 0.44238349 | 2.89E-10   | -0.7778122 | 9.27E-39   | -0.3171177 |
| SGK223   | turquoise | 0.31245839 | 1.49E-05   | -0.494518  | 8.41E-13   | 0.13983821 |
| SGIP1    | turquoise | 0.62237107 | 3.18E-21   | -0.3938595 | 2.91E-08   | -0.7931028 |
| SFXN5    | turquoise | -0.6609359 | 1.35E-24   | 0.42641698 | 1.43E-09   | 0.64467333 |
| SFXN4    | turquoise | -0.3196842 | 9.18E-06   | -0.0046341 | 0.95008169 | 0.7234435  |
| SFXN1    | turquoise | 0.51447167 | 6.84E-14   | -0.1212799 | 0.10007715 | -0.6792721 |
| SF3B2    | turquoise | -0.4791816 | 5.20E-12   | 0.05652229 | 0.44475599 | 0.30741991 |
| SEZ6L2   | turquoise | 0.41365894 | 4.84E-09   | -0.8221595 | 1.19E-46   | -0.2068555 |
| SETX     | turquoise | -0.5506412 | 4.66E-16   | 0.39481072 | 2.68E-08   | 0.72146517 |
| SETD2    | turquoise | -0.407929  | 8.24E-09   | 0.36653024 | 2.88E-07   | 0.48869685 |
| SERTM1   | turquoise | 0.70361863 | 5.83E-29   | -0.6277013 | 1.16E-21   | -0.649086  |
| SERTAD1  | turquoise | -0.6482342 | 1.97E-23   | 0.45470321 | 7.94E-11   | 0.5155405  |
| SERPINI1 | turquoise | 0.62505286 | 1.92E-21   | -0.5230639 | 2.20E-14   | -0.8921089 |

|          |           |            |            |            |            |            |
|----------|-----------|------------|------------|------------|------------|------------|
| SERPING1 | turquoise | -0.5569407 | 1.83E-16   | 0.50999398 | 1.22E-13   | 0.2381587  |
| SERPINF1 | turquoise | 0.48809653 | 1.82E-12   | -0.5211418 | 2.85E-14   | -0.3097302 |
| SERPINB6 | turquoise | -0.6941029 | 6.37E-28   | 0.62880635 | 9.39E-22   | 0.79133164 |
| SERPINA3 | turquoise | -0.3488054 | 1.14E-06   | 0.25785239 | 0.00039483 | 0.16553997 |
| SERP2    | turquoise | 0.49774273 | 5.67E-13   | -0.3324943 | 3.76E-06   | -0.4999418 |
| SERINC3  | turquoise | 0.34149202 | 1.96E-06   | -0.3089897 | 1.87E-05   | -0.6711841 |
| SERINC1  | turquoise | 0.48943289 | 1.55E-12   | -0.1593356 | 0.03028298 | -0.8643799 |
| SERF2    | turquoise | -0.5981093 | 2.48E-19   | 0.45919165 | 4.89E-11   | 0.19084561 |
| SERAC1   | turquoise | 0.67488013 | 6.09E-26   | -0.6902718 | 1.63E-27   | -0.5244453 |
| 4-Sep    | turquoise | -0.4609125 | 4.06E-11   | 0.25662448 | 0.00042181 | 0.5863603  |
| 3-Sep    | turquoise | 0.55222808 | 3.69E-16   | -0.5201806 | 3.24E-14   | -0.3889587 |
| 2-Sep    | turquoise | -0.489786  | 1.49E-12   | 0.64812974 | 2.01E-23   | 0.62293063 |
| 15-Sep   | turquoise | 0.29654968 | 4.15E-05   | 0.26069911 | 0.00033833 | -0.7071866 |
| SEMA6C   | turquoise | -0.3016745 | 3.01E-05   | 0.0044686  | 0.95186268 | 0.69198754 |
| SEMA5B   | turquoise | 0.32665671 | 5.68E-06   | -0.7402752 | 2.20E-33   | -0.1418947 |
| SEMA4F   | turquoise | 0.51107909 | 1.06E-13   | -0.7502279 | 1.03E-34   | -0.6571026 |
| SELT     | turquoise | 0.62597922 | 1.61E-21   | -0.2509865 | 0.00056901 | -0.6585029 |
| SELENBP1 | turquoise | -0.6148638 | 1.28E-20   | 0.62527267 | 1.84E-21   | 0.36856079 |
| SEL1L    | turquoise | 0.73980733 | 2.54E-33   | -0.573088  | 1.53E-17   | -0.4476254 |
| SEH1L    | turquoise | 0.56182875 | 8.78E-17   | -0.6630459 | 8.53E-25   | -0.8215404 |
| SEC63    | turquoise | -0.3169374 | 1.11E-05   | 0.18246393 | 0.01292384 | 0.77968228 |
| SEC62    | turquoise | 0.50171153 | 3.47E-13   | -0.3583894 | 5.47E-07   | -0.5156669 |
| SEC61G   | turquoise | 0.61468736 | 1.32E-20   | -0.382002  | 8.07E-08   | -0.6897588 |
| SEC61A2  | turquoise | 0.58181282 | 3.79E-18   | -0.6868504 | 3.71E-27   | -0.6213475 |
| SEC24D   | turquoise | 0.64599976 | 3.12E-23   | -0.1592089 | 0.03041649 | -0.6036218 |
| SEC24C   | turquoise | -0.4511786 | 1.15E-10   | -0.106696  | 0.14831313 | 0.67081961 |
| SEC24B   | turquoise | 0.51292884 | 8.35E-14   | 0.16911449 | 0.02137944 | -0.5698515 |
| SEC23B   | turquoise | 0.24548081 | 0.00075728 | 0.19981397 | 0.00639328 | -0.6640555 |
| SEC14L2  | turquoise | -0.4250475 | 1.63E-09   | 0.38723551 | 5.17E-08   | 0.36253403 |
| SEC14L1  | turquoise | -0.4371524 | 4.92E-10   | 0.7505531  | 9.27E-35   | 0.56250129 |
| SEC11C   | turquoise | 0.17786863 | 0.01542583 | 0.28213835 | 9.99E-05   | -0.6174017 |
| SEC11A   | turquoise | -0.3891126 | 4.40E-08   | 0.83997094 | 1.82E-50   | 0.18601928 |
| SDHD     | turquoise | 0.27315791 | 0.00016858 | 0.26646954 | 0.00024606 | -0.5871898 |
| SDHB     | turquoise | 0.35513343 | 7.04E-07   | -0.1783309 | 0.01515631 | -0.8552609 |
| SDHAP2   | turquoise | -0.5057443 | 2.09E-13   | 0.37374753 | 1.60E-07   | 0.80428053 |
| SDHAF3   | turquoise | 0.56271275 | 7.67E-17   | -0.140372  | 0.05667985 | -0.5157842 |
| SDHAF1   | turquoise | 0.28212402 | 1.00E-04   | -0.6370631 | 1.88E-22   | -0.5308612 |
| SDHA     | turquoise | 0.39648733 | 2.31E-08   | -0.3347688 | 3.20E-06   | -0.7798271 |
| SDF2L1   | turquoise | -0.4638104 | 2.95E-11   | 0.24250961 | 0.00088127 | 0.68637643 |
| SDCCAG8  | turquoise | -0.4208578 | 2.45E-09   | 0.32163791 | 8.03E-06   | 0.65228626 |
| SDCCAG3  | turquoise | -0.5841102 | 2.61E-18   | 0.3790874  | 1.03E-07   | 0.76700462 |
| SDC2     | turquoise | -0.3646363 | 3.35E-07   | 0.06394463 | 0.3871862  | 0.74297247 |
| SDAD1    | turquoise | 0.52893911 | 9.98E-15   | -0.6270507 | 1.31E-21   | -0.5186877 |
| SCYL2    | turquoise | 0.44228981 | 2.92E-10   | 0.09085512 | 0.21872223 | -0.6465521 |
| SCPEP1   | turquoise | 0.36015678 | 4.77E-07   | -0.0804683 | 0.27622614 | -0.716481  |
| SCOC     | turquoise | 0.66217894 | 1.03E-24   | -0.3993325 | 1.79E-08   | -0.860084  |

|           |           |            |            |            |            |            |
|-----------|-----------|------------|------------|------------|------------|------------|
| SCO1      | turquoise | 0.46470884 | 2.67E-11   | -0.0395898 | 0.59262287 | -0.7072204 |
| SCN3B     | turquoise | 0.52335169 | 2.12E-14   | -0.5930379 | 5.90E-19   | -0.8112006 |
| SCN2B     | turquoise | 0.61301811 | 1.78E-20   | -0.694994  | 5.11E-28   | -0.8106011 |
| SCIN      | turquoise | -0.2971838 | 3.99E-05   | 0.50773869 | 1.62E-13   | 0.10466001 |
| SCHIP1    | turquoise | 0.57868283 | 6.29E-18   | -0.4642781 | 2.80E-11   | -0.8448499 |
| SCG5      | turquoise | 0.67170271 | 1.25E-25   | -0.7910138 | 6.60E-41   | -0.6523717 |
| SCG3      | turquoise | 0.40884045 | 7.58E-09   | -0.1295425 | 0.07884312 | -0.5002003 |
| SCG2      | turquoise | 0.71177386 | 6.94E-30   | -0.7079266 | 1.91E-29   | -0.7113884 |
| SCFD1     | turquoise | 0.59720619 | 2.90E-19   | -0.2210122 | 0.00250124 | -0.7440308 |
| SCARB2    | turquoise | 0.3289557  | 4.83E-06   | -0.1542525 | 0.03604634 | -0.5049497 |
| SCARA3    | turquoise | -0.268571  | 0.00021872 | 0.61153828 | 2.33E-20   | 0.33675334 |
| SCAMP3    | turquoise | -0.5346526 | 4.55E-15   | 0.01291234 | 0.86151679 | 0.68403573 |
| SCAMP1    | turquoise | 0.60336414 | 9.97E-20   | -0.7086044 | 1.60E-29   | -0.3371932 |
| SATB2-AS1 | turquoise | 0.68526825 | 5.41E-27   | -0.7030088 | 6.81E-29   | -0.5032718 |
| SATB2     | turquoise | 0.64074499 | 9.03E-23   | -0.5404426 | 2.02E-15   | -0.6548918 |
| SATB1     | turquoise | 0.39514054 | 2.60E-08   | -0.4380038 | 4.52E-10   | -0.7395098 |
| SAT1      | turquoise | -0.4062922 | 9.57E-09   | 0.71689156 | 1.76E-30   | 0.16203152 |
| SART1     | turquoise | -0.450746  | 1.21E-10   | 0.31932716 | 9.40E-06   | 0.69269547 |
| SARS      | turquoise | 0.28734144 | 7.32E-05   | -0.7094913 | 1.27E-29   | -0.4118909 |
| SARAF     | turquoise | 0.61700972 | 8.61E-21   | -0.3710304 | 2.00E-07   | -0.8577716 |
| SAPCD2    | turquoise | -0.4384331 | 4.33E-10   | 0.35211485 | 8.87E-07   | 0.54232392 |
| SAP18     | turquoise | -0.4326051 | 7.77E-10   | 0.53919548 | 2.41E-15   | 0.52996106 |
| SALL2     | turquoise | -0.5633776 | 6.93E-17   | 0.69323091 | 7.90E-28   | 0.33232312 |
| SAFB2     | turquoise | -0.6228487 | 2.91E-21   | 0.33517421 | 3.11E-06   | 0.33372515 |
| SACS      | turquoise | 0.73045135 | 3.98E-32   | -0.5309389 | 7.59E-15   | -0.4182229 |
| SACM1L    | turquoise | 0.57914862 | 5.84E-18   | -0.3276268 | 5.31E-06   | -0.1354208 |
| SAC3D1    | turquoise | -0.4221885 | 2.15E-09   | -0.2182236 | 0.0028442  | 0.57634211 |
| S1PR3     | turquoise | -0.3883444 | 4.70E-08   | 0.75289298 | 4.41E-35   | 0.13494461 |
| S100PBP   | turquoise | -0.6180689 | 7.08E-21   | 0.68539117 | 5.26E-27   | 0.66344736 |
| S100A6    | turquoise | -0.4522382 | 1.03E-10   | 0.51294438 | 8.34E-14   | 0.41474336 |
| S100A4    | turquoise | -0.3211938 | 8.28E-06   | 0.60804575 | 4.36E-20   | 0.26529667 |
| S100A13   | turquoise | -0.542524  | 1.50E-15   | 0.4362231  | 5.41E-10   | 0.72529266 |
| S100A10   | turquoise | -0.398237  | 1.98E-08   | 0.65355172 | 6.51E-24   | 0.15974881 |
| RYR2      | turquoise | 0.18276388 | 0.01277367 | -0.6917678 | 1.13E-27   | -0.177567  |
| RYBP      | turquoise | -0.2338271 | 0.00135833 | 0.07270325 | 0.32537575 | 0.57029591 |
| RXRA      | turquoise | -0.6885763 | 2.45E-27   | 0.71855791 | 1.12E-30   | 0.70928742 |
| RXFP1     | turquoise | 0.70172358 | 9.45E-29   | -0.5185146 | 4.03E-14   | -0.698093  |
| RWDD2A    | turquoise | 0.68538597 | 5.26E-27   | -0.5941115 | 4.92E-19   | -0.6692126 |
| RUNX1T1   | turquoise | 0.36890969 | 2.38E-07   | -0.4328236 | 7.60E-10   | -0.4311785 |
| RUNDC1    | turquoise | 0.67634068 | 4.36E-26   | -0.7440051 | 7.10E-34   | -0.6499295 |
| RUFY3     | turquoise | 0.64618074 | 3.00E-23   | -0.5679137 | 3.45E-17   | -0.8393754 |
| RTN4IP1   | turquoise | 0.74094647 | 1.80E-33   | -0.6583608 | 2.35E-24   | -0.6154171 |
| RTN4      | turquoise | 0.60463007 | 7.99E-20   | -0.4815077 | 3.97E-12   | -0.8982098 |
| RTN3      | turquoise | 0.54869203 | 6.19E-16   | -0.8196555 | 3.78E-46   | -0.5034297 |
| RTN1      | turquoise | 0.61338187 | 1.67E-20   | -0.6367138 | 2.01E-22   | -0.8402736 |
| RTCA      | turquoise | 0.65107279 | 1.09E-23   | -0.2705306 | 0.00019581 | -0.7771532 |



|           |           |            |            |            |            |            |
|-----------|-----------|------------|------------|------------|------------|------------|
| RSRC1     | turquoise | 0.52655559 | 1.38E-14   | -0.1411739 | 0.05526738 | -0.748786  |
| RSPO2     | turquoise | 0.71869698 | 1.08E-30   | -0.6253184 | 1.83E-21   | -0.756531  |
| RSL24D1   | turquoise | 0.72005817 | 7.40E-31   | -0.6093109 | 3.48E-20   | -0.4570344 |
| RRBP1     | turquoise | -0.7014786 | 1.01E-28   | 0.49306524 | 1.00E-12   | 0.74730483 |
| RRAGC     | turquoise | -0.4345781 | 6.38E-10   | 0.31533882 | 1.23E-05   | 0.7261629  |
| RRAGB     | turquoise | 0.65097525 | 1.12E-23   | -0.3613827 | 4.33E-07   | -0.7041445 |
| RPSA      | turquoise | -0.5466782 | 8.29E-16   | 0.5698606  | 2.55E-17   | 0.29939382 |
| RPS9      | turquoise | -0.4971037 | 6.13E-13   | 0.68536569 | 5.29E-27   | 0.20957464 |
| RPS6KC1   | turquoise | 0.64684385 | 2.62E-23   | -0.5317997 | 6.75E-15   | -0.7267003 |
| RPS6KA1   | turquoise | -0.5060238 | 2.02E-13   | 0.38058458 | 9.10E-08   | 0.73276217 |
| RPS5      | turquoise | -0.4090153 | 7.45E-09   | 0.5413684  | 1.77E-15   | -0.0275076 |
| RPS3      | turquoise | -0.5951601 | 4.11E-19   | 0.70974028 | 1.19E-29   | 0.1737205  |
| RPS19     | turquoise | -0.6126333 | 1.91E-20   | 0.606809   | 5.43E-20   | 0.49655725 |
| RPS16     | turquoise | -0.4653995 | 2.48E-11   | 0.60800114 | 4.40E-20   | 0.69024846 |
| RPS14     | turquoise | -0.4946099 | 8.32E-13   | 0.41054936 | 6.47E-09   | 0.73800423 |
| RPRML     | turquoise | 0.38918367 | 4.38E-08   | -0.7764729 | 1.50E-38   | -0.2211237 |
| RPRM      | turquoise | 0.19289393 | 0.00852316 | -0.2735592 | 0.00016475 | 0.1892386  |
| RPRD2     | turquoise | 0.61462683 | 1.33E-20   | -0.5198807 | 3.37E-14   | -0.2327108 |
| RPRD1B    | turquoise | 0.58772111 | 1.44E-18   | -0.039205  | 0.5962261  | -0.6265164 |
| RPP40     | turquoise | 0.55517483 | 2.39E-16   | -0.7103111 | 1.02E-29   | -0.2734626 |
| RPL4      | turquoise | -0.4559359 | 6.95E-11   | 0.42393321 | 1.82E-09   | 0.27601843 |
| RPL23AP7  | turquoise | -0.4828612 | 3.39E-12   | 0.46424142 | 2.81E-11   | 0.7366482  |
| RPL23AP32 | turquoise | -0.3968254 | 2.24E-08   | 0.14882096 | 0.04320355 | 0.71477301 |
| RPL14     | turquoise | -0.367127  | 2.74E-07   | 0.45643202 | 6.59E-11   | 0.68829363 |
| RPL13P5   | turquoise | -0.4220356 | 2.19E-09   | 0.32346783 | 7.08E-06   | 0.86410959 |
| RPL13AP3  | turquoise | -0.64429   | 4.42E-23   | 0.46262347 | 3.36E-11   | 0.294929   |
| RPL13A    | turquoise | -0.5822105 | 3.56E-18   | 0.58214084 | 3.60E-18   | 0.23003942 |
| RPL13     | turquoise | -0.3280811 | 5.14E-06   | 0.16859486 | 0.0217881  | 0.71465254 |
| RPL11     | turquoise | -0.6050636 | 7.40E-20   | 0.69437768 | 5.96E-28   | 0.37023905 |
| RPF1      | turquoise | 0.63844641 | 1.43E-22   | -0.0819304 | 0.26756563 | -0.468782  |
| RPE       | turquoise | 0.48818537 | 1.80E-12   | -0.1506199 | 0.04071154 | -0.7638565 |
| RPAP3     | turquoise | 0.55024752 | 4.93E-16   | -0.2412746 | 0.0009381  | -0.8005868 |
| RPA3      | turquoise | 0.60453979 | 8.11E-20   | -0.3998245 | 1.72E-08   | -0.7836805 |
| ROM1      | turquoise | -0.749809  | 1.17E-34   | 0.53110884 | 7.42E-15   | 0.71946908 |
| ROBO3     | turquoise | -0.6693095 | 2.14E-25   | 0.6006211  | 1.61E-19   | 0.49539058 |
| ROBO2     | turquoise | 0.6595894  | 1.80E-24   | -0.7146395 | 3.23E-30   | -0.6669742 |
| ROBO1     | turquoise | 0.58299092 | 3.13E-18   | -0.134046  | 0.06889877 | -0.1325094 |
| RNY1      | turquoise | -0.5527593 | 3.41E-16   | 0.37227152 | 1.81E-07   | 0.81610162 |
| RNVU1-7   | turquoise | -0.2611473 | 0.00033014 | 0.30521917 | 2.39E-05   | 0.44946662 |
| RNU6-1    | turquoise | -0.5750037 | 1.13E-17   | 0.45325341 | 9.26E-11   | 0.819275   |
| RNU4-2    | turquoise | -0.3065721 | 2.19E-05   | 0.3252693  | 6.25E-06   | 0.62354283 |
| RNPEPL1   | turquoise | -0.5115803 | 9.94E-14   | 0.20839172 | 0.00441969 | 0.73680677 |
| RNFT2     | turquoise | 0.52648986 | 1.39E-14   | -0.8228791 | 8.51E-47   | -0.3648853 |
| RNF41     | turquoise | 0.49904111 | 4.83E-13   | -0.8006455 | 1.42E-42   | -0.6950196 |
| RNF4      | turquoise | 0.53056521 | 7.99E-15   | -0.0638583 | 0.38782883 | -0.5727845 |
| RNF38     | turquoise | 0.64824484 | 1.97E-23   | -0.2645055 | 0.00027445 | -0.5903137 |

|          |           |            |           |            |            |            |
|----------|-----------|------------|-----------|------------|------------|------------|
| RNF34    | turquoise | 0.60999669 | 3.08E-20  | -0.4851772 | 2.58E-12   | -0.3454315 |
| RNF219   | turquoise | 0.66571861 | 4.75E-25  | -0.7319823 | 2.55E-32   | -0.4275865 |
| RNF175   | turquoise | 0.69382414 | 6.83E-28  | -0.7913686 | 5.75E-41   | -0.5630789 |
| RNF170   | turquoise | 0.55276877 | 3.41E-16  | -0.1715768 | 0.01953171 | -0.4885693 |
| RNF144A  | turquoise | -0.466903  | 2.10E-11  | 0.37325412 | 1.67E-07   | 0.48391161 |
| RNF14    | turquoise | 0.66239112 | 9.84E-25  | -0.4259212 | 1.50E-09   | -0.629881  |
| RNF135   | turquoise | -0.508642  | 1.45E-13  | 0.81244658 | 9.58E-45   | 0.65429834 |
| RNF114   | turquoise | -0.5684159 | 3.19E-17  | 0.80854961 | 5.19E-44   | 0.64967695 |
| RNF103   | turquoise | 0.39151938 | 3.57E-08  | 0.12341469 | 0.09419978 | -0.6781203 |
| RND2     | turquoise | -0.707501  | 2.14E-29  | 0.39053826 | 3.89E-08   | 0.62027853 |
| RNASET2  | turquoise | -0.4700184 | 1.48E-11  | 0.55406452 | 2.81E-16   | 0.60775759 |
| RNASEH2C | turquoise | -0.5052217 | 2.23E-13  | 0.19308865 | 0.00845553 | 0.34372061 |
| RNASEH2B | turquoise | 0.59366079 | 5.31E-19  | -0.5013763 | 3.62E-13   | -0.0321381 |
| RMI2     | turquoise | 0.49809957 | 5.43E-13  | -0.6441916 | 4.51E-23   | -0.561611  |
| RIT2     | turquoise | 0.63701731 | 1.90E-22  | -0.7170126 | 1.70E-30   | -0.4449225 |
| RIPPLY2  | turquoise | 0.63595187 | 2.34E-22  | -0.6234704 | 2.59E-21   | -0.6505258 |
| RIPK1    | turquoise | -0.5760119 | 9.65E-18  | 0.4869965  | 2.08E-12   | 0.71585118 |
| RIMS4    | turquoise | -0.4636527 | 3.00E-11  | -0.0492842 | 0.50528389 | 0.35816999 |
| RIMS3    | turquoise | 0.4562075  | 6.75E-11  | -0.6381078 | 1.53E-22   | -0.3518422 |
| RIMKLB   | turquoise | -0.1722202 | 0.0190724 | 0.32327024 | 7.18E-06   | 0.66948059 |
| RIMKLA   | turquoise | 0.66553954 | 4.94E-25  | -0.7238283 | 2.60E-31   | -0.4231394 |
| RIMBP2   | turquoise | 0.7061918  | 3.00E-29  | -0.7143282 | 3.51E-30   | -0.7132618 |
| RIC3     | turquoise | 0.62098416 | 4.12E-21  | -0.3754582 | 1.39E-07   | -0.7355368 |
| RHPN2    | turquoise | -0.333541  | 3.49E-06  | 0.68354707 | 8.14E-27   | 0.51979337 |
| RHPN1    | turquoise | -0.3616455 | 4.24E-07  | -0.2501454 | 0.00059465 | 0.42323143 |
| RHOQ     | turquoise | -0.5719481 | 1.84E-17  | 0.70462918 | 4.49E-29   | 0.50772    |
| RHOJ     | turquoise | -0.6217884 | 3.55E-21  | 0.77431726 | 3.24E-38   | 0.68050602 |
| RHOG     | turquoise | -0.6652531 | 5.26E-25  | 0.38207415 | 8.03E-08   | 0.14354896 |
| RHOC     | turquoise | -0.6822051 | 1.12E-26  | 0.71438614 | 3.46E-30   | 0.53433934 |
| RHNO1    | turquoise | 0.4576009  | 5.81E-11  | -0.2926908 | 5.28E-05   | -0.410423  |
| RHBDF2   | turquoise | -0.5684538 | 3.17E-17  | 0.71916543 | 9.46E-31   | 0.5624144  |
| RHBDD1   | turquoise | -0.5200469 | 3.29E-14  | 0.73120318 | 3.20E-32   | 0.3881701  |
| RGS7BP   | turquoise | 0.61673866 | 9.05E-21  | -0.6163964 | 9.64E-21   | -0.73392   |
| RGS7     | turquoise | 0.67419075 | 7.13E-26  | -0.6502895 | 1.29E-23   | -0.8382766 |
| RGS4     | turquoise | 0.67436996 | 6.84E-26  | -0.6529265 | 7.43E-24   | -0.8052022 |
| RGS2     | turquoise | 0.41191566 | 5.70E-09  | -0.3924895 | 3.28E-08   | -0.1820865 |
| RGS11    | turquoise | -0.4637786 | 2.96E-11  | 0.09968228 | 0.17701572 | 0.7531991  |
| RGR      | turquoise | -0.2921841 | 5.45E-05  | 0.48272959 | 3.44E-12   | 0.27168226 |
| RGMA     | turquoise | -0.6555907 | 4.24E-24  | 0.45663228 | 6.45E-11   | 0.47055782 |
| RGL3     | turquoise | -0.4830277 | 3.32E-12  | 0.37008652 | 2.16E-07   | 0.75990759 |
| RGL2     | turquoise | -0.5557825 | 2.18E-16  | 0.74288724 | 9.99E-34   | 0.43473981 |
| RFXANK   | turquoise | -0.5631724 | 7.15E-17  | 0.42789475 | 1.24E-09   | 0.52381883 |
| RFX3     | turquoise | 0.60751604 | 4.79E-20  | -0.1513644 | 0.03971609 | -0.6506781 |
| RFX2     | turquoise | -0.4881137 | 1.82E-12  | 0.65653971 | 3.46E-24   | 0.5210439  |
| RFWD2    | turquoise | 0.55960749 | 1.23E-16  | -0.1765764 | 0.01620153 | -0.7315699 |
| RFTN1    | turquoise | 0.55019303 | 4.97E-16  | -0.7066934 | 2.63E-29   | -0.2490601 |

|          |           |            |            |            |            |            |
|----------|-----------|------------|------------|------------|------------|------------|
| RFPL2    | turquoise | 0.55652883 | 1.95E-16   | -0.4221165 | 2.17E-09   | -0.3280292 |
| REPS2    | turquoise | 0.70809736 | 1.83E-29   | -0.6468252 | 2.63E-23   | -0.7928398 |
| REPS1    | turquoise | 0.62107221 | 4.06E-21   | -0.2596637 | 0.00035795 | -0.596901  |
| REPIN1   | turquoise | -0.4777444 | 6.14E-12   | 0.66160817 | 1.17E-24   | 0.63640283 |
| RENBP    | turquoise | -0.3716925 | 1.90E-07   | 0.0689076  | 0.35133626 | 0.11396518 |
| REEP5    | turquoise | 0.71838716 | 1.17E-30   | -0.7095262 | 1.26E-29   | -0.6181423 |
| REEP1    | turquoise | 0.64199535 | 7.03E-23   | -0.8581861 | 6.91E-55   | -0.5625874 |
| REC8     | turquoise | -0.3067083 | 2.17E-05   | -0.1911243 | 0.00916009 | 0.43946174 |
| RDX      | turquoise | -0.4043123 | 1.15E-08   | 0.81311486 | 7.14E-45   | 0.12092828 |
| RDH13    | turquoise | -0.3651886 | 3.20E-07   | -0.0687495 | 0.3524448  | 0.74926472 |
| RCOR3    | turquoise | 0.61338562 | 1.67E-20   | -0.4007763 | 1.58E-08   | -0.5135624 |
| RCN2     | turquoise | 0.5070352  | 1.78E-13   | -0.0710576 | 0.33647509 | -0.811696  |
| RCAN2    | turquoise | 0.65828485 | 2.39E-24   | -0.7761449 | 1.69E-38   | -0.6734318 |
| RBSN     | turquoise | 0.64767061 | 2.21E-23   | -0.4658793 | 2.35E-11   | -0.4223625 |
| RBPJ     | turquoise | -0.4300861 | 9.98E-10   | 0.55942729 | 1.26E-16   | 0.68456022 |
| RBP4     | turquoise | 0.55241651 | 3.59E-16   | -0.626804  | 1.38E-21   | -0.7651953 |
| RBMS2    | turquoise | -0.3200679 | 8.94E-06   | 0.5355286  | 4.03E-15   | 0.59289551 |
| RBM4B    | turquoise | -0.6396597 | 1.12E-22   | 0.53370959 | 5.18E-15   | 0.46307996 |
| RBM39    | turquoise | -0.6335484 | 3.75E-22   | 0.4091879  | 7.34E-09   | 0.80381913 |
| RBM3     | turquoise | 0.52577963 | 1.53E-14   | -0.3656362 | 3.09E-07   | -0.4891867 |
| RBM26    | turquoise | 0.41144865 | 5.95E-09   | 0.11517159 | 0.11850376 | -0.7249885 |
| RBM24    | turquoise | 0.71260112 | 5.57E-30   | -0.5222806 | 2.45E-14   | -0.7456194 |
| RBM17    | turquoise | -0.5414469 | 1.75E-15   | 0.79115122 | 6.26E-41   | 0.6951723  |
| RBM11    | turquoise | 0.7507354  | 8.75E-35   | -0.5810028 | 4.33E-18   | -0.7487792 |
| RBM10    | turquoise | -0.3260532 | 5.92E-06   | 0.06501088 | 0.37930329 | 0.79721858 |
| RBFOX1   | turquoise | 0.4931179  | 9.97E-13   | -0.7816895 | 2.25E-39   | -0.6506527 |
| RBBP7    | turquoise | 0.54940594 | 5.58E-16   | -0.1590824 | 0.03055032 | -0.7615329 |
| RBBP5    | turquoise | 0.61188053 | 2.19E-20   | -0.3324932 | 3.76E-06   | -0.6963595 |
| RASSF7   | turquoise | -0.3556421 | 6.77E-07   | -0.0155976 | 0.83310127 | 0.75204222 |
| RASSF4   | turquoise | -0.4262121 | 1.46E-09   | 0.31643663 | 1.14E-05   | 0.77867586 |
| RASSF2   | turquoise | -0.6682239 | 2.73E-25   | 0.55090555 | 4.48E-16   | 0.42534513 |
| RASSF1   | turquoise | -0.5474753 | 7.38E-16   | 0.4941058  | 8.84E-13   | 0.61848486 |
| RASL12   | turquoise | -0.54411   | 1.20E-15   | 0.62121362 | 3.95E-21   | 0.67530775 |
| RASL11B  | turquoise | 0.61694318 | 8.72E-21   | -0.7334436 | 1.67E-32   | -0.6359852 |
| RASGRP1  | turquoise | 0.69746677 | 2.77E-28   | -0.6204292 | 4.57E-21   | -0.4627163 |
| RASD1    | turquoise | 0.21461031 | 0.00335175 | -0.211707  | 0.00381735 | -0.6014939 |
| RASA1    | turquoise | 0.67670205 | 4.01E-26   | -0.4901295 | 1.43E-12   | -0.7471076 |
| RARRES3  | turquoise | -0.5926838 | 6.26E-19   | 0.55990542 | 1.17E-16   | 0.41437197 |
| RARRES2  | turquoise | -0.6144117 | 1.39E-20   | 0.47812235 | 5.88E-12   | 0.56243279 |
| RAPH1    | turquoise | 0.62114382 | 4.00E-21   | -0.3553764 | 6.91E-07   | -0.618818  |
| RAPGEF5  | turquoise | 0.45195039 | 1.06E-10   | -0.3287892 | 4.89E-06   | -0.615832  |
| RAPGEF3  | turquoise | -0.6501663 | 1.32E-23   | 0.46276992 | 3.31E-11   | 0.84877132 |
| RAPGEF2  | turquoise | 0.65973852 | 1.75E-24   | -0.4151181 | 4.22E-09   | -0.7411269 |
| RAPGEF1  | turquoise | -0.5132294 | 8.03E-14   | 0.48690414 | 2.10E-12   | 0.73018593 |
| RAP2A    | turquoise | 0.58475408 | 2.35E-18   | -0.2948945 | 4.61E-05   | -0.7337472 |
| RAP1GAP2 | turquoise | 0.43375336 | 6.93E-10   | -0.5781783 | 6.82E-18   | -0.6393868 |

|           |           |            |          |            |            |            |
|-----------|-----------|------------|----------|------------|------------|------------|
| RANBP9    | turquoise | 0.74145357 | 1.54E-33 | -0.3611108 | 4.42E-07   | -0.4014042 |
| RANBP6    | turquoise | 0.61972541 | 5.21E-21 | -0.2365473 | 0.00118813 | -0.7393677 |
| RANBP2    | turquoise | 0.72902603 | 5.98E-32 | -0.3228874 | 7.37E-06   | -0.6374413 |
| RANBP1    | turquoise | 0.62966446 | 7.96E-22 | -0.4570432 | 6.17E-11   | -0.4813426 |
| RAMP3     | turquoise | -0.4353108 | 5.93E-10 | 0.15984257 | 0.02975386 | 0.69111596 |
| RALYL     | turquoise | 0.56717883 | 3.87E-17 | -0.7139137 | 3.92E-30   | -0.5455471 |
| RALY      | turquoise | -0.6356251 | 2.50E-22 | 0.20141262 | 0.00597461 | 0.41063845 |
| RALGDS    | turquoise | -0.5908947 | 8.46E-19 | 0.35898152 | 5.23E-07   | 0.62991984 |
| RALGAPA1  | turquoise | 0.58803105 | 1.36E-18 | -0.1539406 | 0.03642834 | -0.5573877 |
| RALB      | turquoise | 0.42304816 | 1.98E-09 | -0.0285699 | 0.69946903 | -0.7748306 |
| RALA      | turquoise | -0.3903797 | 3.95E-08 | 0.51688433 | 4.99E-14   | 0.6301878  |
| RAI14     | turquoise | -0.6781872 | 2.85E-26 | 0.69490299 | 5.23E-28   | 0.62220688 |
| RAF1      | turquoise | -0.4031062 | 1.28E-08 | 0.58851792 | 1.26E-18   | 0.66435091 |
| RAD54L2   | turquoise | -0.4533273 | 9.19E-11 | 0.16710653 | 0.02299611 | 0.84547529 |
| RAD51C    | turquoise | 0.64228138 | 6.63E-23 | -0.4519282 | 1.07E-10   | -0.7502152 |
| RAD23B    | turquoise | 0.61022292 | 2.95E-20 | -0.4622329 | 3.51E-11   | -0.7221436 |
| RABGGTB   | turquoise | 0.43514855 | 6.03E-10 | -0.0066902 | 0.92798431 | -0.3322466 |
| RABGEF1   | turquoise | 0.64677104 | 2.66E-23 | -0.4434095 | 2.60E-10   | -0.0649204 |
| RABGAP1   | turquoise | -0.4052219 | 1.06E-08 | 0.02829655 | 0.70220724 | 0.63215488 |
| RABEPK    | turquoise | 0.4585169  | 5.26E-11 | -0.4286407 | 1.15E-09   | -0.0464181 |
| RAB8A     | turquoise | -0.5414898 | 1.74E-15 | 0.65768341 | 2.71E-24   | 0.58304752 |
| RAB6B     | turquoise | 0.50093024 | 3.82E-13 | -0.7526212 | 4.81E-35   | -0.3582528 |
| RAB6A     | turquoise | 0.60162193 | 1.35E-19 | -0.4111452 | 6.12E-09   | -0.9011705 |
| RAB5A     | turquoise | 0.34652107 | 1.35E-06 | 0.12060932 | 0.10198189 | -0.7749362 |
| RAB40C    | turquoise | 0.41417385 | 4.61E-09 | -0.7331695 | 1.81E-32   | -0.0669739 |
| RAB3IP    | turquoise | -0.3588173 | 5.29E-07 | 0.29838326 | 3.70E-05   | 0.43078247 |
| RAB3GAP2  | turquoise | 0.55278873 | 3.40E-16 | -0.4175363 | 3.36E-09   | -0.8165877 |
| RAB39B    | turquoise | 0.80314061 | 5.08E-43 | -0.4039814 | 1.18E-08   | -0.5637476 |
| RAB34     | turquoise | -0.5005505 | 4.01E-13 | 0.51414595 | 7.13E-14   | 0.55425093 |
| RAB31     | turquoise | -0.6059268 | 6.35E-20 | 0.81965501 | 3.78E-46   | 0.67860217 |
| RAB24     | turquoise | -0.3200915 | 8.93E-06 | -0.2771295 | 0.00013405 | 0.47962249 |
| RAB22A    | turquoise | 0.73538377 | 9.46E-33 | -0.5027397 | 3.05E-13   | -0.6649699 |
| RAB18     | turquoise | 0.57793095 | 7.10E-18 | -0.1000525 | 0.17540493 | -0.6559365 |
| RAB15     | turquoise | 0.53497231 | 4.35E-15 | -0.6953525 | 4.68E-28   | -0.5500086 |
| RAB13     | turquoise | -0.5815434 | 3.96E-18 | 0.46837152 | 1.78E-11   | 0.84165274 |
| RAB11FIP4 | turquoise | -0.4134476 | 4.94E-09 | -0.027741  | 0.7077841  | 0.67810216 |
| RAB11FIP2 | turquoise | 0.52379486 | 2.00E-14 | -0.1887729 | 0.01007149 | -0.8263156 |
| RAB11A    | turquoise | 0.6956647  | 4.33E-28 | -0.5996123 | 1.92E-19   | -0.5431894 |
| R3HDM1    | turquoise | 0.70516726 | 3.91E-29 | -0.6368289 | 1.97E-22   | -0.7392985 |
| QRICH1    | turquoise | 0.57993491 | 5.14E-18 | -0.2551193 | 0.0004572  | -0.662393  |
| QPRT      | turquoise | -0.3865065 | 5.51E-08 | 0.29592472 | 4.32E-05   | 0.73184002 |
| QPCT      | turquoise | 0.54318429 | 1.37E-15 | -0.4583488 | 5.36E-11   | -0.8621874 |
| QARS      | turquoise | -0.3203145 | 8.79E-06 | 0.06047202 | 0.41353867 | 0.76885766 |
| PYROXD2   | turquoise | -0.5847893 | 2.33E-18 | 0.51699123 | 4.92E-14   | 0.74525257 |
| PYGM      | turquoise | -0.5375501 | 3.04E-15 | 0.47257681 | 1.11E-11   | 0.36992649 |
| PYGL      | turquoise | -0.4862781 | 2.26E-12 | 0.66819366 | 2.75E-25   | 0.25977244 |

|         |           |            |           |            |            |            |
|---------|-----------|------------|-----------|------------|------------|------------|
| PXYLP1  | turquoise | 0.5215758  | 2.69E-14  | -0.3272314 | 5.46E-06   | -0.8245912 |
| PWP1    | turquoise | 0.60827966 | 4.18E-20  | -0.4165066 | 3.70E-09   | -0.6844259 |
| PUM2    | turquoise | 0.58744726 | 1.50E-18  | -0.3387627 | 2.40E-06   | -0.7406446 |
| PTTG1IP | turquoise | -0.5656049 | 4.93E-17  | 0.80470006 | 2.65E-43   | 0.59644    |
| PTTG1   | turquoise | 0.57669581 | 8.65E-18  | -0.6671215 | 3.48E-25   | -0.1677091 |
| PTS     | turquoise | 0.56476573 | 5.61E-17  | -0.3171807 | 1.09E-05   | -0.8508849 |
| PTRH2   | turquoise | 0.5996609  | 1.90E-19  | -0.4746665 | 8.74E-12   | -0.6440821 |
| PTRF    | turquoise | -0.5770304 | 8.20E-18  | 0.58193724 | 3.72E-18   | 0.80166011 |
| PTPRT   | turquoise | 0.55245959 | 3.57E-16  | -0.5813369 | 4.10E-18   | -0.7223829 |
| PTPRO   | turquoise | 0.65428002 | 5.59E-24  | -0.7733978 | 4.49E-38   | -0.2843049 |
| PTPRN2  | turquoise | 0.27196205 | 0.0001805 | -0.2977287 | 3.86E-05   | -0.8415031 |
| PTPRK   | turquoise | 0.44985736 | 1.33E-10  | -0.2548415 | 0.00046403 | -0.7490588 |
| PTPRE   | turquoise | 0.39602122 | 2.41E-08  | -0.2194049 | 0.00269403 | -0.6850608 |
| PTPRA   | turquoise | -0.2948334 | 4.62E-05  | 0.03954343 | 0.5930562  | 0.72698975 |
| PTPN4   | turquoise | 0.62803108 | 1.09E-21  | -0.6962252 | 3.77E-28   | -0.3763287 |
| PTPN3   | turquoise | 0.63938915 | 1.18E-22  | -0.710517  | 9.68E-30   | -0.5793154 |
| PTOV1   | turquoise | -0.5373676 | 3.12E-15  | 0.00800279 | 0.91390555 | 0.25654877 |
| PTH2R   | turquoise | 0.607108   | 5.15E-20  | -0.7564384 | 1.41E-35   | -0.517429  |
| PTH1R   | turquoise | -0.612355  | 2.01E-20  | 0.60301231 | 1.06E-19   | 0.85921738 |
| PTGR1   | turquoise | 0.48075006 | 4.33E-12  | -0.0857142 | 0.24601897 | -0.7307702 |
| PTGFRN  | turquoise | 0.60306271 | 1.05E-19  | -0.6037076 | 9.39E-20   | -0.4890408 |
| PTGES3  | turquoise | 0.38292585 | 7.47E-08  | 0.12540809 | 0.08896275 | -0.2868428 |
| PTDSS2  | turquoise | -0.6609271 | 1.35E-24  | 0.21334941 | 0.00354727 | 0.6835928  |
| PTBP1   | turquoise | -0.626285  | 1.52E-21  | 0.62140637 | 3.81E-21   | 0.84951782 |
| PTAR1   | turquoise | -0.5154213 | 6.04E-14  | 0.78766852 | 2.39E-40   | 0.70006864 |
| PSMG4   | turquoise | 0.55252731 | 3.53E-16  | -0.6519896 | 9.04E-24   | -0.6783329 |
| PSMG1   | turquoise | 0.69894147 | 1.91E-28  | -0.5367583 | 3.39E-15   | -0.7763473 |
| PSMD7   | turquoise | 0.48194209 | 3.77E-12  | -0.1269701 | 0.08502377 | -0.6897365 |
| PSMD6   | turquoise | 0.44110681 | 3.29E-10  | -0.0754025 | 0.30768722 | -0.8247356 |
| PSMD14  | turquoise | 0.55173368 | 3.97E-16  | -0.2607788 | 0.00033686 | -0.8816134 |
| PSMD12  | turquoise | 0.5050189  | 2.29E-13  | -0.1360259 | 0.06486277 | -0.7496363 |
| PSMD10  | turquoise | 0.43772265 | 4.65E-10  | -0.0762433 | 0.30230894 | -0.8504468 |
| PSMD1   | turquoise | 0.52014874 | 3.25E-14  | -0.5635405 | 6.76E-17   | -0.7301219 |
| PSMC6   | turquoise | 0.52792962 | 1.14E-14  | -0.1617134 | 0.02786893 | -0.7785979 |
| PSMC2   | turquoise | 0.51629487 | 5.39E-14  | -0.1373158 | 0.06233908 | -0.841805  |
| PSMC1   | turquoise | 0.50596753 | 2.03E-13  | -0.757433  | 1.02E-35   | -0.1402552 |
| PSMB8   | turquoise | -0.4853158 | 2.54E-12  | 0.56313899 | 7.19E-17   | 0.62359737 |
| PSMB5   | turquoise | 0.39415003 | 2.84E-08  | -0.3084116 | 1.95E-05   | -0.723136  |
| PSMB4   | turquoise | 0.39583828 | 2.45E-08  | -0.5061545 | 1.99E-13   | -0.3443835 |
| PSMB2   | turquoise | 0.2905602  | 6.02E-05  | -0.5648138 | 5.56E-17   | -0.7207503 |
| PSMB10  | turquoise | -0.4321381 | 8.14E-10  | 0.2374773  | 0.00113457 | 0.81030507 |
| PSMA6   | turquoise | 0.70934761 | 1.32E-29  | -0.3491988 | 1.11E-06   | -0.613107  |
| PSMA5   | turquoise | 0.56368188 | 6.62E-17  | -0.4049002 | 1.09E-08   | -0.8062481 |
| PSMA4   | turquoise | 0.71841026 | 1.16E-30  | -0.5927082 | 6.24E-19   | -0.6330957 |
| PSMA3   | turquoise | 0.47751186 | 6.30E-12  | -0.0924061 | 0.21092749 | -0.8320447 |
| PSMA1   | turquoise | 0.63014155 | 7.26E-22  | -0.288997  | 6.62E-05   | -0.8447621 |

|          |           |            |            |            |            |            |
|----------|-----------|------------|------------|------------|------------|------------|
| PSD2     | turquoise | -0.4878187 | 1.88E-12   | 0.69282578 | 8.72E-28   | 0.5414796  |
| PRUNE2   | turquoise | 0.46810779 | 1.83E-11   | -0.3679683 | 2.56E-07   | -0.836902  |
| PRSS53   | turquoise | -0.3292052 | 4.75E-06   | -0.0147161 | 0.84240812 | 0.68394183 |
| PRSS42   | turquoise | -0.3636951 | 3.61E-07   | 0.15641963 | 0.03348474 | 0.74752604 |
| PRSS3    | turquoise | 0.33758622 | 2.61E-06   | -0.6558378 | 4.02E-24   | -0.524929  |
| PRRT2    | turquoise | -0.3797833 | 9.73E-08   | 0.07788115 | 0.29201125 | 0.74703431 |
| PRRG3    | turquoise | 0.5294265  | 9.34E-15   | -0.6703252 | 1.71E-25   | -0.1718299 |
| PRRG2    | turquoise | -0.3798684 | 9.66E-08   | 0.34766445 | 1.24E-06   | 0.8393062  |
| PRRC2C   | turquoise | 0.21052677 | 0.00402273 | 0.04372245 | 0.55455955 | -0.6534598 |
| PRPS2    | turquoise | 0.69779105 | 2.55E-28   | -0.6081335 | 4.29E-20   | -0.5280662 |
| PRPS1    | turquoise | 0.65250297 | 8.12E-24   | -0.573963  | 1.34E-17   | -0.8545206 |
| PRPH2    | turquoise | 0.53794401 | 2.87E-15   | -0.6481699 | 2.00E-23   | -0.496674  |
| PRPF4    | turquoise | 0.52728509 | 1.25E-14   | -0.4919029 | 1.15E-12   | -0.3688738 |
| PRPF38A  | turquoise | -0.368472  | 2.46E-07   | 0.53835175 | 2.71E-15   | 0.7189378  |
| PRPF31   | turquoise | -0.4400512 | 3.67E-10   | 0.03664196 | 0.62047808 | 0.45466497 |
| PRPF18   | turquoise | 0.71967956 | 8.22E-31   | -0.1551482 | 0.03496817 | -0.436569  |
| PROSER1  | turquoise | 0.35151172 | 9.29E-07   | 0.06088373 | 0.41036043 | -0.7857877 |
| PROSC    | turquoise | 0.4508464  | 1.20E-10   | -0.0584939 | 0.42900952 | -0.6921731 |
| PRNP     | turquoise | 0.6203109  | 4.67E-21   | -0.542405  | 1.53E-15   | -0.7136646 |
| PRMT8    | turquoise | 0.57117738 | 2.07E-17   | -0.8077053 | 7.44E-44   | -0.1932338 |
| PRMT6    | turquoise | 0.66712341 | 3.48E-25   | -0.3706149 | 2.07E-07   | -0.7145285 |
| PRMT2    | turquoise | -0.5587347 | 1.40E-16   | 0.41211802 | 5.59E-09   | 0.85491185 |
| PRKX     | turquoise | -0.521027  | 2.89E-14   | 0.53730275 | 3.14E-15   | 0.78168525 |
| PRKRA    | turquoise | 0.75523109 | 2.08E-35   | -0.403502  | 1.23E-08   | -0.4207346 |
| PRKDC    | turquoise | 0.699724   | 1.57E-28   | -0.2562311 | 0.00043081 | -0.6547303 |
| PRKCI    | turquoise | 0.74676077 | 3.04E-34   | -0.5520395 | 3.79E-16   | -0.2639303 |
| PRKCH    | turquoise | -0.4977496 | 5.66E-13   | 0.8132007  | 6.88E-45   | 0.41806806 |
| PRKCE    | turquoise | 0.71455245 | 3.31E-30   | -0.6793766 | 2.16E-26   | -0.6251938 |
| PRKCB    | turquoise | 0.65953044 | 1.83E-24   | -0.6230805 | 2.78E-21   | -0.789607  |
| PRKAR1A  | turquoise | 0.46872575 | 1.71E-11   | -0.1399558 | 0.05742466 | -0.8731957 |
| PRKACB   | turquoise | 0.59129943 | 7.91E-19   | -0.3975317 | 2.11E-08   | -0.7695634 |
| PRICKLE2 | turquoise | 0.46101555 | 4.01E-11   | -0.5021203 | 3.30E-13   | -0.4821304 |
| PREX1    | turquoise | -0.6827775 | 9.76E-27   | 0.5241193  | 1.91E-14   | 0.43375165 |
| PREPL    | turquoise | 0.70202726 | 8.75E-29   | -0.6871665 | 3.44E-27   | -0.6602873 |
| PREP     | turquoise | 0.66028871 | 1.55E-24   | -0.6386707 | 1.37E-22   | -0.6910442 |
| PRDX6    | turquoise | -0.4509181 | 1.19E-10   | 0.77062786 | 1.19E-37   | 0.51772974 |
| PRDX3    | turquoise | 0.29576328 | 4.36E-05   | 0.14460503 | 0.04954813 | -0.7724983 |
| PRDM8    | turquoise | 0.30389532 | 2.61E-05   | -0.4640336 | 2.88E-11   | -0.515257  |
| PRDM2    | turquoise | 0.4906807  | 1.34E-12   | -0.8059323 | 1.58E-43   | -0.1471632 |
| PRDM16   | turquoise | -0.4381992 | 4.43E-10   | 0.76246634 | 1.93E-36   | 0.47368192 |
| PRDM10   | turquoise | 0.60118347 | 1.46E-19   | -0.2319105 | 0.00149134 | -0.6788673 |
| PRC1     | turquoise | 0.59872809 | 2.23E-19   | -0.7415854 | 1.48E-33   | -0.5934911 |
| PRAM1    | turquoise | -0.4921088 | 1.13E-12   | 0.18429302 | 0.01203167 | 0.44562437 |
| PPT1     | turquoise | 0.53564411 | 3.96E-15   | 0.00178236 | 0.98079005 | -0.6249875 |
| PPP6R3   | turquoise | -0.3484422 | 1.17E-06   | 0.10489104 | 0.15533848 | 0.79643603 |
| PPP6R2   | turquoise | -0.5096131 | 1.28E-13   | 0.41095703 | 6.23E-09   | 0.76032432 |

|          |           |            |           |            |            |            |
|----------|-----------|------------|-----------|------------|------------|------------|
| PPP6R1   | turquoise | -0.555142  | 2.40E-16  | 0.03874833 | 0.60051585 | 0.48974571 |
| PPP4R4   | turquoise | 0.68282167 | 9.66E-27  | -0.4771059 | 6.61E-12   | -0.6998582 |
| PPP4R1   | turquoise | -0.4139881 | 4.70E-09  | 0.64125353 | 8.16E-23   | 0.66183936 |
| PPP3R1   | turquoise | 0.55765691 | 1.65E-16  | -0.670731  | 1.56E-25   | -0.5409971 |
| PPP3CB   | turquoise | 0.67945454 | 2.12E-26  | -0.7666609 | 4.67E-37   | -0.6930292 |
| PPP3CA   | turquoise | 0.71867405 | 1.08E-30  | -0.5439919 | 1.22E-15   | -0.6652339 |
| PPP2R2C  | turquoise | 0.48665903 | 2.16E-12  | -0.5552639 | 2.35E-16   | -0.3088752 |
| PPP2R2B  | turquoise | 0.66657653 | 3.93E-25  | -0.5302678 | 8.32E-15   | -0.7366306 |
| PPP2CA   | turquoise | 0.60736515 | 4.92E-20  | -0.588829  | 1.20E-18   | -0.5839599 |
| PPP1R3F  | turquoise | 0.3021324  | 2.92E-05  | -0.6531714 | 7.06E-24   | -0.3925556 |
| PPP1R3C  | turquoise | -0.4200011 | 2.66E-09  | 0.64757631 | 2.26E-23   | 0.43955186 |
| PPP1R26  | turquoise | -0.2602558 | 0.0003466 | 0.16805302 | 0.02222139 | 0.76143364 |
| PPP1R2   | turquoise | 0.70311081 | 6.63E-29  | -0.5559177 | 2.14E-16   | -0.7210848 |
| PPP1R1A  | turquoise | -0.4931429 | 9.94E-13  | 0.19135459 | 0.0090749  | 0.66883112 |
| PPP1R16B | turquoise | -0.4211472 | 2.38E-09  | 0.35277571 | 8.44E-07   | 0.40971901 |
| PPP1R14C | turquoise | 0.6925777  | 9.27E-28  | -0.732365  | 2.29E-32   | -0.4680498 |
| PPP1R14B | turquoise | -0.7156931 | 2.43E-30  | 0.54115777 | 1.83E-15   | 0.62960737 |
| PPP1R12A | turquoise | 0.61390092 | 1.52E-20  | -0.1533155 | 0.03720421 | -0.6361369 |
| PPM1M    | turquoise | -0.3361157 | 2.90E-06  | 0.05351221 | 0.46941566 | 0.7424247  |
| PPM1L    | turquoise | 0.62761842 | 1.18E-21  | -0.656215  | 3.71E-24   | -0.434415  |
| PPM1H    | turquoise | 0.65195179 | 9.11E-24  | -0.8142656 | 4.29E-45   | -0.4658632 |
| PPM1A    | turquoise | 0.51712683 | 4.84E-14  | -0.2123061 | 0.00371677 | -0.7144663 |
| PPL      | turquoise | 0.66371853 | 7.37E-25  | -0.657702  | 2.70E-24   | -0.6830779 |
| PPIL1    | turquoise | 0.42747552 | 1.29E-09  | -0.0756208 | 0.30628506 | -0.7910544 |
| PPIA     | turquoise | 0.68623467 | 4.30E-27  | -0.3703527 | 2.12E-07   | -0.6571944 |
| PPFIBP2  | turquoise | -0.5852666 | 2.16E-18  | 0.5689123  | 2.95E-17   | 0.73967243 |
| PPEF1    | turquoise | 0.68803086 | 2.80E-27  | -0.7381335 | 4.19E-33   | -0.4201565 |
| PPCS     | turquoise | 0.42093261 | 2.43E-09  | -0.1390899 | 0.05899996 | -0.2676556 |
| PPARA    | turquoise | -0.4188531 | 2.97E-09  | 0.80148166 | 1.01E-42   | 0.53636913 |
| PPA1     | turquoise | 0.36376361 | 3.59E-07  | -0.0420299 | 0.57000441 | -0.837406  |
| POU3F2   | turquoise | -0.3757333 | 1.36E-07  | 0.74410738 | 6.88E-34   | 0.52448087 |
| POU2F1   | turquoise | -0.5191593 | 3.70E-14  | 0.20779258 | 0.00453724 | 0.89808804 |
| POPDC3   | turquoise | 0.53986291 | 2.19E-15  | -0.6349842 | 2.83E-22   | -0.1821206 |
| POP7     | turquoise | 0.46744049 | 1.97E-11  | -0.7102235 | 1.05E-29   | -0.7048826 |
| POMT2    | turquoise | -0.6651974 | 5.33E-25  | 0.40744142 | 8.61E-09   | 0.57500258 |
| POMP     | turquoise | 0.35859567 | 5.38E-07  | 0.20827551 | 0.00444228 | -0.3989167 |
| POMGNT2  | turquoise | 0.33599458 | 2.93E-06  | -0.2232097 | 0.00225791 | -0.826984  |
| POLR3H   | turquoise | -0.50376   | 2.68E-13  | 0.6068756  | 5.37E-20   | 0.78969055 |
| POLR3C   | turquoise | 0.4747271  | 8.68E-12  | -0.6187259 | 6.27E-21   | -0.2362085 |
| POLR3B   | turquoise | 0.64558984 | 3.39E-23  | -0.5377372 | 2.96E-15   | -0.3463319 |
| POLR2L   | turquoise | -0.4626022 | 3.37E-11  | 0.47384249 | 9.60E-12   | 0.5700209  |
| POLR2J4  | turquoise | -0.3426776 | 1.80E-06  | 0.30825306 | 1.97E-05   | 0.53064662 |
| POLR2B   | turquoise | 0.48716253 | 2.04E-12  | -0.1559334 | 0.03404563 | -0.8940661 |
| POLN     | turquoise | -0.4685638 | 1.74E-11  | 0.16385021 | 0.02584173 | 0.65200677 |
| POLDIP3  | turquoise | -0.6809304 | 1.51E-26  | 0.60354686 | 9.66E-20   | 0.4206925  |
| POLD2    | turquoise | -0.5333187 | 5.47E-15  | 0.1402594  | 0.05688054 | 0.59407477 |

|         |           |            |            |            |            |            |
|---------|-----------|------------|------------|------------|------------|------------|
| POLA1   | turquoise | -0.3633965 | 3.69E-07   | 0.60230939 | 1.20E-19   | 0.6977202  |
| POGK    | turquoise | -0.5314436 | 7.09E-15   | 0.60372329 | 9.36E-20   | 0.47278974 |
| PODN    | turquoise | -0.5204807 | 3.11E-14   | 0.46851398 | 1.75E-11   | 0.76398482 |
| PNPLA8  | turquoise | 0.23170779 | 0.00150609 | 0.32974316 | 4.57E-06   | -0.3605067 |
| PNPLA7  | turquoise | -0.471898  | 1.20E-11   | 0.03325147 | 0.65319522 | 0.63478056 |
| PNP     | turquoise | -0.3053397 | 2.38E-05   | 0.59401584 | 5.00E-19   | 0.28231642 |
| PNN     | turquoise | -0.3965224 | 2.30E-08   | 0.59185515 | 7.20E-19   | 0.18994313 |
| PNMAL1  | turquoise | 0.7286201  | 6.72E-32   | -0.7606373 | 3.55E-36   | -0.539045  |
| PNMA3   | turquoise | 0.35545246 | 6.87E-07   | -0.7270028 | 1.06E-31   | -0.1263706 |
| PNMA2   | turquoise | 0.69039935 | 1.58E-27   | -0.6519442 | 9.13E-24   | -0.7776489 |
| PNMA1   | turquoise | 0.6191291  | 5.82E-21   | -0.3458315 | 1.42E-06   | -0.8866499 |
| PNKP    | turquoise | -0.2758281 | 0.00014456 | -0.2896017 | 6.38E-05   | 0.5601521  |
| PMVK    | turquoise | -0.5282842 | 1.09E-14   | 0.40172011 | 1.45E-08   | 0.53377848 |
| PMS1    | turquoise | 0.7048889  | 4.20E-29   | -0.2646885 | 0.00027168 | -0.316508  |
| PMPCB   | turquoise | 0.74442761 | 6.24E-34   | -0.4809873 | 4.21E-12   | -0.5880212 |
| PMPCA   | turquoise | -0.4840801 | 2.93E-12   | 0.05795787 | 0.43325829 | 0.81168198 |
| PMP22   | turquoise | -0.4045357 | 1.12E-08   | 0.59387206 | 5.12E-19   | 0.40337073 |
| PMP2    | turquoise | -0.2986949 | 3.63E-05   | 0.49944365 | 4.60E-13   | 0.26580477 |
| PML     | turquoise | -0.3637828 | 3.58E-07   | 0.10142231 | 0.16953875 | 0.7959158  |
| PMEPA1  | turquoise | -0.3077384 | 2.03E-05   | 0.12670079 | 0.0856928  | 0.61157378 |
| PLXNB2  | turquoise | -0.7007663 | 1.21E-28   | 0.52220451 | 2.47E-14   | 0.39999941 |
| PLXNB1  | turquoise | -0.7172792 | 1.58E-30   | 0.59448661 | 4.61E-19   | 0.75378309 |
| PLXNA3  | turquoise | -0.5964778 | 3.29E-19   | 0.21648257 | 0.00307936 | 0.61620035 |
| PLXNA1  | turquoise | -0.2944972 | 4.72E-05   | -0.1675294 | 0.02264719 | 0.36577436 |
| PLS3    | turquoise | 0.3697675  | 2.22E-07   | 0.16479601 | 0.02498566 | -0.6825469 |
| PLPPR5  | turquoise | 0.60667279 | 5.57E-20   | -0.7059059 | 3.23E-29   | -0.1730503 |
| PLPPR4  | turquoise | 0.70849466 | 1.65E-29   | -0.6728967 | 9.56E-26   | -0.6482783 |
| PLPP6   | turquoise | 0.6661988  | 4.27E-25   | -0.4731937 | 1.03E-11   | -0.6392465 |
| PLOD2   | turquoise | -0.3596863 | 4.95E-07   | 0.77447    | 3.07E-38   | 0.29608206 |
| PLK2    | turquoise | 0.67381363 | 7.76E-26   | -0.8001764 | 1.72E-42   | -0.5423498 |
| PLIN3   | turquoise | -0.5609854 | 9.98E-17   | 0.66716063 | 3.45E-25   | 0.53361541 |
| PLIN2   | turquoise | -0.4417105 | 3.10E-10   | 0.73446681 | 1.24E-32   | 0.17910706 |
| PLEKHO2 | turquoise | -0.6019811 | 1.27E-19   | 0.64467232 | 4.09E-23   | 0.71331654 |
| PLEKHM2 | turquoise | -0.7117027 | 7.07E-30   | 0.59332837 | 5.62E-19   | 0.59604429 |
| PLEKHB1 | turquoise | -0.7322171 | 2.39E-32   | 0.46502483 | 2.58E-11   | 0.21900359 |
| PLEKHA5 | turquoise | 0.7602502  | 4.03E-36   | -0.450353  | 1.26E-10   | -0.3187777 |
| PLEKHA4 | turquoise | -0.47811   | 5.88E-12   | 0.4127799  | 5.26E-09   | 0.67454287 |
| PLCXD3  | turquoise | 0.69889711 | 1.93E-28   | -0.7590883 | 5.91E-36   | -0.5143806 |
| PLCL2   | turquoise | 0.62933707 | 8.48E-22   | -0.8045584 | 2.81E-43   | -0.5002929 |
| PLCH1   | turquoise | 0.68114237 | 1.43E-26   | -0.4813254 | 4.05E-12   | -0.4162067 |
| PLCG2   | turquoise | -0.262583  | 0.00030516 | 0.71367566 | 4.18E-30   | 0.27053813 |
| PLCG1   | turquoise | -0.5190283 | 3.77E-14   | 0.68530702 | 5.36E-27   | 0.66618433 |
| PLCE1   | turquoise | -0.4392926 | 3.96E-10   | 0.74786428 | 2.16E-34   | 0.55143553 |
| PLCD3   | turquoise | -0.5022818 | 3.23E-13   | 0.41880374 | 2.98E-09   | 0.60784382 |
| PLCB1   | turquoise | 0.54191862 | 1.64E-15   | -0.6367926 | 1.98E-22   | -0.3984955 |
| PLAC9   | turquoise | -0.4039815 | 1.18E-08   | 0.45668806 | 6.41E-11   | 0.40716566 |



|         |           |            |            |            |            |            |
|---------|-----------|------------|------------|------------|------------|------------|
| PLA1A   | turquoise | -0.5174287 | 4.65E-14   | 0.59898243 | 2.14E-19   | 0.32917412 |
| PKP4    | turquoise | -0.5355953 | 3.99E-15   | 0.32202348 | 7.82E-06   | 0.46151824 |
| PKN2    | turquoise | -0.389622  | 4.21E-08   | 0.48603799 | 2.33E-12   | 0.57834177 |
| PKIA    | turquoise | 0.49277396 | 1.04E-12   | -0.2802471 | 0.00011171 | -0.4385582 |
| PJA2    | turquoise | 0.53582191 | 3.87E-15   | -0.5130825 | 8.19E-14   | -0.5996945 |
| PJA1    | turquoise | 0.55338717 | 3.11E-16   | -0.4422012 | 2.94E-10   | -0.9311192 |
| PITHD1  | turquoise | 0.62817884 | 1.06E-21   | -0.7050669 | 4.01E-29   | -0.7970323 |
| PIP4K2C | turquoise | 0.61933156 | 5.61E-21   | -0.6463866 | 2.88E-23   | -0.6313889 |
| PIP4K2A | turquoise | -0.5143131 | 6.98E-14   | 0.24942793 | 0.00061736 | 0.66617311 |
| PIK3CD  | turquoise | -0.3265855 | 5.71E-06   | 0.17183422 | 0.01934681 | 0.72753439 |
| PIK3CB  | turquoise | 0.60267166 | 1.13E-19   | -0.3666973 | 2.84E-07   | -0.8680698 |
| PIGZ    | turquoise | 0.40412266 | 1.17E-08   | -0.6396497 | 1.12E-22   | -0.6693789 |
| PIGY    | turquoise | 0.19618183 | 0.00744325 | 0.27473997 | 0.00015394 | -0.6918567 |
| PIGP    | turquoise | 0.38128234 | 8.58E-08   | 0.02856131 | 0.69955479 | -0.6760793 |
| PIGK    | turquoise | 0.40972752 | 6.98E-09   | 0.02725769 | 0.71264935 | -0.6998956 |
| PIGH    | turquoise | 0.62310578 | 2.77E-21   | -0.068602  | 0.35348133 | -0.3106874 |
| PIGB    | turquoise | 0.47033158 | 1.43E-11   | -0.1531477 | 0.03741478 | -0.7156122 |
| PIEZO1  | turquoise | -0.6690693 | 2.26E-25   | 0.57161313 | 1.94E-17   | 0.84319213 |
| PIDD1   | turquoise | -0.5647551 | 5.62E-17   | 0.15000599 | 0.041548   | 0.42581347 |
| PID1    | turquoise | 0.40297629 | 1.29E-08   | -0.0741637 | 0.31572573 | -0.8201903 |
| PI16    | turquoise | -0.4939793 | 8.98E-13   | 0.42330536 | 1.93E-09   | 0.66324295 |
| PHYHD1  | turquoise | -0.4535964 | 8.93E-11   | 0.45169588 | 1.09E-10   | 0.28969593 |
| PHYH    | turquoise | 0.48689318 | 2.10E-12   | -0.0394344 | 0.59407651 | -0.3355453 |
| PHTF1   | turquoise | 0.61704832 | 8.55E-21   | -0.4177509 | 3.29E-09   | -0.56525   |
| PHRF1   | turquoise | -0.4421735 | 2.95E-10   | 0.31196446 | 1.54E-05   | 0.69891839 |
| PHLPP2  | turquoise | 0.60432989 | 8.42E-20   | -0.2961332 | 4.26E-05   | -0.8181057 |
| PHLPP1  | turquoise | -0.4691064 | 1.64E-11   | 0.5249788  | 1.71E-14   | 0.32221026 |
| PHKG1   | turquoise | -0.3834565 | 7.14E-08   | 0.44718702 | 1.76E-10   | 0.29749524 |
| PHKB    | turquoise | 0.34553091 | 1.46E-06   | 0.16953326 | 0.02105494 | -0.6815548 |
| PHKA2   | turquoise | -0.476051  | 7.46E-12   | 0.269418   | 0.00020853 | 0.88931923 |
| PHGDH   | turquoise | -0.5831991 | 3.03E-18   | 0.77894799 | 6.14E-39   | 0.6181205  |
| PHF24   | turquoise | 0.47092841 | 1.33E-11   | -0.7855662 | 5.30E-40   | -0.6004147 |
| PHF21B  | turquoise | -0.5631113 | 7.22E-17   | 0.66084896 | 1.37E-24   | 0.63234837 |
| PHF2    | turquoise | -0.5899293 | 9.95E-19   | 0.61870637 | 6.30E-21   | 0.6810214  |
| PHF19   | turquoise | -0.6541236 | 5.78E-24   | 0.55317288 | 3.21E-16   | 0.77307886 |
| PHF14   | turquoise | 0.68839594 | 2.56E-27   | -0.6265132 | 1.46E-21   | -0.8110876 |
| PHF11   | turquoise | -0.3478723 | 1.22E-06   | 0.60752066 | 4.79E-20   | 0.46353267 |
| PHB     | turquoise | -0.5329229 | 5.78E-15   | 0.77665676 | 1.41E-38   | 0.66824034 |
| PHACTR4 | turquoise | -0.3828614 | 7.51E-08   | 0.70610873 | 3.07E-29   | 0.59649861 |
| PHACTR3 | turquoise | -0.5855386 | 2.06E-18   | 0.6237812  | 2.44E-21   | 0.34624361 |
| PGRMC1  | turquoise | 0.65728086 | 2.96E-24   | -0.5583346 | 1.49E-16   | -0.8115909 |
| PGM5    | turquoise | -0.378692  | 1.07E-07   | 0.67351498 | 8.31E-26   | 0.52138366 |
| PGGHG   | turquoise | -0.5449383 | 1.06E-15   | 0.45929077 | 4.84E-11   | 0.48999274 |
| PGBD1   | turquoise | 0.64763898 | 2.23E-23   | -0.465823  | 2.36E-11   | -0.5461874 |
| PGAP1   | turquoise | 0.64227544 | 6.64E-23   | -0.4368603 | 5.07E-10   | -0.7398347 |
| PFN2    | turquoise | 0.61263679 | 1.91E-20   | -0.6123189 | 2.03E-20   | -0.9010355 |

|         |           |            |            |            |            |            |
|---------|-----------|------------|------------|------------|------------|------------|
| PFN1    | turquoise | -0.4058923 | 9.93E-09   | 0.27395836 | 0.00016102 | 0.67984093 |
| PFKM    | turquoise | 0.64270444 | 6.09E-23   | -0.2491217 | 0.0006273  | -0.6075444 |
| PFKFB4  | turquoise | -0.27733   | 0.0001325  | 0.27091445 | 0.00019159 | 0.8343012  |
| PFDN5   | turquoise | -0.4241207 | 1.79E-09   | 0.38146669 | 8.45E-08   | 0.64332806 |
| PFDN4   | turquoise | 0.7248743  | 1.94E-31   | -0.6007852 | 1.56E-19   | -0.4664759 |
| PEX7    | turquoise | 0.56056142 | 1.06E-16   | -0.2553801 | 0.00045088 | -0.6270537 |
| PEX6    | turquoise | -0.3404105 | 2.13E-06   | 0.16088575 | 0.02868981 | 0.28593587 |
| PEX19   | turquoise | 0.53515379 | 4.24E-15   | -0.4891231 | 1.61E-12   | -0.3854776 |
| PEG10   | turquoise | 0.53284276 | 5.84E-15   | -0.5295189 | 9.22E-15   | -0.7504381 |
| PDS5B   | turquoise | 0.69507772 | 5.01E-28   | -0.6580909 | 2.49E-24   | -0.4658244 |
| PDPN    | turquoise | -0.2787008 | 0.00012231 | 0.37524639 | 1.42E-07   | 0.57679099 |
| PDPK1   | turquoise | 0.57800242 | 7.02E-18   | -0.4068045 | 9.13E-09   | -0.7035542 |
| PDP1    | turquoise | 0.74402806 | 7.05E-34   | -0.6277641 | 1.15E-21   | -0.6971671 |
| PDK3    | turquoise | 0.6661384  | 4.33E-25   | -0.7934489 | 2.55E-41   | -0.5299378 |
| PDIK1L  | turquoise | 0.75115476 | 7.66E-35   | -0.294697  | 4.66E-05   | -0.6069146 |
| PDHX    | turquoise | 0.55444489 | 2.66E-16   | -0.2950404 | 4.56E-05   | -0.8722838 |
| PDHB    | turquoise | 0.51408187 | 7.19E-14   | -0.3328995 | 3.66E-06   | -0.7867502 |
| PDGFRB  | turquoise | -0.6697455 | 1.94E-25   | 0.79124371 | 6.04E-41   | 0.69508953 |
| PDGFD   | turquoise | 0.74482556 | 5.52E-34   | -0.5737438 | 1.38E-17   | -0.6197347 |
| PDE5A   | turquoise | -0.4631269 | 3.18E-11   | 0.68315983 | 8.92E-27   | 0.73335948 |
| PDE4DIP | turquoise | -0.2005051 | 0.00620918 | -0.1014715 | 0.16933069 | 0.58131553 |
| PDE4D   | turquoise | 0.61847813 | 6.57E-21   | -0.2206055 | 0.0025488  | -0.7606366 |
| PDE1A   | turquoise | 0.55561392 | 2.24E-16   | -0.687972  | 2.84E-27   | -0.2520049 |
| PDE12   | turquoise | 0.43388017 | 6.84E-10   | -0.0632717 | 0.39221215 | -0.6364475 |
| PDDC1   | turquoise | -0.5196703 | 3.46E-14   | 0.2120471  | 0.00375995 | 0.80809206 |
| PDCD6IP | turquoise | 0.57406382 | 1.32E-17   | -0.341555  | 1.95E-06   | -0.7623823 |
| PDCD6   | turquoise | 0.51908882 | 3.74E-14   | -0.2278523 | 0.00181309 | -0.8582858 |
| PDCD2L  | turquoise | 0.52725273 | 1.25E-14   | -0.5057398 | 2.09E-13   | -0.7770147 |
| PDCD10  | turquoise | 0.52452541 | 1.81E-14   | 0.01045459 | 0.88768207 | -0.6842661 |
| PCYOX1L | turquoise | 0.69025463 | 1.63E-27   | -0.7794886 | 5.04E-39   | -0.5060703 |
| PCSK7   | turquoise | -0.5784281 | 6.56E-18   | -0.0664181 | 0.36905025 | 0.50866874 |
| PCSK2   | turquoise | 0.84385336 | 2.32E-51   | -0.5681109 | 3.35E-17   | -0.5923004 |
| PCSK1   | turquoise | 0.70677357 | 2.58E-29   | -0.7119023 | 6.71E-30   | -0.6646216 |
| PCP4    | turquoise | 0.39940192 | 1.78E-08   | -0.6123009 | 2.03E-20   | -0.2102786 |
| PCNP    | turquoise | 0.45502478 | 7.67E-11   | 0.03472054 | 0.63893311 | -0.7413945 |
| PCMT1   | turquoise | 0.73011732 | 4.38E-32   | -0.6922135 | 1.01E-27   | -0.6561582 |
| PCLO    | turquoise | 0.64153943 | 7.70E-23   | -0.6137139 | 1.57E-20   | -0.7639001 |
| PCF11   | turquoise | -0.3584628 | 5.44E-07   | 0.64416231 | 4.53E-23   | 0.61541786 |
| PCED1A  | turquoise | -0.53027   | 8.32E-15   | 0.3467522  | 1.33E-06   | 0.55105164 |
| PCDHB4  | turquoise | 0.19573418 | 0.00758273 | 0.04943993 | 0.50393775 | -0.7021771 |
| PCDHB10 | turquoise | 0.69523376 | 4.82E-28   | -0.3456731 | 1.44E-06   | -0.592362  |
| PCDHA3  | turquoise | 0.58744476 | 1.50E-18   | -0.4790219 | 5.29E-12   | -0.8647834 |
| PCDH8   | turquoise | 0.72860912 | 6.74E-32   | -0.6799324 | 1.90E-26   | -0.7217408 |
| PCDH20  | turquoise | 0.663574   | 7.60E-25   | -0.5494462 | 5.54E-16   | -0.7149324 |
| PCDH19  | turquoise | 0.69837564 | 2.20E-28   | -0.7484928 | 1.77E-34   | -0.4904759 |
| PCDH18  | turquoise | -0.1823609 | 0.01297577 | 0.65751223 | 2.82E-24   | 0.35581835 |

|            |           |            |            |            |            |            |
|------------|-----------|------------|------------|------------|------------|------------|
| PCDH10     | turquoise | 0.33595219 | 2.94E-06   | -0.0712338 | 0.33527546 | -0.7977705 |
| PCBP1      | turquoise | 0.24066759 | 0.00096725 | 0.17691514 | 0.01599498 | -0.6895976 |
| PC         | turquoise | -0.712728  | 5.39E-30   | 0.45573653 | 7.10E-11   | 0.31349872 |
| PBXIP1     | turquoise | -0.6298654 | 7.66E-22   | 0.54413306 | 1.19E-15   | 0.41174949 |
| PAXIP1-AS2 | turquoise | -0.5176728 | 4.50E-14   | 0.60950317 | 3.36E-20   | 0.80478888 |
| PARVG      | turquoise | -0.5178835 | 4.38E-14   | 0.53995215 | 2.17E-15   | 0.28398881 |
| PARP9      | turquoise | -0.4587095 | 5.15E-11   | 0.80933185 | 3.71E-44   | 0.20933515 |
| PARP4      | turquoise | -0.3542573 | 7.53E-07   | 0.85089941 | 4.77E-53   | 0.1251958  |
| PARP14     | turquoise | -0.4521784 | 1.04E-10   | 0.56600271 | 4.63E-17   | 0.72157406 |
| PARP12     | turquoise | -0.4875101 | 1.96E-12   | 0.38313281 | 7.34E-08   | 0.6657925  |
| PARM1      | turquoise | 0.64425247 | 4.45E-23   | -0.7523339 | 5.27E-35   | -0.665324  |
| PARG       | turquoise | 0.72167755 | 4.74E-31   | -0.6845166 | 6.47E-27   | -0.6032879 |
| PAQR8      | turquoise | -0.5129033 | 8.38E-14   | 0.60557847 | 6.76E-20   | 0.73825785 |
| PAQR6      | turquoise | -0.6367904 | 1.98E-22   | 0.40107209 | 1.54E-08   | 0.5248709  |
| PAPSS1     | turquoise | 0.63399129 | 3.44E-22   | -0.2749911 | 0.00015173 | -0.2741359 |
| PAPOLA     | turquoise | -0.2421285 | 0.00089846 | 0.58862787 | 1.24E-18   | 0.63792267 |
| PAPLN      | turquoise | -0.3464036 | 1.36E-06   | 0.56438129 | 5.95E-17   | 0.59484146 |
| PAPD4      | turquoise | 0.54215186 | 1.59E-15   | 0.02094696 | 0.77716956 | -0.6649401 |
| PAOX       | turquoise | -0.5470043 | 7.90E-16   | 0.43363635 | 7.01E-10   | 0.6392357  |
| PAN2       | turquoise | -0.4709007 | 1.34E-11   | 0.50102998 | 3.78E-13   | 0.51444345 |
| PAM        | turquoise | 0.72935325 | 5.45E-32   | -0.6426503 | 6.16E-23   | -0.6348736 |
| PALM       | turquoise | -0.627559  | 1.19E-21   | 0.38284817 | 7.52E-08   | 0.72381828 |
| PALD1      | turquoise | -0.5384187 | 2.69E-15   | 0.62369202 | 2.48E-21   | 0.64437795 |
| PAK5       | turquoise | 0.68894156 | 2.24E-27   | -0.6111883 | 2.48E-20   | -0.7418316 |
| PAK4       | turquoise | -0.7349642 | 1.07E-32   | 0.38342523 | 7.16E-08   | 0.45875902 |
| PAK1       | turquoise | 0.66011416 | 1.61E-24   | -0.7766581 | 1.41E-38   | -0.7577993 |
| PAIP2      | turquoise | 0.47143517 | 1.26E-11   | -0.0891267 | 0.22764761 | -0.8904155 |
| PAIP1      | turquoise | 0.65700563 | 3.14E-24   | -0.5916468 | 7.46E-19   | -0.6425769 |
| PAFAH1B1   | turquoise | 0.64157452 | 7.65E-23   | -0.4809902 | 4.21E-12   | -0.8519815 |
| PAF1       | turquoise | -0.4259964 | 1.49E-09   | -0.0365514 | 0.62134258 | 0.6901324  |
| PAC SIN3   | turquoise | -0.5815172 | 3.98E-18   | 0.31230501 | 1.51E-05   | 0.67412002 |
| PAC SIN2   | turquoise | -0.518831  | 3.87E-14   | 0.51891666 | 3.82E-14   | 0.67762246 |
| PAC SIN1   | turquoise | 0.49236791 | 1.09E-12   | -0.6638064 | 7.23E-25   | -0.2611205 |
| PABPN1     | turquoise | -0.3827914 | 7.55E-08   | -0.0192696 | 0.7945999  | 0.47022807 |
| PABPC1L2B  | turquoise | 0.59259889 | 6.35E-19   | -0.7236376 | 2.75E-31   | -0.6727157 |
| PABPC1L2A  | turquoise | 0.51651992 | 5.24E-14   | -0.7733418 | 4.58E-38   | -0.5817626 |
| PABPC1     | turquoise | -0.3991969 | 1.82E-08   | 0.49408482 | 8.87E-13   | 0.0342208  |
| P3H1       | turquoise | -0.5428057 | 1.44E-15   | 0.1730788  | 0.01847396 | 0.81105586 |
| OXR1       | turquoise | 0.66824013 | 2.72E-25   | -0.461604  | 3.76E-11   | -0.7908079 |
| OXCT1      | turquoise | 0.65204668 | 8.93E-24   | -0.3876023 | 5.01E-08   | -0.7362245 |
| OTUD6B     | turquoise | 0.62276308 | 2.96E-21   | -0.048466  | 0.51238642 | -0.3776696 |
| OTOS       | turquoise | -0.4201366 | 2.62E-09   | 0.40483313 | 1.09E-08   | 0.32424226 |
| OTOGL      | turquoise | -0.4335373 | 7.08E-10   | 0.25875099 | 0.00037612 | 0.80541602 |
| OSTF1      | turquoise | 0.53632586 | 3.60E-15   | -0.3249902 | 6.38E-06   | -0.7292536 |
| OSTC       | turquoise | 0.27363456 | 0.00016404 | 0.34308294 | 1.75E-06   | -0.4368955 |
| OSBPL7     | turquoise | -0.5768111 | 8.50E-18   | 0.12122624 | 0.10022841 | 0.38705548 |

|          |           |            |            |            |            |            |
|----------|-----------|------------|------------|------------|------------|------------|
| OSBPL3   | turquoise | 0.65059036 | 1.21E-23   | -0.4763084 | 7.24E-12   | -0.5811583 |
| OSBPL10  | turquoise | 0.70069036 | 1.23E-28   | -0.6452867 | 3.61E-23   | -0.7472163 |
| OSBP2    | turquoise | -0.2567422 | 0.00041915 | -0.1831704 | 0.01257258 | 0.38432678 |
| ORMDL3   | turquoise | -0.5422675 | 1.56E-15   | 0.31161642 | 1.58E-05   | 0.68121559 |
| ORC5     | turquoise | 0.57713059 | 8.07E-18   | -0.744302  | 6.49E-34   | -0.5693159 |
| OR2L13   | turquoise | 0.55203044 | 3.80E-16   | -0.5185898 | 3.99E-14   | -0.533074  |
| OPTN     | turquoise | 0.66685784 | 3.69E-25   | -0.5182556 | 4.17E-14   | -0.638587  |
| OPRK1    | turquoise | 0.61071208 | 2.71E-20   | -0.5269353 | 1.31E-14   | -0.4940292 |
| OPN3     | turquoise | 0.6351549  | 2.74E-22   | -0.5918721 | 7.18E-19   | -0.8169337 |
| OPLAH    | turquoise | -0.3480392 | 1.21E-06   | 0.15594274 | 0.03403478 | 0.58196976 |
| OPCML    | turquoise | 0.6504888  | 1.24E-23   | -0.7090512 | 1.42E-29   | -0.6145166 |
| OPA1     | turquoise | 0.66831212 | 2.68E-25   | -0.6007221 | 1.58E-19   | -0.8432476 |
| OMG      | turquoise | 0.40504668 | 1.07E-08   | -0.1132772 | 0.12472515 | -0.8181731 |
| OLMALINC | turquoise | -0.5498063 | 5.26E-16   | 0.48214788 | 3.68E-12   | 0.32188032 |
| OLIG2    | turquoise | -0.5899812 | 9.86E-19   | 0.4725757  | 1.11E-11   | 0.53788913 |
| OLIG1    | turquoise | -0.6217755 | 3.56E-21   | 0.65326764 | 6.92E-24   | 0.46875668 |
| OLFM4    | turquoise | 0.31976812 | 9.13E-06   | -0.2655886 | 0.00025844 | -0.1415618 |
| OLFM3    | turquoise | 0.66886198 | 2.37E-25   | -0.6155668 | 1.12E-20   | -0.7568701 |
| OLFM1    | turquoise | 0.4938003  | 9.18E-13   | -0.6306725 | 6.55E-22   | -0.6227475 |
| OLA1     | turquoise | 0.71241557 | 5.85E-30   | -0.6394255 | 1.18E-22   | -0.6493219 |
| OGFOD1   | turquoise | 0.48278395 | 3.42E-12   | -0.722556  | 3.71E-31   | -0.3224264 |
| OCRL     | turquoise | 0.60528404 | 7.12E-20   | -0.7186451 | 1.09E-30   | -0.5735642 |
| OCIAD2   | turquoise | 0.50104207 | 3.77E-13   | -0.3760446 | 1.33E-07   | -0.4939352 |
| OCA2     | turquoise | 0.60058377 | 1.62E-19   | -0.5248706 | 1.73E-14   | -0.7006397 |
| OAZ1     | turquoise | 0.50914335 | 1.36E-13   | -0.5209391 | 2.93E-14   | -0.616845  |
| OAT      | turquoise | 0.50975387 | 1.26E-13   | -0.2173284 | 0.002963   | -0.8756181 |
| OAS2     | turquoise | -0.3081207 | 1.98E-05   | 0.35776832 | 5.74E-07   | 0.53307778 |
| NXPH1    | turquoise | 0.65273032 | 7.74E-24   | -0.3214011 | 8.16E-06   | -0.6871681 |
| NXNL1    | turquoise | -0.2950691 | 4.56E-05   | 0.29878397 | 3.61E-05   | 0.69488622 |
| NXN      | turquoise | -0.5833603 | 2.95E-18   | 0.58402333 | 2.64E-18   | 0.74447604 |
| NWD2     | turquoise | 0.74879894 | 1.61E-34   | -0.6050046 | 7.48E-20   | -0.6140702 |
| NUPR1    | turquoise | -0.6643266 | 6.45E-25   | 0.72836277 | 7.23E-32   | 0.50549324 |
| NUPL2    | turquoise | 0.48965359 | 1.51E-12   | -0.0697129 | 0.34572233 | -0.5416474 |
| NUP54    | turquoise | 0.56622573 | 4.48E-17   | -0.0610994 | 0.40870098 | -0.445828  |
| NUP50    | turquoise | 0.3296535  | 4.60E-06   | -0.2567332 | 0.00041935 | -0.4656957 |
| NUP188   | turquoise | -0.5452149 | 1.02E-15   | 0.52486605 | 1.73E-14   | 0.72756921 |
| NUP153   | turquoise | 0.41109502 | 6.15E-09   | -0.02303   | 0.75567947 | -0.8478048 |
| NUP133   | turquoise | 0.46074861 | 4.13E-11   | -0.0508184 | 0.49210548 | -0.5450861 |
| NUMA1    | turquoise | -0.6148424 | 1.28E-20   | 0.15003028 | 0.04151462 | 0.54104939 |
| NUDT9    | turquoise | 0.31559091 | 1.21E-05   | 0.10482491 | 0.15560056 | -0.6481515 |
| NUDT7    | turquoise | 0.41304111 | 5.13E-09   | -0.0437607 | 0.55421271 | -0.3316591 |
| NUDT3    | turquoise | -0.6055742 | 6.76E-20   | 0.25855499 | 0.00038013 | 0.60861962 |
| NUDT21   | turquoise | 0.70975955 | 1.18E-29   | -0.3878467 | 4.91E-08   | -0.8305424 |
| NUDT2    | turquoise | 0.2920806  | 5.48E-05   | -0.3781541 | 1.11E-07   | -0.4510307 |
| NUDT16   | turquoise | -0.6147144 | 1.31E-20   | 0.35847598 | 5.44E-07   | 0.59622801 |
| NUDT15   | turquoise | -0.3813592 | 8.52E-08   | 0.69282214 | 8.73E-28   | 0.64834343 |

|          |           |            |            |            |            |            |
|----------|-----------|------------|------------|------------|------------|------------|
| NUDT11   | turquoise | 0.67029704 | 1.72E-25   | -0.7115269 | 7.41E-30   | -0.6931384 |
| NUDT10   | turquoise | 0.73736645 | 5.26E-33   | -0.5633541 | 6.96E-17   | -0.3842116 |
| NUDT1    | turquoise | -0.388444  | 4.66E-08   | 0.39778978 | 2.06E-08   | 0.65899568 |
| NUAK1    | turquoise | 0.63020575 | 7.17E-22   | -0.7417338 | 1.42E-33   | -0.4734613 |
| NTPCR    | turquoise | 0.32540931 | 6.19E-06   | -0.3717218 | 1.89E-07   | -0.7327119 |
| NTNG1    | turquoise | 0.68512423 | 5.60E-27   | -0.6017848 | 1.31E-19   | -0.6426721 |
| NTM      | turquoise | 0.37339379 | 1.65E-07   | -0.3932951 | 3.06E-08   | -0.0287516 |
| NT5C3A   | turquoise | 0.40694873 | 9.01E-09   | -0.2634368 | 0.00029115 | -0.5359751 |
| NT5C2    | turquoise | -0.3320987 | 3.87E-06   | 0.6513034  | 1.04E-23   | 0.59372475 |
| NSUN5    | turquoise | -0.6208063 | 4.26E-21   | 0.18318579 | 0.01256503 | 0.75589946 |
| NSRP1    | turquoise | -0.2940306 | 4.86E-05   | 0.5620518  | 8.49E-17   | 0.51763305 |
| NSMF     | turquoise | -0.39427   | 2.81E-08   | 0.26615933 | 0.00025035 | 0.80445822 |
| NSL1     | turquoise | -0.4272196 | 1.32E-09   | 0.45976622 | 4.60E-11   | 0.51124446 |
| NSG1     | turquoise | 0.67277689 | 9.82E-26   | -0.7223751 | 3.90E-31   | -0.6575212 |
| NSF      | turquoise | 0.66586776 | 4.60E-25   | -0.7631447 | 1.54E-36   | -0.7113639 |
| NSA2     | turquoise | 0.19708314 | 0.0071693  | 0.20804556 | 0.00448727 | -0.5932735 |
| NRXN3    | turquoise | 0.85318358 | 1.30E-53   | -0.68137   | 1.36E-26   | -0.4905913 |
| NRXN1    | turquoise | 0.69725467 | 2.92E-28   | -0.6130872 | 1.76E-20   | -0.7202241 |
| NRP1     | turquoise | 0.17202412 | 0.01921137 | 0.32372965 | 6.96E-06   | -0.4772227 |
| NRN1     | turquoise | 0.69026453 | 1.63E-27   | -0.7121407 | 6.30E-30   | -0.5984136 |
| NRIP1    | turquoise | 0.63046705 | 6.82E-22   | -0.341395  | 1.98E-06   | -0.5119657 |
| NREP     | turquoise | 0.54138053 | 1.77E-15   | -0.6364309 | 2.13E-22   | -0.6128281 |
| NRDE2    | turquoise | -0.4771086 | 6.60E-12   | 0.20479015 | 0.00516968 | 0.89167641 |
| NRCAM    | turquoise | 0.70173334 | 9.43E-29   | -0.3349196 | 3.17E-06   | -0.3987204 |
| NR3C2    | turquoise | 0.57159421 | 1.94E-17   | -0.192965  | 0.00849843 | -0.415474  |
| NR2F1    | turquoise | -0.6309016 | 6.27E-22   | 0.49028481 | 1.40E-12   | 0.72614179 |
| NR2E1    | turquoise | -0.4523685 | 1.02E-10   | 0.7273523  | 9.64E-32   | 0.43308632 |
| NR1D2    | turquoise | 0.51338612 | 7.87E-14   | -0.1298579 | 0.07811073 | -0.6123772 |
| NPY5R    | turquoise | -0.4018774 | 1.43E-08   | 0.19756129 | 0.00702765 | 0.7784381  |
| NPY      | turquoise | 0.42294405 | 2.00E-09   | -0.4845227 | 2.79E-12   | -0.6310218 |
| NPTX2    | turquoise | 0.53180322 | 6.74E-15   | -0.6352987 | 2.66E-22   | -0.6822302 |
| NPTX1    | turquoise | 0.44600319 | 1.99E-10   | -0.6917108 | 1.15E-27   | -0.2874658 |
| NPTN     | turquoise | 0.65303947 | 7.25E-24   | -0.7029874 | 6.85E-29   | -0.6442438 |
| NPIP3    | turquoise | -0.6493889 | 1.55E-23   | 0.24413863 | 0.00081116 | 0.61429193 |
| NPHP3    | turquoise | 0.18681693 | 0.01088967 | 0.1055972  | 0.15256063 | -0.5030203 |
| NPFF     | turquoise | -0.4394086 | 3.92E-10   | 0.31219421 | 1.52E-05   | 0.78358407 |
| NPEPL1   | turquoise | -0.5103197 | 1.17E-13   | 0.27610422 | 0.00014227 | 0.79788401 |
| NPAS3    | turquoise | -0.4479194 | 1.63E-10   | 0.6760361  | 4.67E-26   | 0.3020001  |
| NOVA1    | turquoise | 0.60813723 | 4.29E-20   | -0.2610488 | 0.00033193 | -0.7154338 |
| NOV      | turquoise | 0.65905544 | 2.02E-24   | -0.3773438 | 1.19E-07   | -0.6392829 |
| NOTCH4   | turquoise | -0.6685945 | 2.51E-25   | 0.49776522 | 5.65E-13   | 0.69541017 |
| NOTCH2NL | turquoise | -0.3060452 | 2.27E-05   | 0.52420978 | 1.89E-14   | 0.58027208 |
| NOSTRIN  | turquoise | -0.3890843 | 4.41E-08   | 0.56595977 | 4.67E-17   | 0.50008997 |
| NOS3     | turquoise | -0.5013798 | 3.61E-13   | 0.59200697 | 7.02E-19   | 0.70572713 |
| NOP56    | turquoise | -0.5307962 | 7.74E-15   | 0.12497804 | 0.09007244 | 0.72317464 |
| NOP2     | turquoise | -0.3903618 | 3.95E-08   | 0.13034345 | 0.07699433 | 0.75106294 |

|           |           |            |            |            |            |            |
|-----------|-----------|------------|------------|------------|------------|------------|
| NOMO2     | turquoise | 0.44674785 | 1.84E-10   | -0.7310713 | 3.32E-32   | -0.5174355 |
| NOL4      | turquoise | 0.67379787 | 7.79E-26   | -0.7058792 | 3.25E-29   | -0.5279615 |
| NOL12     | turquoise | -0.6469885 | 2.55E-23   | 0.41037326 | 6.58E-09   | 0.74169505 |
| NOA1      | turquoise | 0.43409477 | 6.70E-10   | -0.1388268 | 0.05948565 | -0.8203357 |
| NNT       | turquoise | 0.36344404 | 3.68E-07   | 0.0464907  | 0.52974462 | -0.7859629 |
| NNAT      | turquoise | 0.50252673 | 3.13E-13   | -0.689508  | 1.96E-27   | -0.5148054 |
| NMNAT2    | turquoise | 0.6574622  | 2.85E-24   | -0.8093561 | 3.67E-44   | -0.6350852 |
| NME5      | turquoise | 0.64821832 | 1.98E-23   | -0.6879549 | 2.85E-27   | -0.4016266 |
| NME4      | turquoise | -0.6803467 | 1.73E-26   | 0.40881591 | 7.59E-09   | 0.46212547 |
| NME3      | turquoise | -0.6657482 | 4.72E-25   | 0.37943906 | 1.00E-07   | 0.79090539 |
| NMD3      | turquoise | 0.45477869 | 7.87E-11   | 0.18233856 | 0.01298706 | -0.4971453 |
| NLK       | turquoise | 0.75278788 | 4.56E-35   | -0.7422808 | 1.20E-33   | -0.4008221 |
| NLGN4X    | turquoise | 0.43946052 | 3.90E-10   | -0.4524249 | 1.01E-10   | -0.0314483 |
| NLGN1     | turquoise | 0.55101572 | 4.41E-16   | -0.3966855 | 2.27E-08   | -0.2763799 |
| NKX2-2    | turquoise | -0.6122505 | 2.05E-20   | 0.64743719 | 2.32E-23   | 0.56443638 |
| NKRF      | turquoise | 0.62010953 | 4.85E-21   | -0.6204149 | 4.59E-21   | -0.4986748 |
| NKIRAS1   | turquoise | 0.723485   | 2.87E-31   | -0.6675496 | 3.17E-25   | -0.6109793 |
| NKD2      | turquoise | 0.32757847 | 5.32E-06   | -0.6210708 | 4.06E-21   | 0.0796143  |
| NKAIN2    | turquoise | 0.55200201 | 3.81E-16   | -0.5678637 | 3.48E-17   | -0.2872324 |
| NIPSNAP3B | turquoise | 0.5996527  | 1.90E-19   | -0.6830488 | 9.16E-27   | -0.2532136 |
| NIPSNAP1  | turquoise | 0.46733181 | 2.00E-11   | -0.7504206 | 9.66E-35   | -0.2850947 |
| NIPBL     | turquoise | -0.4084497 | 7.85E-09   | 0.64444585 | 4.28E-23   | 0.7990574  |
| NINJ1     | turquoise | -0.5742926 | 1.27E-17   | 0.70369465 | 5.71E-29   | 0.58905537 |
| NIFK      | turquoise | 0.48587522 | 2.37E-12   | -0.0633104 | 0.3919218  | -0.5516229 |
| NIF3L1    | turquoise | 0.68673279 | 3.82E-27   | -0.5039857 | 2.61E-13   | -0.7896713 |
| NHLRC3    | turquoise | 0.5665849  | 4.24E-17   | -0.226464  | 0.00193691 | -0.6829056 |
| NGDN      | turquoise | 0.42280222 | 2.03E-09   | -0.1640843 | 0.02562751 | -0.7327501 |
| NGB       | turquoise | -0.1903421 | 0.00945484 | -0.0649342 | 0.37986706 | 0.49767582 |
| NFYC-AS1  | turquoise | -0.3360825 | 2.91E-06   | 0.36281335 | 3.87E-07   | 0.72945551 |
| NFU1      | turquoise | 0.4613999  | 3.85E-11   | -0.2368661 | 0.00116951 | -0.8782871 |
| NFS1      | turquoise | 0.75756207 | 9.76E-36   | -0.5873735 | 1.52E-18   | -0.4756441 |
| NFKBIZ    | turquoise | -0.3798484 | 9.68E-08   | 0.60226027 | 1.21E-19   | 0.50176764 |
| NFKBIA    | turquoise | -0.6869418 | 3.63E-27   | 0.6358986  | 2.37E-22   | 0.67383044 |
| NFKB1     | turquoise | -0.5337604 | 5.15E-15   | 0.71895978 | 1.00E-30   | 0.69073306 |
| NFIC      | turquoise | -0.6094899 | 3.37E-20   | 0.42632131 | 1.44E-09   | 0.82085287 |
| NFIB      | turquoise | -0.5714104 | 2.00E-17   | 0.70415122 | 5.08E-29   | 0.4686647  |
| NFIA      | turquoise | -0.5431121 | 1.38E-15   | 0.855604   | 3.18E-54   | 0.27346667 |
| NFATC3    | turquoise | -0.5446696 | 1.11E-15   | 0.33672037 | 2.78E-06   | 0.81832955 |
| NEUROD6   | turquoise | 0.63381546 | 3.56E-22   | -0.6733033 | 8.72E-26   | -0.7045674 |
| NEURL1    | turquoise | -0.1868231 | 0.010887   | -0.1175751 | 0.11096094 | 0.72871347 |
| NEU4      | turquoise | -0.3413802 | 1.98E-06   | 0.20480376 | 0.00516664 | 0.77849975 |
| NETO2     | turquoise | 0.7386986  | 3.54E-33   | -0.6207313 | 4.32E-21   | -0.61824   |
| NET1      | turquoise | -0.2853783 | 8.24E-05   | 0.46387333 | 2.93E-11   | 0.49803865 |
| NES       | turquoise | -0.6621395 | 1.04E-24   | 0.50603444 | 2.02E-13   | 0.50791716 |
| NELL2     | turquoise | 0.62923361 | 8.65E-22   | -0.6021073 | 1.24E-19   | -0.8066377 |
| NELL1     | turquoise | 0.68023596 | 1.77E-26   | -0.658806  | 2.13E-24   | -0.8166428 |

|          |           |            |            |            |            |            |
|----------|-----------|------------|------------|------------|------------|------------|
| NELFB    | turquoise | -0.4181069 | 3.18E-09   | -0.1187042 | 0.10755001 | 0.54761126 |
| NEK7     | turquoise | -0.4798846 | 4.79E-12   | 0.74032448 | 2.17E-33   | 0.50771636 |
| NEK2     | turquoise | 0.78006083 | 4.09E-39   | -0.6062582 | 5.99E-20   | -0.3762225 |
| NEGR1    | turquoise | 0.80108461 | 1.19E-42   | -0.6329982 | 4.17E-22   | -0.6539701 |
| NEFM     | turquoise | 0.59582342 | 3.67E-19   | -0.6143969 | 1.39E-20   | -0.8234592 |
| NEFH     | turquoise | 0.53802573 | 2.84E-15   | -0.6336632 | 3.67E-22   | -0.4409129 |
| NEDD4L   | turquoise | 0.48990173 | 1.47E-12   | -0.7172717 | 1.59E-30   | -0.2329379 |
| NECTIN3  | turquoise | -0.1450631 | 0.04882322 | -0.0721757 | 0.32890794 | 0.64597334 |
| NECAP2   | turquoise | -0.6735631 | 8.22E-26   | 0.77933938 | 5.33E-39   | 0.57812745 |
| NECAP1   | turquoise | 0.68011898 | 1.82E-26   | -0.6952403 | 4.81E-28   | -0.7919178 |
| NECAB1   | turquoise | 0.5910673  | 8.22E-19   | -0.5943248 | 4.74E-19   | -0.7937183 |
| NDUFS7   | turquoise | -0.61524   | 1.19E-20   | 0.14247906 | 0.05303062 | 0.68735365 |
| NDUFS5   | turquoise | 0.54294221 | 1.42E-15   | -0.3546299 | 7.32E-07   | -0.6325851 |
| NDUFS4   | turquoise | 0.44041496 | 3.53E-10   | -0.0694389 | 0.34762631 | -0.7614036 |
| NDUFC2   | turquoise | 0.49748547 | 5.85E-13   | -0.4786152 | 5.55E-12   | 0.11430322 |
| NDUFC1   | turquoise | 0.37903472 | 1.04E-07   | -0.1130283 | 0.12556084 | -0.6548425 |
| NDUFB6   | turquoise | 0.51085238 | 1.09E-13   | -0.2762899 | 0.00014075 | -0.7766346 |
| NDUFB5   | turquoise | 0.53308191 | 5.65E-15   | -0.10139   | 0.16967555 | -0.7164284 |
| NDUFB3   | turquoise | 0.29120359 | 5.78E-05   | 0.1027888  | 0.16383354 | -0.7852588 |
| NDUF AF5 | turquoise | 0.66803641 | 2.84E-25   | -0.7163073 | 2.06E-30   | -0.6050436 |
| NDUF AF4 | turquoise | 0.71817284 | 1.24E-30   | -0.246629  | 0.00071383 | -0.4593651 |
| NDUF AF1 | turquoise | 0.46654662 | 2.18E-11   | -0.1694388 | 0.02112778 | -0.6139877 |
| NDUF AB1 | turquoise | 0.71296143 | 5.06E-30   | -0.6217846 | 3.55E-21   | -0.7769014 |
| NDUF A4  | turquoise | 0.54597518 | 9.17E-16   | -0.1986576 | 0.00671223 | -0.8150486 |
| NDUF A12 | turquoise | 0.33301333 | 3.63E-06   | 0.10755336 | 0.14506148 | -0.6862345 |
| NDUF A1  | turquoise | 0.33842574 | 2.46E-06   | -0.042593  | 0.56484334 | -0.6873442 |
| NDRG4    | turquoise | 0.58920451 | 1.12E-18   | -0.6864789 | 4.06E-27   | -0.8025387 |
| NDRG3    | turquoise | 0.55936267 | 1.28E-16   | -0.7712101 | 9.69E-38   | -0.6638274 |
| NDRG1    | turquoise | -0.6808452 | 1.54E-26   | 0.50761077 | 1.65E-13   | 0.53242213 |
| NDN      | turquoise | 0.67008153 | 1.80E-25   | -0.7282321 | 7.51E-32   | -0.5464468 |
| NDFIP2   | turquoise | 0.59797617 | 2.54E-19   | -0.3560004 | 6.59E-07   | -0.8624542 |
| NDFIP1   | turquoise | 0.72680031 | 1.13E-31   | -0.6886075 | 2.43E-27   | -0.7454466 |
| NDEL1    | turquoise | 0.62727827 | 1.26E-21   | -0.6034528 | 9.82E-20   | -0.5566143 |
| NCSTN    | turquoise | -0.5150457 | 6.35E-14   | 0.19766749 | 0.00699653 | 0.61310234 |
| NCOA7    | turquoise | 0.60232539 | 1.20E-19   | -0.5545282 | 2.63E-16   | -0.8364237 |
| NCKAP1L  | turquoise | -0.4157983 | 3.96E-09   | 0.4600018  | 4.48E-11   | 0.55488713 |
| NCKAP1   | turquoise | 0.477062   | 6.64E-12   | -0.1330265 | 0.07105526 | -0.8747061 |
| NCEH1    | turquoise | 0.71642532 | 2.00E-30   | -0.6616065 | 1.17E-24   | -0.3328213 |
| NCBP1    | turquoise | -0.4686729 | 1.72E-11   | 0.66422921 | 6.59E-25   | 0.65567114 |
| NCAPD2   | turquoise | -0.383771  | 6.95E-08   | 0.27083678 | 0.00019244 | 0.54751178 |
| NCAM2    | turquoise | 0.58947416 | 1.07E-18   | -0.3374552 | 2.64E-06   | -0.7543296 |
| NCALD    | turquoise | 0.62098072 | 4.13E-21   | -0.814978  | 3.13E-45   | -0.5426099 |
| NBPF22P  | turquoise | -0.2027934 | 0.0056329  | -0.0120015 | 0.87119714 | 0.755479   |
| NBPF14   | turquoise | -0.2135891 | 0.00350932 | 0.27080213 | 0.00019282 | 0.60559828 |
| NBPF10   | turquoise | -0.5934563 | 5.49E-19   | 0.38512544 | 6.20E-08   | 0.54825621 |
| NBN      | turquoise | 0.43409384 | 6.70E-10   | -0.0801186 | 0.27832554 | -0.8600955 |

|         |           |            |            |            |            |            |
|---------|-----------|------------|------------|------------|------------|------------|
| NBEAL2  | turquoise | -0.4635682 | 3.03E-11   | 0.28864461 | 6.76E-05   | 0.86334135 |
| NBEA    | turquoise | 0.68513694 | 5.58E-27   | -0.5377011 | 2.97E-15   | -0.8417422 |
| NAV3    | turquoise | 0.64112967 | 8.36E-23   | -0.375453  | 1.39E-07   | -0.8579525 |
| NAV2    | turquoise | -0.3062205 | 2.24E-05   | 0.39816273 | 1.99E-08   | 0.60350731 |
| NAT14   | turquoise | -0.4275529 | 1.28E-09   | -0.1757831 | 0.01669443 | 0.45592726 |
| NASP    | turquoise | -0.3182669 | 1.01E-05   | 0.32755994 | 5.33E-06   | 0.63671011 |
| NAPRT   | turquoise | -0.2428262 | 0.00086723 | 0.06520731 | 0.37786177 | 0.76591421 |
| NAPEPLD | turquoise | 0.68970003 | 1.87E-27   | -0.3753923 | 1.40E-07   | -0.58183   |
| NAPB    | turquoise | 0.64239113 | 6.49E-23   | -0.780445  | 3.56E-39   | -0.5968614 |
| NAP1L5  | turquoise | 0.5413194  | 1.78E-15   | -0.6626089 | 9.38E-25   | -0.8291992 |
| NAP1L3  | turquoise | 0.6528915  | 7.48E-24   | -0.6124771 | 1.97E-20   | -0.8105717 |
| NAP1L2  | turquoise | 0.68768308 | 3.04E-27   | -0.5710277 | 2.12E-17   | -0.8294087 |
| NAGK    | turquoise | -0.5075697 | 1.66E-13   | 0.15208762 | 0.03876882 | 0.64272363 |
| NAE1    | turquoise | 0.40879357 | 7.61E-09   | -0.1357433 | 0.06542674 | -0.5977854 |
| NADSYN1 | turquoise | -0.4285908 | 1.16E-09   | 0.18292432 | 0.01269397 | 0.56164452 |
| NACC2   | turquoise | -0.6163582 | 9.70E-21   | 0.82779015 | 8.25E-48   | 0.56940324 |
| NACAP1  | turquoise | 0.18482764 | 0.01178135 | 0.21916212 | 0.00272429 | -0.3188331 |
| NAA60   | turquoise | -0.5013405 | 3.63E-13   | 0.11619356 | 0.11524925 | 0.46049021 |
| NAA20   | turquoise | 0.66792127 | 2.92E-25   | -0.4815129 | 3.96E-12   | -0.522176  |
| NAA10   | turquoise | -0.2926411 | 5.29E-05   | -0.2219172 | 0.00239828 | 0.67155158 |
| N4BP2L1 | turquoise | 0.61030624 | 2.91E-20   | -0.2166998 | 0.00304909 | -0.7093282 |
| N4BP1   | turquoise | -0.2534513 | 0.00049962 | -0.2698463 | 0.00020354 | 0.52867016 |
| MZT1    | turquoise | 0.71462544 | 3.24E-30   | -0.543047  | 1.40E-15   | -0.7686565 |
| MZF1    | turquoise | -0.4492614 | 1.41E-10   | 0.26673073 | 0.0002425  | 0.72761925 |
| MYT1L   | turquoise | 0.61972373 | 5.21E-21   | -0.645445  | 3.49E-23   | -0.816591  |
| MYRIP   | turquoise | 0.35713893 | 6.03E-07   | -0.2095014 | 0.00420919 | -0.6007809 |
| MYOT    | turquoise | -0.5399592 | 2.16E-15   | 0.62603471 | 1.59E-21   | 0.56001659 |
| MYOM1   | turquoise | -0.551773  | 3.94E-16   | 0.51392216 | 7.34E-14   | 0.74668841 |
| MYOF    | turquoise | -0.3734941 | 1.64E-07   | 0.75080851 | 8.55E-35   | 0.14883866 |
| MYO9B   | turquoise | -0.6314375 | 5.65E-22   | 0.30137294 | 3.06E-05   | 0.69321284 |
| MYO18A  | turquoise | -0.2279369 | 0.00180578 | -0.1559041 | 0.03407968 | 0.56157112 |
| MYO10   | turquoise | -0.4089509 | 7.50E-09   | 0.68933213 | 2.04E-27   | 0.68112338 |
| MYL3    | turquoise | -0.5133861 | 7.87E-14   | 0.32325507 | 7.19E-06   | 0.58444791 |
| MYH9    | turquoise | -0.4690865 | 1.64E-11   | 0.66225873 | 1.01E-24   | -0.0585722 |
| MYH11   | turquoise | -0.2747813 | 0.00015357 | 0.53238243 | 6.23E-15   | 0.34698334 |
| MYH10   | turquoise | 0.59578566 | 3.70E-19   | -0.6177825 | 7.47E-21   | -0.5377859 |
| MYCBP2  | turquoise | 0.55952872 | 1.24E-16   | -0.68881   | 2.32E-27   | -0.5017456 |
| MYBPH   | turquoise | -0.2666893 | 0.00024306 | 0.31149487 | 1.59E-05   | 0.38205225 |
| MYBPC1  | turquoise | -0.4819808 | 3.75E-12   | 0.73696609 | 5.93E-33   | 0.69680609 |
| MYADM   | turquoise | 0.52828053 | 1.09E-14   | -0.597917  | 2.57E-19   | -0.6387161 |
| MVB12B  | turquoise | -0.6261353 | 1.56E-21   | 0.32844745 | 5.01E-06   | 0.60161007 |
| MVB12A  | turquoise | -0.4240571 | 1.80E-09   | 0.31629229 | 1.15E-05   | 0.79719635 |
| MUTYH   | turquoise | -0.3812417 | 8.61E-08   | 0.21157841 | 0.00383926 | 0.71762652 |
| MUM1L1  | turquoise | 0.65079339 | 1.16E-23   | -0.5526251 | 3.48E-16   | -0.7207339 |
| MTX3    | turquoise | 0.60917682 | 3.56E-20   | -0.2082661 | 0.00444411 | -0.7336429 |
| MTX2    | turquoise | 0.70057114 | 1.27E-28   | -0.5938268 | 5.16E-19   | -0.7921879 |



|         |           |            |            |            |            |            |
|---------|-----------|------------|------------|------------|------------|------------|
| MTX1    | turquoise | -0.3651858 | 3.20E-07   | -0.0075559 | 0.918696   | 0.78882342 |
| MTRF1L  | turquoise | -0.4270873 | 1.34E-09   | 0.66345232 | 7.81E-25   | 0.56898368 |
| MTPN    | turquoise | 0.65844393 | 2.31E-24   | -0.5202441 | 3.21E-14   | -0.5421657 |
| MTMR9   | turquoise | 0.66245379 | 9.71E-25   | -0.7206927 | 6.22E-31   | -0.3595954 |
| MTMR7   | turquoise | 0.70770324 | 2.03E-29   | -0.7585912 | 6.96E-36   | -0.5628357 |
| MTMR6   | turquoise | 0.70561374 | 3.49E-29   | -0.6437532 | 4.92E-23   | -0.2998266 |
| MTMR4   | turquoise | 0.64848933 | 1.87E-23   | -0.5506263 | 4.67E-16   | -0.5216102 |
| MTIF3   | turquoise | -0.3562489 | 6.46E-07   | 0.14094329 | 0.05567052 | 0.75371806 |
| MTHFD2  | turquoise | -0.2022863 | 0.00575632 | 0.34073767 | 2.08E-06   | 0.33739038 |
| MTHFD1L | turquoise | 0.55059097 | 4.69E-16   | -0.4160716 | 3.86E-09   | -0.6177386 |
| MTERF3  | turquoise | 0.40679813 | 9.14E-09   | -0.2734109 | 0.00016616 | -0.7424604 |
| MTCH1   | turquoise | 0.63720199 | 1.83E-22   | -0.5303036 | 8.28E-15   | -0.7737477 |
| MTA3    | turquoise | -0.4841385 | 2.91E-12   | 0.7175219  | 1.48E-30   | 0.54318547 |
| MT3     | turquoise | -0.6581436 | 2.46E-24   | 0.51418877 | 7.09E-14   | 0.72730688 |
| MT2A    | turquoise | -0.7198405 | 7.86E-31   | 0.71711427 | 1.66E-30   | 0.41983662 |
| MT1X    | turquoise | -0.5311887 | 7.34E-15   | 0.59212206 | 6.88E-19   | 0.3914337  |
| MT1M    | turquoise | -0.4523334 | 1.02E-10   | 0.72871409 | 6.54E-32   | 0.36978472 |
| MT1H    | turquoise | -0.4097223 | 6.98E-09   | 0.55349813 | 3.06E-16   | 0.51181521 |
| MT1G    | turquoise | -0.4130523 | 5.12E-09   | 0.53018025 | 8.42E-15   | 0.47989098 |
| MT1F    | turquoise | -0.4533016 | 9.22E-11   | 0.56017318 | 1.13E-16   | 0.53064849 |
| MT1E    | turquoise | -0.4952728 | 7.67E-13   | 0.66162166 | 1.16E-24   | 0.54995042 |
| MT1A    | turquoise | -0.5991769 | 2.07E-19   | 0.68880611 | 2.32E-27   | 0.47854433 |
| MSRB1   | turquoise | -0.5771084 | 8.10E-18   | 0.46877812 | 1.70E-11   | 0.71594023 |
| MSRA    | turquoise | 0.39782338 | 2.05E-08   | -0.4938108 | 9.17E-13   | -0.634332  |
| MSN     | turquoise | -0.626197  | 1.55E-21   | 0.71984873 | 7.84E-31   | 0.27877298 |
| MSMO1   | turquoise | 0.52543151 | 1.60E-14   | -0.3742023 | 1.55E-07   | -0.4218527 |
| MSH2    | turquoise | 0.78256985 | 1.62E-39   | -0.4419562 | 3.02E-10   | -0.6089885 |
| MS4A14  | turquoise | -0.3485185 | 1.16E-06   | 0.66364289 | 7.49E-25   | 0.38916994 |
| MRVI1   | turquoise | -0.5129484 | 8.33E-14   | 0.50634253 | 1.94E-13   | 0.36945572 |
| MRPS36  | turquoise | 0.62613454 | 1.56E-21   | -0.4312024 | 8.93E-10   | -0.29714   |
| MRPS30  | turquoise | 0.60021175 | 1.73E-19   | -0.4983946 | 5.23E-13   | -0.8737767 |
| MRPS28  | turquoise | 0.3676391  | 2.63E-07   | 0.10114701 | 0.17070581 | -0.6036181 |
| MRPS27  | turquoise | 0.5218326  | 2.60E-14   | -0.3630401 | 3.80E-07   | -0.8414455 |
| MRPS23  | turquoise | 0.62143193 | 3.79E-21   | -0.3861686 | 5.67E-08   | -0.7008308 |
| MRPS22  | turquoise | 0.42289125 | 2.01E-09   | -0.0448892 | 0.54403213 | -0.70868   |
| MRPS21  | turquoise | 0.42083436 | 2.45E-09   | -0.1763042 | 0.01636922 | -0.6365615 |
| MRPL52  | turquoise | -0.2925874 | 5.31E-05   | 0.30395308 | 2.60E-05   | 0.72665887 |
| MRPL50  | turquoise | 0.48837582 | 1.76E-12   | -0.0443877 | 0.54854527 | -0.6394512 |
| MRPL47  | turquoise | 0.59663659 | 3.20E-19   | -0.2071677 | 0.00466283 | -0.1948926 |
| MRPL45  | turquoise | 0.69566028 | 4.34E-28   | -0.3476183 | 1.25E-06   | -0.6481259 |
| MRPL40  | turquoise | 0.29772605 | 3.86E-05   | -0.1087716 | 0.14053468 | -0.5248745 |
| MRPL39  | turquoise | 0.38513836 | 6.19E-08   | 0.05010868 | 0.4981789  | -0.769389  |
| MRPL32  | turquoise | 0.63717377 | 1.84E-22   | -0.4138118 | 4.77E-09   | -0.708111  |
| MRPL3   | turquoise | 0.51693247 | 4.96E-14   | -0.2063087 | 0.00484056 | -0.8995613 |
| MRPL21  | turquoise | 0.32021244 | 8.85E-06   | -0.5566333 | 1.92E-16   | -0.5980396 |
| MRPL15  | turquoise | 0.65010233 | 1.34E-23   | -0.43309   | 7.40E-10   | -0.444976  |

|            |           |            |          |            |            |            |
|------------|-----------|------------|----------|------------|------------|------------|
| MRPL1      | turquoise | 0.79497105 | 1.40E-41 | -0.5920349 | 6.99E-19   | -0.4945133 |
| MRAP2      | turquoise | 0.60411228 | 8.75E-20 | -0.5899849 | 9.85E-19   | -0.7600689 |
| MPZL2      | turquoise | -0.3412655 | 2.00E-06 | 0.4957565  | 7.23E-13   | 0.28704882 |
| MPST       | turquoise | -0.5538614 | 2.90E-16 | 0.34113995 | 2.02E-06   | 0.8568902  |
| MPRIP      | turquoise | -0.4578275 | 5.67E-11 | 0.01677402 | 0.82071849 | 0.55894533 |
| MPPED2     | turquoise | 0.75040495 | 9.71E-35 | -0.36002   | 4.82E-07   | -0.4357224 |
| MPPED1     | turquoise | 0.56750414 | 3.68E-17 | -0.6804262 | 1.69E-26   | -0.5835705 |
| MPP1       | turquoise | 0.43371405 | 6.96E-10 | -0.7205522 | 6.46E-31   | -0.7090728 |
| MPHOSPH1   | turquoise | -0.3612493 | 4.38E-07 | 0.10657943 | 0.14875937 | 0.56197224 |
| MPC2       | turquoise | 0.38426767 | 6.67E-08 | -0.170575  | 0.02026609 | -0.815213  |
| MPC1       | turquoise | 0.31789725 | 1.04E-05 | 0.19450436 | 0.00797798 | -0.5609906 |
| MOV10      | turquoise | -0.6720412 | 1.16E-25 | 0.45922364 | 4.88E-11   | 0.65645759 |
| MOSPD2     | turquoise | -0.4692062 | 1.62E-11 | 0.13239436 | 0.07241994 | 0.54437312 |
| MORN4      | turquoise | 0.42760382 | 1.27E-09 | -0.7522791 | 5.36E-35   | -0.4209391 |
| MORF4L2    | turquoise | 0.5435913  | 1.29E-15 | -0.2926612 | 5.29E-05   | -0.9218043 |
| MOBP       | turquoise | -0.463419  | 3.08E-11 | 0.31636757 | 1.15E-05   | 0.56902241 |
| MOB4       | turquoise | 0.69461852 | 5.61E-28 | -0.5082925 | 1.51E-13   | -0.8416491 |
| MOB3A      | turquoise | -0.550906  | 4.48E-16 | 0.38226109 | 7.90E-08   | 0.78052315 |
| MOB2       | turquoise | -0.6738715 | 7.66E-26 | 0.16259834 | 0.02701343 | 0.58739425 |
| MOAP1      | turquoise | 0.65560678 | 4.22E-24 | -0.5872698 | 1.55E-18   | -0.8764391 |
| MNS1       | turquoise | 0.38988571 | 4.12E-08 | -0.2123965 | 0.00370179 | -0.3347237 |
| MNAT1      | turquoise | 0.64453221 | 4.20E-23 | -0.1422952 | 0.05334109 | -0.4383666 |
| MMD        | turquoise | 0.5728717  | 1.59E-17 | -0.2774634 | 0.00013147 | -0.7687002 |
| MMADHC     | turquoise | 0.46078553 | 4.11E-11 | 0.03492267 | 0.63698092 | -0.8033851 |
| MMAB       | turquoise | -0.4634351 | 3.08E-11 | -0.0893961 | 0.22623988 | 0.58550977 |
| MLST8      | turquoise | -0.4904477 | 1.38E-12 | 0.09414548 | 0.20242576 | 0.4052033  |
| MLKL       | turquoise | -0.5080055 | 1.57E-13 | 0.58375848 | 2.76E-18   | 0.64648875 |
| MLIP       | turquoise | 0.65137549 | 1.03E-23 | -0.6910294 | 1.35E-27   | -0.7850424 |
| MLEC       | turquoise | -0.5432128 | 1.36E-15 | 0.32805519 | 5.15E-06   | 0.06234438 |
| MKRN2      | turquoise | 0.2878465  | 7.10E-05 | 0.01069073 | 0.8851624  | -0.6571824 |
| MKL2       | turquoise | 0.71668494 | 1.86E-30 | -0.674547  | 6.57E-26   | -0.6907882 |
| MKKS       | turquoise | 0.6452285  | 3.65E-23 | -0.4883923 | 1.76E-12   | -0.3549445 |
| MIR503HG   | turquoise | -0.2884927 | 6.82E-05 | 0.34074942 | 2.07E-06   | 0.69090044 |
| MIR30C2    | turquoise | -0.4258027 | 1.52E-09 | 0.53532539 | 4.14E-15   | 0.74682657 |
| MIR300     | turquoise | -0.3895012 | 4.26E-08 | 0.19792805 | 0.0069207  | 0.77431528 |
| MIR124-2HC | turquoise | 0.52395902 | 1.96E-14 | -0.5212173 | 2.82E-14   | -0.4285427 |
| MIR1185-1  | turquoise | -0.5599948 | 1.16E-16 | 0.36447546 | 3.39E-07   | 0.78387838 |
| MIR100HG   | turquoise | -0.4636152 | 3.02E-11 | 0.33893839 | 2.37E-06   | 0.52187329 |
| MIER2      | turquoise | -0.5102523 | 1.18E-13 | -0.0311421 | 0.67389467 | 0.50579717 |
| MIDN       | turquoise | -0.4023301 | 1.37E-08 | 0.25293586 | 0.00051345 | 0.82479028 |
| MID1IP1    | turquoise | -0.530118  | 8.50E-15 | 0.54578774 | 9.42E-16   | 0.60468839 |
| MICU3      | turquoise | 0.7676192  | 3.36E-37 | -0.4996115 | 4.50E-13   | -0.4190983 |
| MICALL2    | turquoise | -0.6333148 | 3.92E-22 | 0.35498805 | 7.12E-07   | 0.4389867  |
| MICAL1     | turquoise | -0.5221593 | 2.49E-14 | -0.0072438 | 0.92204351 | 0.55872086 |
| MGST3      | turquoise | 0.49482307 | 8.11E-13 | -0.0806872 | 0.27491786 | -0.7659039 |
| MGLL       | turquoise | -0.6458095 | 3.24E-23 | 0.49683834 | 6.34E-13   | 0.37022239 |

|         |           |            |            |            |            |            |
|---------|-----------|------------|------------|------------|------------|------------|
| MGEA5   | turquoise | 0.45392959 | 8.62E-11   | -0.2136624 | 0.00349781 | -0.1963911 |
| MGAT2   | turquoise | 0.45603484 | 6.88E-11   | 0.0198778  | 0.78826723 | -0.6741474 |
| MGAT1   | turquoise | -0.7390209 | 3.21E-33   | 0.55887672 | 1.37E-16   | 0.65279808 |
| MFSD6   | turquoise | 0.63360736 | 3.71E-22   | -0.752426  | 5.12E-35   | -0.5220253 |
| MFSD4A  | turquoise | 0.71933773 | 9.02E-31   | -0.5556484 | 2.22E-16   | -0.6504427 |
| MFNG    | turquoise | -0.4902619 | 1.41E-12   | 0.71849157 | 1.14E-30   | 0.58680857 |
| MFN2    | turquoise | -0.2692117 | 0.00021097 | -0.1333477 | 0.07037007 | 0.49077672 |
| MFGE8   | turquoise | -0.5719788 | 1.83E-17   | 0.58609382 | 1.88E-18   | 0.77524675 |
| MFAP3L  | turquoise | -0.5589816 | 1.35E-16   | 0.50196791 | 3.36E-13   | 0.81655577 |
| MEX3A   | turquoise | -0.4840777 | 2.93E-12   | 0.25471806 | 0.00046709 | 0.76459455 |
| METTL9  | turquoise | 0.55119521 | 4.29E-16   | -0.2975945 | 3.89E-05   | -0.7743165 |
| METTL7B | turquoise | -0.5610945 | 9.81E-17   | 0.59763657 | 2.69E-19   | 0.5019959  |
| METTL16 | turquoise | -0.3824087 | 7.80E-08   | 0.09996811 | 0.17577102 | 0.78306462 |
| METAP1  | turquoise | 0.50015986 | 4.21E-13   | -0.3240942 | 6.78E-06   | -0.8953381 |
| MET     | turquoise | 0.62397997 | 2.35E-21   | -0.6907397 | 1.45E-27   | -0.3654353 |
| MEPE    | turquoise | 0.60464541 | 7.96E-20   | -0.6920695 | 1.05E-27   | -0.4084248 |
| MEPCE   | turquoise | -0.3923441 | 3.33E-08   | 0.09729673 | 0.18765863 | 0.77117041 |
| MEGF10  | turquoise | -0.3811566 | 8.67E-08   | 0.70618542 | 3.01E-29   | 0.39323445 |
| MEF2C   | turquoise | 0.55437207 | 2.69E-16   | -0.6103335 | 2.90E-20   | -0.4933972 |
| MED7    | turquoise | 0.65048155 | 1.24E-23   | -0.274236  | 0.00015847 | -0.6382132 |
| MED6    | turquoise | 0.54462779 | 1.11E-15   | -0.719887  | 7.76E-31   | -0.2772942 |
| MED31   | turquoise | 0.48850812 | 1.74E-12   | -0.3700351 | 2.17E-07   | -0.672854  |
| MED27   | turquoise | 0.5363149  | 3.61E-15   | -0.3660573 | 2.99E-07   | -0.781379  |
| MED22   | turquoise | -0.3161384 | 1.17E-05   | 0.18064256 | 0.01386939 | 0.84018019 |
| MED16   | turquoise | -0.5372817 | 3.15E-15   | 0.1810947  | 0.01362918 | 0.7447348  |
| MED10   | turquoise | 0.57236688 | 1.72E-17   | -0.6152922 | 1.18E-20   | -0.5822403 |
| MECOM   | turquoise | -0.5753124 | 1.08E-17   | 0.72003222 | 7.46E-31   | 0.64716809 |
| MEAF6   | turquoise | 0.68383196 | 7.61E-27   | -0.5739972 | 1.33E-17   | -0.7531992 |
| ME3     | turquoise | 0.61951174 | 5.42E-21   | -0.7376818 | 4.79E-33   | -0.5968408 |
| ME2     | turquoise | 0.26680731 | 0.00024146 | 0.31601769 | 1.18E-05   | -0.5014764 |
| ME1     | turquoise | 0.441242   | 3.25E-10   | -0.0214889 | 0.77156102 | -0.7412315 |
| MDP1    | turquoise | 0.527825   | 1.16E-14   | -0.6355326 | 2.54E-22   | -0.3854037 |
| MDH2    | turquoise | 0.58935118 | 1.10E-18   | -0.4607979 | 4.11E-11   | -0.7883106 |
| MDGA2   | turquoise | 0.56680283 | 4.10E-17   | -0.4189738 | 2.93E-09   | -0.3816321 |
| MDGA1   | turquoise | -0.4980935 | 5.43E-13   | 0.3577325  | 5.76E-07   | 0.57131967 |
| MCTP1   | turquoise | 0.45084227 | 1.20E-10   | -0.5359242 | 3.81E-15   | -0.4251656 |
| MCRS1   | turquoise | -0.3912562 | 3.66E-08   | 0.00796266 | 0.91433562 | 0.78066021 |
| MCRIP1  | turquoise | -0.5762879 | 9.24E-18   | 0.07427151 | 0.3150205  | 0.29564006 |
| MCM7    | turquoise | -0.6338806 | 3.51E-22   | 0.54355214 | 1.30E-15   | 0.70406272 |
| MCM6    | turquoise | 0.4744096  | 9.00E-12   | -0.3156752 | 1.20E-05   | -0.2443746 |
| MCM4    | turquoise | 0.58710921 | 1.59E-18   | -0.7011176 | 1.10E-28   | -0.3465897 |
| MCL1    | turquoise | -0.5333957 | 5.41E-15   | 0.67366824 | 8.03E-26   | 0.76835496 |
| MCFD2   | turquoise | 0.42734965 | 1.31E-09   | 0.01494856 | 0.83995139 | -0.5982791 |
| MCF2L   | turquoise | -0.5929849 | 5.95E-19   | 0.21570474 | 0.00319    | 0.40877111 |
| MCF2    | turquoise | 0.69698138 | 3.12E-28   | -0.7128336 | 5.24E-30   | -0.4382173 |
| MCEE    | turquoise | 0.49625622 | 6.80E-13   | 0.00361621 | 0.96103678 | -0.5838163 |

|          |           |            |            |            |            |            |
|----------|-----------|------------|------------|------------|------------|------------|
| MBTPS2   | turquoise | 0.68682696 | 3.73E-27   | -0.4498475 | 1.33E-10   | -0.8126466 |
| MBP      | turquoise | 0.63299271 | 4.18E-22   | -0.6403125 | 9.85E-23   | -0.6030478 |
| MBNL2    | turquoise | 0.5874271  | 1.51E-18   | -0.3448178 | 1.54E-06   | -0.6052941 |
| MBNL1    | turquoise | 0.48921782 | 1.59E-12   | -0.0270906 | 0.71433413 | -0.4409171 |
| MBLAC2   | turquoise | 0.74859801 | 1.71E-34   | -0.5643777 | 5.95E-17   | -0.7478556 |
| MBIP     | turquoise | 0.56384457 | 6.46E-17   | -0.0243515 | 0.7421403  | -0.6899915 |
| MB21D2   | turquoise | 0.7314402  | 2.99E-32   | -0.6616523 | 1.16E-24   | -0.4782179 |
| MAVS     | turquoise | -0.4219022 | 2.21E-09   | 0.54724248 | 7.64E-16   | 0.3832502  |
| MATR3    | turquoise | 0.65155157 | 9.90E-24   | -0.6054269 | 6.94E-20   | -0.6977941 |
| MAT2B    | turquoise | 0.68122055 | 1.41E-26   | -0.3846416 | 6.46E-08   | -0.7439111 |
| MAT2A    | turquoise | -0.5157465 | 5.79E-14   | 0.34965545 | 1.07E-06   | 0.69573215 |
| MARS2    | turquoise | 0.41447794 | 4.48E-09   | -0.1455618 | 0.0480441  | -0.797178  |
| 8-Mar    | turquoise | -0.2234078 | 0.00223707 | 0.23599735 | 0.00122087 | 0.62853314 |
| 7-Mar    | turquoise | 0.27696992 | 0.0001353  | 0.21299133 | 0.00360464 | -0.5616467 |
| 5-Mar    | turquoise | 0.51630572 | 5.39E-14   | -0.1272328 | 0.08437529 | -0.5837954 |
| 4-Mar    | turquoise | 0.27667311 | 0.00013765 | -0.6879479 | 2.85E-27   | 0.02597696 |
| 11-Mar   | turquoise | 0.66367328 | 7.44E-25   | -0.7459674 | 3.88E-34   | -0.5753175 |
| 2-Mar    | turquoise | 0.37301418 | 1.70E-07   | -0.0164088 | 0.82455861 | -0.6099681 |
| MAPT     | turquoise | 0.32335614 | 7.14E-06   | -0.6782606 | 2.80E-26   | -0.5970398 |
| MAPKAPK2 | turquoise | -0.6831035 | 9.04E-27   | 0.54001339 | 2.15E-15   | 0.72465912 |
| MAPK9    | turquoise | 0.60769879 | 4.64E-20   | -0.4885748 | 1.72E-12   | -0.888394  |
| MAPK8    | turquoise | 0.62608793 | 1.58E-21   | -0.7251195 | 1.81E-31   | -0.4451992 |
| MAPK6    | turquoise | 0.67625563 | 4.45E-26   | -0.5102641 | 1.18E-13   | -0.8034083 |
| MAPK3    | turquoise | -0.3211987 | 8.28E-06   | 0.12816661 | 0.08210224 | 0.71339141 |
| MAPK14   | turquoise | -0.360136  | 4.77E-07   | 0.20303442 | 0.00557509 | 0.79909416 |
| MAPK13   | turquoise | 0.51406477 | 7.21E-14   | -0.6763892 | 4.31E-26   | -0.467279  |
| MAPK10   | turquoise | 0.47898709 | 5.32E-12   | -0.4227109 | 2.05E-09   | -0.8657116 |
| MAPK1    | turquoise | 0.63833546 | 1.46E-22   | -0.7854833 | 5.47E-40   | -0.3495138 |
| MAP4K5   | turquoise | -0.3362115 | 2.88E-06   | 0.32270496 | 7.47E-06   | 0.60499051 |
| MAP4K4   | turquoise | -0.632062  | 5.01E-22   | 0.64943994 | 1.54E-23   | 0.42201081 |
| MAP4K3   | turquoise | 0.53439113 | 4.72E-15   | -0.1315192 | 0.07434409 | -0.8075192 |
| MAP4K2   | turquoise | -0.4504116 | 1.25E-10   | 0.27697758 | 0.00013524 | 0.80936555 |
| MAP4     | turquoise | 0.70433449 | 4.85E-29   | -0.7687464 | 2.28E-37   | -0.6623473 |
| MAP3K9   | turquoise | 0.5395775  | 2.28E-15   | -0.779436  | 5.14E-39   | -0.5628927 |
| MAP3K5   | turquoise | -0.4564002 | 6.61E-11   | 0.62945238 | 8.29E-22   | 0.5153803  |
| MAP3K11  | turquoise | -0.6562879 | 3.65E-24   | 0.30198106 | 2.95E-05   | 0.61673977 |
| MAP3K10  | turquoise | -0.498506  | 5.16E-13   | 0.23038906 | 0.0016053  | 0.58109466 |
| MAP2K4   | turquoise | 0.63138501 | 5.71E-22   | -0.6143196 | 1.41E-20   | -0.8251893 |
| MAP2K1   | turquoise | 0.63077886 | 6.42E-22   | -0.55497   | 2.46E-16   | -0.8777754 |
| MAP2     | turquoise | 0.41702402 | 3.53E-09   | -0.4076194 | 8.48E-09   | -0.3663893 |
| MAP1LC3B | turquoise | 0.27290187 | 0.00017107 | -0.0456645 | 0.53709189 | -0.7924361 |
| MAP10    | turquoise | 0.71823718 | 1.22E-30   | -0.5555551 | 2.25E-16   | -0.6846714 |
| MANF     | turquoise | -0.1560637 | 0.03389451 | 0.20599317 | 0.00490735 | 0.4933734  |
| MAN1C1   | turquoise | 0.40253829 | 1.35E-08   | -0.3185495 | 9.91E-06   | -0.7630988 |
| MAN1A1   | turquoise | 0.70931804 | 1.33E-29   | -0.2742751 | 0.00015811 | -0.6254191 |
| MALSU1   | turquoise | 0.4060908  | 9.75E-09   | -0.1605393 | 0.0290395  | -0.9043334 |

|          |           |            |            |            |            |            |
|----------|-----------|------------|------------|------------|------------|------------|
| MAL2     | turquoise | 0.74375237 | 7.67E-34   | -0.6503904 | 1.26E-23   | -0.7731813 |
| MAK16    | turquoise | 0.7561187  | 1.56E-35   | -0.4665018 | 2.19E-11   | -0.421917  |
| MAGI2    | turquoise | 0.56658023 | 4.24E-17   | -0.1025139 | 0.16496967 | -0.530798  |
| MAGEH1   | turquoise | 0.70746264 | 2.16E-29   | -0.4583091 | 5.38E-11   | -0.776507  |
| MAGEE1   | turquoise | 0.64556864 | 3.40E-23   | -0.7488041 | 1.61E-34   | -0.6332772 |
| MAFG-AS1 | turquoise | -0.3520334 | 8.93E-07   | 0.1000165  | 0.17556097 | 0.72881009 |
| MAEL     | turquoise | 0.73525744 | 9.81E-33   | -0.5504428 | 4.79E-16   | -0.5983309 |
| MAD2L2   | turquoise | -0.6560977 | 3.80E-24   | 0.30851202 | 1.93E-05   | 0.32270841 |
| MAD2L1BP | turquoise | 0.66510416 | 5.44E-25   | -0.4464372 | 1.90E-10   | -0.6505203 |
| MAD2L1   | turquoise | 0.734035   | 1.40E-32   | -0.4832341 | 3.24E-12   | -0.7366148 |
| MACF1    | turquoise | -0.4613566 | 3.86E-11   | 0.26339089 | 0.00029189 | 0.35310585 |
| LZTS2    | turquoise | -0.6550179 | 4.78E-24   | 0.16819632 | 0.02210608 | 0.54624097 |
| LZTR1    | turquoise | -0.7025285 | 7.70E-29   | 0.38471385 | 6.42E-08   | 0.59282585 |
| LZTFL1   | turquoise | 0.70439759 | 4.77E-29   | -0.5853303 | 2.13E-18   | -0.7091374 |
| LYRM7    | turquoise | 0.44081569 | 3.39E-10   | -0.4222118 | 2.15E-09   | -0.5880172 |
| LYPLAL1  | turquoise | 0.31107088 | 1.63E-05   | 0.1390698  | 0.05903701 | -0.467699  |
| LYPD1    | turquoise | -0.2949159 | 4.60E-05   | 0.42640329 | 1.43E-09   | 0.72180249 |
| LYAR     | turquoise | -0.3813734 | 8.51E-08   | 0.71100768 | 8.50E-30   | 0.41902569 |
| LY6G5C   | turquoise | -0.5001065 | 4.23E-13   | 0.49236203 | 1.09E-12   | 0.55082651 |
| LTN1     | turquoise | 0.30876857 | 1.90E-05   | -0.1748622 | 0.01728287 | -0.8096711 |
| LTBR     | turquoise | -0.6056728 | 6.64E-20   | 0.66539866 | 5.10E-25   | 0.36852716 |
| LSS      | turquoise | -0.6669244 | 3.64E-25   | 0.40365784 | 1.22E-08   | 0.2919119  |
| LSM3     | turquoise | 0.29528983 | 4.49E-05   | 0.02388608 | 0.74689986 | -0.7859037 |
| LRRTM3   | turquoise | 0.72905069 | 5.94E-32   | -0.592386  | 6.58E-19   | -0.77628   |
| LRRTM2   | turquoise | 0.65171158 | 9.58E-24   | -0.3906986 | 3.84E-08   | -0.4131518 |
| LRRTM1   | turquoise | 0.65479437 | 5.01E-24   | -0.6533062 | 6.86E-24   | -0.7167773 |
| LRRN3    | turquoise | 0.59276556 | 6.18E-19   | -0.4625777 | 3.38E-11   | -0.5625231 |
| LRRN2    | turquoise | -0.2356816 | 0.00124004 | 0.00620599 | 0.93318427 | 0.75912968 |
| LRRCC1   | turquoise | -0.4880518 | 1.83E-12   | 0.57371735 | 1.39E-17   | 0.55243924 |
| LRRCC8B  | turquoise | 0.71176472 | 6.96E-30   | -0.7849202 | 6.76E-40   | -0.6511127 |
| LRRCC8A  | turquoise | -0.5485462 | 6.32E-16   | 0.74678703 | 3.01E-34   | 0.51353981 |
| LRRCC73  | turquoise | 0.4815095  | 3.97E-12   | -0.7562064 | 1.52E-35   | -0.4485998 |
| LRRCC7   | turquoise | 0.57003109 | 2.48E-17   | -0.5707878 | 2.20E-17   | -0.3324862 |
| LRRCC4C  | turquoise | 0.60400577 | 8.91E-20   | -0.5151663 | 6.25E-14   | -0.6608135 |
| LRRCC49  | turquoise | 0.6631652  | 8.31E-25   | -0.6830075 | 9.25E-27   | -0.615644  |
| LRRCC40  | turquoise | 0.64652593 | 2.80E-23   | -0.3276468 | 5.30E-06   | -0.763653  |
| LRRCC32  | turquoise | -0.5398719 | 2.19E-15   | 0.56029304 | 1.11E-16   | 0.74318409 |
| LRRCC25  | turquoise | -0.3555944 | 6.79E-07   | 0.33045231 | 4.35E-06   | 0.51818788 |
| LRRCC2   | turquoise | 0.62321748 | 2.71E-21   | -0.6470809 | 2.50E-23   | -0.4365552 |
| LRRCC1   | turquoise | -0.4721883 | 1.16E-11   | 0.67128868 | 1.37E-25   | 0.45280406 |
| LRPPRC   | turquoise | 0.59921972 | 2.05E-19   | -0.7497447 | 1.20E-34   | -0.5580257 |
| LRPAP1   | turquoise | 0.28677127 | 7.57E-05   | -0.2649266 | 0.00026812 | -0.7696852 |
| LRP11    | turquoise | 0.63247167 | 4.63E-22   | -0.401013  | 1.54E-08   | -0.8957948 |
| LRP10    | turquoise | -0.7237528 | 2.66E-31   | 0.71881701 | 1.04E-30   | 0.47371197 |
| LRMP     | turquoise | 0.59864601 | 2.26E-19   | -0.3692493 | 2.31E-07   | -0.640238  |
| LRFN5    | turquoise | 0.69071319 | 1.46E-27   | -0.7239368 | 2.53E-31   | -0.6682894 |

|            |           |            |            |            |            |            |
|------------|-----------|------------|------------|------------|------------|------------|
| LRFN4      | turquoise | -0.5398724 | 2.19E-15   | -0.0209922 | 0.77670059 | 0.46543917 |
| LRCH1      | turquoise | 0.75406924 | 3.02E-35   | -0.6361468 | 2.25E-22   | -0.6049515 |
| LPP        | turquoise | -0.5791601 | 5.83E-18   | 0.84929086 | 1.18E-52   | 0.65619701 |
| LPAR6      | turquoise | -0.3076356 | 2.05E-05   | 0.73753115 | 5.01E-33   | 0.28507728 |
| LPAR5      | turquoise | -0.2557578 | 0.00044187 | 0.65447089 | 5.37E-24   | 0.22008452 |
| LPAR4      | turquoise | -0.252739  | 0.00051882 | 0.2570143  | 0.00041307 | 0.69795118 |
| LONRF2     | turquoise | 0.55525508 | 2.36E-16   | -0.4812273 | 4.10E-12   | -0.6088888 |
| LONRF1     | turquoise | 0.2997099  | 3.40E-05   | 0.07237279 | 0.32758549 | -0.6327483 |
| LONP2      | turquoise | 0.47852972 | 5.61E-12   | -0.4952504 | 7.69E-13   | -0.7197915 |
| LOC729970  | turquoise | -0.4107769 | 6.33E-09   | 0.48008101 | 4.68E-12   | 0.55099746 |
| LOC729860  | turquoise | 0.64462462 | 4.13E-23   | -0.5850268 | 2.24E-18   | -0.5887789 |
| LOC728554  | turquoise | 0.46336968 | 3.10E-11   | -0.6557305 | 4.11E-24   | -0.2941137 |
| LOC440040  | turquoise | 0.57814175 | 6.86E-18   | -0.6490838 | 1.65E-23   | -0.2985602 |
| LOC285147  | turquoise | 0.62558581 | 1.74E-21   | -0.5722674 | 1.75E-17   | -0.7938374 |
| LOC283713  | turquoise | 0.54306607 | 1.39E-15   | -0.6015244 | 1.38E-19   | -0.5951378 |
| LOC146880  | turquoise | 0.48492541 | 2.66E-12   | -0.1947938 | 0.00788333 | -0.834326  |
| LOC1053728 | turquoise | -0.3982506 | 1.98E-08   | 0.22959029 | 0.00166825 | 0.75114459 |
| LOC1024670 | turquoise | -0.381509  | 8.42E-08   | 0.20421971 | 0.0052984  | 0.80986671 |
| LOC1001290 | turquoise | -0.5625568 | 7.86E-17   | 0.66944058 | 2.08E-25   | 0.49494524 |
| LOC1001286 | turquoise | 0.56946773 | 2.71E-17   | -0.5949285 | 4.28E-19   | -0.5333544 |
| LNx1       | turquoise | 0.71062042 | 9.42E-30   | -0.6678691 | 2.95E-25   | -0.6207273 |
| LMTK2      | turquoise | 0.67591833 | 4.80E-26   | -0.6357748 | 2.42E-22   | -0.4689698 |
| LMO4       | turquoise | 0.47140503 | 1.27E-11   | -0.6166543 | 9.19E-21   | -0.2695101 |
| LMO3       | turquoise | 0.57220156 | 1.77E-17   | -0.5341063 | 4.91E-15   | -0.5837785 |
| LMBRD2     | turquoise | 0.66143577 | 1.21E-24   | -0.6298979 | 7.61E-22   | -0.7544917 |
| LMBRD1     | turquoise | 0.31354783 | 1.39E-05   | 0.18547393 | 0.01148486 | -0.7675483 |
| LMBR1      | turquoise | 0.64413422 | 4.56E-23   | -0.3526065 | 8.55E-07   | -0.8382638 |
| LLGL1      | turquoise | -0.4703888 | 1.42E-11   | 0.36041349 | 4.67E-07   | 0.79726104 |
| LINC00930  | turquoise | -0.3112258 | 1.62E-05   | 0.25478459 | 0.00046544 | 0.55097722 |
| LINC00672  | turquoise | 0.73559392 | 8.89E-33   | -0.6344934 | 3.12E-22   | -0.73293   |
| LINC00623  | turquoise | -0.4253346 | 1.59E-09   | 0.3732645  | 1.67E-07   | 0.46033385 |
| LINC00493  | turquoise | 0.44531092 | 2.14E-10   | 0.05717156 | 0.43953467 | -0.7015044 |
| LINC00461  | turquoise | 0.30212779 | 2.92E-05   | 0.1006505  | 0.17282572 | -0.3695764 |
| LINC00403  | turquoise | 0.45073965 | 1.21E-10   | -0.0936228 | 0.20495413 | -0.5227489 |
| LINC00320  | turquoise | -0.368124  | 2.53E-07   | 0.37822922 | 1.11E-07   | 0.65288143 |
| LINC00173  | turquoise | -0.4230902 | 1.98E-09   | 0.24705096 | 0.00069845 | 0.7894105  |
| LINC00092  | turquoise | -0.2787838 | 0.00012172 | 0.14960379 | 0.04210382 | 0.69152905 |
| LIME1      | turquoise | -0.5353561 | 4.13E-15   | 0.29174917 | 5.59E-05   | 0.86947806 |
| LILRA2     | turquoise | -0.2805451 | 0.00010976 | 0.68281566 | 9.67E-27   | 0.35799714 |
| LHX6       | turquoise | 0.52524738 | 1.65E-14   | -0.7572063 | 1.10E-35   | -0.2508991 |
| LHPP       | turquoise | -0.500189  | 4.19E-13   | 0.3973806  | 2.14E-08   | 0.77696967 |
| LGMN       | turquoise | 0.55971195 | 1.21E-16   | -0.5191362 | 3.71E-14   | -0.802516  |
| LGI4       | turquoise | -0.6267495 | 1.39E-21   | 0.33966289 | 2.25E-06   | 0.35016756 |
| LGALSL     | turquoise | 0.72920634 | 5.68E-32   | -0.4522236 | 1.03E-10   | -0.6834235 |
| LGALS8     | turquoise | 0.64149322 | 7.77E-23   | -0.7178971 | 1.34E-30   | -0.3847242 |
| LFNG       | turquoise | -0.4643879 | 2.77E-11   | 0.29244058 | 5.36E-05   | 0.80387409 |

|         |           |            |            |            |            |            |
|---------|-----------|------------|------------|------------|------------|------------|
| LDOC1L  | turquoise | 0.26729357 | 0.00023498 | -0.0514962 | 0.48634178 | -0.8356401 |
| LDLRAP1 | turquoise | -0.5179206 | 4.36E-14   | 0.36355095 | 3.65E-07   | 0.45311753 |
| LDHB    | turquoise | 0.33827692 | 2.48E-06   | 0.1935367  | 0.00830172 | -0.6224046 |
| LDHA    | turquoise | 0.42808349 | 1.22E-09   | -0.2832841 | 9.33E-05   | -0.8699483 |
| LDB2    | turquoise | 0.63542498 | 2.60E-22   | -0.7693417 | 1.86E-37   | -0.6637413 |
| LCP1    | turquoise | -0.3821706 | 7.96E-08   | 0.68459539 | 6.35E-27   | 0.20953657 |
| LCNL1   | turquoise | -0.481177  | 4.12E-12   | 0.06831565 | 0.35549914 | 0.19388759 |
| LCMT2   | turquoise | 0.40795663 | 8.22E-09   | -0.0422173 | 0.56828489 | -0.7571115 |
| LCMT1   | turquoise | 0.36501226 | 3.25E-07   | -0.8503415 | 6.53E-53   | -0.07028   |
| LCLAT1  | turquoise | 0.81159093 | 1.39E-44   | -0.4395305 | 3.87E-10   | -0.3895139 |
| LBHD1   | turquoise | -0.539711  | 2.24E-15   | 0.28417601 | 8.85E-05   | 0.7178682  |
| LARGE1  | turquoise | 0.59298973 | 5.95E-19   | -0.7292521 | 5.61E-32   | -0.4780869 |
| LAPTM5  | turquoise | -0.3954398 | 2.53E-08   | 0.54493514 | 1.07E-15   | 0.42964187 |
| LAPTM4B | turquoise | 0.34724347 | 1.28E-06   | -0.0735202 | 0.31995406 | -0.7862153 |
| LANCL2  | turquoise | 0.65295344 | 7.39E-24   | -0.5697962 | 2.57E-17   | -0.6392758 |
| LANCL1  | turquoise | 0.6500144  | 1.36E-23   | -0.5418735 | 1.65E-15   | -0.696942  |
| LAMTOR4 | turquoise | -0.6070225 | 5.23E-20   | 0.18382721 | 0.01225358 | 0.52870186 |
| LAMTOR3 | turquoise | 0.42725365 | 1.32E-09   | 0.02487475 | 0.73680145 | -0.7454558 |
| LAMP5   | turquoise | 0.59890328 | 2.17E-19   | -0.7314061 | 3.02E-32   | -0.4122368 |
| LAMP1   | turquoise | -0.4186748 | 3.02E-09   | 0.33664527 | 2.80E-06   | 0.49705739 |
| LAMA5   | turquoise | -0.6561055 | 3.80E-24   | 0.6232718  | 2.69E-21   | 0.74356262 |
| LACTB2  | turquoise | 0.49740744 | 5.91E-13   | -0.2519946 | 0.00053962 | -0.5451907 |
| LACC1   | turquoise | -0.3263013 | 5.82E-06   | 0.07690858 | 0.29809761 | 0.65028018 |
| KYAT3   | turquoise | 0.54298419 | 1.41E-15   | -0.308494  | 1.94E-05   | -0.5062946 |
| KTN1    | turquoise | -0.2413352 | 0.00093523 | 0.69145185 | 1.22E-27   | 0.17846702 |
| KTI12   | turquoise | 0.52604452 | 1.48E-14   | -0.5899276 | 9.95E-19   | -0.6671842 |
| KSR2    | turquoise | -0.3172732 | 1.08E-05   | 0.03575623 | 0.62895689 | 0.80096002 |
| KRT222  | turquoise | 0.66256131 | 9.48E-25   | -0.785913  | 4.65E-40   | -0.6601951 |
| KRCC1   | turquoise | -0.6001254 | 1.75E-19   | 0.4850924  | 2.60E-12   | 0.79310609 |
| KRAS    | turquoise | 0.39388886 | 2.91E-08   | -0.4691907 | 1.62E-11   | -0.6910176 |
| KPNB1   | turquoise | 0.33797221 | 2.54E-06   | 0.04105533 | 0.57898899 | -0.7165236 |
| KPNA3   | turquoise | 0.58134749 | 4.09E-18   | -0.124861  | 0.09037633 | -0.7773506 |
| KPNA1   | turquoise | 0.52937427 | 9.40E-15   | -0.3762028 | 1.31E-07   | -0.8408052 |
| KMT5C   | turquoise | -0.3843896 | 6.60E-08   | 0.13173312 | 0.07387004 | 0.69660282 |
| KMT2E   | turquoise | -0.5130237 | 8.25E-14   | 0.22455447 | 0.00211982 | 0.74162523 |
| KLKB1   | turquoise | -0.3976079 | 2.09E-08   | 0.27361283 | 0.00016424 | 0.83554507 |
| KLK7    | turquoise | 0.57333749 | 1.48E-17   | -0.5979022 | 2.57E-19   | -0.3083427 |
| KLHL9   | turquoise | 0.57607426 | 9.56E-18   | -0.2048197 | 0.00516308 | -0.6633802 |
| KLHL7   | turquoise | 0.51022291 | 1.18E-13   | -0.0765438 | 0.300402   | -0.8255194 |
| KLHL5   | turquoise | -0.5574156 | 1.71E-16   | 0.76142085 | 2.73E-36   | 0.26902814 |
| KLHL42  | turquoise | 0.64149163 | 7.77E-23   | -0.4758174 | 7.66E-12   | -0.7554175 |
| KLHL4   | turquoise | 0.51470766 | 6.63E-14   | -0.6365413 | 2.08E-22   | -0.6642257 |
| KLHL29  | turquoise | 0.46023785 | 4.37E-11   | -0.4583932 | 5.33E-11   | -0.2172647 |
| KLHL28  | turquoise | 0.25416734 | 0.00048099 | -0.2246179 | 0.0021135  | -0.4602668 |
| KLHL12  | turquoise | 0.6484438  | 1.89E-23   | -0.3629118 | 3.84E-07   | -0.7373236 |
| KLHDC9  | turquoise | 0.50018082 | 4.20E-13   | -0.516862  | 5.01E-14   | -0.8050017 |

|           |           |            |            |            |            |            |
|-----------|-----------|------------|------------|------------|------------|------------|
| KLHDC8B   | turquoise | -0.4372366 | 4.88E-10   | 0.37725846 | 1.20E-07   | 0.6861071  |
| KLHDC2    | turquoise | 0.54405007 | 1.21E-15   | -0.1638288 | 0.02586136 | -0.6084538 |
| KLF9      | turquoise | 0.34562224 | 1.45E-06   | 0.02395433 | 0.74620132 | -0.5544936 |
| KLF6      | turquoise | -0.5170927 | 4.86E-14   | 0.55126584 | 4.25E-16   | 0.58482952 |
| KLF2      | turquoise | -0.4668921 | 2.10E-11   | 0.63275575 | 4.38E-22   | 0.6508126  |
| KLF15     | turquoise | -0.7083197 | 1.72E-29   | 0.73839405 | 3.87E-33   | 0.62855035 |
| KLC1      | turquoise | 0.58345703 | 2.90E-18   | -0.8398586 | 1.93E-50   | -0.4855111 |
| KITLG     | turquoise | 0.77908255 | 5.85E-39   | -0.4240512 | 1.80E-09   | -0.6534953 |
| KIT       | turquoise | 0.76134703 | 2.80E-36   | -0.6638794 | 7.11E-25   | -0.4050098 |
| KIFAP3    | turquoise | 0.54920568 | 5.74E-16   | -0.6975687 | 2.70E-28   | -0.6939535 |
| KIF5B     | turquoise | -0.503624  | 2.73E-13   | 0.71429829 | 3.54E-30   | 0.20190239 |
| KIF5A     | turquoise | -0.5550794 | 2.42E-16   | 0.45564249 | 7.18E-11   | 0.48647867 |
| KIF3C     | turquoise | 0.39766596 | 2.08E-08   | -0.393357  | 3.04E-08   | -0.7222334 |
| KIF3A     | turquoise | 0.65194616 | 9.12E-24   | -0.4896564 | 1.51E-12   | -0.5869322 |
| KIF22     | turquoise | -0.2861121 | 7.88E-05   | -0.1426609 | 0.05272509 | 0.61488395 |
| KIF21A    | turquoise | 0.68364001 | 7.96E-27   | -0.5195015 | 3.54E-14   | -0.6258397 |
| KIF1C     | turquoise | -0.6642616 | 6.54E-25   | 0.54378605 | 1.26E-15   | 0.67946552 |
| KIF1BP    | turquoise | 0.49665435 | 6.48E-13   | -0.2897469 | 6.32E-05   | -0.9606569 |
| KIF19     | turquoise | -0.3899605 | 4.09E-08   | 0.52790647 | 1.15E-14   | 0.16971633 |
| KIF13B    | turquoise | -0.6252249 | 1.86E-21   | 0.48254918 | 3.51E-12   | 0.35581958 |
| KIDINS220 | turquoise | 0.39829763 | 1.97E-08   | -0.0601858 | 0.41575629 | -0.7665478 |
| KIAA2022  | turquoise | 0.81672643 | 1.43E-45   | -0.552796  | 3.39E-16   | -0.5380927 |
| KIAA1958  | turquoise | -0.6201138 | 4.85E-21   | 0.52841389 | 1.07E-14   | 0.74814661 |
| KIAA1755  | turquoise | -0.5237279 | 2.02E-14   | 0.41205333 | 5.63E-09   | 0.64585649 |
| KIAA1683  | turquoise | -0.2542853 | 0.00047798 | 0.08224059 | 0.26575241 | 0.78806495 |
| KIAA1549L | turquoise | 0.57563348 | 1.03E-17   | -0.7134044 | 4.50E-30   | -0.3488289 |
| KIAA1468  | turquoise | 0.63843898 | 1.43E-22   | -0.4523908 | 1.02E-10   | -0.7728835 |
| KIAA1217  | turquoise | 0.68957556 | 1.93E-27   | -0.6087626 | 3.84E-20   | -0.354426  |
| KIAA1211L | turquoise | 0.57553305 | 1.04E-17   | -0.6861653 | 4.37E-27   | -0.7033468 |
| KIAA0556  | turquoise | -0.4290598 | 1.10E-09   | 0.65363178 | 6.41E-24   | 0.48640215 |
| KIAA0513  | turquoise | 0.53433122 | 4.76E-15   | -0.7156405 | 2.47E-30   | -0.7022961 |
| KIAA0430  | turquoise | 0.5722308  | 1.76E-17   | -0.3062267 | 2.24E-05   | -0.5401138 |
| KIAA0368  | turquoise | 0.62125786 | 3.92E-21   | -0.4810986 | 4.16E-12   | -0.7314096 |
| KIAA0355  | turquoise | -0.4801612 | 4.64E-12   | 0.55827163 | 1.50E-16   | 0.77695325 |
| KIAA0319  | turquoise | 0.58347485 | 2.89E-18   | -0.5559512 | 2.13E-16   | -0.2205983 |
| KIAA0232  | turquoise | 0.73025122 | 4.21E-32   | -0.6038345 | 9.18E-20   | -0.4685125 |
| KHSRP     | turquoise | -0.6055775 | 6.76E-20   | 0.30991918 | 1.76E-05   | 0.84051864 |
| KHNYN     | turquoise | -0.7283856 | 7.19E-32   | 0.69028093 | 1.62E-27   | 0.56026672 |
| KHDRBS3   | turquoise | 0.2206853  | 0.00253941 | -0.4900222 | 1.45E-12   | -0.4257354 |
| KHDRBS1   | turquoise | 0.46742629 | 1.98E-11   | -0.1933887 | 0.00835226 | -0.8824599 |
| KDSR      | turquoise | -0.4105707 | 6.46E-09   | 0.58906463 | 1.15E-18   | 0.55931585 |
| KDM2A     | turquoise | -0.3756987 | 1.37E-07   | 0.24520724 | 0.00076799 | 0.76828418 |
| KCTD8     | turquoise | 0.68373443 | 7.79E-27   | -0.6733328 | 8.66E-26   | -0.6239894 |
| KCTD16    | turquoise | 0.69154936 | 1.19E-27   | -0.6123733 | 2.01E-20   | -0.7433031 |
| KCTD15    | turquoise | -0.4293929 | 1.07E-09   | 0.52519927 | 1.66E-14   | 0.66737491 |
| KCNV1     | turquoise | 0.67243155 | 1.06E-25   | -0.6369222 | 1.93E-22   | -0.7597526 |



|          |           |            |            |            |            |            |
|----------|-----------|------------|------------|------------|------------|------------|
| KCNT2    | turquoise | 0.62175316 | 3.57E-21   | -0.3492412 | 1.10E-06   | -0.4932361 |
| KCNS2    | turquoise | 0.64540814 | 3.52E-23   | -0.7886062 | 1.67E-40   | -0.4041139 |
| KCNQ5    | turquoise | 0.59640045 | 3.33E-19   | -0.5515766 | 4.06E-16   | -0.795898  |
| KCNQ3    | turquoise | 0.59258186 | 6.37E-19   | -0.5772091 | 7.97E-18   | -0.6371679 |
| KCNQ2    | turquoise | 0.2486426  | 0.00064314 | -0.616912  | 8.77E-21   | -0.2505844 |
| KCNN3    | turquoise | -0.6017004 | 1.33E-19   | 0.43575949 | 5.67E-10   | 0.77473961 |
| KCNN2    | turquoise | 0.59392507 | 5.08E-19   | -0.4255439 | 1.56E-09   | -0.4550219 |
| KCNK1    | turquoise | 0.73453317 | 1.21E-32   | -0.5949849 | 4.24E-19   | -0.6758333 |
| KCNJ8    | turquoise | -0.3937334 | 2.95E-08   | 0.66405815 | 6.84E-25   | 0.50065119 |
| KCNJ4    | turquoise | 0.33819811 | 2.50E-06   | -0.6062695 | 5.98E-20   | -0.1645008 |
| KCNJ16   | turquoise | -0.345919  | 1.42E-06   | 0.72171163 | 4.69E-31   | 0.49994306 |
| KCNJ10   | turquoise | -0.4050716 | 1.07E-08   | 0.56244426 | 7.99E-17   | 0.68034153 |
| KCNIP4   | turquoise | 0.6619824  | 1.08E-24   | -0.8026809 | 6.15E-43   | -0.6019607 |
| KCNH3    | turquoise | -0.3236409 | 7.00E-06   | -0.1259153 | 0.08766793 | 0.5687207  |
| KCNH1    | turquoise | 0.65968131 | 1.77E-24   | -0.6797752 | 1.97E-26   | -0.7359581 |
| KCNG3    | turquoise | 0.7453465  | 4.70E-34   | -0.6906085 | 1.50E-27   | -0.5729314 |
| KCNE4    | turquoise | -0.3243811 | 6.65E-06   | 0.40043703 | 1.63E-08   | 0.46682837 |
| KCND2    | turquoise | 0.76279075 | 1.73E-36   | -0.6427149 | 6.08E-23   | -0.4651509 |
| KCNB2    | turquoise | 0.58103182 | 4.31E-18   | -0.7971256 | 5.92E-42   | -0.4662484 |
| KCNB1    | turquoise | 0.24571329 | 0.00074829 | -0.619025  | 5.94E-21   | -0.3633251 |
| KCNAB1   | turquoise | 0.69697844 | 3.12E-28   | -0.7475252 | 2.40E-34   | -0.5183504 |
| KCNA4    | turquoise | 0.45303726 | 9.48E-11   | -0.552502  | 3.54E-16   | -0.7348423 |
| KBTBD7   | turquoise | 0.69444108 | 5.86E-28   | -0.2910983 | 5.82E-05   | -0.2804894 |
| KBTBD6   | turquoise | 0.78464263 | 7.50E-40   | -0.5116073 | 9.90E-14   | -0.6977863 |
| KBTBD11  | turquoise | 0.46758015 | 1.94E-11   | -0.1904399 | 0.00941752 | -0.4257289 |
| KAZN     | turquoise | -0.5199435 | 3.34E-14   | 0.1263341  | 0.08661042 | 0.65447314 |
| KATNAL1  | turquoise | 0.57266085 | 1.64E-17   | -0.6613285 | 1.24E-24   | -0.3891583 |
| KAT14    | turquoise | 0.51352436 | 7.73E-14   | -0.4106538 | 6.41E-09   | -0.6106034 |
| KANK3    | turquoise | -0.4877029 | 1.91E-12   | 0.46962498 | 1.55E-11   | 0.24710656 |
| KANK2    | turquoise | -0.520082  | 3.28E-14   | 0.80460249 | 2.76E-43   | 0.39688055 |
| KANK1    | turquoise | -0.5454458 | 9.90E-16   | 0.8403241  | 1.51E-50   | 0.13206372 |
| KALRN    | turquoise | 0.64541206 | 3.52E-23   | -0.6261554 | 1.56E-21   | -0.6603956 |
| JPH2     | turquoise | -0.4825352 | 3.52E-12   | 0.22286729 | 0.00229435 | 0.68205013 |
| JMJD8    | turquoise | -0.5509307 | 4.46E-16   | 0.18768652 | 0.01051895 | 0.80105181 |
| JKAMP    | turquoise | 0.55709632 | 1.79E-16   | -0.0562854 | 0.44666945 | -0.7578649 |
| JDP2     | turquoise | -0.3480165 | 1.21E-06   | 0.34164945 | 1.94E-06   | 0.85250647 |
| JAZF1    | turquoise | 0.72892406 | 6.16E-32   | -0.5501026 | 5.04E-16   | -0.8242633 |
| JAKMIP1  | turquoise | 0.68776982 | 2.98E-27   | -0.6142116 | 1.44E-20   | -0.7250091 |
| JAK1     | turquoise | 0.22773241 | 0.00182349 | 0.25141778 | 0.00055626 | -0.676439  |
| JAGN1    | turquoise | -0.4574467 | 5.91E-11   | 0.24045479 | 0.00097766 | 0.73552492 |
| JAG2     | turquoise | -0.387027  | 5.27E-08   | -0.1583564 | 0.03132774 | 0.3616553  |
| JADE3    | turquoise | -0.4857631 | 2.41E-12   | 0.66393372 | 7.03E-25   | 0.63117736 |
| JADE1    | turquoise | 0.59881918 | 2.20E-19   | -0.7859868 | 4.52E-40   | -0.2467654 |
| IZUMO4   | turquoise | -0.5310755 | 7.45E-15   | 0.25518063 | 0.00045571 | 0.63720895 |
| ITPRIPL2 | turquoise | -0.5315721 | 6.96E-15   | 0.48093801 | 4.24E-12   | 0.7741728  |
| ITPRIP   | turquoise | -0.5970475 | 2.98E-19   | 0.64360646 | 5.07E-23   | 0.74186813 |

|          |           |            |            |            |            |            |
|----------|-----------|------------|------------|------------|------------|------------|
| ITPR1    | turquoise | 0.59236137 | 6.61E-19   | -0.3896566 | 4.20E-08   | -0.8192978 |
| ITPKB    | turquoise | -0.7596702 | 4.88E-36   | 0.63050267 | 6.77E-22   | 0.58204854 |
| ITM2B    | turquoise | 0.2134441  | 0.00353224 | 0.15792822 | 0.03179417 | -0.8317249 |
| ITGB8    | turquoise | -0.3164257 | 1.14E-05   | 0.47627515 | 7.27E-12   | 0.57086864 |
| ITGB2    | turquoise | -0.3629999 | 3.81E-07   | 0.64716909 | 2.45E-23   | 0.022518   |
| ITGB1BP1 | turquoise | 0.31805641 | 1.03E-05   | -0.3095847 | 1.80E-05   | -0.6077382 |
| ITGAX    | turquoise | -0.3497721 | 1.06E-06   | 0.45723008 | 6.05E-11   | 0.35167585 |
| ITGA8    | turquoise | -0.3783813 | 1.09E-07   | 0.324039   | 6.81E-06   | 0.819013   |
| ITGA5    | turquoise | -0.6055348 | 6.81E-20   | 0.53341523 | 5.40E-15   | 0.62462731 |
| ITGA10   | turquoise | -0.5363207 | 3.61E-15   | 0.7271874  | 1.01E-31   | 0.67791483 |
| ITFG2    | turquoise | 0.26535149 | 0.00026187 | -0.4390783 | 4.05E-10   | -0.5345487 |
| ITFG1    | turquoise | 0.62366637 | 2.49E-21   | -0.3990673 | 1.84E-08   | -0.9279886 |
| ISYNA1   | turquoise | -0.5942549 | 4.80E-19   | 0.41825588 | 3.14E-09   | 0.55125202 |
| ISOC1    | turquoise | 0.44353137 | 2.57E-10   | 0.04309772 | 0.56023669 | -0.6540813 |
| ISG20    | turquoise | -0.3744401 | 1.52E-07   | 0.45003583 | 1.30E-10   | 0.5744634  |
| ISCU     | turquoise | 0.53607049 | 3.73E-15   | -0.4369532 | 5.02E-10   | -0.9208494 |
| ISCA1    | turquoise | 0.65039183 | 1.26E-23   | -0.2926037 | 5.31E-05   | -0.8348045 |
| IRF7     | turquoise | -0.6011358 | 1.47E-19   | 0.5346448  | 4.55E-15   | 0.74437942 |
| IRF5     | turquoise | -0.2208911 | 0.00251531 | 0.17478262 | 0.01733456 | 0.32238993 |
| IRF1     | turquoise | -0.24647   | 0.00071971 | 0.31180726 | 1.56E-05   | 0.53783454 |
| IQGAP1   | turquoise | -0.3672359 | 2.72E-07   | 0.74713257 | 2.71E-34   | 0.23723906 |
| IQCB1    | turquoise | 0.47740422 | 6.38E-12   | -0.1338915 | 0.06922206 | -0.6952302 |
| IPW      | turquoise | 0.60121666 | 1.45E-19   | -0.4194982 | 2.79E-09   | -0.3541318 |
| IPO5     | turquoise | 0.67689136 | 3.84E-26   | -0.4617516 | 3.70E-11   | -0.7687161 |
| INTU     | turquoise | 0.12792058 | 0.08269631 | 0.26672106 | 0.00024263 | -0.2601669 |
| INSM2    | turquoise | 0.50665339 | 1.86E-13   | -0.751339  | 7.23E-35   | -0.1900844 |
| INSIG2   | turquoise | 0.71290122 | 5.14E-30   | -0.4458512 | 2.02E-10   | -0.6580326 |
| INPPL1   | turquoise | -0.6855942 | 5.01E-27   | 0.54922216 | 5.73E-16   | 0.84332598 |
| INPP5K   | turquoise | -0.5763865 | 9.09E-18   | 0.14171343 | 0.05433342 | 0.59506721 |
| INPP5D   | turquoise | -0.5095575 | 1.29E-13   | 0.68666375 | 3.88E-27   | 0.64100396 |
| INPP4B   | turquoise | 0.74549782 | 4.49E-34   | -0.542326  | 1.55E-15   | -0.5698382 |
| INHBB    | turquoise | -0.5972295 | 2.89E-19   | 0.60953197 | 3.34E-20   | 0.71069321 |
| INF2     | turquoise | -0.4366508 | 5.18E-10   | 0.1825104  | 0.01290047 | 0.78401407 |
| INA      | turquoise | 0.57712748 | 8.08E-18   | -0.7387121 | 3.52E-33   | -0.7268378 |
| IMPDH1   | turquoise | -0.7251843 | 1.78E-31   | 0.32061545 | 8.61E-06   | 0.4857908  |
| IMPAD1   | turquoise | 0.6246152  | 2.09E-21   | -0.2530482 | 0.00051041 | -0.6584928 |
| IMPA1    | turquoise | 0.50869425 | 1.44E-13   | -0.2621823 | 0.00031195 | -0.5235771 |
| IMP3     | turquoise | 0.53382754 | 5.10E-15   | -0.4310403 | 9.08E-10   | -0.8063933 |
| ILK      | turquoise | -0.6347502 | 2.96E-22   | 0.65808515 | 2.49E-24   | 0.47911421 |
| ILF3     | turquoise | -0.5017827 | 3.44E-13   | 0.02392893 | 0.74646126 | 0.5588441  |
| IL4R     | turquoise | -0.5572454 | 1.75E-16   | 0.40300634 | 1.29E-08   | 0.729413   |
| IL32     | turquoise | -0.34595   | 1.41E-06   | 0.1369625  | 0.06302212 | 0.48907993 |
| IL18BP   | turquoise | -0.3204068 | 8.74E-06   | 0.17730646 | 0.01575922 | 0.43998612 |
| IL17RB   | turquoise | -0.479874  | 4.80E-12   | 0.80574811 | 1.71E-43   | 0.37109047 |
| IL17D    | turquoise | -0.4176672 | 3.32E-09   | 0.70535999 | 3.72E-29   | 0.60083105 |
| IL13RA2  | turquoise | 0.76032582 | 3.93E-36   | -0.5259237 | 1.50E-14   | -0.5486801 |

|          |           |            |            |            |            |            |
|----------|-----------|------------|------------|------------|------------|------------|
| IL10RB   | turquoise | -0.4151289 | 4.22E-09   | 0.3316232  | 4.00E-06   | 0.81150733 |
| IKZF3    | turquoise | -0.4087043 | 7.67E-09   | 0.23636792 | 0.00119872 | 0.75458009 |
| IGSF3    | turquoise | 0.7174667  | 1.50E-30   | -0.7407141 | 1.93E-33   | -0.4789131 |
| IGFBP5   | turquoise | -0.2835055 | 9.21E-05   | 0.28515239 | 8.35E-05   | 0.01160028 |
| IGF2R    | turquoise | -0.5661599 | 4.52E-17   | 0.59464747 | 4.49E-19   | 0.68405712 |
| IGF2BP2  | turquoise | -0.5044568 | 2.46E-13   | 0.4204396  | 2.55E-09   | 0.76112311 |
| IGF1     | turquoise | 1          | 0          | -0.4994094 | 4.62E-13   | -0.4582529 |
| IFT52    | turquoise | 0.61143522 | 2.38E-20   | -0.2664795 | 0.00024592 | -0.5939556 |
| IFNAR1   | turquoise | -0.4073882 | 8.66E-09   | 0.36002867 | 4.81E-07   | 0.74458961 |
| IFITM3   | turquoise | -0.6557629 | 4.08E-24   | 0.58470193 | 2.37E-18   | 0.16860703 |
| IFITM2   | turquoise | -0.701762  | 9.36E-29   | 0.63251847 | 4.58E-22   | 0.27931611 |
| IFITM1   | turquoise | -0.5698846 | 2.54E-17   | 0.58047734 | 4.71E-18   | 0.52292977 |
| IFIT1    | turquoise | 0.49554819 | 7.42E-13   | -0.410846  | 6.29E-09   | -0.7190668 |
| IFI35    | turquoise | -0.4390362 | 4.07E-10   | 0.31629777 | 1.15E-05   | 0.65683956 |
| IFI27L2  | turquoise | -0.6548511 | 4.95E-24   | 0.50437849 | 2.48E-13   | 0.69625657 |
| IFI27    | turquoise | -0.4649269 | 2.61E-11   | 0.60617288 | 6.08E-20   | 0.21590553 |
| IER5     | turquoise | 0.41022249 | 6.67E-09   | -0.419526  | 2.78E-09   | -0.6179125 |
| IER3IP1  | turquoise | 0.74526448 | 4.82E-34   | -0.2339791 | 0.00134826 | -0.5409808 |
| IER3     | turquoise | -0.4063467 | 9.52E-09   | 0.37596744 | 1.34E-07   | 0.43691054 |
| IDS      | turquoise | 0.31356857 | 1.39E-05   | -0.2511531 | 0.00056405 | -0.4677501 |
| IDI1     | turquoise | 0.58358224 | 2.84E-18   | -0.2045563 | 0.00522211 | -0.4572324 |
| IDH3A    | turquoise | 0.38316197 | 7.32E-08   | -0.6739995 | 7.44E-26   | -0.6439928 |
| ID3      | turquoise | -0.5551587 | 2.39E-16   | 0.69932412 | 1.74E-28   | 0.15464504 |
| ID2      | turquoise | 0.56982035 | 2.56E-17   | -0.1345084 | 0.06793817 | -0.7073068 |
| ID1      | turquoise | -0.3594814 | 5.03E-07   | 0.52497876 | 1.71E-14   | 0.40558641 |
| ICE1     | turquoise | 0.68241185 | 1.06E-26   | -0.2744289 | 0.00015672 | -0.5519859 |
| ICAM2    | turquoise | -0.5540974 | 2.80E-16   | 0.58079095 | 4.48E-18   | 0.40238857 |
| ICA1L    | turquoise | 0.64498881 | 3.83E-23   | -0.4870711 | 2.06E-12   | -0.7426296 |
| ICA1     | turquoise | 0.56399418 | 6.31E-17   | -0.8225878 | 9.75E-47   | -0.4688827 |
| IBTK     | turquoise | 0.55557965 | 2.25E-16   | -0.2834557 | 9.24E-05   | -0.3363951 |
| IARS     | turquoise | 0.51868588 | 3.94E-14   | -0.2744064 | 0.00015692 | -0.9197413 |
| HVCN1    | turquoise | -0.495039  | 7.89E-13   | 0.6067927  | 5.45E-20   | 0.42436939 |
| HTR4     | turquoise | 0.45023609 | 1.28E-10   | -0.6930036 | 8.35E-28   | -0.1988563 |
| HTR2C    | turquoise | 0.66176665 | 1.13E-24   | -0.4127088 | 5.29E-09   | -0.5744259 |
| HSPH1    | turquoise | 0.42697479 | 1.35E-09   | -0.2591752 | 0.00036757 | -0.5361163 |
| HSPB3    | turquoise | 0.63550213 | 2.56E-22   | -0.7688675 | 2.19E-37   | -0.4636766 |
| HSPB2    | turquoise | -0.5880029 | 1.37E-18   | 0.55534248 | 2.33E-16   | 0.64211516 |
| HSPB11   | turquoise | 0.61377785 | 1.55E-20   | -0.2541733 | 0.00048084 | -0.708748  |
| HSPB1    | turquoise | -0.6417876 | 7.33E-23   | 0.5565204  | 1.95E-16   | 0.50675737 |
| HSPA8    | turquoise | 0.2596095  | 0.000359   | 0.14916835 | 0.0427126  | -0.6767535 |
| HSPA7    | turquoise | -0.2194083 | 0.0026936  | 0.31916185 | 9.51E-06   | 0.40291819 |
| HSPA1A   | turquoise | -0.2900814 | 6.20E-05   | 0.47083769 | 1.35E-11   | 0.35667116 |
| HSPA13   | turquoise | 0.59838941 | 2.37E-19   | -0.3575451 | 5.84E-07   | -0.0672068 |
| HSPA12B  | turquoise | -0.491368  | 1.23E-12   | 0.44576218 | 2.04E-10   | 0.60073133 |
| HSPA12A  | turquoise | 0.63051762 | 6.75E-22   | -0.7041302 | 5.11E-29   | -0.4230977 |
| HSP90AB1 | turquoise | 0.25753943 | 0.00040155 | -0.4224646 | 2.10E-09   | -0.6613266 |

|           |           |            |            |            |            |            |
|-----------|-----------|------------|------------|------------|------------|------------|
| HSP90AA1  | turquoise | 0.32047348 | 8.70E-06   | 0.03540253 | 0.63235645 | -0.4864389 |
| HSF2      | turquoise | 0.66894195 | 2.33E-25   | -0.3649025 | 3.28E-07   | -0.7379744 |
| HSD17B12  | turquoise | 0.15123002 | 0.03989422 | 0.30936335 | 1.83E-05   | -0.4622111 |
| HSD17B11  | turquoise | 0.56325677 | 7.06E-17   | -0.001898  | 0.97954451 | -0.5592953 |
| HS6ST2    | turquoise | 0.76980589 | 1.58E-37   | -0.5518138 | 3.92E-16   | -0.6995252 |
| HS3ST2    | turquoise | 0.4594997  | 4.73E-11   | -0.6713787 | 1.35E-25   | -0.4492401 |
| HS1BP3    | turquoise | -0.5723178 | 1.73E-17   | 0.5696697  | 2.62E-17   | 0.3324874  |
| HPRT1     | turquoise | 0.69596454 | 4.02E-28   | -0.6711338 | 1.42E-25   | -0.8269382 |
| HPF1      | turquoise | 0.64622896 | 2.97E-23   | -0.2538051 | 0.00049033 | -0.7071652 |
| HPCAL4    | turquoise | 0.55855274 | 1.44E-16   | -0.7073599 | 2.22E-29   | -0.4974969 |
| HPCAL1    | turquoise | 0.28898161 | 6.62E-05   | -0.6296232 | 8.02E-22   | -0.2336409 |
| HP1BP3    | turquoise | -0.5329705 | 5.74E-15   | 0.43866396 | 4.22E-10   | 0.53511529 |
| HOXB6     | turquoise | -0.575358  | 1.07E-17   | 0.3608563  | 4.51E-07   | 0.61395251 |
| HOPX      | turquoise | 0.51677989 | 5.06E-14   | -0.2324493 | 0.0014528  | -0.8307452 |
| HOMER3    | turquoise | -0.5008204 | 3.87E-13   | 0.33617662 | 2.89E-06   | 0.75350994 |
| HOMER1    | turquoise | 0.77744621 | 1.06E-38   | -0.587721  | 1.44E-18   | -0.6415299 |
| HNRNPUL2  | turquoise | -0.396685  | 2.27E-08   | 0.05882062 | 0.42643133 | 0.72572164 |
| HNRNPR    | turquoise | 0.32951921 | 4.65E-06   | 0.08553001 | 0.24703895 | -0.7731927 |
| HNRNPK    | turquoise | 0.57062423 | 2.26E-17   | -0.1879783 | 0.01039708 | -0.8573025 |
| HNRNPH2   | turquoise | 0.73208183 | 2.48E-32   | -0.2293631 | 0.00168657 | -0.6027528 |
| HNRNPDL   | turquoise | 0.35953272 | 5.01E-07   | -0.0626592 | 0.39681994 | -0.6696422 |
| HNRNPD    | turquoise | 0.3819363  | 8.12E-08   | -0.0357323 | 0.62918675 | -0.3825352 |
| HNRNPC    | turquoise | 0.60168435 | 1.34E-19   | -0.3805539 | 9.12E-08   | -0.4684986 |
| HNRNPA0   | turquoise | 0.54493911 | 1.06E-15   | -0.1296047 | 0.07869828 | -0.8260967 |
| HN1       | turquoise | 0.68554766 | 5.06E-27   | -0.6092559 | 3.51E-20   | -0.8527127 |
| HMP19     | turquoise | 0.61701528 | 8.60E-21   | -0.8042495 | 3.20E-43   | -0.5479196 |
| HMOX1     | turquoise | -0.3241331 | 6.77E-06   | 0.43639119 | 5.32E-10   | 0.34856601 |
| HMGN4     | turquoise | 0.50070651 | 3.93E-13   | -0.0672138 | 0.36332973 | -0.6815102 |
| HMGCS1    | turquoise | 0.57976753 | 5.28E-18   | -0.622043  | 3.38E-21   | -0.3023593 |
| HMGCR     | turquoise | 0.54906146 | 5.86E-16   | -0.7131334 | 4.83E-30   | -0.2677988 |
| HMGCLL1   | turquoise | 0.71261286 | 5.55E-30   | -0.5226017 | 2.35E-14   | -0.8025724 |
| HMBOX1    | turquoise | -0.4901621 | 1.42E-12   | 0.55112377 | 4.34E-16   | 0.508274   |
| HLTF      | turquoise | 0.52416337 | 1.90E-14   | -0.1095324 | 0.13776303 | -0.6822491 |
| HLF       | turquoise | 0.66134978 | 1.23E-24   | -0.5256578 | 1.56E-14   | -0.7355974 |
| HLA-E     | turquoise | -0.5939003 | 5.10E-19   | 0.66727369 | 3.37E-25   | 0.21784557 |
| HLA-DRB6  | turquoise | -0.2630547 | 0.00029734 | 0.39705967 | 2.20E-08   | -0.1238483 |
| HLA-DMB   | turquoise | -0.2865896 | 7.66E-05   | 0.56681505 | 4.09E-17   | 0.38776305 |
| HLA-DMA   | turquoise | -0.4781236 | 5.87E-12   | 0.43376967 | 6.92E-10   | 0.64784214 |
| HK1       | turquoise | 0.47454736 | 8.86E-12   | -0.7360832 | 7.69E-33   | -0.630314  |
| HIVEP1    | turquoise | 0.5944932  | 4.61E-19   | -0.2537413 | 0.000492   | -0.8176872 |
| HIST2H2BE | turquoise | -0.4133509 | 4.98E-09   | 0.65479181 | 5.02E-24   | 0.23496747 |
| HIST2H2AC | turquoise | -0.3993778 | 1.79E-08   | 0.33574542 | 2.98E-06   | 0.71844132 |
| HIST1H2BK | turquoise | -0.21487   | 0.00331271 | 0.497404   | 5.91E-13   | 0.50890966 |
| HIST1H2BD | turquoise | -0.2795408 | 0.00011644 | 0.58827221 | 1.31E-18   | 0.27583223 |
| HIPK2     | turquoise | -0.7196378 | 8.31E-31   | 0.60309518 | 1.05E-19   | 0.42090929 |
| HINT1     | turquoise | 0.48731271 | 2.00E-12   | -0.2747327 | 0.000154   | -0.9371304 |

|         |           |            |            |            |            |            |
|---------|-----------|------------|------------|------------|------------|------------|
| HIKESHI | turquoise | 0.5201146  | 3.26E-14   | -0.1035662 | 0.16065259 | -0.7076176 |
| HIGD2A  | turquoise | -0.5484409 | 6.42E-16   | 0.3797403  | 9.76E-08   | 0.30106285 |
| HIGD1A  | turquoise | 0.48891312 | 1.65E-12   | -0.1216827 | 0.09894648 | -0.8234383 |
| HIF3A   | turquoise | -0.6736907 | 7.98E-26   | 0.44835088 | 1.56E-10   | 0.41092033 |
| HHATL   | turquoise | -0.252811  | 0.00051685 | 0.02825678 | 0.702606   | 0.68085766 |
| HEYL    | turquoise | -0.5435275 | 1.30E-15   | 0.67650391 | 4.20E-26   | 0.61441072 |
| HEY1    | turquoise | 0.47681334 | 6.83E-12   | -0.4478305 | 1.64E-10   | -0.2976638 |
| HEXB    | turquoise | 0.43193375 | 8.31E-10   | -0.1424553 | 0.05307058 | -0.7394247 |
| HES4    | turquoise | -0.2267481 | 0.00191096 | 0.17076794 | 0.02012283 | 0.72158748 |
| HERC6   | turquoise | 0.32446168 | 6.61E-06   | -0.4028497 | 1.31E-08   | -0.7082726 |
| HERC5   | turquoise | -0.5087914 | 1.42E-13   | 0.6129743  | 1.80E-20   | 0.73277052 |
| HERC3   | turquoise | 0.46448497 | 2.74E-11   | -0.217879  | 0.00288941 | -0.897006  |
| HERC2P2 | turquoise | -0.31629   | 1.15E-05   | 0.45310741 | 9.41E-11   | 0.50795797 |
| HEPACAM | turquoise | -0.6085965 | 3.95E-20   | 0.7002006  | 1.39E-28   | 0.52447125 |
| HENMT1  | turquoise | 0.70900633 | 1.44E-29   | -0.6599057 | 1.69E-24   | -0.7628208 |
| HELZ2   | turquoise | -0.555162  | 2.39E-16   | 0.59476816 | 4.40E-19   | 0.63048607 |
| HECTD4  | turquoise | 0.44498219 | 2.21E-10   | -0.4808665 | 4.27E-12   | -0.8512607 |
| HECTD1  | turquoise | 0.53204638 | 6.52E-15   | -0.1272005 | 0.08445484 | -0.8356875 |
| HEATR5B | turquoise | 0.60391543 | 9.05E-20   | -0.3095364 | 1.81E-05   | -0.8236877 |
| HDGFRP3 | turquoise | 0.63533356 | 2.64E-22   | -0.1586173 | 0.03104642 | -0.5441464 |
| HDAC1   | turquoise | -0.7154113 | 2.62E-30   | 0.69985133 | 1.52E-28   | 0.73647115 |
| HCP5    | turquoise | -0.4390652 | 4.06E-10   | 0.58616345 | 1.86E-18   | 0.41326335 |
| HCN1    | turquoise | 0.60913669 | 3.59E-20   | -0.6723842 | 1.07E-25   | -0.7641345 |
| HCCS    | turquoise | 0.63082805 | 6.36E-22   | -0.5285781 | 1.05E-14   | -0.8127633 |
| HBP1    | turquoise | -0.4723647 | 1.13E-11   | 0.74809526 | 2.01E-34   | 0.70279704 |
| HBEGF   | turquoise | -0.4672336 | 2.02E-11   | 0.46140694 | 3.84E-11   | 0.36845419 |
| HAVCR2  | turquoise | -0.4093498 | 7.23E-09   | 0.58475683 | 2.34E-18   | 0.53906729 |
| HAUS7   | turquoise | -0.4701516 | 1.46E-11   | 0.09219615 | 0.21197102 | 0.84686238 |
| HAUS4   | turquoise | -0.6455299 | 3.43E-23   | 0.48774624 | 1.90E-12   | 0.51961828 |
| HAGHL   | turquoise | -0.3444267 | 1.58E-06   | 0.04267915 | 0.56405594 | 0.71669654 |
| HADHA   | turquoise | -0.368464  | 2.46E-07   | 0.15597861 | 0.03399314 | 0.81481334 |
| HACL1   | turquoise | 0.61332035 | 1.69E-20   | -0.5425036 | 1.51E-15   | -0.4090338 |
| HACD3   | turquoise | 0.48398448 | 2.97E-12   | -0.0665852 | 0.36784456 | -0.7837374 |
| H3F3B   | turquoise | -0.3770688 | 1.22E-07   | 0.26412995 | 0.00028021 | 0.54821617 |
| H2AFZ   | turquoise | 0.46905065 | 1.65E-11   | -0.0972915 | 0.18768248 | -0.7782265 |
| H2AFY   | turquoise | 0.55311639 | 3.24E-16   | -0.5128078 | 8.48E-14   | -0.4653407 |
| H2AFJ   | turquoise | -0.4238071 | 1.84E-09   | 0.44091392 | 3.36E-10   | 0.54260487 |
| H1F0    | turquoise | -0.3711888 | 1.98E-07   | 0.13921    | 0.05877942 | 0.08815641 |
| GYPC    | turquoise | -0.509711  | 1.26E-13   | 0.62506197 | 1.92E-21   | 0.49138766 |
| GUSBP2  | turquoise | -0.5295851 | 9.14E-15   | 0.2093871  | 0.00423044 | 0.3331347  |
| GUSB    | turquoise | -0.5861197 | 1.87E-18   | 0.22705727 | 0.00188308 | 0.56792531 |
| GUF1    | turquoise | 0.66876968 | 2.42E-25   | -0.3497577 | 1.06E-06   | -0.520337  |
| GUCY1B3 | turquoise | 0.4517364  | 1.09E-10   | -0.7077854 | 1.98E-29   | -0.1290684 |
| GUCD1   | turquoise | -0.6656524 | 4.82E-25   | 0.61402395 | 1.49E-20   | 0.81949482 |
| GTF2H1  | turquoise | 0.807329   | 8.74E-44   | -0.4346999 | 6.30E-10   | -0.3612295 |
| GTF2A2  | turquoise | 0.23004092 | 0.00163246 | 0.22796621 | 0.00180325 | -0.6693478 |

|         |           |            |            |            |            |            |
|---------|-----------|------------|------------|------------|------------|------------|
| GSTP1   | turquoise | -0.5719564 | 1.83E-17   | 0.54177642 | 1.67E-15   | 0.73705533 |
| GSTM3   | turquoise | -0.3342773 | 3.31E-06   | 0.36169527 | 4.22E-07   | 0.64820859 |
| GSTM2   | turquoise | -0.4150107 | 4.27E-09   | 0.33519562 | 3.10E-06   | 0.6656743  |
| GSTM1   | turquoise | -0.4148968 | 4.31E-09   | 0.31896592 | 9.64E-06   | 0.67589145 |
| GSPT2   | turquoise | 0.72209852 | 4.21E-31   | -0.5423523 | 1.54E-15   | -0.7082135 |
| GSN     | turquoise | -0.5727105 | 1.63E-17   | 0.65680197 | 3.28E-24   | 0.06005297 |
| GSKIP   | turquoise | 0.5676903  | 3.57E-17   | -0.4765149 | 7.07E-12   | -0.8467626 |
| GRWD1   | turquoise | -0.3141452 | 1.33E-05   | -0.0864603 | 0.24191703 | 0.72213443 |
| GRPEL2  | turquoise | 0.64082494 | 8.89E-23   | -0.3247145 | 6.50E-06   | -0.6843224 |
| GRP     | turquoise | 0.59596309 | 3.59E-19   | -0.5323351 | 6.27E-15   | -0.3711233 |
| GRM8    | turquoise | 0.62596321 | 1.62E-21   | -0.6220044 | 3.41E-21   | -0.517144  |
| GRK5    | turquoise | -0.2293947 | 0.00168401 | 0.23373571 | 0.00136442 | 0.55781925 |
| GRIN3A  | turquoise | 0.73203605 | 2.51E-32   | -0.6891138 | 2.15E-27   | -0.277913  |
| GRIN2C  | turquoise | -0.5975152 | 2.75E-19   | 0.49818451 | 5.37E-13   | 0.78499766 |
| GRIN2A  | turquoise | 0.79135255 | 5.79E-41   | -0.6746331 | 6.44E-26   | -0.3406336 |
| GRIA4   | turquoise | 0.68034772 | 1.72E-26   | -0.669585  | 2.01E-25   | -0.6172453 |
| GRIA2   | turquoise | 0.50694115 | 1.80E-13   | -0.5601484 | 1.13E-16   | -0.6587311 |
| GREM2   | turquoise | 0.64978299 | 1.43E-23   | -0.6658859 | 4.58E-25   | -0.4666487 |
| GRB14   | turquoise | 0.59665811 | 3.19E-19   | -0.4913742 | 1.23E-12   | -0.4509538 |
| GPT2    | turquoise | -0.5355484 | 4.02E-15   | 0.63643654 | 2.13E-22   | 0.76439258 |
| GPRC5B  | turquoise | -0.5114189 | 1.01E-13   | 0.54327837 | 1.35E-15   | 0.68179622 |
| GPRASP2 | turquoise | 0.66831808 | 2.67E-25   | -0.7219369 | 4.41E-31   | -0.7786593 |
| GPRASP1 | turquoise | 0.8308054  | 1.90E-48   | -0.5978467 | 2.60E-19   | -0.5157252 |
| GPR88   | turquoise | 0.71845116 | 1.15E-30   | -0.7103645 | 1.01E-29   | -0.6178666 |
| GPR4    | turquoise | -0.495769  | 7.22E-13   | 0.61803955 | 7.12E-21   | 0.55647231 |
| GPR37L1 | turquoise | -0.6102212 | 2.96E-20   | 0.58695437 | 1.63E-18   | 0.79788536 |
| GPR22   | turquoise | 0.70222406 | 8.32E-29   | -0.5857479 | 1.99E-18   | -0.7456104 |
| GPR19   | turquoise | 0.51765893 | 4.51E-14   | -0.2298122 | 0.00165054 | -0.6499065 |
| GPR137C | turquoise | 0.70173732 | 9.42E-29   | -0.5677199 | 3.55E-17   | -0.7241597 |
| GPR137  | turquoise | -0.6168988 | 8.79E-21   | 0.30695963 | 2.14E-05   | 0.70351066 |
| GPN1    | turquoise | 0.43936484 | 3.93E-10   | -0.291837  | 5.56E-05   | -0.6341774 |
| GPM6A   | turquoise | 0.49130879 | 1.24E-12   | -0.310783  | 1.67E-05   | -0.7958452 |
| GPIHBP1 | turquoise | -0.3408734 | 2.06E-06   | 0.10946774 | 0.13799691 | 0.5767048  |
| GPBR1   | turquoise | -0.5154287 | 6.04E-14   | 0.66986073 | 1.89E-25   | 0.74514198 |
| GPC2    | turquoise | -0.3301211 | 4.45E-06   | 0.3395419  | 2.27E-06   | 0.72302057 |
| GPATCH2 | turquoise | 0.73598721 | 7.92E-33   | -0.6130671 | 1.77E-20   | -0.4939938 |
| GPAM    | turquoise | -0.3319076 | 3.92E-06   | 0.67868502 | 2.54E-26   | 0.54082344 |
| GOT2    | turquoise | 0.52780589 | 1.16E-14   | -0.7515869 | 6.68E-35   | -0.731925  |
| GOT1    | turquoise | 0.65863152 | 2.22E-24   | -0.6965859 | 3.44E-28   | -0.8150272 |
| GOPC    | turquoise | 0.70949152 | 1.27E-29   | -0.3832257 | 7.28E-08   | -0.6833645 |
| GOLT1B  | turquoise | 0.56874232 | 3.03E-17   | -0.2490744 | 0.00062884 | -0.7763335 |
| GOLPH3L | turquoise | 0.35057442 | 9.97E-07   | -0.0962368 | 0.19253486 | -0.6444581 |
| GOLIM4  | turquoise | -0.5712159 | 2.06E-17   | 0.62919593 | 8.71E-22   | 0.57152301 |
| GOLGA8B | turquoise | 0.51512346 | 6.28E-14   | -0.549714  | 5.33E-16   | -0.4863359 |
| GNPNAT1 | turquoise | -0.3036754 | 2.64E-05   | 0.06665836 | 0.3673174  | 0.7443688  |
| GNPDA2  | turquoise | 0.54139311 | 1.77E-15   | -0.0322841 | 0.66265586 | -0.6523318 |

|         |           |            |            |            |            |            |
|---------|-----------|------------|------------|------------|------------|------------|
| GNL3    | turquoise | 0.60495728 | 7.54E-20   | -0.5799669 | 5.12E-18   | -0.573277  |
| GNL1    | turquoise | -0.3981812 | 1.99E-08   | 0.19946383 | 0.0064884  | 0.83001485 |
| GNG7    | turquoise | -0.7199934 | 7.54E-31   | 0.41385132 | 4.76E-09   | 0.40947518 |
| GNG3    | turquoise | 0.54786651 | 6.98E-16   | -0.7597582 | 4.74E-36   | -0.1557485 |
| GNG2    | turquoise | 0.6360305  | 2.30E-22   | -0.4996344 | 4.49E-13   | -0.8775472 |
| GNG10   | turquoise | 0.33240706 | 3.79E-06   | -0.0177624 | 0.81034831 | -0.7938927 |
| GNB5    | turquoise | 0.60813995 | 4.29E-20   | -0.5237257 | 2.02E-14   | -0.5644879 |
| GNAI1   | turquoise | 0.53971203 | 2.24E-15   | -0.4025421 | 1.35E-08   | -0.5611706 |
| GNA12   | turquoise | -0.5982663 | 2.42E-19   | 0.77954377 | 4.94E-39   | 0.72743165 |
| GNA11   | turquoise | -0.5945746 | 4.55E-19   | 0.20736155 | 0.00462354 | 0.57666254 |
| GMPR2   | turquoise | 0.5186506  | 3.96E-14   | -0.1476928 | 0.04483064 | -0.7469356 |
| GMPR    | turquoise | -0.4730826 | 1.05E-11   | 0.56789972 | 3.46E-17   | 0.5570894  |
| GLTSCR2 | turquoise | -0.4596052 | 4.68E-11   | 0.44320669 | 2.65E-10   | 0.65888117 |
| GLT8D2  | turquoise | 0.57827992 | 6.71E-18   | -0.4621374 | 3.55E-11   | -0.704359  |
| GLS2    | turquoise | 0.60661749 | 5.62E-20   | -0.7366307 | 6.54E-33   | -0.6310819 |
| GLS     | turquoise | 0.60090043 | 1.53E-19   | -0.7172335 | 1.60E-30   | -0.5081912 |
| GLRX5   | turquoise | 0.43763821 | 4.69E-10   | -0.0541561 | 0.46407826 | -0.4927748 |
| GLRX3   | turquoise | 0.3801016  | 9.47E-08   | -0.0175459 | 0.81261773 | -0.8306951 |
| GLRX2   | turquoise | 0.62124405 | 3.93E-21   | -0.4141757 | 4.61E-09   | -0.4217404 |
| GLRX    | turquoise | 0.47859773 | 5.56E-12   | -0.319005  | 9.61E-06   | -0.8228451 |
| GLRB    | turquoise | 0.62165704 | 3.64E-21   | -0.5170345 | 4.90E-14   | -0.8907506 |
| GLRA2   | turquoise | 0.74087928 | 1.84E-33   | -0.6141156 | 1.46E-20   | -0.6658371 |
| GLMN    | turquoise | 0.74231437 | 1.19E-33   | -0.6712125 | 1.40E-25   | -0.4818565 |
| GLIPR2  | turquoise | -0.3131416 | 1.42E-05   | 0.19704733 | 0.00718002 | 0.65248459 |
| GLI3    | turquoise | -0.5416458 | 1.70E-15   | 0.64356365 | 5.12E-23   | 0.49139992 |
| GLG1    | turquoise | -0.2909244 | 5.88E-05   | 0.25305277 | 0.00051028 | 0.81561158 |
| GLCE    | turquoise | 0.68454534 | 6.43E-27   | -0.5169591 | 4.94E-14   | -0.6323491 |
| GJC2    | turquoise | -0.4881979 | 1.80E-12   | 0.01925967 | 0.794703   | 0.49770451 |
| GJA4    | turquoise | -0.5653804 | 5.10E-17   | 0.7373064  | 5.36E-33   | 0.42877592 |
| GIMAP8  | turquoise | -0.5072029 | 1.74E-13   | 0.72674839 | 1.14E-31   | 0.58019545 |
| GIMAP7  | turquoise | -0.5567603 | 1.88E-16   | 0.67833678 | 2.75E-26   | 0.55546335 |
| GIMAP5  | turquoise | -0.6800148 | 1.86E-26   | 0.49302466 | 1.01E-12   | 0.47425047 |
| GIMAP4  | turquoise | -0.4964295 | 6.66E-13   | 0.74516648 | 4.97E-34   | 0.35320264 |
| GGNBP2  | turquoise | 0.53849908 | 2.66E-15   | -0.285461  | 8.19E-05   | -0.7523905 |
| GGCT    | turquoise | 0.64632252 | 2.92E-23   | -0.4782007 | 5.82E-12   | -0.8009505 |
| GFRA2   | turquoise | 0.24500317 | 0.00077607 | -0.6275455 | 1.20E-21   | 0.15129486 |
| GFPT1   | turquoise | 0.66760844 | 3.13E-25   | -0.5191171 | 3.72E-14   | -0.4056757 |
| GFM1    | turquoise | 0.45666894 | 6.43E-11   | -0.1855728 | 0.01144008 | -0.4305341 |
| GFAP    | turquoise | -0.6977918 | 2.55E-28   | 0.50205821 | 3.32E-13   | 0.42793987 |
| GEMIN2  | turquoise | 0.7177388  | 1.40E-30   | -0.3577636 | 5.74E-07   | -0.662032  |
| GDPD3   | turquoise | -0.5337202 | 5.18E-15   | 0.38030885 | 9.31E-08   | 0.67914531 |
| GDI2    | turquoise | 0.53910191 | 2.44E-15   | -0.073089  | 0.32280854 | -0.5572701 |
| GDF11   | turquoise | -0.5766967 | 8.65E-18   | 0.50823166 | 1.53E-13   | 0.83535811 |
| GDF10   | turquoise | 0.32806972 | 5.14E-06   | -0.240495  | 0.00097569 | -0.6755532 |
| GDAP1   | turquoise | 0.60796148 | 4.43E-20   | -0.6126075 | 1.92E-20   | -0.5333288 |
| GDA     | turquoise | 0.55509217 | 2.42E-16   | -0.6567575 | 3.31E-24   | -0.3229802 |

|           |           |            |            |            |            |            |
|-----------|-----------|------------|------------|------------|------------|------------|
| GCNT1     | turquoise | 0.63727444 | 1.80E-22   | -0.6083242 | 4.15E-20   | -0.3639503 |
| GCA       | turquoise | 0.37088196 | 2.03E-07   | -0.0505911 | 0.49404626 | -0.6889624 |
| GBP2      | turquoise | -0.4907302 | 1.33E-12   | 0.48341587 | 3.17E-12   | 0.32065103 |
| GBGT1     | turquoise | -0.4293037 | 1.08E-09   | 0.60199818 | 1.27E-19   | 0.57582959 |
| GBE1      | turquoise | 0.43736309 | 4.82E-10   | 0.10107965 | 0.17099228 | -0.6969658 |
| GBAS      | turquoise | 0.34797195 | 1.21E-06   | 0.0386003  | 0.6019093  | -0.3981331 |
| GATS      | turquoise | -0.4922074 | 1.11E-12   | 0.43842698 | 4.33E-10   | 0.74687596 |
| GATB      | turquoise | 0.50430606 | 2.51E-13   | -0.520191  | 3.23E-14   | -0.0506413 |
| GATAD2A   | turquoise | -0.68942   | 2.00E-27   | 0.6407266  | 9.06E-23   | 0.71720535 |
| GAS6      | turquoise | -0.6272364 | 1.27E-21   | 0.23127923 | 0.0015377  | 0.41313397 |
| GAS2L3    | turquoise | -0.4273352 | 1.31E-09   | 0.32693052 | 5.57E-06   | 0.81229683 |
| GAS2      | turquoise | 0.72700794 | 1.06E-31   | -0.4682987 | 1.79E-11   | -0.4576101 |
| GARS      | turquoise | 0.56962701 | 2.64E-17   | -0.6734629 | 8.41E-26   | -0.7313379 |
| GAMT      | turquoise | -0.5273308 | 1.24E-14   | -0.0393407 | 0.5949541  | 0.59539693 |
| GALNTL5   | turquoise | 0.68306424 | 9.12E-27   | -0.4613092 | 3.88E-11   | -0.4249996 |
| GALNT15   | turquoise | -0.3828018 | 7.55E-08   | 0.49792108 | 5.55E-13   | 0.23072382 |
| GALNT11   | turquoise | 0.32551972 | 6.15E-06   | -0.5936323 | 5.33E-19   | -0.3978174 |
| GAL3ST4   | turquoise | -0.349323  | 1.10E-06   | 0.62679712 | 1.38E-21   | 0.69583135 |
| GAD2      | turquoise | 0.74276757 | 1.04E-33   | -0.822243  | 1.14E-46   | -0.536896  |
| GAD1      | turquoise | 0.74662691 | 3.17E-34   | -0.7379147 | 4.47E-33   | -0.7015483 |
| GABRG2    | turquoise | 0.68245306 | 1.05E-26   | -0.7192993 | 9.12E-31   | -0.6338072 |
| GABRD     | turquoise | 0.3922097  | 3.36E-08   | -0.8515736 | 3.25E-53   | -0.2795071 |
| GABRA5    | turquoise | 0.60583382 | 6.46E-20   | -0.4837496 | 3.05E-12   | -0.854725  |
| GABRA2    | turquoise | 0.41185234 | 5.73E-09   | -0.0927461 | 0.20924622 | -0.6562045 |
| GABRA1    | turquoise | 0.76758762 | 3.40E-37   | -0.7031799 | 6.52E-29   | -0.7103382 |
| GABBR2    | turquoise | 0.60294087 | 1.07E-19   | -0.7001745 | 1.40E-28   | -0.6666482 |
| GABARAPL2 | turquoise | 0.38121491 | 8.63E-08   | -0.0333138 | 0.65258723 | -0.8751755 |
| GABARAPL1 | turquoise | 0.61163978 | 2.29E-20   | -0.7090878 | 1.41E-29   | -0.8504598 |
| GAB2      | turquoise | -0.5655305 | 4.98E-17   | 0.39733193 | 2.14E-08   | 0.48567168 |
| G3BP2     | turquoise | 0.51602861 | 5.58E-14   | -0.3991888 | 1.82E-08   | -0.6971536 |
| FZD9      | turquoise | -0.5316904 | 6.85E-15   | 0.56593184 | 4.69E-17   | 0.77033477 |
| FZD4      | turquoise | -0.5907407 | 8.68E-19   | 0.57619592 | 9.37E-18   | 0.6998871  |
| FZD3      | turquoise | 0.57329596 | 1.49E-17   | -0.4035485 | 1.23E-08   | -0.7824537 |
| FYN       | turquoise | -0.5920226 | 7.00E-19   | 0.69202127 | 1.06E-27   | -0.0167852 |
| FYCO1     | turquoise | -0.5708664 | 2.18E-17   | 0.78258201 | 1.62E-39   | 0.75622836 |
| FXYD7     | turquoise | -0.1700457 | 0.02066362 | -0.4464344 | 1.90E-10   | 0.21108726 |
| FXYD6     | turquoise | 0.51585061 | 5.72E-14   | -0.8287646 | 5.15E-48   | -0.5331673 |
| FXYD5     | turquoise | -0.5960532 | 3.53E-19   | 0.49621251 | 6.84E-13   | 0.77139383 |
| FUT9      | turquoise | 0.35027361 | 1.02E-06   | 0.15644687 | 0.03345355 | -0.5794494 |
| FUNDC1    | turquoise | 0.57183304 | 1.87E-17   | -0.2062618 | 0.00485043 | -0.6519105 |
| FUCA1     | turquoise | 0.58193864 | 3.72E-18   | -0.2987019 | 3.63E-05   | -0.4922565 |
| FTL       | turquoise | -0.5413859 | 1.77E-15   | 0.62178588 | 3.55E-21   | -0.0524624 |
| FSTL5     | turquoise | 0.72712003 | 1.03E-31   | -0.7224009 | 3.87E-31   | -0.4936502 |
| FSTL3     | turquoise | -0.5939701 | 5.04E-19   | 0.242336   | 0.00088907 | 0.45086655 |
| FSTL1     | turquoise | -0.4957631 | 7.23E-13   | 0.72932113 | 5.50E-32   | 0.27711475 |
| FSD1      | turquoise | -0.3374253 | 2.64E-06   | -0.1812964 | 0.0135232  | 0.53007354 |



|          |           |            |            |            |            |            |
|----------|-----------|------------|------------|------------|------------|------------|
| FRZB     | turquoise | -0.2005151 | 0.00620655 | 0.58934884 | 1.10E-18   | 0.36871308 |
| FRRS1L   | turquoise | 0.48903568 | 1.63E-12   | -0.5189489 | 3.81E-14   | -0.5704412 |
| FRMPD4   | turquoise | 0.55582284 | 2.17E-16   | -0.5753325 | 1.08E-17   | -0.6721704 |
| FRMPD2   | turquoise | 0.50560223 | 2.13E-13   | -0.7031174 | 6.62E-29   | -0.2889747 |
| FRMD8    | turquoise | -0.3198509 | 9.08E-06   | 0.24506697 | 0.00077353 | 0.75426031 |
| FRMD4A   | turquoise | 0.49849909 | 5.16E-13   | -0.0366807 | 0.62010828 | -0.5906766 |
| FRG1     | turquoise | 0.56773039 | 3.55E-17   | -0.5065671 | 1.88E-13   | -0.0603328 |
| FRAT2    | turquoise | -0.3476816 | 1.24E-06   | 0.54789353 | 6.95E-16   | 0.16155456 |
| FRAS1    | turquoise | 0.45579394 | 7.06E-11   | -0.5264929 | 1.39E-14   | -0.3230155 |
| FOXRED2  | turquoise | -0.5224703 | 2.39E-14   | 0.16752874 | 0.02264769 | 0.8026421  |
| FOXQ1    | turquoise | -0.2982122 | 3.74E-05   | 0.52745895 | 1.22E-14   | 0.56992246 |
| FOXO4    | turquoise | -0.7297353 | 4.88E-32   | 0.59966716 | 1.90E-19   | 0.71305793 |
| FOXO1    | turquoise | -0.5025017 | 3.14E-13   | 0.82162497 | 1.53E-46   | 0.68605074 |
| FOXN3    | turquoise | -0.481801  | 3.83E-12   | 0.80746756 | 8.24E-44   | 0.4707493  |
| FOXJ3    | turquoise | 0.63930488 | 1.20E-22   | -0.6946301 | 5.60E-28   | -0.4947579 |
| FOXJ1    | turquoise | -0.4523034 | 1.02E-10   | 0.57483933 | 1.16E-17   | 0.58047392 |
| FOXG1    | turquoise | 0.4826576  | 3.47E-12   | -0.1229595 | 0.09542927 | -0.4817822 |
| FOXF1    | turquoise | -0.4521441 | 1.04E-10   | 0.62001629 | 4.94E-21   | 0.51930651 |
| FOXD1    | turquoise | -0.4721846 | 1.16E-11   | 0.79122637 | 6.08E-41   | 0.52245693 |
| FOXC1    | turquoise | -0.679025  | 2.35E-26   | 0.65713514 | 3.05E-24   | 0.79160891 |
| FOSL2    | turquoise | -0.3540498 | 7.65E-07   | 0.20794379 | 0.00450731 | 0.77811397 |
| FOPNL    | turquoise | 0.46714646 | 2.04E-11   | -0.1071387 | 0.14662739 | -0.685127  |
| FNBP4    | turquoise | 0.32159872 | 8.05E-06   | -0.0780164 | 0.29117146 | -0.6223983 |
| FN3KRP   | turquoise | 0.34563671 | 1.45E-06   | -0.4482313 | 1.57E-10   | -0.2157545 |
| FMO6P    | turquoise | -0.527313  | 1.24E-14   | 0.28208156 | 0.00010024 | 0.7117905  |
| FMO3     | turquoise | -0.3391829 | 2.33E-06   | 0.72372129 | 2.68E-31   | 0.26067924 |
| FMN2     | turquoise | 0.3753384  | 1.41E-07   | 0.14439437 | 0.0498845  | -0.6697944 |
| FLVCR2   | turquoise | -0.4982051 | 5.36E-13   | 0.38689976 | 5.33E-08   | 0.68084883 |
| FLRT3    | turquoise | 0.6785338  | 2.63E-26   | -0.672026  | 1.16E-25   | -0.4413532 |
| FLRT2    | turquoise | 0.26705825 | 0.0002381  | 0.07498608 | 0.31037421 | -0.505456  |
| FLNB     | turquoise | -0.5338203 | 5.11E-15   | 0.37537229 | 1.40E-07   | 0.39371708 |
| FKBP5    | turquoise | -0.5986192 | 2.27E-19   | 0.65401524 | 5.91E-24   | 0.29557312 |
| FKBP1B   | turquoise | 0.62066148 | 4.38E-21   | -0.6639404 | 7.02E-25   | -0.7529214 |
| FIP1L1   | turquoise | -0.5544895 | 2.64E-16   | 0.20884055 | 0.00433344 | 0.2751558  |
| FILIP1   | turquoise | 0.47565027 | 7.81E-12   | -0.3950021 | 2.63E-08   | -0.6500871 |
| FIG4     | turquoise | 0.47407817 | 9.34E-12   | -0.6428252 | 5.94E-23   | -0.4661048 |
| FHOD1    | turquoise | -0.5177574 | 4.45E-14   | 0.37119699 | 1.98E-07   | 0.67336657 |
| FHL2     | turquoise | 0.66264051 | 9.32E-25   | -0.6297797 | 7.79E-22   | -0.5674008 |
| FHL1     | turquoise | 0.39028773 | 3.98E-08   | -0.1528437 | 0.03779894 | -0.8052142 |
| FH       | turquoise | 0.72088323 | 5.90E-31   | -0.5408794 | 1.90E-15   | -0.3812269 |
| FGR      | turquoise | -0.5519112 | 3.87E-16   | 0.6552327  | 4.57E-24   | 0.75810705 |
| FGL1     | turquoise | -0.5781754 | 6.83E-18   | 0.26820917 | 0.00022322 | 0.69553454 |
| FGFRL1   | turquoise | -0.6896738 | 1.88E-27   | 0.62247796 | 3.12E-21   | 0.34279428 |
| FGFR3    | turquoise | -0.3979774 | 2.02E-08   | 0.37089643 | 2.02E-07   | 0.70021665 |
| FGFR1OP2 | turquoise | 0.6658242  | 4.64E-25   | -0.3923805 | 3.32E-08   | -0.5324201 |
| FGF9     | turquoise | 0.46429942 | 2.80E-11   | -0.7577805 | 9.08E-36   | -0.1540634 |

|         |           |            |            |            |            |            |
|---------|-----------|------------|------------|------------|------------|------------|
| FGF2    | turquoise | -0.3979522 | 2.03E-08   | 0.7879163  | 2.17E-40   | 0.35677009 |
| FGF14   | turquoise | 0.66282141 | 8.96E-25   | -0.5466257 | 8.35E-16   | -0.6838585 |
| FGF12   | turquoise | 0.64893093 | 1.71E-23   | -0.702367  | 8.02E-29   | -0.7332209 |
| FGF1    | turquoise | -0.5283707 | 1.08E-14   | 0.53209346 | 6.48E-15   | 0.21067858 |
| FGD2    | turquoise | -0.3929895 | 3.14E-08   | 0.61023265 | 2.95E-20   | 0.4610194  |
| FEZ2    | turquoise | 0.56057305 | 1.06E-16   | -0.4602203 | 4.37E-11   | -0.6620469 |
| FES     | turquoise | -0.5890474 | 1.15E-18   | 0.46921411 | 1.62E-11   | 0.61395847 |
| FERMT3  | turquoise | -0.4161995 | 3.81E-09   | 0.4705469  | 1.39E-11   | 0.4089736  |
| FEN1    | turquoise | 0.53558696 | 3.99E-15   | -0.8411682 | 9.69E-51   | -0.3710645 |
| FCRLB   | turquoise | 0.67592984 | 4.79E-26   | -0.5022856 | 3.23E-13   | -0.6967982 |
| FCN3    | turquoise | -0.2870077 | 7.47E-05   | 0.41077896 | 6.33E-09   | 0.39727787 |
| FCGRT   | turquoise | -0.6058484 | 6.44E-20   | 0.70103219 | 1.13E-28   | 0.22393673 |
| FCGR3B  | turquoise | -0.5375305 | 3.05E-15   | 0.41776511 | 3.29E-09   | 0.77776875 |
| FCGBP   | turquoise | -0.4335468 | 7.07E-10   | 0.52910371 | 9.76E-15   | 0.29977029 |
| FBXW7   | turquoise | 0.6097445  | 3.22E-20   | -0.6514749 | 1.01E-23   | -0.631423  |
| FBXO41  | turquoise | -0.4794769 | 5.02E-12   | 0.18647867 | 0.01103696 | 0.74674311 |
| FBXO34  | turquoise | 0.67775462 | 3.15E-26   | -0.5508687 | 4.50E-16   | -0.8050291 |
| FBXO33  | turquoise | 0.60318113 | 1.03E-19   | -0.4820935 | 3.70E-12   | -0.5270648 |
| FBXO3   | turquoise | 0.50465107 | 2.40E-13   | -0.0819322 | 0.26755506 | -0.7952544 |
| FBXO28  | turquoise | 0.60538537 | 6.99E-20   | -0.2857616 | 8.05E-05   | -0.5057184 |
| FBXO21  | turquoise | 0.43242493 | 7.91E-10   | -0.1393693 | 0.05848792 | -0.6347402 |
| FBXO2   | turquoise | -0.5563041 | 2.02E-16   | 0.35040569 | 1.01E-06   | 0.11531878 |
| FBXO11  | turquoise | 0.63258366 | 4.53E-22   | -0.2832511 | 9.35E-05   | -0.6047129 |
| FBXL7   | turquoise | -0.5282339 | 1.10E-14   | 0.6397037  | 1.11E-22   | 0.77360234 |
| FBXL5   | turquoise | 0.32207899 | 7.79E-06   | 0.17706306 | 0.0159055  | -0.7144852 |
| FBXL2   | turquoise | 0.64942044 | 1.54E-23   | -0.7196061 | 8.38E-31   | -0.6722287 |
| FBXL18  | turquoise | -0.2033379 | 0.00550304 | -0.0974102 | 0.18714195 | 0.55464233 |
| FBXL14  | turquoise | 0.57139609 | 2.00E-17   | -0.5517043 | 3.98E-16   | -0.6704572 |
| FBR5    | turquoise | -0.6027593 | 1.11E-19   | 0.24082783 | 0.00095947 | 0.23849314 |
| FBLN1   | turquoise | -0.5650052 | 5.40E-17   | 0.50666313 | 1.86E-13   | 0.33480185 |
| FAXC    | turquoise | 0.56576081 | 4.81E-17   | -0.6867463 | 3.80E-27   | -0.8195868 |
| FAU     | turquoise | -0.5600808 | 1.14E-16   | 0.57380286 | 1.37E-17   | 0.61175266 |
| FAT1    | turquoise | -0.3579875 | 5.65E-07   | 0.78661942 | 3.56E-40   | 0.54187233 |
| FASTKD3 | turquoise | 0.5358377  | 3.86E-15   | -0.2535135 | 0.00049798 | -0.8189262 |
| FASTKD2 | turquoise | 0.58853269 | 1.26E-18   | -0.2610087 | 0.00033266 | -0.8250245 |
| FASTK   | turquoise | -0.2528001 | 0.00051715 | 0.13226182 | 0.07270872 | 0.79811246 |
| FAR2    | turquoise | 0.67615127 | 4.55E-26   | -0.6063469 | 5.90E-20   | -0.7168723 |
| FANCL   | turquoise | 0.66124313 | 1.26E-24   | -0.4066439 | 9.27E-09   | -0.7072079 |
| FANCB   | turquoise | -0.4072353 | 8.78E-09   | 0.29681167 | 4.09E-05   | 0.77232266 |
| FAM92A1 | turquoise | 0.61647005 | 9.51E-21   | -0.3053335 | 2.38E-05   | -0.8228518 |
| FAM89A  | turquoise | -0.4810865 | 4.17E-12   | 0.68703115 | 3.55E-27   | 0.08478249 |
| FAM84B  | turquoise | -0.4014397 | 1.49E-08   | 0.71685039 | 1.78E-30   | 0.22877526 |
| FAM81A  | turquoise | 0.53151472 | 7.02E-15   | -0.7077334 | 2.01E-29   | -0.2295636 |
| FAM72B  | turquoise | -0.3611284 | 4.42E-07   | 0.21353846 | 0.00351731 | 0.77955061 |
| FAM69C  | turquoise | -0.2130291 | 0.00359855 | 0.05899682 | 0.42504473 | 0.46267145 |
| FAM69A  | turquoise | 0.53295349 | 5.76E-15   | -0.4283225 | 1.19E-09   | -0.4424605 |

|          |           |            |           |            |            |            |
|----------|-----------|------------|-----------|------------|------------|------------|
| FAM65C   | turquoise | -0.5671464 | 3.88E-17  | 0.70328925 | 6.34E-29   | 0.64881361 |
| FAM53B   | turquoise | -0.6175407 | 7.81E-21  | 0.1499903  | 0.04156956 | 0.40392469 |
| FAM50B   | turquoise | 0.36333273 | 3.71E-07  | -0.1742969 | 0.01765299 | -0.8677385 |
| FAM49B   | turquoise | 0.73347164 | 1.66E-32  | -0.3824719 | 7.76E-08   | -0.6281483 |
| FAM46A   | turquoise | -0.3544028 | 7.45E-07  | 0.61800216 | 7.17E-21   | 0.61904982 |
| FAM43B   | turquoise | -0.4200637 | 2.64E-09  | -0.0561027 | 0.44814878 | 0.45471715 |
| FAM3C    | turquoise | 0.59908655 | 2.10E-19  | -0.420989  | 2.42E-09   | -0.8228361 |
| FAM3A    | turquoise | -0.6489228 | 1.71E-23  | 0.17227349 | 0.01903474 | 0.57037284 |
| FAM229B  | turquoise | -0.4940724 | 8.88E-13  | 0.55747169 | 1.69E-16   | 0.80701771 |
| FAM220A  | turquoise | 0.57165665 | 1.92E-17  | -0.4050853 | 1.07E-08   | -0.9040605 |
| FAM217B  | turquoise | 0.51344546 | 7.81E-14  | -0.4976946 | 5.70E-13   | -0.5774233 |
| FAM216A  | turquoise | 0.62495378 | 1.96E-21  | -0.6669451 | 3.62E-25   | -0.7692336 |
| FAM215A  | turquoise | -0.4601081 | 4.43E-11  | 0.24524957 | 0.00076632 | 0.71638557 |
| FAM214B  | turquoise | -0.4987214 | 5.03E-13  | 0.1216416  | 0.09906132 | 0.69539227 |
| FAM20C   | turquoise | -0.449193  | 1.42E-10  | 0.119322   | 0.10571876 | 0.27594126 |
| FAM20B   | turquoise | 0.58359888 | 2.83E-18  | -0.6876072 | 3.10E-27   | -0.3907571 |
| FAM206A  | turquoise | 0.36599207 | 3.00E-07  | -0.0979637 | 0.18463679 | -0.7309353 |
| FAM200B  | turquoise | 0.55419315 | 2.76E-16  | -0.5105702 | 1.13E-13   | -0.5483441 |
| FAM19A2  | turquoise | 0.73433402 | 1.29E-32  | -0.6037928 | 9.25E-20   | -0.7193118 |
| FAM196A  | turquoise | 0.62499689 | 1.94E-21  | -0.3438607 | 1.65E-06   | -0.2097579 |
| FAM189A2 | turquoise | -0.5184344 | 4.07E-14  | 0.62881434 | 9.37E-22   | 0.28546829 |
| FAM188A  | turquoise | 0.65178395 | 9.44E-24  | -0.6257958 | 1.67E-21   | -0.5565689 |
| FAM181B  | turquoise | -0.5598487 | 1.18E-16  | 0.60383765 | 9.18E-20   | 0.38372942 |
| FAM179B  | turquoise | 0.61187706 | 2.19E-20  | -0.4287847 | 1.13E-09   | -0.128021  |
| FAM179A  | turquoise | -0.2214645 | 0.0024493 | 0.40037275 | 1.64E-08   | 0.59587592 |
| FAM175B  | turquoise | 0.67450526 | 6.63E-26  | -0.4504892 | 1.24E-10   | -0.4083065 |
| FAM174A  | turquoise | 0.60988331 | 3.14E-20  | -0.5523713 | 3.61E-16   | -0.8207378 |
| FAM171B  | turquoise | 0.28842389 | 6.85E-05  | 0.11490358 | 0.11936896 | -0.2591367 |
| FAM162A  | turquoise | 0.55392958 | 2.87E-16  | -0.2634855 | 0.00029037 | -0.0416157 |
| FAM135B  | turquoise | 0.63345726 | 3.82E-22  | -0.573147  | 1.52E-17   | -0.6855371 |
| FAM134B  | turquoise | 0.59354334 | 5.41E-19  | -0.6546642 | 5.15E-24   | -0.5668846 |
| FAM133CP | turquoise | -0.3569438 | 6.12E-07  | 0.07512267 | 0.30949123 | 0.78341356 |
| FAM133B  | turquoise | -0.293752  | 4.94E-05  | 0.12020698 | 0.10313842 | 0.86982085 |
| FAM131A  | turquoise | 0.55196008 | 3.84E-16  | -0.6926723 | 9.06E-28   | -0.2415012 |
| FAM126B  | turquoise | 0.49783003 | 5.61E-13  | -0.3631423 | 3.77E-07   | -0.7105721 |
| FAM122B  | turquoise | 0.43584042 | 5.62E-10  | -0.2178631 | 0.00289151 | -0.6990318 |
| FAM110D  | turquoise | -0.5620278 | 8.52E-17  | 0.52405431 | 1.93E-14   | 0.53003455 |
| FAM107A  | turquoise | -0.7389778 | 3.25E-33  | 0.71608732 | 2.19E-30   | 0.52250008 |
| FAM102B  | turquoise | 0.72182216 | 4.55E-31  | -0.6319217 | 5.15E-22   | -0.7013498 |
| FAM102A  | turquoise | -0.3516793 | 9.17E-07  | 0.2345274  | 0.0013125  | 0.81663529 |
| FAHD1    | turquoise | 0.62129204 | 3.89E-21  | -0.579611  | 5.42E-18   | -0.3410802 |
| FAH      | turquoise | -0.4380171 | 4.51E-10  | 0.48977337 | 1.49E-12   | 0.60182541 |
| FABP3    | turquoise | 0.7735041  | 4.33E-38  | -0.740757  | 1.91E-33   | -0.5067211 |
| F8       | turquoise | 0.48434845 | 2.84E-12  | -0.34359   | 1.68E-06   | -0.7355339 |
| EXTL2    | turquoise | 0.61265931 | 1.90E-20  | -0.479709  | 4.89E-12   | -0.8367715 |
| EXOSC9   | turquoise | 0.63158417 | 5.49E-22  | -0.6428203 | 5.95E-23   | -0.3112867 |

|          |           |            |          |            |            |            |
|----------|-----------|------------|----------|------------|------------|------------|
| EXOSC3   | turquoise | 0.54082919 | 1.91E-15 | -0.2395877 | 0.00102116 | -0.5763052 |
| EXOC6    | turquoise | 0.71447127 | 3.38E-30 | -0.7590592 | 5.97E-36   | -0.5598829 |
| EXOC1    | turquoise | 0.5423606  | 1.54E-15 | -0.3042455 | 2.55E-05   | -0.6705433 |
| EVI5L    | turquoise | -0.5970155 | 3.00E-19 | 0.16681675 | 0.0232379  | 0.59016933 |
| ETV6     | turquoise | -0.4969813 | 6.22E-13 | 0.29560302 | 4.41E-05   | 0.7880337  |
| ETS1     | turquoise | -0.4439477 | 2.46E-10 | 0.77683717 | 1.32E-38   | 0.50140188 |
| ESRRG    | turquoise | 0.55972196 | 1.21E-16 | -0.5276232 | 1.19E-14   | -0.4161193 |
| ESD      | turquoise | 0.35980064 | 4.90E-07 | 0.0728576  | 0.32434692 | -0.7737855 |
| ESAM     | turquoise | -0.6633722 | 7.95E-25 | 0.70932176 | 1.33E-29   | 0.38632595 |
| ERO1A    | turquoise | 0.66358827 | 7.58E-25 | -0.365224  | 3.19E-07   | -0.4868831 |
| ERLEC1   | turquoise | 0.68827495 | 2.64E-27 | -0.6863347 | 4.20E-27   | -0.7706672 |
| ERICH3   | turquoise | 0.64176652 | 7.36E-23 | -0.6815732 | 1.30E-26   | -0.8205513 |
| ERICH1   | turquoise | 0.56098286 | 9.98E-17 | -0.059431  | 0.42163916 | -0.6055797 |
| ERH      | turquoise | 0.34225018 | 1.86E-06 | -0.1071245 | 0.14668098 | -0.4729951 |
| ERCC1    | turquoise | -0.3781224 | 1.12E-07 | 0.07945256 | 0.28235344 | 0.67617801 |
| ERC2     | turquoise | 0.66798158 | 2.88E-25 | -0.7164311 | 1.99E-30   | -0.5477672 |
| ERC1     | turquoise | -0.4900684 | 1.44E-12 | 0.30465511 | 2.48E-05   | 0.64366436 |
| EPT1     | turquoise | 0.68121608 | 1.41E-26 | -0.6545065 | 5.33E-24   | -0.4555043 |
| EPS15    | turquoise | 0.6773187  | 3.48E-26 | -0.5416937 | 1.69E-15   | -0.6352293 |
| EPOR     | turquoise | -0.4938031 | 9.18E-13 | 0.70381556 | 5.54E-29   | 0.40946571 |
| EPN2     | turquoise | -0.6613015 | 1.25E-24 | 0.40806072 | 8.14E-09   | 0.62773536 |
| EPM2AIP1 | turquoise | 0.54622382 | 8.85E-16 | -0.7327581 | 2.04E-32   | -0.6631727 |
| EPM2A    | turquoise | -0.3565367 | 6.32E-07 | 0.51076254 | 1.10E-13   | 0.6282118  |
| EPHX4    | turquoise | 0.6950312  | 5.07E-28 | -0.6303158 | 7.02E-22   | -0.7145772 |
| EPHX2    | turquoise | -0.3343363 | 3.30E-06 | 0.53523392 | 4.20E-15   | 0.47012111 |
| EPHA5    | turquoise | 0.63005583 | 7.38E-22 | -0.775353  | 2.24E-38   | -0.4457514 |
| EPHA4    | turquoise | 0.68957754 | 1.92E-27 | -0.5900228 | 9.79E-19   | -0.7931212 |
| EPHA3    | turquoise | 0.66857274 | 2.52E-25 | -0.4187202 | 3.00E-09   | -0.5800488 |
| EPCAM    | turquoise | 0.60735064 | 4.94E-20 | -0.4735137 | 9.96E-12   | -0.5644154 |
| EPB41L4B | turquoise | 0.46795637 | 1.86E-11 | -0.768796  | 2.24E-37   | -0.3172362 |
| EPB41L3  | turquoise | 0.6196771  | 5.26E-21 | -0.5285552 | 1.05E-14   | -0.8869429 |
| EPB41L2  | turquoise | -0.464708  | 2.67E-11 | 0.68467223 | 6.24E-27   | 0.21809544 |
| ENY2     | turquoise | 0.36901214 | 2.36E-07 | -0.0043208 | 0.95345315 | -0.757527  |
| ENTPD3   | turquoise | 0.73548888 | 9.17E-33 | -0.6377893 | 1.63E-22   | -0.7504978 |
| ENTPD2   | turquoise | -0.4468692 | 1.82E-10 | 0.2873903  | 7.30E-05   | 0.53892335 |
| ENPP5    | turquoise | 0.49623469 | 6.82E-13 | -0.3587903 | 5.30E-07   | -0.5285824 |
| ENPP4    | turquoise | 0.3990851  | 1.83E-08 | 0.00304588 | 0.96717812 | -0.7962527 |
| ENOPH1   | turquoise | 0.5292014  | 9.63E-15 | -0.1864452 | 0.01105163 | -0.8119339 |
| ENHO     | turquoise | -0.6495515 | 1.50E-23 | 0.54304495 | 1.40E-15   | 0.54177516 |
| ENC1     | turquoise | 0.62749342 | 1.21E-21 | -0.7183929 | 1.17E-30   | -0.6319818 |
| EMX2OS   | turquoise | -0.6771803 | 3.59E-26 | 0.81855871 | 6.24E-46   | 0.49163855 |
| EML1     | turquoise | 0.44867266 | 1.50E-10 | -0.2996604 | 3.42E-05   | -0.5830951 |
| EMILIN2  | turquoise | -0.3355111 | 3.03E-06 | 0.63616447 | 2.24E-22   | 0.56535582 |
| EMC7     | turquoise | 0.33309243 | 3.61E-06 | 0.05258606 | 0.47715117 | -0.7623706 |
| EMC4     | turquoise | 0.44528355 | 2.14E-10 | -0.1061412 | 0.15044619 | -0.8441471 |
| EMC1     | turquoise | 0.67085898 | 1.51E-25 | -0.5961904 | 3.45E-19   | -0.2936047 |

|          |           |            |            |            |            |            |
|----------|-----------|------------|------------|------------|------------|------------|
| ELOVL4   | turquoise | 0.62042304 | 4.58E-21   | -0.7969288 | 6.41E-42   | -0.4791616 |
| ELMOD1   | turquoise | 0.68097883 | 1.49E-26   | -0.5985362 | 2.31E-19   | -0.8179522 |
| ELMO1    | turquoise | 0.4729391  | 1.06E-11   | -0.6537328 | 6.27E-24   | -0.5300334 |
| ELK1     | turquoise | -0.3074973 | 2.07E-05   | 0.14087143 | 0.05579665 | 0.6108478  |
| ELAVL4   | turquoise | 0.52567137 | 1.55E-14   | -0.7146165 | 3.25E-30   | -0.7486867 |
| ELAVL3   | turquoise | -0.4386371 | 4.24E-10   | 0.18385854 | 0.01223855 | 0.87650629 |
| ELAVL2   | turquoise | 0.65480294 | 5.00E-24   | -0.5375934 | 3.02E-15   | -0.7509456 |
| EIF4G2   | turquoise | 0.28783902 | 7.10E-05   | 0.22729009 | 0.00186233 | -0.7293862 |
| EIF4G1   | turquoise | -0.6686867 | 2.46E-25   | 0.4240248  | 1.80E-09   | 0.59292029 |
| EIF4EBP3 | turquoise | -0.4771997 | 6.53E-12   | 0.30055185 | 3.23E-05   | 0.70859256 |
| EIF4E3   | turquoise | 0.56784604 | 3.49E-17   | -0.3999404 | 1.70E-08   | -0.808546  |
| EIF4A2   | turquoise | 0.63711721 | 1.86E-22   | -0.5269766 | 1.30E-14   | -0.7473022 |
| EIF3M    | turquoise | 0.57652367 | 8.90E-18   | -0.2574214 | 0.00040412 | -0.0656051 |
| EIF3J    | turquoise | 0.37144573 | 1.94E-07   | 0.11056907 | 0.1340536  | -0.6845311 |
| EIF2S1   | turquoise | 0.6525701  | 8.01E-24   | -0.4914837 | 1.21E-12   | -0.0168468 |
| EIF2D    | turquoise | -0.4650985 | 2.56E-11   | 0.40560239 | 1.02E-08   | 0.70704107 |
| EIF2B4   | turquoise | -0.4930738 | 1.00E-12   | 0.40775418 | 8.37E-09   | 0.48787314 |
| EIF2B3   | turquoise | 0.62118572 | 3.97E-21   | -0.7232992 | 3.02E-31   | -0.1353292 |
| EIF1B    | turquoise | 0.5207987  | 2.98E-14   | -0.2741764 | 0.00015901 | -0.9155095 |
| EIF1AX   | turquoise | 0.73500582 | 1.06E-32   | -0.436021  | 5.52E-10   | -0.3932539 |
| EID2     | turquoise | 0.58010381 | 5.00E-18   | -0.451811  | 1.08E-10   | -0.9171573 |
| EID1     | turquoise | 0.60601993 | 6.25E-20   | -0.3474065 | 1.27E-06   | -0.5938123 |
| EHD2     | turquoise | -0.5227749 | 2.29E-14   | 0.37447585 | 1.51E-07   | 0.80385248 |
| EHBP1L1  | turquoise | -0.5449767 | 1.06E-15   | 0.14918338 | 0.04269147 | 0.21123419 |
| EGR3     | turquoise | 0.70998306 | 1.11E-29   | -0.6656228 | 4.85E-25   | -0.5808256 |
| EGR1     | turquoise | 0.46465003 | 2.69E-11   | -0.5587955 | 1.39E-16   | -0.383729  |
| EFR3B    | turquoise | 0.35773079 | 5.76E-07   | -0.4782454 | 5.79E-12   | -0.6321174 |
| EFNB3    | turquoise | 0.55388528 | 2.89E-16   | -0.7062834 | 2.93E-29   | -0.1343799 |
| EFNA1    | turquoise | -0.4522536 | 1.03E-10   | 0.37266505 | 1.75E-07   | 0.54122633 |
| EFHD1    | turquoise | -0.6012865 | 1.43E-19   | 0.62936391 | 8.43E-22   | 0.1238945  |
| EFCAB7   | turquoise | 0.61936866 | 5.57E-21   | -0.2412403 | 0.00093973 | -0.7666456 |
| EFCAB14  | turquoise | -0.5545014 | 2.64E-16   | 0.87890435 | 9.86E-61   | 0.39302506 |
| EEF2K    | turquoise | -0.3816004 | 8.35E-08   | 0.3907833  | 3.81E-08   | 0.69207688 |
| EEF1E1   | turquoise | 0.63580651 | 2.41E-22   | -0.355437  | 6.88E-07   | -0.886582  |
| EEF1D    | turquoise | -0.6427853 | 5.99E-23   | 0.34835664 | 1.18E-06   | 0.37609926 |
| EDN1     | turquoise | -0.3796033 | 9.88E-08   | 0.11728451 | 0.11185246 | 0.49881699 |
| ECHDC1   | turquoise | 0.64725763 | 2.41E-23   | -0.0588008 | 0.42658742 | -0.3395665 |
| ECE2     | turquoise | -0.1429444 | 0.05225148 | 0.20122946 | 0.00602131 | 0.67434913 |
| ECD      | turquoise | 0.51078137 | 1.10E-13   | -0.0989402 | 0.18027765 | -0.7527171 |
| EBNA1BP2 | turquoise | 0.62870211 | 9.58E-22   | -0.5175406 | 4.58E-14   | -0.8329013 |
| EBI3     | turquoise | -0.3906078 | 3.87E-08   | 0.60594469 | 6.33E-20   | 0.22378313 |
| EARS2    | turquoise | 0.49341251 | 9.62E-13   | -0.2781398 | 0.00012639 | -0.6575411 |
| EAPP     | turquoise | 0.71064477 | 9.36E-30   | -0.2645178 | 0.00027426 | -0.5609626 |
| EAF1     | turquoise | 0.76528367 | 7.46E-37   | -0.4905596 | 1.36E-12   | -0.4938631 |
| DYRK1A   | turquoise | 0.64542334 | 3.51E-23   | -0.2496003 | 0.00061183 | -0.804285  |
| DYNLT3   | turquoise | 0.52613641 | 1.46E-14   | -0.3251991 | 6.28E-06   | -0.9183788 |

|          |           |            |            |            |            |            |
|----------|-----------|------------|------------|------------|------------|------------|
| DYNLL1   | turquoise | 0.48857535 | 1.72E-12   | -0.2715475 | 0.00018482 | -0.8963558 |
| DYNC2L11 | turquoise | 0.60458371 | 8.05E-20   | -0.2583661 | 0.00038403 | -0.7957153 |
| DYNC111  | turquoise | 0.66372568 | 7.36E-25   | -0.6578137 | 2.64E-24   | -0.856761  |
| DUSP8    | turquoise | -0.4570494 | 6.17E-11   | 0.32145333 | 8.14E-06   | 0.26514365 |
| DUSP3    | turquoise | -0.1997414 | 0.00641291 | -0.0419492 | 0.57074578 | 0.65726256 |
| DUSP28   | turquoise | 0.45580522 | 7.05E-11   | -0.5119457 | 9.48E-14   | -0.6411294 |
| DUSP23   | turquoise | -0.5236364 | 2.04E-14   | 0.47475681 | 8.65E-12   | 0.64473633 |
| DUSP18   | turquoise | -0.4932444 | 9.82E-13   | 0.45810649 | 5.50E-11   | 0.53454823 |
| DUSP14   | turquoise | 0.36430081 | 3.44E-07   | -0.5469595 | 7.96E-16   | -0.4235685 |
| DUSP11   | turquoise | 0.52988665 | 8.77E-15   | -0.1424404 | 0.0530958  | -0.6023876 |
| DUSP1    | turquoise | -0.361936  | 4.14E-07   | 0.37315718 | 1.68E-07   | 0.15574605 |
| DUS4L    | turquoise | 0.60382223 | 9.20E-20   | -0.2850749 | 8.39E-05   | -0.463813  |
| DTX1     | turquoise | -0.3877641 | 4.94E-08   | 0.1836323  | 0.0123475  | 0.7503297  |
| DTNA     | turquoise | -0.3896213 | 4.21E-08   | 0.60472568 | 7.85E-20   | 0.35192496 |
| DTD1     | turquoise | 0.38867635 | 4.57E-08   | -0.6239779 | 2.35E-21   | -0.4591127 |
| DSTN     | turquoise | 0.64775755 | 2.17E-23   | -0.5746294 | 1.20E-17   | -0.7104575 |
| DSE      | turquoise | -0.3110667 | 1.63E-05   | 0.79747781 | 5.14E-42   | 0.07519156 |
| DRG2     | turquoise | -0.5247822 | 1.75E-14   | 0.08246195 | 0.26446352 | 0.64578409 |
| DRG1     | turquoise | 0.50485538 | 2.34E-13   | -0.4156443 | 4.02E-09   | -0.8702904 |
| DRD3     | turquoise | -0.2712974 | 0.00018747 | -0.1323967 | 0.07241475 | 0.6553484  |
| DRAM1    | turquoise | -0.4389538 | 4.10E-10   | 0.77534203 | 2.25E-38   | 0.35400682 |
| DPYSL3   | turquoise | -0.4788955 | 5.37E-12   | 0.64466048 | 4.10E-23   | 0.49949638 |
| DPYSL2   | turquoise | 0.49218256 | 1.12E-12   | -0.2131165 | 0.00358448 | -0.8087486 |
| DPY30    | turquoise | 0.4155253  | 4.06E-09   | -0.0021826 | 0.97647757 | -0.8159546 |
| DPY19L1  | turquoise | 0.55947662 | 1.25E-16   | -0.2993094 | 3.49E-05   | -0.7705881 |
| DPP9     | turquoise | -0.641172  | 8.29E-23   | 0.24133397 | 0.00093529 | 0.40008141 |
| DPP8     | turquoise | 0.49331827 | 9.73E-13   | -0.2551063 | 0.00045752 | -0.8866795 |
| DPP10    | turquoise | 0.70499346 | 4.09E-29   | -0.7432313 | 9.00E-34   | -0.6388242 |
| DPM1     | turquoise | 0.55823094 | 1.51E-16   | -0.1626959 | 0.02692048 | -0.8493256 |
| DPF2     | turquoise | -0.6924789 | 9.50E-28   | 0.49630262 | 6.77E-13   | 0.50437963 |
| DOK6     | turquoise | 0.63479936 | 2.94E-22   | -0.4992612 | 4.70E-13   | -0.686862  |
| DOHH     | turquoise | -0.4038817 | 1.19E-08   | -0.1116277 | 0.13034526 | 0.56411129 |
| DOCK6    | turquoise | -0.684174  | 7.02E-27   | 0.64709684 | 2.49E-23   | 0.5300935  |
| DOCK3    | turquoise | 0.55572843 | 2.20E-16   | -0.5591967 | 1.31E-16   | -0.8862722 |
| DOCK1    | turquoise | -0.6589086 | 2.09E-24   | 0.74793701 | 2.11E-34   | 0.49241543 |
| DNM3     | turquoise | 0.64087096 | 8.81E-23   | -0.6788563 | 2.44E-26   | -0.7881114 |
| DNM1L    | turquoise | 0.64134696 | 8.00E-23   | -0.568803  | 3.00E-17   | -0.7963222 |
| DNHD1    | turquoise | -0.559906  | 1.17E-16   | 0.13740002 | 0.06217708 | 0.46767503 |
| DNER     | turquoise | 0.39728575 | 2.15E-08   | 0.05382934 | 0.46678286 | -0.7986534 |
| DNASE1L1 | turquoise | 0.2312434  | 0.00154037 | 0.06830451 | 0.35557779 | -0.6801711 |
| DNAL11   | turquoise | -0.3782548 | 1.11E-07   | 0.61887194 | 6.11E-21   | 0.7314185  |
| DNAL4    | turquoise | 0.34662911 | 1.34E-06   | -0.639991  | 1.05E-22   | -0.1920394 |
| DNAJC7   | turquoise | 0.55676049 | 1.88E-16   | -0.5593944 | 1.27E-16   | -0.3752415 |
| DNAJC27  | turquoise | 0.59974322 | 1.87E-19   | -0.7023944 | 7.97E-29   | -0.4627975 |
| DNAJC25  | turquoise | 0.73144318 | 2.99E-32   | -0.4263043 | 1.45E-09   | -0.4831857 |
| DNAJC19  | turquoise | 0.69116841 | 1.31E-27   | -0.3176105 | 1.06E-05   | -0.7085818 |

|         |           |            |            |            |            |            |
|---------|-----------|------------|------------|------------|------------|------------|
| DNAJC12 | turquoise | 0.62765029 | 1.17E-21   | -0.4964721 | 6.63E-13   | -0.793314  |
| DNAJC10 | turquoise | 0.6025273  | 1.15E-19   | -0.2881279 | 6.98E-05   | -0.6308226 |
| DNAJB9  | turquoise | 0.55796684 | 1.57E-16   | -0.3092677 | 1.84E-05   | -0.571945  |
| DNAJB6  | turquoise | 0.49979797 | 4.40E-13   | -0.1394145 | 0.0584054  | -0.8174494 |
| DNAJB2  | turquoise | -0.6729767 | 9.39E-26   | 0.23772797 | 0.00112052 | 0.65174327 |
| DNAJA4  | turquoise | 0.40308752 | 1.28E-08   | -0.1263663 | 0.08652946 | -0.6151218 |
| DNAJA3  | turquoise | 0.59716851 | 2.92E-19   | -0.5326089 | 6.04E-15   | -0.2595675 |
| DNAJA2  | turquoise | 0.61732055 | 8.13E-21   | -0.5442584 | 1.17E-15   | -0.6047011 |
| DNAAF2  | turquoise | 0.61622638 | 9.94E-21   | -0.127024  | 0.08489058 | -0.73987   |
| DMXL2   | turquoise | 0.63719308 | 1.83E-22   | -0.4645267 | 2.73E-11   | -0.8509978 |
| DMWD    | turquoise | -0.7018714 | 9.10E-29   | 0.27213242 | 0.00017876 | 0.27705865 |
| DLX1    | turquoise | 0.74077901 | 1.89E-33   | -0.7255401 | 1.61E-31   | -0.5806735 |
| DLK2    | turquoise | 0.52996362 | 8.68E-15   | -0.7011994 | 1.08E-28   | -0.0387569 |
| DLGAP2  | turquoise | 0.49513306 | 7.80E-13   | -0.7399271 | 2.45E-33   | -0.3260192 |
| DLG3    | turquoise | 0.65361656 | 6.43E-24   | -0.8033738 | 4.61E-43   | -0.2824143 |
| DLG2    | turquoise | 0.37476102 | 1.48E-07   | -0.6142617 | 1.42E-20   | -0.3056285 |
| DLD     | turquoise | 0.58947718 | 1.07E-18   | -0.1571707 | 0.03263373 | -0.7870414 |
| DKK3    | turquoise | 0.58380894 | 2.74E-18   | -0.3599357 | 4.85E-07   | -0.698352  |
| DIS3L2  | turquoise | -0.441227  | 3.25E-10   | -0.0097281 | 0.89544075 | 0.77176475 |
| DIRAS2  | turquoise | 0.59189866 | 7.15E-19   | -0.6069221 | 5.33E-20   | -0.7632    |
| DIP2C   | turquoise | -0.3165938 | 1.13E-05   | -0.0203603 | 0.78325374 | 0.51248725 |
| DIEXF   | turquoise | 0.66356495 | 7.62E-25   | -0.6015452 | 1.37E-19   | -0.537936  |
| DIAPH3  | turquoise | -0.2381359 | 0.001098   | 0.53717689 | 3.20E-15   | 0.6207688  |
| DIAPH2  | turquoise | -0.2362556 | 0.00120539 | 0.08892423 | 0.22870998 | 0.73746833 |
| DHX36   | turquoise | 0.61493839 | 1.26E-20   | -0.3881687 | 4.78E-08   | -0.7997296 |
| DHX34   | turquoise | -0.6215874 | 3.68E-21   | 0.24986857 | 0.00060332 | 0.77379888 |
| DHX29   | turquoise | 0.52475255 | 1.76E-14   | -0.2367284 | 0.00117752 | -0.8482052 |
| DHRS7   | turquoise | 0.30049977 | 3.24E-05   | 0.26853461 | 0.00021917 | -0.6506738 |
| DHRS4   | turquoise | -0.5925695 | 6.38E-19   | 0.4191858  | 2.87E-09   | 0.63332148 |
| DHRS3   | turquoise | -0.6079322 | 4.45E-20   | 0.70271592 | 7.34E-29   | 0.5639466  |
| DHCR24  | turquoise | 0.56483339 | 5.55E-17   | -0.7774187 | 1.07E-38   | -0.3549598 |
| DGKI    | turquoise | 0.71075893 | 9.08E-30   | -0.586214  | 1.84E-18   | -0.6628272 |
| DGKD    | turquoise | -0.3857539 | 5.87E-08   | 0.09270962 | 0.209426   | 0.64112159 |
| DGKB    | turquoise | 0.66764657 | 3.10E-25   | -0.7454966 | 4.49E-34   | -0.4053162 |
| DGCR8   | turquoise | -0.4207252 | 2.48E-09   | 0.06577672 | 0.37370217 | 0.5010687  |
| DGCR6L  | turquoise | -0.670545  | 1.62E-25   | 0.11600968 | 0.11582962 | 0.50454935 |
| DGCR6   | turquoise | -0.5383026 | 2.73E-15   | 0.1470363  | 0.04580092 | 0.67205511 |
| DGCR11  | turquoise | -0.514484  | 6.83E-14   | 0.26394558 | 0.00028308 | 0.75461541 |
| DGAT1   | turquoise | -0.4350131 | 6.11E-10   | 0.14041525 | 0.0566029  | 0.82933908 |
| DFNA5   | turquoise | 0.58886882 | 1.19E-18   | -0.3163504 | 1.15E-05   | -0.4814577 |
| DERL1   | turquoise | 0.68004342 | 1.85E-26   | -0.2747639 | 0.00015372 | -0.665523  |
| DENND5A | turquoise | -0.4813337 | 4.05E-12   | 0.71822219 | 1.22E-30   | 0.47294068 |
| DEF8    | turquoise | -0.4584813 | 5.28E-11   | 0.19538689 | 0.00769254 | 0.469316   |
| DEF6    | turquoise | -0.3802767 | 9.33E-08   | 0.30987196 | 1.77E-05   | 0.76196261 |
| DDX56   | turquoise | -0.4480241 | 1.61E-10   | 0.06176743 | 0.40358741 | 0.28478033 |
| DDX39A  | turquoise | -0.5631118 | 7.22E-17   | 0.30948402 | 1.81E-05   | 0.66976692 |

|          |           |            |            |            |            |            |
|----------|-----------|------------|------------|------------|------------|------------|
| DDX25    | turquoise | 0.68224948 | 1.11E-26   | -0.6016772 | 1.34E-19   | -0.7091351 |
| DDX10    | turquoise | 0.67810119 | 2.91E-26   | -0.8173935 | 1.06E-45   | -0.5984418 |
| DDX1     | turquoise | 0.62673455 | 1.40E-21   | -0.4211188 | 2.39E-09   | -0.8753922 |
| DDR2     | turquoise | -0.4994256 | 4.61E-13   | 0.54766071 | 7.19E-16   | 0.49226848 |
| DDR1     | turquoise | -0.6944909 | 5.79E-28   | 0.59766858 | 2.68E-19   | 0.18660915 |
| DDIT4L   | turquoise | -0.529765  | 8.92E-15   | 0.68575667 | 4.82E-27   | 0.62076822 |
| DDIT4    | turquoise | -0.6133848 | 1.67E-20   | 0.60858884 | 3.96E-20   | 0.61800029 |
| DDAH2    | turquoise | -0.6227106 | 2.99E-21   | 0.55111087 | 4.35E-16   | 0.62671315 |
| DCXR     | turquoise | -0.7241758 | 2.36E-31   | 0.36914222 | 2.33E-07   | 0.74736225 |
| DCUN1D4  | turquoise | 0.58823912 | 1.32E-18   | -0.5297774 | 8.90E-15   | -0.1645677 |
| DCTPP1   | turquoise | 0.42404548 | 1.80E-09   | -0.4019747 | 1.42E-08   | -0.6107017 |
| DCTN3    | turquoise | 0.3216158  | 8.05E-06   | -0.2668212 | 0.00024127 | -0.8418123 |
| DCTN2    | turquoise | 0.45900194 | 4.99E-11   | -0.7948092 | 1.49E-41   | -0.418204  |
| DCP2     | turquoise | 0.69202174 | 1.06E-27   | -0.4337039 | 6.96E-10   | -0.5566407 |
| DCLK1    | turquoise | 0.67499284 | 5.94E-26   | -0.6519113 | 9.19E-24   | -0.8144047 |
| DCK      | turquoise | 0.53249453 | 6.13E-15   | -0.2166614 | 0.00305442 | -0.8729064 |
| DCAKD    | turquoise | -0.362365  | 4.01E-07   | 0.21826055 | 0.00283939 | 0.72533703 |
| DCAF6    | turquoise | 0.67675247 | 3.97E-26   | -0.5024085 | 3.18E-13   | -0.8310359 |
| DCAF4    | turquoise | 0.63570116 | 2.46E-22   | -0.611402  | 2.39E-20   | -0.7292611 |
| DCAF16   | turquoise | 0.63470359 | 2.99E-22   | -0.4479771 | 1.62E-10   | -0.5862449 |
| DCAF12   | turquoise | -0.41926   | 2.85E-09   | 0.78617401 | 4.21E-40   | 0.58076057 |
| DBN1     | turquoise | -0.358457  | 5.44E-07   | 0.16156881 | 0.02801084 | 0.7856168  |
| DBI      | turquoise | -0.5647449 | 5.62E-17   | 0.76437995 | 1.01E-36   | 0.38683936 |
| DAZAP2   | turquoise | 0.21602748 | 0.00314366 | 0.17794648 | 0.01538015 | -0.6260956 |
| DAXX     | turquoise | -0.528324  | 1.09E-14   | 0.19195839 | 0.00885482 | 0.25349815 |
| DAW1     | turquoise | 0.65297473 | 7.35E-24   | -0.5415718 | 1.72E-15   | -0.5892241 |
| DAPK1    | turquoise | 0.58912817 | 1.14E-18   | -0.5139754 | 7.29E-14   | -0.7386576 |
| DANCR    | turquoise | -0.4511794 | 1.15E-10   | 0.65660882 | 3.41E-24   | 0.48171977 |
| DAG1     | turquoise | -0.6430904 | 5.63E-23   | 0.57570401 | 1.01E-17   | 0.45314222 |
| DACH2    | turquoise | 0.68610657 | 4.43E-27   | -0.6754934 | 5.29E-26   | -0.7771681 |
| DAB2     | turquoise | -0.3468568 | 1.32E-06   | 0.39946846 | 1.77E-08   | 0.72893955 |
| DAAM2    | turquoise | -0.627506  | 1.20E-21   | 0.48910278 | 1.62E-12   | 0.40894161 |
| CYTH4    | turquoise | -0.4379324 | 4.55E-10   | 0.42092002 | 2.43E-09   | 0.26836789 |
| CYTH2    | turquoise | -0.6097648 | 3.21E-20   | 0.3711902  | 1.98E-07   | 0.52569226 |
| CYTH1    | turquoise | -0.4297541 | 1.03E-09   | 0.11954    | 0.10507847 | 0.4538777  |
| CYP4X1   | turquoise | 0.66566519 | 4.81E-25   | -0.7179053 | 1.33E-30   | -0.6206084 |
| CYP4A11  | turquoise | 0.37204993 | 1.84E-07   | -0.7337345 | 1.53E-32   | -0.2088297 |
| CYP2E1   | turquoise | 0.5344078  | 4.71E-15   | -0.6690935 | 2.25E-25   | -0.3822416 |
| CYP2C8   | turquoise | 0.34665812 | 1.34E-06   | -0.6426966 | 6.10E-23   | -0.5897441 |
| CYP27A1  | turquoise | -0.6122364 | 2.06E-20   | 0.46535043 | 2.49E-11   | 0.43505165 |
| CYP26B1  | turquoise | 0.60676025 | 5.48E-20   | -0.5925388 | 6.42E-19   | -0.7426932 |
| CYCS     | turquoise | 0.58238803 | 3.45E-18   | -0.2352833 | 0.00126462 | -0.5144967 |
| CYB5D2   | turquoise | 0.32808147 | 5.14E-06   | -0.2910609 | 5.83E-05   | -0.7110635 |
| CXXC1    | turquoise | -0.6260565 | 1.59E-21   | 0.32711851 | 5.50E-06   | 0.73784168 |
| CXorf57  | turquoise | 0.52115936 | 2.84E-14   | -0.1240953 | 0.09238487 | -0.6391693 |
| CXorf40B | turquoise | 0.61569005 | 1.10E-20   | -0.2209906 | 0.00250374 | -0.6081873 |



|          |           |            |            |            |            |            |
|----------|-----------|------------|------------|------------|------------|------------|
| CXorf40A | turquoise | 0.53424981 | 4.81E-15   | -0.2820972 | 0.00010015 | -0.6357425 |
| CXCL16   | turquoise | -0.4391849 | 4.01E-10   | 0.73518877 | 1.00E-32   | 0.55398432 |
| CXADR    | turquoise | 0.60119476 | 1.46E-19   | -0.4963297 | 6.74E-13   | -0.7525618 |
| CUX2     | turquoise | 0.47785321 | 6.06E-12   | -0.490482  | 1.37E-12   | -0.3433627 |
| CUX1     | turquoise | -0.4766967 | 6.92E-12   | 0.53440173 | 4.71E-15   | 0.55221281 |
| CUL5     | turquoise | 0.59716913 | 2.92E-19   | -0.1548381 | 0.03533827 | -0.5157965 |
| CUL2     | turquoise | 0.66488426 | 5.71E-25   | -0.446732  | 1.84E-10   | -0.7820606 |
| CTXN2    | turquoise | 0.40824406 | 8.00E-09   | -0.6164634 | 9.52E-21   | -0.5499836 |
| CTSH     | turquoise | -0.6036891 | 9.42E-20   | 0.61765515 | 7.64E-21   | 0.41596045 |
| CTPS1    | turquoise | 0.53132433 | 7.20E-15   | -0.3359702 | 2.93E-06   | -0.6471942 |
| CTNNA3   | turquoise | -0.3644913 | 3.39E-07   | 0.19730476 | 0.00710334 | 0.5527929  |
| CTIF     | turquoise | -0.5158117 | 5.74E-14   | -0.0512545 | 0.48839325 | 0.18247185 |
| CTH      | turquoise | 0.39896611 | 1.85E-08   | -0.0610772 | 0.4088716  | -0.3094913 |
| CTDSPL   | turquoise | -0.5982427 | 2.43E-19   | 0.58059977 | 4.62E-18   | 0.80024443 |
| CTDSP2   | turquoise | -0.6020327 | 1.26E-19   | 0.79820403 | 3.84E-42   | 0.71514418 |
| CTDSP1   | turquoise | -0.6261764 | 1.55E-21   | 0.54202474 | 1.61E-15   | 0.66205877 |
| CSTF3    | turquoise | 0.43189972 | 8.34E-10   | -0.4316984 | 8.50E-10   | -0.2370354 |
| CSTF2T   | turquoise | 0.56248117 | 7.95E-17   | -0.0486756 | 0.51056244 | -0.5861487 |
| CSRP2    | turquoise | -0.4689321 | 1.67E-11   | 0.7330327  | 1.88E-32   | 0.38137881 |
| CSRP1    | turquoise | -0.7186853 | 1.08E-30   | 0.52684891 | 1.33E-14   | 0.28815903 |
| CSRNP2   | turquoise | 0.45143898 | 1.12E-10   | -0.2871947 | 7.38E-05   | -0.898972  |
| CSNK1G3  | turquoise | 0.54930045 | 5.66E-16   | -0.1906046 | 0.00935502 | -0.8394427 |
| CSNK1A1  | turquoise | 0.34069353 | 2.08E-06   | 0.09920305 | 0.17911713 | -0.6871422 |
| CSMD3    | turquoise | 0.64782692 | 2.14E-23   | -0.5506647 | 4.64E-16   | -0.5497688 |
| CSK      | turquoise | -0.672006  | 1.17E-25   | 0.44076911 | 3.41E-10   | 0.39809969 |
| CSF3R    | turquoise | -0.3686762 | 2.42E-07   | 0.64499719 | 3.83E-23   | 0.46868244 |
| CSF1R    | turquoise | -0.48706   | 2.06E-12   | 0.69299353 | 8.37E-28   | 0.53391925 |
| CSE1L    | turquoise | 0.59856686 | 2.30E-19   | -0.533307  | 5.48E-15   | -0.6300513 |
| CSDC2    | turquoise | -0.2081916 | 0.00445865 | -0.005093  | 0.94514644 | 0.60163114 |
| CSAD     | turquoise | 0.31868581 | 9.82E-06   | -0.0133437 | 0.8569391  | -0.7366858 |
| CRYZL1   | turquoise | 0.49320948 | 9.86E-13   | -0.1551828 | 0.03492709 | -0.5803798 |
| CRYM     | turquoise | 0.68608275 | 4.46E-27   | -0.8114325 | 1.49E-44   | -0.6958628 |
| CRYAB    | turquoise | -0.5675902 | 3.63E-17   | 0.53410709 | 4.91E-15   | 0.10113455 |
| CRTC3    | turquoise | -0.6726944 | 1.00E-25   | 0.38530198 | 6.10E-08   | 0.73973377 |
| CRTAP    | turquoise | -0.3611945 | 4.39E-07   | 0.30612245 | 2.26E-05   | 0.77666644 |
| CROCC    | turquoise | -0.4283223 | 1.19E-09   | -0.0344375 | 0.6416706  | 0.74401648 |
| CRK      | turquoise | -0.4212512 | 2.36E-09   | 0.58741878 | 1.51E-18   | 0.25667345 |
| CRISPLD2 | turquoise | -0.4349202 | 6.17E-10   | 0.56187377 | 8.72E-17   | 0.32551701 |
| CRIP1    | turquoise | -0.4903026 | 1.40E-12   | 0.59807159 | 2.50E-19   | 0.53514746 |
| CRHBP    | turquoise | 0.57715135 | 8.05E-18   | -0.5254969 | 1.59E-14   | -0.6942035 |
| CRH      | turquoise | 0.657982   | 2.55E-24   | -0.607136  | 5.13E-20   | -0.4204405 |
| CREG2    | turquoise | 0.60552453 | 6.82E-20   | -0.729559  | 5.14E-32   | -0.6533118 |
| CRBN     | turquoise | 0.5438786  | 1.24E-15   | -0.3331749 | 3.59E-06   | -0.6872812 |
| CRACR2B  | turquoise | -0.5540755 | 2.81E-16   | 0.34166036 | 1.94E-06   | 0.56493721 |
| CPSF1    | turquoise | -0.5148128 | 6.54E-14   | 0.30878038 | 1.90E-05   | 0.66374491 |
| CPNE8    | turquoise | 0.48651703 | 2.20E-12   | -0.0986789 | 0.18143664 | -0.2447752 |

|          |           |            |            |            |            |            |
|----------|-----------|------------|------------|------------|------------|------------|
| CPNE4    | turquoise | 0.62120054 | 3.96E-21   | -0.6257216 | 1.69E-21   | -0.695852  |
| CPM      | turquoise | -0.533792  | 5.13E-15   | 0.27828059 | 0.00012536 | 0.66918757 |
| CPEB3    | turquoise | -0.3427783 | 1.79E-06   | 0.23092791 | 0.00156406 | 0.62253037 |
| CPEB2    | turquoise | 0.3241082  | 6.78E-06   | -0.0854237 | 0.24762901 | -0.5527253 |
| CPE      | turquoise | 0.2166312  | 0.00305862 | 0.27451374 | 0.00015596 | -0.5985993 |
| COX7B    | turquoise | 0.66271829 | 9.16E-25   | -0.186554  | 0.01100401 | -0.5639437 |
| COX7A2L  | turquoise | 0.65634024 | 3.61E-24   | -0.7045053 | 4.64E-29   | -0.6623544 |
| COX7A2   | turquoise | 0.47584272 | 7.64E-12   | -0.034673  | 0.63939252 | -0.7337384 |
| COX6C    | turquoise | 0.5589674  | 1.35E-16   | -0.3119877 | 1.54E-05   | -0.779792  |
| COX5A    | turquoise | 0.59176338 | 7.31E-19   | -0.5246559 | 1.78E-14   | -0.802094  |
| COX10    | turquoise | 0.42230202 | 2.13E-09   | -0.4397016 | 3.80E-10   | -0.285989  |
| CORT     | turquoise | 0.59411619 | 4.91E-19   | -0.6200353 | 4.92E-21   | -0.6238404 |
| COQ10B   | turquoise | 0.66085913 | 1.37E-24   | -0.3851146 | 6.20E-08   | -0.5529467 |
| COPS8    | turquoise | 0.65756015 | 2.79E-24   | -0.403716  | 1.21E-08   | -0.6847062 |
| COPS5    | turquoise | 0.54379427 | 1.25E-15   | -0.1291609 | 0.07973625 | -0.7833808 |
| COPS4    | turquoise | 0.65620717 | 3.72E-24   | -0.3385468 | 2.44E-06   | -0.8340047 |
| COPS3    | turquoise | 0.67127782 | 1.38E-25   | -0.5981845 | 2.45E-19   | -0.6844653 |
| COPS2    | turquoise | 0.69175674 | 1.13E-27   | -0.142529  | 0.05294656 | -0.4823151 |
| COPG2IT1 | turquoise | 0.51985172 | 3.38E-14   | -0.7351658 | 1.01E-32   | -0.4799308 |
| COPG2    | turquoise | 0.32916298 | 4.76E-06   | -0.2574571 | 0.00040334 | -0.0990926 |
| COPG1    | turquoise | 0.40961591 | 7.05E-09   | -0.6265743 | 1.44E-21   | -0.7308873 |
| COPA     | turquoise | 0.40924488 | 7.30E-09   | -0.3023773 | 2.87E-05   | -0.7591862 |
| COMTD1   | turquoise | -0.4168261 | 3.59E-09   | -0.0625635 | 0.39754289 | 0.63055419 |
| COMMMD3  | turquoise | 0.38756542 | 5.03E-08   | 0.04515311 | 0.54166477 | -0.6292201 |
| COMMMD10 | turquoise | 0.5582306  | 1.51E-16   | -0.0550838 | 0.45644779 | -0.6508416 |
| COLGALT2 | turquoise | -0.3238432 | 6.90E-06   | 0.14565366 | 0.04790177 | 0.33925597 |
| COLGALT1 | turquoise | -0.6605576 | 1.46E-24   | 0.44532893 | 2.13E-10   | 0.65995404 |
| COLEC12  | turquoise | -0.255215  | 0.00045487 | 0.7293586  | 5.44E-32   | -0.0401169 |
| COL9A1   | turquoise | -0.3575371 | 5.85E-07   | 0.61207739 | 2.12E-20   | 0.28594084 |
| COL6A1   | turquoise | -0.6419084 | 7.15E-23   | 0.25318782 | 0.00050665 | 0.45092432 |
| COL5A2   | turquoise | 0.55522568 | 2.37E-16   | -0.5991983 | 2.06E-19   | -0.3654227 |
| COL24A1  | turquoise | 0.61574801 | 1.09E-20   | -0.5381121 | 2.81E-15   | -0.6372234 |
| COL20A1  | turquoise | -0.5664531 | 4.32E-17   | 0.27961016 | 0.00011597 | 0.50876373 |
| COL1A2   | turquoise | -0.4207345 | 2.48E-09   | 0.70978776 | 1.17E-29   | 0.09116323 |
| COL18A1  | turquoise | -0.5132319 | 8.03E-14   | 0.45730625 | 6.00E-11   | 0.75407218 |
| COL16A1  | turquoise | -0.3326416 | 3.72E-06   | 0.16682597 | 0.02323018 | 0.78774686 |
| COCH     | turquoise | 0.63255814 | 4.55E-22   | -0.3769949 | 1.23E-07   | -0.5537277 |
| COBLL1   | turquoise | -0.3074838 | 2.07E-05   | 0.60710782 | 5.15E-20   | 0.52951123 |
| COBL     | turquoise | -0.3459471 | 1.41E-06   | 0.4825195  | 3.52E-12   | 0.1455471  |
| COA1     | turquoise | 0.42638553 | 1.43E-09   | -0.2247091 | 0.00210444 | -0.8000986 |
| CNTN6    | turquoise | 0.79854456 | 3.34E-42   | -0.5890696 | 1.15E-18   | -0.5175737 |
| CNTN3    | turquoise | 0.64236815 | 6.52E-23   | -0.5004965 | 4.03E-13   | -0.7426708 |
| CNTN1    | turquoise | 0.41276237 | 5.27E-09   | -0.1278226 | 0.08293381 | -0.8056749 |
| CNRIP1   | turquoise | 0.67790907 | 3.04E-26   | -0.6735874 | 8.17E-26   | -0.6293102 |
| CNPY4    | turquoise | -0.4310556 | 9.06E-10   | 0.53237122 | 6.24E-15   | 0.69825105 |
| CNOT9    | turquoise | 0.64261598 | 6.20E-23   | -0.3392815 | 2.31E-06   | -0.76239   |

|         |           |            |            |            |            |            |
|---------|-----------|------------|------------|------------|------------|------------|
| CNOT7   | turquoise | 0.60665644 | 5.58E-20   | -0.2017514 | 0.00588911 | -0.8046489 |
| CNNM3   | turquoise | -0.6063137 | 5.93E-20   | 0.38717789 | 5.20E-08   | 0.87219006 |
| CNN3    | turquoise | -0.356577  | 6.30E-07   | 0.68539163 | 5.26E-27   | 0.40597526 |
| CNKS3   | turquoise | -0.5114978 | 1.00E-13   | 0.68932806 | 2.04E-27   | 0.48729804 |
| CNIH3   | turquoise | 0.70193368 | 8.96E-29   | -0.6646837 | 5.96E-25   | -0.6150209 |
| CNGB1   | turquoise | -0.2242356 | 0.00215185 | 0.03202003 | 0.66524832 | 0.66357082 |
| CNBP    | turquoise | 0.18627347 | 0.01112717 | 0.20624801 | 0.00485334 | -0.7473939 |
| CMTM3   | turquoise | -0.5513712 | 4.18E-16   | 0.72927763 | 5.57E-32   | 0.62281071 |
| CMSS1   | turquoise | 0.7560006  | 1.62E-35   | -0.5889556 | 1.17E-18   | -0.5895033 |
| CMKLR1  | turquoise | -0.3596533 | 4.96E-07   | 0.61003589 | 3.06E-20   | 0.47117519 |
| CMC1    | turquoise | 0.47849001 | 5.63E-12   | -0.2687506 | 0.00021652 | -0.8417998 |
| CMAS    | turquoise | 0.68841031 | 2.55E-27   | -0.5663921 | 4.36E-17   | -0.8042513 |
| CLUL1   | turquoise | 0.65756697 | 2.78E-24   | -0.4664283 | 2.21E-11   | -0.5803283 |
| CLTC    | turquoise | 0.77266621 | 5.82E-38   | -0.3726831 | 1.75E-07   | -0.6203798 |
| CLTA    | turquoise | 0.41979172 | 2.71E-09   | -0.6697833 | 1.93E-25   | -0.6286609 |
| CLRN1   | turquoise | -0.5178998 | 4.37E-14   | 0.29138283 | 5.72E-05   | 0.77500866 |
| CLOCK   | turquoise | 0.71602243 | 2.23E-30   | -0.4858568 | 2.38E-12   | -0.5705361 |
| CLN8    | turquoise | -0.3437568 | 1.66E-06   | 0.36163145 | 4.25E-07   | 0.53716808 |
| CLIP4   | turquoise | 0.3385678  | 2.43E-06   | 0.06346199 | 0.39078679 | -0.7532889 |
| CLIP2   | turquoise | -0.683348  | 8.53E-27   | 0.20359778 | 0.00544201 | 0.39043098 |
| CLIP1   | turquoise | 0.5070505  | 1.77E-13   | -0.0963967 | 0.19179357 | -0.4772272 |
| CLINT1  | turquoise | 0.40807994 | 8.12E-09   | 0.05040399 | 0.49564692 | -0.7772626 |
| CLIC1   | turquoise | -0.5088936 | 1.40E-13   | 0.65598852 | 3.89E-24   | 0.28896892 |
| CLEC2D  | turquoise | 0.31067432 | 1.68E-05   | 0.01861649 | 0.80141422 | -0.3784495 |
| CLEC2B  | turquoise | -0.4591699 | 4.90E-11   | 0.67145299 | 1.32E-25   | 0.53012778 |
| CLEC14A | turquoise | -0.3710517 | 2.00E-07   | 0.70211094 | 8.56E-29   | 0.45087034 |
| CLDND2  | turquoise | -0.288838  | 6.68E-05   | 0.06143467 | 0.40612995 | 0.73718667 |
| CLDN5   | turquoise | -0.6761155 | 4.59E-26   | 0.53083005 | 7.71E-15   | 0.70479327 |
| CLDN15  | turquoise | -0.6003863 | 1.68E-19   | 0.50549043 | 2.16E-13   | 0.58126169 |
| CLCC1   | turquoise | -0.4408275 | 3.39E-10   | 0.72880277 | 6.38E-32   | 0.5052565  |
| CLASRP  | turquoise | -0.3989383 | 1.86E-08   | 0.04671645 | 0.52774597 | 0.45475526 |
| CLASP2  | turquoise | 0.38176189 | 8.24E-08   | -0.063309  | 0.39193215 | -0.857587  |
| CKAP5   | turquoise | 0.41223173 | 5.53E-09   | -0.3416283 | 1.94E-06   | -0.7262348 |
| CITED2  | turquoise | 0.65525267 | 4.55E-24   | -0.6001949 | 1.73E-19   | -0.7968353 |
| CISD1   | turquoise | 0.61601077 | 1.03E-20   | -0.8184994 | 6.41E-46   | -0.5957266 |
| CIRBP   | turquoise | 0.48202811 | 3.73E-12   | -0.6514006 | 1.02E-23   | -0.4233586 |
| CIDCP   | turquoise | 0.26435601 | 0.00027673 | 0.03937081 | 0.59467221 | -0.7812457 |
| CIC     | turquoise | -0.5624388 | 8.00E-17   | 0.12426002 | 0.09194975 | 0.1177346  |
| CIB2    | turquoise | -0.4872483 | 2.02E-12   | 0.25998794 | 0.00035169 | 0.75342878 |
| CHSY3   | turquoise | 0.65878422 | 2.14E-24   | -0.5891055 | 1.14E-18   | -0.4454203 |
| CHSY1   | turquoise | -0.3093371 | 1.83E-05   | 0.60853844 | 3.99E-20   | 0.46004409 |
| CHST6   | turquoise | -0.5262319 | 1.44E-14   | 0.45894735 | 5.02E-11   | 0.72841673 |
| CHST3   | turquoise | -0.7872073 | 2.85E-40   | 0.46274445 | 3.32E-11   | 0.46002353 |
| CHRN1   | turquoise | -0.4405022 | 3.50E-10   | 0.69207355 | 1.05E-27   | 0.55941066 |
| CHRM3   | turquoise | 0.62146766 | 3.77E-21   | -0.6811447 | 1.43E-26   | -0.5772493 |
| CHP1    | turquoise | 0.51661868 | 5.17E-14   | -0.419843  | 2.70E-09   | -0.8068214 |

|        |           |            |          |            |            |            |
|--------|-----------|------------|----------|------------|------------|------------|
| CHN1   | turquoise | 0.58551639 | 2.07E-18 | -0.6921366 | 1.03E-27   | -0.7380937 |
| CHMP5  | turquoise | 0.6573808  | 2.90E-24 | -0.288797  | 6.70E-05   | -0.6665429 |
| CHMP4B | turquoise | 0.3975934  | 2.10E-08 | -0.5944422 | 4.65E-19   | -0.5058146 |
| CHMP2B | turquoise | 0.54986762 | 5.21E-16 | -0.0636074 | 0.3896999  | -0.7212279 |
| CHMP1B | turquoise | 0.42170394 | 2.26E-09 | -0.1313141 | 0.07480118 | -0.8275466 |
| CHMP1A | turquoise | -0.64148   | 7.79E-23 | 0.12918474 | 0.07968027 | 0.49496371 |
| CHM    | turquoise | 0.72702975 | 1.06E-31 | -0.6408511 | 8.84E-23   | -0.4401072 |
| CHL1   | turquoise | 0.61099477 | 2.57E-20 | -0.414684  | 4.40E-09   | -0.8229532 |
| CHKB   | turquoise | -0.4868614 | 2.11E-12 | 0.04661496 | 0.52864404 | 0.55711952 |
| CHKA   | turquoise | -0.4623439 | 3.47E-11 | 0.28040547 | 0.00011067 | 0.50591205 |
| CHGB   | turquoise | 0.68806898 | 2.77E-27 | -0.690539  | 1.52E-27   | -0.8256797 |
| CHGA   | turquoise | 0.32785351 | 5.22E-06 | -0.5355995 | 3.99E-15   | -0.4574122 |
| CHDH   | turquoise | -0.5582659 | 1.50E-16 | 0.68415309 | 7.05E-27   | 0.63477186 |
| CHD8   | turquoise | -0.5560525 | 2.09E-16 | 0.14389696 | 0.05068624 | 0.75313451 |
| CHD7   | turquoise | -0.5905359 | 8.99E-19 | 0.67772146 | 3.17E-26   | 0.75751421 |
| CHCHD7 | turquoise | 0.47983152 | 4.82E-12 | -0.4986278 | 5.08E-13   | -0.3533534 |
| CHCHD6 | turquoise | 0.50709852 | 1.76E-13 | -0.7404104 | 2.12E-33   | -0.6769135 |
| CHCHD2 | turquoise | 0.50305435 | 2.93E-13 | -0.2762095 | 0.00014141 | -0.6107686 |
| CHADL  | turquoise | -0.3981748 | 1.99E-08 | 0.07751889 | 0.29426853 | 0.51098718 |
| CGNL1  | turquoise | -0.525804  | 1.53E-14 | 0.80397402 | 3.59E-43   | 0.68967931 |
| CGN    | turquoise | -0.355132  | 7.04E-07 | 0.28781682 | 7.11E-05   | 0.68943298 |
| CGGBP1 | turquoise | 0.44290988 | 2.74E-10 | 0.07539846 | 0.30771339 | -0.5965214 |
| CFI    | turquoise | -0.3371584 | 2.69E-06 | 0.62282291 | 2.92E-21   | 0.36750227 |
| CFH    | turquoise | -0.4267486 | 1.38E-09 | 0.54242371 | 1.53E-15   | 0.59689761 |
| CFDP1  | turquoise | 0.41402823 | 4.68E-09 | -0.3012361 | 3.09E-05   | -0.2928497 |
| CFB    | turquoise | -0.548584  | 6.29E-16 | 0.46020074 | 4.38E-11   | 0.4375913  |
| CFAP36 | turquoise | 0.63805272 | 1.55E-22 | -0.32907   | 4.80E-06   | -0.8274301 |
| CFAP20 | turquoise | 0.57801647 | 7.00E-18 | -0.5222989 | 2.44E-14   | -0.679838  |
| CETN2  | turquoise | 0.46569577 | 2.40E-11 | -0.2514029 | 0.00055669 | -0.3117702 |
| CERS6  | turquoise | 0.57046983 | 2.32E-17 | -0.7855487 | 5.34E-40   | -0.4719131 |
| CERS2  | turquoise | -0.5674413 | 3.71E-17 | 0.77847525 | 7.29E-39   | 0.44240342 |
| CERS1  | turquoise | -0.6754772 | 5.31E-26 | 0.51165778 | 9.84E-14   | 0.70285003 |
| CEPT1  | turquoise | 0.32001776 | 8.97E-06 | 0.26081834 | 0.00033613 | -0.4147666 |
| CEP68  | turquoise | 0.43333674 | 7.22E-10 | -0.3067322 | 2.17E-05   | -0.7194024 |
| CEP41  | turquoise | 0.70188923 | 9.06E-29 | -0.6219569 | 3.44E-21   | -0.7927172 |
| CEP295 | turquoise | -0.3554519 | 6.87E-07 | 0.1814312  | 0.01345278 | 0.90286894 |
| CEP104 | turquoise | -0.4937887 | 9.19E-13 | 0.32444072 | 6.62E-06   | 0.6180212  |
| CENPF  | turquoise | 0.59931911 | 2.02E-19 | -0.5759907 | 9.69E-18   | -0.3292348 |
| CELF2  | turquoise | 0.62678548 | 1.38E-21 | -0.53036   | 8.22E-15   | -0.7689404 |
| CEL    | turquoise | -0.4491422 | 1.43E-10 | 0.26893098 | 0.00021434 | 0.23268599 |
| CECR6  | turquoise | 0.47444169 | 8.96E-12 | -0.8185051 | 6.40E-46   | -0.4313059 |
| CECR1  | turquoise | -0.5002892 | 4.14E-13 | 0.42054379 | 2.52E-09   | 0.26897351 |
| CEBPD  | turquoise | -0.6274374 | 1.22E-21 | 0.58695833 | 1.63E-18   | 0.38071492 |
| CEBPB  | turquoise | -0.4646524 | 2.69E-11 | 0.59857492 | 2.29E-19   | 0.40448119 |
| CDYL2  | turquoise | 0.59085175 | 8.52E-19 | -0.46813   | 1.83E-11   | -0.5395141 |
| CDS2   | turquoise | 0.55237337 | 3.61E-16 | -0.4371324 | 4.93E-10   | -0.4490273 |

|          |           |            |            |            |            |            |
|----------|-----------|------------|------------|------------|------------|------------|
| CDR2L    | turquoise | -0.3781033 | 1.12E-07   | 0.26500471 | 0.00026696 | 0.75482732 |
| CDR2     | turquoise | 0.61907103 | 5.88E-21   | -0.6103856 | 2.87E-20   | -0.2390738 |
| CDO1     | turquoise | 0.65309041 | 7.18E-24   | -0.2788415 | 0.00012131 | -0.6471546 |
| CDKN1A   | turquoise | -0.5340838 | 4.92E-15   | 0.49129088 | 1.24E-12   | 0.41646563 |
| CDK6     | turquoise | -0.3284152 | 5.02E-06   | 0.41691839 | 3.56E-09   | 0.56348542 |
| CDK5RAP2 | turquoise | -0.4719106 | 1.19E-11   | 0.38086514 | 8.88E-08   | 0.76861281 |
| CDK5R1   | turquoise | 0.56495406 | 5.45E-17   | -0.7542114 | 2.89E-35   | -0.4971966 |
| CDK5     | turquoise | 0.38135444 | 8.53E-08   | -0.6610863 | 1.31E-24   | -0.6524683 |
| CDK4     | turquoise | -0.6454018 | 3.52E-23   | 0.52124817 | 2.81E-14   | 0.44939438 |
| CDK20    | turquoise | 0.52410808 | 1.92E-14   | -0.7748392 | 2.69E-38   | -0.3623421 |
| CDK2     | turquoise | -0.5431896 | 1.37E-15   | 0.69433056 | 6.03E-28   | 0.44534399 |
| CDK19    | turquoise | -0.4222383 | 2.14E-09   | 0.22982306 | 0.00164968 | 0.83475732 |
| CDK14    | turquoise | 0.61782403 | 7.41E-21   | -0.6552796 | 4.52E-24   | -0.7931256 |
| CDIP1    | turquoise | -0.6041656 | 8.66E-20   | 0.59496902 | 4.25E-19   | 0.67025289 |
| CDH8     | turquoise | 0.65158958 | 9.83E-24   | -0.757716  | 9.28E-36   | -0.5166395 |
| CDH23    | turquoise | -0.4620658 | 3.58E-11   | 0.21961989 | 0.00266748 | 0.58298375 |
| CDH22    | turquoise | 0.53624569 | 3.64E-15   | -0.7612777 | 2.87E-36   | -0.2560529 |
| CDH20    | turquoise | -0.5019002 | 3.39E-13   | 0.41822069 | 3.15E-09   | 0.74678751 |
| CDH13    | turquoise | 0.74729536 | 2.57E-34   | -0.6754449 | 5.35E-26   | -0.7387114 |
| CDH12    | turquoise | 0.69954503 | 1.64E-28   | -0.6883984 | 2.56E-27   | -0.618075  |
| CDH10    | turquoise | 0.58737458 | 1.52E-18   | -0.407183  | 8.82E-09   | -0.610006  |
| CDCA5    | turquoise | 0.61379574 | 1.55E-20   | -0.8006925 | 1.39E-42   | -0.3795536 |
| CDC7     | turquoise | 0.61498313 | 1.25E-20   | -0.526357  | 1.42E-14   | -0.3950851 |
| CDC42SE2 | turquoise | 0.78244087 | 1.70E-39   | -0.5815408 | 3.96E-18   | -0.4874038 |
| CDC40    | turquoise | 0.68038987 | 1.71E-26   | -0.5413904 | 1.77E-15   | -0.7592673 |
| CDC25B   | turquoise | -0.5315907 | 6.94E-15   | 0.0924763  | 0.21057973 | 0.3940381  |
| CDC123   | turquoise | 0.50680211 | 1.83E-13   | -0.2790712 | 0.00011969 | -0.7768345 |
| CD99     | turquoise | -0.5096719 | 1.27E-13   | 0.57597977 | 9.70E-18   | 0.16534525 |
| CD84     | turquoise | -0.2953056 | 4.49E-05   | 0.12181278 | 0.09858349 | 0.72419986 |
| CD83     | turquoise | 0.53035775 | 8.22E-15   | -0.6394172 | 1.18E-22   | -0.6597668 |
| CD82     | turquoise | -0.6185067 | 6.53E-21   | 0.40054312 | 1.61E-08   | 0.80123015 |
| CD79B    | turquoise | -0.5624291 | 8.01E-17   | 0.37827556 | 1.10E-07   | 0.73497987 |
| CD7      | turquoise | -0.3688679 | 2.39E-07   | 0.37916601 | 1.02E-07   | 0.7123132  |
| CD59     | turquoise | -0.229165  | 0.00170269 | 0.5956365  | 3.79E-19   | 0.17326105 |
| CD47     | turquoise | 0.67838094 | 2.72E-26   | -0.657834  | 2.63E-24   | -0.6494873 |
| CD44     | turquoise | -0.2340007 | 0.00134684 | 0.40319208 | 1.27E-08   | 0.12432887 |
| CD34     | turquoise | -0.3871233 | 5.22E-08   | 0.64119122 | 8.26E-23   | 0.41713241 |
| CD2BP2   | turquoise | 0.35847836 | 5.43E-07   | -0.4981734 | 5.38E-13   | -0.2804486 |
| CD24     | turquoise | 0.56548495 | 5.02E-17   | -0.4950941 | 7.84E-13   | -0.404103  |
| CD151    | turquoise | -0.6012815 | 1.43E-19   | 0.55941404 | 1.27E-16   | 0.86990637 |
| CD14     | turquoise | -0.3384998 | 2.44E-06   | 0.35994894 | 4.84E-07   | 0.17700451 |
| CCT6P1   | turquoise | 0.58277629 | 3.24E-18   | -0.2215169 | 0.00244334 | -0.7782778 |
| CCT2     | turquoise | 0.4623638  | 3.46E-11   | -0.127081  | 0.08474968 | -0.742243  |
| CCSER2   | turquoise | 0.5764396  | 9.02E-18   | -0.2269872 | 0.00188937 | -0.8359212 |
| CCS      | turquoise | -0.3347651 | 3.20E-06   | -0.0657169 | 0.37413817 | 0.7699382  |
| CCPG1    | turquoise | 0.50287496 | 3.00E-13   | -0.2838373 | 9.03E-05   | -0.3321094 |

|          |           |            |            |            |            |            |
|----------|-----------|------------|------------|------------|------------|------------|
| CCNY     | turquoise | -0.3146875 | 1.29E-05   | 0.02511175 | 0.73438733 | 0.69029089 |
| CCNT2    | turquoise | 0.56693974 | 4.01E-17   | -0.1584098 | 0.03127003 | -0.7481712 |
| CCNH     | turquoise | 0.73104715 | 3.35E-32   | -0.4213226 | 2.34E-09   | -0.5759959 |
| CCND2    | turquoise | 0.50667547 | 1.86E-13   | -0.2727358 | 0.0001727  | -0.5187365 |
| CCND1    | turquoise | -0.4646702 | 2.68E-11   | 0.34566933 | 1.44E-06   | 0.66593712 |
| CCNC     | turquoise | 0.56936241 | 2.75E-17   | -0.224207  | 0.00215475 | -0.8349435 |
| CCM2L    | turquoise | -0.5066976 | 1.85E-13   | 0.42412522 | 1.79E-09   | 0.65840737 |
| CCKBR    | turquoise | 0.53898543 | 2.48E-15   | -0.7633063 | 1.45E-36   | -0.7046292 |
| CCK      | turquoise | 0.58244791 | 3.42E-18   | -0.7343167 | 1.29E-32   | -0.5709431 |
| CCDC97   | turquoise | -0.4710624 | 1.31E-11   | 0.53946    | 2.32E-15   | 0.24832242 |
| CCDC85C  | turquoise | -0.3820311 | 8.05E-08   | 0.41173961 | 5.79E-09   | 0.80039913 |
| CCDC85A  | turquoise | 0.66112126 | 1.30E-24   | -0.6468409 | 2.62E-23   | -0.4305713 |
| CCDC6    | turquoise | 0.55574973 | 2.19E-16   | -0.6241427 | 2.28E-21   | -0.4369195 |
| CCDC34   | turquoise | -0.2146779 | 0.00334155 | -0.1354728 | 0.06597025 | 0.61058343 |
| CCDC190  | turquoise | -0.2515138 | 0.00055346 | 0.28603797 | 7.92E-05   | 0.68656578 |
| CCDC110  | turquoise | 0.68908465 | 2.17E-27   | -0.5120665 | 9.34E-14   | -0.6883043 |
| CCDC102A | turquoise | -0.4238768 | 1.83E-09   | 0.69742917 | 2.79E-28   | 0.71386627 |
| CCAR2    | turquoise | 0.3666299  | 2.86E-07   | -0.5934153 | 5.53E-19   | -0.4635179 |
| CBY1     | turquoise | -0.5708019 | 2.20E-17   | 0.26430419 | 0.00027752 | 0.65563606 |
| CBX7     | turquoise | 0.48570658 | 2.42E-12   | -0.4353297 | 5.92E-10   | -0.7213961 |
| CBX1     | turquoise | 0.2489476  | 0.00063301 | -0.2213188 | 0.00246592 | -0.4629448 |
| CBS      | turquoise | -0.5047013 | 2.39E-13   | 0.63679813 | 1.98E-22   | 0.63060348 |
| CBLN4    | turquoise | 0.69859656 | 2.08E-28   | -0.6470685 | 2.50E-23   | -0.7840121 |
| CBLN2    | turquoise | 0.63539775 | 2.61E-22   | -0.6562012 | 3.72E-24   | -0.6669409 |
| CAV1     | turquoise | -0.3381296 | 2.51E-06   | 0.72285511 | 3.41E-31   | 0.15237258 |
| CASZ1    | turquoise | -0.4441814 | 2.40E-10   | 0.60902996 | 3.66E-20   | 0.68573962 |
| CASD1    | turquoise | 0.62001062 | 4.94E-21   | -0.329065  | 4.80E-06   | -0.7277359 |
| CASC3    | turquoise | -0.6910874 | 1.33E-27   | 0.63259852 | 4.51E-22   | 0.27398696 |
| CASC15   | turquoise | 0.48813332 | 1.82E-12   | -0.7794537 | 5.11E-39   | -0.2738403 |
| CASC1    | turquoise | 0.69934991 | 1.72E-28   | -0.5960658 | 3.53E-19   | -0.4471667 |
| CARTPT   | turquoise | 0.50787479 | 1.60E-13   | -0.5305992 | 7.96E-15   | -0.4489618 |
| CARM1    | turquoise | -0.6838168 | 7.64E-27   | 0.12264028 | 0.09629924 | 0.62403083 |
| CARHSP1  | turquoise | -0.4856572 | 2.44E-12   | 0.45414011 | 8.43E-11   | 0.68560122 |
| CARD9    | turquoise | -0.3739776 | 1.57E-07   | 0.41853803 | 3.06E-09   | 0.59532511 |
| CARD8    | turquoise | -0.2534266 | 0.00050028 | 0.59725409 | 2.88E-19   | 0.55666922 |
| CAPRIN2  | turquoise | 0.52595519 | 1.50E-14   | -0.4770005 | 6.69E-12   | -0.7428293 |
| CAPRIN1  | turquoise | 0.62754789 | 1.19E-21   | -0.6805802 | 1.63E-26   | -0.5290681 |
| CAPG     | turquoise | -0.4353639 | 5.90E-10   | 0.37164874 | 1.90E-07   | 0.5193762  |
| CAP2     | turquoise | 0.67098582 | 1.47E-25   | -0.646055  | 3.08E-23   | -0.7128765 |
| CANX     | turquoise | 0.60089073 | 1.54E-19   | -0.4026766 | 1.33E-08   | -0.421855  |
| CAND1    | turquoise | 0.61271133 | 1.89E-20   | -0.2368778 | 0.00116883 | -0.7856209 |
| CAMTA1   | turquoise | 0.60673621 | 5.50E-20   | -0.7666861 | 4.63E-37   | -0.5027978 |
| CAMSAP1  | turquoise | 0.68088365 | 1.52E-26   | -0.501858  | 3.41E-13   | -0.5192267 |
| CAMLG    | turquoise | 0.53196334 | 6.60E-15   | -0.5205528 | 3.08E-14   | -0.2576049 |
| CAMKV    | turquoise | 0.48095918 | 4.23E-12   | -0.7898392 | 1.04E-40   | -0.2955845 |
| CAMK4    | turquoise | 0.67166889 | 1.26E-25   | -0.5546342 | 2.59E-16   | -0.7378651 |

|          |           |            |            |            |            |            |
|----------|-----------|------------|------------|------------|------------|------------|
| CAMK2G   | turquoise | 0.287487   | 7.25E-05   | -0.004243  | 0.95428997 | -0.6213796 |
| CAMK2D   | turquoise | 0.55069918 | 4.62E-16   | -0.6508686 | 1.14E-23   | -0.3444744 |
| CAMK2B   | turquoise | -0.2725908 | 0.00017414 | -0.2751134 | 0.00015066 | 0.40098329 |
| CAMK1D   | turquoise | 0.56912415 | 2.86E-17   | -0.5727008 | 1.63E-17   | -0.8286484 |
| CALY     | turquoise | 0.36017672 | 4.76E-07   | -0.8337039 | 4.50E-49   | -0.2404957 |
| CALML4   | turquoise | -0.4587286 | 5.14E-11   | 0.6414742  | 7.80E-23   | 0.49796784 |
| CALM3    | turquoise | 0.54053273 | 2.00E-15   | -0.7414459 | 1.55E-33   | -0.7152275 |
| CALM2    | turquoise | 0.57932634 | 5.67E-18   | -0.4082795 | 7.98E-09   | -0.8282771 |
| CALM1    | turquoise | 0.65528926 | 4.52E-24   | -0.6208469 | 4.23E-21   | -0.785614  |
| CALD1    | turquoise | -0.5591066 | 1.33E-16   | 0.39413209 | 2.84E-08   | 0.88619282 |
| CALB1    | turquoise | 0.81017177 | 2.58E-44   | -0.5214219 | 2.74E-14   | -0.5598131 |
| CADPS2   | turquoise | 0.59539956 | 3.95E-19   | -0.5553906 | 2.31E-16   | -0.5920764 |
| CADPS    | turquoise | 0.64445922 | 4.27E-23   | -0.6666471 | 3.87E-25   | -0.7901329 |
| CADM2    | turquoise | 0.41549173 | 4.08E-09   | -0.0735747 | 0.31959498 | -0.7431956 |
| CADM1    | turquoise | -0.2643489 | 0.00027684 | 0.39774401 | 2.07E-08   | 0.38001422 |
| CACNB4   | turquoise | 0.5062674  | 1.96E-13   | -0.5291507 | 9.70E-15   | -0.3831257 |
| CACNB2   | turquoise | 0.61118265 | 2.49E-20   | -0.8166012 | 1.51E-45   | -0.5162084 |
| CACNB1   | turquoise | 0.38922927 | 4.36E-08   | -0.8331517 | 5.94E-49   | -0.2219897 |
| CACNA2D3 | turquoise | 0.68145179 | 1.33E-26   | -0.7120868 | 6.39E-30   | -0.5404844 |
| CACNA1I  | turquoise | -0.3238818 | 6.88E-06   | 0.03593323 | 0.62725856 | 0.67412711 |
| CACNA1G  | turquoise | 0.51391206 | 7.35E-14   | -0.4488604 | 1.47E-10   | -0.3289558 |
| CACFD1   | turquoise | -0.4459071 | 2.01E-10   | 0.25618918 | 0.00043178 | 0.75570454 |
| CABYR    | turquoise | 0.69534327 | 4.69E-28   | -0.8118597 | 1.24E-44   | -0.4821724 |
| CAB39L   | turquoise | -0.3767278 | 1.25E-07   | 0.47839435 | 5.69E-12   | 0.52464481 |
| CAB39    | turquoise | 0.58747814 | 1.50E-18   | -0.2702534 | 0.00019891 | -0.802146  |
| CA10     | turquoise | 0.5928433  | 6.09E-19   | -0.7632063 | 1.50E-36   | -0.4449128 |
| C9orf72  | turquoise | 0.7423636  | 1.17E-33   | -0.3672359 | 2.72E-07   | -0.5515455 |
| C9orf40  | turquoise | 0.53697869 | 3.29E-15   | -0.386601  | 5.46E-08   | -0.458705  |
| C8orf82  | turquoise | -0.5704092 | 2.34E-17   | 0.29434693 | 4.76E-05   | 0.62195012 |
| C8orf59  | turquoise | 0.52396062 | 1.96E-14   | 0.02754419 | 0.70976418 | -0.4084145 |
| C8orf46  | turquoise | 0.5674501  | 3.71E-17   | -0.3525284 | 8.60E-07   | -0.7807682 |
| C6orf120 | turquoise | 0.74074203 | 1.92E-33   | -0.3029442 | 2.77E-05   | -0.7408304 |
| C5orf42  | turquoise | 0.70762441 | 2.07E-29   | -0.29667   | 4.12E-05   | -0.6133701 |
| C5orf34  | turquoise | 0.66694936 | 3.62E-25   | -0.5426896 | 1.47E-15   | -0.6280059 |
| C5orf24  | turquoise | 0.28792044 | 7.07E-05   | -0.0889851 | 0.22839005 | -0.7342976 |
| C5       | turquoise | -0.4429709 | 2.72E-10   | 0.36028649 | 4.72E-07   | 0.67371123 |
| C4orf33  | turquoise | 0.62013968 | 4.83E-21   | -0.431274  | 8.87E-10   | -0.4983983 |
| C3orf14  | turquoise | 0.65918341 | 1.97E-24   | -0.4309695 | 9.14E-10   | -0.8041794 |
| C2orf82  | turquoise | -0.3242802 | 6.70E-06   | 0.05410984 | 0.46446084 | 0.55218323 |
| C2orf80  | turquoise | 0.72218286 | 4.12E-31   | -0.6740889 | 7.29E-26   | -0.6849296 |
| C2orf47  | turquoise | 0.61717895 | 8.35E-21   | -0.2264775 | 0.00193567 | -0.7521119 |
| C21orf2  | turquoise | -0.5441108 | 1.20E-15   | 0.14763424 | 0.04491653 | 0.83130108 |
| C20orf24 | turquoise | 0.27505604 | 0.00015116 | 0.09290193 | 0.20847846 | -0.7377038 |
| C1QTNF5  | turquoise | -0.5226759 | 2.32E-14   | 0.38391383 | 6.87E-08   | 0.36026514 |
| C1QTNF1  | turquoise | -0.6233463 | 2.65E-21   | 0.59079651 | 8.60E-19   | 0.61901294 |
| C1QL3    | turquoise | 0.63210463 | 4.97E-22   | -0.691169  | 1.31E-27   | -0.4584158 |

|           |           |            |          |            |            |            |
|-----------|-----------|------------|----------|------------|------------|------------|
| C1QBP     | turquoise | 0.38095817 | 8.82E-08 | -0.1249019 | 0.09026994 | -0.8722767 |
| C1orf64   | turquoise | -0.5706616 | 2.25E-17 | 0.64321034 | 5.50E-23   | 0.1704919  |
| C1orf53   | turquoise | 0.41863183 | 3.03E-09 | -0.1410175 | 0.05554044 | -0.6675029 |
| C1orf52   | turquoise | 0.51619993 | 5.46E-14 | -0.3264566 | 5.76E-06   | -0.551164  |
| C1orf216  | turquoise | 0.34128642 | 1.99E-06 | -0.753298  | 3.87E-35   | -0.3807573 |
| C1orf198  | turquoise | -0.7624512 | 1.94E-36 | 0.61193036 | 2.17E-20   | 0.41325192 |
| C1orf162  | turquoise | -0.5134621 | 7.80E-14 | 0.63247203 | 4.62E-22   | 0.50844685 |
| C1orf109  | turquoise | 0.54596694 | 9.18E-16 | -0.3060246 | 2.27E-05   | -0.7107494 |
| C19orf54  | turquoise | -0.5858045 | 1.97E-18 | 0.40508339 | 1.07E-08   | 0.72621864 |
| C19orf25  | turquoise | -0.6610321 | 1.32E-24 | 0.44438598 | 2.35E-10   | 0.61935708 |
| C18orf32  | turquoise | 0.3955378  | 2.51E-08 | 0.05193031 | 0.48266976 | -0.2216737 |
| C17orf97  | turquoise | 0.4967411  | 6.41E-13 | -0.6705405 | 1.63E-25   | -0.2017165 |
| C17orf58  | turquoise | 0.33309571 | 3.61E-06 | -0.4337451 | 6.94E-10   | -0.2447866 |
| C17orf100 | turquoise | 0.5895761  | 1.06E-18 | -0.5570547 | 1.80E-16   | -0.563182  |
| C16orf58  | turquoise | 0.44335009 | 2.62E-10 | -0.6035983 | 9.57E-20   | -0.0435875 |
| C15orf52  | turquoise | -0.5490994 | 5.83E-16 | 0.56220799 | 8.29E-17   | 0.84423989 |
| C14orf93  | turquoise | -0.6152672 | 1.18E-20 | 0.47863731 | 5.54E-12   | 0.75695963 |
| C14orf2   | turquoise | 0.51086794 | 1.09E-13 | -0.610753  | 2.69E-20   | -0.7841352 |
| C12orf76  | turquoise | 0.53997268 | 2.16E-15 | -0.5216409 | 2.67E-14   | -0.7183415 |
| C12orf43  | turquoise | 0.53381652 | 5.11E-15 | -0.4580173 | 5.56E-11   | -0.6655183 |
| C12orf4   | turquoise | 0.59064336 | 8.83E-19 | -0.3705416 | 2.08E-07   | -0.79357   |
| C12orf29  | turquoise | 0.32865123 | 4.94E-06 | 0.1731204  | 0.01844538 | -0.4272914 |
| C11orf96  | turquoise | -0.4473755 | 1.72E-10 | 0.38598867 | 5.76E-08   | 0.25227861 |
| C11orf87  | turquoise | 0.69763837 | 2.65E-28 | -0.7983081 | 3.68E-42   | -0.4904551 |
| C11orf74  | turquoise | 0.51244756 | 8.89E-14 | -0.3556954 | 6.74E-07   | -0.548716  |
| C10orf88  | turquoise | 0.76409812 | 1.11E-36 | -0.57686   | 8.43E-18   | -0.4376662 |
| C10orf54  | turquoise | -0.5149978 | 6.39E-14 | 0.73330835 | 1.74E-32   | 0.58204228 |
| C10orf35  | turquoise | 0.58024386 | 4.89E-18 | -0.8613314 | 1.03E-55   | -0.1820947 |
| C10orf10  | turquoise | -0.5846882 | 2.37E-18 | 0.4726668  | 1.10E-11   | 0.34301859 |
| BZW2      | turquoise | 0.73836142 | 3.91E-33 | -0.7271195 | 1.03E-31   | -0.6493512 |
| BTN3A1    | turquoise | -0.3910315 | 3.73E-08 | 0.49085037 | 1.31E-12   | 0.67054793 |
| BTN2A1    | turquoise | 0.50634628 | 1.94E-13 | 0.02256345 | 0.7604767  | -0.6196761 |
| BTF3L4    | turquoise | 0.56671737 | 4.15E-17 | -0.2372077 | 0.00114986 | -0.8263676 |
| BTBD3     | turquoise | 0.69555015 | 4.46E-28 | -0.6422478 | 6.68E-23   | -0.6654113 |
| BTBD2     | turquoise | -0.4636042 | 3.02E-11 | 0.16228865 | 0.02731021 | 0.76561808 |
| BTBD10    | turquoise | 0.67907532 | 2.32E-26 | -0.5242626 | 1.88E-14   | -0.8412058 |
| BTBD1     | turquoise | 0.40608511 | 9.75E-09 | 0.05793966 | 0.43340305 | -0.7332481 |
| BSN       | turquoise | 0.44974984 | 1.34E-10 | -0.6638422 | 7.17E-25   | -0.3334811 |
| BSDC1     | turquoise | -0.5179669 | 4.33E-14 | 0.11504966 | 0.11889679 | 0.73606585 |
| BSCL2     | turquoise | 0.37118598 | 1.98E-07 | -0.8392598 | 2.63E-50   | -0.2939301 |
| BRWD1     | turquoise | 0.68294936 | 9.37E-27 | -0.7895549 | 1.16E-40   | -0.587467  |
| BRSK1     | turquoise | -0.5190638 | 3.75E-14 | 0.01623027 | 0.82643684 | 0.55798709 |
| BRINP1    | turquoise | 0.60885585 | 3.77E-20 | -0.604276  | 8.50E-20   | -0.5779337 |
| BRF2      | turquoise | 0.37860991 | 1.07E-07 | -0.5835004 | 2.88E-18   | -0.7491986 |
| BRE       | turquoise | 0.42295045 | 2.00E-09 | -0.7704053 | 1.28E-37   | -0.661616  |
| BRAF      | turquoise | 0.72151667 | 4.95E-31 | -0.4830517 | 3.31E-12   | -0.7330913 |



|         |           |            |            |            |            |            |
|---------|-----------|------------|------------|------------|------------|------------|
| BPTF    | turquoise | -0.4482171 | 1.58E-10   | 0.40356126 | 1.23E-08   | 0.38518264 |
| BPGM    | turquoise | 0.56288923 | 7.47E-17   | -0.0805013 | 0.27602896 | -0.7250383 |
| BORCS7  | turquoise | 0.56240947 | 8.04E-17   | -0.145485  | 0.0481634  | -0.8021544 |
| BOLA3   | turquoise | 0.23714911 | 0.00115321 | -0.0685985 | 0.35350607 | -0.7727416 |
| BOLA2   | turquoise | -0.6295845 | 8.08E-22   | 0.34578365 | 1.43E-06   | 0.70084879 |
| BOC     | turquoise | -0.4675548 | 1.95E-11   | 0.67767168 | 3.21E-26   | 0.62307629 |
| BNIP3L  | turquoise | 0.68475522 | 6.11E-27   | -0.3078715 | 2.02E-05   | -0.2868981 |
| BNIP3   | turquoise | 0.57476061 | 1.18E-17   | -0.3709697 | 2.01E-07   | -0.729871  |
| BMPR2   | turquoise | 0.6689647  | 2.31E-25   | -0.3476376 | 1.24E-06   | -0.7530005 |
| BMPER   | turquoise | 0.68699394 | 3.59E-27   | -0.5253101 | 1.63E-14   | -0.820602  |
| BMP1    | turquoise | -0.5966419 | 3.19E-19   | 0.54682086 | 8.12E-16   | 0.35784752 |
| BLVRA   | turquoise | 0.62008947 | 4.87E-21   | -0.5297565 | 8.93E-15   | -0.2096849 |
| BIVM    | turquoise | 0.54305136 | 1.39E-15   | -0.2505054 | 0.00058354 | -0.5313999 |
| BIN1    | turquoise | -0.4904532 | 1.38E-12   | -0.0051379 | 0.94466357 | 0.15331764 |
| BHLHE40 | turquoise | 0.12409159 | 0.09239463 | -0.0491405 | 0.50652735 | -0.434907  |
| BHLHE22 | turquoise | 0.60032284 | 1.69E-19   | -0.6638604 | 7.14E-25   | -0.4986766 |
| BHLHB9  | turquoise | 0.72731992 | 9.73E-32   | -0.523753  | 2.01E-14   | -0.7142413 |
| BGN     | turquoise | -0.6383083 | 1.47E-22   | 0.66998165 | 1.84E-25   | 0.73568494 |
| BEX5    | turquoise | 0.68979457 | 1.83E-27   | -0.6984433 | 2.17E-28   | -0.807267  |
| BEX4    | turquoise | 0.58253909 | 3.37E-18   | -0.4284334 | 1.17E-09   | -0.950231  |
| BEX2    | turquoise | 0.68911649 | 2.15E-27   | -0.7301429 | 4.34E-32   | -0.7714615 |
| BEX1    | turquoise | 0.67986007 | 1.93E-26   | -0.7394967 | 2.79E-33   | -0.7461477 |
| BEND7   | turquoise | -0.3161062 | 1.17E-05   | 0.72640225 | 1.26E-31   | 0.58667721 |
| BEND6   | turquoise | 0.60915302 | 3.58E-20   | -0.4784029 | 5.69E-12   | -0.7518582 |
| BECN1   | turquoise | 0.4881079  | 1.82E-12   | -0.3327207 | 3.70E-06   | -0.7482358 |
| BDNF    | turquoise | 0.61640617 | 9.62E-21   | -0.651118  | 1.08E-23   | -0.539433  |
| BCLAF1  | turquoise | 0.54605751 | 9.06E-16   | -0.2746161 | 0.00015504 | -0.7275824 |
| BCL6B   | turquoise | -0.4527575 | 9.77E-11   | 0.54799524 | 6.85E-16   | 0.71994548 |
| BCL6    | turquoise | -0.5692631 | 2.80E-17   | 0.65035313 | 1.27E-23   | 0.65206137 |
| BCL3    | turquoise | -0.589204  | 1.12E-18   | 0.38878345 | 4.53E-08   | 0.21544771 |
| BCL2    | turquoise | -0.4493974 | 1.39E-10   | 0.76216488 | 2.13E-36   | 0.60946171 |
| BCL11B  | turquoise | 0.6176992  | 7.58E-21   | -0.638241  | 1.49E-22   | -0.2994374 |
| BCCIP   | turquoise | 0.75974438 | 4.76E-36   | -0.5037904 | 2.67E-13   | -0.5020328 |
| BCAT2   | turquoise | -0.6880311 | 2.80E-27   | 0.59459002 | 4.53E-19   | 0.4899981  |
| BCAT1   | turquoise | 0.71329201 | 4.63E-30   | -0.4066558 | 9.26E-09   | -0.7297135 |
| BCAS2   | turquoise | 0.79074168 | 7.34E-41   | -0.3557137 | 6.73E-07   | -0.5197623 |
| BCAS1   | turquoise | -0.6051077 | 7.34E-20   | 0.4320425  | 8.22E-10   | 0.4483266  |
| BCAN    | turquoise | -0.6970012 | 3.11E-28   | 0.54314989 | 1.38E-15   | 0.46977742 |
| BBX     | turquoise | -0.5393582 | 2.36E-15   | 0.70876501 | 1.53E-29   | 0.33774653 |
| BBS7    | turquoise | 0.58149375 | 3.99E-18   | -0.6926329 | 9.15E-28   | -0.3849221 |
| BBS4    | turquoise | -0.3099855 | 1.76E-05   | 0.0810769  | 0.27259859 | 0.79848183 |
| BBS10   | turquoise | 0.49940179 | 4.62E-13   | 0.11629163 | 0.11494065 | -0.5682752 |
| BBC3    | turquoise | -0.5331109 | 5.63E-15   | 0.32110404 | 8.33E-06   | 0.78596762 |
| BAZ2B   | turquoise | -0.5794148 | 5.59E-18   | 0.70936733 | 1.31E-29   | 0.67699844 |
| BAZ1A   | turquoise | -0.5292907 | 9.51E-15   | 0.80352572 | 4.33E-43   | 0.54155241 |
| BASP1   | turquoise | 0.5933376  | 5.61E-19   | -0.7206325 | 6.32E-31   | -0.7144879 |

|          |           |            |          |            |            |            |
|----------|-----------|------------|----------|------------|------------|------------|
| BARD1    | turquoise | -0.4500372 | 1.30E-10 | 0.3795168  | 9.95E-08   | 0.63491093 |
| BAP1     | turquoise | -0.4973052 | 5.98E-13 | 0.20327467 | 0.00551798 | 0.64243457 |
| BANP     | turquoise | -0.5195515 | 3.52E-14 | 0.36247326 | 3.97E-07   | 0.64107445 |
| BAIAP2   | turquoise | 0.34067231 | 2.09E-06 | -0.7306898 | 3.71E-32   | -0.4730046 |
| BAGE5    | turquoise | -0.3897918 | 4.15E-08 | 0.39990778 | 1.70E-08   | 0.57951494 |
| BAG5     | turquoise | 0.55985667 | 1.18E-16 | -0.7975038 | 5.09E-42   | -0.2705827 |
| BAG3     | turquoise | -0.460151  | 4.41E-11 | 0.69035348 | 1.59E-27   | 0.29090323 |
| BACE2    | turquoise | -0.4548424 | 7.82E-11 | 0.41401575 | 4.68E-09   | 0.61228653 |
| B4GAT1   | turquoise | 0.52306598 | 2.20E-14 | -0.8245226 | 3.93E-47   | -0.3966061 |
| B4GALT6  | turquoise | 0.77077649 | 1.13E-37 | -0.585792  | 1.98E-18   | -0.697522  |
| B4GALT5  | turquoise | 0.65172969 | 9.54E-24 | -0.5710609 | 2.11E-17   | -0.7097475 |
| B3GALT2  | turquoise | 0.61996422 | 4.99E-21 | -0.4095184 | 7.12E-09   | -0.341548  |
| B3GALNT1 | turquoise | 0.71178175 | 6.93E-30 | -0.6684965 | 2.57E-25   | -0.5688066 |
| AZIN1    | turquoise | 0.62058132 | 4.45E-21 | -0.2651084 | 0.00026543 | -0.8378518 |
| AZGP1    | turquoise | -0.4745052 | 8.90E-12 | 0.49855846 | 5.13E-13   | 0.38739305 |
| AUP1     | turquoise | -0.5577562 | 1.62E-16 | 0.3445199  | 1.57E-06   | 0.78151772 |
| AUNIP    | turquoise | 0.65392953 | 6.02E-24 | -0.7187194 | 1.07E-30   | -0.2552014 |
| AUH      | turquoise | 0.66408035 | 6.81E-25 | -0.4671479 | 2.04E-11   | -0.8470057 |
| ATXN7L2  | turquoise | -0.3977103 | 2.07E-08 | -0.1548162 | 0.03536464 | 0.48214123 |
| ATXN3    | turquoise | -0.3584932 | 5.43E-07 | 0.05989472 | 0.4180195  | 0.85577408 |
| ATXN1L   | turquoise | -0.4765863 | 7.01E-12 | 0.67628458 | 4.42E-26   | 0.53400379 |
| ATRNL1   | turquoise | 0.65193782 | 9.14E-24 | -0.5729494 | 1.57E-17   | -0.7442997 |
| ATRNL    | turquoise | 0.61039163 | 2.87E-20 | -0.5361821 | 3.68E-15   | -0.8824851 |
| ATPIF1   | turquoise | 0.58239785 | 3.45E-18 | -0.76489   | 8.53E-37   | -0.3062434 |
| ATPAF1   | turquoise | 0.51969883 | 3.45E-14 | -0.7498339 | 1.16E-34   | -0.2326665 |
| ATP9A    | turquoise | 0.63804362 | 1.55E-22 | -0.7677953 | 3.17E-37   | -0.4011382 |
| ATP6V1H  | turquoise | 0.65913679 | 1.99E-24 | -0.5419183 | 1.64E-15   | -0.8217522 |
| ATP6V1G2 | turquoise | 0.57875427 | 6.22E-18 | -0.6223028 | 3.22E-21   | -0.8801181 |
| ATP6V1E1 | turquoise | 0.61583631 | 1.07E-20 | -0.8447819 | 1.40E-51   | -0.5466229 |
| ATP6V1D  | turquoise | 0.69034139 | 1.60E-27 | -0.6831863 | 8.86E-27   | -0.7542266 |
| ATP6V1C1 | turquoise | 0.59002297 | 9.79E-19 | -0.7136815 | 4.18E-30   | -0.5477596 |
| ATP6V1B2 | turquoise | 0.64564989 | 3.35E-23 | -0.808132  | 6.20E-44   | -0.6710534 |
| ATP6V0E2 | turquoise | 0.30130029 | 3.08E-05 | -0.5414943 | 1.74E-15   | 0.02457758 |
| ATP6V0E1 | turquoise | -0.5492685 | 5.69E-16 | 0.83819188 | 4.58E-50   | 0.59334    |
| ATP6AP2  | turquoise | 0.59611298 | 3.50E-19 | -0.3529954 | 8.30E-07   | -0.9079882 |
| ATP5O    | turquoise | 0.39522767 | 2.58E-08 | -0.1379441 | 0.0611393  | -0.9093902 |
| ATP5L    | turquoise | 0.66192066 | 1.09E-24 | -0.4853974 | 2.51E-12   | -0.7605681 |
| ATP5J    | turquoise | 0.35134716 | 9.41E-07 | -0.0029219 | 0.9685133  | -0.8062177 |
| ATP5G3   | turquoise | 0.58713592 | 1.58E-18 | -0.1712838 | 0.01974409 | -0.6988447 |
| ATP5F1   | turquoise | 0.41888991 | 2.96E-09 | -0.058187  | 0.4314393  | -0.8672114 |
| ATP5B    | turquoise | 0.59351085 | 5.44E-19 | -0.4775745 | 6.26E-12   | -0.8561095 |
| ATP5A1   | turquoise | 0.49429447 | 8.64E-13 | -0.2324792 | 0.00145068 | -0.9146974 |
| ATP2C1   | turquoise | 0.73915654 | 3.08E-33 | -0.5289988 | 9.90E-15   | -0.5807343 |
| ATP2B3   | turquoise | 0.66448174 | 6.23E-25 | -0.6699853 | 1.84E-25   | -0.8186206 |
| ATP2B2   | turquoise | 0.58254041 | 3.37E-18 | -0.7331232 | 1.83E-32   | -0.5915228 |
| ATP2B1   | turquoise | 0.66782282 | 2.98E-25 | -0.6588117 | 2.13E-24   | -0.2914731 |

|         |           |            |            |            |            |            |
|---------|-----------|------------|------------|------------|------------|------------|
| ATP2A2  | turquoise | 0.6078595  | 4.51E-20   | -0.4822455 | 3.64E-12   | -0.8875522 |
| ATP1B1  | turquoise | 0.62595163 | 1.62E-21   | -0.7256099 | 1.58E-31   | -0.694367  |
| ATP1A1  | turquoise | 0.5382712  | 2.74E-15   | -0.6719684 | 1.18E-25   | -0.8309804 |
| ATP10A  | turquoise | -0.4502062 | 1.28E-10   | 0.58637422 | 1.80E-18   | 0.69185459 |
| ATMIN   | turquoise | 0.41476201 | 4.37E-09   | 0.003618   | 0.96101751 | -0.7758079 |
| ATL1    | turquoise | 0.39180042 | 3.49E-08   | -0.6388453 | 1.32E-22   | -0.2314511 |
| ATG2A   | turquoise | -0.3583839 | 5.47E-07   | -0.1008879 | 0.17180971 | 0.50361143 |
| ATG16L2 | turquoise | -0.4534604 | 9.06E-11   | 0.17796875 | 0.01536711 | 0.78739311 |
| ATG101  | turquoise | -0.3044571 | 2.51E-05   | -0.1440024 | 0.05051541 | 0.5434978  |
| ATCAY   | turquoise | 0.4206829  | 2.49E-09   | -0.5207794 | 2.99E-14   | -0.6848793 |
| ATAD1   | turquoise | 0.71768554 | 1.42E-30   | -0.2259523 | 0.00198447 | -0.5695419 |
| ASTN2   | turquoise | -0.3951873 | 2.59E-08   | 0.03931129 | 0.5952298  | 0.69196311 |
| ASTN1   | turquoise | 0.43442983 | 6.48E-10   | -0.2727548 | 0.00017252 | -0.8281327 |
| ASRGL1  | turquoise | -0.440997  | 3.33E-10   | 0.64060363 | 9.29E-23   | 0.40186442 |
| ASPSCR1 | turquoise | -0.5291973 | 9.63E-15   | 0.16275356 | 0.02686573 | 0.87536724 |
| ASPHD2  | turquoise | 0.42354183 | 1.89E-09   | -0.7013379 | 1.04E-28   | -0.2660943 |
| ASPH    | turquoise | 0.67807172 | 2.93E-26   | -0.3656333 | 3.09E-07   | -0.5745222 |
| ASNSD1  | turquoise | 0.44791262 | 1.63E-10   | -0.0889979 | 0.22832303 | -0.8121031 |
| ASNS    | turquoise | 0.53783643 | 2.92E-15   | -0.6857031 | 4.88E-27   | -0.5784323 |
| ASL     | turquoise | -0.3600936 | 4.79E-07   | 0.12952901 | 0.07887448 | 0.72847102 |
| ASIC2   | turquoise | 0.39584472 | 2.45E-08   | -0.8263983 | 1.61E-47   | -0.2454979 |
| ASH2L   | turquoise | 0.59054001 | 8.98E-19   | -0.5725511 | 1.67E-17   | -0.6919859 |
| ASCL1   | turquoise | -0.4198289 | 2.70E-09   | 0.79218921 | 4.18E-41   | 0.52990258 |
| ASB6    | turquoise | -0.679703  | 2.00E-26   | 0.40681709 | 9.12E-09   | 0.66062701 |
| ARV1    | turquoise | 0.55370912 | 2.97E-16   | -0.1993511 | 0.00651928 | -0.7430084 |
| ARSK    | turquoise | 0.63944606 | 1.17E-22   | -0.3594869 | 5.02E-07   | -0.6519971 |
| ARSA    | turquoise | -0.2832511 | 9.35E-05   | 0.14905127 | 0.04287753 | 0.80033075 |
| ARRDC4  | turquoise | -0.3130533 | 1.43E-05   | 0.50840257 | 1.49E-13   | 0.46517858 |
| ARRDC2  | turquoise | -0.5594968 | 1.25E-16   | 0.42440698 | 1.74E-09   | 0.78373703 |
| ARPC5L  | turquoise | 0.58069961 | 4.54E-18   | -0.7994865 | 2.28E-42   | -0.280629  |
| ARPC1A  | turquoise | 0.43102799 | 9.09E-10   | -0.3109908 | 1.64E-05   | -0.7361894 |
| ARMCX5  | turquoise | 0.71996737 | 7.59E-31   | -0.5580817 | 1.55E-16   | -0.7538324 |
| ARMCX3  | turquoise | 0.47635385 | 7.20E-12   | -0.0817691 | 0.26851204 | -0.7934529 |
| ARMCX1  | turquoise | 0.46329684 | 3.12E-11   | -0.0850469 | 0.24972871 | -0.8849536 |
| ARMC8   | turquoise | 0.61604061 | 1.03E-20   | -0.3240533 | 6.80E-06   | -0.7824934 |
| ARMC10  | turquoise | 0.5086449  | 1.45E-13   | -0.283213  | 9.37E-05   | -0.9151589 |
| ARL6IP5 | turquoise | 0.6762624  | 4.44E-26   | -0.4300479 | 1.00E-09   | -0.4837418 |
| ARL6IP1 | turquoise | 0.57755643 | 7.54E-18   | -0.3958879 | 2.44E-08   | -0.8366311 |
| ARL6    | turquoise | 0.78103933 | 2.86E-39   | -0.5079973 | 1.57E-13   | -0.6544011 |
| ARL5A   | turquoise | -0.2646637 | 0.00027205 | 0.21581399 | 0.00317424 | 0.68487007 |
| ARL4A   | turquoise | 0.62942374 | 8.34E-22   | -0.621618  | 3.66E-21   | -0.3522547 |
| ARL3    | turquoise | 0.34303312 | 1.75E-06   | -0.5265826 | 1.37E-14   | -0.6110421 |
| ARL2BP  | turquoise | 0.58134696 | 4.09E-18   | -0.3727991 | 1.73E-07   | -0.6960129 |
| ARL1    | turquoise | 0.66356355 | 7.62E-25   | -0.4351929 | 6.00E-10   | -0.8299761 |
| ARID3B  | turquoise | -0.5222129 | 2.47E-14   | 0.18395309 | 0.01219326 | 0.80575408 |
| ARHGEF3 | turquoise | 0.62535332 | 1.81E-21   | -0.7363855 | 7.04E-33   | -0.5673836 |

|           |           |            |            |            |            |            |
|-----------|-----------|------------|------------|------------|------------|------------|
| ARHGEF10L | turquoise | -0.3628486 | 3.86E-07   | 0.15594634 | 0.0340306  | 0.68583797 |
| ARHGEF10  | turquoise | -0.6027028 | 1.12E-19   | 0.8355112  | 1.81E-49   | 0.53058687 |
| ARHGDI8   | turquoise | -0.2872124 | 7.37E-05   | 0.66133404 | 1.24E-24   | 0.38036923 |
| ARHGAP9   | turquoise | -0.3961071 | 2.39E-08   | 0.55506388 | 2.43E-16   | 0.37528644 |
| ARHGAP44  | turquoise | 0.49879231 | 4.98E-13   | -0.5594808 | 1.25E-16   | -0.3532181 |
| ARHGAP4   | turquoise | -0.4432526 | 2.64E-10   | 0.29471156 | 4.66E-05   | 0.69125024 |
| ARHGAP33  | turquoise | -0.5352288 | 4.20E-15   | 0.1811117  | 0.01362022 | 0.5391878  |
| ARHGAP32  | turquoise | 0.53517612 | 4.23E-15   | -0.5565206 | 1.95E-16   | -0.8584647 |
| ARHGAP31  | turquoise | -0.4823666 | 3.59E-12   | 0.76881378 | 2.23E-37   | 0.16157623 |
| ARHGAP30  | turquoise | -0.5333675 | 5.44E-15   | 0.63119038 | 5.93E-22   | 0.37236244 |
| ARHGAP22  | turquoise | -0.4504443 | 1.25E-10   | 0.2936154  | 4.99E-05   | 0.71409943 |
| ARHGAP20  | turquoise | 0.68408085 | 7.17E-27   | -0.5206736 | 3.03E-14   | -0.8240614 |
| ARHGAP19  | turquoise | -0.3867219 | 5.41E-08   | 0.55082511 | 4.53E-16   | 0.58874319 |
| ARHGAP10  | turquoise | -0.3709804 | 2.01E-07   | 0.23559911 | 0.0012451  | 0.75356727 |
| ARGLU1    | turquoise | 0.28010552 | 0.00011264 | 0.19122097 | 0.00912426 | -0.5950274 |
| ARFGF3    | turquoise | 0.59341154 | 5.54E-19   | -0.5131671 | 8.10E-14   | -0.4693401 |
| ARF1      | turquoise | 0.40409045 | 1.17E-08   | -0.7044565 | 4.70E-29   | -0.5323797 |
| ARAP1     | turquoise | -0.5832743 | 2.99E-18   | 0.40837213 | 7.91E-09   | 0.70014978 |
| AQP11     | turquoise | 0.66942885 | 2.09E-25   | -0.3482319 | 1.19E-06   | -0.4943108 |
| APRT      | turquoise | -0.4920531 | 1.13E-12   | 0.21186818 | 0.00379005 | 0.63092198 |
| APPBP2    | turquoise | 0.64118021 | 8.28E-23   | -0.3020705 | 2.93E-05   | -0.6145727 |
| APP       | turquoise | 0.43530436 | 5.93E-10   | -0.3873417 | 5.13E-08   | -0.8936522 |
| APOO      | turquoise | 0.50871755 | 1.43E-13   | -0.3629572 | 3.82E-07   | -0.8899172 |
| APOLD1    | turquoise | -0.456651  | 6.44E-11   | 0.66620792 | 4.26E-25   | 0.21687397 |
| APOL3     | turquoise | -0.6079025 | 4.47E-20   | 0.59578004 | 3.70E-19   | 0.45151075 |
| APOC1     | turquoise | -0.3712547 | 1.97E-07   | 0.46884192 | 1.69E-11   | 0.50673278 |
| APOBEC3F  | turquoise | -0.4300764 | 9.99E-10   | -0.0079472 | 0.9145014  | 0.73601338 |
| APLNR     | turquoise | -0.334858  | 3.18E-06   | 0.2466663  | 0.00071246 | 0.49651871 |
| APLN      | turquoise | -0.2614499 | 0.00032473 | 0.28362152 | 9.15E-05   | 0.26528321 |
| APBA2     | turquoise | 0.418114   | 3.18E-09   | -0.7146009 | 3.26E-30   | -0.6435157 |
| AP5M1     | turquoise | 0.65742345 | 2.87E-24   | -0.3214727 | 8.12E-06   | -0.1488185 |
| AP3S1     | turquoise | 0.47465384 | 8.75E-12   | -0.129084  | 0.0799173  | -0.8312343 |
| AP3M2     | turquoise | 0.61526364 | 1.19E-20   | -0.8227414 | 9.07E-47   | -0.4219261 |
| AP1S2     | turquoise | 0.74026845 | 2.21E-33   | -0.5508581 | 4.51E-16   | -0.4727751 |
| AP1S1     | turquoise | 0.59451182 | 4.59E-19   | -0.5196017 | 3.49E-14   | -0.835307  |
| ANXA7     | turquoise | 0.46574076 | 2.38E-11   | -0.1763317 | 0.01635216 | -0.6050047 |
| ANXA6     | turquoise | 0.55558898 | 2.24E-16   | -0.6947309 | 5.46E-28   | -0.5245669 |
| ANXA2     | turquoise | -0.452687  | 9.84E-11   | 0.6458639  | 3.21E-23   | 0.37155274 |
| ANP32B    | turquoise | -0.5563682 | 2.00E-16   | 0.52849314 | 1.06E-14   | 0.7263233  |
| ANO3      | turquoise | 0.61513623 | 1.21E-20   | -0.7389095 | 3.32E-33   | -0.4393653 |
| ANKRD9    | turquoise | -0.4637774 | 2.96E-11   | 0.20557289 | 0.00499761 | 0.50803397 |
| ANKRD6    | turquoise | 0.61273772 | 1.88E-20   | -0.522356  | 2.42E-14   | -0.2835652 |
| ANKRD50   | turquoise | 0.42581943 | 1.52E-09   | -0.523418  | 2.10E-14   | -0.5789413 |
| ANKRD46   | turquoise | 0.68034054 | 1.73E-26   | -0.5444026 | 1.15E-15   | -0.7678296 |
| ANKRD40   | turquoise | -0.6396067 | 1.13E-22   | 0.50506867 | 2.28E-13   | 0.55760989 |
| ANKRD34A  | turquoise | 0.45630832 | 6.68E-11   | -0.7547008 | 2.47E-35   | -0.4349845 |

|           |           |            |            |            |            |            |
|-----------|-----------|------------|------------|------------|------------|------------|
| ANKRD33   | turquoise | -0.3261514 | 5.88E-06   | 0.10262315 | 0.1645174  | 0.6287959  |
| ANKRD29   | turquoise | 0.60835123 | 4.13E-20   | -0.279246  | 0.00011847 | -0.4780677 |
| ANKRD27   | turquoise | 0.43257576 | 7.79E-10   | -0.131967  | 0.07335449 | -0.5139493 |
| ANKRD20A1 | turquoise | -0.4347517 | 6.27E-10   | 0.13310808 | 0.07088078 | 0.67011346 |
| ANKRD18A  | turquoise | -0.3377906 | 2.57E-06   | 0.0821876  | 0.26606156 | 0.64679411 |
| ANKRD13C  | turquoise | 0.59162039 | 7.49E-19   | -0.1978884 | 0.00693218 | -0.7935419 |
| ANKRA2    | turquoise | 0.65042523 | 1.25E-23   | -0.1866874 | 0.01094588 | -0.570981  |
| ANKMY2    | turquoise | 0.64236389 | 6.52E-23   | -0.3939374 | 2.89E-08   | -0.8213858 |
| ANKLE2    | turquoise | 0.50149534 | 3.56E-13   | -0.2061123 | 0.00488204 | -0.7238139 |
| ANKIB1    | turquoise | -0.3506281 | 9.93E-07   | 0.68036995 | 1.72E-26   | 0.5485325  |
| ANKFY1    | turquoise | -0.4624594 | 3.42E-11   | 0.77763577 | 9.88E-39   | 0.3360859  |
| ANKDD1A   | turquoise | -0.1770955 | 0.01588594 | 0.13862047 | 0.05986887 | 0.54514369 |
| ANK3      | turquoise | 0.59895441 | 2.15E-19   | -0.4918134 | 1.17E-12   | -0.2429742 |
| ANGPTL4   | turquoise | -0.5419375 | 1.63E-15   | 0.35802945 | 5.63E-07   | 0.47049419 |
| ANGPT2    | turquoise | -0.398712  | 1.90E-08   | 0.56446084 | 5.87E-17   | 0.37216297 |
| ANAPC16   | turquoise | -0.302019  | 2.94E-05   | 0.72568203 | 1.55E-31   | 0.60356022 |
| ANAPC13   | turquoise | 0.59557186 | 3.84E-19   | -0.3732793 | 1.67E-07   | -0.7526785 |
| ANAPC10   | turquoise | 0.49958626 | 4.52E-13   | 0.00032854 | 0.99645872 | -0.7327508 |
| AMY2A     | turquoise | 0.43573383 | 5.68E-10   | -0.2980975 | 3.77E-05   | -0.0508776 |
| AMY1A     | turquoise | 0.48499536 | 2.63E-12   | -0.3433246 | 1.72E-06   | -0.0073054 |
| AMPH      | turquoise | 0.71326065 | 4.67E-30   | -0.7064596 | 2.80E-29   | -0.6703158 |
| AMACR     | turquoise | 0.60336844 | 9.97E-20   | -0.3615395 | 4.28E-07   | -0.7388559 |
| ALPL      | turquoise | -0.4272521 | 1.32E-09   | 0.49290838 | 1.02E-12   | 0.43247322 |
| ALG6      | turquoise | 0.33203465 | 3.89E-06   | 0.09800682 | 0.1844428  | -0.4339332 |
| ALDH8A1   | turquoise | -0.3913738 | 3.62E-08   | 0.09070865 | 0.21946881 | 0.84569174 |
| ALDH5A1   | turquoise | 0.38691474 | 5.32E-08   | 0.03531389 | 0.6332096  | -0.6445376 |
| ALDH1L1   | turquoise | -0.6689179 | 2.34E-25   | 0.55014153 | 5.01E-16   | 0.45180833 |
| AKT1      | turquoise | -0.7156104 | 2.49E-30   | 0.41234942 | 5.47E-09   | 0.73525784 |
| AKR1C3    | turquoise | -0.528035  | 1.13E-14   | 0.80137466 | 1.05E-42   | 0.63031614 |
| AKNA      | turquoise | -0.5248533 | 1.73E-14   | 0.41591518 | 3.92E-09   | 0.38409069 |
| AKIRIN2   | turquoise | 0.4790944  | 5.25E-12   | -0.1925553 | 0.00864191 | -0.886364  |
| AKAP8L    | turquoise | -0.4067623 | 9.17E-09   | -0.1099677 | 0.1361959  | 0.36912489 |
| AKAP6     | turquoise | 0.63241014 | 4.68E-22   | -0.5751819 | 1.10E-17   | -0.7652831 |
| AKAP12    | turquoise | 0.50823436 | 1.53E-13   | -0.0379235 | 0.60829829 | -0.1286356 |
| AKAP11    | turquoise | 0.70560296 | 3.50E-29   | -0.486471  | 2.21E-12   | -0.8183503 |
| AK5       | turquoise | 0.57565798 | 1.02E-17   | -0.7185574 | 1.12E-30   | -0.6246111 |
| AK4       | turquoise | -0.3443321 | 1.59E-06   | 0.50781337 | 1.61E-13   | 0.59168529 |
| AK2       | turquoise | -0.641104  | 8.40E-23   | 0.61975739 | 5.18E-21   | 0.48373585 |
| AIMP2     | turquoise | 0.32036631 | 8.76E-06   | -0.1583009 | 0.03138788 | -0.2667118 |
| AIG1      | turquoise | 0.38436169 | 6.61E-08   | -0.2482844 | 0.00065522 | -0.8447287 |
| AIFM3     | turquoise | -0.6594467 | 1.86E-24   | 0.47175662 | 1.22E-11   | 0.52232178 |
| AIF1L     | turquoise | -0.5917052 | 7.38E-19   | 0.43622943 | 5.40E-10   | 0.60151753 |
| AHNAK     | turquoise | -0.6469888 | 2.55E-23   | 0.76889827 | 2.16E-37   | 0.70559278 |
| AHI1      | turquoise | 0.59622487 | 3.43E-19   | -0.7708507 | 1.10E-37   | -0.3400585 |
| AGPAT4    | turquoise | 0.37524728 | 1.42E-07   | -0.639762  | 1.10E-22   | -0.3253008 |
| AGK       | turquoise | 0.70735858 | 2.22E-29   | -0.5955518 | 3.85E-19   | -0.809546  |

|          |           |            |            |            |            |            |
|----------|-----------|------------|------------|------------|------------|------------|
| AGGF1    | turquoise | 0.75987899 | 4.56E-36   | -0.5540116 | 2.84E-16   | -0.66785   |
| AGFG2    | turquoise | -0.5875546 | 1.48E-18   | 0.52860182 | 1.04E-14   | 0.43849519 |
| AGFG1    | turquoise | 0.54517372 | 1.03E-15   | -0.09147   | 0.21560809 | -0.740349  |
| AFTPH    | turquoise | 0.56002552 | 1.15E-16   | -0.7172026 | 1.62E-30   | -0.6533364 |
| AFF3     | turquoise | 0.5456892  | 9.56E-16   | -0.4882017 | 1.80E-12   | -0.3397196 |
| AFF2     | turquoise | 0.7002043  | 1.39E-28   | -0.7362267 | 7.37E-33   | -0.4777729 |
| AEBP1    | turquoise | -0.5091608 | 1.36E-13   | 0.56572007 | 4.84E-17   | 0.47884219 |
| ADORA2A  | turquoise | -0.5714451 | 1.99E-17   | 0.46726253 | 2.01E-11   | 0.60373372 |
| ADO      | turquoise | 0.67158548 | 1.29E-25   | -0.4622075 | 3.52E-11   | -0.5292425 |
| ADIRF    | turquoise | -0.6353708 | 2.62E-22   | 0.50932951 | 1.33E-13   | 0.64887342 |
| ADH1A    | turquoise | -0.4259298 | 1.50E-09   | 0.65357959 | 6.48E-24   | 0.25912555 |
| ADGRL3   | turquoise | 0.5529842  | 3.30E-16   | -0.0009397 | 0.98987185 | -0.4026194 |
| ADGRL2   | turquoise | 0.45777699 | 5.70E-11   | -0.4883473 | 1.77E-12   | -0.2712852 |
| ADGRG1   | turquoise | -0.6036662 | 9.46E-20   | 0.64108748 | 8.43E-23   | 0.14872341 |
| ADGRB3   | turquoise | 0.61797734 | 7.20E-21   | -0.3389393 | 2.37E-06   | -0.7948248 |
| ADGRA2   | turquoise | -0.5307578 | 7.78E-15   | 0.39161388 | 3.54E-08   | 0.58266966 |
| ADCYAP1  | turquoise | 0.62678996 | 1.38E-21   | -0.7668876 | 4.32E-37   | -0.5038263 |
| ADCY4    | turquoise | -0.529825  | 8.84E-15   | 0.44810115 | 1.60E-10   | 0.73540486 |
| ADCY1    | turquoise | 0.53356592 | 5.29E-15   | -0.6239591 | 2.36E-21   | -0.7867652 |
| ADARB2   | turquoise | -0.4033049 | 1.26E-08   | 0.57481873 | 1.17E-17   | 0.33229945 |
| ADARB1   | turquoise | 0.60990429 | 3.13E-20   | -0.6986563 | 2.05E-28   | -0.3810635 |
| ADAP2    | turquoise | -0.3272517 | 5.45E-06   | 0.50863167 | 1.45E-13   | 0.59144806 |
| ADAP1    | turquoise | -0.3733578 | 1.66E-07   | 0.02883673 | 0.69679944 | 0.77203771 |
| ADAMTSL2 | turquoise | -0.3981833 | 1.99E-08   | 0.17447529 | 0.01753545 | 0.72763784 |
| ADAMTS9  | turquoise | -0.2742517 | 0.00015833 | 0.36630895 | 2.93E-07   | 0.22996633 |
| ADAMTS8  | turquoise | 0.39452053 | 2.75E-08   | -0.6454024 | 3.52E-23   | -0.2940591 |
| ADAMTS1  | turquoise | -0.3544222 | 7.44E-07   | 0.58085037 | 4.43E-18   | 0.26054899 |
| ADAM23   | turquoise | 0.60347212 | 9.79E-20   | -0.802765  | 5.94E-43   | -0.6363531 |
| ADA      | turquoise | -0.5030985 | 2.92E-13   | 0.27166201 | 0.00018362 | 0.39187252 |
| ACYP2    | turquoise | 0.21428199 | 0.0034017  | 0.01244116 | 0.86652216 | -0.8088669 |
| ACYP1    | turquoise | 0.45252017 | 1.00E-10   | -0.2669157 | 0.00024    | -0.8305039 |
| ACVR2A   | turquoise | 0.63182411 | 5.24E-22   | -0.3617141 | 4.22E-07   | -0.8146933 |
| ACTR6    | turquoise | 0.63454625 | 3.08E-22   | -0.3968607 | 2.24E-08   | -0.6429137 |
| ACTR3B   | turquoise | 0.57801276 | 7.01E-18   | -0.5884245 | 1.28E-18   | -0.8364102 |
| ACTR3    | turquoise | 0.53823291 | 2.76E-15   | -0.1915532 | 0.00900198 | -0.0987294 |
| ACTR2    | turquoise | 0.59027498 | 9.39E-19   | -0.2382689 | 0.00109075 | -0.7193605 |
| ACTR10   | turquoise | 0.5746623  | 1.20E-17   | -0.3806619 | 9.04E-08   | -0.9183567 |
| ACTN4    | turquoise | -0.6242442 | 2.24E-21   | 0.14308618 | 0.05201602 | 0.33231179 |
| ACTN2    | turquoise | 0.70874686 | 1.54E-29   | -0.6665744 | 3.93E-25   | -0.7282286 |
| ACTN1    | turquoise | -0.5605239 | 1.07E-16   | 0.23252639 | 0.00144736 | 0.72368601 |
| ACTL6B   | turquoise | 0.39931407 | 1.80E-08   | -0.8452377 | 1.10E-51   | -0.2511149 |
| ACTG1    | turquoise | 0.43693609 | 5.03E-10   | -0.4392081 | 4.00E-10   | -0.6809692 |
| ACTB     | turquoise | 0.20838989 | 0.00442005 | -0.4673442 | 2.00E-11   | -0.7278217 |
| ACTA2    | turquoise | -0.321171  | 8.29E-06   | 0.59129226 | 7.92E-19   | 0.21237414 |
| ACSS3    | turquoise | -0.4428125 | 2.76E-10   | 0.68205857 | 1.16E-26   | 0.659383   |
| ACSS2    | turquoise | -0.3782298 | 1.11E-07   | 0.15430332 | 0.03598444 | 0.8181858  |

|          |           |            |            |            |            |            |
|----------|-----------|------------|------------|------------|------------|------------|
| ACSS1    | turquoise | -0.5483052 | 6.55E-16   | 0.52206474 | 2.52E-14   | 0.75933471 |
| ACSL6    | turquoise | 0.34112871 | 2.02E-06   | -0.2059759 | 0.00491104 | -0.4401101 |
| ACSL4    | turquoise | 0.6842322  | 6.92E-27   | -0.4175868 | 3.34E-09   | -0.8500447 |
| ACSL3    | turquoise | 0.45779665 | 5.69E-11   | -0.0916076 | 0.21491556 | -0.808319  |
| ACSF2    | turquoise | -0.5377646 | 2.95E-15   | 0.4424847  | 2.86E-10   | 0.80583611 |
| ACSBG1   | turquoise | -0.5630465 | 7.29E-17   | 0.67874388 | 2.50E-26   | 0.52295747 |
| ACP1     | turquoise | 0.51874304 | 3.91E-14   | -0.2926774 | 5.28E-05   | -0.9234608 |
| ACOT7    | turquoise | 0.62692062 | 1.35E-21   | -0.8013692 | 1.06E-42   | -0.317414  |
| ACOT11   | turquoise | -0.32199   | 7.84E-06   | 0.4408824  | 3.37E-10   | 0.55662732 |
| ACKR3    | turquoise | -0.324136  | 6.76E-06   | 0.77424627 | 3.33E-38   | 0.44342841 |
| ACER3    | turquoise | -0.5696621 | 2.63E-17   | 0.3703137  | 2.12E-07   | 0.45335812 |
| ACAT2    | turquoise | 0.50023476 | 4.17E-13   | -0.3048875 | 2.45E-05   | -0.8207372 |
| ACADVL   | turquoise | -0.7734902 | 4.35E-38   | 0.53526127 | 4.18E-15   | 0.48293023 |
| ACAD8    | turquoise | 0.2756405  | 0.00014614 | 0.05597441 | 0.44918906 | -0.7802412 |
| ACAA1    | turquoise | -0.6324401 | 4.65E-22   | 0.33915758 | 2.33E-06   | 0.27301552 |
| ABRACL   | turquoise | 0.50491871 | 2.32E-13   | -0.5057603 | 2.09E-13   | -0.2360243 |
| ABLIM1   | turquoise | -0.5826222 | 3.32E-18   | 0.69790643 | 2.48E-28   | 0.47831331 |
| ABI1     | turquoise | 0.46750887 | 1.96E-11   | 0.04878905 | 0.50957606 | -0.5208069 |
| ABCG1    | turquoise | -0.441326  | 3.22E-10   | 0.472158   | 1.16E-11   | 0.51002138 |
| ABCE1    | turquoise | 0.59343895 | 5.51E-19   | -0.2968807 | 4.07E-05   | -0.8597876 |
| ABCC12   | turquoise | 0.64905329 | 1.66E-23   | -0.6512719 | 1.05E-23   | -0.3306575 |
| ABCB10   | turquoise | 0.43249664 | 7.86E-10   | 0.13199293 | 0.07329748 | -0.677609  |
| ABCA7    | turquoise | -0.3903907 | 3.94E-08   | -0.0666599 | 0.36730613 | 0.54060244 |
| ABCA5    | turquoise | 0.76356747 | 1.33E-36   | -0.6840036 | 7.31E-27   | -0.3971042 |
| ABCA1    | turquoise | -0.4125385 | 5.38E-09   | 0.7813633  | 2.54E-39   | 0.53083492 |
| AATF     | turquoise | -0.6564214 | 3.55E-24   | 0.35933951 | 5.08E-07   | 0.44024259 |
| AASDHPPT | turquoise | 0.70598246 | 3.17E-29   | -0.454462  | 8.14E-11   | -0.8057181 |
| AACS     | turquoise | 0.35175909 | 9.12E-07   | -0.6037688 | 9.29E-20   | -0.5063543 |
| ZNF22    | yellow    | -0.3812234 | 8.62E-08   | 0.76955301 | 1.73E-37   | 0.64222893 |
| ZFP36L1  | yellow    | -0.2328661 | 0.00142361 | 0.74490833 | 5.38E-34   | 0.39561945 |
| ZC3HAV1  | yellow    | -0.4014155 | 1.49E-08   | 0.76023788 | 4.05E-36   | 0.57536663 |
| YJEFN3   | yellow    | 0.21345742 | 0.00353012 | -0.5335801 | 5.28E-15   | -0.6768795 |
| YES1     | yellow    | -0.3575785 | 5.83E-07   | 0.76474897 | 8.94E-37   | 0.64552253 |
| VSTM2L   | yellow    | 0.29176863 | 5.59E-05   | -0.7465031 | 3.29E-34   | -0.4919771 |
| USP11    | yellow    | 0.16522636 | 0.02460427 | -0.714416  | 3.43E-30   | -0.6058042 |
| TRANK1   | yellow    | 0.2447808  | 0.00078496 | -0.6715691 | 1.29E-25   | -0.4717888 |
| TMEM151B | yellow    | 0.33405767 | 3.37E-06   | -0.6398726 | 1.08E-22   | -0.422314  |
| THY1     | yellow    | 0.19419829 | 0.00807914 | -0.715062  | 2.88E-30   | -0.37647   |
| SYP      | yellow    | 0.18305027 | 0.01263172 | -0.5812555 | 4.15E-18   | -0.7375464 |
| SYNGR3   | yellow    | 0.35224083 | 8.79E-07   | -0.6542164 | 5.66E-24   | -0.8139118 |
| SYN1     | yellow    | 0.22624719 | 0.00195693 | -0.6403181 | 9.84E-23   | -0.6036389 |
| STXBP1   | yellow    | 0.42182935 | 2.23E-09   | -0.5737573 | 1.38E-17   | -0.9227769 |
| STX1A    | yellow    | 0.19429825 | 0.00804598 | -0.5836501 | 2.81E-18   | -0.7210516 |
| SNHG6    | yellow    | -0.4155572 | 4.05E-09   | 0.64055379 | 9.38E-23   | 0.66928378 |
| SLC6A17  | yellow    | 0.34247237 | 1.83E-06   | -0.7168677 | 1.77E-30   | -0.7146284 |
| SCAMP5   | yellow    | 0.19574559 | 0.00757915 | -0.7401195 | 2.31E-33   | -0.5204295 |

|         |        |            |            |            |          |            |
|---------|--------|------------|------------|------------|----------|------------|
| SCAF11  | yellow | -0.4219843 | 2.20E-09   | 0.79678722 | 6.78E-42 | 0.67903853 |
| RUNDC3A | yellow | 0.24865419 | 0.00064275 | -0.5726418 | 1.65E-17 | -0.5396104 |
| RNMT    | yellow | 0.35348891 | 7.99E-07   | -0.6764202 | 4.28E-26 | -0.7485502 |
| RNF112  | yellow | 0.24873848 | 0.00063994 | -0.7299597 | 4.58E-32 | -0.4015478 |
| PRRT1   | yellow | 0.2484597  | 0.00064928 | -0.7115822 | 7.30E-30 | -0.5925446 |
| PPP2R5D | yellow | 0.19538595 | 0.00769284 | -0.6532131 | 7.00E-24 | -0.5574569 |
| PPME1   | yellow | 0.16647443 | 0.02352635 | -0.8082837 | 5.81E-44 | -0.3905017 |
| PNMAL2  | yellow | 0.33003762 | 4.48E-06   | -0.8080524 | 6.42E-44 | -0.5461166 |
| PNMA6A  | yellow | 0.36033646 | 4.70E-07   | -0.8782049 | 1.62E-60 | -0.4810332 |
| PNKD    | yellow | 0.14180275 | 0.05418008 | -0.6442051 | 4.49E-23 | -0.6057408 |
| PKNOX2  | yellow | 0.33837207 | 2.47E-06   | -0.7072469 | 2.28E-29 | -0.5834143 |
| PAK6    | yellow | 0.25528235 | 0.00045324 | -0.5260531 | 1.48E-14 | -0.4541617 |
| PAK2    | yellow | -0.2931296 | 5.14E-05   | 0.65176593 | 9.47E-24 | 0.71899954 |
| P4HTM   | yellow | 0.27310312 | 0.00016911 | -0.7453685 | 4.67E-34 | -0.4347495 |
| OGDHL   | yellow | 0.27799737 | 0.00012744 | -0.696341  | 3.66E-28 | -0.5831879 |
| NRGN    | yellow | 0.18716131 | 0.0107415  | -0.656867  | 3.23E-24 | -0.5865297 |
| NPTXR   | yellow | 0.196461   | 0.00735742 | -0.5685299 | 3.13E-17 | -0.7000973 |
| NPM2    | yellow | 0.29742801 | 3.93E-05   | -0.6965592 | 3.47E-28 | -0.5561478 |
| NOMO1   | yellow | 0.27389908 | 0.00016157 | -0.7043817 | 4.79E-29 | -0.6111395 |
| MICU1   | yellow | 0.22211662 | 0.00237612 | -0.6251427 | 1.89E-21 | -0.6580754 |
| MICAL2  | yellow | 0.41569027 | 4.00E-09   | -0.7145381 | 3.32E-30 | -0.735348  |
| MAST3   | yellow | 0.23153565 | 0.00151871 | -0.7115541 | 7.36E-30 | -0.3873021 |
| LINGO1  | yellow | 0.28156107 | 0.00010337 | -0.8199846 | 3.25E-46 | -0.3491349 |
| LAMC1   | yellow | -0.4086915 | 7.68E-09   | 0.84846538 | 1.86E-52 | 0.55630894 |
| KATNB1  | yellow | 0.2575019  | 0.00040237 | -0.6996958 | 1.58E-28 | -0.3842028 |
| ICAM5   | yellow | 0.29679085 | 4.09E-05   | -0.7114175 | 7.63E-30 | -0.6695716 |
| HSPB8   | yellow | -0.3479823 | 1.21E-06   | 0.69106359 | 1.34E-27 | 0.57576435 |
| GPI     | yellow | 0.16763442 | 0.0225612  | -0.7116021 | 7.27E-30 | -0.638453  |
| GAS7    | yellow | 0.2657433  | 0.00025622 | -0.6927448 | 8.90E-28 | -0.6614337 |
| FNDC3B  | yellow | -0.2370362 | 0.00115969 | 0.67058177 | 1.61E-25 | 0.3137351  |
| FERMT2  | yellow | -0.3489377 | 1.13E-06   | 0.7906169  | 7.70E-41 | 0.48698155 |
| FAM127A | yellow | 0.32295141 | 7.34E-06   | -0.7086031 | 1.60E-29 | -0.633243  |
| ENTPD6  | yellow | 0.21105185 | 0.00393016 | -0.6458216 | 3.23E-23 | -0.6595467 |
| ENO2    | yellow | 0.40332514 | 1.25E-08   | -0.8806436 | 2.85E-61 | -0.5471385 |
| EHD3    | yellow | 0.4560664  | 6.86E-11   | -0.7220381 | 4.29E-31 | -0.7058535 |
| EFHD2   | yellow | 0.18951516 | 0.0097755  | -0.6607344 | 1.41E-24 | -0.2805656 |
| DPP6    | yellow | 0.47285654 | 1.07E-11   | -0.8513285 | 3.74E-53 | -0.5917935 |
| CRMP1   | yellow | 0.34185201 | 1.91E-06   | -0.7488412 | 1.59E-34 | -0.6147458 |
| CPNE9   | yellow | 0.33454742 | 3.25E-06   | -0.634517  | 3.10E-22 | -0.6297291 |
| CNTNAP1 | yellow | 0.23952911 | 0.00102417 | -0.5928489 | 6.09E-19 | -0.5376012 |
| CLTB    | yellow | 0.41939193 | 2.82E-09   | -0.6604559 | 1.50E-24 | -0.7755677 |
| CLSTN1  | yellow | 0.38635092 | 5.58E-08   | -0.7086036 | 1.60E-29 | -0.7168865 |
| CKMT1B  | yellow | 0.45325329 | 9.26E-11   | -0.7881268 | 2.01E-40 | -0.5832173 |
| CKMT1A  | yellow | 0.43104239 | 9.08E-10   | -0.7772127 | 1.15E-38 | -0.657622  |
| CHST1   | yellow | 0.15367396 | 0.03675758 | -0.5416605 | 1.70E-15 | -0.6671956 |
| CHRM1   | yellow | 0.34716914 | 1.29E-06   | -0.7282834 | 7.40E-32 | -0.7143558 |



|          |        |            |            |            |          |            |
|----------|--------|------------|------------|------------|----------|------------|
| CELSR2   | yellow | 0.23141762 | 0.00152743 | -0.6324118 | 4.68E-22 | -0.5375198 |
| CDK5R2   | yellow | 0.3237789  | 6.93E-06   | -0.7805484 | 3.42E-39 | -0.3135111 |
| CCDC184  | yellow | 0.47484598 | 8.56E-12   | -0.7925255 | 3.67E-41 | -0.5581325 |
| CAMK1G   | yellow | 0.17660911 | 0.01618149 | -0.6519947 | 9.03E-24 | -0.7035107 |
| CACNG3   | yellow | 0.35389647 | 7.74E-07   | -0.7803408 | 3.69E-39 | -0.4984169 |
| C16orf45 | yellow | 0.32430007 | 6.69E-06   | -0.7292155 | 5.67E-32 | -0.7076236 |
| ATXN7L3B | yellow | 0.30581731 | 2.30E-05   | -0.7659574 | 5.94E-37 | -0.4788081 |
| ARF5     | yellow | 0.19100239 | 0.0092055  | -0.7253895 | 1.68E-31 | -0.5131398 |
| ABLIM2   | yellow | 0.43241208 | 7.92E-10   | -0.7375209 | 5.03E-33 | -0.6056453 |

| p.MMblue   | MMred      | p.MMred    | MMturquois | p.MMturquoc | MMyellow   | p.MMyellow |
|------------|------------|------------|------------|-------------|------------|------------|
| 3.12E-06   | -0.0536909 | 0.46793107 | -0.1396804 | 0.05792192  | 0.26984584 | 0.00020355 |
| 1.82E-08   | 0.01419198 | 0.84795123 | -0.0893968 | 0.22623632  | 0.42327345 | 1.94E-09   |
| 5.82E-14   | -0.1625319 | 0.02707685 | 0.09351984 | 0.20545483  | 0.51915383 | 3.71E-14   |
| 2.97E-07   | 0.03733601 | 0.61386886 | -0.0969342 | 0.18931597  | 0.443712   | 2.52E-10   |
| 1.92E-08   | -0.1185342 | 0.10805827 | -0.0304836 | 0.68040773  | 0.49554205 | 7.42E-13   |
| 1.11E-05   | 0.00922298 | 0.90084146 | -0.1105571 | 0.13409599  | 0.46762202 | 1.93E-11   |
| 6.45E-07   | -0.0237341 | 0.74845583 | 0.02305065 | 0.75546685  | 0.65221073 | 8.63E-24   |
| 1.59E-07   | -0.0029455 | 0.96825896 | -0.0655003 | 0.3757178   | 0.44197924 | 3.01E-10   |
| 1.76E-07   | 0.18218557 | 0.01306458 | -0.0250198 | 0.73532377  | 0.35989052 | 4.87E-07   |
| 4.39E-10   | -0.1381032 | 0.0608385  | 0.03790172 | 0.60850463  | 0.56298852 | 7.36E-17   |
| 0.02267911 | 0.12750574 | 0.08370577 | -0.2248009 | 0.00209537  | 0.4045053  | 1.13E-08   |
| 0.00025749 | 0.0452842  | 0.54049075 | -0.1050005 | 0.15490539  | 0.20418453 | 0.00530643 |
| 2.59E-14   | -0.062808  | 0.39569782 | 0.06876073 | 0.35236624  | 0.48549794 | 2.48E-12   |
| 2.20E-05   | 0.09686778 | 0.18962103 | -0.1231402 | 0.09493964  | 0.37803251 | 1.13E-07   |
| 4.41E-06   | 0.05506667 | 0.45658842 | -0.1124258 | 0.12760204  | 0.39441239 | 2.77E-08   |
| 3.17E-12   | -0.1485516 | 0.04358748 | 0.07806787 | 0.29085231  | 0.52874229 | 1.03E-14   |
| 0.00614258 | 0.08524352 | 0.24863144 | -0.1243299 | 0.09176565  | 0.06298351 | 0.39437617 |
| 6.33E-11   | -0.0073672 | 0.92072031 | -0.0066693 | 0.92820946  | 0.4431373  | 2.67E-10   |
| 0.01007948 | 0.05646488 | 0.44521931 | -0.2917852 | 5.58E-05    | 0.12387011 | 0.0929822  |
| 0.14737722 | -0.3430434 | 1.75E-06   | -0.0372414 | 0.61476832  | 0.40707313 | 8.91E-09   |
| 7.34E-07   | 0.00863702 | 0.90711192 | -0.1194886 | 0.10522927  | 0.27832462 | 0.00012503 |
| 0.00336335 | 0.01607562 | 0.82806489 | -0.1789841 | 0.01478248  | 0.37660418 | 1.27E-07   |
| 2.30E-12   | -0.0174363 | 0.81376702 | 0.03362537 | 0.64955308  | 0.46432519 | 2.79E-11   |
| 3.93E-08   | -0.0852309 | 0.24870173 | -0.0261942 | 0.72339498  | 0.49142285 | 1.22E-12   |
| 1.96E-06   | -0.0391542 | 0.59670233 | 0.00789387 | 0.91507287  | 0.6119968  | 2.15E-20   |
| 2.30E-09   | -0.1900901 | 0.00955156 | 0.04221466 | 0.5683087   | 0.59724381 | 2.88E-19   |
| 2.17E-07   | -0.0489885 | 0.50784498 | -0.0911629 | 0.21715962  | 0.39883439 | 1.88E-08   |
| 9.76E-14   | -0.074909  | 0.3108734  | 0.04515452 | 0.54165215  | 0.46088173 | 4.07E-11   |
| 5.23E-06   | -0.0614116 | 0.40630689 | -0.1599879 | 0.02960368  | 0.14453103 | 0.04966608 |
| 9.39E-08   | -0.0928087 | 0.20893761 | -0.0605617 | 0.41284506  | 0.35330472 | 8.10E-07   |
| 3.82E-07   | -0.048748  | 0.5099325  | -0.0270109 | 0.71513835  | 0.56036941 | 1.10E-16   |
| 1.42E-06   | 0.26503892 | 0.00026645 | -0.0860437 | 0.24420146  | 0.41868678 | 3.01E-09   |
| 5.48E-48   | 0.29894751 | 3.57E-05   | -0.5707082 | 2.23E-17    | -0.3221683 | 7.75E-06   |
| 1.05E-64   | 0.46769553 | 1.92E-11   | -0.758512  | 7.15E-36    | -0.4887963 | 1.68E-12   |
| 9.41E-34   | 0.3511735  | 9.53E-07   | -0.6545603 | 5.27E-24    | -0.3907244 | 3.83E-08   |
| 1.82E-60   | 0.3855637  | 5.97E-08   | -0.761554  | 2.61E-36    | -0.426188  | 1.46E-09   |
| 6.05E-35   | 0.31744679 | 1.07E-05   | -0.5855787 | 2.05E-18    | -0.6684822 | 2.58E-25   |
| 2.04E-69   | 0.41457302 | 4.44E-09   | -0.8638263 | 2.21E-56    | -0.5668058 | 4.09E-17   |
| 1.69E-74   | 0.45179845 | 1.08E-10   | -0.8024821 | 6.68E-43    | -0.6414848 | 7.78E-23   |
| 2.81E-68   | 0.388727   | 4.55E-08   | -0.7973947 | 5.32E-42    | -0.5919562 | 7.08E-19   |
| 1.05E-46   | 0.42342049 | 1.91E-09   | -0.70831   | 1.73E-29    | -0.5954789 | 3.90E-19   |
| 0.70611764 | 0.065556   | 0.37531121 | 0.03512098 | 0.63506806  | -0.0083229 | 0.91047548 |
| 2.75E-61   | 0.49499383 | 7.94E-13   | -0.8275106 | 9.45E-48    | -0.6332129 | 4.00E-22   |
| 6.58E-43   | 0.37894998 | 1.04E-07   | -0.6567988 | 3.28E-24    | -0.4644431 | 2.75E-11   |
| 1.19E-52   | 0.40492286 | 1.08E-08   | -0.6981824 | 2.31E-28    | -0.6130427 | 1.78E-20   |

|            |            |            |            |            |            |            |
|------------|------------|------------|------------|------------|------------|------------|
| 3.82E-47   | 0.41965171 | 2.75E-09   | -0.6618877 | 1.10E-24   | -0.3722614 | 1.81E-07   |
| 3.90E-63   | 0.40740528 | 8.64E-09   | -0.6399543 | 1.06E-22   | -0.4744725 | 8.93E-12   |
| 2.98E-34   | 0.34028554 | 2.15E-06   | -0.5662063 | 4.49E-17   | -0.4719395 | 1.19E-11   |
| 8.46E-77   | 0.48566374 | 2.43E-12   | -0.7431171 | 9.32E-34   | -0.5265239 | 1.38E-14   |
| 9.94E-49   | 0.5429119  | 1.42E-15   | -0.624183  | 2.26E-21   | -0.4562486 | 6.72E-11   |
| 0.6517778  | 0.01233175 | 0.86768526 | 0.07623095 | 0.30238753 | -0.0073327 | 0.92109017 |
| 2.80E-56   | 0.52055034 | 3.08E-14   | -0.8495106 | 1.04E-52   | -0.6469811 | 2.55E-23   |
| 4.94E-40   | 0.32604654 | 5.93E-06   | -0.5877233 | 1.44E-18   | -0.4727148 | 1.09E-11   |
| 8.17E-53   | 0.39613298 | 2.38E-08   | -0.7149767 | 2.95E-30   | -0.6023706 | 1.19E-19   |
| 5.38E-47   | -0.5972719 | 2.87E-19   | 0.83308442 | 6.14E-49   | 0.65167996 | 9.64E-24   |
| 2.81E-65   | 0.46717537 | 2.03E-11   | -0.808463  | 5.38E-44   | -0.6288371 | 9.33E-22   |
| 1.82E-44   | 0.39638187 | 2.33E-08   | -0.6872244 | 3.39E-27   | -0.415364  | 4.13E-09   |
| 0.00033719 | 0.09910045 | 0.17956941 | -0.0570797 | 0.44027116 | -0.169675  | 0.02094608 |
| 1.27E-58   | 0.50426734 | 2.52E-13   | -0.8022851 | 7.24E-43   | -0.7218448 | 4.52E-31   |
| 1.32E-38   | 0.45680841 | 6.33E-11   | -0.5834833 | 2.89E-18   | -0.7681317 | 2.82E-37   |
| 3.68E-31   | 0.32261695 | 7.51E-06   | -0.5056322 | 2.12E-13   | -0.3612913 | 4.36E-07   |
| 3.00E-71   | 0.52522974 | 1.65E-14   | -0.7981018 | 4.00E-42   | -0.5826321 | 3.32E-18   |
| 1.97E-60   | 0.2787679  | 0.00012183 | -0.5612703 | 9.56E-17   | -0.4917758 | 1.17E-12   |
| 1.82E-42   | 0.55952624 | 1.24E-16   | -0.5965129 | 3.27E-19   | -0.4938809 | 9.09E-13   |
| 2.10E-71   | 0.41755236 | 3.36E-09   | -0.7975101 | 5.07E-42   | -0.5873062 | 1.54E-18   |
| 3.29E-75   | 0.41448815 | 4.48E-09   | -0.7322157 | 2.39E-32   | -0.4760498 | 7.46E-12   |
| 1.09E-47   | 0.27449124 | 0.00015616 | -0.6279414 | 1.11E-21   | -0.6943993 | 5.92E-28   |
| 3.45E-57   | 0.431711   | 8.49E-10   | -0.665836  | 4.63E-25   | -0.4252902 | 1.60E-09   |
| 3.17E-56   | 0.32180412 | 7.94E-06   | -0.759898  | 4.53E-36   | -0.5330751 | 5.66E-15   |
| 1.15E-36   | 0.19752183 | 0.00703925 | -0.4928631 | 1.03E-12   | -0.4726828 | 1.09E-11   |
| 1.52E-52   | 0.40149401 | 1.48E-08   | -0.7873921 | 2.66E-40   | -0.7329514 | 1.93E-32   |
| 3.69E-44   | 0.46011293 | 4.43E-11   | -0.7994112 | 2.35E-42   | -0.6002586 | 1.71E-19   |
| 1.62E-45   | 0.32108727 | 8.34E-06   | -0.7368297 | 6.17E-33   | -0.7373933 | 5.22E-33   |
| 7.53E-39   | 0.22899701 | 0.00171646 | -0.575936  | 9.77E-18   | -0.6842467 | 6.90E-27   |
| 1.36E-53   | 0.33925103 | 2.31E-06   | -0.698948  | 1.91E-28   | -0.4752468 | 8.18E-12   |
| 2.10E-53   | 0.31047984 | 1.70E-05   | -0.7511652 | 7.64E-35   | -0.5957711 | 3.71E-19   |
| 1.10E-70   | 0.40188011 | 1.43E-08   | -0.7094396 | 1.29E-29   | -0.6338864 | 3.51E-22   |
| 7.12E-56   | -0.3736871 | 1.61E-07   | 0.65493621 | 4.87E-24   | 0.52837659 | 1.08E-14   |
| 2.34E-62   | 0.39484732 | 2.67E-08   | -0.7145596 | 3.30E-30   | -0.6267105 | 1.40E-21   |
| 3.40E-34   | 0.35511756 | 7.05E-07   | -0.6025083 | 1.16E-19   | -0.3282589 | 5.08E-06   |
| 4.60E-49   | 0.31347741 | 1.39E-05   | -0.6125795 | 1.93E-20   | -0.3324978 | 3.76E-06   |
| 2.95E-40   | -0.3437216 | 1.67E-06   | 0.53198413 | 6.58E-15   | 0.84145794 | 8.31E-51   |
| 6.28E-39   | -0.5405208 | 2.00E-15   | 0.65299143 | 7.33E-24   | 0.62173204 | 3.59E-21   |
| 1.66E-39   | 0.36131633 | 4.35E-07   | -0.5534925 | 3.06E-16   | -0.3653477 | 3.16E-07   |
| 4.55E-28   | 0.1531294  | 0.03743783 | -0.497853  | 5.59E-13   | -0.6206025 | 4.43E-21   |
| 2.10E-32   | 0.2690298  | 0.00021315 | -0.5571555 | 1.78E-16   | -0.4032839 | 1.26E-08   |
| 3.36E-76   | 0.38047268 | 9.18E-08   | -0.7676296 | 3.35E-37   | -0.5429516 | 1.41E-15   |
| 3.47E-77   | 0.48095791 | 4.23E-12   | -0.8862501 | 4.56E-63   | -0.7019758 | 8.86E-29   |
| 1.35E-28   | -0.3011813 | 3.10E-05   | 0.62653801 | 1.45E-21   | 0.57783255 | 7.21E-18   |
| 6.27E-45   | 0.47651668 | 7.07E-12   | -0.7738512 | 3.83E-38   | -0.6756395 | 5.12E-26   |
| 1.49E-45   | 0.41297813 | 5.16E-09   | -0.6503745 | 1.27E-23   | -0.6601394 | 1.60E-24   |

|            |            |            |            |            |            |            |
|------------|------------|------------|------------|------------|------------|------------|
| 1.45E-41   | 0.27383004 | 0.00016221 | -0.5432717 | 1.35E-15   | -0.326355  | 5.80E-06   |
| 7.06E-101  | 0.49751891 | 5.83E-13   | -0.7619346 | 2.30E-36   | -0.6094561 | 3.39E-20   |
| 2.68E-44   | -0.3021817 | 2.91E-05   | 0.64388897 | 4.79E-23   | 0.70501155 | 4.07E-29   |
| 2.97E-51   | 0.55248065 | 3.55E-16   | -0.7967952 | 6.76E-42   | -0.6159194 | 1.05E-20   |
| 1.46E-78   | -0.472092  | 1.17E-11   | 0.70741385 | 2.18E-29   | 0.67457681 | 6.53E-26   |
| 3.06E-60   | 0.43551033 | 5.81E-10   | -0.8104879 | 2.25E-44   | -0.492932  | 1.02E-12   |
| 3.38E-60   | -0.5571791 | 1.77E-16   | 0.81983041 | 3.49E-46   | 0.70479899 | 4.30E-29   |
| 4.67E-50   | 0.4093388  | 7.24E-09   | -0.8191808 | 4.70E-46   | -0.7573168 | 1.06E-35   |
| 3.11E-60   | 0.37846306 | 1.09E-07   | -0.7343183 | 1.29E-32   | -0.6417721 | 7.35E-23   |
| 3.01E-51   | 0.46014335 | 4.41E-11   | -0.6733657 | 8.60E-26   | -0.7038835 | 5.44E-29   |
| 1.67E-41   | 0.4667888  | 2.12E-11   | -0.6409577 | 8.65E-23   | -0.6355754 | 2.52E-22   |
| 4.64E-37   | 0.30472031 | 2.47E-05   | -0.6411815 | 8.27E-23   | -0.6221823 | 3.30E-21   |
| 1.00E-34   | 0.33738733 | 2.65E-06   | -0.7013264 | 1.05E-28   | -0.6736917 | 7.98E-26   |
| 2.15E-35   | -0.3337053 | 3.45E-06   | 0.64152067 | 7.73E-23   | 0.69011811 | 1.69E-27   |
| 1.07E-35   | 0.55545971 | 2.29E-16   | -0.7210545 | 5.63E-31   | -0.5503236 | 4.88E-16   |
| 5.76E-36   | 0.2614363  | 0.00032497 | -0.5528475 | 3.37E-16   | -0.3005222 | 3.23E-05   |
| 1.22E-92   | 0.56736791 | 3.75E-17   | -0.8691142 | 7.60E-58   | -0.7172223 | 1.61E-30   |
| 6.14E-41   | -0.2144114 | 0.00338194 | 0.61014464 | 3.00E-20   | 0.71446527 | 3.38E-30   |
| 7.73E-30   | 0.23029965 | 0.00161223 | -0.6802568 | 1.76E-26   | -0.2504662 | 0.00058475 |
| 3.61E-23   | -0.3914434 | 3.60E-08   | 0.49430017 | 8.64E-13   | 0.70389975 | 5.42E-29   |
| 2.78E-40   | 0.31957095 | 9.25E-06   | -0.5597338 | 1.21E-16   | -0.5298686 | 8.79E-15   |
| 4.45E-90   | 0.46953584 | 1.56E-11   | -0.7453291 | 4.73E-34   | -0.738815  | 3.42E-33   |
| 1.68E-43   | 0.62683936 | 1.37E-21   | -0.8336263 | 4.68E-49   | -0.628236  | 1.05E-21   |
| 3.08E-70   | 0.43470777 | 6.30E-10   | -0.8047648 | 2.58E-43   | -0.6545263 | 5.31E-24   |
| 1.71E-17   | 0.09168775 | 0.2145127  | -0.4202598 | 2.59E-09   | -0.2663866 | 0.0002472  |
| 4.86E-19   | -0.125615  | 0.08843277 | 0.40998678 | 6.81E-09   | 0.41751495 | 3.37E-09   |
| 2.65E-27   | 0.311685   | 1.57E-05   | -0.6369974 | 1.90E-22   | -0.6702236 | 1.75E-25   |
| 6.29E-71   | 0.39618658 | 2.37E-08   | -0.6874237 | 3.23E-27   | -0.5062809 | 1.95E-13   |
| 4.70E-45   | 0.47694856 | 6.73E-12   | -0.6752937 | 5.54E-26   | -0.574676  | 1.19E-17   |
| 9.81E-28   | 0.38134909 | 8.53E-08   | -0.5671679 | 3.87E-17   | -0.4922967 | 1.10E-12   |
| 1.38E-25   | 0.25036912 | 0.00058773 | -0.5520854 | 3.77E-16   | -0.4098908 | 6.88E-09   |
| 3.17E-66   | 0.48309366 | 3.29E-12   | -0.8253116 | 2.70E-47   | -0.7800495 | 4.11E-39   |
| 1.74E-44   | 0.34194277 | 1.90E-06   | -0.6694694 | 2.07E-25   | -0.5036577 | 2.72E-13   |
| 3.53E-50   | 0.73588816 | 8.15E-33   | -0.7736796 | 4.07E-38   | -0.665519  | 4.96E-25   |
| 6.24E-38   | 0.37619503 | 1.31E-07   | -0.5219306 | 2.56E-14   | -0.2644273 | 0.00027564 |
| 4.46E-60   | 0.39328211 | 3.06E-08   | -0.7511249 | 7.73E-35   | -0.5713703 | 2.01E-17   |
| 1.33E-52   | 0.53536385 | 4.12E-15   | -0.8205439 | 2.51E-46   | -0.8145523 | 3.78E-45   |
| 3.26E-69   | 0.39306753 | 3.12E-08   | -0.6931128 | 8.13E-28   | -0.5780578 | 6.96E-18   |
| 6.02E-33   | 0.34346873 | 1.70E-06   | -0.5445934 | 1.12E-15   | -0.4933109 | 9.74E-13   |
| 1.47E-41   | 0.48532536 | 2.53E-12   | -0.7533771 | 3.78E-35   | -0.7666948 | 4.62E-37   |
| 1.11E-26   | -0.2025434 | 0.00569345 | 0.52154642 | 2.70E-14   | 0.71069598 | 9.23E-30   |
| 1.47E-31   | 0.34331428 | 1.72E-06   | -0.5738842 | 1.35E-17   | -0.6159903 | 1.04E-20   |
| 3.13E-27   | 0.251256   | 0.00056101 | -0.5665198 | 4.28E-17   | -0.7124101 | 5.86E-30   |
| 5.45E-53   | -0.3594143 | 5.05E-07   | 0.53219251 | 6.39E-15   | 0.63801578 | 1.56E-22   |
| 0.17941528 | 0.06859143 | 0.35355586 | -0.0211967 | 0.77458368 | -0.0609897 | 0.40954466 |
| 6.20E-44   | 0.57035723 | 2.36E-17   | -0.6965641 | 3.46E-28   | -0.5638024 | 6.50E-17   |

|            |            |            |            |          |            |           |
|------------|------------|------------|------------|----------|------------|-----------|
| 1.26E-47   | 0.36745126 | 2.67E-07   | -0.7599326 | 4.48E-36 | -0.5980724 | 2.50E-19  |
| 7.55E-43   | 0.33569932 | 2.99E-06   | -0.7448542 | 5.47E-34 | -0.5398258 | 2.20E-15  |
| 5.14E-34   | 0.34909587 | 1.12E-06   | -0.5819638 | 3.70E-18 | -0.528184  | 1.11E-14  |
| 8.85E-69   | -0.5515389 | 4.08E-16   | 0.87396958 | 3.01E-59 | 0.74628282 | 3.52E-34  |
| 6.69E-42   | 0.3450612  | 1.51E-06   | -0.5899412 | 9.93E-19 | -0.4798059 | 4.84E-12  |
| 1.85E-41   | 0.42478887 | 1.68E-09   | -0.8122522 | 1.04E-44 | -0.3914145 | 3.61E-08  |
| 1.65E-26   | 0.30481758 | 2.46E-05   | -0.6382968 | 1.47E-22 | -0.3779171 | 1.14E-07  |
| 2.43E-104  | 0.49372957 | 9.26E-13   | -0.8594707 | 3.20E-55 | -0.6229629 | 2.85E-21  |
| 9.41E-52   | 0.31876106 | 9.77E-06   | -0.6906288 | 1.49E-27 | -0.4756177 | 7.84E-12  |
| 3.66E-54   | 0.42081759 | 2.46E-09   | -0.6776985 | 3.19E-26 | -0.5961339 | 3.48E-19  |
| 1.55E-31   | 0.3230683  | 7.28E-06   | -0.680069  | 1.84E-26 | -0.6348233 | 2.92E-22  |
| 1.86E-36   | 0.31993836 | 9.02E-06   | -0.5838794 | 2.71E-18 | -0.3093461 | 1.83E-05  |
| 5.42E-47   | 0.36105474 | 4.44E-07   | -0.6712178 | 1.40E-25 | -0.5731242 | 1.53E-17  |
| 2.38E-46   | 0.32904206 | 4.81E-06   | -0.5642512 | 6.07E-17 | -0.4296778 | 1.04E-09  |
| 1.62E-28   | 0.33828481 | 2.48E-06   | -0.5820757 | 3.63E-18 | -0.6709367 | 1.49E-25  |
| 1.64E-57   | 0.39115789 | 3.69E-08   | -0.8263077 | 1.68E-47 | -0.7137494 | 4.10E-30  |
| 2.14E-37   | 0.43362747 | 7.02E-10   | -0.715932  | 2.28E-30 | -0.6788682 | 2.43E-26  |
| 8.21E-63   | 0.43250188 | 7.85E-10   | -0.8082632 | 5.87E-44 | -0.7026116 | 7.54E-29  |
| 3.92E-44   | 0.45019127 | 1.28E-10   | -0.7822425 | 1.83E-39 | -0.4204388 | 2.55E-09  |
| 3.10E-58   | 0.47428207 | 9.13E-12   | -0.778827  | 6.42E-39 | -0.4573578 | 5.97E-11  |
| 4.66E-34   | 0.56562342 | 4.91E-17   | -0.6638278 | 7.19E-25 | -0.7666285 | 4.72E-37  |
| 9.32E-55   | 0.45643055 | 6.59E-11   | -0.7736864 | 4.06E-38 | -0.6635337 | 7.67E-25  |
| 6.53E-42   | 0.45412956 | 8.44E-11   | -0.7642091 | 1.07E-36 | -0.5610654 | 9.86E-17  |
| 6.23E-57   | -0.446248  | 1.94E-10   | 0.69516378 | 4.90E-28 | 0.47252711 | 1.11E-11  |
| 3.39E-82   | 0.37959286 | 9.88E-08   | -0.7706224 | 1.19E-37 | -0.5844199 | 2.48E-18  |
| 9.40E-62   | 0.39569711 | 2.48E-08   | -0.725754  | 1.52E-31 | -0.5746469 | 1.20E-17  |
| 3.93E-63   | -0.5281511 | 1.11E-14   | 0.78894809 | 1.47E-40 | 0.64077841 | 8.97E-23  |
| 2.14E-27   | 0.23385775 | 0.0013563  | -0.530034  | 8.59E-15 | -0.2824596 | 9.80E-05  |
| 0.00010853 | 0.09293233 | 0.20832895 | -0.2993736 | 3.48E-05 | -0.1729604 | 0.0185555 |
| 2.22E-48   | 0.27924114 | 0.0001185  | -0.6435969 | 5.08E-23 | -0.4347287 | 6.28E-10  |
| 1.31E-44   | 0.23778325 | 0.00111745 | -0.5309981 | 7.53E-15 | -0.3719344 | 1.86E-07  |
| 2.77E-49   | 0.5483658  | 6.49E-16   | -0.8167471 | 1.42E-45 | -0.6319439 | 5.12E-22  |
| 1.30E-45   | 0.3131701  | 1.42E-05   | -0.5980487 | 2.51E-19 | -0.5649359 | 5.46E-17  |
| 9.87E-48   | 0.40727209 | 8.75E-09   | -0.6311662 | 5.96E-22 | -0.4760598 | 7.45E-12  |
| 3.18E-57   | 0.56978005 | 2.58E-17   | -0.8385619 | 3.78E-50 | -0.6964702 | 3.55E-28  |
| 7.30E-40   | 0.20908414 | 0.00428726 | -0.6719594 | 1.18E-25 | -0.5566207 | 1.92E-16  |
| 1.57E-36   | 0.35952538 | 5.01E-07   | -0.7732709 | 4.70E-38 | -0.5341553 | 4.87E-15  |
| 1.79E-44   | 0.53079039 | 7.75E-15   | -0.8337764 | 4.34E-49 | -0.6888051 | 2.32E-27  |
| 2.16E-45   | -0.401519  | 1.48E-08   | 0.68895531 | 2.24E-27 | 0.60124471 | 1.44E-19  |
| 4.00E-43   | 0.19733069 | 0.00709566 | -0.545476  | 9.85E-16 | -0.2941391 | 4.83E-05  |
| 2.15E-28   | 0.11986779 | 0.10412146 | -0.4747934 | 8.61E-12 | -0.3560627 | 6.55E-07  |
| 3.92E-53   | 0.51816211 | 4.22E-14   | -0.7044985 | 4.65E-29 | -0.6329248 | 4.23E-22  |
| 1.69E-73   | 0.49968942 | 4.46E-13   | -0.8599033 | 2.46E-55 | -0.6297812 | 7.78E-22  |
| 6.49E-63   | 0.36839187 | 2.48E-07   | -0.6837283 | 7.80E-27 | -0.5140022 | 7.27E-14  |
| 2.33E-44   | 0.2813157  | 0.00010488 | -0.6292961 | 8.55E-22 | -0.4308653 | 9.24E-10  |
| 1.22E-37   | 0.44433721 | 2.36E-10   | -0.7763745 | 1.56E-38 | -0.664962  | 5.61E-25  |

|            |            |            |            |            |            |            |
|------------|------------|------------|------------|------------|------------|------------|
| 4.13E-55   | 0.40027288 | 1.65E-08   | -0.8830319 | 5.02E-62   | -0.692053  | 1.05E-27   |
| 5.29E-60   | 0.43999046 | 3.69E-10   | -0.7800599 | 4.09E-39   | -0.8236599 | 5.90E-47   |
| 8.94E-47   | 0.30774602 | 2.03E-05   | -0.6200606 | 4.90E-21   | -0.4003053 | 1.65E-08   |
| 9.94E-42   | 0.31296872 | 1.44E-05   | -0.6007263 | 1.58E-19   | -0.4541072 | 8.46E-11   |
| 8.22E-53   | 0.6021744  | 1.23E-19   | -0.7913607 | 5.77E-41   | -0.51838   | 4.10E-14   |
| 1.63E-56   | 0.43968251 | 3.81E-10   | -0.6507577 | 1.17E-23   | -0.4571551 | 6.10E-11   |
| 5.05E-84   | 0.44138277 | 3.20E-10   | -0.8669752 | 3.02E-57   | -0.6545642 | 5.26E-24   |
| 5.53E-56   | 0.3552648  | 6.97E-07   | -0.556703  | 1.90E-16   | -0.4139538 | 4.71E-09   |
| 8.21E-48   | 0.31955614 | 9.26E-06   | -0.5439027 | 1.23E-15   | -0.4276723 | 1.27E-09   |
| 5.18E-45   | 0.52885899 | 1.01E-14   | -0.7572712 | 1.07E-35   | -0.7462968 | 3.51E-34   |
| 2.82E-53   | 0.33546334 | 3.04E-06   | -0.6047382 | 7.83E-20   | -0.6437443 | 4.93E-23   |
| 2.61E-43   | 0.5032835  | 2.85E-13   | -0.6171682 | 8.36E-21   | -0.4332047 | 7.32E-10   |
| 6.75E-61   | 0.42511766 | 1.62E-09   | -0.818136  | 7.56E-46   | -0.6962817 | 3.72E-28   |
| 6.84E-69   | 0.45140228 | 1.13E-10   | -0.807191  | 9.27E-44   | -0.6205023 | 4.51E-21   |
| 1.08E-37   | 0.30468166 | 2.48E-05   | -0.5885132 | 1.26E-18   | -0.4042842 | 1.15E-08   |
| 1.01E-51   | 0.33132491 | 4.09E-06   | -0.7117834 | 6.92E-30   | -0.5110516 | 1.06E-13   |
| 1.12E-95   | 0.51340798 | 7.85E-14   | -0.8588254 | 4.71E-55   | -0.7656405 | 6.61E-37   |
| 1.15E-27   | -0.4367187 | 5.14E-10   | 0.46847848 | 1.76E-11   | 0.67635752 | 4.34E-26   |
| 9.76E-15   | 0.21794071 | 0.00288127 | -0.3717457 | 1.89E-07   | -0.2907584 | 5.94E-05   |
| 4.75E-15   | 0.16520507 | 0.02462302 | -0.3926283 | 3.24E-08   | -0.0871954 | 0.23792216 |
| 2.40E-49   | 0.39290623 | 3.17E-08   | -0.6989424 | 1.91E-28   | -0.4394832 | 3.89E-10   |
| 6.71E-59   | -0.4969843 | 6.22E-13   | 0.81425941 | 4.31E-45   | 0.53173153 | 6.81E-15   |
| 4.19E-15   | 0.33114076 | 4.14E-06   | -0.3744477 | 1.51E-07   | -0.1981398 | 0.0068596  |
| 1.79E-83   | -0.4505016 | 1.24E-10   | 0.85504796 | 4.40E-54   | 0.72382542 | 2.61E-31   |
| 5.96E-71   | 0.49264138 | 1.06E-12   | -0.8015553 | 9.79E-43   | -0.5606644 | 1.05E-16   |
| 7.32E-48   | 0.3957911  | 2.46E-08   | -0.752554  | 4.91E-35   | -0.6180007 | 7.17E-21   |
| 1.83E-55   | 0.41344644 | 4.94E-09   | -0.8185253 | 6.34E-46   | -0.6714626 | 1.32E-25   |
| 2.04E-35   | 0.48304852 | 3.31E-12   | -0.6904171 | 1.57E-27   | -0.7012605 | 1.06E-28   |
| 4.98E-68   | -0.5107087 | 1.11E-13   | 0.80418437 | 3.29E-43   | 0.58278873 | 3.24E-18   |
| 0.00175995 | -0.0331288 | 0.65439184 | -0.2028202 | 0.00562647 | 0.11767031 | 0.11067015 |
| 3.02E-53   | 0.37336029 | 1.66E-07   | -0.5511362 | 4.33E-16   | -0.4615595 | 3.78E-11   |
| 1.73E-45   | 0.41600111 | 3.89E-09   | -0.7151286 | 2.83E-30   | -0.5696727 | 2.62E-17   |
| 1.04E-78   | 0.41369024 | 4.83E-09   | -0.7398523 | 2.50E-33   | -0.6434711 | 5.21E-23   |
| 3.85E-67   | 0.43318131 | 7.34E-10   | -0.7222281 | 4.07E-31   | -0.5770344 | 8.20E-18   |
| 2.25E-36   | 0.42898142 | 1.11E-09   | -0.7910623 | 6.48E-41   | -0.6107397 | 2.69E-20   |
| 1.62E-38   | 0.27897887 | 0.00012034 | -0.6293926 | 8.39E-22   | -0.5291072 | 9.75E-15   |
| 1.27E-40   | 0.45718354 | 6.08E-11   | -0.8163702 | 1.68E-45   | -0.8464485 | 5.67E-52   |
| 2.45E-57   | 0.37485625 | 1.46E-07   | -0.7648357 | 8.69E-37   | -0.4821053 | 3.70E-12   |
| 9.46E-40   | 0.3097132  | 1.79E-05   | -0.576907  | 8.37E-18   | -0.5340847 | 4.92E-15   |
| 3.05E-32   | -0.3534351 | 8.02E-07   | 0.5642488  | 6.07E-17   | 0.75153683 | 6.79E-35   |
| 1.84E-36   | 0.50121866 | 3.69E-13   | -0.6439499 | 4.73E-23   | -0.6621169 | 1.04E-24   |
| 1.29E-56   | 0.48855148 | 1.73E-12   | -0.6779434 | 3.01E-26   | -0.4729363 | 1.06E-11   |
| 3.26E-87   | 0.45663641 | 6.45E-11   | -0.8459641 | 7.39E-52   | -0.6461626 | 3.02E-23   |
| 2.79E-43   | 0.28910411 | 6.58E-05   | -0.6219153 | 3.47E-21   | -0.450652  | 1.22E-10   |
| 4.97E-51   | 0.43251847 | 7.84E-10   | -0.8128004 | 8.20E-45   | -0.7200026 | 7.52E-31   |
| 1.29E-57   | -0.3592468 | 5.12E-07   | 0.7746487  | 2.88E-38   | 0.66639093 | 4.10E-25   |

|          |            |            |            |            |            |            |
|----------|------------|------------|------------|------------|------------|------------|
| 5.94E-47 | 0.42918361 | 1.09E-09   | -0.8331051 | 6.08E-49   | -0.6769643 | 3.78E-26   |
| 1.22E-28 | 0.18691183 | 0.01084867 | -0.4693454 | 1.60E-11   | -0.314131  | 1.33E-05   |
| 5.33E-53 | 0.32935249 | 4.70E-06   | -0.66218   | 1.03E-24   | -0.5442155 | 1.18E-15   |
| 6.25E-43 | -0.5225841 | 2.35E-14   | 0.8432374  | 3.23E-51   | 0.69186991 | 1.10E-27   |
| 8.06E-53 | 0.29522244 | 4.51E-05   | -0.6679982 | 2.87E-25   | -0.376281  | 1.30E-07   |
| 6.58E-47 | 0.41449139 | 4.48E-09   | -0.7887854 | 1.56E-40   | -0.7169348 | 1.74E-30   |
| 6.53E-51 | 0.36692709 | 2.79E-07   | -0.6438625 | 4.82E-23   | -0.4893199 | 1.58E-12   |
| 3.68E-08 | 0.36771065 | 2.62E-07   | -0.2775409 | 0.00013088 | -0.0545857 | 0.46053651 |
| 1.05E-67 | -0.5287809 | 1.02E-14   | 0.83632109 | 1.20E-49   | 0.73875063 | 3.48E-33   |
| 1.52E-25 | 0.26907829 | 0.00021256 | -0.6479769 | 2.08E-23   | -0.2886018 | 6.78E-05   |
| 2.46E-98 | 0.52834703 | 1.08E-14   | -0.7885725 | 1.69E-40   | -0.6406223 | 9.26E-23   |
| 8.93E-47 | 0.52159976 | 2.68E-14   | -0.5858114 | 1.97E-18   | -0.4955394 | 7.43E-13   |
| 2.31E-35 | -0.5149895 | 6.39E-14   | 0.69826718 | 2.26E-28   | 0.78146637 | 2.44E-39   |
| 1.07E-21 | 0.03411677 | 0.64477904 | -0.5106477 | 1.12E-13   | -0.420954  | 2.43E-09   |
| 8.70E-54 | 0.50368264 | 2.71E-13   | -0.7731437 | 4.92E-38   | -0.498754  | 5.00E-13   |
| 2.80E-72 | 0.34532429 | 1.48E-06   | -0.8151591 | 2.89E-45   | -0.5513007 | 4.23E-16   |
| 9.90E-67 | 0.45335465 | 9.16E-11   | -0.7930721 | 2.96E-41   | -0.6178532 | 7.37E-21   |
| 2.03E-63 | 0.33189824 | 3.93E-06   | -0.7195281 | 8.57E-31   | -0.7503364 | 9.92E-35   |
| 6.37E-60 | 0.22425346 | 0.00215004 | -0.5791034 | 5.88E-18   | -0.5132735 | 7.99E-14   |
| 3.98E-46 | 0.24830963 | 0.00065436 | -0.5549499 | 2.47E-16   | -0.4350897 | 6.06E-10   |
| 2.89E-91 | -0.3732837 | 1.67E-07   | 0.73415674 | 1.36E-32   | 0.61601576 | 1.03E-20   |
| 3.26E-33 | 0.51965829 | 3.47E-14   | -0.74005   | 2.36E-33   | -0.7134007 | 4.50E-30   |
| 1.01E-45 | 0.39161774 | 3.54E-08   | -0.6154134 | 1.15E-20   | -0.5661914 | 4.50E-17   |
| 5.72E-54 | 0.46510379 | 2.56E-11   | -0.6015498 | 1.37E-19   | -0.5075997 | 1.65E-13   |
| 8.71E-22 | -0.216131  | 0.00312894 | 0.42489612 | 1.66E-09   | 0.64057838 | 9.34E-23   |
| 7.20E-53 | 0.54389376 | 1.24E-15   | -0.7112206 | 8.04E-30   | -0.4465626 | 1.87E-10   |
| 9.26E-74 | 0.37175115 | 1.89E-07   | -0.6988339 | 1.96E-28   | -0.4286432 | 1.15E-09   |
| 2.75E-40 | 0.44319297 | 2.66E-10   | -0.5838779 | 2.71E-18   | -0.3120179 | 1.54E-05   |
| 5.48E-52 | 0.33392479 | 3.40E-06   | -0.6765189 | 4.18E-26   | -0.5535109 | 3.05E-16   |
| 1.86E-37 | 0.4701208  | 1.46E-11   | -0.6771653 | 3.61E-26   | -0.6613281 | 1.24E-24   |
| 1.55E-64 | 0.48323137 | 3.24E-12   | -0.7977492 | 4.61E-42   | -0.7596377 | 4.94E-36   |
| 1.48E-30 | 0.3767212  | 1.26E-07   | -0.5747276 | 1.18E-17   | -0.4754047 | 8.03E-12   |
| 2.59E-65 | 0.30322045 | 2.72E-05   | -0.7199452 | 7.64E-31   | -0.5545198 | 2.63E-16   |
| 7.36E-64 | 0.47197532 | 1.19E-11   | -0.7915775 | 5.31E-41   | -0.5869169 | 1.64E-18   |
| 2.27E-63 | 0.43777507 | 4.62E-10   | -0.7391154 | 3.12E-33   | -0.6111701 | 2.49E-20   |
| 1.28E-45 | 0.33687734 | 2.75E-06   | -0.5490866 | 5.84E-16   | -0.5104607 | 1.15E-13   |
| 4.55E-24 | 0.15167953 | 0.03930097 | -0.384756  | 6.39E-08   | -0.1320045 | 0.07327208 |
| 8.93E-33 | -0.3629049 | 3.84E-07   | 0.62523588 | 1.85E-21   | 0.60720558 | 5.06E-20   |
| 1.20E-38 | -0.4210617 | 2.40E-09   | 0.72282074 | 3.45E-31   | 0.85149302 | 3.41E-53   |
| 3.45E-24 | -0.4201605 | 2.62E-09   | 0.66268972 | 9.22E-25   | 0.57451173 | 1.23E-17   |
| 6.15E-30 | 0.12943353 | 0.07909729 | -0.4459185 | 2.00E-10   | -0.4123911 | 5.45E-09   |
| 3.20E-46 | 0.31629774 | 1.15E-05   | -0.603166  | 1.03E-19   | -0.5339531 | 5.01E-15   |
| 4.06E-58 | 0.52603689 | 1.48E-14   | -0.6551661 | 4.63E-24   | -0.470339  | 1.43E-11   |
| 2.26E-49 | 0.42562414 | 1.55E-09   | -0.6665248 | 3.98E-25   | -0.4107615 | 6.34E-09   |
| 3.44E-41 | 0.4366015  | 5.21E-10   | -0.503242  | 2.86E-13   | -0.342908  | 1.77E-06   |
| 6.65E-58 | 0.52712836 | 1.28E-14   | -0.7953865 | 1.19E-41   | -0.5790806 | 5.90E-18   |

|          |            |            |            |          |            |            |
|----------|------------|------------|------------|----------|------------|------------|
| 4.29E-57 | 0.39725324 | 2.16E-08   | -0.6042617 | 8.52E-20 | -0.3647811 | 3.31E-07   |
| 4.85E-60 | -0.4252145 | 1.61E-09   | 0.74503469 | 5.18E-34 | 0.80589157 | 1.61E-43   |
| 1.79E-44 | -0.4418366 | 3.06E-10   | 0.62787817 | 1.12E-21 | 0.74654914 | 3.24E-34   |
| 5.77E-52 | 0.52701662 | 1.30E-14   | -0.8596688 | 2.84E-55 | -0.7585145 | 7.14E-36   |
| 3.30E-73 | -0.5527461 | 3.42E-16   | 0.72175611 | 4.63E-31 | 0.58043355 | 4.74E-18   |
| 3.79E-77 | -0.5393459 | 2.36E-15   | 0.69276889 | 8.85E-28 | 0.59850217 | 2.32E-19   |
| 2.30E-46 | -0.315441  | 1.22E-05   | 0.55331109 | 3.14E-16 | 0.66370773 | 7.39E-25   |
| 2.72E-59 | -0.4938485 | 9.13E-13   | 0.84255896 | 4.63E-51 | 0.86097096 | 1.29E-55   |
| 4.56E-63 | 0.50840948 | 1.49E-13   | -0.8773511 | 2.94E-60 | -0.6186684 | 6.34E-21   |
| 3.03E-74 | 0.4470254  | 1.79E-10   | -0.7950095 | 1.38E-41 | -0.628009  | 1.09E-21   |
| 1.69E-35 | 0.28817168 | 6.96E-05   | -0.4640597 | 2.87E-11 | -0.3029351 | 2.77E-05   |
| 1.35E-35 | 0.28299244 | 9.50E-05   | -0.5471788 | 7.71E-16 | -0.4069175 | 9.04E-09   |
| 1.62E-52 | 0.3281896  | 5.10E-06   | -0.6775119 | 3.33E-26 | -0.3580076 | 5.64E-07   |
| 4.70E-51 | 0.37182842 | 1.88E-07   | -0.6509383 | 1.13E-23 | -0.5420585 | 1.61E-15   |
| 1.91E-75 | 0.38317512 | 7.31E-08   | -0.7234656 | 2.88E-31 | -0.5508233 | 4.53E-16   |
| 3.36E-42 | 0.28927852 | 6.51E-05   | -0.527962  | 1.14E-14 | -0.3357726 | 2.98E-06   |
| 1.30E-44 | -0.3854817 | 6.01E-08   | 0.54999834 | 5.12E-16 | 0.79406541 | 2.00E-41   |
| 1.31E-43 | 0.30385353 | 2.61E-05   | -0.5341777 | 4.86E-15 | -0.3960141 | 2.41E-08   |
| 6.23E-26 | 0.33499952 | 3.15E-06   | -0.5461735 | 8.91E-16 | -0.2144544 | 0.00337538 |
| 7.15E-42 | 0.47843325 | 5.67E-12   | -0.690733  | 1.45E-27 | -0.5001319 | 4.22E-13   |
| 4.50E-49 | 0.34683957 | 1.32E-06   | -0.6613925 | 1.22E-24 | -0.4909357 | 1.30E-12   |
| 1.05E-94 | 0.47196692 | 1.19E-11   | -0.8318872 | 1.11E-48 | -0.6722534 | 1.11E-25   |
| 8.28E-17 | 0.24839195 | 0.00065157 | -0.5925894 | 6.36E-19 | -0.4463522 | 1.92E-10   |
| 7.89E-39 | 0.57600389 | 9.66E-18   | -0.7237419 | 2.67E-31 | -0.7532267 | 3.96E-35   |
| 1.28E-51 | 0.29212722 | 5.46E-05   | -0.6818915 | 1.20E-26 | -0.4067341 | 9.19E-09   |
| 2.17E-51 | 0.46222332 | 3.51E-11   | -0.6874887 | 3.18E-27 | -0.7047457 | 4.36E-29   |
| 1.10E-61 | 0.3608003  | 4.53E-07   | -0.694932  | 5.19E-28 | -0.5034555 | 2.79E-13   |
| 1.93E-37 | 0.28139314 | 0.00010441 | -0.5916889 | 7.40E-19 | -0.6129175 | 1.82E-20   |
| 1.56E-21 | 0.18156003 | 0.01338578 | -0.4092826 | 7.27E-09 | -0.095143  | 0.19766301 |
| 6.94E-17 | 0.20235717 | 0.00573893 | -0.4545407 | 8.07E-11 | -0.2081534 | 0.00446612 |
| 8.87E-66 | 0.51534742 | 6.10E-14   | -0.8530909 | 1.37E-53 | -0.6698776 | 1.89E-25   |
| 7.22E-43 | 0.32741806 | 5.38E-06   | -0.5132992 | 7.96E-14 | -0.39863   | 1.91E-08   |
| 1.05E-70 | 0.33051194 | 4.33E-06   | -0.7391753 | 3.07E-33 | -0.5349832 | 4.34E-15   |
| 6.08E-39 | 0.35170435 | 9.15E-07   | -0.5956304 | 3.80E-19 | -0.543219  | 1.36E-15   |
| 4.21E-31 | 0.51023712 | 1.18E-13   | -0.66181   | 1.12E-24 | -0.5659803 | 4.65E-17   |
| 1.01E-74 | 0.45354355 | 8.98E-11   | -0.790945  | 6.78E-41 | -0.6787238 | 2.52E-26   |
| 3.45E-45 | 0.25883215 | 0.00037447 | -0.5365623 | 3.49E-15 | -0.4636319 | 3.01E-11   |
| 2.39E-62 | 0.59788757 | 2.58E-19   | -0.8251823 | 2.87E-47 | -0.8505794 | 5.71E-53   |
| 2.10E-32 | 0.26179703 | 0.00031861 | -0.4311497 | 8.98E-10 | -0.1431207 | 0.05195889 |
| 1.59E-74 | 0.37249581 | 1.78E-07   | -0.7473738 | 2.51E-34 | -0.5143837 | 6.92E-14   |
| 2.11E-60 | 0.49756835 | 5.79E-13   | -0.8077117 | 7.42E-44 | -0.6563715 | 3.59E-24   |
| 1.79E-52 | -0.5067948 | 1.83E-13   | 0.83503458 | 2.30E-49 | 0.83734461 | 7.09E-50   |
| 7.08E-52 | -0.3334506 | 3.52E-06   | 0.56320958 | 7.11E-17 | 0.54316485 | 1.37E-15   |
| 3.29E-55 | 0.37619795 | 1.31E-07   | -0.7025826 | 7.59E-29 | -0.4078063 | 8.33E-09   |
| 3.10E-53 | 0.59798416 | 2.54E-19   | -0.6683915 | 2.63E-25 | -0.6254983 | 1.76E-21   |
| 1.09E-66 | 0.34673177 | 1.33E-06   | -0.6539871 | 5.94E-24 | -0.4900656 | 1.44E-12   |



|            |            |            |            |            |            |            |
|------------|------------|------------|------------|------------|------------|------------|
| 1.04E-46   | 0.29945814 | 3.46E-05   | -0.7784133 | 7.46E-39   | -0.5955809 | 3.83E-19   |
| 2.05E-46   | -0.4890146 | 1.63E-12   | 0.75881968 | 6.46E-36   | 0.73650283 | 6.80E-33   |
| 1.50E-28   | -0.2070006 | 0.00469693 | 0.45828916 | 5.39E-11   | 0.7854451  | 5.55E-40   |
| 8.58E-20   | 0.29517994 | 4.52E-05   | -0.5047963 | 2.36E-13   | -0.1517843 | 0.03916382 |
| 9.78E-52   | 0.46203502 | 3.59E-11   | -0.671454  | 1.32E-25   | -0.4595449 | 4.71E-11   |
| 5.08E-63   | -0.4798887 | 4.79E-12   | 0.77604874 | 1.75E-38   | 0.67113663 | 1.42E-25   |
| 3.22E-63   | 0.4186776  | 3.02E-09   | -0.8664714 | 4.17E-57   | -0.6378299 | 1.61E-22   |
| 1.46E-42   | 0.37606902 | 1.32E-07   | -0.7660222 | 5.81E-37   | -0.6487167 | 1.78E-23   |
| 2.96E-44   | 0.24378095 | 0.0008261  | -0.7340447 | 1.40E-32   | -0.5344445 | 4.68E-15   |
| 2.10E-45   | 0.29986356 | 3.37E-05   | -0.6538625 | 6.10E-24   | -0.424249  | 1.77E-09   |
| 1.48E-55   | 0.50853335 | 1.47E-13   | -0.667179  | 3.44E-25   | -0.4723203 | 1.14E-11   |
| 2.91E-52   | 0.31829942 | 1.01E-05   | -0.7646286 | 9.32E-37   | -0.5804272 | 4.75E-18   |
| 2.52E-50   | 0.32419367 | 6.74E-06   | -0.738384  | 3.89E-33   | -0.3540605 | 7.65E-07   |
| 1.82E-30   | 0.26117622 | 0.00032962 | -0.6114601 | 2.37E-20   | -0.3467671 | 1.33E-06   |
| 1.16E-54   | 0.43124229 | 8.90E-10   | -0.6136104 | 1.60E-20   | -0.4190578 | 2.91E-09   |
| 3.78E-67   | 0.48289816 | 3.37E-12   | -0.8904655 | 1.76E-64   | -0.7600226 | 4.35E-36   |
| 4.76E-49   | 0.36645984 | 2.89E-07   | -0.6440932 | 4.60E-23   | -0.3408881 | 2.05E-06   |
| 9.56E-47   | 0.43407068 | 6.71E-10   | -0.854644  | 5.57E-54   | -0.6103811 | 2.87E-20   |
| 2.51E-37   | 0.42109531 | 2.39E-09   | -0.8447489 | 1.43E-51   | -0.6122748 | 2.04E-20   |
| 4.63E-55   | 0.31297016 | 1.44E-05   | -0.6420858 | 6.90E-23   | -0.5622456 | 8.24E-17   |
| 5.18E-29   | 0.19864056 | 0.00671705 | -0.5146938 | 6.64E-14   | -0.5254612 | 1.60E-14   |
| 5.09E-74   | 0.4788193  | 5.42E-12   | -0.75605   | 1.60E-35   | -0.5540105 | 2.84E-16   |
| 1.27E-51   | 0.2641551  | 0.00027982 | -0.605463  | 6.89E-20   | -0.4015092 | 1.48E-08   |
| 4.61E-16   | 0.28394071 | 8.97E-05   | -0.5005867 | 3.99E-13   | -0.2549447 | 0.00046148 |
| 5.48E-25   | 0.46637338 | 2.22E-11   | -0.5870913 | 1.60E-18   | -0.6421136 | 6.86E-23   |
| 1.49E-36   | 0.35185727 | 9.05E-07   | -0.664896  | 5.69E-25   | -0.4759646 | 7.53E-12   |
| 2.88E-38   | 0.16665611 | 0.02337288 | -0.4739126 | 9.52E-12   | -0.291562  | 5.66E-05   |
| 9.96E-50   | 0.38074051 | 8.98E-08   | -0.8295905 | 3.45E-48   | -0.7249799 | 1.88E-31   |
| 7.97E-53   | 0.43534225 | 5.91E-10   | -0.8437485 | 2.45E-51   | -0.6383768 | 1.45E-22   |
| 9.62E-59   | 0.31940128 | 9.36E-06   | -0.6263167 | 1.51E-21   | -0.6086192 | 3.94E-20   |
| 5.30E-44   | -0.5009643 | 3.81E-13   | 0.79837788 | 3.58E-42   | 0.60969125 | 3.25E-20   |
| 0.00292374 | 0.0404027  | 0.58504227 | -0.0079519 | 0.91445131 | -0.0352755 | 0.63357894 |
| 7.80E-54   | -0.5246554 | 1.78E-14   | 0.88314869 | 4.61E-62   | 0.73236307 | 2.29E-32   |
| 5.74E-68   | -0.4528017 | 9.72E-11   | 0.72528653 | 1.73E-31   | 0.67045493 | 1.66E-25   |
| 1.19E-34   | 0.36965068 | 2.24E-07   | -0.5924638 | 6.50E-19   | -0.6077846 | 4.57E-20   |
| 1.46E-57   | 0.45214109 | 1.04E-10   | -0.8359398 | 1.45E-49   | -0.7427478 | 1.04E-33   |
| 3.60E-14   | 0.1512268  | 0.03989849 | -0.324017  | 6.82E-06   | -0.1370289 | 0.06289327 |
| 1.13E-37   | 0.49425133 | 8.69E-13   | -0.6809999 | 1.48E-26   | -0.6214619 | 3.77E-21   |
| 9.67E-46   | 0.33024207 | 4.42E-06   | -0.7369152 | 6.02E-33   | -0.45149   | 1.12E-10   |
| 3.11E-13   | 0.19227218 | 0.00874233 | -0.4018661 | 1.43E-08   | -0.1650272 | 0.02478013 |
| 0.71636211 | 0.03361079 | 0.649695   | 0.0399516  | 0.58924319 | 0.01065804 | 0.88551107 |
| 1.50E-58   | 0.46119838 | 3.93E-11   | -0.7435859 | 8.08E-34   | -0.6611614 | 1.28E-24   |
| 6.18E-59   | 0.44678513 | 1.83E-10   | -0.8305886 | 2.11E-48   | -0.760566  | 3.63E-36   |
| 5.00E-54   | 0.22335708 | 0.00224239 | -0.6510401 | 1.10E-23   | -0.4641597 | 2.84E-11   |
| 5.54E-47   | 0.53487429 | 4.41E-15   | -0.8243302 | 4.30E-47   | -0.7093563 | 1.31E-29   |
| 1.63E-29   | 0.28393795 | 8.98E-05   | -0.5590966 | 1.33E-16   | -0.2248203 | 0.00209345 |

|            |            |            |            |            |            |            |
|------------|------------|------------|------------|------------|------------|------------|
| 3.49E-24   | 0.41795855 | 3.23E-09   | -0.5164999 | 5.25E-14   | -0.4179009 | 3.25E-09   |
| 1.77E-36   | 0.33037146 | 4.38E-06   | -0.6441746 | 4.52E-23   | -0.6305572 | 6.70E-22   |
| 3.49E-51   | 0.37282439 | 1.73E-07   | -0.6219497 | 3.44E-21   | -0.4634444 | 3.07E-11   |
| 4.66E-91   | 0.42755124 | 1.28E-09   | -0.8492885 | 1.18E-52   | -0.6331946 | 4.02E-22   |
| 2.07E-43   | 0.3235059  | 7.07E-06   | -0.6690473 | 2.27E-25   | -0.4769021 | 6.76E-12   |
| 5.60E-60   | 0.30151493 | 3.04E-05   | -0.6075856 | 4.73E-20   | -0.5524605 | 3.57E-16   |
| 2.95E-56   | -0.3734092 | 1.65E-07   | 0.756367   | 1.44E-35   | 0.62650215 | 1.46E-21   |
| 4.64E-46   | 0.41246272 | 5.41E-09   | -0.7208706 | 5.92E-31   | -0.5558466 | 2.16E-16   |
| 1.74E-62   | 0.44887897 | 1.47E-10   | -0.7808334 | 3.08E-39   | -0.6170514 | 8.54E-21   |
| 1.52E-54   | -0.5096417 | 1.27E-13   | 0.83343782 | 5.14E-49   | 0.67417782 | 7.15E-26   |
| 1.11E-59   | 0.49747968 | 5.86E-13   | -0.5878431 | 1.41E-18   | -0.5882072 | 1.33E-18   |
| 6.26E-59   | -0.3106644 | 1.68E-05   | 0.5976629  | 2.68E-19   | 0.7687313  | 2.29E-37   |
| 4.30E-55   | 0.46500289 | 2.59E-11   | -0.8015051 | 9.99E-43   | -0.5854576 | 2.09E-18   |
| 5.32E-45   | 0.31821299 | 1.01E-05   | -0.5432387 | 1.36E-15   | -0.3247032 | 6.50E-06   |
| 6.15E-43   | 0.4981104  | 5.42E-13   | -0.6464902 | 2.82E-23   | -0.3382258 | 2.49E-06   |
| 9.29E-55   | 0.48660835 | 2.18E-12   | -0.772887  | 5.38E-38   | -0.5864922 | 1.76E-18   |
| 9.01E-59   | 0.32765427 | 5.30E-06   | -0.6338628 | 3.53E-22   | -0.3942371 | 2.82E-08   |
| 0.02794541 | -0.0479738 | 0.51668458 | 0.10050048 | 0.17347007 | 0.03407422 | 0.64519184 |
| 8.13E-16   | 0.42936533 | 1.07E-09   | -0.3984655 | 1.94E-08   | -0.4044829 | 1.13E-08   |
| 1.62E-49   | 0.40961437 | 7.05E-09   | -0.6776236 | 3.24E-26   | -0.4113569 | 6.00E-09   |
| 1.15E-50   | 0.51284108 | 8.45E-14   | -0.7697181 | 1.63E-37   | -0.6155696 | 1.12E-20   |
| 7.07E-48   | 0.44375955 | 2.51E-10   | -0.7576156 | 9.59E-36   | -0.6817861 | 1.23E-26   |
| 2.96E-44   | 0.29993886 | 3.36E-05   | -0.7614925 | 2.67E-36   | -0.682816  | 9.67E-27   |
| 1.45E-46   | 0.30836648 | 1.95E-05   | -0.7102623 | 1.04E-29   | -0.5159023 | 5.68E-14   |
| 9.60E-49   | -0.5441123 | 1.20E-15   | 0.78141748 | 2.49E-39   | 0.69527691 | 4.77E-28   |
| 9.38E-32   | 0.32380276 | 6.92E-06   | -0.5255517 | 1.58E-14   | -0.3592065 | 5.13E-07   |
| 1.16E-37   | 0.46862689 | 1.73E-11   | -0.5585191 | 1.45E-16   | -0.393156  | 3.10E-08   |
| 5.19E-50   | 0.38246345 | 7.77E-08   | -0.6777611 | 3.14E-26   | -0.3962847 | 2.35E-08   |
| 2.88E-32   | 0.23070896 | 0.0015807  | -0.632877  | 4.27E-22   | -0.6701201 | 1.79E-25   |
| 1.62E-54   | 0.41800133 | 3.22E-09   | -0.8475187 | 3.15E-52   | -0.8039207 | 3.67E-43   |
| 3.23E-42   | 0.48196981 | 3.76E-12   | -0.8320689 | 1.02E-48   | -0.7872768 | 2.77E-40   |
| 5.84E-16   | 0.19855201 | 0.00674206 | -0.4227577 | 2.04E-09   | -0.2504776 | 0.0005844  |
| 2.03E-36   | 0.21011385 | 0.0040969  | -0.504728  | 2.38E-13   | -0.2859543 | 7.96E-05   |
| 9.81E-65   | 0.49872737 | 5.02E-13   | -0.6858308 | 4.73E-27   | -0.5773939 | 7.74E-18   |
| 1.71E-62   | 0.36873385 | 2.41E-07   | -0.6913588 | 1.25E-27   | -0.3775688 | 1.17E-07   |
| 3.19E-45   | 0.42180116 | 2.24E-09   | -0.6967959 | 3.27E-28   | -0.564429  | 5.90E-17   |
| 1.93E-55   | 0.58631998 | 1.81E-18   | -0.6985033 | 2.13E-28   | -0.5068322 | 1.82E-13   |
| 4.74E-42   | -0.2332537 | 0.00139694 | 0.54783578 | 7.01E-16   | 0.25805555 | 0.00039053 |
| 1.26E-45   | 0.37249811 | 1.78E-07   | -0.665781  | 4.69E-25   | -0.5541188 | 2.79E-16   |
| 2.31E-37   | 0.45510075 | 7.60E-11   | -0.6249077 | 1.97E-21   | -0.267863  | 0.0002276  |
| 2.16E-58   | 0.27899481 | 0.00012023 | -0.6840296 | 7.26E-27   | -0.5323689 | 6.24E-15   |
| 7.65E-70   | 0.44397594 | 2.45E-10   | -0.776091  | 1.72E-38   | -0.5216533 | 2.66E-14   |
| 3.32E-51   | 0.22940559 | 0.00168313 | -0.5559246 | 2.13E-16   | -0.3773952 | 1.19E-07   |
| 2.58E-65   | 0.48884987 | 1.67E-12   | -0.8230675 | 7.79E-47   | -0.5808099 | 4.46E-18   |
| 3.22E-49   | 0.29919152 | 3.52E-05   | -0.7288667 | 6.26E-32   | -0.3991689 | 1.82E-08   |
| 9.05E-40   | 0.38842757 | 4.67E-08   | -0.7576351 | 9.53E-36   | -0.7157138 | 2.42E-30   |

|            |            |            |            |            |            |            |
|------------|------------|------------|------------|------------|------------|------------|
| 8.92E-36   | 0.26890788 | 0.00021462 | -0.6791416 | 2.28E-26   | -0.4611749 | 3.94E-11   |
| 2.30E-60   | 0.40178315 | 1.44E-08   | -0.6705199 | 1.63E-25   | -0.676821  | 3.90E-26   |
| 0.37295037 | 0.03503204 | 0.63592565 | 0.04667934 | 0.52807424 | -0.0146243 | 0.84337822 |
| 1.63E-35   | 0.36867596 | 2.42E-07   | -0.6689549 | 2.32E-25   | -0.7798357 | 4.44E-39   |
| 2.30E-40   | 0.56970973 | 2.61E-17   | -0.7745784 | 2.96E-38   | -0.7920742 | 4.37E-41   |
| 3.18E-30   | 0.40791523 | 8.25E-09   | -0.6136459 | 1.59E-20   | -0.6577037 | 2.70E-24   |
| 2.23E-62   | -0.4719276 | 1.19E-11   | 0.87014411 | 3.87E-58   | 0.77607868 | 1.73E-38   |
| 9.02E-43   | 0.37212573 | 1.83E-07   | -0.7580016 | 8.45E-36   | -0.7454483 | 4.56E-34   |
| 3.47E-42   | 0.38651486 | 5.50E-08   | -0.7703797 | 1.30E-37   | -0.6335647 | 3.74E-22   |
| 1.61E-64   | 0.41527491 | 4.16E-09   | -0.7920728 | 4.37E-41   | -0.6173794 | 8.04E-21   |
| 1.07E-42   | 0.34670883 | 1.33E-06   | -0.6335794 | 3.73E-22   | -0.5697801 | 2.58E-17   |
| 2.12E-35   | 0.30568998 | 2.32E-05   | -0.5506486 | 4.65E-16   | -0.4780062 | 5.95E-12   |
| 2.86E-24   | 0.24901671 | 0.00063074 | -0.5208726 | 2.95E-14   | -0.1976013 | 0.00701591 |
| 4.70E-57   | 0.4931621  | 9.92E-13   | -0.8771206 | 3.45E-60   | -0.8020602 | 7.95E-43   |
| 1.91E-37   | 0.32329856 | 7.17E-06   | -0.6564964 | 3.50E-24   | -0.4888741 | 1.66E-12   |
| 1.22E-53   | 0.23645805 | 0.00119339 | -0.606412  | 5.83E-20   | -0.4380431 | 4.50E-10   |
| 3.78E-41   | 0.40015148 | 1.67E-08   | -0.7980756 | 4.04E-42   | -0.6880638 | 2.77E-27   |
| 7.63E-50   | 0.35629676 | 6.44E-07   | -0.6961422 | 3.85E-28   | -0.6293568 | 8.45E-22   |
| 1.01E-68   | 0.37150133 | 1.93E-07   | -0.7267461 | 1.15E-31   | -0.5738332 | 1.36E-17   |
| 5.35E-64   | 0.34330119 | 1.72E-06   | -0.7329939 | 1.90E-32   | -0.5906705 | 8.79E-19   |
| 5.81E-36   | 0.38397839 | 6.83E-08   | -0.5665149 | 4.28E-17   | -0.2328771 | 0.00142285 |
| 2.72E-50   | 0.39415805 | 2.84E-08   | -0.7184746 | 1.14E-30   | -0.795441  | 1.16E-41   |
| 4.51E-61   | 0.39718039 | 2.17E-08   | -0.7248954 | 1.93E-31   | -0.6152709 | 1.18E-20   |
| 8.54E-49   | 0.42665742 | 1.40E-09   | -0.7555589 | 1.87E-35   | -0.4433068 | 2.63E-10   |
| 2.87E-58   | -0.3736265 | 1.62E-07   | 0.7091296  | 1.39E-29   | 0.54698909 | 7.92E-16   |
| 5.08E-53   | 0.34609212 | 1.40E-06   | -0.5832042 | 3.02E-18   | -0.4852878 | 2.54E-12   |
| 1.03E-52   | -0.5129582 | 8.32E-14   | 0.69845632 | 2.16E-28   | 0.46282329 | 3.29E-11   |
| 1.02E-34   | 0.3119076  | 1.55E-05   | -0.7292842 | 5.56E-32   | -0.7757523 | 1.95E-38   |
| 7.10E-22   | 0.26150027 | 0.00032383 | -0.5163739 | 5.34E-14   | -0.2175991 | 0.00292661 |
| 1.99E-57   | 0.26582924 | 0.000255   | -0.6278447 | 1.13E-21   | -0.5142486 | 7.04E-14   |
| 1.16E-42   | 0.50554963 | 2.14E-13   | -0.7309191 | 3.47E-32   | -0.6594731 | 1.85E-24   |
| 7.48E-29   | 0.22461299 | 0.00211399 | -0.4514269 | 1.12E-10   | -0.3516933 | 9.16E-07   |
| 7.69E-37   | 0.45878281 | 5.11E-11   | -0.6543199 | 5.54E-24   | -0.771615  | 8.41E-38   |
| 5.97E-36   | 0.33572288 | 2.99E-06   | -0.5275036 | 1.21E-14   | -0.4403658 | 3.55E-10   |
| 1.57E-44   | 0.41339781 | 4.96E-09   | -0.5835559 | 2.85E-18   | -0.2665744 | 0.00024462 |
| 5.49E-35   | 0.2872677  | 7.35E-05   | -0.6840576 | 7.21E-27   | -0.612532  | 1.95E-20   |
| 5.49E-51   | 0.36536099 | 3.16E-07   | -0.61447   | 1.37E-20   | -0.3573974 | 5.91E-07   |
| 1.11E-28   | 0.36661386 | 2.86E-07   | -0.464952  | 2.60E-11   | -0.3338479 | 3.42E-06   |
| 6.15E-63   | 0.53981296 | 2.21E-15   | -0.763534  | 1.35E-36   | -0.544289  | 1.17E-15   |
| 2.45E-56   | -0.3466755 | 1.34E-06   | 0.71728741 | 1.58E-30   | 0.70940363 | 1.30E-29   |
| 5.34E-29   | 0.24133482 | 0.00093525 | -0.4286249 | 1.15E-09   | -0.2503002 | 0.00058985 |
| 6.09E-87   | 0.53001612 | 8.62E-15   | -0.7793641 | 5.28E-39   | -0.6485722 | 1.84E-23   |
| 1.08E-45   | 0.39639312 | 2.33E-08   | -0.6175183 | 7.84E-21   | -0.3853405 | 6.08E-08   |
| 3.09E-26   | 0.62681937 | 1.37E-21   | -0.5385293 | 2.65E-15   | -0.5316553 | 6.88E-15   |
| 3.34E-55   | 0.50034991 | 4.11E-13   | -0.7178321 | 1.36E-30   | -0.4187661 | 2.99E-09   |
| 2.87E-11   | 0.2294401  | 0.00168034 | -0.4311483 | 8.98E-10   | -0.0552521 | 0.45507159 |

|            |            |            |            |            |            |            |
|------------|------------|------------|------------|------------|------------|------------|
| 1.32E-46   | -0.4593874 | 4.79E-11   | 0.59572858 | 3.73E-19   | 0.78134531 | 2.55E-39   |
| 0.23975588 | 0.03635137 | 0.62325434 | 0.06179893 | 0.40334722 | -0.0339071 | 0.64681377 |
| 3.35E-32   | 0.35676201 | 6.21E-07   | -0.5908988 | 8.46E-19   | -0.3244435 | 6.62E-06   |
| 1.05E-47   | -0.5734211 | 1.46E-17   | 0.84861152 | 1.72E-52   | 0.80019453 | 1.71E-42   |
| 9.06E-34   | 0.34978467 | 1.06E-06   | -0.703435  | 6.11E-29   | -0.7039101 | 5.41E-29   |
| 8.25E-34   | 0.33355522 | 3.49E-06   | -0.6446643 | 4.09E-23   | -0.7366612 | 6.49E-33   |
| 1.87E-41   | 0.39054609 | 3.89E-08   | -0.687046  | 3.54E-27   | -0.3903665 | 3.95E-08   |
| 9.28E-27   | 0.26943887 | 0.00020828 | -0.5073548 | 1.71E-13   | -0.4525194 | 1.00E-10   |
| 2.84E-57   | 0.61288428 | 1.83E-20   | -0.8454884 | 9.58E-52   | -0.6507127 | 1.18E-23   |
| 3.72E-22   | 0.29477016 | 4.64E-05   | -0.487817  | 1.89E-12   | -0.4554329 | 7.34E-11   |
| 3.72E-41   | 0.41638582 | 3.75E-09   | -0.6383818 | 1.45E-22   | -0.5601772 | 1.13E-16   |
| 5.65E-43   | 0.53656853 | 3.48E-15   | -0.7509145 | 8.27E-35   | -0.6663741 | 4.11E-25   |
| 6.91E-47   | 0.39436804 | 2.79E-08   | -0.771529  | 8.67E-38   | -0.6217522 | 3.57E-21   |
| 3.66E-64   | 0.50105482 | 3.76E-13   | -0.6874487 | 3.22E-27   | -0.7322687 | 2.35E-32   |
| 5.68E-38   | 0.25039209 | 0.00058702 | -0.6068039 | 5.44E-20   | -0.5677264 | 3.55E-17   |
| 4.23E-75   | -0.511356  | 1.02E-13   | 0.85143939 | 3.51E-53   | 0.8310788  | 1.66E-48   |
| 1.54E-39   | 0.40125501 | 1.51E-08   | -0.7270795 | 1.04E-31   | -0.6833981 | 8.43E-27   |
| 1.06E-10   | 0.38803869 | 4.83E-08   | -0.3632328 | 3.74E-07   | -0.0270509 | 0.714734   |
| 8.47E-34   | 0.16583575 | 0.02407277 | -0.5379073 | 2.89E-15   | -0.3626952 | 3.90E-07   |
| 1.48E-61   | 0.40733437 | 8.70E-09   | -0.8668752 | 3.22E-57   | -0.823724  | 5.72E-47   |
| 1.38E-56   | 0.39896832 | 1.85E-08   | -0.5987083 | 2.24E-19   | -0.5584956 | 1.45E-16   |
| 2.43E-25   | 0.32110387 | 8.33E-06   | -0.5102452 | 1.18E-13   | -0.260935  | 0.000334   |
| 1.19E-58   | 0.45363248 | 8.90E-11   | -0.8290788 | 4.42E-48   | -0.7194595 | 8.73E-31   |
| 5.44E-64   | 0.40427383 | 1.15E-08   | -0.7921767 | 4.20E-41   | -0.5647366 | 5.63E-17   |
| 2.35E-42   | 0.28262103 | 9.71E-05   | -0.5412879 | 1.79E-15   | -0.4386234 | 4.24E-10   |
| 3.63E-44   | 0.31236048 | 1.50E-05   | -0.619815  | 5.13E-21   | -0.3882129 | 4.76E-08   |
| 2.92E-55   | 0.51055956 | 1.13E-13   | -0.870306  | 3.48E-58   | -0.5082243 | 1.53E-13   |
| 5.53E-70   | 0.32176228 | 7.96E-06   | -0.6918721 | 1.10E-27   | -0.4960421 | 6.98E-13   |
| 2.57E-60   | 0.3572949  | 5.96E-07   | -0.7156266 | 2.48E-30   | -0.5597774 | 1.20E-16   |
| 3.15E-79   | 0.41947018 | 2.80E-09   | -0.7185866 | 1.11E-30   | -0.6400108 | 1.05E-22   |
| 1.55E-49   | 0.49613531 | 6.90E-13   | -0.7904484 | 8.22E-41   | -0.6613485 | 1.23E-24   |
| 2.98E-59   | 0.57230796 | 1.74E-17   | -0.8428213 | 4.03E-51   | -0.6685787 | 2.52E-25   |
| 9.47E-77   | -0.3623948 | 4.00E-07   | 0.68632505 | 4.21E-27   | 0.54265904 | 1.48E-15   |
| 1.35E-17   | 0.10659764 | 0.14868957 | -0.4131299 | 5.09E-09   | -0.1557944 | 0.03420742 |
| 5.69E-73   | 0.44040946 | 3.54E-10   | -0.7145481 | 3.31E-30   | -0.5190836 | 3.74E-14   |
| 3.69E-76   | 0.41925031 | 2.86E-09   | -0.7828639 | 1.46E-39   | -0.5968632 | 3.08E-19   |
| 0.99579105 | 0.0186417  | 0.80115094 | 0.08626187 | 0.24300308 | 0.06173389 | 0.40384325 |
| 1.01E-55   | 0.46752235 | 1.96E-11   | -0.7201183 | 7.28E-31   | -0.7185741 | 1.11E-30   |
| 3.47E-62   | 0.35388214 | 7.75E-07   | -0.6143174 | 1.41E-20   | -0.4642997 | 2.80E-11   |
| 6.72E-62   | 0.48756795 | 1.94E-12   | -0.8500745 | 7.59E-53   | -0.7355968 | 8.88E-33   |
| 7.61E-44   | 0.47678967 | 6.85E-12   | -0.7883104 | 1.87E-40   | -0.6449118 | 3.89E-23   |
| 4.05E-57   | 0.28141455 | 0.00010427 | -0.7226176 | 3.65E-31   | -0.5358283 | 3.86E-15   |
| 2.70E-31   | 0.3560461  | 6.56E-07   | -0.5067495 | 1.84E-13   | -0.3259463 | 5.97E-06   |
| 7.34E-30   | -0.2381089 | 0.00109948 | 0.67083205 | 1.52E-25   | 0.8535036  | 1.08E-53   |
| 3.31E-45   | 0.36482627 | 3.30E-07   | -0.6592941 | 1.92E-24   | -0.5451906 | 1.03E-15   |
| 1.24E-70   | 0.45247179 | 1.01E-10   | -0.7805713 | 3.39E-39   | -0.4836202 | 3.10E-12   |

|          |            |            |            |            |            |            |
|----------|------------|------------|------------|------------|------------|------------|
| 1.43E-60 | 0.38813278 | 4.79E-08   | -0.7227325 | 3.53E-31   | -0.47146   | 1.26E-11   |
| 1.53E-56 | 0.32252401 | 7.56E-06   | -0.6683273 | 2.67E-25   | -0.4557992 | 7.06E-11   |
| 5.38E-39 | -0.4519071 | 1.07E-10   | 0.67386276 | 7.68E-26   | 0.83102933 | 1.70E-48   |
| 3.97E-66 | 0.41615021 | 3.83E-09   | -0.7120666 | 6.42E-30   | -0.5032909 | 2.85E-13   |
| 4.65E-48 | 0.4241806  | 1.78E-09   | -0.8304104 | 2.31E-48   | -0.5486169 | 6.26E-16   |
| 9.69E-67 | 0.62638427 | 1.49E-21   | -0.877127  | 3.44E-60   | -0.5829592 | 3.15E-18   |
| 3.27E-57 | 0.48410887 | 2.92E-12   | -0.7809553 | 2.95E-39   | -0.5551324 | 2.40E-16   |
| 3.82E-45 | 0.295133   | 4.54E-05   | -0.6800346 | 1.86E-26   | -0.6584235 | 2.32E-24   |
| 1.58E-44 | 0.33410529 | 3.36E-06   | -0.5636201 | 6.68E-17   | -0.4124505 | 5.42E-09   |
| 5.61E-28 | -0.3828006 | 7.55E-08   | 0.65620116 | 3.72E-24   | 0.69150431 | 1.21E-27   |
| 3.33E-62 | 0.4852888  | 2.54E-12   | -0.7897133 | 1.09E-40   | -0.6173676 | 8.06E-21   |
| 3.15E-77 | 0.54407655 | 1.20E-15   | -0.8096581 | 3.22E-44   | -0.6141206 | 1.46E-20   |
| 9.13E-77 | 0.4537214  | 8.81E-11   | -0.8320093 | 1.05E-48   | -0.6311017 | 6.03E-22   |
| 2.54E-69 | 0.4560584  | 6.86E-11   | -0.8931792 | 2.01E-65   | -0.5705092 | 2.30E-17   |
| 2.54E-41 | -0.3383275 | 2.47E-06   | 0.67933632 | 2.18E-26   | 0.85874612 | 4.94E-55   |
| 3.82E-74 | 0.43189038 | 8.34E-10   | -0.7929907 | 3.05E-41   | -0.6239837 | 2.35E-21   |
| 6.26E-78 | 0.37082042 | 2.04E-07   | -0.7364885 | 6.83E-33   | -0.5912328 | 7.99E-19   |
| 4.85E-58 | 0.4303317  | 9.74E-10   | -0.7838262 | 1.02E-39   | -0.5779121 | 7.12E-18   |
| 7.01E-49 | 0.68288422 | 9.52E-27   | -0.8239775 | 5.08E-47   | -0.5478862 | 6.96E-16   |
| 2.98E-69 | 0.36035037 | 4.69E-07   | -0.754625  | 2.53E-35   | -0.5976862 | 2.67E-19   |
| 3.61E-52 | 0.61164667 | 2.29E-20   | -0.7768571 | 1.31E-38   | -0.692148  | 1.03E-27   |
| 2.49E-11 | -0.0718541 | 0.33107306 | -0.0028775 | 0.96899206 | -0.0080937 | 0.9129315  |
| 5.58E-48 | 0.3841311  | 6.74E-08   | -0.6932291 | 7.90E-28   | -0.6207773 | 4.29E-21   |
| 3.47E-54 | 0.44932127 | 1.40E-10   | -0.8229723 | 8.14E-47   | -0.6970967 | 3.03E-28   |
| 9.26E-85 | -0.4966254 | 6.50E-13   | 0.77814924 | 8.21E-39   | 0.58363104 | 2.82E-18   |
| 3.76E-59 | 0.3278436  | 5.23E-06   | -0.7611167 | 3.02E-36   | -0.6037048 | 9.40E-20   |
| 9.41E-54 | 0.42000038 | 2.66E-09   | -0.6394872 | 1.16E-22   | -0.500107  | 4.23E-13   |
| 1.21E-57 | 0.42484593 | 1.67E-09   | -0.7293382 | 5.47E-32   | -0.6363274 | 2.17E-22   |
| 2.13E-32 | 0.32722917 | 5.46E-06   | -0.659524  | 1.83E-24   | -0.5030426 | 2.94E-13   |
| 2.23E-52 | 0.30782459 | 2.02E-05   | -0.6307232 | 6.49E-22   | -0.5078214 | 1.61E-13   |
| 6.48E-41 | -0.4910228 | 1.28E-12   | 0.75850499 | 7.16E-36   | 0.62797669 | 1.10E-21   |
| 2.62E-92 | 0.5112829  | 1.03E-13   | -0.8631427 | 3.38E-56   | -0.6485339 | 1.85E-23   |
| 2.74E-12 | 0.24396682 | 0.0008183  | -0.4022934 | 1.38E-08   | -0.2685001 | 0.0002196  |
| 6.21E-61 | 0.35229423 | 8.75E-07   | -0.6365296 | 2.09E-22   | -0.5462101 | 8.87E-16   |
| 1.43E-32 | 0.29929935 | 3.49E-05   | -0.5607774 | 1.03E-16   | -0.1590383 | 0.03059708 |
| 1.33E-71 | 0.53437667 | 4.73E-15   | -0.8471746 | 3.81E-52   | -0.6259578 | 1.62E-21   |
| 1.11E-70 | 0.51125538 | 1.04E-13   | -0.8375448 | 6.40E-50   | -0.5585609 | 1.44E-16   |
| 3.81E-46 | 0.40937768 | 7.21E-09   | -0.7378124 | 4.61E-33   | -0.6793759 | 2.16E-26   |
| 2.06E-56 | 0.4589434  | 5.03E-11   | -0.6768567 | 3.87E-26   | -0.4148961 | 4.31E-09   |
| 3.47E-57 | 0.35114542 | 9.55E-07   | -0.6755069 | 5.28E-26   | -0.5377608 | 2.95E-15   |
| 1.14E-49 | 0.39430729 | 2.80E-08   | -0.7313809 | 3.04E-32   | -0.671525  | 1.30E-25   |
| 4.97E-56 | 0.54252769 | 1.50E-15   | -0.8786913 | 1.15E-60   | -0.7284718 | 7.01E-32   |
| 2.44E-61 | 0.44853057 | 1.53E-10   | -0.7425786 | 1.10E-33   | -0.5089499 | 1.39E-13   |
| 2.25E-48 | 0.40283023 | 1.31E-08   | -0.709516  | 1.26E-29   | -0.4755063 | 7.94E-12   |
| 2.26E-55 | 0.5116241  | 9.88E-14   | -0.6910361 | 1.35E-27   | -0.3718318 | 1.88E-07   |
| 2.69E-60 | 0.38658634 | 5.47E-08   | -0.6157014 | 1.09E-20   | -0.4958696 | 7.13E-13   |

|          |            |            |            |          |            |            |
|----------|------------|------------|------------|----------|------------|------------|
| 3.70E-76 | 0.61596769 | 1.04E-20   | -0.8532713 | 1.23E-53 | -0.6768386 | 3.89E-26   |
| 1.27E-56 | 0.41617788 | 3.82E-09   | -0.6825765 | 1.02E-26 | -0.6501117 | 1.34E-23   |
| 3.19E-44 | 0.34564364 | 1.44E-06   | -0.6522803 | 8.51E-24 | -0.4970462 | 6.18E-13   |
| 1.39E-21 | 0.28446253 | 8.70E-05   | -0.5419061 | 1.64E-15 | -0.5151812 | 6.24E-14   |
| 1.33E-49 | 0.42124905 | 2.36E-09   | -0.7775432 | 1.02E-38 | -0.4358352 | 5.62E-10   |
| 1.17E-63 | 0.41041856 | 6.55E-09   | -0.6606328 | 1.44E-24 | -0.4555844 | 7.22E-11   |
| 1.48E-12 | 0.28680191 | 7.56E-05   | -0.4810744 | 4.17E-12 | -0.1691425 | 0.02135763 |
| 9.43E-63 | 0.43336235 | 7.21E-10   | -0.799833  | 1.98E-42 | -0.6569468 | 3.18E-24   |
| 1.60E-48 | 0.43442065 | 6.48E-10   | -0.7504827 | 9.48E-35 | -0.774634  | 2.90E-38   |
| 2.58E-62 | 0.41878771 | 2.98E-09   | -0.799966  | 1.88E-42 | -0.6708233 | 1.53E-25   |
| 3.51E-32 | 0.18483274 | 0.01177898 | -0.5054497 | 2.17E-13 | -0.214687  | 0.00334018 |
| 1.15E-47 | 0.40356003 | 1.23E-08   | -0.6856053 | 5.00E-27 | -0.5791403 | 5.85E-18   |
| 4.24E-54 | 0.51260122 | 8.71E-14   | -0.6360464 | 2.30E-22 | -0.4541257 | 8.44E-11   |
| 2.85E-72 | 0.46133922 | 3.87E-11   | -0.7236555 | 2.73E-31 | -0.5723535 | 1.72E-17   |
| 2.29E-31 | 0.41738829 | 3.41E-09   | -0.7996387 | 2.14E-42 | -0.51844   | 4.07E-14   |
| 1.16E-34 | 0.31730259 | 1.08E-05   | -0.6183993 | 6.66E-21 | -0.3415728 | 1.95E-06   |
| 3.80E-43 | 0.38751802 | 5.05E-08   | -0.6707065 | 1.57E-25 | -0.5844926 | 2.45E-18   |
| 3.99E-31 | -0.3787403 | 1.06E-07   | 0.73119817 | 3.21E-32 | 0.57090103 | 2.17E-17   |
| 5.69E-52 | 0.58240247 | 3.45E-18   | -0.7446634 | 5.80E-34 | -0.7039954 | 5.29E-29   |
| 1.71E-47 | 0.5606148  | 1.06E-16   | -0.7944247 | 1.74E-41 | -0.6914923 | 1.21E-27   |
| 5.76E-40 | 0.53158104 | 6.95E-15   | -0.7369497 | 5.95E-33 | -0.5165596 | 5.21E-14   |
| 5.97E-63 | 0.35043035 | 1.01E-06   | -0.667609  | 3.13E-25 | -0.5385201 | 2.65E-15   |
| 4.83E-35 | 0.36582147 | 3.05E-07   | -0.5837992 | 2.74E-18 | -0.5583332 | 1.49E-16   |
| 5.29E-67 | -0.5348371 | 4.43E-15   | 0.87209829 | 1.06E-58 | 0.61142329 | 2.38E-20   |
| 8.42E-65 | 0.44501759 | 2.20E-10   | -0.7949049 | 1.44E-41 | -0.5592909 | 1.29E-16   |
| 1.54E-49 | 0.3697765  | 2.22E-07   | -0.7656133 | 6.67E-37 | -0.7323027 | 2.33E-32   |
| 4.53E-42 | 0.49444711 | 8.48E-13   | -0.7500206 | 1.10E-34 | -0.4993247 | 4.66E-13   |
| 1.79E-46 | 0.17686584 | 0.01602489 | -0.5263103 | 1.43E-14 | -0.5119116 | 9.52E-14   |
| 9.81E-24 | 0.25470765 | 0.00046735 | -0.4554169 | 7.35E-11 | -0.3649723 | 3.26E-07   |
| 1.09E-48 | -0.4233324 | 1.93E-09   | 0.59148372 | 7.66E-19 | 0.65049417 | 1.23E-23   |
| 5.47E-45 | 0.45796907 | 5.58E-11   | -0.8133782 | 6.36E-45 | -0.6615138 | 1.19E-24   |
| 5.03E-49 | 0.26870129 | 0.00021713 | -0.6240187 | 2.33E-21 | -0.3691657 | 2.33E-07   |
| 5.15E-58 | 0.53831134 | 2.73E-15   | -0.8164606 | 1.61E-45 | -0.5951221 | 4.14E-19   |
| 9.44E-39 | 0.30105639 | 3.13E-05   | -0.5542008 | 2.76E-16 | -0.4294238 | 1.06E-09   |
| 3.01E-72 | 0.45884816 | 5.08E-11   | -0.6432783 | 5.42E-23 | -0.6281298 | 1.07E-21   |
| 5.98E-57 | 0.2682246  | 0.00022303 | -0.6051491 | 7.29E-20 | -0.3345834 | 3.24E-06   |
| 2.71E-21 | 0.36582104 | 3.05E-07   | -0.5486763 | 6.20E-16 | -0.5555547 | 2.26E-16   |
| 2.87E-36 | 0.37020394 | 2.14E-07   | -0.5945403 | 4.57E-19 | -0.4429178 | 2.73E-10   |
| 3.36E-33 | 0.31902281 | 9.60E-06   | -0.7002311 | 1.38E-28 | -0.6376588 | 1.67E-22   |
| 1.60E-37 | 0.33677336 | 2.77E-06   | -0.6006249 | 1.61E-19 | -0.5184023 | 4.09E-14   |
| 4.38E-30 | 0.34425244 | 1.60E-06   | -0.5576703 | 1.64E-16 | -0.5164557 | 5.28E-14   |
| 1.57E-67 | -0.4874404 | 1.97E-12   | 0.85870766 | 5.06E-55 | 0.72515192 | 1.80E-31   |
| 8.13E-47 | 0.58517998 | 2.19E-18   | -0.8417824 | 7.00E-51 | -0.7267056 | 1.16E-31   |
| 1.46E-27 | 0.07666938 | 0.29960732 | -0.4489851 | 1.45E-10 | -0.1587344 | 0.03092086 |
| 1.68E-44 | 0.38372257 | 6.98E-08   | -0.7325987 | 2.14E-32 | -0.6258459 | 1.65E-21   |
| 2.37E-50 | 0.40408684 | 1.17E-08   | -0.8535946 | 1.02E-53 | -0.7750507 | 2.50E-38   |

|          |            |            |            |          |            |            |
|----------|------------|------------|------------|----------|------------|------------|
| 3.00E-50 | -0.5642156 | 6.10E-17   | 0.84735349 | 3.45E-52 | 0.6309606  | 6.20E-22   |
| 6.51E-31 | -0.4261482 | 1.47E-09   | 0.64029506 | 9.88E-23 | 0.68640682 | 4.13E-27   |
| 8.54E-49 | 0.39389823 | 2.90E-08   | -0.5971947 | 2.91E-19 | -0.4504842 | 1.24E-10   |
| 2.00E-73 | 0.44275838 | 2.78E-10   | -0.7836271 | 1.10E-39 | -0.442428  | 2.88E-10   |
| 2.28E-47 | 0.37384345 | 1.59E-07   | -0.696373  | 3.63E-28 | -0.4386258 | 4.24E-10   |
| 4.33E-65 | 0.36089322 | 4.50E-07   | -0.7344074 | 1.26E-32 | -0.5216155 | 2.67E-14   |
| 7.24E-71 | 0.48989295 | 1.47E-12   | -0.8601718 | 2.09E-55 | -0.5766218 | 8.76E-18   |
| 9.02E-37 | 0.29298002 | 5.19E-05   | -0.4738067 | 9.64E-12 | -0.3549365 | 7.15E-07   |
| 3.78E-67 | 0.50904423 | 1.38E-13   | -0.7361545 | 7.53E-33 | -0.7105455 | 9.61E-30   |
| 8.85E-51 | 0.4302214  | 9.84E-10   | -0.7706417 | 1.18E-37 | -0.6839369 | 7.42E-27   |
| 1.59E-33 | 0.2209416  | 0.00250944 | -0.6848124 | 6.03E-27 | -0.3393865 | 2.29E-06   |
| 1.89E-44 | -0.3750333 | 1.44E-07   | 0.51707871 | 4.87E-14 | 0.27971874 | 0.00011523 |
| 2.93E-51 | 0.44003594 | 3.67E-10   | -0.5920264 | 7.00E-19 | -0.3343335 | 3.30E-06   |
| 1.72E-49 | 0.48437804 | 2.83E-12   | -0.8401698 | 1.64E-50 | -0.5637862 | 6.51E-17   |
| 3.76E-44 | -0.5081073 | 1.55E-13   | 0.81487656 | 3.27E-45 | 0.76414003 | 1.10E-36   |
| 2.27E-43 | 0.49368214 | 9.31E-13   | -0.5728527 | 1.59E-17 | -0.4808217 | 4.30E-12   |
| 3.25E-51 | 0.71090965 | 8.73E-30   | -0.8589389 | 4.40E-55 | -0.7210127 | 5.69E-31   |
| 3.79E-38 | -0.539996  | 2.15E-15   | 0.67441213 | 6.78E-26 | 0.85312753 | 1.34E-53   |
| 7.21E-49 | -0.3164432 | 1.14E-05   | 0.56552189 | 4.99E-17 | 0.31734209 | 1.08E-05   |
| 1.11E-38 | 0.40441994 | 1.14E-08   | -0.7193019 | 9.11E-31 | -0.7482869 | 1.89E-34   |
| 2.13E-20 | 0.42039449 | 2.56E-09   | -0.5196503 | 3.47E-14 | -0.3421216 | 1.88E-06   |
| 4.16E-41 | -0.4894603 | 1.55E-12   | 0.72814472 | 7.70E-32 | 0.66529644 | 5.21E-25   |
| 7.59E-67 | -0.3391724 | 2.33E-06   | 0.73615822 | 7.53E-33 | 0.49061761 | 1.35E-12   |
| 1.31E-51 | -0.2674897 | 0.00023242 | 0.5075799  | 1.66E-13 | 0.52588866 | 1.51E-14   |
| 2.21E-39 | 0.45513156 | 7.58E-11   | -0.7220695 | 4.25E-31 | -0.7351443 | 1.01E-32   |
| 2.83E-43 | 0.37174867 | 1.89E-07   | -0.8365859 | 1.05E-49 | -0.6803459 | 1.73E-26   |
| 4.23E-71 | 0.46768311 | 1.92E-11   | -0.7780357 | 8.55E-39 | -0.5338831 | 5.06E-15   |
| 5.32E-38 | 0.40033904 | 1.64E-08   | -0.583699  | 2.79E-18 | -0.4872533 | 2.02E-12   |
| 1.16E-45 | 0.41208146 | 5.61E-09   | -0.6519571 | 9.10E-24 | -0.5410229 | 1.86E-15   |
| 1.38E-48 | -0.3368402 | 2.76E-06   | 0.53415367 | 4.87E-15 | 0.72471273 | 2.03E-31   |
| 1.60E-45 | 0.34083934 | 2.06E-06   | -0.7893874 | 1.24E-40 | -0.6926277 | 9.16E-28   |
| 2.28E-18 | 0.33691522 | 2.74E-06   | -0.5530578 | 3.26E-16 | -0.371619  | 1.91E-07   |
| 4.13E-64 | 0.40929698 | 7.26E-09   | -0.7169168 | 1.75E-30 | -0.5891198 | 1.14E-18   |
| 2.12E-14 | 0.082546   | 0.26397525 | -0.2984067 | 3.70E-05 | -0.1050053 | 0.15488627 |
| 1.44E-47 | 0.36693675 | 2.79E-07   | -0.7305247 | 3.89E-32 | -0.6146367 | 1.33E-20   |
| 3.08E-64 | 0.45189046 | 1.07E-10   | -0.7769019 | 1.29E-38 | -0.5962587 | 3.41E-19   |
| 3.49E-78 | 0.54008049 | 2.13E-15   | -0.8407764 | 1.19E-50 | -0.6260115 | 1.60E-21   |
| 4.46E-48 | 0.41310982 | 5.10E-09   | -0.656891  | 3.21E-24 | -0.4455899 | 2.07E-10   |
| 8.43E-42 | 0.32612003 | 5.90E-06   | -0.637525  | 1.72E-22 | -0.4365543 | 5.23E-10   |
| 3.63E-72 | 0.38320858 | 7.29E-08   | -0.7041623 | 5.07E-29 | -0.549654  | 5.38E-16   |
| 4.25E-53 | 0.28260465 | 9.72E-05   | -0.669198  | 2.20E-25 | -0.6038587 | 9.14E-20   |
| 8.26E-34 | 0.26482955 | 0.00026956 | -0.6969266 | 3.16E-28 | -0.6622232 | 1.02E-24   |
| 8.44E-58 | 0.51052273 | 1.14E-13   | -0.8550914 | 4.29E-54 | -0.7320104 | 2.53E-32   |
| 1.39E-45 | 0.26587555 | 0.00025434 | -0.5721157 | 1.79E-17 | -0.4303169 | 9.75E-10   |
| 2.49E-91 | 0.54010229 | 2.12E-15   | -0.7874311 | 2.62E-40 | -0.6963248 | 3.68E-28   |
| 7.89E-40 | 0.19326688 | 0.00839405 | -0.5613612 | 9.42E-17 | -0.328894  | 4.86E-06   |

|            |            |            |            |            |            |            |
|------------|------------|------------|------------|------------|------------|------------|
| 4.94E-50   | 0.17510133 | 0.01712835 | -0.6030863 | 1.05E-19   | -0.4703553 | 1.42E-11   |
| 4.32E-67   | 0.46142486 | 3.84E-11   | -0.8209612 | 2.07E-46   | -0.6204173 | 4.58E-21   |
| 1.98E-28   | 0.3361672  | 2.89E-06   | -0.5621499 | 8.36E-17   | -0.2743286 | 0.00015763 |
| 0.4517513  | -0.0050692 | 0.94540226 | -0.3094651 | 1.82E-05   | -0.0106119 | 0.88600289 |
| 0.00011208 | -0.105286  | 0.15378023 | 0.00044533 | 0.99519989 | 0.27932977 | 0.00011789 |
| 1.29E-07   | 0.18635805 | 0.01108991 | -0.0426879 | 0.56397561 | 0.30382825 | 2.62E-05   |
| 0.95468055 | 0.00808333 | 0.9130425  | -0.3231129 | 7.26E-06   | 0.03087431 | 0.67653997 |
| 0.00386529 | -0.1242225 | 0.09204863 | -0.0742506 | 0.31515703 | 0.21412779 | 0.00342539 |
| 4.46E-06   | 0.03080092 | 0.67726578 | -0.1042416 | 0.15792662 | 0.42653693 | 1.41E-09   |
| 0.00047244 | -0.1323482 | 0.0725205  | -0.0352959 | 0.63338301 | 0.20550113 | 0.00501317 |
| 8.36E-05   | -0.13952   | 0.05821316 | 0.03433501 | 0.64266343 | 0.31758423 | 1.06E-05   |
| 1.12E-07   | -0.0830115 | 0.26128226 | 0.01237966 | 0.86717596 | 0.48819562 | 1.80E-12   |
| 3.90E-07   | -0.2181239 | 0.00285722 | 0.09949378 | 0.17784009 | 0.3977676  | 2.06E-08   |
| 0.80291756 | -0.0207305 | 0.77941259 | -0.2990811 | 3.54E-05   | 0.03500756 | 0.63616181 |
| 0.00849091 | -0.1083365 | 0.14213893 | -0.0599813 | 0.41734599 | 0.23599164 | 0.00122122 |
| 0.0335781  | -0.1161823 | 0.11528489 | -0.0919862 | 0.21301806 | 0.17134105 | 0.01970245 |
| 0.95474756 | -0.006315  | 0.93201287 | -0.2745784 | 0.00015538 | 0.05231305 | 0.47944456 |
| 0.0372453  | 0.03466824 | 0.63943861 | -0.2360099 | 0.00122012 | 0.20017426 | 0.0062967  |
| 0.02566166 | -0.11704   | 0.11260697 | -0.1374667 | 0.06204902 | 0.30316235 | 2.73E-05   |
| 0.85114225 | -0.0292238 | 0.69293388 | -0.2404185 | 0.00097944 | -0.0123867 | 0.86710094 |
| 0.29931343 | -0.0388507 | 0.59955271 | -0.1825093 | 0.01290103 | 0.14377666 | 0.05088174 |
| 0.00031624 | -0.1111114 | 0.13214394 | -0.0386935 | 0.60103228 | 0.25416777 | 0.00048098 |
| 1.99E-06   | -0.0645385 | 0.3827837  | -0.0394282 | 0.59413454 | 0.50921178 | 1.35E-13   |
| 1.49E-07   | -0.1316858 | 0.0739747  | 0.05928581 | 0.42277622 | 0.38752431 | 5.05E-08   |
| 1.70E-07   | -0.0761214 | 0.30308516 | -0.0298977 | 0.68622288 | 0.37322758 | 1.67E-07   |
| 0.00039887 | -0.0975286 | 0.18660399 | -0.0398094 | 0.59057029 | 0.25113489 | 0.00056459 |
| 2.17E-11   | -0.1774471 | 0.01567522 | 0.12197969 | 0.09811931 | 0.56503282 | 5.38E-17   |
| 0.68677485 | -0.016741  | 0.82106555 | -0.3319959 | 3.90E-06   | -0.0609655 | 0.409731   |
| 0.03181547 | -0.1359087 | 0.06509608 | -0.0988087 | 0.18085994 | 0.52545801 | 1.60E-14   |
| 0.00078703 | -0.0786405 | 0.28731708 | -0.0673753 | 0.36217544 | 0.24245326 | 0.0008838  |
| 0.00824129 | -0.0945041 | 0.20070425 | -0.1057115 | 0.15211463 | 0.16591714 | 0.02400254 |
| 3.66E-05   | -0.107374  | 0.14573708 | -0.0347837 | 0.63832251 | 0.32475068 | 6.48E-06   |
| 0.70950207 | -0.0511715 | 0.48909857 | -0.2531343 | 0.00050809 | -0.0112628 | 0.87906249 |
| 0.55781002 | 0.00902631 | 0.90294542 | -0.3220447 | 7.81E-06   | -0.029882  | 0.68637868 |
| 0.89083259 | -0.0532675 | 0.47145295 | -0.2200658 | 0.00261319 | 0.06171501 | 0.40398732 |
| 0.65375729 | -0.0271215 | 0.71402221 | -0.2646329 | 0.00027252 | 0.11522718 | 0.11832492 |
| 0.00014797 | -0.1956042 | 0.00762367 | 0.02759352 | 0.70926778 | 0.32719309 | 5.47E-06   |
| 0.47678452 | -0.017581  | 0.81224986 | -0.2374333 | 0.00113706 | 0.06037665 | 0.41427697 |
| 0.03767294 | -0.0581726 | 0.43155297 | -0.2085416 | 0.00439071 | 0.08716279 | 0.2380983  |
| 0.00014765 | 0.00099045 | 0.98932443 | -0.0889566 | 0.22853977 | 0.22200148 | 0.0023889  |
| 8.68E-05   | -0.1159743 | 0.11594146 | -0.039233  | 0.5959632  | 0.27418164 | 0.00015896 |
| 0.53651222 | -0.0226133 | 0.75996326 | -0.279533  | 0.00011649 | 0.08646294 | 0.24190234 |
| 0.08531283 | -0.0549742 | 0.45734597 | -0.1832892 | 0.01251438 | 0.1262604  | 0.0867958  |
| 0.34687139 | -0.0484959 | 0.51212619 | -0.2117278 | 0.00381382 | 0.07120259 | 0.33548789 |
| 0.00050592 | -0.0285873 | 0.69929411 | -0.1976842 | 0.00699165 | 0.29122487 | 5.78E-05   |
| 0.0156824  | -0.0792429 | 0.28362928 | -0.1395082 | 0.05823459 | 0.16127728 | 0.02829892 |



|            |            |            |            |            |            |            |
|------------|------------|------------|------------|------------|------------|------------|
| 3.52E-06   | -0.1328927 | 0.07134243 | 0.04309017 | 0.56030546 | 0.33261815 | 3.73E-06   |
| 0.00687566 | -0.117432  | 0.11139934 | -0.1151184 | 0.11867496 | 0.22124758 | 0.00247408 |
| 1.09E-10   | -0.1964708 | 0.00735443 | 0.09393864 | 0.20342362 | 0.47472222 | 8.68E-12   |
| 3.77E-07   | -0.1574703 | 0.0322995  | 0.08779179 | 0.23471526 | 0.34731126 | 1.28E-06   |
| 0.00562087 | -0.0740284 | 0.31661163 | -0.1056765 | 0.15225099 | 0.16335017 | 0.02630442 |
| 0.09621653 | -0.0528264 | 0.47513748 | -0.1351062 | 0.06671281 | 0.31727959 | 1.08E-05   |
| 0.0009658  | -0.010031  | 0.89220448 | -0.1868485 | 0.01087602 | 0.15829534 | 0.03139392 |
| 4.99E-08   | -0.2343606 | 0.00132329 | 0.12283449 | 0.09576925 | 0.39546614 | 2.53E-08   |
| 0.00010562 | -0.116151  | 0.11538347 | 0.00547694 | 0.9410183  | 0.28196592 | 0.00010093 |
| 9.87E-06   | -0.0804917 | 0.27608631 | 0.0180346  | 0.80749855 | 0.2858854  | 7.99E-05   |
| 0.84036748 | -0.0539333 | 0.46592115 | -0.2954583 | 4.45E-05   | 0.08083553 | 0.27403351 |
| 0.72029093 | 0.02736517 | 0.7115665  | -0.3329568 | 3.64E-06   | 0.05593517 | 0.44950758 |
| 0.00087279 | -0.1031196 | 0.16247424 | -0.0416039 | 0.57392327 | 0.27207469 | 0.00017935 |
| 0.95573521 | 0.01559785 | 0.83309905 | -0.3462076 | 1.39E-06   | 0.0036175  | 0.96102289 |
| 0.56626034 | -0.0384084 | 0.60371741 | -0.2535009 | 0.00049831 | 0.02724305 | 0.71279692 |
| 2.07E-07   | -0.075239  | 0.30874075 | -0.0219123 | 0.76718807 | 0.51378074 | 7.48E-14   |
| 0.75464712 | -0.0971342 | 0.18840024 | -0.1469459 | 0.04593596 | 0.13338386 | 0.07029322 |
| 0.00358736 | -0.1276538 | 0.08334425 | -0.0468059 | 0.52695506 | 0.28244539 | 9.81E-05   |
| 0.75718904 | -0.0573118 | 0.43841165 | -0.2175845 | 0.00292856 | 0.07204494 | 0.32978729 |
| 0.01798414 | -0.038363  | 0.60414571 | -0.1488614 | 0.04314618 | 0.09548642 | 0.19604248 |
| 0.15520861 | -0.0313399 | 0.6719421  | -0.1951023 | 0.00778358 | 0.16028309 | 0.0293005  |
| 0.00223127 | -0.0688145 | 0.35198916 | -0.0789737 | 0.28527333 | 0.24087599 | 0.00095715 |
| 2.59E-05   | -0.1229428 | 0.09547476 | 0.00176345 | 0.98099386 | 0.28347884 | 9.23E-05   |
| 0.00023169 | -0.1281517 | 0.08213819 | -0.0239587 | 0.74615691 | 0.24073743 | 0.00096385 |
| 0.18849061 | -0.0530987 | 0.47286059 | -0.2007605 | 0.00614233 | 0.11454778 | 0.12052518 |
| 0.7714966  | -0.0208614 | 0.77805593 | -0.296116  | 4.27E-05   | 0.00642755 | 0.93080472 |
| 0.44315055 | -0.056666  | 0.44359746 | -0.2181996 | 0.00284733 | 0.03823484 | 0.60535571 |
| 0.00066152 | -0.107065  | 0.14690701 | -0.0434236 | 0.55727179 | 0.21042878 | 0.00404022 |
| 0.18510846 | -0.0655953 | 0.37502403 | -0.1974702 | 0.00705443 | 0.06618966 | 0.37070321 |
| 2.50E-05   | -0.1321124 | 0.07303548 | 0.01767018 | 0.81131491 | 0.28543194 | 8.21E-05   |
| 0.10697007 | -0.054609  | 0.46034468 | -0.1970659 | 0.00717446 | 0.12909513 | 0.07989109 |
| 0.00032076 | -0.1359351 | 0.06504352 | 0.01230953 | 0.86792153 | 0.26667837 | 0.00024321 |
| 4.25E-05   | -0.1239985 | 0.09264133 | 0.00320484 | 0.96546625 | 0.28281573 | 9.60E-05   |
| 0.84117634 | -0.0310841 | 0.67446684 | -0.2645974 | 0.00027306 | 0.02797171 | 0.70546648 |
| 0.61892754 | -0.0846027 | 0.25221923 | -0.1772459 | 0.01579551 | 0.10010528 | 0.17517603 |
| 1.22E-05   | -0.160907  | 0.02866851 | -0.063862  | 0.38780131 | 0.33586646 | 2.96E-06   |
| 8.70E-05   | -0.1244846 | 0.09135923 | -0.0009343 | 0.98992964 | 0.30730056 | 2.09E-05   |
| 0.00043584 | -0.086242  | 0.24311186 | -0.0565938 | 0.44417944 | 0.20947918 | 0.00421331 |
| 0.0181031  | -0.2605707 | 0.00034071 | 0.08063109 | 0.27525284 | 0.33063498 | 4.29E-06   |
| 2.09E-05   | -0.1245619 | 0.09115676 | 0.01675492 | 0.82091929 | 0.38196959 | 8.10E-08   |
| 0.00146212 | -0.0834179 | 0.25894625 | -0.0846334 | 0.25204624 | 0.20986872 | 0.00414152 |
| 0.00451509 | -0.0580292 | 0.4326912  | -0.121323  | 0.0999556  | 0.08571139 | 0.24603441 |
| 0.05007469 | -0.0465552 | 0.52917286 | -0.15071   | 0.04058996 | 0.13835662 | 0.06036182 |
| 0.00012497 | -0.1081053 | 0.14299695 | -0.0338271 | 0.64759152 | 0.26570255 | 0.0002568  |
| 0.00143106 | -0.0932334 | 0.20685269 | -0.030019  | 0.68501661 | 0.26454065 | 0.00027392 |
| 0.05076047 | -0.0700053 | 0.34369808 | -0.152025  | 0.03885002 | 0.15708569 | 0.03272916 |

|            |            |            |            |            |            |            |
|------------|------------|------------|------------|------------|------------|------------|
| 0.45276746 | -0.0557122 | 0.45131945 | -0.2385834 | 0.00107377 | 0.08144148 | 0.27044097 |
| 0.0011655  | -0.0745149 | 0.31343309 | -0.098604  | 0.18176962 | 0.23626075 | 0.00120509 |
| 6.72E-07   | -0.2426682 | 0.00087421 | 0.04917875 | 0.50619631 | 0.34850855 | 1.17E-06   |
| 0.00095356 | -0.0964789 | 0.19141292 | -0.0039781 | 0.95714096 | 0.26506142 | 0.00026612 |
| 0.00819965 | -0.1022914 | 0.16589347 | -0.1091965 | 0.1389814  | 0.18675892 | 0.01091481 |
| 0.06876438 | -0.0913757 | 0.21608338 | -0.1389933 | 0.05917802 | 0.15811615 | 0.03158874 |
| 0.50672231 | -0.012263  | 0.86841665 | -0.296375  | 4.20E-05   | 0.06461999 | 0.38218171 |
| 0.64632827 | -0.0286156 | 0.69901174 | -0.2430371 | 0.00085798 | 0.05096243 | 0.49087761 |
| 0.47138412 | -0.0105546 | 0.88661474 | -0.2955045 | 4.43E-05   | 0.07792808 | 0.29171966 |
| 0.00040448 | -0.113496  | 0.12399396 | -0.038482  | 0.60302365 | 0.24029273 | 0.00098566 |
| 0.66306481 | -0.0433194 | 0.55821875 | -0.2108408 | 0.00396714 | 0.07292677 | 0.32388656 |
| 0.00021744 | -0.1510695 | 0.04010787 | 0.01796611 | 0.80821551 | 0.24213955 | 0.00089796 |
| 0.12186694 | -0.0888308 | 0.2292012  | -0.1595844 | 0.03002236 | 0.10076182 | 0.17234875 |
| 0.01106    | -0.1053456 | 0.15354609 | -0.0604878 | 0.41341679 | 0.2030113  | 0.00558061 |
| 3.03E-06   | -0.0930082 | 0.2079561  | 0.01924808 | 0.79482381 | 0.37091344 | 2.02E-07   |
| 0.24529878 | -0.0421606 | 0.56880436 | -0.2121589 | 0.00374126 | 0.11053523 | 0.13417347 |
| 3.77E-05   | -0.1088074 | 0.14040341 | 0.00671282 | 0.92774179 | 0.28529274 | 8.28E-05   |
| 0.00046729 | -0.0709489 | 0.33721695 | -0.0519891 | 0.48217365 | 0.2401326  | 0.00099362 |
| 3.17E-06   | -0.0525972 | 0.47705799 | -0.0296275 | 0.68890993 | 0.4283722  | 1.18E-09   |
| 0.00038644 | -0.0867518 | 0.2403272  | -0.0328563 | 0.6570534  | 0.22904539 | 0.00171248 |
| 0.00014592 | -0.1110138 | 0.13248593 | -0.0131305 | 0.85920064 | 0.26912332 | 0.00021203 |
| 8.11E-06   | -0.1296639 | 0.07856053 | 0.06129523 | 0.4071982  | 0.31814458 | 1.02E-05   |
| 0.00023516 | -0.131338  | 0.07474772 | -0.0077424 | 0.91669617 | 0.23820637 | 0.00109415 |
| 0.04790939 | -0.0645134 | 0.38296867 | -0.1729357 | 0.01857257 | 0.13631766 | 0.06428474 |
| 0.00652514 | -0.0682643 | 0.3558618  | -0.1098736 | 0.13653361 | 0.13894059 | 0.05927525 |
| 6.51E-05   | -0.1156329 | 0.11702597 | -0.0023199 | 0.97499773 | 0.30115613 | 3.11E-05   |
| 0.74353009 | 0.01421586 | 0.84769854 | -0.3313176 | 4.09E-06   | 0.03157718 | 0.6696041  |
| 0.00030849 | -0.0938934 | 0.20364248 | 0.00076557 | 0.99174816 | 0.30976155 | 1.78E-05   |
| 1.20E-07   | -0.1222601 | 0.0973434  | 0.00218907 | 0.97640775 | 0.48499299 | 2.63E-12   |
| 7.62E-09   | -0.1180705 | 0.10945407 | -0.0025194 | 0.97284868 | 0.27185011 | 0.00018166 |
| 0.00029474 | -0.1142098 | 0.12163143 | -0.0026048 | 0.97192871 | 0.28378479 | 9.06E-05   |
| 0.14927874 | -0.0299157 | 0.68604336 | -0.2011142 | 0.00605086 | 0.12446703 | 0.09140534 |
| 5.11E-05   | -0.144181  | 0.05022712 | 0.00587461 | 0.93674438 | 0.28295625 | 9.52E-05   |
| 0.33644191 | -0.0159282 | 0.82961724 | -0.3243766 | 6.65E-06   | -0.0392825 | 0.59549985 |
| 0.0246838  | -0.075364  | 0.30793505 | -0.1176436 | 0.11075182 | 0.15136195 | 0.03971933 |
| 0.00108962 | -0.0864621 | 0.24190709 | -0.047028  | 0.52499352 | 0.22086575 | 0.00251827 |
| 0.00038729 | -0.1171021 | 0.11241498 | -0.0405801 | 0.58339391 | 0.21621185 | 0.00311747 |
| 7.26E-05   | -0.1016219 | 0.16869654 | -0.0179312 | 0.80858061 | 0.31038571 | 1.71E-05   |
| 1.54E-05   | -0.1024968 | 0.16504053 | -0.0005014 | 0.99459519 | 0.2602989  | 0.00034579 |
| 0.00024616 | -0.10962   | 0.13744645 | -0.0282946 | 0.70222719 | 0.26811359 | 0.00022442 |
| 0.57605725 | -0.0679466 | 0.35810978 | -0.1282245 | 0.08196302 | 0.09839518 | 0.18270122 |
| 0.23010852 | -0.0660015 | 0.37206752 | -0.1623175 | 0.02728249 | 0.23303039 | 0.00141225 |
| 0.00087577 | -0.0788407 | 0.2860882  | -0.0605525 | 0.4129159  | 0.22458651 | 0.00211662 |
| 0.57318851 | -0.0578148 | 0.4343964  | -0.2521042 | 0.00053651 | 0.01085235 | 0.88343847 |
| 0.00022311 | -0.1178959 | 0.10998345 | -0.0123463 | 0.86753028 | 0.26230066 | 0.00030993 |
| 0.00112139 | -0.0942555 | 0.20189637 | -0.0510812 | 0.48986651 | 0.21173363 | 0.00381283 |

|            |            |            |            |            |            |            |
|------------|------------|------------|------------|------------|------------|------------|
| 0.00258543 | -0.0376732 | 0.61066918 | -0.0882397 | 0.23232697 | 0.24991039 | 0.000602   |
| 0.78243074 | 0.03210263 | 0.6644371  | -0.2774306 | 0.00013172 | 0.10668351 | 0.14836081 |
| 0.00019389 | -0.0942261 | 0.20203771 | -0.027729  | 0.70790508 | 0.26239741 | 0.00030829 |
| 0.97149396 | -0.012925  | 0.8613819  | -0.2681256 | 0.00022427 | 0.0470593  | 0.52471782 |
| 0.52896119 | -0.0257124 | 0.7282802  | -0.2166772 | 0.00305223 | 0.07619764 | 0.30259946 |
| 0.61097464 | -0.0112543 | 0.87915357 | -0.332025  | 3.89E-06   | 0.06547304 | 0.37591707 |
| 0.00595138 | -0.0829532 | 0.26161848 | -0.1491746 | 0.04270375 | 0.38999357 | 4.08E-08   |
| 0.00038308 | 0.13501797 | 0.06689251 | -0.0784613 | 0.28842019 | 0.41474188 | 4.37E-09   |
| 0.00039128 | -0.1196933 | 0.10463014 | -0.0235351 | 0.75049543 | 0.25392676 | 0.00048718 |
| 0.78610286 | -0.0174643 | 0.81347254 | -0.3160529 | 1.17E-05   | 0.02819088 | 0.70326689 |
| 0.00084066 | -0.1323169 | 0.07258868 | -0.0366543 | 0.62035983 | 0.21285288 | 0.00362704 |
| 0.3626714  | -0.0267222 | 0.71805254 | -0.2753075 | 0.00014898 | 0.09000995 | 0.22305506 |
| 0.92389773 | 0.00512324 | 0.94482111 | -0.3444309 | 1.58E-06   | -0.0820448 | 0.26689626 |
| 0.8917061  | -0.0116193 | 0.87526523 | -0.2672312 | 0.0002358  | 0.09076204 | 0.21919645 |
| 2.20E-05   | -0.143281  | 0.05169386 | 0.02015992 | 0.7853347  | 0.30034614 | 3.27E-05   |
| 0.20028686 | -0.0500255 | 0.49889333 | -0.2104648 | 0.00403378 | 0.09754337 | 0.18653705 |
| 0.00015078 | -0.1168169 | 0.11329871 | -0.0326335 | 0.65923313 | 0.25270474 | 0.00051977 |
| 0.69155596 | -0.000238  | 0.99743478 | -0.3262092 | 5.86E-06   | 0.0023778  | 0.97437441 |
| 0.01804504 | -0.0930194 | 0.20790116 | -0.0679134 | 0.35834555 | 0.21569039 | 0.00319207 |
| 1.79E-05   | -0.1307804 | 0.07600063 | 0.02941318 | 0.69104531 | 0.29252939 | 5.33E-05   |
| 8.49E-07   | -0.163612  | 0.02606127 | 0.06523517 | 0.37765757 | 0.33476851 | 3.20E-06   |
| 0.00013522 | -0.0807417 | 0.27459241 | -0.0114899 | 0.87664407 | 0.26036687 | 0.00034451 |
| 0.00107561 | -0.0919833 | 0.2130324  | -0.0345675 | 0.64041313 | 0.30761329 | 2.05E-05   |
| 0.37666027 | -0.016269  | 0.82602952 | -0.2529737 | 0.00051242 | 0.09374578 | 0.20435719 |
| 8.99E-06   | -0.1159274 | 0.1160901  | 0.00240242 | 0.97410914 | 0.30613589 | 2.26E-05   |
| 8.14E-06   | -0.1236769 | 0.09349732 | 0.04578221 | 0.53604195 | 0.31528866 | 1.23E-05   |
| 0.00010136 | -0.1409077 | 0.05573291 | -0.017076  | 0.81754653 | 0.24373072 | 0.00082822 |
| 0.70025488 | -0.0325551 | 0.66000074 | -0.2272484 | 0.00186603 | 0.04910169 | 0.50686376 |
| 0.07219376 | -0.0134442 | 0.85587361 | -0.2318906 | 0.00149279 | 0.36741502 | 2.68E-07   |
| 1.13E-05   | -0.1348152 | 0.06730695 | 0.03453135 | 0.64076248 | 0.30276061 | 2.80E-05   |
| 0.00021168 | -0.122264  | 0.09733256 | -0.009952  | 0.89304886 | 0.27067555 | 0.00019421 |
| 7.99E-05   | -0.0665193 | 0.36831979 | -0.1708979 | 0.02002679 | 0.17559902 | 0.01681062 |
| 0.00117439 | -0.0987471 | 0.18113348 | -0.0530811 | 0.4730082  | 0.23786864 | 0.00111271 |
| 9.40E-05   | -0.1064897 | 0.14910371 | -0.0072111 | 0.92239406 | 0.26470722 | 0.0002714  |
| 0.1354175  | -0.0846735 | 0.25182119 | -0.1577879 | 0.03194832 | 0.12441528 | 0.09154119 |
| 0.66283512 | 0.0740694  | 0.31634288 | -0.3356388 | 3.01E-06   | -0.1216055 | 0.0991623  |
| 0.00025775 | -0.1303907 | 0.07688645 | -0.0202811 | 0.78407556 | 0.24402367 | 0.00081593 |
| 0.00143086 | -0.1134671 | 0.12409013 | -0.0559975 | 0.44900188 | 0.22383205 | 0.00219302 |
| 8.06E-09   | -0.1144201 | 0.12094217 | 0.01630616 | 0.82563816 | 0.38348059 | 7.13E-08   |
| 8.16E-05   | -0.1167764 | 0.11342458 | -0.0221001 | 0.76525029 | 0.27317694 | 0.0001684  |
| 2.61E-05   | -0.1417255 | 0.0543126  | 0.0569092  | 0.44164034 | 0.29165699 | 5.63E-05   |
| 4.36E-09   | -0.2317492 | 0.00150307 | 0.09896563 | 0.18016501 | 0.50885524 | 1.41E-13   |
| 0.00076008 | -0.0890443 | 0.22807962 | -0.0539553 | 0.46573956 | 0.24574044 | 0.00074725 |
| 0.02321979 | -0.0163804 | 0.82485695 | -0.1157802 | 0.11655717 | 0.30575985 | 2.31E-05   |
| 0.00017709 | -0.0036547 | 0.96062216 | -0.1434817 | 0.0513638  | 0.19683139 | 0.0072449  |
| 7.29E-06   | -0.1008194 | 0.17210257 | 0.00806356 | 0.91325432 | 0.32039409 | 8.75E-06   |

|            |            |            |            |            |            |            |
|------------|------------|------------|------------|------------|------------|------------|
| 0.00044375 | -0.0983956 | 0.1826995  | -0.0161435 | 0.82735034 | 0.24622724 | 0.00072877 |
| 0.00134127 | -0.0929353 | 0.20831459 | -0.0690845 | 0.35009827 | 0.26071984 | 0.00033794 |
| 0.00130348 | -0.118152  | 0.10920762 | -0.0471907 | 0.52356003 | 0.18613924 | 0.01118652 |
| 0.00026703 | -0.0977112 | 0.18577682 | -0.0330624 | 0.65503962 | 0.26680885 | 0.00024144 |
| 0.00059332 | -0.1127237 | 0.12658963 | -0.0394197 | 0.5942142  | 0.23168625 | 0.00150766 |
| 0.08728886 | 0.02042069 | 0.78262672 | -0.277509  | 0.00013112 | 0.28406334 | 8.91E-05   |
| 0.00010539 | -0.0940665 | 0.20280623 | -0.014078  | 0.84915794 | 0.26063077 | 0.00033959 |
| 0.00011531 | -0.1379216 | 0.06118175 | 0.04911141 | 0.50677953 | 0.33311448 | 3.60E-06   |
| 0.97954601 | 0.0245617  | 0.73999417 | -0.3566299 | 6.27E-07   | 0.03626077 | 0.62412108 |
| 0.0849357  | -0.0495505 | 0.50298297 | -0.211184  | 0.00390717 | 0.13731381 | 0.06234284 |
| 0.00155654 | -0.1137691 | 0.12308584 | -0.0443694 | 0.54870963 | 0.24972492 | 0.00060786 |
| 0.00011611 | 0.19754912 | 0.00703123 | -0.5705497 | 2.29E-17   | -0.5430092 | 1.40E-15   |
| 5.19E-12   | 0.37907326 | 1.03E-07   | -0.5309934 | 7.54E-15   | -0.7757856 | 1.92E-38   |
| 7.60E-05   | 0.17438034 | 0.01759792 | -0.4295733 | 1.05E-09   | -0.7294244 | 5.34E-32   |
| 2.43E-08   | 0.14321966 | 0.05179512 | -0.5347702 | 4.48E-15   | -0.7596844 | 4.86E-36   |
| 2.66E-09   | -0.3445311 | 1.57E-06   | 0.66951019 | 2.05E-25   | 0.77215505 | 6.96E-38   |
| 0.28867084 | 0.06345888 | 0.39081003 | -0.3678591 | 2.59E-07   | -0.4711481 | 1.30E-11   |
| 1.84E-09   | 0.27914781 | 0.00011915 | -0.6174255 | 7.98E-21   | -0.6802291 | 1.77E-26   |
| 0.04168281 | 0.28813642 | 6.97E-05   | -0.336045  | 2.92E-06   | -0.5306274 | 7.92E-15   |
| 6.04E-05   | 0.43790301 | 4.56E-10   | -0.4213714 | 2.33E-09   | -0.7331848 | 1.80E-32   |
| 0.55940882 | 0.10282784 | 0.16367268 | -0.2894021 | 6.46E-05   | -0.6088271 | 3.79E-20   |
| 2.41E-06   | 0.43204543 | 8.22E-10   | -0.5341094 | 4.90E-15   | -0.7175788 | 1.46E-30   |
| 4.90E-05   | 0.26558949 | 0.00025842 | -0.5396607 | 2.26E-15   | -0.5999525 | 1.81E-19   |
| 1.96E-05   | 0.20781589 | 0.00453262 | -0.4219909 | 2.20E-09   | -0.715953  | 2.27E-30   |
| 0.0765098  | 0.18462205 | 0.01187706 | -0.351042  | 9.63E-07   | -0.607947  | 4.44E-20   |
| 0.15935661 | 0.29556734 | 4.42E-05   | -0.3433928 | 1.71E-06   | -0.5915116 | 7.63E-19   |
| 2.64E-10   | 0.39423705 | 2.82E-08   | -0.6634013 | 7.90E-25   | -0.7425212 | 1.12E-33   |
| 0.00039717 | 0.27985931 | 0.00011428 | -0.4918484 | 1.16E-12   | -0.602621  | 1.14E-19   |
| 5.29E-08   | 0.54578604 | 9.42E-16   | -0.560273  | 1.11E-16   | -0.7469064 | 2.90E-34   |
| 1.58E-06   | 0.09091861 | 0.21839918 | -0.4051324 | 1.06E-08   | -0.6778805 | 3.06E-26   |
| 0.33120449 | 0.44046859 | 3.52E-10   | -0.3634929 | 3.67E-07   | -0.4974095 | 5.91E-13   |
| 0.0004585  | 0.19639917 | 0.00737635 | -0.385717  | 5.89E-08   | -0.6266197 | 1.43E-21   |
| 7.25E-06   | 0.38439236 | 6.60E-08   | -0.4996702 | 4.47E-13   | -0.7302206 | 4.25E-32   |
| 2.91E-05   | 0.18536116 | 0.01153612 | -0.5088671 | 1.41E-13   | -0.6289943 | 9.06E-22   |
| 0.1243943  | 0.1312778  | 0.07488217 | -0.3201104 | 8.92E-06   | -0.5821041 | 3.62E-18   |
| 0.22326157 | 0.06029328 | 0.41492296 | -0.1305617 | 0.07649676 | -0.2040654 | 0.0053337  |
| 9.27E-06   | -0.2688594 | 0.0002152  | 0.45869264 | 5.16E-11   | 0.78455274 | 7.76E-40   |
| 0.02726038 | 0.30450769 | 2.51E-05   | -0.4002113 | 1.66E-08   | -0.5817271 | 3.85E-18   |
| 2.87E-12   | 0.27279854 | 0.00017209 | -0.641562  | 7.67E-23   | -0.7832544 | 1.26E-39   |
| 0.06373292 | 0.1565829  | 0.03329817 | -0.3495778 | 1.08E-06   | -0.5657848 | 4.79E-17   |
| 4.46E-11   | 0.25385475 | 0.00048904 | -0.5863331 | 1.81E-18   | -0.7665839 | 4.79E-37   |
| 3.75E-07   | 0.32969156 | 4.59E-06   | -0.5692499 | 2.80E-17   | -0.7680232 | 2.93E-37   |
| 0.00050935 | 0.3858662  | 5.82E-08   | -0.5607972 | 1.03E-16   | -0.554531  | 2.63E-16   |
| 1.02E-12   | -0.4035108 | 1.23E-08   | 0.63913857 | 1.25E-22   | 0.86564962 | 7.03E-57   |
| 1.11E-14   | -0.3754252 | 1.40E-07   | 0.70241666 | 7.92E-29   | 0.82681627 | 1.32E-47   |
| 2.58E-09   | 0.31393612 | 1.35E-05   | -0.6023099 | 1.20E-19   | -0.733262  | 1.76E-32   |

|            |            |            |            |            |            |            |
|------------|------------|------------|------------|------------|------------|------------|
| 6.89E-05   | 0.33500364 | 3.15E-06   | -0.4624885 | 3.41E-11   | -0.7466722 | 3.12E-34   |
| 8.61E-05   | 0.37773265 | 1.15E-07   | -0.4895547 | 1.53E-12   | -0.7161307 | 2.16E-30   |
| 9.15E-24   | 0.42891452 | 1.12E-09   | -0.7837351 | 1.05E-39   | -0.8563295 | 2.08E-54   |
| 3.33E-15   | 0.56299124 | 7.35E-17   | -0.7584159 | 7.38E-36   | -0.8095069 | 3.44E-44   |
| 0.01549037 | 0.23815358 | 0.00109703 | -0.3584811 | 5.43E-07   | -0.6330722 | 4.11E-22   |
| 0.03023963 | 0.30171783 | 3.00E-05   | -0.4353299 | 5.92E-10   | -0.6259278 | 1.63E-21   |
| 0.56463219 | 0.0737394  | 0.31850968 | -0.2371632 | 0.00115241 | -0.3630354 | 3.80E-07   |
| 0.01630854 | 0.61740561 | 8.00E-21   | -0.3751693 | 1.43E-07   | -0.5514428 | 4.14E-16   |
| 7.24E-06   | 0.44362871 | 2.54E-10   | -0.4709065 | 1.34E-11   | -0.7508207 | 8.52E-35   |
| 2.64E-05   | 0.19876217 | 0.00668283 | -0.5557071 | 2.20E-16   | -0.6183125 | 6.77E-21   |
| 2.56E-08   | 0.41747126 | 3.38E-09   | -0.5563468 | 2.00E-16   | -0.8085264 | 5.24E-44   |
| 2.07E-08   | 0.32464925 | 6.53E-06   | -0.6258218 | 1.66E-21   | -0.7113304 | 7.81E-30   |
| 0.0002945  | 0.49221743 | 1.11E-12   | -0.4972188 | 6.05E-13   | -0.7205538 | 6.46E-31   |
| 0.0001028  | 0.30204273 | 2.94E-05   | -0.4929139 | 1.02E-12   | -0.5797684 | 5.28E-18   |
| 0.02199791 | 0.39517709 | 2.59E-08   | -0.3935054 | 3.00E-08   | -0.6824269 | 1.06E-26   |
| 5.37E-05   | 0.26258678 | 0.0003051  | -0.4886777 | 1.70E-12   | -0.6543293 | 5.53E-24   |
| 0.00275177 | 0.38722398 | 5.18E-08   | -0.4284687 | 1.17E-09   | -0.7026349 | 7.49E-29   |
| 4.29E-15   | 0.40358797 | 1.22E-08   | -0.6599732 | 1.66E-24   | -0.81959   | 3.90E-46   |
| 3.52E-16   | 0.40765885 | 8.44E-09   | -0.66559   | 4.89E-25   | -0.8013125 | 1.08E-42   |
| 8.79E-12   | 0.36632491 | 2.93E-07   | -0.5918171 | 7.25E-19   | -0.8072205 | 9.15E-44   |
| 0.00328294 | 0.11643102 | 0.11450312 | -0.4219416 | 2.21E-09   | -0.6240545 | 2.32E-21   |
| 9.27E-05   | 0.22562919 | 0.00201503 | -0.506065  | 2.01E-13   | -0.543332  | 1.34E-15   |
| 3.79E-05   | 0.4993651  | 4.64E-13   | -0.5057075 | 2.10E-13   | -0.7395096 | 2.77E-33   |
| 0.34900828 | 0.03499766 | 0.63625727 | 0.12270335 | 0.09612687 | 0.07092279 | 0.33739523 |
| 0.00396949 | -0.1053698 | 0.15345092 | 0.25651435 | 0.00042431 | 0.09784893 | 0.18515432 |
| 0.05288568 | -0.097145  | 0.18835098 | 0.17435017 | 0.01761781 | -0.0154248 | 0.83492421 |
| 0.00022345 | 0.21936659 | 0.00269878 | -0.2513976 | 0.00055685 | -0.471804  | 1.21E-11   |
| 0.37286982 | -0.1438755 | 0.05072106 | 0.05022441 | 0.49718583 | -0.1808343 | 0.01376709 |
| 0.26560774 | -0.1943129 | 0.00804112 | -0.1179329 | 0.10987114 | -0.0533899 | 0.4704337  |
| 0.0103524  | -0.215373  | 0.00323827 | 0.22750657 | 0.00184323 | 0.11925748 | 0.10590885 |
| 3.34E-11   | 0.82609074 | 1.87E-47   | -0.405046  | 1.07E-08   | -0.3980896 | 2.00E-08   |
| 9.43E-08   | 0.80857215 | 5.14E-44   | -0.4858002 | 2.40E-12   | -0.354669  | 7.30E-07   |
| 1.81E-33   | 0.86550993 | 7.68E-57   | -0.7182593 | 1.21E-30   | -0.557815  | 1.61E-16   |
| 0.00066532 | 0.760896   | 3.25E-36   | -0.3034722 | 2.68E-05   | -0.2759458 | 0.00014358 |
| 5.62E-21   | 0.86100229 | 1.26E-55   | -0.6259974 | 1.60E-21   | -0.5006271 | 3.97E-13   |
| 3.31E-10   | 0.84613574 | 6.73E-52   | -0.5250948 | 1.68E-14   | -0.5076555 | 1.64E-13   |
| 3.52E-05   | 0.7422949  | 1.20E-33   | -0.3224642 | 7.59E-06   | -0.1189075 | 0.1069446  |
| 0.35288124 | 0.80205026 | 7.98E-43   | -0.2510905 | 0.00056591 | 0.03723743 | 0.6148057  |
| 0.20342801 | 0.83715143 | 7.83E-50   | -0.3680357 | 2.55E-07   | -0.3201888 | 8.87E-06   |
| 1.01E-05   | 0.81984991 | 3.46E-46   | -0.3278195 | 5.24E-06   | -0.4283736 | 1.18E-09   |
| 0.59978277 | 0.71009984 | 1.08E-29   | -0.2677784 | 0.00022868 | -0.3188236 | 9.73E-06   |
| 2.70E-14   | 0.86186764 | 7.43E-56   | -0.5312359 | 7.29E-15   | -0.3797019 | 9.79E-08   |
| 6.99E-12   | 0.78237461 | 1.75E-39   | -0.5824173 | 3.44E-18   | -0.2936667 | 4.97E-05   |
| 3.81E-05   | 0.84561604 | 8.93E-52   | -0.3983525 | 1.96E-08   | -0.1156534 | 0.11696067 |
| 9.53E-25   | 0.86255275 | 4.87E-56   | -0.7103372 | 1.02E-29   | -0.5776918 | 7.38E-18   |
| 7.98E-11   | 0.8192415  | 4.57E-46   | -0.6992111 | 1.79E-28   | -0.6186148 | 6.40E-21   |

|            |            |            |            |            |            |            |
|------------|------------|------------|------------|------------|------------|------------|
| 4.83E-18   | 0.85746268 | 1.06E-54   | -0.6570543 | 3.10E-24   | -0.5904275 | 9.15E-19   |
| 1.96E-12   | 0.91352862 | 2.09E-73   | -0.5255062 | 1.59E-14   | -0.4841233 | 2.92E-12   |
| 0.54403784 | 0.61442459 | 1.38E-20   | -0.1536322 | 0.03680934 | -0.1230445 | 0.09519876 |
| 3.54E-07   | 0.76795987 | 2.99E-37   | -0.4128264 | 5.23E-09   | -0.1700521 | 0.02065878 |
| 8.91E-17   | 0.81033899 | 2.40E-44   | -0.5699577 | 2.51E-17   | -0.3315818 | 4.02E-06   |
| 9.10E-21   | 0.84563213 | 8.86E-52   | -0.718044  | 1.29E-30   | -0.4230844 | 1.98E-09   |
| 0.08050575 | 0.62733932 | 1.24E-21   | -0.3172605 | 1.08E-05   | -0.192784  | 0.00856154 |
| 1.55E-05   | 0.90760101 | 6.84E-71   | -0.4925042 | 1.07E-12   | -0.1771442 | 0.01585662 |
| 1.21E-09   | 0.74507852 | 5.11E-34   | -0.4597535 | 4.60E-11   | -0.0418845 | 0.57134072 |
| 0.02220301 | 0.85167005 | 3.08E-53   | -0.2402071 | 0.00098991 | -0.156787  | 0.03306619 |
| 1.85E-41   | 0.84804866 | 2.35E-52   | -0.7867269 | 3.42E-40   | -0.6020647 | 1.25E-19   |
| 4.77E-12   | 0.88204136 | 1.04E-61   | -0.6434308 | 5.26E-23   | -0.4836443 | 3.09E-12   |
| 2.07E-11   | 0.81063031 | 2.12E-44   | -0.5045999 | 2.42E-13   | -0.2941269 | 4.83E-05   |
| 3.91E-07   | 0.63014088 | 7.26E-22   | -0.4087863 | 7.61E-09   | -0.5098479 | 1.24E-13   |
| 4.88E-07   | 0.8049956  | 2.34E-43   | -0.3363614 | 2.85E-06   | -0.2204932 | 0.00256207 |
| 1.95E-15   | 0.9075782  | 6.99E-71   | -0.6300031 | 7.46E-22   | -0.606423  | 5.82E-20   |
| 4.47E-23   | 0.84532688 | 1.05E-51   | -0.6258036 | 1.67E-21   | -0.522659  | 2.33E-14   |
| 2.00E-12   | 0.78193433 | 2.05E-39   | -0.5311797 | 7.35E-15   | -0.6344214 | 3.16E-22   |
| 1.36E-07   | 0.82726345 | 1.06E-47   | -0.5362944 | 3.62E-15   | -0.2452124 | 0.00076779 |
| 1.97E-28   | 0.8841037  | 2.28E-62   | -0.7418037 | 1.39E-33   | -0.515554  | 5.94E-14   |
| 1.89E-05   | 0.84694297 | 4.32E-52   | -0.4846826 | 2.73E-12   | -0.3186003 | 9.88E-06   |
| 3.55E-11   | 0.8222961  | 1.12E-46   | -0.3948034 | 2.68E-08   | -0.3301857 | 4.43E-06   |
| 6.54E-05   | 0.89575055 | 2.44E-66   | -0.3613544 | 4.34E-07   | -0.136481  | 0.06396304 |
| 0.00012339 | 0.89466433 | 5.99E-66   | -0.449763  | 1.34E-10   | -0.2003672 | 0.00624553 |
| 0.03727352 | 0.87361245 | 3.84E-59   | -0.3381339 | 2.51E-06   | -0.336587  | 2.81E-06   |
| 0.14023372 | 0.75363086 | 3.48E-35   | -0.3013828 | 3.06E-05   | -0.2897792 | 6.31E-05   |
| 0.03067101 | 0.84589031 | 7.69E-52   | -0.3386687 | 2.41E-06   | -0.0362598 | 0.62413042 |
| 8.35E-06   | 0.85730178 | 1.17E-54   | -0.5010617 | 3.76E-13   | -0.4790025 | 5.31E-12   |
| 2.69E-09   | 0.8389277  | 3.13E-50   | -0.6007497 | 1.57E-19   | -0.290032  | 6.21E-05   |
| 4.96E-17   | 0.85940128 | 3.33E-55   | -0.7422317 | 1.22E-33   | -0.5943093 | 4.75E-19   |
| 1.28E-08   | -0.4214287 | 2.32E-09   | 0.6993647  | 1.72E-28   | 0.55227424 | 3.66E-16   |
| 3.19E-23   | -0.4798175 | 4.83E-12   | 0.85650115 | 1.88E-54   | 0.41300142 | 5.15E-09   |
| 1.96E-16   | -0.3966086 | 2.29E-08   | 0.78949961 | 1.19E-40   | 0.30900751 | 1.87E-05   |
| 1.20E-09   | 0.45816972 | 5.47E-11   | -0.6713034 | 1.37E-25   | -0.1679137 | 0.022334   |
| 5.95E-19   | 0.37227117 | 1.81E-07   | -0.4589339 | 5.03E-11   | -0.3691555 | 2.33E-07   |
| 1.45E-08   | 0.48670978 | 2.15E-12   | -0.4217999 | 2.24E-09   | -0.6551063 | 4.69E-24   |
| 2.17E-25   | 0.2747521  | 0.00015383 | -0.6411349 | 8.35E-23   | -0.3145963 | 1.29E-05   |
| 1.90E-32   | 0.47001965 | 1.48E-11   | -0.6198246 | 5.12E-21   | -0.3180194 | 1.03E-05   |
| 8.70E-49   | -0.2771438 | 0.00013394 | 0.69111769 | 1.32E-27   | 0.56738613 | 3.74E-17   |
| 9.23E-25   | -0.3874503 | 5.08E-08   | 0.82800117 | 7.46E-48   | 0.50431217 | 2.50E-13   |
| 3.78E-27   | 0.33453585 | 3.25E-06   | -0.6092072 | 3.54E-20   | -0.4482712 | 1.57E-10   |
| 1.99E-12   | 0.38509114 | 6.21E-08   | -0.591627  | 7.48E-19   | -0.6925896 | 9.24E-28   |
| 1.92E-50   | -0.497476  | 5.86E-13   | 0.84579753 | 8.09E-52   | 0.41329048 | 5.01E-09   |
| 6.34E-05   | 0.43277158 | 7.64E-10   | -0.5601275 | 1.14E-16   | -0.1983649 | 0.0067952  |
| 1.00E-17   | -0.468981  | 1.66E-11   | 0.49952568 | 4.55E-13   | 0.49408607 | 8.87E-13   |
| 5.13E-22   | 0.38276581 | 7.57E-08   | -0.6193932 | 5.54E-21   | -0.3119085 | 1.55E-05   |

|            |            |            |            |            |            |            |
|------------|------------|------------|------------|------------|------------|------------|
| 5.61E-08   | 0.08885632 | 0.22906698 | 0.23495436 | 0.00128526 | -0.0658633 | 0.3730722  |
| 5.68E-10   | 0.31855318 | 9.91E-06   | -0.6431601 | 5.55E-23   | -0.2007303 | 0.00615022 |
| 4.01E-41   | 0.26454235 | 0.00027389 | -0.6610475 | 1.32E-24   | -0.4900944 | 1.44E-12   |
| 9.11E-16   | -0.4495759 | 1.37E-10   | 0.78908585 | 1.39E-40   | 0.28703716 | 7.45E-05   |
| 6.55E-41   | 0.50657511 | 1.88E-13   | -0.7832863 | 1.24E-39   | -0.3555629 | 6.81E-07   |
| 2.06E-17   | -0.3969985 | 2.21E-08   | 0.71875837 | 1.06E-30   | 0.36104305 | 4.45E-07   |
| 1.98E-26   | -0.3998463 | 1.71E-08   | 0.65870859 | 2.18E-24   | 0.29165076 | 5.63E-05   |
| 8.87E-43   | -0.4883459 | 1.77E-12   | 0.89734372 | 6.44E-67   | 0.57786617 | 7.18E-18   |
| 7.63E-06   | 0.25724011 | 0.00040808 | -0.3936995 | 2.95E-08   | -0.6221242 | 3.33E-21   |
| 2.75E-35   | 0.20769613 | 0.00455643 | -0.5659572 | 4.67E-17   | -0.2443488 | 0.00080249 |
| 8.29E-10   | 0.23846866 | 0.00107993 | -0.5503984 | 4.83E-16   | -0.2458659 | 0.00074245 |
| 0.05172879 | -0.1283272 | 0.08171643 | 0.3631642  | 3.76E-07   | -0.0706447 | 0.33929754 |
| 4.89E-41   | 0.62612082 | 1.57E-21   | -0.9176423 | 2.93E-75   | -0.7510555 | 7.91E-35   |
| 3.22E-44   | 0.42463927 | 1.70E-09   | -0.6901474 | 1.68E-27   | -0.5473749 | 7.49E-16   |
| 2.35E-12   | 0.46368738 | 2.99E-11   | -0.685545  | 5.07E-27   | -0.2987441 | 3.62E-05   |
| 6.04E-23   | -0.4452653 | 2.15E-10   | 0.87196715 | 1.16E-58   | 0.45744645 | 5.91E-11   |
| 2.09E-13   | 0.45596928 | 6.93E-11   | -0.7127521 | 5.35E-30   | -0.2220222 | 0.00238659 |
| 7.84E-17   | 0.63944723 | 1.17E-22   | -0.576185  | 9.39E-18   | -0.3809404 | 8.83E-08   |
| 1.33E-45   | -0.3627145 | 3.90E-07   | 0.66943299 | 2.08E-25   | 0.27695772 | 0.0001354  |
| 3.95E-36   | 0.43939165 | 3.92E-10   | -0.583191  | 3.03E-18   | -0.3341328 | 3.35E-06   |
| 1.15E-25   | 0.42696657 | 1.36E-09   | -0.6745613 | 6.55E-26   | -0.825767  | 2.18E-47   |
| 1.20E-26   | 0.20318663 | 0.00553885 | -0.6297649 | 7.81E-22   | -0.6633756 | 7.94E-25   |
| 3.43E-07   | 0.27122929 | 0.00018819 | -0.6526466 | 7.88E-24   | 0.00595994 | 0.93582747 |
| 8.61E-12   | 0.70829154 | 1.74E-29   | -0.5572119 | 1.76E-16   | -0.3698354 | 2.21E-07   |
| 3.97E-05   | 0.41147166 | 5.94E-09   | -0.5958096 | 3.68E-19   | -0.5671235 | 3.90E-17   |
| 2.34E-21   | -0.5189314 | 3.82E-14   | 0.85873018 | 4.99E-55   | 0.68192444 | 1.19E-26   |
| 0.0001732  | 0.26976787 | 0.00020445 | -0.5011533 | 3.72E-13   | -0.4882317 | 1.79E-12   |
| 5.38E-26   | -0.4313594 | 8.79E-10   | 0.89201664 | 5.13E-65   | 0.76364884 | 1.30E-36   |
| 2.25E-15   | -0.3732199 | 1.67E-07   | 0.74979979 | 1.18E-34   | 0.37261484 | 1.76E-07   |
| 1.88E-34   | -0.4873325 | 2.00E-12   | 0.7456976  | 4.22E-34   | 0.42080901 | 2.46E-09   |
| 4.45E-09   | 0.48111678 | 4.15E-12   | -0.6279528 | 1.11E-21   | -0.4350141 | 6.11E-10   |
| 1.13E-09   | 0.32479279 | 6.46E-06   | -0.5078394 | 1.60E-13   | -0.5493135 | 5.65E-16   |
| 6.27E-53   | 0.35706566 | 6.06E-07   | -0.7324793 | 2.21E-32   | -0.3456312 | 1.45E-06   |
| 4.92E-15   | -0.4768883 | 6.77E-12   | 0.72317854 | 3.12E-31   | 0.76661536 | 4.74E-37   |
| 4.93E-27   | -0.5249789 | 1.71E-14   | 0.93878535 | 1.27E-86   | 0.65244878 | 8.21E-24   |
| 2.16E-30   | 0.53494364 | 4.37E-15   | -0.6189699 | 6.00E-21   | -0.40235   | 1.37E-08   |
| 2.69E-16   | -0.4566378 | 6.45E-11   | 0.82068408 | 2.36E-46   | 0.53814549 | 2.79E-15   |
| 1.05E-14   | -0.4537851 | 8.75E-11   | 0.6291458  | 8.80E-22   | 0.26451063 | 0.00027437 |
| 8.32E-14   | 0.22851209 | 0.0017568  | -0.7283227 | 7.32E-32   | -0.3020629 | 2.93E-05   |
| 9.07E-15   | -0.4390344 | 4.07E-10   | 0.82617587 | 1.79E-47   | 0.54229172 | 1.55E-15   |
| 7.20E-38   | 0.3889793  | 4.45E-08   | -0.6951184 | 4.96E-28   | -0.3065114 | 2.20E-05   |
| 1.11E-19   | -0.3028426 | 2.79E-05   | 0.68659733 | 3.94E-27   | 0.44789501 | 1.63E-10   |
| 3.35E-25   | -0.2538414 | 0.00048939 | 0.68370473 | 7.84E-27   | 0.27870763 | 0.00012227 |
| 4.64E-29   | 0.3850307  | 6.25E-08   | -0.6176457 | 7.66E-21   | -0.5203618 | 3.16E-14   |
| 5.61E-36   | -0.548208  | 6.64E-16   | 0.89271414 | 2.93E-65   | 0.57655442 | 8.85E-18   |
| 1.74E-34   | 0.3671042  | 2.75E-07   | -0.6479145 | 2.10E-23   | -0.3628684 | 3.85E-07   |

|            |            |            |            |          |            |            |
|------------|------------|------------|------------|----------|------------|------------|
| 3.22E-13   | 0.3406317  | 2.09E-06   | -0.5547539 | 2.54E-16 | -0.7494817 | 1.30E-34   |
| 9.88E-16   | 0.53280464 | 5.87E-15   | -0.7153192 | 2.69E-30 | -0.2163953 | 0.0030916  |
| 1.22E-35   | -0.4997951 | 4.40E-13   | 0.78485506 | 6.93E-40 | 0.453125   | 9.39E-11   |
| 0.03785248 | 0.16862611 | 0.02176333 | -0.3384379 | 2.45E-06 | -0.3385868 | 2.43E-06   |
| 5.29E-18   | 0.44140964 | 3.19E-10   | -0.6133529 | 1.68E-20 | -0.1574063 | 0.03237062 |
| 3.89E-39   | -0.4651859 | 2.54E-11   | 0.86122769 | 1.10E-55 | 0.55406448 | 2.81E-16   |
| 4.99E-42   | -0.5075185 | 1.67E-13   | 0.84816796 | 2.20E-52 | 0.37501838 | 1.44E-07   |
| 3.55E-08   | 0.69666256 | 3.38E-28   | -0.6288862 | 9.25E-22 | -0.5071538 | 1.75E-13   |
| 2.51E-27   | 0.28833313 | 6.89E-05   | -0.5923495 | 6.62E-19 | -0.441854  | 3.05E-10   |
| 1.67E-21   | -0.5645096 | 5.83E-17   | 0.88137025 | 1.69E-61 | 0.58834459 | 1.30E-18   |
| 1.17E-30   | -0.5196147 | 3.49E-14   | 0.87687186 | 4.11E-60 | 0.40976218 | 6.96E-09   |
| 6.22E-31   | -0.3956653 | 2.49E-08   | 0.87701057 | 3.73E-60 | 0.459654   | 4.65E-11   |
| 8.34E-08   | -0.3720518 | 1.84E-07   | 0.73409916 | 1.38E-32 | 0.24814027 | 0.00066014 |
| 1.78E-29   | 0.72509332 | 1.83E-31   | -0.9303501 | 1.16E-81 | -0.6104633 | 2.83E-20   |
| 3.15E-13   | -0.3722076 | 1.82E-07   | 0.57621418 | 9.35E-18 | 0.57107373 | 2.11E-17   |
| 9.97E-25   | 0.27731731 | 0.0001326  | -0.5323676 | 6.24E-15 | -0.5026281 | 3.09E-13   |
| 2.73E-40   | -0.5613016 | 9.51E-17   | 0.92308895 | 7.22E-78 | 0.75415114 | 2.95E-35   |
| 4.21E-49   | -0.5273938 | 1.23E-14   | 0.87344217 | 4.31E-59 | 0.39211453 | 3.39E-08   |
| 2.09E-19   | -0.2738775 | 0.00016177 | 0.57483615 | 1.16E-17 | 0.80968899 | 3.18E-44   |
| 1.63E-21   | 0.59195443 | 7.08E-19   | -0.6939874 | 6.56E-28 | -0.6446339 | 4.12E-23   |
| 2.63E-10   | -0.405708  | 1.01E-08   | 0.66449601 | 6.21E-25 | 0.32170369 | 8.00E-06   |
| 7.08E-31   | 0.60346382 | 9.80E-20   | -0.9153109 | 3.38E-74 | -0.6881462 | 2.72E-27   |
| 4.26E-12   | 0.47180468 | 1.21E-11   | -0.5783154 | 6.68E-18 | -0.1154583 | 0.1175837  |
| 7.02E-10   | 0.32909448 | 4.79E-06   | -0.5972162 | 2.90E-19 | -0.0988366 | 0.1807364  |
| 0.00012586 | -0.3246127 | 6.55E-06   | 0.60428113 | 8.49E-20 | 0.15580468 | 0.03419544 |
| 9.37E-24   | -0.5243386 | 1.86E-14   | 0.88389552 | 2.66E-62 | 0.53488584 | 4.40E-15   |
| 1.02E-14   | 0.50105641 | 3.76E-13   | -0.6669172 | 3.65E-25 | -0.3102787 | 1.72E-05   |
| 2.85E-10   | 0.26804247 | 0.00022532 | -0.4048805 | 1.09E-08 | -0.4939746 | 8.99E-13   |
| 7.18E-77   | -0.522152  | 2.49E-14   | 0.92303245 | 7.70E-78 | 0.7497053  | 1.21E-34   |
| 3.14E-28   | -0.5224813 | 2.38E-14   | 0.89288202 | 2.56E-65 | 0.76041559 | 3.82E-36   |
| 1.34E-42   | -0.5850826 | 2.22E-18   | 0.94747611 | 1.56E-92 | 0.67668877 | 4.02E-26   |
| 4.68E-33   | -0.5054984 | 2.16E-13   | 0.93251468 | 7.13E-83 | 0.70897222 | 1.45E-29   |
| 2.40E-31   | -0.525635  | 1.56E-14   | 0.8718033  | 1.29E-58 | 0.45597732 | 6.92E-11   |
| 7.88E-42   | -0.4820149 | 3.74E-12   | 0.85701221 | 1.39E-54 | 0.51792783 | 4.35E-14   |
| 5.85E-64   | -0.5744046 | 1.25E-17   | 0.94922899 | 7.56E-94 | 0.66972608 | 1.95E-25   |
| 2.61E-30   | -0.1320212 | 0.07323539 | 0.74132937 | 1.60E-33 | 0.32422476 | 6.72E-06   |
| 1.44E-06   | 0.24558312 | 0.00075332 | -0.4692119 | 1.62E-11 | -0.6939746 | 6.58E-28   |
| 0.0202295  | -0.3502233 | 1.02E-06   | 0.49237208 | 1.09E-12 | 0.0335577  | 0.6502116  |
| 3.32E-14   | -0.326186  | 5.87E-06   | 0.5325937  | 6.05E-15 | -0.0619947 | 0.40185636 |
| 5.85E-27   | 0.44678667 | 1.83E-10   | -0.5418296 | 1.66E-15 | -0.1911553 | 0.00914858 |
| 3.82E-38   | -0.4575063 | 5.87E-11   | 0.80512323 | 2.22E-43 | 0.3270416  | 5.53E-06   |
| 6.86E-39   | -0.3051008 | 2.41E-05   | 0.76122907 | 2.91E-36 | 0.5589934  | 1.35E-16   |
| 1.85E-15   | 0.50175025 | 3.45E-13   | -0.8349384 | 2.42E-49 | -0.6300162 | 7.44E-22   |
| 5.37E-48   | -0.5310533 | 7.47E-15   | 0.8825425  | 7.19E-62 | 0.51804482 | 4.29E-14   |
| 0.00587802 | -0.3623129 | 4.02E-07   | 0.55510722 | 2.41E-16 | 0.43921017 | 4.00E-10   |
| 6.69E-27   | -0.2687523 | 0.0002165  | 0.58089848 | 4.40E-18 | 0.2181401  | 0.00285509 |



|            |            |            |            |            |            |            |
|------------|------------|------------|------------|------------|------------|------------|
| 4.47E-41   | 0.3030066  | 2.76E-05   | -0.6215391 | 3.72E-21   | -0.3046044 | 2.49E-05   |
| 0.00112287 | 0.57086512 | 2.18E-17   | -0.5425285 | 1.50E-15   | -0.2477499 | 0.00067364 |
| 8.80E-16   | 0.51125679 | 1.04E-13   | -0.8196279 | 3.83E-46   | -0.4430392 | 2.70E-10   |
| 1.00E-29   | -0.4613379 | 3.87E-11   | 0.82570421 | 2.24E-47   | 0.76609216 | 5.67E-37   |
| 3.60E-40   | -0.5663    | 4.43E-17   | 0.9619381  | 4.81E-105  | 0.73632333 | 7.17E-33   |
| 1.04E-24   | 0.5914601  | 7.69E-19   | -0.8760713 | 7.15E-60   | -0.5730465 | 1.55E-17   |
| 3.59E-27   | 0.48000708 | 4.72E-12   | -0.8042201 | 3.24E-43   | -0.67873   | 2.51E-26   |
| 2.28E-09   | 0.59334938 | 5.60E-19   | -0.4546971 | 7.94E-11   | -0.2339937 | 0.0013473  |
| 2.73E-13   | -0.372506  | 1.78E-07   | 0.59981633 | 1.85E-19   | 0.36592802 | 3.02E-07   |
| 9.21E-54   | -0.5131695 | 8.10E-14   | 0.79302706 | 3.01E-41   | 0.3594087  | 5.05E-07   |
| 0.0012259  | -0.3645869 | 3.36E-07   | 0.51757683 | 4.56E-14   | 0.69934618 | 1.73E-28   |
| 1.18E-38   | 0.36555021 | 3.11E-07   | -0.6025149 | 1.16E-19   | -0.3653211 | 3.17E-07   |
| 3.70E-42   | -0.4932227 | 9.85E-13   | 0.93007954 | 1.63E-81   | 0.78673278 | 3.41E-40   |
| 2.43E-47   | -0.4694083 | 1.58E-11   | 0.78959571 | 1.14E-40   | 0.48816303 | 1.81E-12   |
| 2.10E-22   | 0.53033303 | 8.25E-15   | -0.8267796 | 1.34E-47   | -0.2866651 | 7.62E-05   |
| 0.00229346 | 0.68249018 | 1.04E-26   | -0.4708861 | 1.34E-11   | -0.3478114 | 1.23E-06   |
| 4.56E-09   | 0.3066936  | 2.18E-05   | -0.463458  | 3.07E-11   | 0.21222266 | 0.00373062 |
| 2.39E-71   | -0.5440299 | 1.21E-15   | 0.9366599  | 2.61E-85   | 0.596181   | 3.46E-19   |
| 2.17E-21   | 0.45927462 | 4.85E-11   | -0.7565162 | 1.37E-35   | -0.4547185 | 7.92E-11   |
| 4.90E-27   | -0.5409729 | 1.87E-15   | 0.8119899  | 1.17E-44   | 0.49621324 | 6.84E-13   |
| 3.25E-20   | 0.77780963 | 9.28E-39   | -0.6605297 | 1.47E-24   | -0.6262516 | 1.53E-21   |
| 6.13E-43   | -0.4022098 | 1.39E-08   | 0.78790676 | 2.18E-40   | 0.35999477 | 4.83E-07   |
| 1.35E-32   | 0.41155403 | 5.89E-09   | -0.7257297 | 1.53E-31   | -0.6866189 | 3.92E-27   |
| 6.68E-43   | -0.5786738 | 6.30E-18   | 0.93495562 | 2.74E-84   | 0.6305517  | 6.71E-22   |
| 8.33E-47   | 0.50540448 | 2.18E-13   | -0.8084159 | 5.49E-44   | -0.4098197 | 6.92E-09   |
| 6.22E-56   | 0.54214845 | 1.59E-15   | -0.8048471 | 2.49E-43   | -0.491744  | 1.18E-12   |
| 4.06E-12   | 0.48086535 | 4.27E-12   | -0.8066291 | 1.18E-43   | -0.3842447 | 6.68E-08   |
| 1.33E-43   | -0.578422  | 6.56E-18   | 0.92701524 | 7.17E-80   | 0.6828789  | 9.53E-27   |
| 3.93E-11   | 0.29874299 | 3.62E-05   | -0.6848351 | 6.00E-27   | -0.5383699 | 2.71E-15   |
| 9.19E-10   | -0.3650219 | 3.25E-07   | 0.61470628 | 1.31E-20   | 0.08196793 | 0.26734586 |
| 5.86E-27   | -0.4586729 | 5.18E-11   | 0.90455001 | 1.16E-69   | 0.56211408 | 8.41E-17   |
| 2.01E-29   | -0.325736  | 6.05E-06   | 0.68407933 | 7.18E-27   | 0.77896048 | 6.11E-39   |
| 0.10374383 | -0.2209158 | 0.00251244 | 0.17700836 | 0.01593853 | 0.25491755 | 0.00046215 |
| 6.67E-28   | -0.4946941 | 8.23E-13   | 0.89768521 | 4.82E-67   | 0.77071458 | 1.15E-37   |
| 1.36E-26   | 0.26549491 | 0.00025979 | -0.6805604 | 1.64E-26   | -0.3067776 | 2.16E-05   |
| 9.23E-20   | 0.75677728 | 1.26E-35   | -0.6390136 | 1.28E-22   | -0.5714049 | 2.00E-17   |
| 2.82E-17   | -0.3489243 | 1.13E-06   | 0.80671571 | 1.13E-43   | 0.58475193 | 2.35E-18   |
| 5.80E-12   | -0.4415615 | 3.14E-10   | 0.6696362  | 1.99E-25   | 0.770211   | 1.37E-37   |
| 2.25E-30   | 0.26894911 | 0.00021412 | -0.5579509 | 1.58E-16   | -0.2421247 | 0.00089864 |
| 7.45E-25   | -0.5160579 | 5.56E-14   | 0.89193538 | 5.47E-65   | 0.4334076  | 7.17E-10   |
| 5.30E-31   | -0.2540258 | 0.00048462 | 0.64784451 | 2.14E-23   | 0.25594586 | 0.00043744 |
| 7.84E-30   | 0.37183006 | 1.88E-07   | -0.777528  | 1.03E-38   | -0.2204306 | 0.00256951 |
| 1.15E-15   | -0.4808805 | 4.27E-12   | 0.83030103 | 2.43E-48   | 0.39682436 | 2.24E-08   |
| 1.65E-44   | -0.5103016 | 1.17E-13   | 0.9488246  | 1.53E-93   | 0.58379467 | 2.74E-18   |
| 6.02E-13   | -0.2135264 | 0.00351922 | 0.66309195 | 8.45E-25   | 0.66348786 | 7.75E-25   |
| 9.65E-48   | -0.4858075 | 2.39E-12   | 0.75727082 | 1.07E-35   | 0.25494523 | 0.00046147 |

|            |            |            |            |          |            |            |
|------------|------------|------------|------------|----------|------------|------------|
| 7.78E-08   | -0.3910966 | 3.71E-08   | 0.6904024  | 1.58E-27 | 0.57733275 | 7.82E-18   |
| 0.00012215 | 0.18101775 | 0.0136698  | -0.4398697 | 3.74E-10 | -0.5979952 | 2.53E-19   |
| 3.25E-40   | -0.3456206 | 1.45E-06   | 0.86343358 | 2.82E-56 | 0.50102741 | 3.78E-13   |
| 3.90E-36   | -0.5866149 | 1.73E-18   | 0.76175981 | 2.44E-36 | 0.4517317  | 1.09E-10   |
| 1.17E-30   | 0.55827429 | 1.50E-16   | -0.8499835 | 7.99E-53 | -0.3664456 | 2.90E-07   |
| 6.96E-11   | -0.5727454 | 1.62E-17   | 0.72602439 | 1.40E-31 | 0.51726226 | 4.75E-14   |
| 1.63E-10   | -0.4282032 | 1.20E-09   | 0.61971927 | 5.22E-21 | 0.70486326 | 4.23E-29   |
| 9.93E-30   | 0.80251721 | 6.58E-43   | -0.8024575 | 6.75E-43 | -0.697674  | 2.63E-28   |
| 8.29E-07   | 0.28086885 | 0.00010769 | -0.6567712 | 3.30E-24 | -0.5599208 | 1.17E-16   |
| 8.28E-78   | -0.5683738 | 3.21E-17   | 0.87785198 | 2.07E-60 | 0.59602004 | 3.55E-19   |
| 8.15E-21   | -0.4462953 | 1.93E-10   | 0.86166024 | 8.44E-56 | 0.44692264 | 1.81E-10   |
| 4.11E-15   | 0.24857886 | 0.00064527 | -0.5572263 | 1.76E-16 | -0.6820947 | 1.15E-26   |
| 9.17E-22   | 0.52146891 | 2.73E-14   | -0.7162442 | 2.10E-30 | -0.8253838 | 2.61E-47   |
| 3.12E-34   | -0.4212666 | 2.35E-09   | 0.73706633 | 5.75E-33 | 0.25203586 | 0.00053845 |
| 1.39E-28   | -0.5326968 | 5.96E-15   | 0.84028994 | 1.54E-50 | 0.56892276 | 2.95E-17   |
| 1.58E-10   | 0.55797918 | 1.57E-16   | -0.7929338 | 3.12E-41 | -0.3972911 | 2.15E-08   |
| 7.20E-28   | 0.39530441 | 2.57E-08   | -0.7155153 | 2.55E-30 | -0.5084552 | 1.48E-13   |
| 1.27E-18   | 0.28566541 | 8.09E-05   | -0.7142183 | 3.62E-30 | -0.3407406 | 2.08E-06   |
| 4.77E-27   | 0.5204045  | 3.14E-14   | -0.8396928 | 2.10E-50 | -0.4335871 | 7.05E-10   |
| 3.07E-10   | -0.4248466 | 1.67E-09   | 0.78270193 | 1.55E-39 | 0.47710957 | 6.60E-12   |
| 1.74E-08   | 0.50985759 | 1.24E-13   | -0.6733841 | 8.56E-26 | -0.4666877 | 2.15E-11   |
| 5.88E-34   | -0.3532364 | 8.14E-07   | 0.74870703 | 1.66E-34 | 0.23454314 | 0.00131149 |
| 4.59E-09   | 0.42558342 | 1.55E-09   | -0.7416474 | 1.46E-33 | -0.6152131 | 1.20E-20   |
| 1.32E-08   | 0.68678126 | 3.77E-27   | -0.7361878 | 7.46E-33 | -0.6122227 | 2.06E-20   |
| 9.68E-18   | -0.3410302 | 2.03E-06   | 0.72630848 | 1.30E-31 | 0.70261368 | 7.53E-29   |
| 2.10E-07   | 0.50386676 | 2.65E-13   | -0.6621423 | 1.04E-24 | -0.6236467 | 2.50E-21   |
| 9.06E-28   | 0.41001863 | 6.79E-09   | -0.5430111 | 1.40E-15 | -0.3735797 | 1.63E-07   |
| 4.92E-07   | 0.07510794 | 0.3095864  | -0.3628722 | 3.85E-07 | -0.4988851 | 4.92E-13   |
| 0.00031211 | 0.36810185 | 2.54E-07   | -0.4901849 | 1.42E-12 | -0.0341983 | 0.64398792 |
| 6.76E-28   | -0.4962746 | 6.79E-13   | 0.8599335  | 2.42E-55 | 0.42722251 | 1.32E-09   |
| 2.06E-47   | -0.4220138 | 2.19E-09   | 0.69293932 | 8.48E-28 | 0.4500919  | 1.29E-10   |
| 5.71E-29   | -0.3781253 | 1.12E-07   | 0.74391758 | 7.30E-34 | 0.14992661 | 0.0416572  |
| 0.06674069 | 0.16007272 | 0.02951626 | -0.5325258 | 6.10E-15 | 0.01175728 | 0.87379658 |
| 5.81E-26   | -0.3708851 | 2.03E-07   | 0.58581395 | 1.97E-18 | 0.14685779 | 0.04606775 |
| 7.15E-17   | -0.5789039 | 6.07E-18   | 0.70543895 | 3.65E-29 | 0.43260234 | 7.77E-10   |
| 1.60E-56   | -0.5531526 | 3.22E-16   | 0.87587665 | 8.18E-60 | 0.54796546 | 6.88E-16   |
| 3.74E-56   | -0.4915408 | 1.21E-12   | 0.73295019 | 1.93E-32 | 0.37393856 | 1.58E-07   |
| 1.42E-50   | -0.5482061 | 6.64E-16   | 0.86014163 | 2.13E-55 | 0.43171162 | 8.49E-10   |
| 4.31E-05   | -0.3657671 | 3.06E-07   | 0.38125671 | 8.60E-08 | -0.0155771 | 0.83331835 |
| 1.85E-07   | -0.4089279 | 7.51E-09   | 0.74249452 | 1.13E-33 | 0.3221276  | 7.77E-06   |
| 1.19E-32   | 0.41666704 | 3.65E-09   | -0.6290398 | 8.98E-22 | -0.4931559 | 9.93E-13   |
| 3.61E-27   | 0.38299197 | 7.43E-08   | -0.5985765 | 2.29E-19 | -0.2072948 | 0.00463703 |
| 2.11E-09   | 0.38639139 | 5.56E-08   | -0.6283377 | 1.03E-21 | -0.1335055 | 0.07003537 |
| 1.95E-12   | 0.21913477 | 0.00272772 | -0.651239  | 1.06E-23 | -0.690139  | 1.68E-27   |
| 1.41E-33   | 0.42922355 | 1.09E-09   | -0.7734036 | 4.48E-38 | -0.5859239 | 1.93E-18   |
| 5.96E-14   | -0.4199565 | 2.67E-09   | 0.76053664 | 3.67E-36 | 0.72851716 | 6.92E-32   |

|            |            |            |            |          |            |            |
|------------|------------|------------|------------|----------|------------|------------|
| 6.41E-36   | -0.226534  | 0.00193049 | 0.6127151  | 1.89E-20 | 0.14541081 | 0.04827894 |
| 1.83E-29   | 0.41815319 | 3.17E-09   | -0.6892703 | 2.07E-27 | -0.4192341 | 2.86E-09   |
| 9.51E-08   | 0.21017157 | 0.00408646 | -0.5376212 | 3.01E-15 | -0.5760722 | 9.56E-18   |
| 2.58E-41   | -0.46318   | 3.16E-11   | 0.77270223 | 5.74E-38 | 0.37110722 | 1.99E-07   |
| 9.78E-32   | 0.43431118 | 6.55E-10   | -0.6291276 | 8.83E-22 | -0.7139247 | 3.91E-30   |
| 1.30E-42   | -0.5581766 | 1.52E-16   | 0.84830277 | 2.04E-52 | 0.46353055 | 3.04E-11   |
| 7.28E-12   | 0.54854659 | 6.32E-16   | -0.6344182 | 3.16E-22 | -0.6014706 | 1.39E-19   |
| 5.63E-24   | -0.5397016 | 2.24E-15   | 0.77706285 | 1.22E-38 | 0.41673287 | 3.63E-09   |
| 1.56E-44   | -0.5545593 | 2.61E-16   | 0.72743671 | 9.42E-32 | 0.28207462 | 0.00010028 |
| 1.42E-26   | -0.364171  | 3.47E-07   | 0.66394512 | 7.01E-25 | 0.11274858 | 0.12650539 |
| 6.95E-48   | -0.5860345 | 1.90E-18   | 0.93867787 | 1.48E-86 | 0.54332208 | 1.34E-15   |
| 9.52E-60   | -0.4881395 | 1.81E-12   | 0.91616252 | 1.40E-74 | 0.80697893 | 1.01E-43   |
| 1.44E-18   | 0.54567005 | 9.58E-16   | -0.7735578 | 4.25E-38 | -0.2203516 | 0.00257891 |
| 1.38E-28   | -0.4211484 | 2.38E-09   | 0.8198999  | 3.38E-46 | 0.40537289 | 1.04E-08   |
| 3.17E-53   | 0.33782742 | 2.57E-06   | -0.7810118 | 2.89E-39 | -0.3577268 | 5.76E-07   |
| 3.02E-27   | -0.4632294 | 3.15E-11   | 0.84573527 | 8.37E-52 | 0.75201335 | 5.83E-35   |
| 1.33E-35   | -0.4758618 | 7.62E-12   | 0.91508293 | 4.28E-74 | 0.6045813  | 8.05E-20   |
| 2.97E-09   | -0.4267048 | 1.39E-09   | 0.7635911  | 1.32E-36 | 0.34413702 | 1.62E-06   |
| 1.42E-06   | -0.246788  | 0.000708   | 0.4934476  | 9.58E-13 | 0.03964986 | 0.59206088 |
| 2.66E-25   | -0.2378263 | 0.00111506 | 0.76268771 | 1.79E-36 | 0.25777653 | 0.00039645 |
| 5.32E-05   | -0.1813003 | 0.01352118 | 0.55555717 | 2.25E-16 | -0.0119415 | 0.8718362  |
| 1.05E-20   | -0.4455559 | 2.08E-10   | 0.6919869  | 1.07E-27 | 0.19397013 | 0.0081553  |
| 5.84E-30   | -0.6199367 | 5.01E-21   | 0.8663031  | 4.64E-57 | 0.56408747 | 6.22E-17   |
| 4.71E-35   | -0.5356296 | 3.97E-15   | 0.94568877 | 3.07E-91 | 0.66100499 | 1.33E-24   |
| 3.13E-26   | -0.5679077 | 3.45E-17   | 0.92610627 | 2.13E-79 | 0.64797859 | 2.08E-23   |
| 1.32E-41   | 0.29184715 | 5.56E-05   | -0.7208755 | 5.91E-31 | -0.3684316 | 2.47E-07   |
| 7.09E-23   | 0.29844521 | 3.69E-05   | -0.7457693 | 4.13E-34 | -0.5920651 | 6.95E-19   |
| 2.66E-59   | -0.5859597 | 1.92E-18   | 0.85931849 | 3.51E-55 | 0.50769241 | 1.63E-13   |
| 4.08E-67   | -0.4982503 | 5.33E-13   | 0.78127684 | 2.62E-39 | 0.48636592 | 2.24E-12   |
| 1.74E-21   | -0.5154113 | 6.05E-14   | 0.84060704 | 1.30E-50 | 0.76601613 | 5.82E-37   |
| 3.73E-13   | -0.4694759 | 1.57E-11   | 0.82226705 | 1.13E-46 | 0.58034415 | 4.81E-18   |
| 5.59E-35   | -0.345671  | 1.44E-06   | 0.67521005 | 5.65E-26 | 0.2304556  | 0.00160015 |
| 0.04971904 | -0.3918588 | 3.47E-08   | 0.54212801 | 1.59E-15 | 0.44272586 | 2.79E-10   |
| 0.08645381 | -0.117043  | 0.11259754 | 0.40495861 | 1.08E-08 | -0.1131716 | 0.12507927 |
| 2.48E-41   | -0.5119113 | 9.52E-14   | 0.87054586 | 2.97E-58 | 0.38842098 | 4.67E-08   |
| 1.80E-10   | -0.4365757 | 5.22E-10   | 0.62838609 | 1.02E-21 | 0.31786539 | 1.04E-05   |
| 1.85E-08   | 0.23064282 | 0.00158576 | -0.4704251 | 1.41E-11 | -0.2210339 | 0.00249873 |
| 8.48E-17   | -0.4376625 | 4.68E-10   | 0.70886662 | 1.49E-29 | 0.25010962 | 0.00059576 |
| 2.08E-15   | 0.48374506 | 3.05E-12   | -0.6708183 | 1.53E-25 | -0.7034623 | 6.06E-29   |
| 6.40E-12   | -0.4144991 | 4.48E-09   | 0.75004375 | 1.09E-34 | 0.25927441 | 0.0003656  |
| 9.43E-43   | -0.3882886 | 4.73E-08   | 0.81020253 | 2.55E-44 | 0.51641551 | 5.31E-14   |
| 3.20E-38   | 0.3221488  | 7.76E-06   | -0.6564344 | 3.54E-24 | -0.3678821 | 2.58E-07   |
| 1.19E-53   | -0.4608196 | 4.10E-11   | 0.71546055 | 2.59E-30 | 0.35847984 | 5.43E-07   |
| 7.87E-62   | -0.5494484 | 5.54E-16   | 0.93227136 | 9.80E-83 | 0.60778643 | 4.57E-20   |
| 1.25E-23   | -0.4412538 | 3.24E-10   | 0.68512713 | 5.60E-27 | 0.84895782 | 1.42E-52   |
| 6.69E-12   | -0.4153885 | 4.12E-09   | 0.7894904  | 1.19E-40 | 0.5440059  | 1.22E-15   |

|            |            |            |            |           |            |            |
|------------|------------|------------|------------|-----------|------------|------------|
| 1.81E-09   | 0.42801291 | 1.22E-09   | -0.5271629 | 1.27E-14  | 0.13618691 | 0.06454326 |
| 1.61E-14   | -0.2332904 | 0.00139444 | 0.71716388 | 1.63E-30  | 0.35341788 | 8.03E-07   |
| 0.19204684 | -0.3091496 | 1.85E-05   | 0.38693603 | 5.31E-08  | 0.27001371 | 0.00020163 |
| 3.66E-18   | -0.2512982 | 0.00055976 | 0.7020499  | 8.70E-29  | 0.18842188 | 0.01021419 |
| 0.0049028  | 0.21258024 | 0.00367153 | -0.452113  | 1.05E-10  | -0.5517314 | 3.97E-16   |
| 8.14E-28   | -0.3323904 | 3.79E-06   | 0.53830509 | 2.73E-15  | 0.796197   | 8.59E-42   |
| 6.35E-17   | -0.424569  | 1.71E-09   | 0.74258266 | 1.10E-33  | 0.78246999 | 1.69E-39   |
| 1.51E-29   | -0.4728725 | 1.07E-11   | 0.84871812 | 1.62E-52  | 0.74296594 | 9.76E-34   |
| 2.84E-05   | -0.2933393 | 5.07E-05   | 0.43328804 | 7.26E-10  | 0.24539223 | 0.00076073 |
| 7.69E-05   | -0.3603463 | 4.70E-07   | 0.61859167 | 6.43E-21  | 0.58945439 | 1.08E-18   |
| 2.73E-19   | -0.4334799 | 7.12E-10   | 0.56561859 | 4.92E-17  | 0.68343903 | 8.35E-27   |
| 2.06E-42   | -0.4033451 | 1.25E-08   | 0.81335078 | 6.44E-45  | 0.7749334  | 2.61E-38   |
| 1.92E-10   | 0.40252042 | 1.35E-08   | -0.6919549 | 1.08E-27  | -0.2500672 | 0.00059709 |
| 4.62E-38   | -0.0587673 | 0.42685116 | 0.69704349 | 3.07E-28  | 0.39604411 | 2.40E-08   |
| 2.36E-40   | -0.5974791 | 2.77E-19   | 0.92619175 | 1.93E-79  | 0.66446742 | 6.25E-25   |
| 7.90E-33   | 0.51998332 | 3.32E-14   | -0.9295537 | 3.16E-81  | -0.6536009 | 6.45E-24   |
| 1.93E-29   | -0.2516232 | 0.00055028 | 0.70790516 | 1.92E-29  | 0.32151657 | 8.10E-06   |
| 4.85E-23   | -0.4713067 | 1.28E-11   | 0.83061908 | 2.08E-48  | 0.28305625 | 9.46E-05   |
| 1.33E-20   | 0.36415787 | 3.48E-07   | -0.6916064 | 1.18E-27  | -0.5333253 | 5.47E-15   |
| 3.11E-07   | 0.60269261 | 1.12E-19   | -0.5949247 | 4.28E-19  | -0.3719468 | 1.86E-07   |
| 1.58E-40   | -0.4970631 | 6.16E-13   | 0.84431451 | 1.81E-51  | 0.50782259 | 1.61E-13   |
| 7.31E-14   | 0.36209579 | 4.09E-07   | -0.5324584 | 6.16E-15  | -0.1091245 | 0.13924368 |
| 7.08E-16   | 0.34095873 | 2.04E-06   | -0.4859216 | 2.36E-12  | -0.1456325 | 0.04793457 |
| 1.93E-33   | -0.4896944 | 1.51E-12   | 0.77732599 | 1.11E-38  | 0.44947096 | 1.38E-10   |
| 1.45E-28   | 0.47593413 | 7.56E-12   | -0.6840122 | 7.29E-27  | -0.5615632 | 9.14E-17   |
| 5.46E-32   | -0.5071496 | 1.75E-13   | 0.93853002 | 1.84E-86  | 0.62981726 | 7.73E-22   |
| 2.83E-58   | -0.5654844 | 5.02E-17   | 0.96376664 | 5.78E-107 | 0.71132348 | 7.82E-30   |
| 1.23E-42   | 0.5304925  | 8.07E-15   | -0.871129  | 2.02E-58  | -0.7630984 | 1.56E-36   |
| 2.98E-39   | 0.3254572  | 6.17E-06   | -0.6264355 | 1.48E-21  | -0.4550561 | 7.64E-11   |
| 5.54E-52   | 0.3708667  | 2.03E-07   | -0.7067108 | 2.62E-29  | -0.5370529 | 3.26E-15   |
| 3.04E-42   | 0.17629177 | 0.01637689 | -0.6183134 | 6.77E-21  | -0.3890522 | 4.43E-08   |
| 1.77E-57   | -0.5590382 | 1.34E-16   | 0.96800676 | 7.95E-112 | 0.68120724 | 1.41E-26   |
| 4.17E-15   | -0.5367205 | 3.41E-15   | 0.78425292 | 8.68E-40  | 0.49538725 | 7.57E-13   |
| 1.07E-36   | -0.473135  | 1.04E-11   | 0.80218979 | 7.53E-43  | 0.36200658 | 4.12E-07   |
| 3.15E-42   | -0.2812546 | 0.00010526 | 0.61867647 | 6.33E-21  | 0.25348535 | 0.00049872 |
| 1.64E-21   | -0.4305853 | 9.50E-10   | 0.74571603 | 4.20E-34  | 0.26817198 | 0.00022369 |
| 0.00025612 | -0.373018  | 1.70E-07   | 0.42804749 | 1.22E-09  | 0.15005324 | 0.04148311 |
| 0.0136377  | -0.1719351 | 0.01927477 | 0.56304862 | 7.29E-17  | 0.38282305 | 7.53E-08   |
| 1.44E-09   | -0.2805556 | 0.0001097  | 0.71325774 | 4.68E-30  | 0.57498358 | 1.14E-17   |
| 3.32E-34   | -0.5116342 | 9.87E-14   | 0.8333716  | 5.32E-49  | 0.45532301 | 7.43E-11   |
| 1.53E-27   | -0.4080093 | 8.18E-09   | 0.84096014 | 1.08E-50  | 0.37929721 | 1.01E-07   |
| 6.23E-17   | 0.42505803 | 1.63E-09   | -0.6775716 | 3.28E-26  | -0.0638339 | 0.38801025 |
| 2.41E-33   | -0.5649595 | 5.44E-17   | 0.89235736 | 3.90E-65  | 0.46392697 | 2.91E-11   |
| 1.29E-59   | 0.47250305 | 1.12E-11   | -0.7552385 | 2.08E-35  | -0.3607255 | 4.56E-07   |
| 7.71E-44   | -0.5154945 | 5.99E-14   | 0.82635484 | 1.64E-47  | 0.45166242 | 1.10E-10   |
| 3.77E-14   | 0.52692778 | 1.31E-14   | -0.8145399 | 3.80E-45  | -0.5423365 | 1.54E-15   |

|            |            |            |            |          |            |            |
|------------|------------|------------|------------|----------|------------|------------|
| 1.41E-10   | -0.4126254 | 5.33E-09   | 0.74356951 | 8.12E-34 | 0.5793081  | 5.69E-18   |
| 1.51E-08   | 0.34677422 | 1.33E-06   | -0.6603856 | 1.52E-24 | -0.3921688 | 3.38E-08   |
| 1.12E-11   | 0.38779442 | 4.93E-08   | -0.7774077 | 1.07E-38 | -0.4271629 | 1.33E-09   |
| 1.71E-30   | -0.5090237 | 1.38E-13   | 0.86178185 | 7.84E-56 | 0.69756721 | 2.70E-28   |
| 0.00552321 | 0.18311971 | 0.01259751 | -0.3252717 | 6.25E-06 | -0.2493045 | 0.00062135 |
| 4.37E-21   | 0.60133337 | 1.42E-19   | -0.5663627 | 4.38E-17 | -0.2683744 | 0.00022116 |
| 2.22E-33   | 0.60005691 | 1.77E-19   | -0.9338493 | 1.22E-83 | -0.7152566 | 2.74E-30   |
| 1.09E-15   | -0.4433994 | 2.60E-10   | 0.5996168  | 1.91E-19 | 0.64696118 | 2.56E-23   |
| 1.47E-20   | -0.422257  | 2.14E-09   | 0.63210031 | 4.97E-22 | 0.66973837 | 1.95E-25   |
| 0.08599808 | 0.29048464 | 6.04E-05   | -0.5359475 | 3.80E-15 | -0.1320094 | 0.07326139 |
| 1.73E-11   | 0.41018768 | 6.69E-09   | -0.7481311 | 1.98E-34 | -0.2480198 | 0.00066428 |
| 4.66E-34   | 0.5383765  | 2.70E-15   | -0.7209388 | 5.81E-31 | -0.5642062 | 6.11E-17   |
| 6.63E-50   | -0.5760223 | 9.64E-18   | 0.95414187 | 8.56E-98 | 0.67384938 | 7.70E-26   |
| 1.19E-12   | -0.5171349 | 4.83E-14   | 0.83802122 | 5.00E-50 | 0.58880853 | 1.20E-18   |
| 3.35E-27   | -0.4197926 | 2.71E-09   | 0.83413819 | 3.62E-49 | 0.59235183 | 6.62E-19   |
| 3.14E-40   | -0.4390187 | 4.08E-10   | 0.77348734 | 4.35E-38 | 0.4010326  | 1.54E-08   |
| 3.08E-09   | -0.071192  | 0.33556021 | 0.61859323 | 6.43E-21 | 0.232027   | 0.00148293 |
| 5.79E-11   | 0.2550148  | 0.00045976 | -0.512014  | 9.40E-14 | -0.4260802 | 1.48E-09   |
| 1.78E-34   | 0.31872028 | 9.80E-06   | -0.7265232 | 1.22E-31 | -0.4939263 | 9.04E-13   |
| 0.00173517 | -0.2634802 | 0.00029045 | 0.50880373 | 1.42E-13 | 0.50906441 | 1.37E-13   |
| 1.38E-20   | -0.2485753 | 0.00064539 | 0.60053432 | 1.63E-19 | 0.27538111 | 0.00014835 |
| 1.71E-45   | -0.4836545 | 3.08E-12   | 0.89158426 | 7.24E-65 | 0.44564214 | 2.06E-10   |
| 2.58E-17   | -0.4650371 | 2.58E-11   | 0.74526391 | 4.83E-34 | 0.25363301 | 0.00049483 |
| 6.00E-30   | 0.62336645 | 2.64E-21   | -0.7577135 | 9.28E-36 | -0.5047646 | 2.37E-13   |
| 4.94E-23   | 0.24881455 | 0.00063741 | -0.5761816 | 9.39E-18 | -0.5528365 | 3.37E-16   |
| 0.24685639 | -0.3852463 | 6.13E-08   | 0.50208822 | 3.31E-13 | 0.41719201 | 3.47E-09   |
| 7.23E-06   | 0.63181623 | 5.25E-22   | -0.5120762 | 9.32E-14 | -0.1574804 | 0.03228822 |
| 5.22E-23   | 0.48890608 | 1.66E-12   | -0.8533494 | 1.18E-53 | -0.5980876 | 2.49E-19   |
| 6.84E-11   | -0.5075778 | 1.66E-13   | 0.77914535 | 5.72E-39 | 0.62722943 | 1.27E-21   |
| 6.71E-41   | -0.3563936 | 6.39E-07   | 0.64293014 | 5.82E-23 | 0.52118462 | 2.83E-14   |
| 1.50E-49   | 0.46756513 | 1.95E-11   | -0.7288084 | 6.37E-32 | -0.4899513 | 1.46E-12   |
| 5.88E-33   | 0.54339969 | 1.33E-15   | -0.7579051 | 8.72E-36 | -0.8457038 | 8.52E-52   |
| 9.45E-45   | -0.3405684 | 2.10E-06   | 0.67751602 | 3.33E-26 | 0.43622014 | 5.41E-10   |
| 1.04E-25   | -0.4820247 | 3.73E-12   | 0.77891117 | 6.22E-39 | 0.44719927 | 1.75E-10   |
| 0.00120616 | -0.3248636 | 6.43E-06   | 0.5783299  | 6.66E-18 | 0.56724794 | 3.82E-17   |
| 3.76E-06   | -0.4319045 | 8.33E-10   | 0.71811526 | 1.26E-30 | 0.50424272 | 2.53E-13   |
| 4.05E-57   | -0.4501728 | 1.28E-10   | 0.86525233 | 9.03E-57 | 0.60454401 | 8.11E-20   |
| 1.14E-10   | -0.4077355 | 8.39E-09   | 0.74236884 | 1.17E-33 | 0.30343792 | 2.69E-05   |
| 4.74E-17   | 0.47063025 | 1.38E-11   | -0.6946331 | 5.59E-28 | -0.3311178 | 4.15E-06   |
| 3.59E-40   | -0.317104  | 1.09E-05   | 0.65496149 | 4.84E-24 | 0.26117656 | 0.00032962 |
| 8.55E-28   | 0.5367611  | 3.39E-15   | -0.6397189 | 1.11E-22 | -0.3298624 | 4.54E-06   |
| 1.27E-32   | -0.5204679 | 3.11E-14   | 0.91768731 | 2.79E-75 | 0.71325112 | 4.68E-30   |
| 5.77E-23   | -0.4042072 | 1.16E-08   | 0.67458603 | 6.51E-26 | 0.20861903 | 0.00437582 |
| 0.85174169 | -0.2869263 | 7.50E-05   | 0.3769913  | 1.23E-07 | 0.42499653 | 1.64E-09   |
| 1.00E-34   | -0.5037831 | 2.68E-13   | 0.9231393  | 6.81E-78 | 0.7352415  | 9.86E-33   |
| 1.76E-14   | 0.3627007  | 3.90E-07   | -0.7011562 | 1.09E-28 | -0.5372843 | 3.15E-15   |

|            |            |            |            |          |            |            |
|------------|------------|------------|------------|----------|------------|------------|
| 4.49E-18   | 0.37439128 | 1.52E-07   | -0.753156  | 4.05E-35 | -0.6615297 | 1.19E-24   |
| 4.77E-28   | 0.51179479 | 9.67E-14   | -0.8557239 | 2.97E-54 | -0.6783323 | 2.75E-26   |
| 4.41E-28   | 0.30092639 | 3.15E-05   | -0.7192783 | 9.17E-31 | -0.6239752 | 2.35E-21   |
| 3.09E-35   | 0.38173943 | 8.26E-08   | -0.677213  | 3.57E-26 | -0.3606221 | 4.60E-07   |
| 3.25E-29   | 0.29841458 | 3.70E-05   | -0.5864102 | 1.79E-18 | -0.1720047 | 0.01922516 |
| 2.59E-07   | 0.28545321 | 8.20E-05   | -0.6216533 | 3.64E-21 | -0.0265334 | 0.71996124 |
| 2.60E-46   | 0.48780045 | 1.89E-12   | -0.7406222 | 1.99E-33 | -0.540105  | 2.12E-15   |
| 1.57E-38   | 0.40273816 | 1.32E-08   | -0.7869029 | 3.20E-40 | -0.5767072 | 8.64E-18   |
| 2.20E-17   | -0.4428864 | 2.74E-10   | 0.76786376 | 3.09E-37 | 0.73112835 | 3.27E-32   |
| 7.78E-28   | 0.38782526 | 4.92E-08   | -0.7502178 | 1.03E-34 | -0.7144745 | 3.38E-30   |
| 1.78E-14   | 0.34787991 | 1.22E-06   | -0.7958781 | 9.75E-42 | -0.5241075 | 1.92E-14   |
| 2.17E-38   | 0.37288445 | 1.72E-07   | -0.8194744 | 4.11E-46 | -0.797786  | 4.54E-42   |
| 4.90E-18   | -0.3991488 | 1.82E-08   | 0.69833426 | 2.23E-28 | 0.4626605  | 3.35E-11   |
| 1.84E-51   | -0.583454  | 2.90E-18   | 0.91192604 | 1.04E-72 | 0.4921818  | 1.12E-12   |
| 2.83E-34   | -0.5454187 | 9.94E-16   | 0.63905671 | 1.27E-22 | 0.2374964  | 0.0011335  |
| 2.01E-21   | -0.3706793 | 2.06E-07   | 0.72608662 | 1.38E-31 | 0.6218928  | 3.48E-21   |
| 2.09E-13   | 0.57969279 | 5.35E-18   | -0.6255568 | 1.74E-21 | -0.3947215 | 2.70E-08   |
| 7.26E-28   | -0.61042   | 2.85E-20   | 0.79583794 | 9.91E-42 | 0.29333185 | 5.07E-05   |
| 2.41E-21   | -0.6576934 | 2.71E-24   | 0.81713549 | 1.19E-45 | 0.45761748 | 5.80E-11   |
| 0.00063727 | 0.2758855  | 0.00014408 | -0.4217357 | 2.25E-09 | -0.3963533 | 2.34E-08   |
| 2.80E-05   | -0.3641675 | 3.47E-07   | 0.62585916 | 1.65E-21 | 0.4464766  | 1.89E-10   |
| 1.21E-18   | -0.3967788 | 2.25E-08   | 0.75744212 | 1.01E-35 | 0.26887179 | 0.00021505 |
| 0.00876105 | -0.3004525 | 3.25E-05   | 0.39109164 | 3.71E-08 | 0.72185301 | 4.51E-31   |
| 1.71E-22   | -0.2034656 | 0.00547297 | 0.59920411 | 2.06E-19 | 0.17830404 | 0.01517187 |
| 1.28E-17   | -0.4418225 | 3.06E-10   | 0.63483907 | 2.91E-22 | 0.18095541 | 0.01370279 |
| 2.27E-39   | -0.50544   | 2.17E-13   | 0.76672287 | 4.57E-37 | 0.38089644 | 8.86E-08   |
| 3.75E-20   | 0.15531107 | 0.03477511 | -0.5404875 | 2.01E-15 | -0.7271066 | 1.03E-31   |
| 8.32E-41   | -0.5654945 | 5.01E-17   | 0.92670901 | 1.04E-79 | 0.59847301 | 2.33E-19   |
| 0.04052533 | -0.2854656 | 8.19E-05   | 0.42904229 | 1.11E-09 | 0.19912748 | 0.00658096 |
| 9.00E-20   | 0.47270882 | 1.09E-11   | -0.6903693 | 1.59E-27 | -0.0916934 | 0.21448448 |
| 1.72E-29   | -0.5040403 | 2.59E-13   | 0.91906243 | 6.38E-76 | 0.67505573 | 5.85E-26   |
| 6.12E-32   | -0.4377901 | 4.62E-10   | 0.79039163 | 8.40E-41 | 0.46873633 | 1.71E-11   |
| 3.00E-30   | -0.5079787 | 1.58E-13   | 0.83084596 | 1.86E-48 | 0.35234597 | 8.72E-07   |
| 1.90E-34   | -0.3378959 | 2.55E-06   | 0.65547343 | 4.34E-24 | 0.1986056  | 0.00672691 |
| 3.78E-23   | 0.4791245  | 5.23E-12   | -0.8918737 | 5.75E-65 | -0.4031379 | 1.27E-08   |
| 7.42E-22   | -0.2242447 | 0.00215093 | 0.57579278 | 1.00E-17 | 0.15857766 | 0.03108906 |
| 1.25E-31   | 0.28821356 | 6.94E-05   | -0.7187865 | 1.05E-30 | -0.4751699 | 8.25E-12   |
| 3.04E-11   | 0.41546155 | 4.09E-09   | -0.6635444 | 7.65E-25 | -0.6100481 | 3.05E-20   |
| 3.02E-12   | -0.5068608 | 1.82E-13   | 0.76640234 | 5.10E-37 | 0.41579094 | 3.96E-09   |
| 3.16E-34   | -0.4039055 | 1.19E-08   | 0.70437497 | 4.80E-29 | 0.2095536  | 0.00419951 |
| 1.30E-21   | -0.5100325 | 1.21E-13   | 0.68954053 | 1.94E-27 | 0.44611019 | 1.96E-10   |
| 1.15E-19   | -0.5024344 | 3.17E-13   | 0.66889584 | 2.35E-25 | 0.40851792 | 7.80E-09   |
| 8.11E-11   | 0.48911223 | 1.62E-12   | -0.7814163 | 2.49E-39 | -0.4487975 | 1.48E-10   |
| 5.56E-12   | -0.4101126 | 6.74E-09   | 0.75713053 | 1.12E-35 | 0.72978473 | 4.82E-32   |
| 6.01E-19   | -0.4298202 | 1.02E-09   | 0.63622629 | 2.22E-22 | 0.63877135 | 1.34E-22   |
| 7.13E-23   | 0.3571866  | 6.01E-07   | -0.7935652 | 2.44E-41 | -0.6023661 | 1.19E-19   |

|            |            |            |            |          |            |            |
|------------|------------|------------|------------|----------|------------|------------|
| 7.09E-32   | -0.4811617 | 4.13E-12   | 0.84638106 | 5.88E-52 | 0.44605351 | 1.98E-10   |
| 1.43E-05   | -0.2749002 | 0.00015252 | 0.68720104 | 3.41E-27 | 0.48905989 | 1.63E-12   |
| 8.46E-36   | -0.5470589 | 7.84E-16   | 0.74519567 | 4.93E-34 | 0.65924027 | 1.94E-24   |
| 0.00019745 | -0.4715482 | 1.24E-11   | 0.49001977 | 1.45E-12 | 0.48709826 | 2.05E-12   |
| 1.35E-33   | -0.5191305 | 3.72E-14   | 0.9409896  | 4.90E-88 | 0.7281023  | 7.79E-32   |
| 1.69E-28   | -0.4403794 | 3.55E-10   | 0.72119518 | 5.41E-31 | 0.2467975  | 0.00070765 |
| 2.45E-64   | -0.543617  | 1.29E-15   | 0.92323143 | 6.13E-78 | 0.50109453 | 3.75E-13   |
| 1.02E-15   | -0.5259291 | 1.50E-14   | 0.80178295 | 8.91E-43 | 0.7821698  | 1.88E-39   |
| 1.04E-14   | -0.5613571 | 9.43E-17   | 0.63130386 | 5.80E-22 | 0.2807349  | 0.00010854 |
| 5.89E-13   | -0.4418071 | 3.07E-10   | 0.68674465 | 3.81E-27 | 0.87379472 | 3.39E-59   |
| 2.26E-26   | 0.3711331  | 1.99E-07   | -0.6957757 | 4.21E-28 | -0.3433291 | 1.72E-06   |
| 2.61E-05   | -0.1795351 | 0.01447347 | 0.46993269 | 1.49E-11 | 0.07099685 | 0.33688971 |
| 3.86E-25   | -0.3894063 | 4.29E-08   | 0.6628326  | 8.94E-25 | 0.06938975 | 0.34796823 |
| 1.88E-37   | -0.520152  | 3.25E-14   | 0.70157408 | 9.82E-29 | 0.25872068 | 0.00037673 |
| 8.19E-34   | 0.47160365 | 1.24E-11   | -0.8668274 | 3.32E-57 | -0.3629108 | 3.84E-07   |
| 0.04885809 | 0.28519849 | 8.32E-05   | -0.5410121 | 1.86E-15 | -0.3242275 | 6.72E-06   |
| 1.06E-38   | -0.3999676 | 1.70E-08   | 0.71391692 | 3.92E-30 | 0.27435703 | 0.00015737 |
| 7.53E-13   | -0.0280175 | 0.70500687 | 0.68171092 | 1.25E-26 | 0.57607984 | 9.55E-18   |
| 1.56E-18   | -0.3871875 | 5.20E-08   | 0.83923025 | 2.67E-50 | 0.37012688 | 2.15E-07   |
| 1.21E-35   | -0.3052418 | 2.39E-05   | 0.58000471 | 5.08E-18 | 0.09940256 | 0.17824003 |
| 3.60E-19   | -0.2497885 | 0.00060585 | 0.41552206 | 4.07E-09 | -0.0477873 | 0.51831781 |
| 7.39E-31   | -0.4099973 | 6.81E-09   | 0.72232719 | 3.95E-31 | 0.14585735 | 0.04758732 |
| 2.17E-16   | 0.79510528 | 1.33E-41   | -0.6728139 | 9.74E-26 | -0.5008067 | 3.88E-13   |
| 8.89E-06   | 0.36494741 | 3.27E-07   | -0.5064137 | 1.92E-13 | 0.05724822 | 0.43892048 |
| 4.25E-25   | 0.81459981 | 3.70E-45   | -0.7772967 | 1.12E-38 | -0.4137831 | 4.79E-09   |
| 3.67E-16   | 0.39788847 | 2.04E-08   | -0.7642478 | 1.06E-36 | -0.6355138 | 2.55E-22   |
| 6.97E-42   | -0.4455782 | 2.08E-10   | 0.75616033 | 1.54E-35 | 0.26490628 | 0.00026842 |
| 8.44E-37   | -0.4440808 | 2.43E-10   | 0.92764199 | 3.35E-80 | 0.71345159 | 4.44E-30   |
| 2.56E-54   | -0.5895242 | 1.06E-18   | 0.88354576 | 3.44E-62 | 0.65831103 | 2.37E-24   |
| 9.38E-06   | -0.3851428 | 6.19E-08   | 0.53681465 | 3.37E-15 | 0.07953329 | 0.28186317 |
| 4.80E-16   | 0.30531479 | 2.38E-05   | -0.6447787 | 4.00E-23 | -0.6598134 | 1.72E-24   |
| 2.13E-07   | -0.3939369 | 2.89E-08   | 0.59997285 | 1.80E-19 | 0.80453827 | 2.84E-43   |
| 2.86E-34   | -0.4865952 | 2.18E-12   | 0.90760264 | 6.83E-71 | 0.62898054 | 9.08E-22   |
| 3.65E-38   | 0.38852126 | 4.63E-08   | -0.7594438 | 5.26E-36 | -0.3412561 | 2.00E-06   |
| 1.61E-29   | 0.23211108 | 0.00147689 | -0.7000641 | 1.44E-28 | -0.621685  | 3.62E-21   |
| 0.26435645 | 0.58167523 | 3.88E-18   | -0.3644431 | 3.40E-07 | -0.4718835 | 1.20E-11   |
| 6.31E-08   | 0.58708392 | 1.60E-18   | -0.6412222 | 8.21E-23 | -0.665673  | 4.80E-25   |
| 0.13011105 | -0.3480479 | 1.21E-06   | 0.47649899 | 7.08E-12 | 0.25681181 | 0.00041759 |
| 4.88E-11   | 0.37850336 | 1.08E-07   | -0.695755  | 4.24E-28 | -0.4010799 | 1.53E-08   |
| 2.90E-31   | -0.3481174 | 1.20E-06   | 0.66316151 | 8.32E-25 | 0.32732714 | 5.42E-06   |
| 0.00275126 | -0.4075348 | 8.54E-09   | 0.58986292 | 1.01E-18 | 0.07607857 | 0.30335781 |
| 1.39E-45   | -0.5237477 | 2.01E-14   | 0.87304302 | 5.64E-59 | 0.66471174 | 5.93E-25   |
| 2.16E-40   | 0.3042131  | 2.55E-05   | -0.5677787 | 3.52E-17 | -0.3734415 | 1.64E-07   |
| 8.80E-27   | 0.1816716  | 0.01332799 | -0.5596656 | 1.22E-16 | -0.2112641 | 0.00389329 |
| 5.14E-09   | -0.3993605 | 1.79E-08   | 0.6478196  | 2.15E-23 | 0.68053359 | 1.65E-26   |
| 0.00059817 | 0.47611167 | 7.40E-12   | -0.4827745 | 3.42E-12 | -0.3382514 | 2.49E-06   |

|            |            |            |            |            |            |            |
|------------|------------|------------|------------|------------|------------|------------|
| 8.00E-24   | -0.1215002 | 0.09945745 | 0.55286546 | 3.36E-16   | 0.12118639 | 0.10034094 |
| 3.89E-70   | -0.479952  | 4.75E-12   | 0.89944063 | 1.08E-67   | 0.60387507 | 9.12E-20   |
| 6.49E-12   | -0.3836234 | 7.04E-08   | 0.73347905 | 1.65E-32   | 0.16038325 | 0.02919823 |
| 7.40E-19   | 0.25188422 | 0.00054277 | -0.5225786 | 2.35E-14   | 0.10818822 | 0.14268885 |
| 7.14E-55   | -0.5449649 | 1.06E-15   | 0.82515684 | 2.91E-47   | 0.43082724 | 9.27E-10   |
| 1.58E-17   | -0.4369274 | 5.04E-10   | 0.77683179 | 1.32E-38   | 0.58856732 | 1.25E-18   |
| 8.74E-46   | 0.32493531 | 6.40E-06   | -0.7851429 | 6.22E-40   | -0.5276145 | 1.19E-14   |
| 4.35E-33   | -0.5161609 | 5.49E-14   | 0.91343716 | 2.30E-73   | 0.59047391 | 9.08E-19   |
| 3.00E-20   | -0.2723857 | 0.00017619 | 0.78757337 | 2.48E-40   | 0.47840371 | 5.69E-12   |
| 8.44E-24   | -0.4604076 | 4.29E-11   | 0.81838797 | 6.75E-46   | 0.47536443 | 8.07E-12   |
| 4.38E-07   | 0.41242099 | 5.44E-09   | -0.6097073 | 3.24E-20   | -0.6268215 | 1.37E-21   |
| 0.49577619 | 0.1292566  | 0.07951153 | -0.2568219 | 0.00041736 | -0.3993267 | 1.80E-08   |
| 1.10E-18   | 0.68314008 | 8.96E-27   | -0.7918377 | 4.79E-41   | -0.5236261 | 2.05E-14   |
| 6.10E-34   | 0.4531466  | 9.37E-11   | -0.8480206 | 2.39E-52   | -0.667007  | 3.57E-25   |
| 2.91E-15   | 0.33471456 | 3.21E-06   | -0.6516869 | 9.63E-24   | -0.6898174 | 1.82E-27   |
| 2.09E-09   | -0.1897308 | 0.00969096 | 0.40931361 | 7.25E-09   | 0.12197474 | 0.09813305 |
| 2.74E-35   | -0.4722348 | 1.15E-11   | 0.88744254 | 1.84E-63   | 0.36632038 | 2.93E-07   |
| 5.88E-13   | -0.2860836 | 7.89E-05   | 0.6782414  | 2.81E-26   | 0.08805562 | 0.23330637 |
| 0.00818205 | 0.2253661  | 0.00204024 | -0.4213546 | 2.33E-09   | 0.17162769 | 0.01949506 |
| 4.82E-24   | -0.3507001 | 9.88E-07   | 0.67663518 | 4.07E-26   | 0.76316498 | 1.53E-36   |
| 0.00448196 | -0.2418737 | 0.00091013 | 0.38400624 | 6.82E-08   | 0.47998227 | 4.74E-12   |
| 7.68E-22   | 0.335619   | 3.01E-06   | -0.6370737 | 1.88E-22   | -0.6349138 | 2.87E-22   |
| 4.01E-19   | 0.36330255 | 3.72E-07   | -0.7910495 | 6.51E-41   | -0.6640819 | 6.80E-25   |
| 1.10E-13   | -0.5235273 | 2.07E-14   | 0.74849994 | 1.77E-34   | 0.46604774 | 2.30E-11   |
| 4.39E-20   | -0.4417348 | 3.09E-10   | 0.80322683 | 4.90E-43   | 0.46899734 | 1.66E-11   |
| 5.65E-42   | -0.5940286 | 4.99E-19   | 0.91177988 | 1.20E-72   | 0.58465963 | 2.38E-18   |
| 2.82E-16   | -0.3447656 | 1.54E-06   | 0.53537571 | 4.11E-15   | 0.10719656 | 0.14640799 |
| 1.18E-11   | 0.38975848 | 4.16E-08   | -0.7864327 | 3.82E-40   | -0.4544376 | 8.16E-11   |
| 0.00139644 | 0.29891536 | 3.58E-05   | -0.5480464 | 6.80E-16   | -0.1620104 | 0.02757921 |
| 2.98E-15   | 0.42752734 | 1.28E-09   | -0.8332501 | 5.65E-49   | -0.4813606 | 4.03E-12   |
| 0.05576641 | -0.3978815 | 2.04E-08   | 0.5024452  | 3.16E-13   | 0.54492777 | 1.07E-15   |
| 8.05E-08   | -0.3997609 | 1.73E-08   | 0.72615434 | 1.35E-31   | 0.27615344 | 0.00014187 |
| 1.07E-30   | -0.5472327 | 7.65E-16   | 0.63702507 | 1.89E-22   | 0.19129964 | 0.00909517 |
| 1.29E-78   | -0.4061196 | 9.72E-09   | 0.8698052  | 4.84E-58   | 0.60181809 | 1.31E-19   |
| 8.91E-57   | -0.5916495 | 7.45E-19   | 0.96588878 | 2.55E-109  | 0.69242412 | 9.63E-28   |
| 4.59E-14   | -0.4192121 | 2.87E-09   | 0.75370334 | 3.40E-35   | 0.40595879 | 9.87E-09   |
| 2.15E-22   | -0.4751599 | 8.26E-12   | 0.85349366 | 1.08E-53   | 0.78399386 | 9.56E-40   |
| 2.55E-76   | -0.5495544 | 5.46E-16   | 0.87243835 | 8.46E-59   | 0.54941286 | 5.57E-16   |
| 1.47E-20   | 0.30274006 | 2.81E-05   | -0.690546  | 1.52E-27   | -0.7162311 | 2.10E-30   |
| 1.82E-23   | 0.48785956 | 1.88E-12   | -0.8524816 | 1.94E-53   | -0.5671195 | 3.90E-17   |
| 3.77E-33   | -0.481801  | 3.83E-12   | 0.8639312  | 2.07E-56   | 0.56622467 | 4.48E-17   |
| 4.69E-37   | -0.2287281 | 0.00173873 | 0.75294758 | 4.33E-35   | 0.40722431 | 8.79E-09   |
| 7.54E-49   | 0.49276372 | 1.04E-12   | -0.9161867 | 1.36E-74   | -0.7489178 | 1.55E-34   |
| 4.09E-18   | -0.3279725 | 5.18E-06   | 0.80189208 | 8.52E-43   | 0.43271741 | 7.68E-10   |
| 2.23E-21   | -0.4091474 | 7.36E-09   | 0.75716264 | 1.11E-35   | 0.75320219 | 3.99E-35   |
| 2.46E-21   | -0.4147474 | 4.37E-09   | 0.63526012 | 2.68E-22   | 0.19299444 | 0.00848819 |



|            |            |            |            |          |            |            |
|------------|------------|------------|------------|----------|------------|------------|
| 0.00159185 | 0.34923895 | 1.10E-06   | -0.4417455 | 3.08E-10 | -0.4780913 | 5.90E-12   |
| 2.54E-38   | -0.6355069 | 2.55E-22   | 0.9537082  | 1.98E-97 | 0.65468817 | 5.13E-24   |
| 2.88E-10   | -0.3862005 | 5.65E-08   | 0.73967344 | 2.64E-33 | 0.59163446 | 7.47E-19   |
| 5.38E-13   | 0.46907722 | 1.64E-11   | -0.7708875 | 1.09E-37 | -0.5679789 | 3.41E-17   |
| 5.69E-34   | 0.53210611 | 6.47E-15   | -0.7255316 | 1.61E-31 | -0.4307342 | 9.36E-10   |
| 6.70E-22   | 0.27639509 | 0.00013989 | -0.6392867 | 1.21E-22 | -0.5080024 | 1.57E-13   |
| 1.94E-12   | 0.34344891 | 1.70E-06   | -0.7667751 | 4.49E-37 | -0.4044123 | 1.14E-08   |
| 1.26E-28   | 0.30281162 | 2.80E-05   | -0.6082462 | 4.21E-20 | -0.1092895 | 0.13864339 |
| 4.55E-07   | 0.54339567 | 1.33E-15   | -0.629913  | 7.59E-22 | -0.0136546 | 0.8536432  |
| 3.46E-15   | 0.58232131 | 3.49E-18   | -0.8095514 | 3.37E-44 | -0.5150419 | 6.35E-14   |
| 5.13E-08   | -0.3421375 | 1.87E-06   | 0.58850901 | 1.26E-18 | 0.01711677 | 0.81711885 |
| 2.18E-08   | -0.2510506 | 0.00056709 | 0.56359408 | 6.71E-17 | 0.07254318 | 0.32644489 |
| 7.29E-15   | -0.3222893 | 7.68E-06   | 0.79423849 | 1.87E-41 | 0.5514337  | 4.15E-16   |
| 5.76E-17   | 0.40389349 | 1.19E-08   | -0.7116978 | 7.08E-30 | -0.6418275 | 7.27E-23   |
| 5.63E-24   | -0.441575  | 3.14E-10   | 0.84421957 | 1.90E-51 | 0.71748529 | 1.50E-30   |
| 3.59E-23   | -0.4254954 | 1.56E-09   | 0.8158006  | 2.17E-45 | 0.44363682 | 2.54E-10   |
| 3.98E-59   | -0.5377472 | 2.95E-15   | 0.92235904 | 1.66E-77 | 0.81768782 | 9.27E-46   |
| 2.80E-22   | 0.48611243 | 2.31E-12   | -0.7003351 | 1.34E-28 | -0.6133835 | 1.67E-20   |
| 6.54E-36   | -0.3948044 | 2.68E-08   | 0.71353944 | 4.34E-30 | 0.2593932  | 0.00036325 |
| 3.99E-33   | 0.43283747 | 7.59E-10   | -0.7142187 | 3.62E-30 | -0.176218  | 0.0164226  |
| 2.87E-07   | 0.38106969 | 8.73E-08   | -0.4596695 | 4.64E-11 | -0.5106751 | 1.12E-13   |
| 4.18E-51   | -0.3871902 | 5.19E-08   | 0.76600929 | 5.83E-37 | 0.33635031 | 2.86E-06   |
| 1.23E-19   | 0.4738553  | 9.58E-12   | -0.5529838 | 3.30E-16 | -0.3883769 | 4.69E-08   |
| 3.47E-40   | -0.4694047 | 1.58E-11   | 0.91722116 | 4.58E-75 | 0.44500747 | 2.20E-10   |
| 2.06E-34   | -0.5314899 | 7.04E-15   | 0.77314219 | 4.92E-38 | 0.4541383  | 8.43E-11   |
| 2.69E-24   | -0.4797863 | 4.85E-12   | 0.8308772  | 1.83E-48 | 0.57384136 | 1.36E-17   |
| 1.09E-27   | 0.46957821 | 1.55E-11   | -0.8755434 | 1.03E-59 | -0.7570734 | 1.14E-35   |
| 1.66E-22   | 0.4692921  | 1.60E-11   | -0.7590019 | 6.09E-36 | -0.746357  | 3.44E-34   |
| 1.50E-29   | 0.19935729 | 0.0065176  | -0.5156274 | 5.88E-14 | -0.1229518 | 0.09545014 |
| 3.37E-13   | -0.4146572 | 4.41E-09   | 0.78747439 | 2.57E-40 | 0.75056475 | 9.23E-35   |
| 6.85E-24   | 0.22913723 | 0.00170495 | -0.5625486 | 7.87E-17 | -0.1905587 | 0.00937239 |
| 6.11E-18   | -0.5068744 | 1.81E-13   | 0.86197752 | 6.95E-56 | 0.76001571 | 4.36E-36   |
| 2.33E-46   | -0.5276317 | 1.19E-14   | 0.95451422 | 4.13E-98 | 0.75977168 | 4.72E-36   |
| 1.48E-18   | -0.3295786 | 4.63E-06   | 0.76697929 | 4.19E-37 | 0.67076455 | 1.55E-25   |
| 1.46E-14   | -0.4978266 | 5.61E-13   | 0.85434256 | 6.64E-54 | 0.59927064 | 2.03E-19   |
| 0.00049558 | -0.4360414 | 5.51E-10   | 0.48773646 | 1.90E-12 | 0.68202015 | 1.17E-26   |
| 9.54E-18   | -0.4193909 | 2.82E-09   | 0.65798361 | 2.55E-24 | 0.21993807 | 0.00262863 |
| 9.12E-18   | -0.4858634 | 2.38E-12   | 0.82936281 | 3.85E-48 | 0.80240949 | 6.88E-43   |
| 4.40E-20   | 0.30488785 | 2.45E-05   | -0.6634337 | 7.84E-25 | -0.1523398 | 0.03844303 |
| 0.00032056 | 0.21327194 | 0.00355961 | -0.4116328 | 5.85E-09 | -0.5449015 | 1.07E-15   |
| 1.22E-25   | 0.46225616 | 3.50E-11   | -0.8544908 | 6.09E-54 | -0.7035236 | 5.97E-29   |
| 6.46E-41   | -0.562278  | 8.20E-17   | 0.91090934 | 2.84E-72 | 0.7516987  | 6.45E-35   |
| 2.90E-15   | -0.4864243 | 2.22E-12   | 0.78261525 | 1.60E-39 | 0.82644808 | 1.57E-47   |
| 7.60E-11   | 0.22473939 | 0.00210144 | -0.6144357 | 1.38E-20 | -0.7356524 | 8.74E-33   |
| 2.54E-18   | -0.4167646 | 3.62E-09   | 0.82482632 | 3.40E-47 | 0.80384238 | 3.80E-43   |
| 3.45E-40   | 0.30303322 | 2.76E-05   | -0.7094736 | 1.27E-29 | -0.5063459 | 1.94E-13   |

|            |            |            |            |          |            |            |
|------------|------------|------------|------------|----------|------------|------------|
| 2.26E-43   | -0.5429656 | 1.41E-15   | 0.88651288 | 3.73E-63 | 0.59529116 | 4.02E-19   |
| 5.36E-22   | 0.30854198 | 1.93E-05   | -0.5347593 | 4.48E-15 | -0.173837  | 0.01795916 |
| 0.00067665 | 0.26520348 | 0.00026403 | -0.4559482 | 6.94E-11 | -0.17872   | 0.01493267 |
| 2.37E-33   | -0.3185159 | 9.94E-06   | 0.66526975 | 5.24E-25 | 0.1984904  | 0.00675951 |
| 1.59E-30   | -0.5744681 | 1.23E-17   | 0.83106571 | 1.67E-48 | 0.74760833 | 2.33E-34   |
| 7.43E-35   | -0.3875495 | 5.04E-08   | 0.61643312 | 9.57E-21 | 0.16613568 | 0.02381482 |
| 6.60E-06   | -0.4188466 | 2.97E-09   | 0.55539427 | 2.31E-16 | 0.09507915 | 0.19796552 |
| 6.68E-17   | -0.2639505 | 0.00028301 | 0.46419705 | 2.83E-11 | 0.36928766 | 2.31E-07   |
| 2.31E-64   | -0.5532187 | 3.19E-16   | 0.90265897 | 6.38E-69 | 0.48646035 | 2.21E-12   |
| 1.98E-29   | -0.6580891 | 2.49E-24   | 0.83148052 | 1.36E-48 | 0.42283966 | 2.02E-09   |
| 6.83E-29   | -0.5244216 | 1.84E-14   | 0.93848274 | 1.97E-86 | 0.62078812 | 4.28E-21   |
| 1.81E-17   | -0.5102388 | 1.18E-13   | 0.87419086 | 2.59E-59 | 0.49136494 | 1.23E-12   |
| 8.90E-36   | -0.4184311 | 3.09E-09   | 0.70760592 | 2.08E-29 | 0.22360031 | 0.00221698 |
| 2.45E-24   | -0.4805034 | 4.46E-12   | 0.79076268 | 7.28E-41 | 0.63357083 | 3.73E-22   |
| 1.13E-27   | 0.43214976 | 8.13E-10   | -0.7352398 | 9.87E-33 | -0.1881444 | 0.01032824 |
| 7.23E-24   | -0.3941941 | 2.83E-08   | 0.82010615 | 3.08E-46 | 0.43782353 | 4.60E-10   |
| 1.28E-17   | -0.5311603 | 7.37E-15   | 0.79050619 | 8.04E-41 | 0.36647152 | 2.89E-07   |
| 9.02E-37   | -0.5038721 | 2.65E-13   | 0.73608582 | 7.69E-33 | 0.18500672 | 0.01169853 |
| 4.04E-32   | 0.36391145 | 3.55E-07   | -0.7049928 | 4.09E-29 | -0.6260364 | 1.59E-21   |
| 7.24E-06   | -0.0092706 | 0.90033193 | 0.5075938  | 1.65E-13 | 0.63200784 | 5.06E-22   |
| 1.73E-06   | -0.4577518 | 5.72E-11   | 0.71093309 | 8.67E-30 | 0.53572971 | 3.92E-15   |
| 1.85E-21   | -0.4893111 | 1.58E-12   | 0.8390678  | 2.91E-50 | 0.81265356 | 8.75E-45   |
| 2.75E-28   | 0.41136759 | 6.00E-09   | -0.7817352 | 2.21E-39 | -0.5805499 | 4.66E-18   |
| 1.58E-27   | -0.2556101 | 0.00044537 | 0.75391921 | 3.17E-35 | 0.57113346 | 2.09E-17   |
| 1.65E-33   | 0.54213346 | 1.59E-15   | -0.8305515 | 2.15E-48 | -0.6616346 | 1.16E-24   |
| 3.29E-14   | 0.44506335 | 2.19E-10   | -0.6243349 | 2.20E-21 | -0.7397537 | 2.58E-33   |
| 2.39E-32   | 0.20085271 | 0.00611838 | -0.6461291 | 3.04E-23 | -0.5193699 | 3.60E-14   |
| 7.06E-15   | -0.595387  | 3.96E-19   | 0.68214716 | 1.13E-26 | 0.31541621 | 1.22E-05   |
| 2.79E-22   | 0.25352072 | 0.00049779 | -0.5964432 | 3.31E-19 | -0.2877535 | 7.14E-05   |
| 2.75E-20   | 0.32430814 | 6.68E-06   | -0.7041503 | 5.08E-29 | -0.1890698 | 0.00995217 |
| 1.11E-14   | 0.50374412 | 2.69E-13   | -0.571188  | 2.07E-17 | -0.150627  | 0.04070186 |
| 1.99E-09   | 0.23334279 | 0.00139088 | -0.4967276 | 6.42E-13 | -0.5614324 | 9.32E-17   |
| 5.35E-37   | -0.5933844 | 5.56E-19   | 0.94226099 | 7.08E-89 | 0.67417129 | 7.16E-26   |
| 2.32E-32   | -0.575317  | 1.08E-17   | 0.91308912 | 3.26E-73 | 0.52603349 | 1.48E-14   |
| 3.29E-27   | 0.56374737 | 6.55E-17   | -0.8383621 | 4.20E-50 | -0.6607618 | 1.40E-24   |
| 1.87E-33   | -0.5300586 | 8.57E-15   | 0.92559864 | 3.90E-79 | 0.76063863 | 3.54E-36   |
| 0.03569838 | 0.31159927 | 1.58E-05   | -0.5524983 | 3.55E-16 | -0.4170744 | 3.51E-09   |
| 4.37E-40   | 0.60515889 | 7.27E-20   | -0.646045  | 3.09E-23 | -0.4758423 | 7.64E-12   |
| 1.22E-06   | -0.285335  | 8.26E-05   | 0.42172013 | 2.25E-09 | 0.02006974 | 0.78627173 |
| 1.34E-41   | -0.412704  | 5.29E-09   | 0.65442926 | 5.42E-24 | 0.22329784 | 0.00224861 |
| 5.59E-30   | 0.46519744 | 2.53E-11   | -0.862982  | 3.74E-56 | -0.4069515 | 9.01E-09   |
| 0.59507215 | 0.3100689  | 1.75E-05   | -0.3945213 | 2.75E-08 | 0.14324718 | 0.05174967 |
| 7.08E-55   | -0.5354114 | 4.09E-15   | 0.93565956 | 1.05E-84 | 0.67045734 | 1.66E-25   |
| 5.91E-53   | -0.4210007 | 2.42E-09   | 0.92891095 | 7.04E-81 | 0.56853151 | 3.13E-17   |
| 3.32E-05   | 0.22881429 | 0.00173156 | -0.5954091 | 3.94E-19 | -0.2938809 | 4.90E-05   |
| 0.78792884 | -0.1960075 | 0.00749731 | 0.3740484  | 1.56E-07 | 0.46654412 | 2.18E-11   |

|            |            |            |            |            |            |            |
|------------|------------|------------|------------|------------|------------|------------|
| 1.43E-07   | -0.3510772 | 9.60E-07   | 0.67361927 | 8.12E-26   | 0.7181709  | 1.24E-30   |
| 1.17E-23   | -0.6354417 | 2.59E-22   | 0.90579689 | 3.69E-70   | 0.71079749 | 8.99E-30   |
| 6.23E-09   | 0.3527944  | 8.42E-07   | -0.7605531 | 3.65E-36   | -0.3359543 | 2.94E-06   |
| 2.81E-34   | -0.2759447 | 0.00014359 | 0.75438212 | 2.73E-35   | 0.71170257 | 7.07E-30   |
| 7.57E-14   | -0.5324823 | 6.14E-15   | 0.85074825 | 5.19E-53   | 0.5599585  | 1.17E-16   |
| 7.90E-13   | -0.557428  | 1.71E-16   | 0.79102431 | 6.58E-41   | 0.32816441 | 5.11E-06   |
| 1.24E-29   | -0.3933861 | 3.04E-08   | 0.72792312 | 8.20E-32   | 0.72719387 | 1.01E-31   |
| 9.61E-37   | 0.29509815 | 4.55E-05   | -0.6112885 | 2.44E-20   | -0.4270899 | 1.34E-09   |
| 5.20E-39   | 0.68241851 | 1.06E-26   | -0.7493499 | 1.35E-34   | -0.5247693 | 1.75E-14   |
| 0.28278783 | 0.26346245 | 0.00029074 | -0.330478  | 4.34E-06   | -0.4694736 | 1.57E-11   |
| 6.95E-38   | -0.4292405 | 1.08E-09   | 0.64390983 | 4.77E-23   | 0.25774804 | 0.00039706 |
| 1.43E-48   | -0.503591  | 2.74E-13   | 0.77216837 | 6.93E-38   | 0.34896932 | 1.13E-06   |
| 2.06E-07   | -0.359608  | 4.98E-07   | 0.73008301 | 4.42E-32   | 0.49792715 | 5.54E-13   |
| 2.46E-40   | -0.4220939 | 2.17E-09   | 0.8181835  | 7.40E-46   | 0.38887415 | 4.49E-08   |
| 1.33E-18   | -0.362453  | 3.98E-07   | 0.79550358 | 1.13E-41   | 0.50357732 | 2.75E-13   |
| 3.03E-50   | -0.5031249 | 2.91E-13   | 0.83397725 | 3.92E-49   | 0.46798421 | 1.86E-11   |
| 1.42E-37   | -0.2259868 | 0.00198122 | 0.65135148 | 1.03E-23   | 0.37018659 | 2.14E-07   |
| 2.00E-33   | -0.6114076 | 2.39E-20   | 0.91524218 | 3.63E-74   | 0.58896379 | 1.17E-18   |
| 5.72E-07   | -0.3461879 | 1.39E-06   | 0.59673684 | 3.14E-19   | 0.80747526 | 8.21E-44   |
| 4.91E-18   | 0.60633033 | 5.91E-20   | -0.6914273 | 1.23E-27   | -0.2828765 | 9.56E-05   |
| 6.26E-27   | -0.4572662 | 6.03E-11   | 0.8713552  | 1.74E-58   | 0.40641522 | 9.46E-09   |
| 5.56E-15   | -0.4492168 | 1.42E-10   | 0.78760736 | 2.45E-40   | 0.36204467 | 4.11E-07   |
| 6.77E-26   | -0.3897614 | 4.16E-08   | 0.56748133 | 3.69E-17   | 0.11653264 | 0.11418498 |
| 2.94E-14   | -0.451483  | 1.12E-10   | 0.75086324 | 8.40E-35   | 0.40093266 | 1.56E-08   |
| 1.44E-44   | -0.3165812 | 1.13E-05   | 0.69929214 | 1.75E-28   | 0.21547354 | 0.00322357 |
| 3.86E-05   | -0.386544  | 5.49E-08   | 0.61541292 | 1.15E-20   | 0.6355418  | 2.54E-22   |
| 5.18E-31   | 0.44533074 | 2.13E-10   | -0.8200433 | 3.17E-46   | -0.6217947 | 3.54E-21   |
| 1.29E-13   | 0.58885366 | 1.19E-18   | -0.5817624 | 3.82E-18   | -0.2858041 | 8.03E-05   |
| 5.80E-21   | -0.4888432 | 1.67E-12   | 0.82923761 | 4.09E-48   | 0.73683765 | 6.16E-33   |
| 9.33E-42   | -0.2297269 | 0.00165733 | 0.76085082 | 3.30E-36   | 0.36172265 | 4.22E-07   |
| 1.08E-18   | -0.4920352 | 1.14E-12   | 0.83047676 | 2.23E-48   | 0.43491737 | 6.17E-10   |
| 1.77E-22   | -0.220941  | 0.00250951 | 0.52824655 | 1.10E-14   | 0.02882328 | 0.69693382 |
| 2.97E-29   | 0.30194566 | 2.95E-05   | -0.7225815 | 3.69E-31   | -0.4082079 | 8.03E-09   |
| 5.88E-28   | -0.5530197 | 3.28E-16   | 0.9160914  | 1.50E-74   | 0.7144048  | 3.44E-30   |
| 1.05E-09   | 0.29471422 | 4.66E-05   | -0.5814054 | 4.05E-18   | -0.4209399 | 2.43E-09   |
| 0.02412211 | 0.27999948 | 0.00011334 | -0.1175039 | 0.11117891 | -0.1489032 | 0.04308687 |
| 5.42E-20   | -0.0191255 | 0.79610225 | 0.59422305 | 4.83E-19   | 0.65307712 | 7.20E-24   |
| 4.09E-20   | 0.54937543 | 5.60E-16   | -0.5548298 | 2.51E-16   | -0.1880542 | 0.01036558 |
| 1.49E-07   | -0.4229679 | 2.00E-09   | 0.68570817 | 4.87E-27   | 0.66065409 | 1.43E-24   |
| 8.68E-24   | -0.4852855 | 2.55E-12   | 0.75974744 | 4.76E-36   | 0.58101629 | 4.32E-18   |
| 1.22E-47   | -0.4700474 | 1.47E-11   | 0.88599781 | 5.52E-63   | 0.70960904 | 1.23E-29   |
| 1.49E-29   | 0.31896996 | 9.64E-06   | -0.6330781 | 4.11E-22   | -0.3407357 | 2.08E-06   |
| 5.83E-18   | 0.53605063 | 3.74E-15   | -0.7062317 | 2.97E-29   | -0.3737922 | 1.60E-07   |
| 4.21E-35   | -0.4041495 | 1.16E-08   | 0.60488387 | 7.64E-20   | 0.30457678 | 2.50E-05   |
| 3.90E-07   | 0.46445426 | 2.75E-11   | -0.482918  | 3.36E-12   | -0.4549608 | 7.72E-11   |
| 1.43E-31   | -0.353307  | 8.10E-07   | 0.77358139 | 4.21E-38   | 0.26542509 | 0.0002608  |

|            |            |            |            |          |            |            |
|------------|------------|------------|------------|----------|------------|------------|
| 1.27E-32   | -0.4093354 | 7.24E-09   | 0.58903126 | 1.16E-18 | 0.19676822 | 0.00726398 |
| 5.59E-20   | 0.27190606 | 0.00018108 | -0.6109171 | 2.61E-20 | -0.5453684 | 1.00E-15   |
| 2.07E-40   | 0.45285945 | 9.66E-11   | -0.762933  | 1.65E-36 | -0.5229642 | 2.23E-14   |
| 1.37E-12   | 0.42619445 | 1.46E-09   | -0.61775   | 7.51E-21 | -0.668215  | 2.73E-25   |
| 1.17E-09   | 0.30435281 | 2.53E-05   | -0.5811145 | 4.25E-18 | -0.5246954 | 1.77E-14   |
| 4.12E-37   | 0.48730034 | 2.00E-12   | -0.8408777 | 1.13E-50 | -0.5787269 | 6.25E-18   |
| 6.36E-27   | 0.83501401 | 2.33E-49   | -0.7631106 | 1.55E-36 | -0.4768063 | 6.84E-12   |
| 3.22E-20   | 0.21287521 | 0.00362342 | -0.5754834 | 1.05E-17 | -0.6413815 | 7.95E-23   |
| 5.17E-15   | 0.33045888 | 4.35E-06   | -0.5624076 | 8.04E-17 | -0.5388828 | 2.52E-15   |
| 5.75E-29   | 0.45282592 | 9.69E-11   | -0.8489835 | 1.40E-52 | -0.7155339 | 2.54E-30   |
| 2.87E-22   | 0.55058031 | 4.70E-16   | -0.6929561 | 8.45E-28 | -0.8062422 | 1.39E-43   |
| 7.48E-21   | -0.6054802 | 6.87E-20   | 0.6149514  | 1.26E-20 | 0.41639773 | 3.74E-09   |
| 2.46E-15   | -0.5185031 | 4.04E-14   | 0.81474498 | 3.47E-45 | 0.62130794 | 3.88E-21   |
| 6.96E-43   | 0.48436575 | 2.84E-12   | -0.8303345 | 2.39E-48 | -0.6497029 | 1.45E-23   |
| 4.36E-29   | -0.3956139 | 2.50E-08   | 0.73106908 | 3.33E-32 | 0.22133687 | 0.00246385 |
| 2.34E-49   | 0.61648536 | 9.48E-21   | -0.8318733 | 1.12E-48 | -0.579888  | 5.18E-18   |
| 4.52E-10   | 0.35361356 | 7.91E-07   | -0.5557419 | 2.19E-16 | -0.7452131 | 4.90E-34   |
| 3.65E-20   | -0.3421921 | 1.87E-06   | 0.74703902 | 2.79E-34 | 0.26317687 | 0.00029535 |
| 1.34E-37   | -0.2197435 | 0.00265233 | 0.78668111 | 3.48E-40 | 0.3396437  | 2.25E-06   |
| 1.40E-25   | -0.3168406 | 1.11E-05   | 0.52810917 | 1.12E-14 | 0.04612493 | 0.53299109 |
| 7.49E-34   | 0.59365018 | 5.32E-19   | -0.8117608 | 1.29E-44 | -0.471529  | 1.25E-11   |
| 2.53E-12   | -0.4481147 | 1.59E-10   | 0.78941373 | 1.23E-40 | 0.31231204 | 1.51E-05   |
| 9.77E-35   | -0.6314652 | 5.62E-22   | 0.95607466 | 1.82E-99 | 0.65421217 | 5.67E-24   |
| 0.03798945 | -0.2853029 | 8.27E-05   | 0.48366239 | 3.08E-12 | 0.52234166 | 2.43E-14   |
| 5.60E-27   | -0.5186325 | 3.97E-14   | 0.89999633 | 6.65E-68 | 0.61466609 | 1.32E-20   |
| 3.19E-22   | -0.462274  | 3.49E-11   | 0.81325732 | 6.71E-45 | 0.79788727 | 4.36E-42   |
| 5.11E-23   | -0.324233  | 6.72E-06   | 0.7490832  | 1.47E-34 | 0.17510059 | 0.01712883 |
| 8.93E-29   | -0.3374319 | 2.64E-06   | 0.77338369 | 4.52E-38 | 0.55238354 | 3.61E-16   |
| 9.09E-27   | 0.56746173 | 3.70E-17   | -0.5549912 | 2.45E-16 | -0.2064913 | 0.00480227 |
| 6.20E-43   | -0.3984122 | 1.95E-08   | 0.71931427 | 9.08E-31 | 0.33609884 | 2.91E-06   |
| 9.80E-31   | 0.27832665 | 0.00012502 | -0.5245112 | 1.82E-14 | -0.3997523 | 1.73E-08   |
| 3.87E-05   | -0.3897591 | 4.16E-08   | 0.65968608 | 1.77E-24 | 0.5258902  | 1.51E-14   |
| 2.51E-50   | 0.65586049 | 4.00E-24   | -0.8089941 | 4.29E-44 | -0.5490478 | 5.88E-16   |
| 3.16E-14   | -0.315213  | 1.24E-05   | 0.74858988 | 1.72E-34 | 0.41280689 | 5.24E-09   |
| 1.01E-30   | -0.5356208 | 3.98E-15   | 0.80419105 | 3.28E-43 | 0.56353802 | 6.77E-17   |
| 1.35E-18   | 0.5190924  | 3.74E-14   | -0.6804556 | 1.68E-26 | -0.7194723 | 8.70E-31   |
| 2.89E-55   | -0.5452366 | 1.02E-15   | 0.92247436 | 1.45E-77 | 0.71574144 | 2.40E-30   |
| 1.40E-11   | 0.37459337 | 1.50E-07   | -0.5454376 | 9.91E-16 | -0.326664  | 5.68E-06   |
| 4.45E-09   | -0.4408994 | 3.36E-10   | 0.76640329 | 5.10E-37 | 0.65059913 | 1.21E-23   |
| 4.08E-25   | -0.4409211 | 3.36E-10   | 0.81917272 | 4.72E-46 | 0.76073406 | 3.43E-36   |
| 3.55E-31   | -0.5549174 | 2.48E-16   | 0.88222538 | 9.07E-62 | 0.64845877 | 1.88E-23   |
| 7.85E-42   | -0.5618988 | 8.69E-17   | 0.92435271 | 1.68E-78 | 0.69485142 | 5.30E-28   |
| 4.97E-39   | -0.5676594 | 3.59E-17   | 0.68773052 | 3.00E-27 | 0.31915762 | 9.51E-06   |
| 6.48E-17   | -0.4320628 | 8.20E-10   | 0.8269327  | 1.25E-47 | 0.46209628 | 3.56E-11   |
| 8.79E-39   | -0.4116604 | 5.83E-09   | 0.74466032 | 5.81E-34 | 0.23458334 | 0.0013089  |
| 4.77E-22   | 0.43348591 | 7.12E-10   | -0.8631727 | 3.32E-56 | -0.5489216 | 5.99E-16   |

|            |            |            |            |          |            |            |
|------------|------------|------------|------------|----------|------------|------------|
| 1.31E-20   | 0.50547357 | 2.16E-13   | -0.8023239 | 7.13E-43 | -0.5746272 | 1.20E-17   |
| 8.29E-28   | 0.46049381 | 4.25E-11   | -0.870887  | 2.37E-58 | -0.6793648 | 2.17E-26   |
| 1.71E-44   | -0.5602589 | 1.11E-16   | 0.85218872 | 2.29E-53 | 0.41350973 | 4.91E-09   |
| 1.11E-33   | -0.5019302 | 3.37E-13   | 0.91745246 | 3.59E-75 | 0.5765201  | 8.90E-18   |
| 2.62E-19   | 0.41375628 | 4.80E-09   | -0.7745532 | 2.98E-38 | -0.3752151 | 1.42E-07   |
| 2.38E-25   | -0.2064817 | 0.00480429 | 0.5804333  | 4.74E-18 | 0.14985291 | 0.04175882 |
| 3.22E-36   | 0.3881925  | 4.77E-08   | -0.755861  | 1.70E-35 | -0.2933095 | 5.08E-05   |
| 4.33E-25   | 0.51932435 | 3.62E-14   | -0.6016797 | 1.34E-19 | -0.1841067 | 0.01212003 |
| 4.91E-21   | 0.67876071 | 2.49E-26   | -0.8153043 | 2.71E-45 | -0.6790037 | 2.36E-26   |
| 1.84E-20   | -0.315836  | 1.19E-05   | 0.70708224 | 2.38E-29 | 0.19805282 | 0.00688464 |
| 8.78E-17   | 0.35972932 | 4.93E-07   | -0.6480987 | 2.03E-23 | -0.7486548 | 1.68E-34   |
| 0.00054794 | -0.5235872 | 2.06E-14   | 0.55565974 | 2.22E-16 | 0.23420062 | 0.00133371 |
| 0.07717802 | -0.3779029 | 1.14E-07   | 0.54108715 | 1.84E-15 | 0.45010664 | 1.29E-10   |
| 1.43E-29   | -0.5059396 | 2.04E-13   | 0.8742246  | 2.53E-59 | 0.52459211 | 1.80E-14   |
| 1.32E-09   | 0.25806497 | 0.00039033 | -0.5438494 | 1.24E-15 | -0.6126954 | 1.89E-20   |
| 9.97E-38   | 0.3944027  | 2.78E-08   | -0.7752213 | 2.35E-38 | -0.397439  | 2.12E-08   |
| 4.16E-18   | -0.510237  | 1.18E-13   | 0.86723616 | 2.56E-57 | 0.7496168  | 1.24E-34   |
| 3.11E-28   | -0.560328  | 1.10E-16   | 0.91595067 | 1.74E-74 | 0.77543103 | 2.18E-38   |
| 4.31E-10   | -0.4385943 | 4.25E-10   | 0.73285462 | 1.98E-32 | 0.6534093  | 6.71E-24   |
| 2.60E-47   | -0.3932939 | 3.06E-08   | 0.87385732 | 3.25E-59 | 0.82210526 | 1.22E-46   |
| 1.30E-26   | -0.4991506 | 4.77E-13   | 0.88450565 | 1.69E-62 | 0.6769193  | 3.82E-26   |
| 1.17E-36   | -0.4545653 | 8.05E-11   | 0.6911221  | 1.32E-27 | 0.3121226  | 1.52E-05   |
| 6.94E-28   | 0.65225918 | 8.54E-24   | -0.5943723 | 4.70E-19 | -0.3528052 | 8.42E-07   |
| 4.48E-08   | -0.3571496 | 6.03E-07   | 0.67414819 | 7.20E-26 | 0.42513256 | 1.62E-09   |
| 7.97E-06   | 0.28133701 | 0.00010475 | -0.6329684 | 4.20E-22 | -0.4524944 | 1.00E-10   |
| 8.09E-10   | 0.3573291  | 5.94E-07   | -0.6754097 | 5.40E-26 | -0.6688913 | 2.35E-25   |
| 3.33E-11   | -0.4290658 | 1.10E-09   | 0.39528875 | 2.57E-08 | 0.09219069 | 0.21199819 |
| 2.71E-08   | 0.54060127 | 1.98E-15   | -0.5850806 | 2.22E-18 | -0.6941778 | 6.26E-28   |
| 1.74E-09   | -0.5796616 | 5.37E-18   | 0.72021186 | 7.10E-31 | 0.60179965 | 1.31E-19   |
| 7.75E-25   | -0.5228331 | 2.27E-14   | 0.91207536 | 8.98E-73 | 0.73920697 | 3.04E-33   |
| 2.57E-29   | 0.38627927 | 5.62E-08   | -0.8612924 | 1.06E-55 | -0.5365792 | 3.48E-15   |
| 2.68E-07   | -0.2867979 | 7.56E-05   | 0.66218114 | 1.03E-24 | 0.64509389 | 3.75E-23   |
| 2.52E-11   | -0.4271155 | 1.34E-09   | 0.59255041 | 6.40E-19 | 0.874566   | 2.01E-59   |
| 2.01E-16   | -0.4458947 | 2.01E-10   | 0.83992835 | 1.86E-50 | 0.70247009 | 7.82E-29   |
| 5.62E-31   | 0.46582502 | 2.36E-11   | -0.8536979 | 9.64E-54 | -0.5030125 | 2.95E-13   |
| 4.52E-21   | 0.35563569 | 6.77E-07   | -0.7442878 | 6.51E-34 | -0.6309648 | 6.19E-22   |
| 0.00276379 | -0.2530338 | 0.0005108  | 0.60613651 | 6.12E-20 | 0.50737736 | 1.70E-13   |
| 3.28E-11   | 0.73497075 | 1.07E-32   | -0.6696214 | 2.00E-25 | -0.39237   | 3.32E-08   |
| 1.20E-09   | 0.50534412 | 2.20E-13   | -0.7145829 | 3.28E-30 | -0.086389  | 0.24230694 |
| 1.33E-31   | -0.452588  | 9.94E-11   | 0.91383919 | 1.53E-73 | 0.73215371 | 2.43E-32   |
| 4.86E-17   | 0.51532289 | 6.12E-14   | -0.8323844 | 8.70E-49 | -0.5088167 | 1.42E-13   |
| 2.58E-35   | 0.64209848 | 6.88E-23   | -0.8242647 | 4.44E-47 | -0.3313325 | 4.09E-06   |
| 7.63E-24   | -0.2651473 | 0.00026485 | 0.4138787  | 4.74E-09 | 0.18957374 | 0.00975247 |
| 2.10E-11   | 0.36114083 | 4.41E-07   | -0.7043725 | 4.80E-29 | -0.5637079 | 6.59E-17   |
| 9.26E-19   | 0.48429501 | 2.86E-12   | -0.7667457 | 4.54E-37 | -0.3098389 | 1.77E-05   |
| 6.73E-31   | -0.45281   | 9.71E-11   | 0.89153574 | 7.53E-65 | 0.5982349  | 2.43E-19   |

|            |            |            |            |          |            |            |
|------------|------------|------------|------------|----------|------------|------------|
| 1.53E-11   | 0.32355943 | 7.04E-06   | -0.6431053 | 5.62E-23 | -0.3918034 | 3.49E-08   |
| 1.39E-32   | 0.52030636 | 3.18E-14   | -0.5592128 | 1.30E-16 | -0.5674215 | 3.72E-17   |
| 9.79E-09   | 0.38009977 | 9.47E-08   | -0.7822809 | 1.81E-39 | -0.3802084 | 9.39E-08   |
| 1.17E-13   | 0.38646911 | 5.53E-08   | -0.6335223 | 3.77E-22 | -0.5745083 | 1.23E-17   |
| 6.54E-32   | -0.5983475 | 2.38E-19   | 0.94611837 | 1.51E-91 | 0.608331   | 4.15E-20   |
| 1.40E-17   | 0.41866578 | 3.02E-09   | -0.7806669 | 3.28E-39 | -0.6163157 | 9.78E-21   |
| 3.48E-17   | 0.32478958 | 6.47E-06   | -0.4604728 | 4.26E-11 | 0.07580594 | 0.3050989  |
| 5.01E-13   | 0.44053014 | 3.49E-10   | -0.6734205 | 8.49E-26 | -0.2965446 | 4.16E-05   |
| 2.75E-20   | -0.3505227 | 1.00E-06   | 0.53834754 | 2.72E-15 | 0.07466402 | 0.31246273 |
| 9.83E-13   | -0.2220642 | 0.00238193 | 0.59078823 | 8.61E-19 | 0.22839747 | 0.00176647 |
| 1.40E-11   | -0.4357608 | 5.67E-10   | 0.6969987  | 3.11E-28 | 0.5399092  | 2.18E-15   |
| 4.56E-29   | -0.3860261 | 5.74E-08   | 0.6656351  | 4.84E-25 | 0.6470733  | 2.50E-23   |
| 6.54E-10   | -0.0577419 | 0.43497669 | 0.50984486 | 1.24E-13 | 0.03354132 | 0.6503711  |
| 1.39E-10   | -0.4614175 | 3.84E-11   | 0.56569688 | 4.86E-17 | 0.64890205 | 1.72E-23   |
| 6.94E-22   | -0.3473844 | 1.27E-06   | 0.77230616 | 6.60E-38 | 0.36813207 | 2.53E-07   |
| 3.03E-27   | -0.5029575 | 2.97E-13   | 0.84197995 | 6.30E-51 | 0.51574143 | 5.80E-14   |
| 5.45E-06   | -0.4546597 | 7.97E-11   | 0.52184637 | 2.59E-14 | 0.72751195 | 9.22E-32   |
| 2.29E-27   | 0.39653378 | 2.30E-08   | -0.7158108 | 2.36E-30 | -0.6814263 | 1.34E-26   |
| 6.33E-09   | 0.33940912 | 2.29E-06   | -0.5811705 | 4.21E-18 | -0.6271997 | 1.28E-21   |
| 6.12E-28   | 0.07105602 | 0.33648613 | -0.644529  | 4.21E-23 | -0.328782  | 4.89E-06   |
| 3.14E-24   | 0.58863468 | 1.23E-18   | -0.803795  | 3.87E-43 | -0.2687444 | 0.0002166  |
| 2.19E-13   | -0.3743275 | 1.53E-07   | 0.64349089 | 5.19E-23 | 0.79355302 | 2.45E-41   |
| 0.00128336 | -0.325135  | 6.31E-06   | 0.63904252 | 1.27E-22 | 0.3267131  | 5.66E-06   |
| 6.50E-43   | -0.4228291 | 2.03E-09   | 0.64374537 | 4.93E-23 | 0.24747334 | 0.00068336 |
| 6.88E-45   | -0.4828243 | 3.40E-12   | 0.87473422 | 1.79E-59 | 0.44191733 | 3.03E-10   |
| 9.56E-24   | -0.4601117 | 4.43E-11   | 0.86189943 | 7.29E-56 | 0.64521619 | 3.66E-23   |
| 1.11E-29   | 0.18204188 | 0.01313775 | -0.5201115 | 3.26E-14 | -0.3157668 | 1.20E-05   |
| 9.73E-31   | -0.564597  | 5.75E-17   | 0.81076022 | 2.00E-44 | 0.49602364 | 7.00E-13   |
| 1.54E-69   | -0.5220495 | 2.52E-14   | 0.86308525 | 3.51E-56 | 0.49556012 | 7.41E-13   |
| 7.85E-25   | 0.39978522 | 1.72E-08   | -0.7204333 | 6.68E-31 | -0.3105809 | 1.69E-05   |
| 2.75E-32   | -0.4191393 | 2.89E-09   | 0.5561944  | 2.05E-16 | 0.28750261 | 7.25E-05   |
| 9.43E-43   | 0.51039584 | 1.16E-13   | -0.7639579 | 1.17E-36 | -0.343213  | 1.73E-06   |
| 7.85E-16   | 0.5730632  | 1.54E-17   | -0.694665  | 5.55E-28 | -0.326666  | 5.68E-06   |
| 2.30E-10   | -0.3725129 | 1.77E-07   | 0.55704108 | 1.81E-16 | 0.3345879  | 3.24E-06   |
| 1.68E-22   | 0.34290465 | 1.77E-06   | -0.7114866 | 7.49E-30 | -0.7372573 | 5.43E-33   |
| 8.20E-38   | 0.46621169 | 2.26E-11   | -0.9082003 | 3.88E-71 | -0.5870585 | 1.60E-18   |
| 3.50E-26   | -0.4734249 | 1.01E-11   | 0.88763089 | 1.59E-63 | 0.67152528 | 1.30E-25   |
| 2.01E-44   | 0.28718282 | 7.39E-05   | -0.6813622 | 1.36E-26 | -0.4756067 | 7.85E-12   |
| 3.81E-34   | -0.4903209 | 1.40E-12   | 0.67189023 | 1.20E-25 | 0.4268168  | 1.38E-09   |
| 3.05E-12   | 0.40978084 | 6.95E-09   | -0.5883948 | 1.28E-18 | -0.4796775 | 4.91E-12   |
| 1.06E-28   | 0.24727996 | 0.00069023 | -0.651241  | 1.06E-23 | -0.392793  | 3.20E-08   |
| 5.28E-29   | -0.54058   | 1.98E-15   | 0.67911291 | 2.30E-26 | 0.2684247  | 0.00022053 |
| 5.62E-33   | 0.2737586  | 0.00016288 | -0.7598907 | 4.54E-36 | -0.4290739 | 1.10E-09   |
| 1.08E-27   | 0.25903991 | 0.00037027 | -0.6261953 | 1.55E-21 | -0.6679782 | 2.88E-25   |
| 2.46E-05   | -0.3845723 | 6.50E-08   | 0.46020764 | 4.38E-11 | 0.78412317 | 9.11E-40   |
| 1.25E-10   | -0.5473395 | 7.53E-16   | 0.75201553 | 5.83E-35 | 0.69494918 | 5.17E-28   |

|            |            |            |            |            |            |            |
|------------|------------|------------|------------|------------|------------|------------|
| 9.16E-26   | 0.49191032 | 1.15E-12   | -0.7726064 | 5.94E-38   | -0.7001951 | 1.39E-28   |
| 1.66E-10   | 0.21107068 | 0.00392688 | -0.544303  | 1.17E-15   | -0.3982861 | 1.97E-08   |
| 2.50E-69   | -0.5507518 | 4.58E-16   | 0.8848263  | 1.33E-62   | 0.591242   | 7.98E-19   |
| 7.45E-32   | 0.43837861 | 4.35E-10   | -0.8415214 | 8.04E-51   | -0.7700015 | 1.48E-37   |
| 1.92E-15   | 0.05023076 | 0.49713137 | -0.4050566 | 1.07E-08   | -0.3864607 | 5.53E-08   |
| 4.41E-61   | 0.68959187 | 1.92E-27   | -0.7946706 | 1.58E-41   | -0.5917691 | 7.31E-19   |
| 1.68E-19   | -0.4413662 | 3.21E-10   | 0.80665387 | 1.16E-43   | 0.8044208  | 2.98E-43   |
| 1.78E-06   | 0.25057451 | 0.00058144 | -0.4816684 | 3.89E-12   | -0.4465262 | 1.88E-10   |
| 3.50E-11   | -0.4918869 | 1.16E-12   | 0.71072993 | 9.15E-30   | 0.27242522 | 0.0001758  |
| 0.40464737 | 0.06503214 | 0.37914708 | -0.2798414 | 0.0001144  | -0.4066524 | 9.26E-09   |
| 4.17E-51   | -0.5305086 | 8.05E-15   | 0.91495241 | 4.90E-74   | 0.51203617 | 9.37E-14   |
| 3.83E-43   | -0.5371794 | 3.20E-15   | 0.8355437  | 1.78E-49   | 0.49348005 | 9.54E-13   |
| 3.79E-17   | 0.31708948 | 1.09E-05   | -0.5815632 | 3.95E-18   | -0.694713  | 5.48E-28   |
| 0.00617145 | 0.65021844 | 1.31E-23   | -0.4174081 | 3.40E-09   | -0.1810316 | 0.01366246 |
| 1.20E-45   | -0.5466542 | 8.31E-16   | 0.86993222 | 4.45E-58   | 0.53099378 | 7.54E-15   |
| 0.00030108 | 0.08147708 | 0.27023092 | -0.409532  | 7.11E-09   | -0.4544894 | 8.12E-11   |
| 4.38E-28   | -0.407187  | 8.82E-09   | 0.71381818 | 4.03E-30   | 0.31010719 | 1.74E-05   |
| 0.00011475 | 0.77118525 | 9.78E-38   | -0.4848096 | 2.69E-12   | -0.3098079 | 1.78E-05   |
| 1.86E-13   | 0.71333072 | 4.59E-30   | -0.6147617 | 1.30E-20   | -0.3168558 | 1.11E-05   |
| 1.47E-21   | 0.25211605 | 0.00053617 | -0.5093628 | 1.32E-13   | -0.5523589 | 3.62E-16   |
| 2.37E-26   | 0.38599335 | 5.75E-08   | -0.747812  | 2.19E-34   | -0.3654603 | 3.13E-07   |
| 0.00092452 | -0.1422702 | 0.05338344 | 0.12669367 | 0.08571053 | 0.09129254 | 0.21650349 |
| 5.81E-15   | 0.33300978 | 3.63E-06   | -0.7382661 | 4.03E-33   | -0.363802  | 3.58E-07   |
| 6.68E-05   | -0.5200795 | 3.28E-14   | 0.66794619 | 2.90E-25   | 0.54847391 | 6.39E-16   |
| 1.39E-11   | 0.29653838 | 4.16E-05   | -0.6943734 | 5.96E-28   | -0.4809319 | 4.24E-12   |
| 4.91E-33   | 0.69767035 | 2.63E-28   | -0.7338036 | 1.50E-32   | -0.4656522 | 2.41E-11   |
| 9.21E-16   | -0.2137133 | 0.0034898  | 0.45067918 | 1.22E-10   | 0.4833764  | 3.19E-12   |
| 4.86E-22   | -0.4800024 | 4.73E-12   | 0.87650556 | 5.30E-60   | 0.74284487 | 1.01E-33   |
| 3.02E-07   | 0.71661231 | 1.90E-30   | -0.6737873 | 7.81E-26   | -0.5182358 | 4.18E-14   |
| 0.08238801 | -0.3857322 | 5.88E-08   | 0.55345444 | 3.08E-16   | 0.38554061 | 5.98E-08   |
| 9.64E-23   | -0.3548141 | 7.22E-07   | 0.44345106 | 2.59E-10   | -0.0259602 | 0.72576594 |
| 9.00E-07   | -0.4990907 | 4.80E-13   | 0.61904424 | 5.91E-21   | 0.77958193 | 4.87E-39   |
| 7.97E-18   | -0.4682699 | 1.80E-11   | 0.75605526 | 1.59E-35   | 0.31217604 | 1.52E-05   |
| 1.09E-05   | -0.3200831 | 8.93E-06   | 0.58589746 | 1.94E-18   | 0.75662633 | 1.32E-35   |
| 0.05763651 | -0.3625433 | 3.95E-07   | 0.23116412 | 0.00154629 | 0.24749822 | 0.00068248 |
| 2.92E-41   | -0.5685403 | 3.13E-17   | 0.89701527 | 8.49E-67   | 0.50185741 | 3.41E-13   |
| 4.09E-23   | 0.38760482 | 5.01E-08   | -0.8447034 | 1.47E-51   | -0.3878493 | 4.91E-08   |
| 2.90E-31   | 0.30847836 | 1.94E-05   | -0.6030519 | 1.05E-19   | -0.2761845 | 0.00014161 |
| 2.22E-26   | -0.4768323 | 6.82E-12   | 0.73230199 | 2.33E-32   | 0.29116594 | 5.80E-05   |
| 2.08E-05   | 0.39255453 | 3.27E-08   | -0.4546223 | 8.00E-11   | 0.00122679 | 0.98677717 |
| 0.00472673 | -0.3027782 | 2.80E-05   | 0.49842535 | 5.21E-13   | 0.68527379 | 5.41E-27   |
| 5.02E-31   | 0.36176294 | 4.20E-07   | -0.74974   | 1.20E-34   | -0.5084311 | 1.49E-13   |
| 1.70E-12   | 0.57324985 | 1.50E-17   | -0.5548056 | 2.52E-16   | -0.3545934 | 7.34E-07   |
| 1.65E-23   | -0.5254014 | 1.61E-14   | 0.81864698 | 6.00E-46   | 0.54552041 | 9.79E-16   |
| 5.95E-14   | 0.36938554 | 2.29E-07   | -0.7180891 | 1.27E-30   | -0.4332702 | 7.27E-10   |
| 4.76E-65   | -0.5289941 | 9.91E-15   | 0.95748355 | 9.82E-101  | 0.6758391  | 4.89E-26   |

|            |            |            |            |          |            |            |
|------------|------------|------------|------------|----------|------------|------------|
| 0.00109675 | 0.26769153 | 0.0002298  | -0.6036573 | 9.47E-20 | -0.3508407 | 9.77E-07   |
| 1.79E-05   | -0.3719503 | 1.86E-07   | 0.52485133 | 1.74E-14 | 0.39564772 | 2.49E-08   |
| 5.84E-41   | 0.63588574 | 2.37E-22   | -0.9404087 | 1.17E-87 | -0.7001758 | 1.40E-28   |
| 0.0243295  | 0.26232471 | 0.00030952 | -0.3212303 | 8.26E-06 | -0.2445547 | 0.00079409 |
| 4.32E-13   | -0.5275727 | 1.20E-14   | 0.68696266 | 3.61E-27 | 0.42542494 | 1.58E-09   |
| 1.41E-25   | -0.3141538 | 1.33E-05   | 0.64204596 | 6.95E-23 | 0.49660528 | 6.52E-13   |
| 1.56E-56   | -0.4691557 | 1.63E-11   | 0.79636203 | 8.04E-42 | 0.36942311 | 2.28E-07   |
| 0.00926417 | 0.3572877  | 5.96E-07   | -0.5851217 | 2.21E-18 | -0.1715286 | 0.01956652 |
| 1.83E-14   | -0.373273  | 1.67E-07   | 0.80107407 | 1.19E-42 | 0.58114317 | 4.23E-18   |
| 1.80E-18   | 0.76904312 | 2.06E-37   | -0.6259022 | 1.63E-21 | -0.4234281 | 1.91E-09   |
| 4.46E-08   | -0.4391412 | 4.02E-10   | 0.68438707 | 6.67E-27 | 0.56328015 | 7.04E-17   |
| 2.86E-21   | 0.51474649 | 6.60E-14   | -0.6855584 | 5.05E-27 | -0.6777411 | 3.16E-26   |
| 2.32E-29   | -0.3029058 | 2.78E-05   | 0.53195703 | 6.60E-15 | 0.04446169 | 0.54787813 |
| 1.07E-27   | 0.27193524 | 0.00018078 | -0.5411722 | 1.82E-15 | -0.1375029 | 0.06197979 |
| 0.05402257 | -0.2287752 | 0.00173481 | 0.36984994 | 2.20E-07 | 0.65638738 | 3.58E-24   |
| 3.07E-24   | -0.5140276 | 7.24E-14   | 0.81019075 | 2.56E-44 | 0.80958464 | 3.33E-44   |
| 2.28E-24   | -0.4522521 | 1.03E-10   | 0.81975151 | 3.62E-46 | 0.28067786 | 0.00010891 |
| 2.44E-07   | 0.29509582 | 4.55E-05   | -0.6991279 | 1.82E-28 | -0.4366486 | 5.18E-10   |
| 1.68E-10   | -0.4450448 | 2.19E-10   | 0.79354155 | 2.46E-41 | 0.43692497 | 5.04E-10   |
| 1.59E-46   | -0.5740744 | 1.31E-17   | 0.88634716 | 4.24E-63 | 0.76803406 | 2.92E-37   |
| 4.70E-39   | 0.26760093 | 0.00023097 | -0.6702247 | 1.75E-25 | -0.4656831 | 2.40E-11   |
| 5.85E-14   | -0.4506434 | 1.22E-10   | 0.62611829 | 1.57E-21 | 0.38344785 | 7.15E-08   |
| 1.84E-27   | -0.4765781 | 7.02E-12   | 0.75867313 | 6.78E-36 | 0.40370886 | 1.21E-08   |
| 3.85E-21   | -0.3855954 | 5.95E-08   | 0.81748016 | 1.02E-45 | 0.68957952 | 1.92E-27   |
| 9.53E-20   | -0.4448583 | 2.24E-10   | 0.73382314 | 1.49E-32 | 0.19224324 | 0.00875265 |
| 1.53E-25   | 0.45251633 | 1.00E-10   | -0.6057864 | 6.51E-20 | -0.0803653 | 0.27684353 |
| 2.55E-17   | -0.3864508 | 5.53E-08   | 0.62276644 | 2.95E-21 | -0.0472626 | 0.52292632 |
| 6.84E-25   | -0.2364592 | 0.00119332 | 0.49343611 | 9.59E-13 | 0.02909836 | 0.69418559 |
| 3.95E-07   | 0.37276771 | 1.74E-07   | -0.5799196 | 5.16E-18 | -0.3332425 | 3.57E-06   |
| 7.93E-17   | 0.21981034 | 0.00264417 | -0.6148901 | 1.27E-20 | -0.7972463 | 5.64E-42   |
| 8.01E-21   | -0.1264762 | 0.086254   | 0.37496806 | 1.45E-07 | 0.01695238 | 0.81884488 |
| 0.0112398  | 0.42587831 | 1.51E-09   | -0.4719162 | 1.19E-11 | -0.6784381 | 2.69E-26   |
| 1.57E-18   | -0.3678123 | 2.60E-07   | 0.49397512 | 8.99E-13 | -0.0686971 | 0.35281325 |
| 3.89E-54   | -0.4405608 | 3.48E-10   | 0.73145813 | 2.97E-32 | 0.4362436  | 5.40E-10   |
| 3.16E-43   | 0.4678945  | 1.88E-11   | -0.7595263 | 5.12E-36 | -0.5019716 | 3.36E-13   |
| 5.76E-14   | -0.4459529 | 2.00E-10   | 0.68747159 | 3.20E-27 | 0.07365969 | 0.31903456 |
| 7.67E-15   | -0.1058319 | 0.15164562 | 0.47708228 | 6.62E-12 | 0.68646842 | 4.07E-27   |
| 4.46E-39   | -0.3370096 | 2.72E-06   | 0.69533188 | 4.70E-28 | 0.5115427  | 9.99E-14   |
| 4.16E-27   | 0.25955886 | 0.00035999 | -0.6883627 | 2.58E-27 | -0.4210043 | 2.41E-09   |
| 8.50E-24   | 0.3141147  | 1.34E-05   | -0.6399983 | 1.05E-22 | -0.4445915 | 2.30E-10   |
| 4.15E-37   | 0.59993064 | 1.81E-19   | -0.7854525 | 5.53E-40 | -0.4836121 | 3.10E-12   |
| 9.74E-34   | 0.11674144 | 0.11353346 | -0.5960212 | 3.55E-19 | -0.2623785 | 0.00030861 |
| 3.94E-14   | -0.3844299 | 6.57E-08   | 0.73356756 | 1.61E-32 | 0.62221903 | 3.27E-21   |
| 2.78E-23   | -0.4424483 | 2.87E-10   | 0.65574343 | 4.10E-24 | 0.0579638  | 0.43321114 |
| 1.97E-30   | -0.3403048 | 2.14E-06   | 0.62802323 | 1.09E-21 | 0.3065989  | 2.19E-05   |
| 2.21E-55   | -0.5784753 | 6.51E-18   | 0.92530811 | 5.49E-79 | 0.50434174 | 2.50E-13   |



|            |            |            |            |          |            |            |
|------------|------------|------------|------------|----------|------------|------------|
| 2.30E-29   | -0.46904   | 1.65E-11   | 0.69248897 | 9.47E-28 | 0.14771278 | 0.04480143 |
| 1.65E-44   | -0.5413467 | 1.78E-15   | 0.86877986 | 9.44E-58 | 0.7690212  | 2.07E-37   |
| 2.14E-44   | -0.5543739 | 2.69E-16   | 0.91809839 | 1.80E-75 | 0.81965096 | 3.79E-46   |
| 0.15625549 | 0.16594512 | 0.02397843 | -0.3277778 | 5.25E-06 | -0.3784581 | 1.09E-07   |
| 1.35E-51   | -0.3175479 | 1.06E-05   | 0.88694233 | 2.69E-63 | 0.59679826 | 3.11E-19   |
| 8.34E-24   | -0.4489287 | 1.46E-10   | 0.89440455 | 7.42E-66 | 0.77126073 | 9.52E-38   |
| 4.18E-13   | -0.4985736 | 5.12E-13   | 0.55147263 | 4.12E-16 | 0.26461672 | 0.00027276 |
| 7.69E-30   | -0.5148406 | 6.52E-14   | 0.89896999 | 1.61E-67 | 0.71703572 | 1.69E-30   |
| 7.05E-34   | -0.4789258 | 5.35E-12   | 0.81361488 | 5.73E-45 | 0.32746757 | 5.37E-06   |
| 2.31E-13   | 0.13569    | 0.06553353 | 0.51399298 | 7.28E-14 | 0.25270255 | 0.00051983 |
| 2.77E-06   | 0.12328807 | 0.09454052 | -0.3804158 | 9.23E-08 | -0.5731185 | 1.53E-17   |
| 7.25E-27   | 0.51635418 | 5.35E-14   | -0.7470634 | 2.77E-34 | -0.2092767 | 0.00425107 |
| 2.69E-06   | -0.441088  | 3.30E-10   | 0.70441962 | 4.74E-29 | 0.57737192 | 7.77E-18   |
| 2.85E-13   | -0.4164778 | 3.71E-09   | 0.79213586 | 4.27E-41 | 0.60525363 | 7.15E-20   |
| 4.91E-24   | -0.4753574 | 8.07E-12   | 0.89433198 | 7.87E-66 | 0.61255491 | 1.94E-20   |
| 2.77E-33   | -0.5070517 | 1.77E-13   | 0.72726987 | 9.87E-32 | 0.68365513 | 7.93E-27   |
| 0.02755874 | 0.04070061 | 0.58227551 | -0.4091405 | 7.37E-09 | -0.4912493 | 1.25E-12   |
| 9.01E-28   | 0.37473145 | 1.48E-07   | -0.6114473 | 2.37E-20 | -0.3926258 | 3.24E-08   |
| 5.71E-09   | -0.2702801 | 0.00019861 | 0.46196417 | 3.62E-11 | 0.69319173 | 7.97E-28   |
| 8.85E-55   | -0.547547  | 7.31E-16   | 0.89960921 | 9.30E-68 | 0.50642321 | 1.92E-13   |
| 1.55E-15   | 0.33255055 | 3.75E-06   | -0.6325236 | 4.58E-22 | -0.4108491 | 6.29E-09   |
| 8.68E-15   | 0.40544493 | 1.03E-08   | -0.6577508 | 2.68E-24 | -0.625069  | 1.91E-21   |
| 3.81E-06   | 0.30078165 | 3.18E-05   | -0.6196162 | 5.32E-21 | -0.5071512 | 1.75E-13   |
| 3.45E-06   | 0.30102134 | 3.13E-05   | -0.6010129 | 1.50E-19 | -0.0972261 | 0.18798066 |
| 3.15E-09   | -0.4029992 | 1.29E-08   | 0.73220354 | 2.40E-32 | 0.40589863 | 9.92E-09   |
| 0.06607523 | -0.3460012 | 1.41E-06   | 0.44403947 | 2.44E-10 | 0.12302584 | 0.09524938 |
| 9.16E-18   | 0.34064531 | 2.09E-06   | -0.5702861 | 2.38E-17 | 0.03106185 | 0.67468668 |
| 0.06704226 | 0.20782862 | 0.00453009 | -0.4281013 | 1.21E-09 | -0.5771339 | 8.07E-18   |
| 7.82E-25   | 0.49019432 | 1.42E-12   | -0.8259175 | 2.03E-47 | -0.7319353 | 2.59E-32   |
| 4.37E-09   | 0.35407575 | 7.64E-07   | -0.5792039 | 5.79E-18 | -0.4895078 | 1.54E-12   |
| 0.00026267 | 0.30259347 | 2.83E-05   | -0.3920663 | 3.41E-08 | -0.5278846 | 1.15E-14   |
| 1.73E-31   | 0.41881962 | 2.97E-09   | -0.8039385 | 3.65E-43 | -0.5817694 | 3.82E-18   |
| 0.02985113 | 0.31802801 | 1.03E-05   | -0.4239248 | 1.82E-09 | -0.5040871 | 2.58E-13   |
| 0.01560391 | -0.1630319 | 0.02660261 | 0.42187113 | 2.22E-09 | 0.63709812 | 1.87E-22   |
| 2.38E-17   | 0.45679453 | 6.34E-11   | -0.4001041 | 1.67E-08 | -0.2916365 | 5.63E-05   |
| 1.34E-29   | 0.4182764  | 3.13E-09   | -0.8773107 | 3.02E-60 | -0.6714373 | 1.33E-25   |
| 2.36E-28   | -0.4987302 | 5.02E-13   | 0.85830145 | 6.45E-55 | 0.52080752 | 2.98E-14   |
| 2.19E-25   | -0.4902559 | 1.41E-12   | 0.90448788 | 1.23E-69 | 0.60788116 | 4.49E-20   |
| 8.95E-10   | -0.3722704 | 1.81E-07   | 0.57982141 | 5.24E-18 | 0.55473716 | 2.55E-16   |
| 1.39E-23   | -0.5388384 | 2.53E-15   | 0.86985663 | 4.68E-58 | 0.73845481 | 3.80E-33   |
| 2.48E-50   | -0.4044304 | 1.13E-08   | 0.94115066 | 3.85E-88 | 0.65305282 | 7.23E-24   |
| 1.15E-20   | -0.435957  | 5.56E-10   | 0.85963943 | 2.89E-55 | 0.54314006 | 1.38E-15   |
| 3.09E-67   | -0.4943798 | 8.55E-13   | 0.92482364 | 9.70E-79 | 0.64060286 | 9.29E-23   |
| 2.80E-13   | -0.4111714 | 6.11E-09   | 0.77111008 | 1.00E-37 | 0.7808846  | 3.03E-39   |
| 1.55E-50   | -0.482281  | 3.62E-12   | 0.94046499 | 1.08E-87 | 0.78494943 | 6.68E-40   |
| 1.18E-38   | -0.5231524 | 2.18E-14   | 0.86407987 | 1.89E-56 | 0.35195569 | 8.98E-07   |

|            |            |            |            |            |            |            |
|------------|------------|------------|------------|------------|------------|------------|
| 1.62E-34   | -0.4213258 | 2.34E-09   | 0.7907188  | 7.40E-41   | 0.29057643 | 6.01E-05   |
| 1.37E-35   | -0.5507364 | 4.59E-16   | 0.94091577 | 5.48E-88   | 0.62975192 | 7.83E-22   |
| 6.18E-11   | -0.4224635 | 2.10E-09   | 0.76742749 | 3.59E-37   | 0.40219065 | 1.39E-08   |
| 2.57E-34   | 0.66393781 | 7.02E-25   | -0.9317546 | 1.92E-82   | -0.5599929 | 1.16E-16   |
| 1.35E-31   | 0.40150721 | 1.48E-08   | -0.6674192 | 3.26E-25   | -0.5111416 | 1.05E-13   |
| 5.09E-29   | -0.4418806 | 3.04E-10   | 0.85550742 | 3.37E-54   | 0.39105423 | 3.72E-08   |
| 3.47E-05   | 0.3497729  | 1.06E-06   | -0.5949441 | 4.27E-19   | -0.3925155 | 3.28E-08   |
| 0.00419561 | 0.39478875 | 2.68E-08   | -0.5281587 | 1.11E-14   | -0.5242732 | 1.88E-14   |
| 1.16E-31   | -0.4642521 | 2.81E-11   | 0.86104797 | 1.23E-55   | 0.57804071 | 6.98E-18   |
| 2.04E-32   | 0.52554155 | 1.58E-14   | -0.795125  | 1.32E-41   | -0.564724  | 5.64E-17   |
| 0.71013198 | 0.314009   | 1.35E-05   | -0.3540846 | 7.63E-07   | -0.2716609 | 0.00018363 |
| 0.01803742 | 0.39540356 | 2.54E-08   | -0.5399917 | 2.15E-15   | -0.4977713 | 5.65E-13   |
| 6.56E-13   | 0.48143254 | 4.00E-12   | -0.7645727 | 9.49E-37   | -0.5069128 | 1.80E-13   |
| 1.64E-27   | 0.52713766 | 1.27E-14   | -0.6979394 | 2.46E-28   | -0.7139154 | 3.92E-30   |
| 4.35E-33   | 0.45362394 | 8.91E-11   | -0.7866579 | 3.51E-40   | -0.5823232 | 3.49E-18   |
| 0.00248835 | -0.2762546 | 0.00014104 | 0.4978594  | 5.59E-13   | 0.69592501 | 4.06E-28   |
| 0.00988487 | 0.14320972 | 0.05181154 | 0.10943704 | 0.13810806 | 0.13917471 | 0.05884418 |
| 0.00143442 | -0.3416491 | 1.94E-06   | 0.59130324 | 7.90E-19   | 0.3297068  | 4.59E-06   |
| 1.45E-21   | -0.2990637 | 3.55E-05   | 0.68810193 | 2.75E-27   | 0.12220317 | 0.09750054 |
| 0.00016567 | -0.3731881 | 1.68E-07   | 0.61760885 | 7.71E-21   | 0.52183685 | 2.60E-14   |
| 0.00014298 | 0.41482242 | 4.34E-09   | -0.4957161 | 7.27E-13   | -0.3173976 | 1.07E-05   |
| 6.51E-33   | 0.33585833 | 2.96E-06   | -0.7188923 | 1.02E-30   | -0.5748672 | 1.16E-17   |
| 3.12E-30   | 0.52172168 | 2.64E-14   | -0.6058327 | 6.46E-20   | -0.3409786 | 2.04E-06   |
| 2.62E-27   | 0.37712668 | 1.21E-07   | -0.698059  | 2.38E-28   | -0.6516475 | 9.71E-24   |
| 1.85E-56   | 0.43031608 | 9.75E-10   | -0.8133039 | 6.57E-45   | -0.5757922 | 1.00E-17   |
| 4.60E-05   | 0.38073416 | 8.98E-08   | -0.6458376 | 3.22E-23   | -0.2639366 | 0.00028322 |
| 0.00163258 | 0.36252419 | 3.96E-07   | -0.6147891 | 1.29E-20   | -0.4402974 | 3.58E-10   |
| 3.22E-30   | 0.31760531 | 1.06E-05   | -0.6560608 | 3.83E-24   | -0.4549853 | 7.70E-11   |
| 2.13E-07   | 0.47650748 | 7.08E-12   | -0.6492974 | 1.58E-23   | -0.6032965 | 1.01E-19   |
| 1.70E-11   | -0.4141204 | 4.64E-09   | 0.65495774 | 4.84E-24   | 0.05005184 | 0.49866701 |
| 1.21E-36   | -0.4304108 | 9.66E-10   | 0.79289915 | 3.17E-41   | 0.34905276 | 1.12E-06   |
| 1.46E-42   | -0.4722352 | 1.15E-11   | 0.81812966 | 7.59E-46   | 0.36663396 | 2.85E-07   |
| 1.07E-39   | -0.4559581 | 6.94E-11   | 0.84376879 | 2.43E-51   | 0.45679511 | 6.34E-11   |
| 8.71E-31   | 0.48716371 | 2.04E-12   | -0.9222281 | 1.92E-77   | -0.5694079 | 2.73E-17   |
| 7.56E-13   | 0.54794949 | 6.89E-16   | -0.786506  | 3.72E-40   | -0.483753  | 3.05E-12   |
| 3.60E-25   | -0.507092  | 1.76E-13   | 0.86163448 | 8.58E-56   | 0.72786389 | 8.34E-32   |
| 0.07217007 | -0.0961503 | 0.19293672 | 0.36727133 | 2.71E-07   | -0.0477688 | 0.51847912 |
| 1.89E-45   | 0.51453288 | 6.78E-14   | -0.8410184 | 1.05E-50   | -0.5616859 | 8.97E-17   |
| 1.38E-10   | 0.31857441 | 9.90E-06   | -0.3832626 | 7.26E-08   | -0.3405835 | 2.10E-06   |
| 4.50E-46   | 0.52777713 | 1.17E-14   | -0.789941  | 1.00E-40   | -0.516394  | 5.32E-14   |
| 2.55E-21   | 0.20891256 | 0.00431974 | -0.5163403 | 5.36E-14   | -0.5456633 | 9.59E-16   |
| 6.21E-33   | 0.457521   | 5.86E-11   | -0.777601  | 1.00E-38   | -0.3896094 | 4.22E-08   |
| 3.28E-07   | -0.4564027 | 6.61E-11   | 0.62803606 | 1.09E-21   | 0.73937042 | 2.89E-33   |
| 5.08E-28   | -0.487826  | 1.88E-12   | 0.78796108 | 2.14E-40   | 0.89826102 | 2.96E-67   |
| 1.61E-17   | -0.4277509 | 1.26E-09   | 0.67425146 | 7.03E-26   | 0.16396438 | 0.02573708 |
| 9.33E-19   | -0.4894747 | 1.55E-12   | 0.80534312 | 2.02E-43   | 0.29718973 | 3.99E-05   |

|            |            |            |            |           |            |            |
|------------|------------|------------|------------|-----------|------------|------------|
| 1.47E-06   | -0.332897  | 3.66E-06   | 0.67939877 | 2.15E-26  | 0.35942355 | 5.05E-07   |
| 1.28E-09   | -0.4523801 | 1.02E-10   | 0.74084024 | 1.86E-33  | 0.52890451 | 1.00E-14   |
| 7.26E-17   | -0.5440693 | 1.21E-15   | 0.86554657 | 7.50E-57  | 0.73456381 | 1.20E-32   |
| 1.72E-12   | -0.3406777 | 2.08E-06   | 0.62958735 | 8.08E-22  | 0.2202184  | 0.00259483 |
| 2.99E-12   | 0.58090237 | 4.40E-18   | -0.4530901 | 9.43E-11  | -0.3758223 | 1.35E-07   |
| 7.64E-22   | -0.5191667 | 3.70E-14   | 0.79851942 | 3.38E-42  | 0.38222506 | 7.92E-08   |
| 5.57E-24   | 0.43559613 | 5.76E-10   | -0.7894287 | 1.22E-40  | -0.8242244 | 4.52E-47   |
| 1.46E-23   | 0.617731   | 7.54E-21   | -0.7866385 | 3.54E-40  | -0.8122726 | 1.03E-44   |
| 2.89E-26   | -0.2950539 | 4.56E-05   | 0.63968562 | 1.12E-22  | 0.10097449 | 0.17144021 |
| 4.70E-21   | 0.32417862 | 6.74E-06   | -0.8241728 | 4.63E-47  | -0.3750937 | 1.44E-07   |
| 4.59E-20   | 0.3453433  | 1.48E-06   | -0.6727915 | 9.79E-26  | -0.6046624 | 7.94E-20   |
| 1.67E-06   | 0.41853588 | 3.06E-09   | -0.5086941 | 1.44E-13  | -0.0499565 | 0.49948649 |
| 0.66408924 | -0.3066693 | 2.18E-05   | 0.38120066 | 8.64E-08  | 0.19893944 | 0.00663322 |
| 9.07E-17   | -0.4627275 | 3.33E-11   | 0.67751155 | 3.33E-26  | 0.6292465  | 8.63E-22   |
| 2.22E-10   | -0.4573053 | 6.00E-11   | 0.74487846 | 5.43E-34  | 0.64523188 | 3.65E-23   |
| 1.23E-23   | -0.4683586 | 1.78E-11   | 0.89310867 | 2.13E-65  | 0.6536728  | 6.35E-24   |
| 2.33E-30   | 0.47311261 | 1.04E-11   | -0.7888425 | 1.53E-40  | -0.6067453 | 5.50E-20   |
| 5.57E-07   | 0.03280034 | 0.65760057 | -0.5077536 | 1.62E-13  | 0.16726683 | 0.02286328 |
| 9.06E-07   | -0.4535744 | 8.95E-11   | 0.64345957 | 5.23E-23  | 0.65143254 | 1.02E-23   |
| 2.06E-25   | 0.21776723 | 0.00290421 | -0.5337302 | 5.17E-15  | -0.5505126 | 4.75E-16   |
| 1.97E-09   | -0.4777642 | 6.12E-12   | 0.76087495 | 3.28E-36  | 0.62699207 | 1.33E-21   |
| 4.67E-30   | -0.5979093 | 2.57E-19   | 0.92267035 | 1.16E-77  | 0.76093145 | 3.22E-36   |
| 9.04E-33   | -0.5019334 | 3.37E-13   | 0.88364464 | 3.20E-62  | 0.49325935 | 9.80E-13   |
| 3.41E-14   | 0.21054314 | 0.00401982 | -0.5632587 | 7.06E-17  | -0.6971892 | 2.96E-28   |
| 1.95E-09   | 0.14123756 | 0.05515644 | -0.4561873 | 6.77E-11  | 0.19137314 | 0.00906807 |
| 1.63E-13   | 0.32678789 | 5.63E-06   | -0.6629531 | 8.71E-25  | -0.5812778 | 4.14E-18   |
| 1.66E-26   | 0.33667207 | 2.79E-06   | -0.8124282 | 9.66E-45  | -0.7378358 | 4.58E-33   |
| 0.0512535  | 0.55425723 | 2.73E-16   | -0.6165198 | 9.42E-21  | -0.1334568 | 0.07013841 |
| 4.75E-15   | 0.45277929 | 9.74E-11   | -0.834568  | 2.92E-49  | -0.6115159 | 2.34E-20   |
| 6.54E-09   | -0.2634336 | 0.0002912  | 0.51374071 | 7.52E-14  | 0.23220867 | 0.0014699  |
| 8.03E-17   | 0.38826086 | 4.74E-08   | -0.765825  | 6.21E-37  | -0.6995429 | 1.64E-28   |
| 4.77E-08   | 0.5521351  | 3.74E-16   | -0.6409142 | 8.73E-23  | -0.6343436 | 3.21E-22   |
| 1.45E-32   | -0.5528676 | 3.36E-16   | 0.88112781 | 2.01E-61  | 0.67894558 | 2.39E-26   |
| 4.39E-50   | -0.6024769 | 1.16E-19   | 0.97122735 | 5.59E-116 | 0.76054379 | 3.66E-36   |
| 2.15E-43   | -0.5576099 | 1.66E-16   | 0.9661924  | 1.14E-109 | 0.74383741 | 7.48E-34   |
| 0.013115   | -0.3281025 | 5.13E-06   | 0.4262808  | 1.45E-09  | 0.28787146 | 7.09E-05   |
| 4.00E-35   | 0.48068671 | 4.36E-12   | -0.6511806 | 1.07E-23  | -0.257964  | 0.00039246 |
| 0.00018341 | 0.08012156 | 0.27830778 | -0.3827307 | 7.59E-08  | -0.3950445 | 2.62E-08   |
| 1.39E-11   | 0.35025143 | 1.02E-06   | -0.7242165 | 2.34E-31  | -0.3581116 | 5.59E-07   |
| 4.51E-36   | 0.43109649 | 9.03E-10   | -0.7924916 | 3.71E-41  | -0.5356077 | 3.98E-15   |
| 6.28E-10   | 0.46086949 | 4.08E-11   | -0.7007513 | 1.21E-28  | -0.5830943 | 3.08E-18   |
| 1.99E-14   | 0.52798927 | 1.14E-14   | -0.7589467 | 6.20E-36  | -0.3972474 | 2.16E-08   |
| 1.19E-23   | -0.5205199 | 3.09E-14   | 0.74350096 | 8.29E-34  | 0.26629103 | 0.00024852 |
| 2.89E-14   | 0.38786244 | 4.90E-08   | -0.6859338 | 4.62E-27  | -0.5581473 | 1.53E-16   |
| 2.88E-32   | -0.4590176 | 4.99E-11   | 0.78332733 | 1.23E-39  | 0.35524024 | 6.98E-07   |
| 0.00062931 | -0.4532191 | 9.30E-11   | 0.5661712  | 4.52E-17  | 0.51034968 | 1.16E-13   |

|           |            |            |            |           |            |            |
|-----------|------------|------------|------------|-----------|------------|------------|
| 5.16E-06  | -0.3222092 | 7.72E-06   | 0.60528129 | 7.12E-20  | 0.38320125 | 7.30E-08   |
| 3.24E-41  | -0.5073247 | 1.71E-13   | 0.96317717 | 2.46E-106 | 0.69987475 | 1.51E-28   |
| 3.06E-19  | -0.4601912 | 4.39E-11   | 0.73867534 | 3.56E-33  | 0.30127069 | 3.08E-05   |
| 2.14E-22  | 0.38828599 | 4.73E-08   | -0.6170099 | 8.61E-21  | -0.6880226 | 2.80E-27   |
| 0.1224371 | 0.36864997 | 2.43E-07   | -0.4404355 | 3.53E-10  | 0.09466189 | 0.19994992 |
| 6.99E-21  | -0.456486  | 6.55E-11   | 0.89888104 | 1.74E-67  | 0.65927492 | 1.93E-24   |
| 7.82E-17  | -0.490114  | 1.43E-12   | 0.82240042 | 1.06E-46  | 0.8146825  | 3.57E-45   |
| 3.90E-10  | 0.3347337  | 3.21E-06   | -0.407917  | 8.25E-09  | 0.1022843  | 0.16592293 |
| 0.1010723 | 0.54200068 | 1.62E-15   | -0.4133414 | 4.99E-09  | -0.6047155 | 7.87E-20   |
| 1.39E-34  | 0.25222915 | 0.00053298 | -0.634139  | 3.34E-22  | -0.1873015 | 0.01068168 |
| 7.70E-14  | -0.1860082 | 0.01124473 | 0.68966584 | 1.88E-27  | 0.35015239 | 1.03E-06   |
| 1.33E-44  | -0.4775527 | 6.27E-12   | 0.77664697 | 1.41E-38  | 0.28355165 | 9.19E-05   |
| 8.47E-26  | -0.4905937 | 1.35E-12   | 0.88853926 | 7.91E-64  | 0.80132211 | 1.08E-42   |
| 2.12E-09  | -0.2858394 | 8.01E-05   | 0.64458436 | 4.16E-23  | 0.31127675 | 1.61E-05   |
| 6.40E-27  | 0.57601306 | 9.65E-18   | -0.7207727 | 6.08E-31  | -0.6596175 | 1.79E-24   |
| 7.69E-37  | -0.6130337 | 1.78E-20   | 0.82103572 | 2.00E-46  | 0.73331641 | 1.73E-32   |
| 6.04E-19  | 0.25482374 | 0.00046447 | -0.5504207 | 4.81E-16  | -0.6849624 | 5.82E-27   |
| 3.20E-11  | 0.49820483 | 5.36E-13   | -0.6788136 | 2.46E-26  | -0.3811343 | 8.69E-08   |
| 3.83E-43  | 0.48264485 | 3.47E-12   | -0.8274278 | 9.83E-48  | -0.4961047 | 6.93E-13   |
| 1.60E-12  | -0.3471537 | 1.29E-06   | 0.61606635 | 1.02E-20  | 0.28430566 | 8.78E-05   |
| 1.88E-31  | -0.3185546 | 9.91E-06   | 0.63892652 | 1.30E-22  | 0.13642514 | 0.06407285 |
| 4.32E-34  | -0.5415847 | 1.72E-15   | 0.92398488 | 2.58E-78  | 0.5708871  | 2.17E-17   |
| 4.89E-28  | 0.53396576 | 5.00E-15   | -0.7512363 | 7.47E-35  | -0.815556  | 2.42E-45   |
| 1.62E-34  | -0.5462391 | 8.83E-16   | 0.93056609 | 8.81E-82  | 0.5797616  | 5.29E-18   |
| 5.71E-42  | 0.41990101 | 2.68E-09   | -0.6309976 | 6.16E-22  | -0.3170844 | 1.09E-05   |
| 1.19E-23  | -0.5257399 | 1.54E-14   | 0.80523336 | 2.12E-43  | 0.87091791 | 2.33E-58   |
| 2.63E-36  | -0.4618923 | 3.64E-11   | 0.7391846  | 3.06E-33  | 0.30685023 | 2.15E-05   |
| 3.64E-28  | -0.4244172 | 1.74E-09   | 0.8166681  | 1.47E-45  | 0.43419088 | 6.63E-10   |
| 5.78E-35  | 0.23650083 | 0.00119086 | -0.5545933 | 2.60E-16  | -0.2331006 | 0.00140742 |
| 6.78E-39  | 0.48257956 | 3.50E-12   | -0.7283117 | 7.34E-32  | -0.5336451 | 5.23E-15   |
| 1.59E-09  | 0.74262547 | 1.08E-33   | -0.759405  | 5.33E-36  | -0.4413069 | 3.23E-10   |
| 6.56E-21  | 0.5194472  | 3.56E-14   | -0.7741333 | 3.46E-38  | -0.5200918 | 3.27E-14   |
| 5.52E-26  | 0.58117053 | 4.21E-18   | -0.7592594 | 5.59E-36  | -0.7349823 | 1.06E-32   |
| 2.33E-22  | -0.4757122 | 7.75E-12   | 0.87760502 | 2.46E-60  | 0.73247944 | 2.21E-32   |
| 3.33E-11  | -0.3370596 | 2.71E-06   | 0.77347001 | 4.38E-38  | 0.5218974  | 2.58E-14   |
| 1.38E-19  | -0.3680282 | 2.55E-07   | 0.5662667  | 4.45E-17  | 0.45243818 | 1.01E-10   |
| 2.73E-34  | -0.5096636 | 1.27E-13   | 0.93007299 | 1.65E-81  | 0.53147045 | 7.06E-15   |
| 4.53E-09  | 0.52443875 | 1.83E-14   | -0.6987139 | 2.02E-28  | -0.4546931 | 7.94E-11   |
| 8.01E-17  | 0.4386498  | 4.23E-10   | -0.8067211 | 1.13E-43  | -0.471039  | 1.32E-11   |
| 6.17E-21  | -0.5232634 | 2.15E-14   | 0.71829446 | 1.20E-30  | 0.3685099  | 2.46E-07   |
| 1.07E-20  | -0.0289598 | 0.6955697  | 0.71764257 | 1.43E-30  | 0.43256817 | 7.80E-10   |
| 1.57E-52  | 0.63623736 | 2.21E-22   | -0.9176071 | 3.04E-75  | -0.579404  | 5.60E-18   |
| 1.71E-33  | -0.5673634 | 3.76E-17   | 0.89627653 | 1.58E-66  | 0.50552224 | 2.15E-13   |
| 4.29E-32  | 0.21985268 | 0.00263901 | -0.7597004 | 4.83E-36  | -0.5676831 | 3.57E-17   |
| 1.53E-32  | -0.534257  | 4.81E-15   | 0.83632626 | 1.19E-49  | 0.40835517 | 7.92E-09   |
| 1.18E-22  | -0.464404  | 2.76E-11   | 0.72029141 | 6.94E-31  | 0.78019534 | 3.90E-39   |

|            |            |            |            |          |            |            |
|------------|------------|------------|------------|----------|------------|------------|
| 1.49E-08   | -0.4811835 | 4.12E-12   | 0.69360158 | 7.21E-28 | 0.2400132  | 0.0009996  |
| 2.90E-33   | -0.4980277 | 5.47E-13   | 0.82264006 | 9.51E-47 | 0.31567255 | 1.20E-05   |
| 1.74E-22   | -0.4465032 | 1.89E-10   | 0.77707475 | 1.21E-38 | 0.34606953 | 1.40E-06   |
| 4.04E-12   | -0.3241092 | 6.78E-06   | 0.69217557 | 1.02E-27 | 0.36521051 | 3.20E-07   |
| 1.32E-27   | 0.37487753 | 1.46E-07   | -0.6630614 | 8.50E-25 | -0.3720929 | 1.84E-07   |
| 9.75E-16   | -0.4418174 | 3.06E-10   | 0.78683008 | 3.29E-40 | 0.77079899 | 1.12E-37   |
| 6.42E-09   | 0.56367617 | 6.62E-17   | -0.7079942 | 1.88E-29 | -0.116175  | 0.11530787 |
| 7.58E-22   | 0.57704516 | 8.18E-18   | -0.714366  | 3.48E-30 | -0.3996861 | 1.74E-08   |
| 1.72E-16   | -0.3104651 | 1.70E-05   | 0.73691745 | 6.01E-33 | 0.20718763 | 0.00465877 |
| 2.70E-38   | -0.5014425 | 3.59E-13   | 0.69855427 | 2.11E-28 | 0.26533869 | 0.00026205 |
| 7.20E-22   | 0.48273293 | 3.44E-12   | -0.5796121 | 5.42E-18 | -0.6301042 | 7.31E-22   |
| 3.28E-21   | 0.53341681 | 5.40E-15   | -0.8313374 | 1.46E-48 | -0.6831939 | 8.85E-27   |
| 6.42E-25   | 0.52769255 | 1.18E-14   | -0.6053349 | 7.05E-20 | -0.6380958 | 1.53E-22   |
| 9.65E-52   | 0.46938396 | 1.59E-11   | -0.7286264 | 6.71E-32 | -0.4687641 | 1.70E-11   |
| 1.03E-34   | -0.5400013 | 2.15E-15   | 0.85650906 | 1.87E-54 | 0.4728176  | 1.08E-11   |
| 4.16E-31   | -0.5455649 | 9.73E-16   | 0.81754973 | 9.87E-46 | 0.51080609 | 1.10E-13   |
| 3.83E-06   | -0.2295471 | 0.00167172 | 0.48480656 | 2.69E-12 | -0.0716792 | 0.33225457 |
| 0.3799683  | -0.2373334 | 0.00114272 | 0.44356409 | 2.56E-10 | 0.13155986 | 0.07425385 |
| 4.92E-22   | 0.38594585 | 5.78E-08   | -0.6006757 | 1.59E-19 | -0.19595   | 0.00751519 |
| 0.53038854 | -0.1266943 | 0.08570896 | 0.36633282 | 2.92E-07 | 0.14446665 | 0.04976888 |
| 3.10E-18   | 0.47504315 | 8.37E-12   | -0.7729172 | 5.32E-38 | -0.6302977 | 7.05E-22   |
| 5.53E-07   | -0.4503848 | 1.26E-10   | 0.65352128 | 6.56E-24 | 0.72060697 | 6.37E-31   |
| 2.38E-68   | -0.5522383 | 3.68E-16   | 0.8978276  | 4.27E-67 | 0.59375583 | 5.22E-19   |
| 2.60E-38   | -0.4059047 | 9.92E-09   | 0.63753432 | 1.71E-22 | 0.14937243 | 0.04242636 |
| 0.365049   | -0.2769771 | 0.00013525 | 0.45972858 | 4.61E-11 | 0.50466892 | 2.39E-13   |
| 9.31E-10   | 0.32054053 | 8.66E-06   | -0.4762608 | 7.28E-12 | -0.3709937 | 2.01E-07   |
| 1.52E-45   | -0.5150083 | 6.38E-14   | 0.84896772 | 1.41E-52 | 0.59172612 | 7.36E-19   |
| 6.55E-17   | -0.4300452 | 1.00E-09   | 0.79955505 | 2.22E-42 | 0.34181247 | 1.92E-06   |
| 2.74E-16   | 0.34548431 | 1.46E-06   | -0.7141626 | 3.67E-30 | -0.5342344 | 4.82E-15   |
| 2.59E-26   | 0.34287054 | 1.77E-06   | -0.791595  | 5.27E-41 | -0.7815209 | 2.39E-39   |
| 4.94E-12   | 0.21250253 | 0.0036843  | -0.3634144 | 3.69E-07 | 0.15818982 | 0.03150852 |
| 5.60E-25   | -0.5671356 | 3.89E-17   | 0.90918756 | 1.51E-71 | 0.51607042 | 5.55E-14   |
| 3.94E-24   | -0.5209084 | 2.94E-14   | 0.73190726 | 2.61E-32 | 0.18230602 | 0.01300352 |
| 5.11E-16   | -0.5014037 | 3.60E-13   | 0.74049425 | 2.06E-33 | 0.80937177 | 3.64E-44   |
| 7.50E-51   | 0.42073361 | 2.48E-09   | -0.8895574 | 3.58E-64 | -0.6715654 | 1.29E-25   |
| 2.91E-26   | 0.40561621 | 1.02E-08   | -0.6542006 | 5.68E-24 | -0.1465455 | 0.04653765 |
| 1.68E-47   | -0.5517206 | 3.98E-16   | 0.83124724 | 1.53E-48 | 0.40469361 | 1.11E-08   |
| 1.37E-15   | -0.4855116 | 2.48E-12   | 0.8297051  | 3.26E-48 | 0.4911326  | 1.27E-12   |
| 2.96E-33   | -0.5786889 | 6.29E-18   | 0.93790619 | 4.49E-86 | 0.69668243 | 3.36E-28   |
| 9.84E-25   | -0.3702151 | 2.14E-07   | 0.79520493 | 1.27E-41 | 0.28736635 | 7.31E-05   |
| 2.66E-32   | 0.3025501  | 2.84E-05   | -0.6557548 | 4.09E-24 | -0.5153157 | 6.13E-14   |
| 6.11E-56   | -0.5915906 | 7.53E-19   | 0.87115688 | 1.99E-58 | 0.58020153 | 4.93E-18   |
| 2.20E-37   | 0.41250766 | 5.39E-09   | -0.6592757 | 1.93E-24 | -0.3707761 | 2.04E-07   |
| 4.84E-34   | 0.60883524 | 3.79E-20   | -0.8275837 | 9.12E-48 | -0.555533  | 2.26E-16   |
| 2.19E-07   | 0.27466612 | 0.00015459 | -0.65332   | 6.84E-24 | -0.2547444 | 0.00046644 |
| 0.00035584 | 0.15635902 | 0.03355423 | -0.5404517 | 2.02E-15 | -0.545965  | 9.18E-16   |

|            |            |            |            |          |            |            |
|------------|------------|------------|------------|----------|------------|------------|
| 3.80E-47   | -0.556966  | 1.83E-16   | 0.85652133 | 1.86E-54 | 0.51336043 | 7.90E-14   |
| 6.61E-27   | -0.380386  | 9.25E-08   | 0.76814116 | 2.81E-37 | 0.41097158 | 6.22E-09   |
| 1.97E-33   | -0.4945744 | 8.35E-13   | 0.82581576 | 2.13E-47 | 0.51737405 | 4.68E-14   |
| 3.31E-19   | 0.55910195 | 1.33E-16   | -0.7468559 | 2.95E-34 | -0.7642674 | 1.05E-36   |
| 0.02250029 | -0.4156206 | 4.03E-09   | 0.56194484 | 8.63E-17 | 0.42723759 | 1.32E-09   |
| 4.81E-53   | -0.5424254 | 1.52E-15   | 0.85177812 | 2.90E-53 | 0.4555537  | 7.24E-11   |
| 4.61E-23   | -0.3979065 | 2.04E-08   | 0.80610683 | 1.47E-43 | 0.500472   | 4.05E-13   |
| 9.37E-43   | 0.66122425 | 1.27E-24   | -0.8748641 | 1.64E-59 | -0.7233339 | 2.99E-31   |
| 3.89E-31   | -0.4861556 | 2.30E-12   | 0.86569182 | 6.84E-57 | 0.74658877 | 3.20E-34   |
| 8.78E-05   | -0.5648236 | 5.56E-17   | 0.6562662  | 3.67E-24 | 0.55290029 | 3.34E-16   |
| 8.11E-51   | -0.5460466 | 9.08E-16   | 0.65425451 | 5.62E-24 | 0.6128687  | 1.83E-20   |
| 1.48E-34   | -0.2208598 | 0.00251897 | 0.75562613 | 1.83E-35 | 0.41789075 | 3.25E-09   |
| 5.69E-27   | -0.4217663 | 2.24E-09   | 0.62809778 | 1.08E-21 | 0.48356676 | 3.12E-12   |
| 1.07E-31   | 0.34859028 | 1.16E-06   | -0.6154123 | 1.15E-20 | -0.242501  | 0.00088166 |
| 1.30E-07   | -0.5308457 | 7.69E-15   | 0.70900623 | 1.44E-29 | 0.57365372 | 1.40E-17   |
| 5.68E-18   | -0.5700183 | 2.49E-17   | 0.83543482 | 1.88E-49 | 0.66779651 | 3.00E-25   |
| 0.00042353 | 0.3348584  | 3.18E-06   | -0.5059322 | 2.04E-13 | 0.18030083 | 0.01405339 |
| 4.65E-14   | -0.5086315 | 1.45E-13   | 0.80161526 | 9.55E-43 | 0.69645642 | 3.56E-28   |
| 3.73E-55   | 0.45628006 | 6.70E-11   | -0.8911489 | 1.02E-64 | -0.7519225 | 6.01E-35   |
| 3.63E-32   | -0.5104383 | 1.15E-13   | 0.69738373 | 2.82E-28 | 0.26426053 | 0.0002782  |
| 1.63E-12   | -0.5910532 | 8.24E-19   | 0.66935426 | 2.12E-25 | 0.5964197  | 3.32E-19   |
| 7.54E-05   | -0.195929  | 0.00752174 | 0.3145634  | 1.30E-05 | -0.1375406 | 0.06190749 |
| 8.05E-27   | 0.53442079 | 4.70E-15   | -0.8261472 | 1.82E-47 | -0.235453  | 0.0012541  |
| 1.04E-52   | 0.55341261 | 3.10E-16   | -0.8931479 | 2.06E-65 | -0.7512184 | 7.51E-35   |
| 1.44E-28   | 0.36485631 | 3.29E-07   | -0.750863  | 8.40E-35 | -0.7959323 | 9.54E-42   |
| 2.75E-26   | -0.3928386 | 3.19E-08   | 0.73414854 | 1.36E-32 | 0.71039176 | 1.00E-29   |
| 1.57E-38   | -0.5714009 | 2.00E-17   | 0.90356688 | 2.82E-69 | 0.55347218 | 3.07E-16   |
| 1.85E-27   | -0.4019893 | 1.41E-08   | 0.67164464 | 1.27E-25 | 0.21121921 | 0.00390106 |
| 3.55E-47   | -0.4362433 | 5.40E-10   | 0.76520084 | 7.68E-37 | 0.3156155  | 1.21E-05   |
| 1.42E-61   | -0.5548592 | 2.50E-16   | 0.83386801 | 4.15E-49 | 0.44046607 | 3.52E-10   |
| 1.24E-34   | -0.5769073 | 8.37E-18   | 0.76378707 | 1.24E-36 | 0.29992378 | 3.36E-05   |
| 6.15E-53   | -0.4110797 | 6.16E-09   | 0.75853443 | 7.10E-36 | 0.31915909 | 9.51E-06   |
| 4.37E-32   | -0.475235  | 8.19E-12   | 0.77718492 | 1.16E-38 | 0.59244331 | 6.52E-19   |
| 6.98E-39   | -0.4118229 | 5.75E-09   | 0.78112845 | 2.77E-39 | 0.28851825 | 6.81E-05   |
| 6.92E-51   | -0.385743  | 5.88E-08   | 0.79900228 | 2.78E-42 | 0.33846725 | 2.45E-06   |
| 0.05688798 | -0.2618025 | 0.00031852 | 0.47443963 | 8.96E-12 | 0.45891203 | 5.04E-11   |
| 2.53E-21   | 0.43250267 | 7.85E-10   | -0.7341185 | 1.37E-32 | -0.6752965 | 5.54E-26   |
| 3.16E-31   | -0.243233  | 0.00084948 | 0.6475201  | 2.28E-23 | 0.42682814 | 1.37E-09   |
| 1.59E-06   | -0.1713322 | 0.0197089  | 0.47022366 | 1.45E-11 | 0.39436853 | 2.79E-08   |
| 6.12E-31   | -0.2060334 | 0.00489878 | 0.61546201 | 1.14E-20 | 0.70589525 | 3.24E-29   |
| 2.44E-44   | 0.36972859 | 2.22E-07   | -0.7371621 | 5.59E-33 | -0.4889598 | 1.64E-12   |
| 1.76E-20   | -0.4474181 | 1.71E-10   | 0.78563106 | 5.17E-40 | 0.2710759  | 0.00018984 |
| 1.38E-43   | -0.4362194 | 5.41E-10   | 0.83184893 | 1.13E-48 | 0.49175534 | 1.18E-12   |
| 4.10E-22   | -0.3979687 | 2.03E-08   | 0.84048727 | 1.39E-50 | 0.5256022  | 1.57E-14   |
| 1.03E-48   | -0.4233249 | 1.93E-09   | 0.7374392  | 5.15E-33 | 0.29241975 | 5.37E-05   |
| 1.42E-51   | -0.5140546 | 7.22E-14   | 0.88302593 | 5.05E-62 | 0.41930943 | 2.84E-09   |

|            |            |            |            |          |            |            |
|------------|------------|------------|------------|----------|------------|------------|
| 1.74E-15   | 0.30105001 | 3.13E-05   | -0.6467033 | 2.70E-23 | -0.5698867 | 2.54E-17   |
| 8.90E-50   | -0.178431  | 0.0150985  | 0.81439272 | 4.06E-45 | 0.59457498 | 4.55E-19   |
| 7.41E-27   | 0.36392637 | 3.54E-07   | -0.4839297 | 2.99E-12 | -0.1375607 | 0.06186911 |
| 2.39E-34   | 0.57723911 | 7.93E-18   | -0.632684  | 4.44E-22 | -0.5031515 | 2.90E-13   |
| 1.72E-14   | -0.4489074 | 1.47E-10   | 0.62734154 | 1.24E-21 | 0.80161929 | 9.53E-43   |
| 2.79E-34   | 0.28786394 | 7.09E-05   | -0.6202184 | 4.76E-21 | -0.3174595 | 1.07E-05   |
| 0.01934994 | -0.3289417 | 4.84E-06   | 0.58003355 | 5.06E-18 | 0.50061868 | 3.97E-13   |
| 2.57E-50   | 0.35039397 | 1.01E-06   | -0.6908375 | 1.42E-27 | -0.5890735 | 1.15E-18   |
| 6.64E-24   | -0.279736  | 0.00011511 | 0.48344586 | 3.16E-12 | 0.2918645  | 5.55E-05   |
| 1.12E-14   | -0.4055807 | 1.02E-08   | 0.83674798 | 9.63E-50 | 0.50307901 | 2.92E-13   |
| 5.98E-54   | -0.5278345 | 1.16E-14   | 0.89735554 | 6.37E-67 | 0.66462668 | 6.04E-25   |
| 6.46E-13   | -0.3816372 | 8.33E-08   | 0.69642949 | 3.58E-28 | 0.60918279 | 3.56E-20   |
| 2.38E-07   | -0.3056804 | 2.32E-05   | 0.60069291 | 1.59E-19 | 0.37165211 | 1.90E-07   |
| 1.01E-30   | 0.3844239  | 6.58E-08   | -0.6568538 | 3.24E-24 | -0.6893446 | 2.04E-27   |
| 7.97E-11   | 0.51692002 | 4.97E-14   | -0.5463211 | 8.72E-16 | -0.0721343 | 0.32918598 |
| 5.22E-10   | -0.4471239 | 1.77E-10   | 0.67518771 | 5.68E-26 | 0.05550822 | 0.45298071 |
| 4.88E-40   | -0.2377615 | 0.00111866 | 0.6314135  | 5.68E-22 | 0.2447587  | 0.00078584 |
| 1.02E-27   | -0.454938  | 7.74E-11   | 0.70109975 | 1.11E-28 | 0.251968   | 0.00054037 |
| 4.19E-30   | -0.494663  | 8.26E-13   | 0.85824156 | 6.69E-55 | 0.6418804  | 7.19E-23   |
| 0.00840543 | -0.3793788 | 1.01E-07   | 0.57380157 | 1.37E-17 | 0.52006369 | 3.29E-14   |
| 3.33E-30   | -0.4624345 | 3.43E-11   | 0.82172534 | 1.46E-46 | 0.42298442 | 2.00E-09   |
| 4.77E-54   | 0.6068123  | 5.43E-20   | -0.8802096 | 3.89E-61 | -0.5877679 | 1.43E-18   |
| 2.25E-39   | 0.49821603 | 5.35E-13   | -0.7997697 | 2.03E-42 | -0.6816949 | 1.26E-26   |
| 2.48E-09   | -0.3486975 | 1.15E-06   | 0.68268395 | 9.98E-27 | 0.22020437 | 0.00259651 |
| 5.08E-24   | -0.4324373 | 7.90E-10   | 0.74694539 | 2.87E-34 | 0.28770549 | 7.16E-05   |
| 0.00028332 | -0.4467094 | 1.85E-10   | 0.64460911 | 4.14E-23 | 0.290608   | 6.00E-05   |
| 3.20E-09   | 0.33600068 | 2.93E-06   | -0.6411119 | 8.39E-23 | -0.7180805 | 1.27E-30   |
| 1.87E-21   | -0.488911  | 1.65E-12   | 0.89037009 | 1.89E-64 | 0.66444961 | 6.28E-25   |
| 1.14E-40   | -0.5540606 | 2.81E-16   | 0.94471208 | 1.50E-90 | 0.74957961 | 1.26E-34   |
| 5.09E-59   | -0.4560083 | 6.90E-11   | 0.79691265 | 6.45E-42 | 0.35695005 | 6.12E-07   |
| 1.72E-37   | -0.3859197 | 5.79E-08   | 0.83197208 | 1.07E-48 | 0.45775744 | 5.71E-11   |
| 3.69E-12   | -0.4822211 | 3.65E-12   | 0.66289459 | 8.82E-25 | 0.56225619 | 8.23E-17   |
| 6.93E-10   | 0.66474535 | 5.88E-25   | -0.7901667 | 9.17E-41 | -0.3896642 | 4.20E-08   |
| 1.55E-24   | -0.4745264 | 8.88E-12   | 0.89588244 | 2.19E-66 | 0.67919123 | 2.26E-26   |
| 1.35E-27   | -0.5567662 | 1.88E-16   | 0.90007216 | 6.22E-68 | 0.66940035 | 2.10E-25   |
| 4.47E-14   | 0.34728752 | 1.28E-06   | -0.6051412 | 7.30E-20 | -0.7166592 | 1.87E-30   |
| 6.17E-38   | -0.440007  | 3.69E-10   | 0.60785071 | 4.52E-20 | 0.16021093 | 0.02937435 |
| 6.17E-14   | -0.4162858 | 3.78E-09   | 0.61314692 | 1.74E-20 | 0.67138789 | 1.34E-25   |
| 0.04561201 | -0.2596763 | 0.0003577  | 0.52500708 | 1.70E-14 | 0.61828958 | 6.80E-21   |
| 9.77E-12   | 0.26111189 | 0.00033079 | -0.59232   | 6.66E-19 | -0.6334245 | 3.84E-22   |
| 2.43E-26   | -0.4324102 | 7.92E-10   | 0.80925664 | 3.83E-44 | 0.33474189 | 3.21E-06   |
| 5.46E-19   | -0.4484563 | 1.54E-10   | 0.82362997 | 5.98E-47 | 0.69294804 | 8.47E-28   |
| 2.07E-10   | 0.45099772 | 1.18E-10   | -0.6321154 | 4.96E-22 | -0.2371346 | 0.00115404 |
| 1.94E-21   | -0.4283391 | 1.18E-09   | 0.67310585 | 9.12E-26 | 0.12986266 | 0.07809981 |
| 7.81E-42   | 0.5891776  | 1.13E-18   | -0.620919  | 4.17E-21 | -0.3759111 | 1.34E-07   |
| 3.93E-36   | 0.33089112 | 4.22E-06   | -0.7450312 | 5.18E-34 | -0.5137712 | 7.49E-14   |

|            |            |            |            |          |            |            |
|------------|------------|------------|------------|----------|------------|------------|
| 1.50E-12   | 0.2068444  | 0.00472902 | -0.6503406 | 1.27E-23 | 0.00721857 | 0.92231424 |
| 1.52E-28   | -0.654891  | 4.91E-24   | 0.87444884 | 2.18E-59 | 0.51672196 | 5.10E-14   |
| 1.11E-24   | 0.52402907 | 1.94E-14   | -0.7151162 | 2.84E-30 | -0.6972749 | 2.90E-28   |
| 1.87E-15   | -0.4016869 | 1.45E-08   | 0.78345774 | 1.17E-39 | 0.67585713 | 4.87E-26   |
| 8.30E-28   | -0.5451065 | 1.04E-15   | 0.91333715 | 2.54E-73 | 0.77053868 | 1.23E-37   |
| 5.29E-25   | -0.5411333 | 1.83E-15   | 0.83978663 | 2.00E-50 | 0.55959    | 1.23E-16   |
| 1.89E-05   | -0.4737098 | 9.74E-12   | 0.58140082 | 4.06E-18 | 0.50891068 | 1.40E-13   |
| 6.54E-33   | -0.4741403 | 9.28E-12   | 0.91873484 | 9.09E-76 | 0.58157352 | 3.94E-18   |
| 2.67E-18   | -0.4696537 | 1.54E-11   | 0.82913108 | 4.31E-48 | 0.61353058 | 1.63E-20   |
| 3.26E-08   | -0.3628208 | 3.87E-07   | 0.52796814 | 1.14E-14 | 0.7400548  | 2.36E-33   |
| 3.86E-10   | 0.12452952 | 0.0912415  | -0.5489538 | 5.96E-16 | -0.5539547 | 2.86E-16   |
| 2.72E-36   | 0.201427   | 0.00597096 | -0.5795722 | 5.45E-18 | -0.386272  | 5.62E-08   |
| 5.58E-31   | -0.5086532 | 1.45E-13   | 0.86327063 | 3.12E-56 | 0.53824127 | 2.76E-15   |
| 2.38E-25   | 0.24553398 | 0.00075522 | -0.6841757 | 7.02E-27 | -0.2858266 | 8.02E-05   |
| 6.99E-09   | 0.20457957 | 0.00521687 | -0.4575019 | 5.87E-11 | -0.2029066 | 0.00560568 |
| 1.84E-11   | -0.4409681 | 3.34E-10   | 0.79766861 | 4.76E-42 | 0.60378518 | 9.26E-20   |
| 8.05E-22   | 0.39034679 | 3.96E-08   | -0.894928  | 4.83E-66 | -0.477202  | 6.53E-12   |
| 2.26E-22   | -0.506286  | 1.95E-13   | 0.74732502 | 2.55E-34 | 0.20984584 | 0.0041457  |
| 1.15E-33   | 0.29943775 | 3.46E-05   | -0.5895603 | 1.06E-18 | -0.3274517 | 5.37E-06   |
| 6.49E-10   | -0.5331343 | 5.61E-15   | 0.77605698 | 1.74E-38 | 0.56720366 | 3.85E-17   |
| 2.35E-11   | -0.3205657 | 8.64E-06   | 0.78176578 | 2.19E-39 | 0.68293941 | 9.39E-27   |
| 3.38E-30   | -0.4312225 | 8.91E-10   | 0.74134949 | 1.59E-33 | 0.35743374 | 5.89E-07   |
| 9.09E-27   | -0.4842348 | 2.88E-12   | 0.86661269 | 3.81E-57 | 0.7259726  | 1.43E-31   |
| 6.50E-41   | -0.4262091 | 1.46E-09   | 0.68000283 | 1.87E-26 | 0.32644703 | 5.76E-06   |
| 3.01E-24   | -0.4932599 | 9.80E-13   | 0.7899186  | 1.01E-40 | 0.36144758 | 4.31E-07   |
| 2.64E-33   | 0.78618389 | 4.20E-40   | -0.8196195 | 3.85E-46 | -0.6768705 | 3.86E-26   |
| 2.62E-09   | -0.3746391 | 1.49E-07   | 0.7226494  | 3.62E-31 | 0.57143369 | 1.99E-17   |
| 0.00023026 | -0.3457672 | 1.43E-06   | 0.37839197 | 1.09E-07 | 0.0114158  | 0.87743291 |
| 3.58E-15   | 0.35783715 | 5.71E-07   | -0.6388007 | 1.33E-22 | -0.7671571 | 3.94E-37   |
| 6.87E-50   | -0.4034154 | 1.24E-08   | 0.70419992 | 5.02E-29 | 0.3030268  | 2.76E-05   |
| 1.82E-14   | 0.34905735 | 1.12E-06   | -0.5716153 | 1.94E-17 | -0.6946944 | 5.51E-28   |
| 3.43E-67   | 0.52527005 | 1.64E-14   | -0.8417974 | 6.94E-51 | -0.4643391 | 2.78E-11   |
| 0.01309763 | -0.2469326 | 0.00070273 | 0.58694213 | 1.63E-18 | 0.4636915  | 2.99E-11   |
| 4.21E-29   | -0.4121308 | 5.58E-09   | 0.74468692 | 5.76E-34 | 0.78478365 | 7.11E-40   |
| 1.13E-17   | 0.70450995 | 4.63E-29   | -0.8079241 | 6.78E-44 | -0.3536214 | 7.91E-07   |
| 1.86E-08   | -0.3122426 | 1.51E-05   | 0.39313164 | 3.10E-08 | -0.1536085 | 0.03683873 |
| 1.22E-47   | -0.4336357 | 7.01E-10   | 0.70562132 | 3.48E-29 | 0.47836194 | 5.71E-12   |
| 1.10E-40   | 0.51537031 | 6.08E-14   | -0.8089762 | 4.32E-44 | -0.713593  | 4.28E-30   |
| 0.0012082  | -0.1600632 | 0.02952601 | 0.41990657 | 2.68E-09 | 0.39523401 | 2.58E-08   |
| 1.37E-06   | -0.2874253 | 7.28E-05   | 0.6597204  | 1.75E-24 | 0.38199206 | 8.08E-08   |
| 2.48E-17   | 0.41067757 | 6.39E-09   | -0.6547692 | 5.04E-24 | -0.5075332 | 1.67E-13   |
| 7.90E-15   | 0.31911937 | 9.54E-06   | -0.5269355 | 1.31E-14 | -0.3403325 | 2.14E-06   |
| 9.78E-66   | -0.405769  | 1.00E-08   | 0.79512059 | 1.32E-41 | 0.38587191 | 5.81E-08   |
| 9.01E-24   | 0.30590569 | 2.29E-05   | -0.6407312 | 9.06E-23 | -0.1744424 | 0.01755709 |
| 2.49E-09   | 0.45207545 | 1.05E-10   | -0.7261747 | 1.35E-31 | -0.5038743 | 2.65E-13   |
| 4.95E-19   | 0.4853877  | 2.51E-12   | -0.72567   | 1.55E-31 | -0.2152488 | 0.0032565  |



|            |            |            |            |          |            |            |
|------------|------------|------------|------------|----------|------------|------------|
| 2.60E-28   | 0.50817537 | 1.54E-13   | -0.6214402 | 3.79E-21 | -0.7418757 | 1.36E-33   |
| 1.08E-11   | 0.55902069 | 1.34E-16   | -0.6313092 | 5.80E-22 | -0.5312203 | 7.31E-15   |
| 1.16E-36   | 0.51557181 | 5.93E-14   | -0.8092179 | 3.89E-44 | -0.6321686 | 4.91E-22   |
| 4.64E-07   | -0.3214983 | 8.11E-06   | 0.29025073 | 6.13E-05 | -0.2206533 | 0.00254317 |
| 2.95E-22   | 0.34677472 | 1.33E-06   | -0.6086301 | 3.93E-20 | -0.217449  | 0.00294674 |
| 9.89E-05   | 0.21460167 | 0.00335306 | -0.415823  | 3.95E-09 | -0.5673346 | 3.77E-17   |
| 0.00960836 | 0.47025523 | 1.44E-11   | -0.4896327 | 1.52E-12 | -0.4528376 | 9.68E-11   |
| 2.46E-15   | -0.4721339 | 1.16E-11   | 0.86386308 | 2.16E-56 | 0.65675145 | 3.31E-24   |
| 0.08651885 | -0.2635547 | 0.00028926 | 0.41868222 | 3.01E-09 | 0.58614298 | 1.87E-18   |
| 9.84E-39   | -0.5415324 | 1.73E-15   | 0.9550095  | 1.55E-98 | 0.72479344 | 1.99E-31   |
| 3.37E-63   | -0.5706116 | 2.27E-17   | 0.91481632 | 5.63E-74 | 0.52127314 | 2.80E-14   |
| 1.13E-16   | 0.26072338 | 0.00033788 | -0.4617673 | 3.69E-11 | 0.08701491 | 0.2388986  |
| 5.13E-15   | 0.36530624 | 3.17E-07   | -0.6897948 | 1.83E-27 | -0.4705885 | 1.39E-11   |
| 1.14E-05   | -0.255604  | 0.00044552 | 0.58762793 | 1.46E-18 | 0.10343458 | 0.16118783 |
| 1.37E-18   | -0.4914772 | 1.22E-12   | 0.86074624 | 1.48E-55 | 0.37318729 | 1.68E-07   |
| 1.34E-44   | 0.39923164 | 1.81E-08   | -0.7478033 | 2.20E-34 | -0.2714246 | 0.00018611 |
| 1.25E-08   | 0.72868002 | 6.61E-32   | -0.5288903 | 1.00E-14 | -0.6007425 | 1.58E-19   |
| 0.00025535 | 0.18169974 | 0.01331345 | -0.411373  | 5.99E-09 | -0.3883149 | 4.72E-08   |
| 9.61E-42   | 0.37354879 | 1.63E-07   | -0.6544478 | 5.39E-24 | -0.3992563 | 1.81E-08   |
| 2.32E-20   | 0.39188812 | 3.46E-08   | -0.5495079 | 5.50E-16 | -0.2606179 | 0.00033983 |
| 1.69E-08   | 0.43274749 | 7.66E-10   | -0.7772117 | 1.15E-38 | -0.3120155 | 1.54E-05   |
| 3.32E-35   | 0.66490917 | 5.68E-25   | -0.9412353 | 3.38E-88 | -0.5875858 | 1.47E-18   |
| 9.99E-21   | 0.58542354 | 2.10E-18   | -0.752869  | 4.44E-35 | -0.2715516 | 0.00018477 |
| 3.06E-07   | 0.10596146 | 0.15114246 | -0.2828418 | 9.58E-05 | 0.19514625 | 0.00776946 |
| 1.03E-26   | -0.193478  | 0.00832172 | 0.56999405 | 2.50E-17 | 0.0307906  | 0.67736791 |
| 0.01849353 | -0.391935  | 3.45E-08   | 0.5938774  | 5.12E-19 | 0.5140501  | 7.22E-14   |
| 1.95E-23   | -0.5760586 | 9.58E-18   | 0.89783526 | 4.25E-67 | 0.68423622 | 6.92E-27   |
| 1.22E-22   | -0.3799024 | 9.63E-08   | 0.78130862 | 2.59E-39 | 0.44915735 | 1.43E-10   |
| 4.28E-05   | 0.17190299 | 0.01929767 | -0.4334325 | 7.16E-10 | -0.6237925 | 2.44E-21   |
| 1.54E-15   | -0.4631374 | 3.18E-11   | 0.79036812 | 8.48E-41 | 0.72432435 | 2.27E-31   |
| 5.25E-15   | 0.71267313 | 5.47E-30   | -0.7209037 | 5.87E-31 | -0.6805618 | 1.64E-26   |
| 0.01471305 | 0.238692   | 0.00106796 | -0.4566382 | 6.45E-11 | -0.5614141 | 9.35E-17   |
| 4.60E-30   | 0.41423252 | 4.59E-09   | -0.885519  | 7.91E-63 | -0.6696848 | 1.97E-25   |
| 3.54E-19   | 0.36729002 | 2.71E-07   | -0.8125593 | 9.12E-45 | -0.4533312 | 9.19E-11   |
| 0.00274422 | 0.50526852 | 2.22E-13   | -0.6826243 | 1.01E-26 | -0.180548  | 0.01392007 |
| 9.76E-06   | -0.3934369 | 3.02E-08   | 0.65872763 | 2.17E-24 | 0.21836126 | 0.00282632 |
| 6.58E-26   | 0.44221486 | 2.94E-10   | -0.7677011 | 3.27E-37 | -0.5465193 | 8.48E-16   |
| 6.92E-14   | -0.4192899 | 2.84E-09   | 0.79967151 | 2.12E-42 | 0.67412266 | 7.24E-26   |
| 4.14E-13   | -0.4996937 | 4.46E-13   | 0.77121428 | 9.68E-38 | 0.75631745 | 1.46E-35   |
| 3.81E-09   | -0.4374241 | 4.79E-10   | 0.73132339 | 3.09E-32 | 0.40678341 | 9.15E-09   |
| 0.00019572 | 0.26692983 | 0.00023981 | -0.434335  | 6.54E-10 | -0.6534594 | 6.64E-24   |
| 4.29E-25   | 0.48704038 | 2.07E-12   | -0.727593  | 9.01E-32 | -0.6758367 | 4.89E-26   |
| 4.14E-16   | 0.37821562 | 1.11E-07   | -0.6662343 | 4.24E-25 | -0.7385463 | 3.70E-33   |
| 4.52E-20   | 0.45064849 | 1.22E-10   | -0.7572668 | 1.07E-35 | -0.4851944 | 2.57E-12   |
| 1.93E-08   | -0.5464823 | 8.52E-16   | 0.65419701 | 5.69E-24 | 0.60325802 | 1.02E-19   |
| 8.84E-09   | 0.26032858 | 0.00034523 | -0.6169426 | 8.72E-21 | -0.4432941 | 2.63E-10   |

|          |            |            |            |          |            |            |
|----------|------------|------------|------------|----------|------------|------------|
| 4.76E-06 | 0.28808064 | 7.00E-05   | -0.5538689 | 2.90E-16 | -0.5022318 | 3.25E-13   |
| 3.80E-11 | 0.5943912  | 4.69E-19   | -0.601647  | 1.35E-19 | -0.3766431 | 1.26E-07   |
| 6.65E-18 | 0.4285243  | 1.16E-09   | -0.6346794 | 3.01E-22 | -0.4985916 | 5.11E-13   |
| 4.27E-10 | -0.481752  | 3.85E-12   | 0.61638257 | 9.66E-21 | 0.26041273 | 0.00034365 |
| 1.89E-19 | -0.4159458 | 3.91E-09   | 0.75843194 | 7.34E-36 | 0.53244679 | 6.17E-15   |
| 4.35E-82 | -0.4812822 | 4.07E-12   | 0.9022328  | 9.32E-69 | 0.6588911  | 2.10E-24   |
| 6.15E-42 | -0.4403713 | 3.55E-10   | 0.89796476 | 3.80E-67 | 0.75718175 | 1.10E-35   |
| 5.71E-22 | -0.4702697 | 1.44E-11   | 0.83964846 | 2.15E-50 | 0.6679248  | 2.92E-25   |
| 4.30E-25 | 0.73268871 | 2.08E-32   | -0.7267552 | 1.14E-31 | -0.4283689 | 1.18E-09   |
| 9.16E-32 | 0.30365608 | 2.65E-05   | -0.6013357 | 1.42E-19 | -0.388422  | 4.67E-08   |
| 1.50E-57 | -0.5328947 | 5.80E-15   | 0.89615437 | 1.75E-66 | 0.52751049 | 1.21E-14   |
| 2.11E-25 | -0.4139551 | 4.71E-09   | 0.6979844  | 2.43E-28 | 0.76021436 | 4.08E-36   |
| 1.11E-27 | -0.2362414 | 0.00120624 | 0.48381127 | 3.03E-12 | 0.02812613 | 0.70391645 |
| 4.63E-26 | -0.2784107 | 0.00012441 | 0.59647279 | 3.29E-19 | 0.17739787 | 0.01570458 |
| 1.50E-28 | -0.1396323 | 0.05800909 | 0.65798011 | 2.55E-24 | 0.12639235 | 0.08646414 |
| 1.68E-05 | -0.3077781 | 2.03E-05   | 0.56189404 | 8.69E-17 | -0.0680125 | 0.35764285 |
| 2.49E-30 | -0.3218669 | 7.91E-06   | 0.6923181  | 9.88E-28 | 0.33107505 | 4.16E-06   |
| 3.30E-51 | 0.49035958 | 1.39E-12   | -0.9307699 | 6.80E-82 | -0.6887595 | 2.35E-27   |
| 1.52E-09 | 0.57312661 | 1.53E-17   | -0.6150731 | 1.23E-20 | -0.0574817 | 0.43705266 |
| 2.96E-46 | -0.5312354 | 7.29E-15   | 0.70797075 | 1.89E-29 | 0.35732986 | 5.94E-07   |
| 8.17E-25 | 0.65375776 | 6.24E-24   | -0.7314056 | 3.02E-32 | -0.5591462 | 1.32E-16   |
| 6.34E-05 | 0.31537557 | 1.23E-05   | -0.5817924 | 3.81E-18 | -0.2673507 | 0.00023423 |
| 3.03E-06 | -0.4016966 | 1.45E-08   | 0.52621628 | 1.44E-14 | -0.0253747 | 0.7317121  |
| 5.20E-17 | -0.4219942 | 2.20E-09   | 0.80708741 | 9.68E-44 | 0.46358283 | 3.03E-11   |
| 1.92E-28 | 0.38317459 | 7.31E-08   | -0.6171619 | 8.37E-21 | -0.4530258 | 9.49E-11   |
| 7.67E-46 | -0.5425466 | 1.50E-15   | 0.88177687 | 1.26E-61 | 0.46819933 | 1.81E-11   |
| 7.72E-06 | 0.71662467 | 1.89E-30   | -0.5591627 | 1.31E-16 | -0.358279  | 5.52E-07   |
| 3.91E-05 | 0.36688401 | 2.80E-07   | -0.5367982 | 3.37E-15 | -0.3251988 | 6.28E-06   |
| 1.30E-26 | -0.2962649 | 4.23E-05   | 0.57824512 | 6.75E-18 | 0.09974754 | 0.17673095 |
| 4.32E-64 | 0.52324989 | 2.15E-14   | -0.7789478 | 6.14E-39 | -0.4879671 | 1.85E-12   |
| 7.02E-21 | 0.63515564 | 2.74E-22   | -0.7454223 | 4.60E-34 | -0.7480787 | 2.02E-34   |
| 1.67E-19 | -0.4375402 | 4.73E-10   | 0.7363892  | 7.03E-33 | 0.89842704 | 2.57E-67   |
| 4.74E-22 | 0.3833681  | 7.19E-08   | -0.7606656 | 3.51E-36 | -0.6568623 | 3.23E-24   |
| 1.47E-26 | 0.52157874 | 2.69E-14   | -0.8193784 | 4.29E-46 | -0.6165074 | 9.44E-21   |
| 5.03E-38 | 0.70559882 | 3.50E-29   | -0.8758023 | 8.61E-60 | -0.6333801 | 3.87E-22   |
| 1.73E-44 | -0.5791612 | 5.83E-18   | 0.93086144 | 6.05E-82 | 0.64158095 | 7.64E-23   |
| 3.04E-11 | 0.43489741 | 6.18E-10   | -0.5332886 | 5.49E-15 | -0.6373146 | 1.79E-22   |
| 2.72E-25 | 0.50501578 | 2.29E-13   | -0.7387828 | 3.45E-33 | -0.8376426 | 6.08E-50   |
| 3.27E-19 | 0.61935466 | 5.58E-21   | -0.6381119 | 1.53E-22 | -0.7345196 | 1.22E-32   |
| 1.38E-06 | 0.49431721 | 8.62E-13   | -0.6010933 | 1.48E-19 | -0.502527  | 3.13E-13   |
| 1.39E-44 | -0.3954464 | 2.53E-08   | 0.91233465 | 6.94E-73 | 0.64167182 | 7.50E-23   |
| 2.76E-14 | 0.34298105 | 1.76E-06   | -0.6263545 | 1.50E-21 | -0.708914  | 1.48E-29   |
| 1.45E-12 | 0.41627927 | 3.79E-09   | -0.7151065 | 2.85E-30 | -0.4502839 | 1.27E-10   |
| 8.89E-16 | -0.3062268 | 2.24E-05   | 0.79345815 | 2.54E-41 | 0.44025426 | 3.59E-10   |
| 2.52E-33 | -0.5536516 | 2.99E-16   | 0.86766979 | 1.94E-57 | 0.51297077 | 8.31E-14   |
| 2.68E-68 | -0.5883703 | 1.29E-18   | 0.92216535 | 2.06E-77 | 0.78434915 | 8.37E-40   |

|            |            |            |            |          |            |            |
|------------|------------|------------|------------|----------|------------|------------|
| 1.94E-26   | 0.48273794 | 3.43E-12   | -0.6932736 | 7.82E-28 | -0.4666465 | 2.16E-11   |
| 4.77E-20   | -0.5856065 | 2.04E-18   | 0.80623263 | 1.39E-43 | 0.26684808 | 0.00024091 |
| 3.33E-49   | 0.54355747 | 1.30E-15   | -0.6342227 | 3.29E-22 | -0.5822652 | 3.52E-18   |
| 5.37E-23   | 0.47155175 | 1.24E-11   | -0.7029185 | 6.97E-29 | -0.47916   | 5.21E-12   |
| 2.20E-11   | -0.4913231 | 1.24E-12   | 0.78410811 | 9.16E-40 | 0.46997966 | 1.49E-11   |
| 1.31E-21   | -0.4208344 | 2.45E-09   | 0.71800026 | 1.30E-30 | 0.27751402 | 0.00013109 |
| 7.96E-05   | 0.23608008 | 0.00121589 | -0.3987801 | 1.89E-08 | -0.0825182 | 0.26413668 |
| 6.01E-08   | -0.4816774 | 3.89E-12   | 0.60105696 | 1.49E-19 | 0.39588648 | 2.44E-08   |
| 9.61E-35   | -0.4050846 | 1.07E-08   | 0.74518738 | 4.94E-34 | 0.6910656  | 1.34E-27   |
| 2.36E-11   | -0.5050873 | 2.27E-13   | 0.80872743 | 4.81E-44 | 0.52924052 | 9.58E-15   |
| 8.52E-18   | 0.27410098 | 0.0001597  | -0.5304162 | 8.16E-15 | -0.5726186 | 1.65E-17   |
| 5.92E-29   | -0.642433  | 6.43E-23   | 0.83022607 | 2.52E-48 | 0.56481126 | 5.57E-17   |
| 2.98E-28   | -0.5462071 | 8.87E-16   | 0.88824181 | 9.95E-64 | 0.62370657 | 2.48E-21   |
| 8.71E-15   | -0.5197452 | 3.43E-14   | 0.83037664 | 2.35E-48 | 0.71934776 | 9.00E-31   |
| 5.33E-20   | -0.411905  | 5.70E-09   | 0.83061193 | 2.09E-48 | 0.25842369 | 0.00038284 |
| 9.38E-59   | -0.5710403 | 2.12E-17   | 0.87440321 | 2.24E-59 | 0.48556809 | 2.46E-12   |
| 3.39E-40   | -0.4600178 | 4.47E-11   | 0.80282005 | 5.80E-43 | 0.45039286 | 1.25E-10   |
| 4.99E-28   | 0.51085227 | 1.09E-13   | -0.8835717 | 3.38E-62 | -0.7386267 | 3.61E-33   |
| 5.20E-21   | -0.525005  | 1.70E-14   | 0.80105575 | 1.20E-42 | 0.51418875 | 7.09E-14   |
| 1.71E-32   | 0.40277388 | 1.32E-08   | -0.7834327 | 1.18E-39 | -0.7808784 | 3.03E-39   |
| 4.11E-18   | 0.07422896 | 0.31529861 | -0.3879068 | 4.88E-08 | -0.1026448 | 0.16442799 |
| 3.55E-36   | -0.553207  | 3.19E-16   | 0.84101607 | 1.05E-50 | 0.33454829 | 3.25E-06   |
| 0.00053932 | -0.1981502 | 0.00685662 | 0.59557247 | 3.84E-19 | 0.50170955 | 3.47E-13   |
| 2.12E-22   | -0.410045  | 6.78E-09   | 0.68463344 | 6.29E-27 | 0.2378943  | 0.00111129 |
| 6.31E-44   | 0.49104966 | 1.28E-12   | -0.8106811 | 2.07E-44 | -0.369656  | 2.24E-07   |
| 1.98E-36   | -0.3965422 | 2.30E-08   | 0.8564187  | 1.97E-54 | 0.5171176  | 4.84E-14   |
| 6.51E-55   | -0.3725911 | 1.76E-07   | 0.80291366 | 5.58E-43 | 0.41870012 | 3.01E-09   |
| 1.24E-38   | -0.4299611 | 1.01E-09   | 0.83922542 | 2.68E-50 | 0.62599655 | 1.61E-21   |
| 6.87E-27   | -0.3981594 | 1.99E-08   | 0.73079885 | 3.60E-32 | 0.12078611 | 0.10147693 |
| 2.01E-13   | -0.3923941 | 3.31E-08   | 0.72813526 | 7.72E-32 | 0.64050914 | 9.47E-23   |
| 1.44E-13   | 0.42848266 | 1.17E-09   | -0.6243505 | 2.19E-21 | 0.04164098 | 0.57358201 |
| 6.68E-19   | -0.4989627 | 4.88E-13   | 0.86146997 | 9.49E-56 | 0.47735465 | 6.42E-12   |
| 6.05E-25   | -0.5166989 | 5.12E-14   | 0.89544299 | 3.15E-66 | 0.68849023 | 2.50E-27   |
| 0.00406717 | -0.3763119 | 1.30E-07   | 0.45307108 | 9.45E-11 | 0.52066775 | 3.03E-14   |
| 1.57E-33   | -0.4381188 | 4.47E-10   | 0.69303423 | 8.29E-28 | 0.15244902 | 0.03830265 |
| 3.76E-24   | -0.5261117 | 1.46E-14   | 0.9275616  | 3.70E-80 | 0.62759622 | 1.18E-21   |
| 1.19E-36   | -0.5050074 | 2.29E-13   | 0.93523434 | 1.88E-84 | 0.71895091 | 1.00E-30   |
| 1.15E-20   | 0.45866521 | 5.18E-11   | -0.606319  | 5.93E-20 | -0.6502846 | 1.29E-23   |
| 4.39E-16   | 0.60503535 | 7.44E-20   | -0.7344656 | 1.24E-32 | -0.3229546 | 7.34E-06   |
| 8.42E-29   | -0.3528314 | 8.40E-07   | 0.50974019 | 1.26E-13 | 0.28025938 | 0.00011163 |
| 6.61E-19   | -0.4393094 | 3.96E-10   | 0.77844322 | 7.38E-39 | 0.34242039 | 1.83E-06   |
| 1.21E-56   | -0.5431772 | 1.37E-15   | 0.86077029 | 1.45E-55 | 0.63916601 | 1.24E-22   |
| 4.65E-31   | -0.6355456 | 2.54E-22   | 0.89490989 | 4.90E-66 | 0.68833359 | 2.60E-27   |
| 2.99E-30   | -0.5996033 | 1.92E-19   | 0.90069822 | 3.61E-68 | 0.59664907 | 3.19E-19   |
| 1.37E-12   | -0.6054596 | 6.90E-20   | 0.76880522 | 2.24E-37 | 0.65729962 | 2.95E-24   |
| 6.68E-07   | 0.12137322 | 0.09981419 | -0.3992878 | 1.80E-08 | -0.6818004 | 1.23E-26   |

|            |            |            |            |          |            |            |
|------------|------------|------------|------------|----------|------------|------------|
| 4.57E-42   | -0.2863456 | 7.77E-05   | 0.66059572 | 1.45E-24 | 0.41156879 | 5.88E-09   |
| 1.92E-27   | -0.2005675 | 0.00619277 | 0.52734533 | 1.24E-14 | 0.14147479 | 0.05474487 |
| 1.39E-05   | 0.34249687 | 1.82E-06   | -0.698013  | 2.41E-28 | -0.2161854 | 0.00312122 |
| 5.79E-09   | 0.32660783 | 5.70E-06   | -0.7398055 | 2.54E-33 | -0.4043832 | 1.14E-08   |
| 2.55E-43   | 0.43879908 | 4.17E-10   | -0.8171588 | 1.18E-45 | -0.7093073 | 1.33E-29   |
| 8.95E-05   | 0.27892968 | 0.00012069 | -0.6037232 | 9.36E-20 | -0.3731623 | 1.68E-07   |
| 0.00424014 | 0.30835847 | 1.95E-05   | -0.490202  | 1.42E-12 | -0.6143577 | 1.40E-20   |
| 0.08950916 | 0.39255559 | 3.26E-08   | -0.3723891 | 1.79E-07 | -0.6855307 | 5.09E-27   |
| 4.87E-31   | 0.42440759 | 1.74E-09   | -0.7203424 | 6.85E-31 | -0.7221743 | 4.13E-31   |
| 4.67E-25   | 0.55712042 | 1.79E-16   | -0.7535109 | 3.62E-35 | -0.530264  | 8.33E-15   |
| 5.18E-25   | -0.5705626 | 2.28E-17   | 0.87234258 | 9.02E-59 | 0.75516458 | 2.13E-35   |
| 1.01E-19   | -0.4881281 | 1.82E-12   | 0.84210565 | 5.90E-51 | 0.6171149  | 8.44E-21   |
| 4.04E-33   | 0.52639248 | 1.41E-14   | -0.7780463 | 8.52E-39 | -0.6795516 | 2.08E-26   |
| 1.73E-14   | 0.63316752 | 4.04E-22   | -0.7752035 | 2.37E-38 | -0.3734673 | 1.64E-07   |
| 0.00015938 | -0.2925409 | 5.33E-05   | 0.53719532 | 3.19E-15 | 0.09165622 | 0.21467103 |
| 1.59E-22   | 0.32623095 | 5.85E-06   | -0.4869991 | 2.08E-12 | -0.6986143 | 2.07E-28   |
| 4.34E-19   | 0.32494842 | 6.39E-06   | -0.5983106 | 2.40E-19 | -0.6234661 | 2.59E-21   |
| 5.64E-25   | -0.2963898 | 4.20E-05   | 0.67497505 | 5.96E-26 | 0.09655463 | 0.19106309 |
| 1.22E-22   | 0.70926353 | 1.35E-29   | -0.738369  | 3.90E-33 | -0.5182771 | 4.16E-14   |
| 6.86E-14   | 0.68690381 | 3.66E-27   | -0.5744933 | 1.23E-17 | -0.4550262 | 7.67E-11   |
| 2.89E-22   | -0.5856743 | 2.02E-18   | 0.88544952 | 8.34E-63 | 0.60514715 | 7.29E-20   |
| 2.61E-31   | 0.26072011 | 0.00033794 | -0.7974689 | 5.16E-42 | -0.3962897 | 2.35E-08   |
| 4.34E-23   | 0.39647029 | 2.31E-08   | -0.8214524 | 1.65E-46 | -0.6527692 | 7.68E-24   |
| 1.38E-33   | -0.5255442 | 1.58E-14   | 0.93656003 | 3.00E-85 | 0.6917191  | 1.14E-27   |
| 5.13E-11   | 0.37034884 | 2.12E-07   | -0.7730083 | 5.16E-38 | -0.2535944 | 0.00049585 |
| 9.03E-36   | -0.5411173 | 1.84E-15   | 0.91678325 | 7.28E-75 | 0.81713805 | 1.19E-45   |
| 1.83E-64   | -0.4248988 | 1.66E-09   | 0.78666965 | 3.49E-40 | 0.35160287 | 9.22E-07   |
| 6.25E-23   | -0.5727952 | 1.61E-17   | 0.834258   | 3.41E-49 | 0.60644453 | 5.80E-20   |
| 2.58E-53   | -0.4909547 | 1.29E-12   | 0.91321158 | 2.88E-73 | 0.57430802 | 1.27E-17   |
| 1.68E-27   | 0.5145053  | 6.81E-14   | -0.6526361 | 7.90E-24 | -0.2064829 | 0.00480404 |
| 7.24E-26   | 0.55621572 | 2.04E-16   | -0.8254636 | 2.52E-47 | -0.4035725 | 1.23E-08   |
| 3.25E-26   | 0.27567323 | 0.00014586 | -0.7363949 | 7.02E-33 | -0.615829  | 1.07E-20   |
| 0.00033063 | -0.4818475 | 3.81E-12   | 0.58538214 | 2.12E-18 | 0.59498449 | 4.24E-19   |
| 1.44E-11   | 0.26759598 | 0.00023104 | -0.505557  | 2.14E-13 | 0.04161354 | 0.57383483 |
| 9.96E-26   | -0.510744  | 1.11E-13   | 0.86339657 | 2.89E-56 | 0.79179229 | 4.88E-41   |
| 3.82E-18   | -0.4770293 | 6.66E-12   | 0.77674586 | 1.36E-38 | 0.80374969 | 3.94E-43   |
| 0.64377015 | 0.25715056 | 0.00041005 | -0.3733454 | 1.66E-07 | -0.2481188 | 0.00066088 |
| 1.76E-44   | 0.45792023 | 5.61E-11   | -0.7954765 | 1.14E-41 | -0.3956193 | 2.50E-08   |
| 7.15E-41   | -0.5481105 | 6.73E-16   | 0.94186795 | 1.29E-88 | 0.54758095 | 7.27E-16   |
| 7.38E-33   | -0.5485708 | 6.30E-16   | 0.87239239 | 8.72E-59 | 0.43612134 | 5.46E-10   |
| 1.16E-07   | -0.3419239 | 1.90E-06   | 0.60211242 | 1.24E-19 | -0.0521304 | 0.48098265 |
| 6.72E-06   | 0.32779015 | 5.25E-06   | -0.5312276 | 7.30E-15 | -0.3188878 | 9.69E-06   |
| 1.96E-43   | 0.30439939 | 2.52E-05   | -0.7381403 | 4.18E-33 | -0.5021639 | 3.28E-13   |
| 5.61E-32   | -0.4538912 | 8.65E-11   | 0.77959467 | 4.85E-39 | 0.39812823 | 2.00E-08   |
| 5.05E-10   | -0.2794655 | 0.00011696 | 0.3828426  | 7.52E-08 | -0.2075865 | 0.00457833 |
| 5.25E-08   | 0.42884569 | 1.13E-09   | -0.5919708 | 7.06E-19 | 0.03047559 | 0.68048679 |

|            |            |            |            |          |            |            |
|------------|------------|------------|------------|----------|------------|------------|
| 4.22E-18   | -0.3619686 | 4.13E-07   | 0.74726485 | 2.60E-34 | 0.55226337 | 3.67E-16   |
| 2.64E-34   | -0.5630963 | 7.24E-17   | 0.94439636 | 2.49E-90 | 0.68549131 | 5.13E-27   |
| 6.63E-08   | 0.27926724 | 0.00011832 | -0.3475293 | 1.25E-06 | 0.18105963 | 0.01364768 |
| 1.41E-26   | 0.33307275 | 3.61E-06   | -0.7401356 | 2.30E-33 | -0.4691991 | 1.62E-11   |
| 2.77E-17   | -0.419056  | 2.91E-09   | 0.81267506 | 8.67E-45 | 0.73244238 | 2.24E-32   |
| 5.66E-15   | -0.3068779 | 2.15E-05   | 0.70308335 | 6.68E-29 | 0.53117744 | 7.35E-15   |
| 1.39E-22   | -0.5046428 | 2.40E-13   | 0.85377841 | 9.20E-54 | 0.52933826 | 9.45E-15   |
| 8.93E-13   | -0.360944  | 4.48E-07   | 0.70625419 | 2.95E-29 | 0.51368221 | 7.58E-14   |
| 1.30E-45   | -0.5720062 | 1.82E-17   | 0.9070785  | 1.12E-70 | 0.68165808 | 1.27E-26   |
| 3.70E-18   | 0.38512943 | 6.19E-08   | -0.6176134 | 7.70E-21 | -0.3470402 | 1.30E-06   |
| 1.36E-20   | -0.5566707 | 1.91E-16   | 0.86395946 | 2.03E-56 | 0.74316348 | 9.19E-34   |
| 3.21E-51   | -0.5619189 | 8.66E-17   | 0.94484    | 1.22E-90 | 0.68236964 | 1.07E-26   |
| 7.44E-46   | -0.2392537 | 0.00103839 | 0.73777155 | 4.66E-33 | 0.3847119  | 6.42E-08   |
| 7.90E-06   | 0.63290118 | 4.25E-22   | -0.5966426 | 3.19E-19 | -0.3366725 | 2.79E-06   |
| 2.90E-15   | 0.71496224 | 2.96E-30   | -0.7151279 | 2.83E-30 | -0.4559927 | 6.91E-11   |
| 1.70E-11   | 0.63424815 | 3.27E-22   | -0.7318063 | 2.69E-32 | -0.5125405 | 8.78E-14   |
| 0.05459455 | -0.3306281 | 4.30E-06   | 0.28826279 | 6.92E-05 | 0.1299181  | 0.07797168 |
| 1.22E-35   | -0.5814366 | 4.03E-18   | 0.9322995  | 9.44E-83 | 0.68808646 | 2.76E-27   |
| 2.96E-21   | -0.6468363 | 2.63E-23   | 0.72652802 | 1.22E-31 | 0.78808728 | 2.04E-40   |
| 1.57E-23   | -0.5454883 | 9.84E-16   | 0.83514672 | 2.18E-49 | 0.57919507 | 5.79E-18   |
| 7.61E-06   | -0.2561209 | 0.00043336 | 0.53493055 | 4.38E-15 | 0.5043977  | 2.48E-13   |
| 1.42E-17   | -0.4814728 | 3.98E-12   | 0.79642007 | 7.86E-42 | 0.72807867 | 7.84E-32   |
| 9.03E-13   | -0.5504238 | 4.81E-16   | 0.63890745 | 1.30E-22 | 0.3893984  | 4.29E-08   |
| 1.24E-28   | -0.4735579 | 9.91E-12   | 0.8253136  | 2.70E-47 | 0.59248195 | 6.48E-19   |
| 8.87E-21   | -0.5162807 | 5.40E-14   | 0.74363972 | 7.94E-34 | 0.56878    | 3.01E-17   |
| 9.77E-60   | -0.4360288 | 5.52E-10   | 0.85530011 | 3.80E-54 | 0.44265113 | 2.81E-10   |
| 5.66E-15   | 0.3927258  | 3.22E-08   | -0.5187008 | 3.93E-14 | -0.5114222 | 1.01E-13   |
| 3.44E-27   | -0.5005566 | 4.00E-13   | 0.76894879 | 2.13E-37 | 0.37822464 | 1.11E-07   |
| 5.25E-28   | 0.30932741 | 1.83E-05   | -0.6193545 | 5.58E-21 | -0.5419432 | 1.63E-15   |
| 6.15E-34   | 0.42267515 | 2.06E-09   | -0.8442371 | 1.89E-51 | -0.692907  | 8.55E-28   |
| 1.47E-20   | -0.5205668 | 3.07E-14   | 0.89640023 | 1.42E-66 | 0.57280539 | 1.60E-17   |
| 2.16E-13   | 0.44367337 | 2.53E-10   | -0.7770073 | 1.24E-38 | -0.6328722 | 4.28E-22   |
| 1.70E-15   | -0.2978532 | 3.83E-05   | 0.67063239 | 1.59E-25 | 0.19193295 | 0.008864   |
| 2.02E-10   | -0.1340195 | 0.06895406 | 0.58980541 | 1.02E-18 | 0.0468237  | 0.52679776 |
| 2.40E-11   | -0.3833371 | 7.21E-08   | 0.58514403 | 2.20E-18 | 0.3724985  | 1.78E-07   |
| 9.07E-32   | 0.56536674 | 5.11E-17   | -0.8082982 | 5.78E-44 | -0.5865898 | 1.73E-18   |
| 2.69E-52   | -0.3477589 | 1.23E-06   | 0.71328068 | 4.65E-30 | 0.31561565 | 1.21E-05   |
| 1.04E-15   | -0.1063574 | 0.14961219 | 0.61394265 | 1.51E-20 | 0.1131999  | 0.12498416 |
| 1.85E-15   | 0.63646742 | 2.11E-22   | -0.7175511 | 1.47E-30 | -0.1443736 | 0.04991777 |
| 2.00E-23   | -0.3098759 | 1.77E-05   | 0.57963632 | 5.40E-18 | 0.11511403 | 0.11868918 |
| 3.99E-06   | -0.1986092 | 0.00672591 | 0.44045295 | 3.52E-10 | 0.01932977 | 0.79397245 |
| 3.94E-20   | 0.26192564 | 0.00031637 | -0.7202251 | 7.07E-31 | -0.3026149 | 2.83E-05   |
| 2.16E-48   | -0.5415567 | 1.73E-15   | 0.93789781 | 4.55E-86 | 0.46643579 | 2.21E-11   |
| 1.17E-10   | -0.1778098 | 0.01546041 | 0.46538381 | 2.48E-11 | 0.33197591 | 3.91E-06   |
| 3.43E-19   | 0.59514687 | 4.12E-19   | -0.7775811 | 1.01E-38 | -0.4426162 | 2.82E-10   |
| 1.93E-23   | 0.5216853  | 2.65E-14   | -0.6687199 | 2.44E-25 | -0.8129538 | 7.67E-45   |

|            |            |            |            |            |            |            |
|------------|------------|------------|------------|------------|------------|------------|
| 8.08E-28   | -0.5966561 | 3.19E-19   | 0.91814199 | 1.72E-75   | 0.73280355 | 2.01E-32   |
| 6.70E-08   | -0.3986033 | 1.92E-08   | 0.71441905 | 3.43E-30   | 0.38029157 | 9.32E-08   |
| 2.05E-24   | 0.63232911 | 4.75E-22   | -0.6537578 | 6.24E-24   | -0.5979948 | 2.53E-19   |
| 1.00E-11   | -0.3696025 | 2.25E-07   | 0.7770484  | 1.22E-38   | 0.68923141 | 2.09E-27   |
| 2.07E-32   | -0.4016942 | 1.45E-08   | 0.59476387 | 4.40E-19   | 0.53034921 | 8.23E-15   |
| 6.13E-23   | -0.5669406 | 4.01E-17   | 0.89567278 | 2.61E-66   | 0.61717366 | 8.35E-21   |
| 0.69765039 | -0.400871  | 1.56E-08   | 0.27567405 | 0.00014586 | 0.24571995 | 0.00074804 |
| 3.78E-15   | -0.350694  | 9.88E-07   | 0.57048837 | 2.31E-17   | 0.36534717 | 3.16E-07   |
| 5.25E-19   | 0.3107475  | 1.67E-05   | -0.5897586 | 1.02E-18   | -0.7419174 | 1.34E-33   |
| 1.68E-35   | 0.52958756 | 9.14E-15   | -0.8130794 | 7.25E-45   | -0.2872564 | 7.35E-05   |
| 4.53E-14   | 0.39151369 | 3.58E-08   | -0.5460521 | 9.07E-16   | -0.7052227 | 3.86E-29   |
| 2.93E-43   | 0.23215009 | 0.00147409 | -0.7219048 | 4.45E-31   | -0.4643085 | 2.79E-11   |
| 1.04E-13   | 0.39772791 | 2.07E-08   | -0.5895259 | 1.06E-18   | -0.4143744 | 4.53E-09   |
| 2.81E-24   | -0.5261786 | 1.45E-14   | 0.87711383 | 3.47E-60   | 0.72764325 | 8.88E-32   |
| 7.74E-30   | -0.5262776 | 1.43E-14   | 0.92350131 | 4.50E-78   | 0.79558498 | 1.10E-41   |
| 5.67E-19   | -0.1983463 | 0.00680048 | 0.41387998 | 4.74E-09   | 0.035095   | 0.63531848 |
| 1.35E-12   | -0.4781749 | 5.84E-12   | 0.81054494 | 2.20E-44   | 0.49931311 | 4.67E-13   |
| 7.07E-31   | -0.6315942 | 5.48E-22   | 0.92427693 | 1.84E-78   | 0.6519538  | 9.11E-24   |
| 6.52E-12   | -0.3326851 | 3.71E-06   | 0.34595095 | 1.41E-06   | -0.0646379 | 0.38204951 |
| 2.36E-19   | -0.5773011 | 7.86E-18   | 0.81568155 | 2.29E-45   | 0.65477797 | 5.03E-24   |
| 9.46E-14   | -0.4766883 | 6.93E-12   | 0.72934797 | 5.46E-32   | 0.3610369  | 4.45E-07   |
| 1.85E-20   | -0.452894  | 9.62E-11   | 0.77980316 | 4.50E-39   | 0.73259059 | 2.14E-32   |
| 6.73E-65   | 0.54027739 | 2.07E-15   | -0.7945293 | 1.67E-41   | -0.4708424 | 1.35E-11   |
| 1.90E-08   | -0.4533021 | 9.22E-11   | 0.71326388 | 4.67E-30   | 0.23330579 | 0.00139339 |
| 4.08E-09   | -0.4798338 | 4.82E-12   | 0.64593347 | 3.16E-23   | 0.21593101 | 0.00315745 |
| 1.36E-31   | 0.34573385 | 1.43E-06   | -0.8385249 | 3.86E-50   | -0.4731218 | 1.04E-11   |
| 7.41E-10   | 0.12395976 | 0.09274401 | -0.5688841 | 2.97E-17   | -0.5916123 | 7.50E-19   |
| 2.00E-20   | -0.4199978 | 2.66E-09   | 0.65908941 | 2.01E-24   | 0.22051773 | 0.00255917 |
| 7.39E-39   | 0.25179024 | 0.00054546 | -0.6945863 | 5.66E-28   | -0.4453348 | 2.13E-10   |
| 6.13E-22   | -0.2162727 | 0.00310887 | 0.65699048 | 3.15E-24   | 0.5922086  | 6.78E-19   |
| 1.11E-26   | -0.4162586 | 3.79E-09   | 0.77783687 | 9.19E-39   | 0.7136262  | 4.24E-30   |
| 7.26E-05   | -0.3068986 | 2.15E-05   | 0.56698469 | 3.98E-17   | 0.67991096 | 1.91E-26   |
| 4.46E-23   | -0.5253837 | 1.62E-14   | 0.88690789 | 2.77E-63   | 0.72519049 | 1.78E-31   |
| 1.42E-20   | 0.53735495 | 3.12E-15   | -0.7263279 | 1.29E-31   | -0.2289833 | 0.00171759 |
| 2.95E-13   | 0.04201123 | 0.57017605 | 0.36847994 | 2.46E-07   | 0.10839326 | 0.1419289  |
| 1.11E-39   | 0.42930048 | 1.08E-09   | -0.7373467 | 5.29E-33   | -0.4815782 | 3.93E-12   |
| 4.37E-42   | 0.44819342 | 1.58E-10   | -0.7837141 | 1.06E-39   | -0.4755726 | 7.88E-12   |
| 2.94E-05   | 0.25377311 | 0.00049117 | -0.5307334 | 7.81E-15   | -0.5236445 | 2.04E-14   |
| 2.61E-30   | -0.2807316 | 0.00010856 | 0.78384425 | 1.01E-39   | 0.29744665 | 3.93E-05   |
| 1.21E-22   | -0.5218436 | 2.59E-14   | 0.79900228 | 2.78E-42   | 0.4331793  | 7.34E-10   |
| 4.61E-28   | 0.53677424 | 3.39E-15   | -0.8813371 | 1.73E-61   | -0.5335313 | 5.31E-15   |
| 4.87E-18   | 0.18780701 | 0.01046847 | -0.5879418 | 1.39E-18   | -0.5926084 | 6.34E-19   |
| 4.24E-13   | 0.36604882 | 2.99E-07   | -0.5858015 | 1.97E-18   | -0.6494289 | 1.54E-23   |
| 3.38E-29   | 0.38013125 | 9.45E-08   | -0.7430338 | 9.56E-34   | -0.7340652 | 1.39E-32   |
| 3.12E-31   | 0.4043579  | 1.14E-08   | -0.6975334 | 2.72E-28   | -0.2359008 | 0.00122671 |
| 7.89E-35   | 0.37230101 | 1.81E-07   | -0.5747792 | 1.17E-17   | -0.3612292 | 4.38E-07   |

|            |            |            |            |            |            |            |
|------------|------------|------------|------------|------------|------------|------------|
| 4.64E-14   | -0.4406449 | 3.45E-10   | 0.65484025 | 4.97E-24   | 0.7804458  | 3.55E-39   |
| 1.14E-14   | -0.6176531 | 7.65E-21   | 0.83026822 | 2.47E-48   | 0.66043475 | 1.50E-24   |
| 1.44E-33   | 0.56888977 | 2.96E-17   | -0.7857118 | 5.02E-40   | -0.4778179 | 6.09E-12   |
| 2.77E-46   | -0.3969584 | 2.22E-08   | 0.75461205 | 2.54E-35   | 0.3566432  | 6.27E-07   |
| 4.56E-40   | -0.5629902 | 7.36E-17   | 0.66737451 | 3.29E-25   | 0.25576976 | 0.00044158 |
| 6.55E-14   | -0.4240207 | 1.81E-09   | 0.67037502 | 1.69E-25   | 0.75625615 | 1.49E-35   |
| 2.78E-22   | -0.527412  | 1.23E-14   | 0.88146466 | 1.58E-61   | 0.79722815 | 5.68E-42   |
| 1.46E-08   | -0.5023753 | 3.19E-13   | 0.73174653 | 2.74E-32   | 0.56380228 | 6.50E-17   |
| 3.55E-11   | 0.31334009 | 1.41E-05   | -0.7809024 | 3.01E-39   | -0.2621672 | 0.00031221 |
| 6.89E-41   | 0.62406729 | 2.31E-21   | -0.8803021 | 3.64E-61   | -0.4466611 | 1.86E-10   |
| 6.10E-13   | -0.3332144 | 3.58E-06   | 0.53337042 | 5.43E-15   | -0.0990919 | 0.17960708 |
| 1.57E-08   | -0.4646639 | 2.69E-11   | 0.7612626  | 2.88E-36   | 0.54797531 | 6.87E-16   |
| 0.6708737  | -0.4147616 | 4.37E-09   | 0.38902144 | 4.44E-08   | 0.30816065 | 1.98E-05   |
| 0.00014002 | -0.3520029 | 8.95E-07   | 0.59694969 | 3.03E-19   | 0.31752457 | 1.06E-05   |
| 5.90E-17   | 0.76085424 | 3.30E-36   | -0.7492539 | 1.40E-34   | -0.5582668 | 1.50E-16   |
| 5.05E-13   | -0.4333413 | 7.22E-10   | 0.79122653 | 6.08E-41   | 0.58982766 | 1.01E-18   |
| 2.58E-20   | -0.5420932 | 1.60E-15   | 0.8931713  | 2.02E-65   | 0.59434481 | 4.73E-19   |
| 0.28137174 | -0.1683401 | 0.0219909  | 0.24090636 | 0.00095568 | 0.36437006 | 3.42E-07   |
| 7.37E-05   | 0.03276049 | 0.65799031 | 0.55688866 | 1.85E-16   | 0.37899627 | 1.04E-07   |
| 0.00050596 | -0.3349904 | 3.15E-06   | 0.58921208 | 1.12E-18   | 0.4640903  | 2.86E-11   |
| 8.38E-05   | -0.3139897 | 1.35E-05   | 0.50339408 | 2.81E-13   | 0.64091749 | 8.72E-23   |
| 2.72E-42   | 0.56196917 | 8.59E-17   | -0.6964358 | 3.58E-28   | -0.7874942 | 2.55E-40   |
| 1.15E-18   | 0.45062143 | 1.22E-10   | -0.7703422 | 1.31E-37   | -0.6548344 | 4.97E-24   |
| 4.03E-16   | -0.335873  | 2.96E-06   | 0.62697831 | 1.33E-21   | 0.09178978 | 0.21400086 |
| 1.11E-40   | -0.4396964 | 3.80E-10   | 0.92343985 | 4.83E-78   | 0.53698054 | 3.29E-15   |
| 9.47E-27   | -0.2444548 | 0.00079816 | 0.74499945 | 5.23E-34   | 0.329204   | 4.75E-06   |
| 2.04E-32   | -0.0993351 | 0.17853613 | 0.67480446 | 6.20E-26   | 0.3145814  | 1.29E-05   |
| 5.72E-13   | 0.02152292 | 0.77120976 | -0.3267768 | 5.63E-06   | -0.0205827 | 0.78094585 |
| 5.29E-32   | 0.58433873 | 2.51E-18   | -0.5878096 | 1.42E-18   | -0.5969252 | 3.04E-19   |
| 1.53E-60   | -0.3962489 | 2.36E-08   | 0.75019253 | 1.04E-34   | 0.45402696 | 8.53E-11   |
| 7.81E-12   | -0.368627  | 2.43E-07   | 0.80155716 | 9.78E-43   | 0.4288541  | 1.13E-09   |
| 3.44E-13   | 0.25224975 | 0.00053241 | -0.5600858 | 1.14E-16   | -0.5946684 | 4.47E-19   |
| 7.74E-26   | 0.4894893  | 1.54E-12   | -0.8228502 | 8.62E-47   | -0.5990468 | 2.11E-19   |
| 1.45E-27   | 0.56559525 | 4.93E-17   | -0.7511224 | 7.74E-35   | -0.7684742 | 2.51E-37   |
| 2.18E-46   | 0.40732522 | 8.71E-09   | -0.8584019 | 6.08E-55   | -0.5519885 | 3.82E-16   |
| 1.72E-11   | 0.2927191  | 5.27E-05   | -0.6510555 | 1.10E-23   | -0.535202  | 4.21E-15   |
| 0.00016563 | 0.29861745 | 3.65E-05   | -0.580964  | 4.35E-18   | -0.5887429 | 1.21E-18   |
| 6.93E-46   | 0.42490826 | 1.66E-09   | -0.7914142 | 5.65E-41   | -0.5389873 | 2.48E-15   |
| 4.57E-29   | -0.5428812 | 1.43E-15   | 0.85330539 | 1.21E-53   | 0.69759964 | 2.67E-28   |
| 6.54E-32   | 0.07077687 | 0.33839267 | -0.477945  | 6.00E-12   | -0.1822774 | 0.013018   |
| 7.23E-39   | 0.33804307 | 2.53E-06   | -0.6549317 | 4.87E-24   | -0.4854571 | 2.49E-12   |
| 6.86E-21   | -0.6051499 | 7.29E-20   | 0.88131176 | 1.76E-61   | 0.61527907 | 1.18E-20   |
| 5.47E-13   | 0.46505359 | 2.57E-11   | -0.5281131 | 1.12E-14   | -0.5978026 | 2.62E-19   |
| 1.59E-13   | 0.49587835 | 7.13E-13   | -0.8217873 | 1.41E-46   | -0.4127984 | 5.25E-09   |
| 1.17E-43   | -0.5025523 | 3.12E-13   | 0.94307654 | 2.00E-89   | 0.74690679 | 2.90E-34   |
| 1.49E-45   | -0.602341  | 1.19E-19   | 0.97059638 | 3.96E-115  | 0.73336158 | 1.71E-32   |

|            |            |            |            |           |            |            |
|------------|------------|------------|------------|-----------|------------|------------|
| 7.24E-16   | 0.29201564 | 5.50E-05   | -0.5749457 | 1.14E-17  | 0.00774018 | 0.91672038 |
| 1.63E-13   | 0.47054798 | 1.39E-11   | -0.6660909 | 4.38E-25  | -0.7202847 | 6.96E-31   |
| 1.31E-07   | -0.519934  | 3.34E-14   | 0.71169611 | 7.09E-30  | 0.42397647 | 1.81E-09   |
| 5.97E-24   | -0.5199716 | 3.33E-14   | 0.92117978 | 6.23E-77  | 0.5761336  | 9.47E-18   |
| 6.48E-47   | -0.5399045 | 2.18E-15   | 0.93035278 | 1.15E-81  | 0.76208129 | 2.19E-36   |
| 3.36E-10   | -0.4070991 | 8.89E-09   | 0.71088905 | 8.78E-30  | 0.6250576  | 1.92E-21   |
| 0.00141863 | -0.4193317 | 2.83E-09   | 0.58707661 | 1.60E-18  | 0.61154638 | 2.33E-20   |
| 3.13E-23   | 0.05471828 | 0.4594462  | -0.421052  | 2.40E-09  | -0.1680747 | 0.02220389 |
| 6.88E-18   | 0.56977494 | 2.58E-17   | -0.839488  | 2.34E-50  | -0.7237247 | 2.68E-31   |
| 4.65E-41   | -0.5367347 | 3.40E-15   | 0.95979399 | 6.57E-103 | 0.76423947 | 1.06E-36   |
| 2.29E-41   | -0.4418658 | 3.05E-10   | 0.91071198 | 3.45E-72  | 0.73291644 | 1.95E-32   |
| 3.29E-27   | 0.54865361 | 6.22E-16   | -0.730771  | 3.63E-32  | -0.3176059 | 1.06E-05   |
| 4.52E-22   | -0.4639846 | 2.90E-11   | 0.70624025 | 2.96E-29  | 0.45773174 | 5.73E-11   |
| 2.75E-36   | -0.4327628 | 7.65E-10   | 0.66998919 | 1.84E-25  | 0.24617208 | 0.00073084 |
| 0.12132491 | -0.3142445 | 1.32E-05   | 0.3331164  | 3.60E-06  | 0.08636711 | 0.24242649 |
| 4.96E-24   | -0.4913404 | 1.24E-12   | 0.55727859 | 1.74E-16  | 0.29166566 | 5.62E-05   |
| 1.42E-38   | -0.4957769 | 7.21E-13   | 0.81695991 | 1.29E-45  | 0.37263326 | 1.76E-07   |
| 1.99E-30   | -0.5167317 | 5.09E-14   | 0.76856376 | 2.43E-37  | 0.22939636 | 0.00168387 |
| 5.95E-40   | -0.4267395 | 1.39E-09   | 0.60727587 | 5.00E-20  | 0.21685405 | 0.00302776 |
| 7.42E-20   | -0.4901639 | 1.42E-12   | 0.82605899 | 1.89E-47  | 0.66921223 | 2.19E-25   |
| 4.80E-11   | -0.3869882 | 5.28E-08   | 0.67587843 | 4.85E-26  | 0.15311158 | 0.03746026 |
| 1.50E-20   | -0.4260086 | 1.49E-09   | 0.68538267 | 5.27E-27  | 0.199858   | 0.00638141 |
| 1.29E-38   | -0.6107107 | 2.71E-20   | 0.92057557 | 1.22E-76  | 0.626483   | 1.46E-21   |
| 3.03E-45   | -0.5697162 | 2.61E-17   | 0.8215616  | 1.57E-46  | 0.41182804 | 5.74E-09   |
| 4.30E-27   | -0.4219921 | 2.20E-09   | 0.60303499 | 1.06E-19  | 0.11455937 | 0.12048737 |
| 3.30E-27   | -0.54403   | 1.21E-15   | 0.63313349 | 4.07E-22  | 0.26638063 | 0.00024728 |
| 6.52E-43   | -0.5916807 | 7.41E-19   | 0.86642458 | 4.30E-57  | 0.82310112 | 7.67E-47   |
| 7.19E-25   | -0.4462914 | 1.93E-10   | 0.8274402  | 9.77E-48  | 0.79838989 | 3.56E-42   |
| 6.19E-15   | 0.82296685 | 8.16E-47   | -0.7553234 | 2.02E-35  | -0.5034435 | 2.79E-13   |
| 8.57E-16   | -0.3647157 | 3.33E-07   | 0.78564559 | 5.14E-40  | 0.65430548 | 5.56E-24   |
| 5.18E-56   | -0.5430523 | 1.39E-15   | 0.92465176 | 1.19E-78  | 0.51190904 | 9.53E-14   |
| 4.56E-34   | -0.6171567 | 8.38E-21   | 0.94657649 | 7.07E-92  | 0.68677669 | 3.78E-27   |
| 1.93E-16   | -0.5114994 | 1.00E-13   | 0.83579583 | 1.57E-49  | 0.54143967 | 1.75E-15   |
| 1.76E-20   | 0.66008599 | 1.62E-24   | -0.670158  | 1.77E-25  | -0.2966196 | 4.14E-05   |
| 1.14E-49   | -0.3995814 | 1.76E-08   | 0.91614886 | 1.42E-74  | 0.68901241 | 2.21E-27   |
| 2.49E-16   | 0.25843233 | 0.00038266 | -0.6588917 | 2.10E-24  | -0.5691117 | 2.86E-17   |
| 1.83E-59   | -0.5394337 | 2.33E-15   | 0.80033792 | 1.61E-42  | 0.39295738 | 3.15E-08   |
| 3.68E-06   | -0.5969468 | 3.03E-19   | 0.7017399  | 9.41E-29  | 0.48773955 | 1.90E-12   |
| 4.16E-24   | 0.34794237 | 1.22E-06   | -0.6838217 | 7.63E-27  | -0.7004445 | 1.31E-28   |
| 7.34E-16   | 0.55203779 | 3.79E-16   | -0.5656238 | 4.91E-17  | -0.3738929 | 1.58E-07   |
| 2.78E-35   | -0.4243392 | 1.75E-09   | 0.84436238 | 1.76E-51  | 0.42919711 | 1.09E-09   |
| 1.49E-15   | -0.4935751 | 9.43E-13   | 0.81299363 | 7.53E-45  | 0.77089925 | 1.08E-37   |
| 1.92E-35   | 0.26313656 | 0.00029601 | -0.5451695 | 1.03E-15  | -0.2892278 | 6.53E-05   |
| 6.73E-20   | 0.30046585 | 3.25E-05   | -0.5301389 | 8.47E-15  | -0.4221676 | 2.16E-09   |
| 6.59E-16   | 0.3635119  | 3.66E-07   | -0.6828772 | 9.53E-27  | -0.3115032 | 1.59E-05   |
| 2.19E-55   | -0.4556412 | 7.18E-11   | 0.74741008 | 2.48E-34  | 0.34925973 | 1.10E-06   |



|            |            |            |            |           |            |            |
|------------|------------|------------|------------|-----------|------------|------------|
| 2.99E-56   | 0.42422608 | 1.77E-09   | -0.7837718 | 1.04E-39  | -0.5115387 | 9.99E-14   |
| 7.15E-51   | -0.5784892 | 6.49E-18   | 0.96370281 | 6.77E-107 | 0.65060601 | 1.21E-23   |
| 7.95E-55   | -0.4608791 | 4.07E-11   | 0.91295465 | 3.73E-73  | 0.55788995 | 1.59E-16   |
| 9.73E-20   | 0.28926326 | 6.51E-05   | -0.5319411 | 6.62E-15  | -0.4711158 | 1.31E-11   |
| 6.96E-11   | 0.23112136 | 0.00154949 | -0.531273  | 7.25E-15  | 0.1669372  | 0.02313714 |
| 2.02E-22   | 0.77965861 | 4.74E-39   | -0.5586228 | 1.43E-16  | -0.527487  | 1.22E-14   |
| 6.02E-37   | 0.28945587 | 6.44E-05   | -0.5651124 | 5.32E-17  | -0.397679  | 2.08E-08   |
| 3.78E-18   | -0.3652875 | 3.18E-07   | 0.81019706 | 2.55E-44  | 0.32304342 | 7.29E-06   |
| 3.08E-19   | -0.4614518 | 3.82E-11   | 0.8590723  | 4.06E-55  | 0.77512435 | 2.43E-38   |
| 4.17E-48   | -0.5939549 | 5.05E-19   | 0.8838738  | 2.70E-62  | 0.76127801 | 2.87E-36   |
| 2.17E-44   | -0.5002507 | 4.16E-13   | 0.94780546 | 8.90E-93  | 0.73016589 | 4.32E-32   |
| 3.77E-48   | -0.6024762 | 1.16E-19   | 0.96613666 | 1.32E-109 | 0.62606791 | 1.58E-21   |
| 6.07E-23   | 0.53409059 | 4.92E-15   | -0.7384663 | 3.79E-33  | -0.2537255 | 0.00049241 |
| 2.63E-19   | -0.2143603 | 0.00338973 | 0.62700301 | 1.33E-21  | 0.19046523 | 0.00940789 |
| 9.03E-17   | 0.70140488 | 1.03E-28   | -0.6468557 | 2.62E-23  | -0.297833  | 3.83E-05   |
| 2.74E-17   | 0.44191929 | 3.03E-10   | -0.7665246 | 4.89E-37  | -0.6953228 | 4.71E-28   |
| 9.73E-06   | -0.1747053 | 0.01738491 | 0.19599558 | 0.007501  | -0.1890735 | 0.00995067 |
| 4.25E-11   | 0.29495738 | 4.59E-05   | -0.6367413 | 2.00E-22  | -0.0340793 | 0.6451428  |
| 2.48E-14   | -0.4771365 | 6.58E-12   | 0.78823402 | 1.93E-40  | 0.4016745  | 1.45E-08   |
| 1.30E-25   | 0.33335347 | 3.54E-06   | -0.4649114 | 2.61E-11  | -0.0755258 | 0.30689488 |
| 1.32E-29   | -0.4420481 | 2.99E-10   | 0.84135469 | 8.78E-51  | 0.30807542 | 1.99E-05   |
| 1.04E-14   | 0.22321383 | 0.00225747 | -0.4088507 | 7.57E-09  | 0.12670266 | 0.08568815 |
| 2.35E-37   | -0.6161724 | 1.00E-20   | 0.90871169 | 2.38E-71  | 0.58786414 | 1.40E-18   |
| 8.94E-32   | 0.50652977 | 1.89E-13   | -0.651784  | 9.44E-24  | -0.3478062 | 1.23E-06   |
| 1.52E-45   | -0.5242965 | 1.87E-14   | 0.92877352 | 8.35E-81  | 0.80063535 | 1.43E-42   |
| 1.57E-19   | -0.5366394 | 3.45E-15   | 0.61690754 | 8.77E-21  | 0.32636452 | 5.80E-06   |
| 1.16E-16   | 0.72652831 | 1.22E-31   | -0.6711596 | 1.41E-25  | -0.6692854 | 2.15E-25   |
| 3.11E-34   | 0.51113378 | 1.05E-13   | -0.8336618 | 4.60E-49  | -0.6119912 | 2.15E-20   |
| 0.04317843 | 0.17575436 | 0.0167125  | -0.4176382 | 3.33E-09  | -0.6060098 | 6.26E-20   |
| 7.93E-28   | 0.78288132 | 1.45E-39   | -0.8442436 | 1.88E-51  | -0.3776144 | 1.17E-07   |
| 9.13E-17   | 0.4745327  | 8.87E-12   | -0.4562468 | 6.72E-11  | -0.1213503 | 0.09987882 |
| 1.44E-26   | 0.47532266 | 8.10E-12   | -0.7463195 | 3.48E-34  | -0.7414362 | 1.55E-33   |
| 2.47E-18   | 0.42169009 | 2.26E-09   | -0.7314159 | 3.01E-32  | -0.4236465 | 1.87E-09   |
| 0.42839037 | 0.17529437 | 0.0170045  | -0.3438294 | 1.65E-06  | -0.2944598 | 4.73E-05   |
| 1.31E-06   | 0.25266267 | 0.00052092 | -0.3870539 | 5.26E-08  | -0.5505124 | 4.75E-16   |
| 2.94E-15   | -0.5524484 | 3.57E-16   | 0.81975948 | 3.61E-46  | 0.65045449 | 1.24E-23   |
| 3.45E-13   | -0.4564723 | 6.56E-11   | 0.71504377 | 2.90E-30  | 0.73187866 | 2.63E-32   |
| 8.04E-08   | 0.15520345 | 0.03490259 | -0.3891651 | 4.38E-08  | -0.3997269 | 1.73E-08   |
| 3.26E-28   | 0.43449274 | 6.44E-10   | -0.7339069 | 1.46E-32  | -0.7638199 | 1.22E-36   |
| 1.35E-22   | -0.292463  | 5.35E-05   | 0.75728226 | 1.07E-35  | 0.67850051 | 2.65E-26   |
| 1.35E-19   | 0.77643109 | 1.53E-38   | -0.8014282 | 1.03E-42  | -0.3191011 | 9.55E-06   |
| 5.76E-42   | 0.48625882 | 2.27E-12   | -0.7774812 | 1.05E-38  | -0.5604889 | 1.08E-16   |
| 1.44E-30   | 0.70954913 | 1.25E-29   | -0.6453332 | 3.57E-23  | -0.5174648 | 4.63E-14   |
| 6.15E-31   | -0.5115959 | 9.92E-14   | 0.91162194 | 1.41E-72  | 0.60411834 | 8.74E-20   |
| 1.58E-32   | -0.5186772 | 3.95E-14   | 0.83326855 | 5.60E-49  | 0.30342705 | 2.69E-05   |
| 4.18E-41   | -0.5342484 | 4.81E-15   | 0.95070066 | 5.49E-95  | 0.66849828 | 2.57E-25   |

|            |            |            |            |          |            |            |
|------------|------------|------------|------------|----------|------------|------------|
| 1.54E-40   | 0.35276086 | 8.44E-07   | -0.644201  | 4.50E-23 | -0.2650189 | 0.00026675 |
| 2.92E-17   | 0.37315777 | 1.68E-07   | -0.599357  | 2.00E-19 | -0.6753329 | 5.49E-26   |
| 1.58E-15   | -0.6150593 | 1.23E-20   | 0.77511323 | 2.44E-38 | 0.47864044 | 5.53E-12   |
| 4.98E-07   | -0.3872817 | 5.15E-08   | 0.73840651 | 3.86E-33 | 0.56312577 | 7.21E-17   |
| 7.53E-17   | -0.4637737 | 2.96E-11   | 0.85655252 | 1.82E-54 | 0.64902205 | 1.68E-23   |
| 3.38E-05   | -0.3106085 | 1.68E-05   | 0.67496019 | 5.98E-26 | 0.39349788 | 3.01E-08   |
| 2.68E-14   | -0.2884035 | 6.86E-05   | 0.7918345  | 4.80E-41 | 0.51685504 | 5.01E-14   |
| 3.38E-35   | 0.38144802 | 8.46E-08   | -0.6113147 | 2.43E-20 | -0.4153741 | 4.12E-09   |
| 2.65E-06   | 0.12191631 | 0.09829537 | -0.3226305 | 7.50E-06 | -0.4583234 | 5.37E-11   |
| 7.53E-21   | -0.4775672 | 6.26E-12   | 0.70688271 | 2.51E-29 | 0.44545055 | 2.10E-10   |
| 1.14E-33   | -0.3895497 | 4.24E-08   | 0.7347489  | 1.14E-32 | 0.43714114 | 4.93E-10   |
| 3.97E-38   | -0.4707329 | 1.36E-11   | 0.89662304 | 1.18E-66 | 0.61372052 | 1.57E-20   |
| 1.37E-15   | 0.35522987 | 6.99E-07   | -0.6376046 | 1.69E-22 | -0.7336285 | 1.58E-32   |
| 9.77E-32   | 0.39857784 | 1.92E-08   | -0.8339455 | 3.99E-49 | -0.5235903 | 2.05E-14   |
| 2.70E-09   | 0.3762867  | 1.30E-07   | -0.7232986 | 3.02E-31 | -0.5306688 | 7.88E-15   |
| 3.60E-08   | 0.22735487 | 0.0018566  | -0.5415819 | 1.72E-15 | -0.5277563 | 1.17E-14   |
| 2.21E-07   | 0.26175703 | 0.00031931 | -0.5219114 | 2.57E-14 | -0.6194887 | 5.45E-21   |
| 9.64E-14   | 0.31904536 | 9.59E-06   | -0.5665728 | 4.24E-17 | -0.5591631 | 1.31E-16   |
| 4.79E-12   | 0.27567859 | 0.00014582 | -0.53449   | 4.65E-15 | -0.5010424 | 3.77E-13   |
| 7.90E-15   | 0.38093252 | 8.83E-08   | -0.6012303 | 1.45E-19 | -0.5403937 | 2.03E-15   |
| 5.15E-16   | 0.3420256  | 1.89E-06   | -0.6208802 | 4.20E-21 | -0.6289165 | 9.19E-22   |
| 5.60E-12   | 0.3498314  | 1.06E-06   | -0.6670172 | 3.57E-25 | -0.5774647 | 7.65E-18   |
| 2.27E-30   | 0.49544099 | 7.52E-13   | -0.8506659 | 5.44E-53 | -0.5811714 | 4.21E-18   |
| 3.22E-22   | -0.5547179 | 2.55E-16   | 0.69073743 | 1.45E-27 | 0.60619462 | 6.06E-20   |
| 0.0001218  | 0.33055289 | 4.32E-06   | -0.680971  | 1.49E-26 | -0.5027832 | 3.03E-13   |
| 2.23E-09   | -0.2553836 | 0.00045079 | 0.595305   | 4.01E-19 | 0.31090104 | 1.65E-05   |
| 3.69E-20   | -0.4576364 | 5.79E-11   | 0.79566391 | 1.06E-41 | 0.3740239  | 1.57E-07   |
| 4.38E-08   | 0.30345844 | 2.68E-05   | -0.5033753 | 2.82E-13 | -0.5801996 | 4.93E-18   |
| 2.27E-07   | 0.26791407 | 0.00022695 | -0.6280758 | 1.08E-21 | -0.3783882 | 1.09E-07   |
| 4.00E-05   | -0.5266292 | 1.37E-14   | 0.65502712 | 4.77E-24 | 0.24207256 | 0.00090101 |
| 3.44E-59   | -0.5636181 | 6.68E-17   | 0.92886404 | 7.47E-81 | 0.61690174 | 8.78E-21   |
| 9.54E-20   | -0.2768335 | 0.00013638 | 0.53283162 | 5.85E-15 | 0.0686087  | 0.35343443 |
| 8.37E-51   | -0.5245609 | 1.80E-14   | 0.80303952 | 5.30E-43 | 0.51594213 | 5.65E-14   |
| 1.19E-28   | -0.422248  | 2.14E-09   | 0.79463381 | 1.60E-41 | 0.40664074 | 9.27E-09   |
| 1.57E-29   | -0.3569567 | 6.12E-07   | 0.67697658 | 3.77E-26 | 0.19393789 | 0.00816611 |
| 2.08E-22   | -0.3723115 | 1.80E-07   | 0.63511756 | 2.76E-22 | 0.31395242 | 1.35E-05   |
| 1.17E-31   | 0.37571357 | 1.36E-07   | -0.583675  | 2.80E-18 | -0.503977  | 2.61E-13   |
| 1.17E-22   | -0.398077  | 2.01E-08   | 0.67801985 | 2.96E-26 | 0.15169151 | 0.03928525 |
| 0.00785127 | -0.3958448 | 2.45E-08   | 0.53874058 | 2.57E-15 | -0.0078302 | 0.91575483 |
| 2.02E-23   | -0.4223553 | 2.12E-09   | 0.8161749  | 1.83E-45 | 0.31864103 | 9.85E-06   |
| 1.73E-14   | -0.2098677 | 0.0041417  | 0.46557207 | 2.43E-11 | 0.22071791 | 0.00253558 |
| 1.83E-37   | -0.4010174 | 1.54E-08   | 0.65658037 | 3.43E-24 | 0.17554055 | 0.01684768 |
| 1.82E-29   | -0.4245508 | 1.72E-09   | 0.85142035 | 3.55E-53 | 0.4694256  | 1.58E-11   |
| 9.69E-68   | -0.4965755 | 6.54E-13   | 0.83467808 | 2.76E-49 | 0.43518133 | 6.01E-10   |
| 2.51E-19   | -0.4034749 | 1.24E-08   | 0.55978657 | 1.20E-16 | 0.67552676 | 5.25E-26   |
| 2.21E-10   | -0.5337159 | 5.18E-15   | 0.67902804 | 2.34E-26 | 0.29652733 | 4.16E-05   |

|            |            |            |            |          |            |            |
|------------|------------|------------|------------|----------|------------|------------|
| 8.42E-13   | -0.5166474 | 5.15E-14   | 0.78987958 | 1.02E-40 | 0.43125826 | 8.88E-10   |
| 4.28E-36   | -0.4290987 | 1.10E-09   | 0.90542403 | 5.20E-70 | 0.68967242 | 1.88E-27   |
| 7.45E-05   | 0.17975552 | 0.01435144 | -0.4175737 | 3.35E-09 | -0.5205932 | 3.06E-14   |
| 1.49E-54   | 0.52290943 | 2.25E-14   | -0.8682981 | 1.29E-57 | -0.5398973 | 2.18E-15   |
| 1.36E-16   | 0.35441547 | 7.44E-07   | -0.6152797 | 1.18E-20 | -0.0893981 | 0.22622962 |
| 5.69E-10   | -0.5285249 | 1.06E-14   | 0.72226401 | 4.03E-31 | 0.25173815 | 0.00054696 |
| 2.85E-18   | -0.4654498 | 2.46E-11   | 0.80747603 | 8.21E-44 | 0.75968296 | 4.86E-36   |
| 1.42E-29   | -0.4303847 | 9.69E-10   | 0.75831675 | 7.62E-36 | 0.83056193 | 2.14E-48   |
| 8.59E-17   | 0.34025018 | 2.15E-06   | -0.4843245 | 2.85E-12 | -0.2617993 | 0.00031857 |
| 2.82E-45   | -0.5453579 | 1.00E-15   | 0.70618396 | 3.01E-29 | 0.38679219 | 5.37E-08   |
| 9.97E-17   | -0.1584373 | 0.03124035 | 0.47320158 | 1.03E-11 | 0.0045138  | 0.9513763  |
| 3.52E-24   | 0.53601076 | 3.77E-15   | -0.8795812 | 6.10E-61 | -0.4798539 | 4.81E-12   |
| 1.15E-15   | 0.71748138 | 1.50E-30   | -0.5943776 | 4.70E-19 | -0.2432279 | 0.0008497  |
| 2.43E-09   | -0.5014682 | 3.57E-13   | 0.58963567 | 1.04E-18 | 0.76704716 | 4.09E-37   |
| 3.10E-77   | -0.5061931 | 1.98E-13   | 0.87044101 | 3.19E-58 | 0.52023938 | 3.21E-14   |
| 2.90E-17   | 0.74181218 | 1.39E-33   | -0.6403416 | 9.79E-23 | -0.4444244 | 2.34E-10   |
| 7.51E-51   | -0.5872244 | 1.56E-18   | 0.94747936 | 1.55E-92 | 0.58154762 | 3.96E-18   |
| 3.45E-39   | 0.31411964 | 1.34E-05   | -0.7868626 | 3.25E-40 | -0.601164  | 1.46E-19   |
| 1.52E-18   | 0.43097334 | 9.14E-10   | -0.7398089 | 2.54E-33 | -0.1635004 | 0.02616465 |
| 5.55E-60   | -0.5753743 | 1.07E-17   | 0.95271471 | 1.32E-96 | 0.6899892  | 1.74E-27   |
| 3.21E-06   | -0.2049765 | 0.00512824 | 0.45997863 | 4.49E-11 | 0.20637979 | 0.00482562 |
| 4.35E-10   | -0.3561025 | 6.53E-07   | 0.66672556 | 3.80E-25 | 0.10214036 | 0.16652269 |
| 2.32E-37   | -0.5477869 | 7.06E-16   | 0.77335724 | 4.56E-38 | 0.431376   | 8.78E-10   |
| 4.59E-43   | -0.4576584 | 5.78E-11   | 0.70432105 | 4.86E-29 | 0.18735116 | 0.01066058 |
| 2.07E-18   | 0.41272066 | 5.29E-09   | -0.6052641 | 7.14E-20 | -0.1346022 | 0.06774468 |
| 1.06E-08   | 0.32031491 | 8.79E-06   | -0.5585228 | 1.45E-16 | -0.0092292 | 0.90077542 |
| 2.82E-23   | 0.41187545 | 5.72E-09   | -0.696624  | 3.41E-28 | -0.6506922 | 1.18E-23   |
| 6.46E-40   | -0.5769728 | 8.28E-18   | 0.9212663  | 5.65E-77 | 0.75525912 | 2.06E-35   |
| 0.39920148 | 0.25244098 | 0.00052706 | -0.4534057 | 9.11E-11 | 0.0262168  | 0.72316576 |
| 3.02E-24   | -0.394639  | 2.72E-08   | 0.61062309 | 2.75E-20 | 0.26381476 | 0.00028514 |
| 1.43E-27   | -0.5947959 | 4.38E-19   | 0.8870885  | 2.41E-63 | 0.6845426  | 6.43E-27   |
| 7.14E-07   | -0.4368437 | 5.08E-10   | 0.72114661 | 5.49E-31 | 0.36602334 | 3.00E-07   |
| 1.40E-27   | 0.25886626 | 0.00037378 | -0.5461396 | 8.96E-16 | -0.5630733 | 7.26E-17   |
| 2.98E-34   | 0.38748539 | 5.06E-08   | -0.7224679 | 3.80E-31 | -0.6406847 | 9.14E-23   |
| 3.25E-38   | 0.2444082  | 0.00080006 | -0.6857587 | 4.82E-27 | -0.4503909 | 1.25E-10   |
| 1.16E-09   | -0.3895299 | 4.25E-08   | 0.71576091 | 2.39E-30 | 0.5713217  | 2.03E-17   |
| 9.98E-40   | 0.32611556 | 5.90E-06   | -0.8189436 | 5.24E-46 | -0.5181694 | 4.22E-14   |
| 2.58E-14   | 0.39008873 | 4.05E-08   | -0.5886003 | 1.24E-18 | -0.2782752 | 0.00012539 |
| 2.08E-13   | 0.33243774 | 3.78E-06   | -0.643163  | 5.55E-23 | 0.01652926 | 0.82329138 |
| 3.46E-47   | 0.38699313 | 5.28E-08   | -0.7328408 | 1.99E-32 | -0.5465357 | 8.46E-16   |
| 7.90E-20   | 0.74492363 | 5.36E-34   | -0.7057985 | 3.32E-29 | -0.5737821 | 1.38E-17   |
| 2.90E-09   | -0.4291859 | 1.09E-09   | 0.72653463 | 1.22E-31 | 0.36279838 | 3.87E-07   |
| 4.09E-10   | 0.42117912 | 2.37E-09   | -0.7363129 | 7.19E-33 | -0.2497786 | 0.00060616 |
| 1.40E-16   | 0.40987072 | 6.89E-09   | -0.6200692 | 4.89E-21 | -0.0230987 | 0.75497366 |
| 6.04E-37   | -0.4716415 | 1.23E-11   | 0.7388767  | 3.35E-33 | 0.27584177 | 0.00014445 |
| 2.14E-07   | 0.32297753 | 7.33E-06   | -0.7020635 | 8.67E-29 | -0.2779234 | 0.000128   |

|            |            |            |            |          |            |            |
|------------|------------|------------|------------|----------|------------|------------|
| 0.00737884 | -0.2774679 | 0.00013144 | 0.46989152 | 1.50E-11 | 0.05700778 | 0.44084847 |
| 7.20E-26   | -0.4108544 | 6.29E-09   | 0.63464628 | 3.03E-22 | 0.16725568 | 0.0228725  |
| 7.63E-24   | 0.50258883 | 3.11E-13   | -0.9137288 | 1.71E-73 | -0.5480387 | 6.80E-16   |
| 2.53E-14   | -0.2670428 | 0.0002383  | 0.80373587 | 3.97E-43 | 0.65117468 | 1.07E-23   |
| 1.25E-23   | -0.5411398 | 1.83E-15   | 0.88113735 | 2.00E-61 | 0.55197574 | 3.83E-16   |
| 1.67E-18   | 0.3820942  | 8.01E-08   | -0.7375857 | 4.93E-33 | -0.7568449 | 1.23E-35   |
| 1.32E-12   | 0.21699584 | 0.00300827 | -0.4886932 | 1.70E-12 | -0.0357788 | 0.62874005 |
| 2.33E-38   | 0.39791274 | 2.04E-08   | -0.8171323 | 1.19E-45 | -0.672486  | 1.05E-25   |
| 1.54E-45   | 0.51348418 | 7.77E-14   | -0.8357309 | 1.62E-49 | -0.6582623 | 2.40E-24   |
| 9.42E-37   | 0.27408786 | 0.00015982 | -0.760528  | 3.68E-36 | -0.4573647 | 5.96E-11   |
| 3.25E-38   | -0.57797   | 7.06E-18   | 0.80613231 | 1.45E-43 | 0.49900134 | 4.85E-13   |
| 3.35E-13   | 0.43108337 | 9.04E-10   | -0.7166818 | 1.86E-30 | -0.5151664 | 6.25E-14   |
| 1.35E-39   | 0.43797934 | 4.53E-10   | -0.6450889 | 3.75E-23 | -0.3944018 | 2.78E-08   |
| 3.44E-66   | -0.4823692 | 3.59E-12   | 0.83151232 | 1.34E-48 | 0.55514256 | 2.40E-16   |
| 3.14E-07   | -0.516299  | 5.39E-14   | 0.62258609 | 3.06E-21 | 0.51635831 | 5.35E-14   |
| 7.87E-09   | -0.3659056 | 3.03E-07   | 0.69265656 | 9.09E-28 | 0.56112285 | 9.77E-17   |
| 9.83E-38   | 0.32773845 | 5.27E-06   | -0.6450877 | 3.76E-23 | -0.3592125 | 5.13E-07   |
| 3.08E-08   | 0.57708174 | 8.14E-18   | -0.4998388 | 4.38E-13 | -0.5813258 | 4.11E-18   |
| 9.64E-13   | -0.471903  | 1.20E-11   | 0.75772561 | 9.25E-36 | 0.63600904 | 2.31E-22   |
| 1.50E-22   | -0.4339939 | 6.76E-10   | 0.76509943 | 7.94E-37 | 0.32075679 | 8.53E-06   |
| 0.00013277 | -0.3356742 | 3.00E-06   | 0.58801173 | 1.37E-18 | 0.48764784 | 1.92E-12   |
| 9.65E-26   | -0.5131246 | 8.14E-14   | 0.79715125 | 5.86E-42 | 0.48045246 | 4.49E-12   |
| 2.52E-39   | -0.3808008 | 8.93E-08   | 0.79908563 | 2.69E-42 | 0.49630191 | 6.77E-13   |
| 1.63E-50   | 0.45494186 | 7.74E-11   | -0.675248  | 5.60E-26 | -0.5023151 | 3.22E-13   |
| 5.68E-34   | 0.43225717 | 8.04E-10   | -0.783762  | 1.04E-39 | -0.3178496 | 1.04E-05   |
| 3.54E-18   | -0.4847708 | 2.70E-12   | 0.78389014 | 9.94E-40 | 0.58639767 | 1.79E-18   |
| 2.45E-23   | 0.44335645 | 2.61E-10   | -0.7929724 | 3.08E-41 | -0.733484  | 1.65E-32   |
| 4.00E-35   | -0.5652174 | 5.23E-17   | 0.91688404 | 6.55E-75 | 0.59513218 | 4.13E-19   |
| 3.09E-19   | -0.4186991 | 3.01E-09   | 0.79550571 | 1.13E-41 | 0.74307947 | 9.43E-34   |
| 3.57E-13   | -0.3180368 | 1.03E-05   | 0.40007818 | 1.68E-08 | -0.1230771 | 0.09511041 |
| 1.65E-33   | -0.5971616 | 2.92E-19   | 0.67665382 | 4.06E-26 | 0.26552074 | 0.00025941 |
| 6.05E-08   | -0.3573461 | 5.93E-07   | 0.56568896 | 4.86E-17 | 0.46553465 | 2.44E-11   |
| 1.87E-40   | -0.5404022 | 2.03E-15   | 0.86929414 | 6.76E-58 | 0.50866543 | 1.44E-13   |
| 8.33E-08   | -0.3683174 | 2.49E-07   | 0.67744563 | 3.38E-26 | 0.38306882 | 7.38E-08   |
| 2.03E-17   | 0.3215172  | 8.10E-06   | -0.6513939 | 1.02E-23 | -0.4023534 | 1.37E-08   |
| 1.62E-09   | -0.3896968 | 4.19E-08   | 0.63878976 | 1.33E-22 | 0.55469352 | 2.56E-16   |
| 3.29E-39   | 0.36670876 | 2.84E-07   | -0.6207018 | 4.35E-21 | -0.2522468 | 0.00053249 |
| 4.40E-05   | 0.37215841 | 1.83E-07   | -0.6154534 | 1.15E-20 | 0.05848633 | 0.42906919 |
| 5.20E-29   | 0.76405103 | 1.13E-36   | -0.8324329 | 8.49E-49 | -0.5921211 | 6.88E-19   |
| 0.00080144 | -0.2284896 | 0.00175869 | 0.49666163 | 6.47E-13 | 0.10072905 | 0.17248907 |
| 1.35E-06   | -0.3425011 | 1.82E-06   | 0.6860674  | 4.47E-27 | 0.52687395 | 1.32E-14   |
| 2.61E-37   | 0.41570554 | 4.00E-09   | -0.8225414 | 9.96E-47 | -0.7812217 | 2.67E-39   |
| 2.41E-19   | -0.5289129 | 1.00E-14   | 0.58088828 | 4.41E-18 | 0.14756537 | 0.04501766 |
| 7.62E-09   | 0.33870969 | 2.41E-06   | -0.647934  | 2.10E-23 | -0.0435497 | 0.55612674 |
| 4.42E-10   | -0.4796053 | 4.95E-12   | 0.81280131 | 8.20E-45 | 0.59386133 | 5.13E-19   |
| 2.74E-18   | -0.2542508 | 0.00047886 | 0.64082612 | 8.89E-23 | 0.06791979 | 0.35830017 |

|            |            |            |            |            |            |            |
|------------|------------|------------|------------|------------|------------|------------|
| 8.77E-45   | -0.5008905 | 3.84E-13   | 0.90442089 | 1.30E-69   | 0.52226117 | 2.45E-14   |
| 1.05E-19   | -0.4020104 | 1.41E-08   | 0.81896987 | 5.18E-46   | 0.59655162 | 3.24E-19   |
| 7.10E-20   | -0.2470645 | 0.00069796 | 0.76393962 | 1.18E-36   | 0.35649255 | 6.34E-07   |
| 3.36E-10   | -0.3754906 | 1.39E-07   | 0.59605726 | 3.53E-19   | 0.09701939 | 0.18892575 |
| 2.16E-34   | -0.4975659 | 5.79E-13   | 0.93962059 | 3.75E-87   | 0.61956406 | 5.37E-21   |
| 1.74E-27   | -0.3494526 | 1.09E-06   | 0.71903538 | 9.80E-31   | 0.19823427 | 0.00683251 |
| 5.81E-12   | -0.4300873 | 9.97E-10   | 0.79672901 | 6.94E-42   | 0.53741735 | 3.09E-15   |
| 7.27E-08   | 0.40741685 | 8.63E-09   | -0.5842095 | 2.56E-18   | -0.4401331 | 3.64E-10   |
| 2.55E-28   | -0.4547192 | 7.92E-11   | 0.88285646 | 5.72E-62   | 0.64574337 | 3.29E-23   |
| 7.31E-34   | -0.5830598 | 3.10E-18   | 0.88451188 | 1.68E-62   | 0.44261485 | 2.82E-10   |
| 4.26E-28   | 0.72813067 | 7.73E-32   | -0.7139238 | 3.91E-30   | -0.4329074 | 7.54E-10   |
| 5.80E-42   | -0.37451   | 1.51E-07   | 0.73466174 | 1.17E-32   | 0.37129186 | 1.96E-07   |
| 9.89E-22   | 0.3539419  | 7.72E-07   | -0.5320121 | 6.55E-15   | -0.4121379 | 5.58E-09   |
| 9.03E-17   | -0.2612217 | 0.00032881 | 0.4809693  | 4.22E-12   | 0.02902428 | 0.6949254  |
| 2.74E-18   | -0.4283675 | 1.18E-09   | 0.64980683 | 1.42E-23   | 0.18407407 | 0.01213554 |
| 0.72559634 | -0.2865502 | 7.67E-05   | 0.22653472 | 0.00193042 | 0.57266383 | 1.64E-17   |
| 1.08E-17   | -0.4714685 | 1.26E-11   | 0.84978039 | 8.95E-53   | 0.71558825 | 2.50E-30   |
| 3.09E-20   | -0.4418533 | 3.05E-10   | 0.57224563 | 1.75E-17   | 0.21310854 | 0.00358577 |
| 2.98E-19   | -0.2877231 | 7.15E-05   | 0.62266615 | 3.01E-21   | 0.83807062 | 4.88E-50   |
| 2.06E-31   | 0.4514331  | 1.12E-10   | -0.9157678 | 2.11E-74   | -0.5799822 | 5.10E-18   |
| 8.85E-64   | -0.5334333 | 5.39E-15   | 0.92350317 | 4.49E-78   | 0.64990702 | 1.39E-23   |
| 2.16E-10   | -0.410984  | 6.21E-09   | 0.76584296 | 6.17E-37   | 0.63934638 | 1.19E-22   |
| 4.55E-43   | -0.5724891 | 1.69E-17   | 0.93538552 | 1.52E-84   | 0.58186903 | 3.76E-18   |
| 4.51E-30   | 0.11313368 | 0.12520649 | -0.5703133 | 2.37E-17   | -0.3534134 | 8.03E-07   |
| 2.68E-42   | 0.28414704 | 8.86E-05   | -0.6802193 | 1.78E-26   | -0.4676169 | 1.94E-11   |
| 2.01E-11   | -0.4287023 | 1.14E-09   | 0.73156233 | 2.88E-32   | 0.64778156 | 2.16E-23   |
| 6.76E-57   | -0.5972973 | 2.86E-19   | 0.84226145 | 5.43E-51   | 0.65568955 | 4.15E-24   |
| 1.08E-06   | -0.4964557 | 6.64E-13   | 0.72375657 | 2.66E-31   | 0.61592597 | 1.05E-20   |
| 7.49E-20   | 0.7117127  | 7.06E-30   | -0.5552278 | 2.37E-16   | -0.4862673 | 2.27E-12   |
| 2.19E-09   | 0.74684625 | 2.96E-34   | -0.7174047 | 1.53E-30   | -0.5255123 | 1.59E-14   |
| 8.06E-44   | -0.4424903 | 2.86E-10   | 0.8054456  | 1.94E-43   | 0.32549104 | 6.16E-06   |
| 3.65E-44   | 0.39923754 | 1.81E-08   | -0.7143949 | 3.45E-30   | -0.4964461 | 6.65E-13   |
| 9.93E-25   | -0.5412133 | 1.81E-15   | 0.91132856 | 1.88E-72   | 0.77251478 | 6.14E-38   |
| 7.47E-17   | -0.5351598 | 4.24E-15   | 0.75578978 | 1.74E-35   | 0.80411315 | 3.39E-43   |
| 6.08E-14   | 0.20921648 | 0.00426236 | -0.5981361 | 2.47E-19   | -0.5415866 | 1.72E-15   |
| 9.05E-21   | 0.68912504 | 2.15E-27   | -0.8475266 | 3.14E-52   | -0.3329261 | 3.65E-06   |
| 4.26E-18   | 0.20661402 | 0.0047767  | -0.7115841 | 7.30E-30   | -0.2311051 | 0.00155071 |
| 2.86E-47   | -0.5057424 | 2.09E-13   | 0.93050624 | 9.51E-82   | 0.75626101 | 1.49E-35   |
| 2.19E-60   | -0.5296109 | 9.11E-15   | 0.9472678  | 2.22E-92   | 0.69893592 | 1.91E-28   |
| 2.91E-07   | -0.4983779 | 5.24E-13   | 0.57355574 | 1.43E-17   | 0.4451796  | 2.16E-10   |
| 3.80E-41   | -0.3317993 | 3.95E-06   | 0.60712741 | 5.14E-20   | 0.34955947 | 1.08E-06   |
| 6.24E-27   | -0.4656233 | 2.42E-11   | 0.84929422 | 1.18E-52   | 0.53438714 | 4.72E-15   |
| 9.67E-13   | 0.11279482 | 0.12634886 | -0.3795929 | 9.88E-08   | -0.3990835 | 1.83E-08   |
| 1.56E-36   | -0.4684502 | 1.76E-11   | 0.72775768 | 8.59E-32   | 0.57177867 | 1.89E-17   |
| 1.79E-21   | -0.5682043 | 3.30E-17   | 0.75929291 | 5.53E-36   | 0.27008373 | 0.00020083 |
| 1.41E-69   | -0.4112253 | 6.08E-09   | 0.75903988 | 6.01E-36   | 0.42806723 | 1.22E-09   |

|          |            |            |            |           |            |            |
|----------|------------|------------|------------|-----------|------------|------------|
| 4.85E-38 | -0.5994961 | 1.96E-19   | 0.96787244 | 1.16E-111 | 0.66025688 | 1.56E-24   |
| 2.21E-09 | -0.414359  | 4.53E-09   | 0.7013707  | 1.03E-28  | 0.27930985 | 0.00011803 |
| 7.74E-15 | -0.3806258 | 9.07E-08   | 0.63361289 | 3.70E-22  | 0.15974188 | 0.02985833 |
| 1.48E-38 | -0.4380976 | 4.47E-10   | 0.90647386 | 1.97E-70  | 0.47682107 | 6.83E-12   |
| 3.95E-22 | -0.5225996 | 2.35E-14   | 0.88835507 | 9.12E-64  | 0.75370349 | 3.40E-35   |
| 6.37E-32 | 0.27470219 | 0.00015427 | -0.6086058 | 3.95E-20  | -0.3136529 | 1.38E-05   |
| 2.39E-19 | -0.4696283 | 1.55E-11   | 0.83561759 | 1.71E-49  | 0.49818985 | 5.37E-13   |
| 7.46E-06 | 0.44639282 | 1.91E-10   | -0.6855093 | 5.11E-27  | -0.1847069 | 0.01183749 |
| 1.23E-23 | -0.3524925 | 8.62E-07   | 0.80933581 | 3.70E-44  | 0.43715284 | 4.92E-10   |
| 6.58E-33 | -0.4949866 | 7.95E-13   | 0.90061079 | 3.89E-68  | 0.46047353 | 4.26E-11   |
| 8.23E-07 | 0.29359743 | 4.99E-05   | -0.5213147 | 2.78E-14  | -0.1751017 | 0.01712809 |
| 8.83E-16 | 0.65020843 | 1.31E-23   | -0.7397675 | 2.57E-33  | -0.2202187 | 0.0025948  |
| 6.11E-19 | 0.45824245 | 5.42E-11   | -0.7788526 | 6.36E-39  | -0.285158  | 8.34E-05   |
| 1.39E-29 | -0.6247073 | 2.05E-21   | 0.92868733 | 9.29E-81  | 0.62740113 | 1.23E-21   |
| 1.37E-18 | -0.2523036 | 0.00053089 | 0.69349148 | 7.41E-28  | 0.51178983 | 9.67E-14   |
| 1.92E-11 | -0.184564  | 0.0119042  | 0.40130454 | 1.50E-08  | -0.017407  | 0.81407332 |
| 4.57E-31 | 0.2578168  | 0.00039559 | -0.6346028 | 3.05E-22  | -0.587308  | 1.54E-18   |
| 2.92E-09 | 0.52151297 | 2.71E-14   | -0.5158433 | 5.72E-14  | -0.6975144 | 2.73E-28   |
| 4.53E-16 | 0.39501565 | 2.63E-08   | -0.6634406 | 7.83E-25  | -0.4265297 | 1.41E-09   |
| 3.20E-44 | -0.3485825 | 1.16E-06   | 0.67603674 | 4.67E-26  | 0.44335507 | 2.61E-10   |
| 2.45E-07 | 0.35427509 | 7.52E-07   | -0.7105929 | 9.49E-30  | -0.494174  | 8.77E-13   |
| 5.54E-05 | 0.65428796 | 5.58E-24   | -0.6456506 | 3.35E-23  | -0.1755353 | 0.01685098 |
| 4.67E-40 | -0.3439922 | 1.63E-06   | 0.56130362 | 9.51E-17  | 0.27083537 | 0.00019245 |
| 1.61E-38 | -0.5576627 | 1.65E-16   | 0.93110127 | 4.45E-82  | 0.61760378 | 7.72E-21   |
| 5.08E-09 | -0.2983921 | 3.70E-05   | 0.70247747 | 7.80E-29  | 0.35374499 | 7.83E-07   |
| 1.81E-30 | -0.5114013 | 1.02E-13   | 0.89614568 | 1.76E-66  | 0.7464593  | 3.34E-34   |
| 7.90E-17 | -0.4174055 | 3.40E-09   | 0.78936635 | 1.25E-40  | 0.55043181 | 4.80E-16   |
| 5.83E-36 | 0.18931494 | 0.00985457 | -0.5012568 | 3.67E-13  | -0.2460047 | 0.00073716 |
| 3.58E-16 | 0.53488644 | 4.40E-15   | -0.7040872 | 5.17E-29  | -0.600933  | 1.52E-19   |
| 1.09E-23 | -0.4169179 | 3.56E-09   | 0.89464575 | 6.09E-66  | 0.72236999 | 3.91E-31   |
| 7.72E-14 | 0.29063808 | 5.99E-05   | -0.6647429 | 5.89E-25  | -0.6540233 | 5.90E-24   |
| 1.51E-10 | -0.5259179 | 1.50E-14   | 0.61060991 | 2.76E-20  | 0.69835629 | 2.21E-28   |
| 3.77E-06 | -0.4571465 | 6.10E-11   | 0.66206779 | 1.06E-24  | 0.47177998 | 1.21E-11   |
| 1.39E-24 | -0.4134944 | 4.92E-09   | 0.8438489  | 2.32E-51  | 0.6198913  | 5.05E-21   |
| 1.11E-20 | -0.4953644 | 7.59E-13   | 0.85806856 | 7.41E-55  | 0.660451   | 1.50E-24   |
| 1.29E-36 | -0.4753037 | 8.12E-12   | 0.84657359 | 5.30E-52  | 0.39637413 | 2.33E-08   |
| 9.13E-34 | 0.41762434 | 3.33E-09   | -0.7932949 | 2.71E-41  | -0.7204254 | 6.69E-31   |
| 4.21E-14 | 0.24025435 | 0.00098756 | -0.5489829 | 5.93E-16  | -0.4830111 | 3.33E-12   |
| 5.23E-10 | -0.5454012 | 9.96E-16   | 0.70739374 | 2.20E-29  | 0.57996753 | 5.12E-18   |
| 9.72E-11 | 0.72127279 | 5.30E-31   | -0.5731619 | 1.52E-17  | -0.6322413 | 4.84E-22   |
| 1.56E-16 | -0.4295595 | 1.05E-09   | 0.78428025 | 8.59E-40  | 0.64336957 | 5.32E-23   |
| 1.65E-37 | -0.3774372 | 1.18E-07   | 0.58201873 | 3.67E-18  | 0.48533867 | 2.53E-12   |
| 2.36E-66 | -0.5016552 | 3.49E-13   | 0.93947125 | 4.67E-87  | 0.58005568 | 5.04E-18   |
| 9.74E-12 | 0.43781547 | 4.60E-10   | -0.8272574 | 1.07E-47  | -0.5791406 | 5.85E-18   |
| 1.00E-22 | -0.4523877 | 1.02E-10   | 0.78825125 | 1.91E-40  | 0.42278818 | 2.03E-09   |
| 2.69E-25 | -0.5398704 | 2.19E-15   | 0.91843788 | 1.25E-75  | 0.74374719 | 7.69E-34   |

|            |            |            |            |          |            |            |
|------------|------------|------------|------------|----------|------------|------------|
| 2.47E-11   | 0.23251491 | 0.00144817 | -0.5803352 | 4.82E-18 | 0.07066637 | 0.33914929 |
| 7.55E-20   | -0.4665378 | 2.18E-11   | 0.87537686 | 1.15E-59 | 0.58422923 | 2.56E-18   |
| 3.72E-24   | 0.39887065 | 1.87E-08   | -0.7959536 | 9.46E-42 | -0.8170783 | 1.22E-45   |
| 8.39E-05   | 0.22550387 | 0.002027   | -0.4450742 | 2.19E-10 | -0.6567017 | 3.35E-24   |
| 0.00261092 | 0.16382148 | 0.02586813 | -0.3800379 | 9.52E-08 | -0.5373478 | 3.12E-15   |
| 2.45E-28   | 0.49124451 | 1.25E-12   | -0.5893892 | 1.09E-18 | -0.5032353 | 2.87E-13   |
| 3.75E-20   | -0.5913521 | 7.84E-19   | 0.80376381 | 3.92E-43 | 0.55029191 | 4.90E-16   |
| 4.38E-22   | -0.4317765 | 8.44E-10   | 0.58487879 | 2.30E-18 | 0.12453128 | 0.09123688 |
| 7.97E-31   | -0.5011158 | 3.74E-13   | 0.74390922 | 7.31E-34 | 0.60894959 | 3.71E-20   |
| 4.42E-16   | 0.30899805 | 1.87E-05   | -0.5974739 | 2.77E-19 | -0.5579176 | 1.58E-16   |
| 1.21E-18   | -0.5117929 | 9.67E-14   | 0.83319841 | 5.80E-49 | 0.56661742 | 4.22E-17   |
| 4.83E-05   | -0.3682338 | 2.51E-07   | 0.60486655 | 7.66E-20 | 0.54386547 | 1.24E-15   |
| 3.66E-05   | -0.3627113 | 3.90E-07   | 0.66543526 | 5.06E-25 | 0.5130374  | 8.24E-14   |
| 2.19E-41   | -0.4853158 | 2.54E-12   | 0.94145067 | 2.44E-88 | 0.68216356 | 1.13E-26   |
| 4.13E-19   | -0.3287169 | 4.92E-06   | 0.71801002 | 1.30E-30 | 0.69015004 | 1.68E-27   |
| 3.29E-49   | -0.4413455 | 3.21E-10   | 0.78534052 | 5.77E-40 | 0.4273017  | 1.31E-09   |
| 7.69E-35   | 0.43396581 | 6.78E-10   | -0.695499  | 4.51E-28 | -0.4823082 | 3.61E-12   |
| 2.94E-44   | 0.31026679 | 1.72E-05   | -0.6875876 | 3.11E-27 | -0.4897268 | 1.50E-12   |
| 7.99E-13   | 0.28256272 | 9.74E-05   | -0.7170214 | 1.70E-30 | -0.5562013 | 2.05E-16   |
| 5.45E-15   | -0.4433226 | 2.62E-10   | 0.77221685 | 6.81E-38 | 0.6764023  | 4.30E-26   |
| 4.33E-21   | -0.5675685 | 3.64E-17   | 0.90097082 | 2.84E-68 | 0.66004465 | 1.64E-24   |
| 1.66E-11   | -0.4772522 | 6.50E-12   | 0.74051525 | 2.05E-33 | 0.50353935 | 2.76E-13   |
| 0.00020745 | -0.3942915 | 2.80E-08   | 0.5420212  | 1.62E-15 | 0.57216151 | 1.78E-17   |
| 2.75E-18   | -0.4173769 | 3.41E-09   | 0.77189706 | 7.62E-38 | 0.5859379  | 1.93E-18   |
| 2.64E-35   | -0.5526079 | 3.49E-16   | 0.92177903 | 3.18E-77 | 0.69233995 | 9.83E-28   |
| 3.45E-37   | -0.2635214 | 0.00028979 | 0.59492153 | 4.29E-19 | 0.11972295 | 0.10454348 |
| 4.41E-50   | -0.6038989 | 9.08E-20   | 0.91827556 | 1.49E-75 | 0.48033063 | 4.55E-12   |
| 5.61E-42   | 0.715992   | 2.24E-30   | -0.734648  | 1.17E-32 | -0.5604695 | 1.08E-16   |
| 4.43E-16   | 0.23643391 | 0.00119481 | -0.411652  | 5.84E-09 | -0.3201452 | 8.90E-06   |
| 1.94E-32   | -0.4858862 | 2.37E-12   | 0.93306277 | 3.47E-83 | 0.63403146 | 3.41E-22   |
| 4.32E-11   | 0.33136968 | 4.08E-06   | -0.5257114 | 1.55E-14 | -0.3671192 | 2.75E-07   |
| 9.99E-29   | -0.371674  | 1.90E-07   | 0.62684731 | 1.37E-21 | 0.15188393 | 0.03903367 |
| 2.25E-07   | -0.2450258 | 0.00077516 | 0.37592207 | 1.34E-07 | -0.0079659 | 0.91430131 |
| 2.30E-14   | -0.5664459 | 4.33E-17   | 0.53819869 | 2.77E-15 | 0.24370375 | 0.00082935 |
| 7.50E-24   | 0.76998311 | 1.49E-37   | -0.6176121 | 7.71E-21 | -0.5974843 | 2.77E-19   |
| 1.23E-40   | 0.33128723 | 4.10E-06   | -0.6943224 | 6.04E-28 | -0.4899024 | 1.47E-12   |
| 1.20E-27   | 0.29752951 | 3.91E-05   | -0.6026428 | 1.13E-19 | -0.448823  | 1.48E-10   |
| 5.99E-58   | 0.54767162 | 7.18E-16   | -0.8230637 | 7.80E-47 | -0.4646344 | 2.70E-11   |
| 5.64E-07   | 0.26969595 | 0.00020528 | -0.451509  | 1.11E-10 | -0.6788551 | 2.44E-26   |
| 0.00057162 | -0.2486167 | 0.000644   | 0.50263041 | 3.09E-13 | 0.61796667 | 7.22E-21   |
| 1.26E-38   | 0.79581321 | 1.00E-41   | -0.7570436 | 1.16E-35 | -0.6064255 | 5.82E-20   |
| 6.58E-43   | -0.4164906 | 3.71E-09   | 0.80925474 | 3.83E-44 | 0.61375219 | 1.56E-20   |
| 1.03E-06   | 0.33540228 | 3.06E-06   | -0.6856795 | 4.91E-27 | -0.1657127 | 0.02417929 |
| 8.38E-27   | -0.5139463 | 7.32E-14   | 0.85220311 | 2.27E-53 | 0.42805095 | 1.22E-09   |
| 6.41E-08   | -0.4258874 | 1.51E-09   | 0.69821956 | 2.29E-28 | 0.54885246 | 6.05E-16   |
| 3.75E-43   | 0.40058188 | 1.60E-08   | -0.7640491 | 1.13E-36 | -0.4687792 | 1.70E-11   |

|            |            |            |            |          |            |            |
|------------|------------|------------|------------|----------|------------|------------|
| 1.69E-49   | -0.3985085 | 1.93E-08   | 0.60349572 | 9.75E-20 | 0.3728714  | 1.72E-07   |
| 9.40E-11   | 0.7910747  | 6.45E-41   | -0.645738  | 3.29E-23 | -0.3785894 | 1.07E-07   |
| 3.16E-21   | -0.3960886 | 2.39E-08   | 0.49768646 | 5.71E-13 | 0.02787065 | 0.70648157 |
| 4.40E-58   | -0.5072935 | 1.72E-13   | 0.74559774 | 4.35E-34 | 0.51298136 | 8.30E-14   |
| 7.33E-25   | -0.5378799 | 2.90E-15   | 0.87272641 | 6.97E-59 | 0.80981244 | 3.01E-44   |
| 0.00420266 | 0.14921349 | 0.04264915 | -0.4294515 | 1.06E-09 | -0.5568334 | 1.86E-16   |
| 0.00818301 | 0.24510302 | 0.0007721  | -0.4832086 | 3.25E-12 | 0.10223807 | 0.16611538 |
| 1.13E-35   | -0.3518281 | 9.07E-07   | 0.62649392 | 1.46E-21 | 0.29728593 | 3.97E-05   |
| 0.34180301 | -0.1925674 | 0.00863766 | 0.3785926  | 1.07E-07 | 0.59331563 | 5.63E-19   |
| 4.25E-08   | -0.430006  | 1.01E-09   | 0.71416866 | 3.66E-30 | 0.24579912 | 0.000745   |
| 1.35E-30   | 0.3670269  | 2.77E-07   | -0.7572577 | 1.08E-35 | -0.446407  | 1.91E-10   |
| 5.90E-12   | -0.5105368 | 1.14E-13   | 0.72318652 | 3.11E-31 | 0.72146021 | 5.03E-31   |
| 1.04E-09   | 0.27764755 | 0.00013007 | -0.6224006 | 3.16E-21 | -0.5396753 | 2.25E-15   |
| 4.15E-40   | -0.3539731 | 7.70E-07   | 0.61264669 | 1.91E-20 | 0.33837855 | 2.47E-06   |
| 1.21E-22   | -0.5175321 | 4.59E-14   | 0.85060247 | 5.64E-53 | 0.60546991 | 6.89E-20   |
| 3.15E-28   | -0.1924402 | 0.00868262 | 0.84104339 | 1.03E-50 | 0.54579854 | 9.41E-16   |
| 1.03E-14   | 0.4949967  | 7.94E-13   | -0.7280366 | 7.94E-32 | -0.2165255 | 0.00307336 |
| 4.55E-34   | -0.4728767 | 1.07E-11   | 0.70221318 | 8.34E-29 | 0.21406406 | 0.00343523 |
| 5.53E-09   | -0.5789787 | 6.00E-18   | 0.69387562 | 6.74E-28 | 0.67152403 | 1.30E-25   |
| 6.17E-13   | 0.78235671 | 1.76E-39   | -0.5814863 | 4.00E-18 | -0.3926583 | 3.24E-08   |
| 8.13E-34   | 0.41319783 | 5.06E-09   | -0.8328922 | 6.76E-49 | -0.6492986 | 1.58E-23   |
| 1.03E-15   | -0.1946342 | 0.00793541 | 0.68389934 | 7.49E-27 | 0.25475893 | 0.00046608 |
| 1.29E-23   | 0.67945175 | 2.12E-26   | -0.5675952 | 3.62E-17 | -0.3442646 | 1.60E-06   |
| 1.95E-13   | -0.4551733 | 7.55E-11   | 0.64865197 | 1.81E-23 | 0.2774117  | 0.00013187 |
| 0.01507775 | 0.3527301  | 8.46E-07   | -0.3180188 | 1.03E-05 | -0.6103898 | 2.87E-20   |
| 3.44E-25   | -0.4313339 | 8.82E-10   | 0.70924953 | 1.35E-29 | 0.64386911 | 4.81E-23   |
| 1.25E-42   | 0.24584205 | 0.00074336 | -0.6170367 | 8.57E-21 | -0.3269758 | 5.55E-06   |
| 1.58E-24   | -0.585515  | 2.07E-18   | 0.88869696 | 7.00E-64 | 0.78103148 | 2.87E-39   |
| 2.92E-41   | 0.54840317 | 6.45E-16   | -0.8871305 | 2.33E-63 | -0.5916618 | 7.44E-19   |
| 1.36E-27   | -0.5802456 | 4.89E-18   | 0.68639467 | 4.14E-27 | 0.52883293 | 1.01E-14   |
| 1.94E-30   | -0.3615011 | 4.29E-07   | 0.59939486 | 1.99E-19 | 0.20589997 | 0.00492724 |
| 1.10E-38   | -0.5423855 | 1.53E-15   | 0.81841802 | 6.65E-46 | 0.30547732 | 2.35E-05   |
| 1.17E-50   | -0.5551888 | 2.38E-16   | 0.81846244 | 6.52E-46 | 0.56755957 | 3.64E-17   |
| 3.43E-28   | 0.33478822 | 3.19E-06   | -0.6340392 | 3.41E-22 | -0.3673408 | 2.70E-07   |
| 1.47E-33   | 0.57467087 | 1.19E-17   | -0.7145413 | 3.32E-30 | -0.354684  | 7.29E-07   |
| 1.78E-49   | 0.37945175 | 1.00E-07   | -0.6960608 | 3.93E-28 | -0.4825287 | 3.52E-12   |
| 1.95E-05   | -0.4532393 | 9.28E-11   | 0.6390857  | 1.26E-22 | 0.44132314 | 3.22E-10   |
| 7.93E-25   | -0.3291797 | 4.76E-06   | 0.76925264 | 1.92E-37 | 0.28003674 | 0.0001131  |
| 2.45E-47   | -0.5245668 | 1.80E-14   | 0.79059202 | 7.78E-41 | 0.31022146 | 1.73E-05   |
| 0.00021317 | 0.39344497 | 3.02E-08   | -0.5689023 | 2.96E-17 | -0.5880797 | 1.35E-18   |
| 1.96E-35   | -0.4814046 | 4.01E-12   | 0.8760577  | 7.22E-60 | 0.54803556 | 6.81E-16   |
| 6.59E-25   | -0.2354462 | 0.00125452 | 0.7570529  | 1.15E-35 | 0.63171161 | 5.36E-22   |
| 0.00297162 | -0.4401221 | 3.64E-10   | 0.52742995 | 1.23E-14 | 0.4362897  | 5.37E-10   |
| 4.35E-11   | -0.2224273 | 0.00234197 | 0.46169503 | 3.72E-11 | 0.3588965  | 5.26E-07   |
| 5.33E-33   | -0.5372004 | 3.19E-15   | 0.88723595 | 2.15E-63 | 0.43037472 | 9.70E-10   |
| 2.34E-43   | -0.4949289 | 8.00E-13   | 0.8089402  | 4.39E-44 | 0.66561768 | 4.86E-25   |



|            |            |            |            |          |            |            |
|------------|------------|------------|------------|----------|------------|------------|
| 4.43E-27   | 0.17811812 | 0.01527986 | -0.7126224 | 5.54E-30 | -0.5052379 | 2.23E-13   |
| 4.06E-20   | -0.3505952 | 9.96E-07   | 0.75233121 | 5.27E-35 | 0.25348827 | 0.00049865 |
| 2.64E-16   | -0.3732779 | 1.67E-07   | 0.5410412  | 1.86E-15 | 0.09843321 | 0.1825313  |
| 2.32E-18   | 0.44067112 | 3.44E-10   | -0.728674  | 6.62E-32 | -0.5715528 | 1.95E-17   |
| 1.16E-23   | 0.38908536 | 4.41E-08   | -0.7156024 | 2.49E-30 | -0.6603978 | 1.52E-24   |
| 9.86E-22   | 0.47590345 | 7.58E-12   | -0.829389  | 3.80E-48 | -0.6605578 | 1.46E-24   |
| 2.48E-12   | -0.4052202 | 1.06E-08   | 0.77497973 | 2.56E-38 | 0.77437646 | 3.18E-38   |
| 6.59E-24   | -0.5669551 | 4.00E-17   | 0.84814668 | 2.23E-52 | 0.40160696 | 1.46E-08   |
| 1.08E-08   | -0.3928398 | 3.18E-08   | 0.67634806 | 4.35E-26 | 0.54437664 | 1.15E-15   |
| 6.61E-28   | -0.4744041 | 9.00E-12   | 0.86227533 | 5.78E-56 | 0.7587611  | 6.59E-36   |
| 0.00585135 | 0.26500273 | 0.00026699 | -0.4846886 | 2.73E-12 | -0.4932086 | 9.86E-13   |
| 2.21E-12   | 0.14972929 | 0.04192971 | -0.6181118 | 7.03E-21 | -0.3927677 | 3.20E-08   |
| 4.06E-31   | -0.4831071 | 3.29E-12   | 0.71987209 | 7.79E-31 | 0.66015317 | 1.60E-24   |
| 1.64E-18   | -0.5006703 | 3.95E-13   | 0.78223267 | 1.84E-39 | 0.43728498 | 4.86E-10   |
| 1.27E-20   | 0.42034238 | 2.57E-09   | -0.5557948 | 2.18E-16 | -0.0643631 | 0.38408067 |
| 1.65E-21   | -0.558481  | 1.46E-16   | 0.86619134 | 4.98E-57 | 0.49428188 | 8.66E-13   |
| 2.12E-26   | 0.58320957 | 3.02E-18   | -0.8644907 | 1.46E-56 | -0.6091045 | 3.61E-20   |
| 9.39E-104  | -0.5230816 | 2.20E-14   | 0.84735416 | 3.45E-52 | 0.5643488  | 5.98E-17   |
| 0.02091442 | 0.60096008 | 1.52E-19   | -0.3768355 | 1.24E-07 | -0.3892969 | 4.33E-08   |
| 6.68E-07   | 0.75096924 | 8.13E-35   | -0.711489  | 7.49E-30 | -0.3386897 | 2.41E-06   |
| 4.85E-37   | -0.1727381 | 0.01870944 | 0.64421948 | 4.48E-23 | 0.34425788 | 1.60E-06   |
| 2.81E-15   | -0.5526853 | 3.45E-16   | 0.85359991 | 1.02E-53 | 0.46890205 | 1.68E-11   |
| 1.97E-34   | 0.49618626 | 6.86E-13   | -0.8212162 | 1.84E-46 | -0.6329257 | 4.23E-22   |
| 3.21E-23   | 0.6985726  | 2.10E-28   | -0.7371439 | 5.62E-33 | -0.4824449 | 3.55E-12   |
| 2.05E-40   | 0.37698892 | 1.23E-07   | -0.5902626 | 9.41E-19 | -0.3627583 | 3.88E-07   |
| 1.14E-06   | -0.4222632 | 2.14E-09   | 0.69838154 | 2.20E-28 | 0.65816481 | 2.45E-24   |
| 5.39E-38   | -0.4437655 | 2.51E-10   | 0.91916167 | 5.73E-76 | 0.56520863 | 5.24E-17   |
| 7.43E-07   | -0.280588  | 0.00010949 | 0.71333356 | 4.58E-30 | 0.47379326 | 9.65E-12   |
| 6.25E-29   | -0.587659  | 1.45E-18   | 0.86552994 | 7.58E-57 | 0.80442047 | 2.98E-43   |
| 2.23E-12   | 0.55228066 | 3.66E-16   | -0.546774  | 8.17E-16 | -0.5732019 | 1.51E-17   |
| 8.17E-29   | -0.5620171 | 8.53E-17   | 0.82981377 | 3.09E-48 | 0.85308542 | 1.37E-53   |
| 2.12E-15   | -0.3892197 | 4.36E-08   | 0.74036811 | 2.14E-33 | 0.3482911  | 1.18E-06   |
| 3.02E-32   | -0.3608009 | 4.53E-07   | 0.80247406 | 6.70E-43 | 0.53606212 | 3.74E-15   |
| 1.26E-38   | 0.71971364 | 8.14E-31   | -0.7838543 | 1.01E-39 | -0.7138996 | 3.94E-30   |
| 0.00254965 | -0.4162703 | 3.79E-09   | 0.61534967 | 1.17E-20 | 0.38741303 | 5.10E-08   |
| 1.75E-11   | -0.4753875 | 8.04E-12   | 0.77428792 | 3.28E-38 | 0.50753392 | 1.67E-13   |
| 1.36E-50   | 0.43045845 | 9.62E-10   | -0.8251454 | 2.93E-47 | -0.4717473 | 1.22E-11   |
| 1.11E-16   | 0.51005735 | 1.21E-13   | -0.8611692 | 1.14E-55 | -0.599475  | 1.96E-19   |
| 1.53E-09   | -0.3126514 | 1.47E-05   | 0.5193622  | 3.60E-14 | 0.66622537 | 4.25E-25   |
| 7.64E-62   | -0.3740422 | 1.57E-07   | 0.75561172 | 1.84E-35 | 0.40749025 | 8.58E-09   |
| 1.28E-16   | 0.59448276 | 4.62E-19   | -0.6926609 | 9.08E-28 | -0.6489132 | 1.71E-23   |
| 2.68E-37   | 0.27908855 | 0.00011957 | -0.6322672 | 4.81E-22 | -0.4384007 | 4.34E-10   |
| 2.35E-21   | -0.5081064 | 1.55E-13   | 0.8635722  | 2.59E-56 | 0.64484503 | 3.95E-23   |
| 8.80E-34   | -0.5351229 | 4.26E-15   | 0.9395099  | 4.41E-87 | 0.67587478 | 4.85E-26   |
| 3.29E-25   | 0.29539275 | 4.46E-05   | -0.7294716 | 5.27E-32 | -0.6010762 | 1.49E-19   |
| 4.75E-36   | -0.6292386 | 8.64E-22   | 0.93301174 | 3.71E-83 | 0.66201234 | 1.07E-24   |

|            |            |            |            |           |            |            |
|------------|------------|------------|------------|-----------|------------|------------|
| 9.83E-13   | -0.4496056 | 1.36E-10   | 0.75332277 | 3.84E-35  | 0.33660701 | 2.80E-06   |
| 1.17E-08   | -0.4687443 | 1.71E-11   | 0.75072754 | 8.77E-35  | 0.65461541 | 5.21E-24   |
| 9.68E-42   | -0.5717884 | 1.88E-17   | 0.86000486 | 2.32E-55  | 0.62387024 | 2.40E-21   |
| 1.84E-22   | -0.5710756 | 2.11E-17   | 0.84085851 | 1.14E-50  | 0.66745348 | 3.24E-25   |
| 0.00058113 | -0.3663769 | 2.91E-07   | 0.4083839  | 7.90E-09  | 0.72220636 | 4.09E-31   |
| 2.79E-38   | 0.42421792 | 1.77E-09   | -0.8619233 | 7.18E-56  | -0.5131541 | 8.11E-14   |
| 7.67E-11   | -0.4379344 | 4.55E-10   | 0.71571476 | 2.42E-30  | 0.44023819 | 3.60E-10   |
| 4.90E-26   | -0.5265267 | 1.38E-14   | 0.89179184 | 6.14E-65  | 0.58586552 | 1.95E-18   |
| 3.96E-13   | 0.32332131 | 7.16E-06   | -0.6028031 | 1.10E-19  | -0.689357  | 2.03E-27   |
| 0.02525018 | -0.4112471 | 6.06E-09   | 0.39430711 | 2.80E-08  | 0.55057231 | 4.70E-16   |
| 4.32E-13   | 0.15809954 | 0.03160685 | -0.5359851 | 3.78E-15  | -0.656947  | 3.18E-24   |
| 1.73E-26   | 0.41305214 | 5.13E-09   | -0.7019971 | 8.82E-29  | -0.6207796 | 4.28E-21   |
| 1.27E-19   | -0.5674711 | 3.69E-17   | 0.86668201 | 3.65E-57  | 0.76037426 | 3.87E-36   |
| 3.04E-17   | 0.1452418  | 0.04854288 | -0.4659827 | 2.32E-11  | 0.0446415  | 0.5462589  |
| 7.98E-33   | -0.5518396 | 3.91E-16   | 0.92473627 | 1.07E-78  | 0.76349572 | 1.37E-36   |
| 1.57E-17   | -0.5199302 | 3.34E-14   | 0.8304821  | 2.23E-48  | 0.57601703 | 9.64E-18   |
| 2.11E-11   | 0.24766654 | 0.00067656 | -0.5074189 | 1.69E-13  | -0.4317542 | 8.46E-10   |
| 2.55E-11   | -0.5569151 | 1.84E-16   | 0.80870659 | 4.85E-44  | 0.51689548 | 4.99E-14   |
| 2.25E-11   | -0.4722108 | 1.15E-11   | 0.74737667 | 2.51E-34  | 0.75258334 | 4.87E-35   |
| 3.71E-07   | -0.3430936 | 1.75E-06   | 0.4995722  | 4.52E-13  | 0.74745479 | 2.45E-34   |
| 4.12E-14   | -0.4324926 | 7.86E-10   | 0.82694845 | 1.24E-47  | 0.65327612 | 6.90E-24   |
| 1.11E-32   | -0.5284376 | 1.07E-14   | 0.76289023 | 1.67E-36  | 0.6692188  | 2.19E-25   |
| 0.00011012 | -0.2691357 | 0.00021188 | 0.55733708 | 1.73E-16  | 0.05776121 | 0.43482323 |
| 2.55E-28   | -0.4825522 | 3.51E-12   | 0.9137156  | 1.73E-73  | 0.48327093 | 3.23E-12   |
| 1.53E-09   | -0.4711955 | 1.30E-11   | 0.59824094 | 2.43E-19  | 0.22970476 | 0.00165909 |
| 5.37E-24   | 0.40273322 | 1.32E-08   | -0.6655758 | 4.90E-25  | -0.2139821 | 0.00344792 |
| 4.38E-08   | -0.2444016 | 0.00080033 | 0.69398604 | 6.56E-28  | 0.50061921 | 3.97E-13   |
| 2.76E-20   | -0.4441043 | 2.42E-10   | 0.7151621  | 2.81E-30  | 0.380114   | 9.46E-08   |
| 0.00069645 | 0.35997393 | 4.84E-07   | -0.5861404 | 1.87E-18  | -0.3347329 | 3.21E-06   |
| 2.23E-08   | 0.36741309 | 2.68E-07   | -0.6273004 | 1.25E-21  | -0.670908  | 1.50E-25   |
| 0.0731421  | 0.35917491 | 5.15E-07   | -0.516586  | 5.19E-14  | -0.5178136 | 4.42E-14   |
| 1.52E-24   | -0.4931426 | 9.94E-13   | 0.84613914 | 6.72E-52  | 0.68031295 | 1.74E-26   |
| 1.16E-26   | 0.29977892 | 3.39E-05   | -0.7181604 | 1.25E-30  | -0.3350205 | 3.14E-06   |
| 1.20E-42   | 0.44714181 | 1.76E-10   | -0.7803226 | 3.72E-39  | -0.3635925 | 3.64E-07   |
| 8.84E-36   | -0.3230001 | 7.32E-06   | 0.74159902 | 1.48E-33  | 0.22237617 | 0.00234755 |
| 1.91E-53   | 0.29360177 | 4.99E-05   | -0.6924763 | 9.50E-28  | -0.6153892 | 1.16E-20   |
| 4.44E-47   | -0.5758176 | 9.96E-18   | 0.96215686 | 2.87E-105 | 0.62027399 | 4.71E-21   |
| 1.87E-31   | -0.5215886 | 2.68E-14   | 0.90242257 | 7.87E-69  | 0.637841   | 1.61E-22   |
| 4.26E-26   | -0.3582788 | 5.52E-07   | 0.48642689 | 2.22E-12  | 0.06949891 | 0.34720853 |
| 9.07E-33   | 0.24131283 | 0.00093629 | -0.7331525 | 1.82E-32  | -0.4355679 | 5.78E-10   |
| 4.24E-07   | 0.26037236 | 0.00034441 | -0.4333111 | 7.24E-10  | 0.19431005 | 0.00804207 |
| 5.95E-22   | 0.57221058 | 1.76E-17   | -0.6818334 | 1.22E-26  | -0.7112685 | 7.94E-30   |
| 0.00070883 | -0.3410367 | 2.03E-06   | 0.61883641 | 6.15E-21  | 0.51940011 | 3.59E-14   |
| 1.83E-22   | 0.36568444 | 3.08E-07   | -0.7559164 | 1.67E-35  | -0.3134893 | 1.39E-05   |
| 3.41E-38   | 0.39019426 | 4.01E-08   | -0.7842617 | 8.65E-40  | -0.6031517 | 1.04E-19   |
| 1.36E-33   | 0.43314312 | 7.36E-10   | -0.8453102 | 1.06E-51  | -0.7353471 | 9.56E-33   |

|            |            |            |            |            |            |            |
|------------|------------|------------|------------|------------|------------|------------|
| 4.46E-46   | -0.5978863 | 2.58E-19   | 0.90289568 | 5.16E-69   | 0.59468961 | 4.46E-19   |
| 3.65E-18   | 0.53785326 | 2.91E-15   | -0.8798754 | 4.94E-61   | -0.4973564 | 5.94E-13   |
| 1.21E-48   | -0.3529905 | 8.30E-07   | 0.56838663 | 3.21E-17   | 0.25133351 | 0.00055873 |
| 2.18E-17   | 0.35453044 | 7.37E-07   | -0.5181729 | 4.22E-14   | -0.5757951 | 9.99E-18   |
| 0.76094461 | 0.16106696 | 0.02850833 | -0.3115664 | 1.58E-05   | -0.4304781 | 9.60E-10   |
| 4.61E-20   | -0.323543  | 7.05E-06   | 0.5414359  | 1.76E-15   | 0.49320675 | 9.86E-13   |
| 9.17E-07   | 0.46078673 | 4.11E-11   | -0.534106  | 4.91E-15   | -0.4352262 | 5.98E-10   |
| 5.07E-46   | 0.29436921 | 4.76E-05   | -0.6940351 | 6.48E-28   | -0.5843432 | 2.51E-18   |
| 2.08E-21   | 0.35883804 | 5.28E-07   | -0.8027275 | 6.03E-43   | -0.6116305 | 2.29E-20   |
| 3.03E-26   | 0.3964618  | 2.32E-08   | -0.7740199 | 3.61E-38   | -0.7637658 | 1.25E-36   |
| 4.62E-15   | -0.0410877 | 0.57868977 | 0.46108581 | 3.98E-11   | 0.60085043 | 1.55E-19   |
| 2.20E-80   | -0.5447961 | 1.09E-15   | 0.93659128 | 2.88E-85   | 0.57692137 | 8.35E-18   |
| 4.26E-16   | 0.26193967 | 0.00031613 | -0.7337726 | 1.52E-32   | -0.4410049 | 3.33E-10   |
| 5.83E-24   | -0.2580134 | 0.00039142 | 0.66370858 | 7.38E-25   | 0.13397182 | 0.06905379 |
| 1.23E-17   | 0.56349136 | 6.81E-17   | -0.6121191 | 2.10E-20   | -0.6204507 | 4.55E-21   |
| 8.99E-77   | -0.5670268 | 3.96E-17   | 0.90743108 | 8.02E-71   | 0.63827812 | 1.48E-22   |
| 2.59E-49   | -0.5730083 | 1.55E-17   | 0.86471562 | 1.27E-56   | 0.42127464 | 2.35E-09   |
| 6.33E-34   | 0.54071997 | 1.94E-15   | -0.8401438 | 1.66E-50   | -0.6336435 | 3.68E-22   |
| 7.63E-06   | 0.16009262 | 0.02949579 | -0.3234113 | 7.11E-06   | -0.3132107 | 1.42E-05   |
| 2.92E-15   | 0.29621618 | 4.24E-05   | -0.4341323 | 6.67E-10   | -0.4764638 | 7.11E-12   |
| 0.00114808 | 0.54802023 | 6.82E-16   | -0.451992  | 1.06E-10   | -0.61542   | 1.15E-20   |
| 4.82E-28   | -0.3216837 | 8.01E-06   | 0.72667545 | 1.17E-31   | 0.28272287 | 9.65E-05   |
| 7.60E-07   | -0.3772442 | 1.20E-07   | 0.67596853 | 4.75E-26   | 0.36652821 | 2.88E-07   |
| 2.31E-37   | -0.5445159 | 1.13E-15   | 0.89192761 | 5.51E-65   | 0.50923253 | 1.34E-13   |
| 0.00034828 | -0.1006219 | 0.17294849 | 0.21628901 | 0.00310656 | -0.1598193 | 0.02977797 |
| 0.00955374 | -0.3547895 | 7.23E-07   | 0.56957531 | 2.66E-17   | 0.5829648  | 3.14E-18   |
| 2.52E-24   | -0.5784927 | 6.49E-18   | 0.88043173 | 3.32E-61   | 0.44794422 | 1.62E-10   |
| 3.08E-51   | 0.45251884 | 1.00E-10   | -0.9148672 | 5.34E-74   | -0.665396  | 5.10E-25   |
| 4.18E-19   | 0.38783067 | 4.92E-08   | -0.7557645 | 1.75E-35   | -0.1738689 | 0.01793778 |
| 8.57E-23   | 0.43368658 | 6.98E-10   | -0.7922647 | 4.06E-41   | -0.7024355 | 7.88E-29   |
| 2.56E-17   | -0.5234009 | 2.11E-14   | 0.85060276 | 5.64E-53   | 0.47952125 | 5.00E-12   |
| 9.24E-30   | 0.3615046  | 4.29E-07   | -0.8654612 | 7.92E-57   | -0.6364947 | 2.10E-22   |
| 9.49E-40   | 0.68894454 | 2.24E-27   | -0.7090401 | 1.43E-29   | -0.4475284 | 1.69E-10   |
| 1.12E-31   | -0.5037134 | 2.70E-13   | 0.86128528 | 1.06E-55   | 0.87507346 | 1.42E-59   |
| 2.40E-12   | 0.3332558  | 3.57E-06   | -0.7272369 | 9.96E-32   | -0.2207118 | 0.00253629 |
| 2.28E-24   | -0.4357726 | 5.66E-10   | 0.80890423 | 4.46E-44   | 0.32783772 | 5.23E-06   |
| 2.06E-14   | -0.3979063 | 2.04E-08   | 0.66821209 | 2.74E-25   | 0.26537224 | 0.00026156 |
| 1.30E-43   | -0.4816741 | 3.89E-12   | 0.84693084 | 4.35E-52   | 0.58831593 | 1.30E-18   |
| 5.24E-12   | 0.46668623 | 2.15E-11   | -0.7364022 | 7.00E-33   | -0.4793528 | 5.10E-12   |
| 1.38E-16   | 0.36594519 | 3.02E-07   | -0.6602553 | 1.56E-24   | -0.0604375 | 0.41380602 |
| 5.36E-32   | 0.43053668 | 9.54E-10   | -0.8069615 | 1.02E-43   | -0.5756219 | 1.03E-17   |
| 1.62E-12   | 0.17173629 | 0.01941699 | -0.525058  | 1.69E-14   | -0.2472095 | 0.00069275 |
| 3.69E-10   | 0.23324502 | 0.00139753 | -0.4644747 | 2.74E-11   | -0.3238655 | 6.89E-06   |
| 1.99E-07   | 0.30122825 | 3.09E-05   | -0.5276741 | 1.19E-14   | -0.624999  | 1.94E-21   |
| 1.55E-19   | 0.36544015 | 3.14E-07   | -0.663052  | 8.52E-25   | -0.7144503 | 3.40E-30   |
| 6.20E-16   | -0.4751568 | 8.26E-12   | 0.78483096 | 6.99E-40   | 0.43527949 | 5.95E-10   |

|            |            |            |            |            |            |            |
|------------|------------|------------|------------|------------|------------|------------|
| 1.44E-44   | 0.51265089 | 8.66E-14   | -0.7653451 | 7.31E-37   | -0.5461479 | 8.95E-16   |
| 2.57E-35   | 0.25897543 | 0.00037157 | -0.6854483 | 5.19E-27   | -0.4487607 | 1.49E-10   |
| 5.36E-12   | -0.5497846 | 5.28E-16   | 0.80493769 | 2.40E-43   | 0.6317841  | 5.29E-22   |
| 0.87546808 | 0.25777983 | 0.00039638 | -0.2793789 | 0.00011755 | -0.1285863 | 0.08109684 |
| 7.21E-27   | 0.45189334 | 1.07E-10   | -0.7547668 | 2.42E-35   | -0.7014964 | 1.00E-28   |
| 3.02E-36   | 0.46068547 | 4.16E-11   | -0.750522  | 9.36E-35   | -0.5422187 | 1.57E-15   |
| 5.42E-11   | -0.4596036 | 4.68E-11   | 0.7417093  | 1.43E-33   | 0.34295863 | 1.76E-06   |
| 5.05E-19   | -0.25113   | 0.00056473 | 0.68163767 | 1.28E-26   | 0.2835687  | 9.18E-05   |
| 5.94E-34   | 0.27111242 | 0.00018945 | -0.6745522 | 6.56E-26   | -0.5647769 | 5.60E-17   |
| 0.02177845 | 0.30583179 | 2.30E-05   | -0.5666067 | 4.22E-17   | -0.3181555 | 1.02E-05   |
| 0.00011798 | 0.31873055 | 9.79E-06   | -0.6323905 | 4.70E-22   | -0.4395311 | 3.87E-10   |
| 2.24E-14   | 0.48541643 | 2.51E-12   | -0.7211325 | 5.51E-31   | -0.6090201 | 3.67E-20   |
| 9.72E-31   | -0.3597151 | 4.93E-07   | 0.78702043 | 3.06E-40   | 0.54476271 | 1.09E-15   |
| 3.25E-24   | 0.37920603 | 1.02E-07   | -0.7288922 | 6.22E-32   | -0.4957381 | 7.25E-13   |
| 3.74E-28   | 0.53336023 | 5.44E-15   | -0.8600637 | 2.23E-55   | -0.5503796 | 4.84E-16   |
| 0.0031611  | 0.41699421 | 3.54E-09   | -0.4801393 | 4.65E-12   | -0.4593276 | 4.82E-11   |
| 7.29E-21   | -0.45848   | 5.28E-11   | 0.68057606 | 1.64E-26   | 0.53431042 | 4.77E-15   |
| 1.87E-15   | -0.4812024 | 4.11E-12   | 0.74405619 | 6.99E-34   | 0.15617984 | 0.03376036 |
| 5.05E-10   | 0.32345996 | 7.09E-06   | -0.5571148 | 1.79E-16   | -0.4064212 | 9.46E-09   |
| 1.91E-11   | -0.5848966 | 2.29E-18   | 0.50487212 | 2.33E-13   | 0.41963056 | 2.75E-09   |
| 6.05E-11   | -0.2759613 | 0.00014345 | 0.57411797 | 1.30E-17   | 0.10723945 | 0.14624563 |
| 4.69E-23   | -0.4172689 | 3.45E-09   | 0.67560722 | 5.16E-26   | 0.7528849  | 4.42E-35   |
| 0.03557044 | 0.4035669  | 1.23E-08   | -0.5454967 | 9.82E-16   | -0.4340385 | 6.73E-10   |
| 2.25E-29   | -0.4979145 | 5.55E-13   | 0.7347585  | 1.14E-32   | 0.30286738 | 2.79E-05   |
| 1.02E-08   | 0.3838725  | 6.89E-08   | -0.5424384 | 1.52E-15   | -0.5518836 | 3.88E-16   |
| 3.82E-16   | -0.3214804 | 8.12E-06   | 0.74273232 | 1.05E-33   | 0.24700442 | 0.00070013 |
| 1.36E-08   | 0.41766645 | 3.32E-09   | -0.6759416 | 4.78E-26   | -0.504615  | 2.41E-13   |
| 1.08E-33   | -0.476422  | 7.15E-12   | 0.85725446 | 1.20E-54   | 0.58242044 | 3.44E-18   |
| 1.68E-11   | -0.3865689 | 5.48E-08   | 0.72430241 | 2.28E-31   | 0.74642656 | 3.37E-34   |
| 2.85E-06   | -0.20536   | 0.0050439  | 0.48137344 | 4.03E-12   | 0.17504083 | 0.01716733 |
| 3.05E-76   | -0.4734104 | 1.01E-11   | 0.85945716 | 3.22E-55   | 0.5063188  | 1.94E-13   |
| 1.75E-09   | 0.286287   | 7.80E-05   | -0.6325672 | 4.54E-22   | -0.559258  | 1.30E-16   |
| 0.00665643 | -0.380995  | 8.79E-08   | 0.55037167 | 4.84E-16   | 0.58020982 | 4.92E-18   |
| 1.24E-17   | -0.4592357 | 4.87E-11   | 0.70427203 | 4.93E-29   | 0.37482939 | 1.47E-07   |
| 3.71E-15   | -0.3768146 | 1.25E-07   | 0.65164686 | 9.71E-24   | 0.37788422 | 1.14E-07   |
| 3.00E-11   | -0.5239332 | 1.96E-14   | 0.7532636  | 3.92E-35   | 0.64231806 | 6.58E-23   |
| 6.86E-23   | 0.41607001 | 3.86E-09   | -0.7952995 | 1.23E-41   | -0.5563752 | 2.00E-16   |
| 1.54E-29   | -0.4655936 | 2.42E-11   | 0.82769477 | 8.64E-48   | 0.32580827 | 6.02E-06   |
| 1.84E-13   | 0.34716243 | 1.29E-06   | -0.7189483 | 1.00E-30   | -0.4281814 | 1.20E-09   |
| 3.96E-26   | -0.330114  | 4.46E-06   | 0.52209895 | 2.51E-14   | 0.11191645 | 0.12934757 |
| 1.30E-08   | 0.24971888 | 0.00060806 | -0.4197592 | 2.72E-09   | -0.415275  | 4.16E-09   |
| 6.25E-07   | 0.24294808 | 0.00086187 | -0.4116792 | 5.82E-09   | -0.452829  | 9.69E-11   |
| 0.36338012 | -0.3336411 | 3.47E-06   | 0.4150484  | 4.25E-09   | 0.10741664 | 0.14557633 |
| 1.58E-19   | 0.37978408 | 9.73E-08   | -0.7251302 | 1.81E-31   | -0.5044306 | 2.47E-13   |
| 1.97E-09   | -0.4287049 | 1.14E-09   | 0.77356078 | 4.24E-38   | 0.62988815 | 7.63E-22   |
| 1.24E-24   | -0.2569201 | 0.00041516 | 0.54982403 | 5.25E-16   | 0.66548772 | 5.00E-25   |

|            |            |            |            |            |            |            |
|------------|------------|------------|------------|------------|------------|------------|
| 2.22E-12   | -0.2486342 | 0.00064342 | 0.48229707 | 3.62E-12   | 0.12844968 | 0.08142299 |
| 4.39E-33   | -0.4113761 | 5.99E-09   | 0.89283705 | 2.65E-65   | 0.42594744 | 1.50E-09   |
| 3.52E-11   | -0.1863027 | 0.01111428 | 0.33144731 | 4.05E-06   | -0.0968067 | 0.18990154 |
| 1.29E-16   | -0.318268  | 1.01E-05   | 0.62724599 | 1.27E-21   | 0.04115361 | 0.57808001 |
| 1.65E-28   | -0.5544116 | 2.67E-16   | 0.91654958 | 9.31E-75   | 0.53368121 | 5.20E-15   |
| 1.42E-10   | -0.2982167 | 3.74E-05   | 0.68300675 | 9.25E-27   | 0.67916378 | 2.27E-26   |
| 3.77E-06   | 0.55796525 | 1.57E-16   | -0.6748357 | 6.15E-26   | -0.3682642 | 2.50E-07   |
| 1.24E-47   | -0.5815486 | 3.96E-18   | 0.97380102 | 1.19E-119  | 0.74182676 | 1.38E-33   |
| 2.33E-29   | -0.3502882 | 1.02E-06   | 0.79803523 | 4.11E-42   | 0.27103986 | 0.00019023 |
| 5.84E-13   | -0.5366745 | 3.43E-15   | 0.71682044 | 1.79E-30   | 0.7325619  | 2.16E-32   |
| 0.00137076 | -0.4336095 | 7.03E-10   | 0.41141921 | 5.97E-09   | 0.56759163 | 3.63E-17   |
| 4.27E-15   | 0.4104381  | 6.54E-09   | -0.6353185 | 2.65E-22   | -0.4051342 | 1.06E-08   |
| 1.51E-20   | 0.23078573 | 0.00157485 | -0.7130242 | 4.98E-30   | -0.4374551 | 4.78E-10   |
| 1.96E-48   | -0.6379913 | 1.56E-22   | 0.79651455 | 7.56E-42   | 0.42844899 | 1.17E-09   |
| 3.62E-35   | 0.50217592 | 3.27E-13   | -0.794951  | 1.41E-41   | -0.4526574 | 9.87E-11   |
| 7.71E-23   | -0.6150137 | 1.24E-20   | 0.89558256 | 2.81E-66   | 0.56131625 | 9.49E-17   |
| 1.53E-31   | 0.22237138 | 0.00234808 | -0.5988032 | 2.20E-19   | -0.2912902 | 5.75E-05   |
| 4.83E-38   | -0.2853247 | 8.26E-05   | 0.61171262 | 2.26E-20   | 0.14034378 | 0.05673009 |
| 1.17E-54   | -0.4949887 | 7.94E-13   | 0.82555832 | 2.40E-47   | 0.37055719 | 2.08E-07   |
| 1.11E-19   | -0.4744567 | 8.95E-12   | 0.7487019  | 1.66E-34   | 0.19440905 | 0.00800936 |
| 1.99E-25   | -0.1221766 | 0.09757393 | 0.64245272 | 6.41E-23   | 0.22858713 | 0.00175051 |
| 7.72E-08   | -0.334951  | 3.16E-06   | 0.49418954 | 8.75E-13   | 0.05201998 | 0.48191312 |
| 1.75E-11   | -0.3587196 | 5.33E-07   | 0.72834473 | 7.27E-32   | 0.24082436 | 0.00095964 |
| 1.86E-47   | -0.4999067 | 4.34E-13   | 0.80251416 | 6.59E-43   | 0.30848911 | 1.94E-05   |
| 1.70E-53   | -0.5996051 | 1.92E-19   | 0.9392878  | 6.11E-87   | 0.70094728 | 1.15E-28   |
| 6.92E-16   | -0.5519954 | 3.82E-16   | 0.79043496 | 8.26E-41   | 0.76492548 | 8.43E-37   |
| 1.16E-06   | 0.21114303 | 0.00391428 | -0.4913702 | 1.23E-12   | -0.4340106 | 6.75E-10   |
| 1.31E-26   | -0.4492262 | 1.42E-10   | 0.67809518 | 2.91E-26   | 0.18648425 | 0.01103452 |
| 2.88E-05   | -0.3225073 | 7.57E-06   | 0.60679819 | 5.44E-20   | 0.39593535 | 2.43E-08   |
| 0.00022842 | -0.3050133 | 2.43E-05   | 0.62450799 | 2.13E-21   | 0.5350298  | 4.32E-15   |
| 6.43E-43   | -0.5430987 | 1.39E-15   | 0.93897907 | 9.58E-87   | 0.5579438  | 1.58E-16   |
| 1.52E-13   | 0.27566807 | 0.00014591 | -0.6458835 | 3.19E-23   | -0.5000323 | 4.27E-13   |
| 1.11E-26   | -0.3006928 | 3.20E-05   | 0.69891908 | 1.92E-28   | 0.250421   | 0.00058613 |
| 8.88E-33   | -0.5934285 | 5.52E-19   | 0.90395553 | 1.99E-69   | 0.58740272 | 1.51E-18   |
| 0.00289383 | 0.3310421  | 4.17E-06   | -0.5966857 | 3.17E-19   | -0.4417689 | 3.08E-10   |
| 0.09304018 | 0.07713713 | 0.29665984 | -0.2322833 | 0.00146458 | -0.1435582 | 0.05123843 |
| 4.94E-08   | 0.2810551  | 0.00010651 | -0.4987184 | 5.03E-13   | -0.6047024 | 7.88E-20   |
| 2.14E-23   | 0.42464426 | 1.70E-09   | -0.7360439 | 7.78E-33   | -0.5706564 | 2.25E-17   |
| 7.02E-22   | -0.5225929 | 2.35E-14   | 0.73548859 | 9.17E-33   | 0.86751861 | 2.13E-57   |
| 9.27E-46   | -0.5337357 | 5.17E-15   | 0.8458952  | 7.67E-52   | 0.45172777 | 1.09E-10   |
| 0.00128443 | 0.51686057 | 5.01E-14   | -0.47033   | 1.43E-11   | -0.5073045 | 1.72E-13   |
| 1.15E-30   | 0.43839182 | 4.34E-10   | -0.7036341 | 5.80E-29   | -0.5127112 | 8.59E-14   |
| 1.40E-13   | 0.22947986 | 0.00167713 | -0.4925411 | 1.07E-12   | -0.6342861 | 3.25E-22   |
| 0.00014453 | 0.23110344 | 0.00155084 | -0.3506458 | 9.92E-07   | -0.4867182 | 2.15E-12   |
| 2.44E-09   | 0.61062357 | 2.75E-20   | -0.756271  | 1.49E-35   | -0.4281468 | 1.21E-09   |
| 1.35E-85   | -0.4938505 | 9.12E-13   | 0.83767047 | 6.00E-50   | 0.51943511 | 3.57E-14   |

|            |            |            |            |          |            |            |
|------------|------------|------------|------------|----------|------------|------------|
| 2.07E-29   | -0.4177187 | 3.30E-09   | 0.74203366 | 1.30E-33 | 0.21528982 | 0.00325047 |
| 3.12E-05   | 0.26272936 | 0.00030271 | -0.5690371 | 2.90E-17 | -0.1547604 | 0.03543153 |
| 6.55E-47   | -0.5198652 | 3.37E-14   | 0.79871817 | 3.12E-42 | 0.32789425 | 5.21E-06   |
| 6.25E-09   | 0.2785055  | 0.00012372 | -0.7027208 | 7.33E-29 | -0.3292647 | 4.73E-06   |
| 1.53E-26   | 0.51465731 | 6.68E-14   | -0.5036145 | 2.73E-13 | -0.3313134 | 4.09E-06   |
| 1.39E-20   | 0.35531397 | 6.94E-07   | -0.7529829 | 4.28E-35 | -0.7266005 | 1.19E-31   |
| 3.87E-05   | -0.5120151 | 9.40E-14   | 0.49452403 | 8.41E-13 | 0.40349375 | 1.23E-08   |
| 2.85E-33   | -0.4183438 | 3.11E-09   | 0.67944192 | 2.13E-26 | 0.31086872 | 1.66E-05   |
| 4.86E-31   | 0.26848655 | 0.00021977 | -0.5732655 | 1.49E-17 | -0.5004497 | 4.06E-13   |
| 1.75E-29   | -0.2747159 | 0.00015415 | 0.59358928 | 5.37E-19 | 0.5976387  | 2.69E-19   |
| 2.03E-32   | 0.58016083 | 4.96E-18   | -0.780092  | 4.05E-39 | -0.7766773 | 1.40E-38   |
| 8.56E-67   | -0.5099293 | 1.23E-13   | 0.80789126 | 6.88E-44 | 0.49587543 | 7.13E-13   |
| 1.58E-13   | 0.24759467 | 0.00067908 | -0.4988173 | 4.97E-13 | -0.4913149 | 1.24E-12   |
| 1.83E-14   | 0.54673404 | 8.22E-16   | -0.7253448 | 1.70E-31 | -0.580024  | 5.07E-18   |
| 1.71E-36   | -0.528846  | 1.01E-14   | 0.94954746 | 4.32E-94 | 0.68262201 | 1.01E-26   |
| 6.80E-22   | 0.49099144 | 1.29E-12   | -0.7670739 | 4.05E-37 | -0.6523215 | 8.43E-24   |
| 3.89E-53   | -0.4810373 | 4.19E-12   | 0.82831958 | 6.39E-48 | 0.75436866 | 2.75E-35   |
| 1.65E-49   | -0.3950499 | 2.62E-08   | 0.83041576 | 2.30E-48 | 0.34433651 | 1.59E-06   |
| 5.82E-47   | -0.4751741 | 8.24E-12   | 0.88069972 | 2.74E-61 | 0.46564286 | 2.41E-11   |
| 1.19E-15   | -0.5509382 | 4.46E-16   | 0.69088033 | 1.40E-27 | 0.18931058 | 0.0098563  |
| 6.86E-33   | 0.56161485 | 9.07E-17   | -0.9157711 | 2.10E-74 | -0.7196232 | 8.34E-31   |
| 5.02E-09   | 0.39298069 | 3.15E-08   | -0.5851674 | 2.19E-18 | -0.596637  | 3.20E-19   |
| 1.10E-36   | -0.5988662 | 2.18E-19   | 0.89867451 | 2.08E-67 | 0.72531941 | 1.71E-31   |
| 8.34E-45   | -0.5985319 | 2.31E-19   | 0.91948594 | 4.03E-76 | 0.60145443 | 1.39E-19   |
| 7.19E-29   | 0.58806232 | 1.36E-18   | -0.7459418 | 3.91E-34 | -0.7933461 | 2.66E-41   |
| 2.47E-07   | 0.61147395 | 2.36E-20   | -0.5734081 | 1.46E-17 | -0.4279232 | 1.23E-09   |
| 2.45E-15   | 0.37214645 | 1.83E-07   | -0.647283  | 2.40E-23 | -0.633323  | 3.92E-22   |
| 4.52E-52   | 0.44876525 | 1.49E-10   | -0.7331122 | 1.84E-32 | -0.3621087 | 4.09E-07   |
| 3.48E-14   | 0.44036819 | 3.55E-10   | -0.7716839 | 8.21E-38 | -0.5304402 | 8.13E-15   |
| 1.85E-30   | 0.33696884 | 2.73E-06   | -0.5929154 | 6.02E-19 | -0.2299755 | 0.00163762 |
| 3.37E-45   | 0.40401541 | 1.18E-08   | -0.6980194 | 2.41E-28 | -0.4743301 | 9.08E-12   |
| 7.44E-09   | -0.2230607 | 0.0022737  | 0.63516377 | 2.73E-22 | 0.36237146 | 4.01E-07   |
| 1.05E-39   | -0.4787909 | 5.44E-12   | 0.76011977 | 4.21E-36 | 0.30996824 | 1.76E-05   |
| 6.63E-16   | 0.56488282 | 5.51E-17   | -0.6169914 | 8.64E-21 | -0.4515626 | 1.11E-10   |
| 7.98E-39   | -0.4910156 | 1.29E-12   | 0.76023574 | 4.05E-36 | 0.30967071 | 1.79E-05   |
| 2.49E-11   | -0.3948087 | 2.68E-08   | 0.71514384 | 2.82E-30 | 0.4599214  | 4.52E-11   |
| 1.49E-15   | 0.51246607 | 8.87E-14   | -0.6781962 | 2.84E-26 | -0.5463908 | 8.64E-16   |
| 0.23276976 | 0.20562649 | 0.00498602 | -0.3767711 | 1.25E-07 | 0.08074133 | 0.27459484 |
| 1.23E-12   | 0.37269023 | 1.75E-07   | -0.7255987 | 1.58E-31 | -0.5833539 | 2.95E-18   |
| 3.60E-06   | 0.66450951 | 6.20E-25   | -0.5562817 | 2.02E-16 | -0.1398007 | 0.05770432 |
| 3.44E-17   | 0.61285539 | 1.84E-20   | -0.6726032 | 1.02E-25 | -0.2769522 | 0.00013544 |
| 3.17E-14   | -0.433767  | 6.92E-10   | 0.74667376 | 3.12E-34 | 0.288636   | 6.77E-05   |
| 0.07995417 | -0.3429811 | 1.76E-06   | 0.44216715 | 2.95E-10 | 0.51442541 | 6.88E-14   |
| 4.07E-46   | 0.52589264 | 1.51E-14   | -0.9190825 | 6.24E-76 | -0.7267052 | 1.16E-31   |
| 4.38E-07   | -0.3885915 | 4.60E-08   | 0.70873959 | 1.55E-29 | 0.24316762 | 0.00085231 |
| 2.12E-25   | -0.249569  | 0.00061283 | 0.46679578 | 2.12E-11 | 0.06145626 | 0.40596471 |

|            |            |            |            |          |            |            |
|------------|------------|------------|------------|----------|------------|------------|
| 5.77E-33   | 0.54592503 | 9.24E-16   | -0.8307727 | 1.93E-48 | -0.6867538 | 3.80E-27   |
| 1.98E-23   | 0.29880301 | 3.61E-05   | -0.553178  | 3.21E-16 | -0.4894173 | 1.56E-12   |
| 4.80E-25   | 0.37570218 | 1.37E-07   | -0.6482169 | 1.98E-23 | -0.496413  | 6.67E-13   |
| 4.83E-26   | 0.35979411 | 4.90E-07   | -0.6534484 | 6.66E-24 | -0.4957953 | 7.20E-13   |
| 1.77E-29   | -0.5880333 | 1.36E-18   | 0.91731197 | 4.16E-75 | 0.55207394 | 3.77E-16   |
| 0.41678834 | 0.45709128 | 6.14E-11   | -0.5168097 | 5.04E-14 | -0.3371777 | 2.69E-06   |
| 4.77E-52   | -0.5489861 | 5.93E-16   | 0.87750087 | 2.65E-60 | 0.5647097  | 5.65E-17   |
| 4.17E-31   | 0.39040288 | 3.94E-08   | -0.6092687 | 3.51E-20 | -0.178403  | 0.01511465 |
| 6.78E-27   | -0.5046176 | 2.41E-13   | 0.81745895 | 1.03E-45 | 0.33447026 | 3.27E-06   |
| 1.99E-07   | -0.5011463 | 3.72E-13   | 0.61785688 | 7.37E-21 | 0.401844   | 1.43E-08   |
| 4.83E-14   | -0.5248102 | 1.74E-14   | 0.79680368 | 6.74E-42 | 0.55460719 | 2.60E-16   |
| 1.61E-16   | -0.0173411 | 0.81476545 | -0.4818773 | 3.80E-12 | -0.3835578 | 7.08E-08   |
| 0.00012807 | -0.4139082 | 4.73E-09   | 0.68276089 | 9.80E-27 | 0.47238384 | 1.13E-11   |
| 6.56E-40   | 0.34171884 | 1.93E-06   | -0.8252017 | 2.85E-47 | -0.6165329 | 9.40E-21   |
| 2.09E-06   | -0.428169  | 1.20E-09   | 0.717501   | 1.49E-30 | 0.46425421 | 2.81E-11   |
| 8.24E-21   | -0.5571385 | 1.78E-16   | 0.83931247 | 2.56E-50 | 0.63621646 | 2.22E-22   |
| 2.17E-24   | -0.4309151 | 9.19E-10   | 0.79918414 | 2.58E-42 | 0.70664207 | 2.67E-29   |
| 2.16E-11   | -0.4064546 | 9.43E-09   | 0.75916565 | 5.77E-36 | 0.59477229 | 4.40E-19   |
| 1.18E-10   | -0.5665918 | 4.23E-17   | 0.72160119 | 4.84E-31 | 0.46901308 | 1.66E-11   |
| 1.01E-36   | 0.45366031 | 8.87E-11   | -0.7951065 | 1.33E-41 | -0.7087437 | 1.54E-29   |
| 1.23E-26   | 0.80545701 | 1.93E-43   | -0.7429489 | 9.81E-34 | -0.6713219 | 1.36E-25   |
| 6.82E-39   | -0.5332852 | 5.50E-15   | 0.93534327 | 1.62E-84 | 0.77319605 | 4.83E-38   |
| 5.81E-14   | -0.4533668 | 9.15E-11   | 0.80042438 | 1.56E-42 | 0.43548353 | 5.83E-10   |
| 7.35E-21   | -0.5742806 | 1.27E-17   | 0.87037121 | 3.34E-58 | 0.6607249  | 1.41E-24   |
| 1.97E-16   | 0.30363408 | 2.65E-05   | -0.6553642 | 4.44E-24 | -0.6847389 | 6.14E-27   |
| 4.36E-42   | 0.4544391  | 8.16E-11   | -0.870993  | 2.21E-58 | -0.667046  | 3.54E-25   |
| 4.34E-34   | -0.5927895 | 6.15E-19   | 0.9471182  | 2.85E-92 | 0.61271045 | 1.89E-20   |
| 1.39E-23   | -0.4891263 | 1.61E-12   | 0.75870287 | 6.71E-36 | 0.39648962 | 2.31E-08   |
| 2.37E-31   | -0.4607112 | 4.15E-11   | 0.92895205 | 6.69E-81 | 0.60694435 | 5.30E-20   |
| 5.99E-29   | 0.27534256 | 0.00014868 | -0.7595839 | 5.02E-36 | -0.3893108 | 4.33E-08   |
| 3.32E-22   | -0.446253  | 1.94E-10   | 0.68716421 | 3.44E-27 | 0.32222182 | 7.72E-06   |
| 9.88E-42   | -0.5780684 | 6.95E-18   | 0.79934645 | 2.42E-42 | 0.52600673 | 1.49E-14   |
| 8.64E-18   | 0.72663978 | 1.18E-31   | -0.5332082 | 5.56E-15 | -0.366715  | 2.84E-07   |
| 5.01E-34   | 0.4359109  | 5.58E-10   | -0.7768592 | 1.31E-38 | -0.7517332 | 6.38E-35   |
| 3.26E-31   | 0.40379787 | 1.20E-08   | -0.6746667 | 6.39E-26 | -0.5651696 | 5.27E-17   |
| 8.97E-13   | -0.4468337 | 1.82E-10   | 0.76246368 | 1.93E-36 | 0.48295998 | 3.35E-12   |
| 1.91E-15   | 0.22122307 | 0.0024769  | -0.5703005 | 2.38E-17 | -0.684207  | 6.96E-27   |
| 2.60E-32   | -0.4568952 | 6.27E-11   | 0.8011343  | 1.16E-42 | 0.82538072 | 2.62E-47   |
| 3.06E-45   | -0.5336253 | 5.24E-15   | 0.95629709 | 1.15E-99 | 0.78928418 | 1.29E-40   |
| 8.50E-27   | -0.4241313 | 1.79E-09   | 0.85184499 | 2.79E-53 | 0.38099278 | 8.79E-08   |
| 1.58E-38   | -0.4111106 | 6.14E-09   | 0.78878767 | 1.56E-40 | 0.34942262 | 1.09E-06   |
| 4.27E-23   | -0.4490159 | 1.45E-10   | 0.61376029 | 1.56E-20 | 0.34223707 | 1.86E-06   |
| 1.96E-17   | 0.38841734 | 4.67E-08   | -0.7431906 | 9.11E-34 | -0.5700211 | 2.48E-17   |
| 2.25E-12   | -0.3710585 | 2.00E-07   | 0.64145068 | 7.84E-23 | 0.55952478 | 1.24E-16   |
| 6.35E-34   | 0.18504662 | 0.01168015 | -0.6113023 | 2.43E-20 | -0.306921  | 2.14E-05   |
| 8.41E-24   | -0.4791882 | 5.19E-12   | 0.73355159 | 1.62E-32 | 0.16261618 | 0.02699642 |

|            |            |            |            |            |            |            |
|------------|------------|------------|------------|------------|------------|------------|
| 1.49E-17   | -0.4098542 | 6.90E-09   | 0.77758732 | 1.01E-38   | 0.5324775  | 6.15E-15   |
| 2.80E-48   | 0.35851962 | 5.42E-07   | -0.6913494 | 1.25E-27   | -0.5294709 | 9.28E-15   |
| 7.14E-09   | 0.33159968 | 4.01E-06   | -0.719002  | 9.89E-31   | -0.1807498 | 0.0138121  |
| 0.03426096 | -0.423464  | 1.91E-09   | 0.53927427 | 2.38E-15   | 0.51442315 | 6.88E-14   |
| 2.56E-60   | -0.5836209 | 2.82E-18   | 0.93437351 | 6.03E-84   | 0.63990498 | 1.07E-22   |
| 2.14E-41   | -0.4859747 | 2.35E-12   | 0.63243702 | 4.66E-22   | 0.28800577 | 7.03E-05   |
| 5.85E-17   | -0.4774648 | 6.34E-12   | 0.75042398 | 9.65E-35   | 0.52899454 | 9.90E-15   |
| 9.70E-17   | 0.03022638 | 0.68295799 | 0.67886862 | 2.43E-26   | 0.33072803 | 4.27E-06   |
| 9.43E-32   | 0.38228999 | 7.88E-08   | -0.848838  | 1.52E-52   | -0.7862138 | 4.15E-40   |
| 8.70E-18   | 0.27035079 | 0.00019781 | -0.7056383 | 3.46E-29   | -0.1605105 | 0.02906879 |
| 2.88E-34   | -0.3940912 | 2.85E-08   | 0.74536988 | 4.67E-34   | 0.26546968 | 0.00026015 |
| 1.79E-16   | 0.39771886 | 2.07E-08   | -0.6984343 | 2.17E-28   | -0.5829756 | 3.14E-18   |
| 2.10E-24   | 0.52193421 | 2.56E-14   | -0.6936244 | 7.17E-28   | -0.5575492 | 1.67E-16   |
| 4.82E-29   | -0.4866187 | 2.17E-12   | 0.81806459 | 7.81E-46   | 0.56990706 | 2.53E-17   |
| 6.06E-22   | -0.4728069 | 1.08E-11   | 0.84453628 | 1.60E-51   | 0.78405315 | 9.35E-40   |
| 1.53E-13   | -0.4184474 | 3.08E-09   | 0.79773354 | 4.64E-42   | 0.70400435 | 5.28E-29   |
| 1.04E-12   | -0.5401756 | 2.10E-15   | 0.60986209 | 3.15E-20   | 0.10553808 | 0.15279176 |
| 2.01E-48   | -0.3990152 | 1.85E-08   | 0.68969332 | 1.87E-27   | 0.28863153 | 6.77E-05   |
| 2.25E-09   | -0.4847382 | 2.72E-12   | 0.67141165 | 1.34E-25   | 0.34081842 | 2.06E-06   |
| 8.64E-47   | -0.5048803 | 2.33E-13   | 0.78619667 | 4.18E-40   | 0.51278158 | 8.51E-14   |
| 1.40E-64   | -0.5753265 | 1.08E-17   | 0.96307685 | 3.15E-106  | 0.67553004 | 5.25E-26   |
| 4.63E-25   | -0.53304   | 5.69E-15   | 0.88556062 | 7.67E-63   | 0.57774153 | 7.32E-18   |
| 3.81E-12   | -0.4947371 | 8.19E-13   | 0.8298607  | 3.02E-48   | 0.54394109 | 1.23E-15   |
| 8.15E-24   | 0.62024036 | 4.74E-21   | -0.607325  | 4.96E-20   | -0.4731217 | 1.04E-11   |
| 1.23E-12   | 0.30682006 | 2.16E-05   | -0.6876978 | 3.03E-27   | -0.5429871 | 1.41E-15   |
| 2.36E-45   | 0.55822516 | 1.51E-16   | -0.6817303 | 1.25E-26   | -0.56638   | 4.37E-17   |
| 4.74E-22   | -0.3138945 | 1.36E-05   | 0.83543396 | 1.88E-49   | 0.49206319 | 1.13E-12   |
| 5.70E-13   | 0.73127656 | 3.13E-32   | -0.5518072 | 3.92E-16   | -0.1831465 | 0.01258432 |
| 1.14E-09   | 0.30983793 | 1.77E-05   | -0.6705343 | 1.63E-25   | -0.6678898 | 2.94E-25   |
| 4.93E-18   | 0.34050601 | 2.11E-06   | -0.733787  | 1.51E-32   | -0.7697932 | 1.59E-37   |
| 2.29E-16   | 0.44412633 | 2.41E-10   | -0.7619902 | 2.26E-36   | -0.6650487 | 5.50E-25   |
| 9.16E-12   | 0.28634937 | 7.77E-05   | -0.7711779 | 9.80E-38   | -0.4534608 | 9.06E-11   |
| 8.16E-07   | 0.22704585 | 0.00188411 | -0.5877636 | 1.43E-18   | -0.6464248 | 2.86E-23   |
| 5.17E-35   | -0.4641679 | 2.84E-11   | 0.82325109 | 7.15E-47   | 0.38091788 | 8.85E-08   |
| 1.25E-42   | -0.6115843 | 2.31E-20   | 0.89235527 | 3.91E-65   | 0.57136953 | 2.01E-17   |
| 0.03980819 | -0.2120851 | 0.00375359 | 0.20256847 | 0.00568735 | 0.37790113 | 1.14E-07   |
| 1.01E-08   | -0.4933496 | 9.69E-13   | 0.73602981 | 7.82E-33   | 0.37832621 | 1.10E-07   |
| 9.54E-10   | -0.3776119 | 1.17E-07   | 0.5679251  | 3.44E-17   | 0.16917543 | 0.02133195 |
| 1.23E-09   | 0.55981566 | 1.19E-16   | -0.7332654 | 1.76E-32   | -0.3244962 | 6.60E-06   |
| 1.06E-24   | -0.3706897 | 2.06E-07   | 0.84314366 | 3.39E-51   | 0.32769894 | 5.28E-06   |
| 2.28E-26   | 0.43720253 | 4.90E-10   | -0.7345189 | 1.22E-32   | -0.4505338 | 1.24E-10   |
| 1.75E-16   | -0.2518148 | 0.00054475 | 0.59198952 | 7.04E-19   | 0.06334407 | 0.39166954 |
| 1.95E-49   | 0.43592959 | 5.57E-10   | -0.8595444 | 3.06E-55   | -0.5975046 | 2.76E-19   |
| 5.22E-26   | -0.3033951 | 2.69E-05   | 0.62240547 | 3.16E-21   | 0.44618369 | 1.95E-10   |
| 5.46E-15   | -0.4992237 | 4.72E-13   | 0.77463736 | 2.90E-38   | 0.56389636 | 6.40E-17   |
| 7.33E-06   | -0.4465877 | 1.87E-10   | 0.63056931 | 6.69E-22   | 0.46461677 | 2.70E-11   |



|            |            |            |            |            |            |            |
|------------|------------|------------|------------|------------|------------|------------|
| 3.53E-07   | -0.325641  | 6.09E-06   | 0.63809361 | 1.53E-22   | 0.43215485 | 8.13E-10   |
| 2.23E-27   | -0.1200553 | 0.1035771  | 0.59212506 | 6.88E-19   | 0.19683562 | 0.00724363 |
| 8.59E-06   | 0.21486892 | 0.00331288 | -0.5277382 | 1.17E-14   | -0.4757941 | 7.68E-12   |
| 9.94E-18   | 0.34094936 | 2.04E-06   | -0.6897576 | 1.84E-27   | -0.6552275 | 4.57E-24   |
| 3.13E-28   | -0.3517721 | 9.11E-07   | 0.62127768 | 3.90E-21   | 0.07320194 | 0.32205937 |
| 2.00E-08   | -0.3638298 | 3.57E-07   | 0.38044726 | 9.20E-08   | 0.04248756 | 0.5658082  |
| 2.93E-34   | 0.62086531 | 4.22E-21   | -0.707439  | 2.17E-29   | -0.6225533 | 3.07E-21   |
| 0.4936175  | -0.3239201 | 6.87E-06   | 0.48943773 | 1.55E-12   | 0.23591434 | 0.00122589 |
| 1.61E-30   | 0.46259146 | 3.38E-11   | -0.8952889 | 3.58E-66   | -0.6271339 | 1.29E-21   |
| 5.09E-09   | 0.39473887 | 2.70E-08   | -0.6699158 | 1.87E-25   | -0.1058141 | 0.15171489 |
| 1.02E-44   | 0.41070669 | 6.38E-09   | -0.7414721 | 1.54E-33   | -0.5139612 | 7.31E-14   |
| 5.81E-11   | -0.3713916 | 1.94E-07   | 0.78580432 | 4.85E-40   | 0.33781324 | 2.57E-06   |
| 3.08E-32   | -0.4754004 | 8.03E-12   | 0.84830837 | 2.03E-52   | 0.74885811 | 1.58E-34   |
| 3.95E-19   | 0.52335051 | 2.12E-14   | -0.6896272 | 1.90E-27   | -0.0663705 | 0.3693946  |
| 1.64E-09   | -0.4922275 | 1.11E-12   | 0.70969018 | 1.20E-29   | 0.34721963 | 1.28E-06   |
| 0.00157956 | 0.48009944 | 4.67E-12   | -0.4700505 | 1.47E-11   | -0.4608793 | 4.07E-11   |
| 2.05E-08   | -0.4823067 | 3.61E-12   | 0.46614942 | 2.28E-11   | 0.60096972 | 1.51E-19   |
| 4.16E-28   | 0.37375148 | 1.60E-07   | -0.6957246 | 4.27E-28   | -0.7595776 | 5.03E-36   |
| 3.33E-15   | -0.4585158 | 5.26E-11   | 0.78193704 | 2.05E-39   | 0.71902513 | 9.83E-31   |
| 9.88E-29   | -0.5443463 | 1.16E-15   | 0.89536092 | 3.38E-66   | 0.7400223  | 2.38E-33   |
| 3.56E-22   | -0.5344719 | 4.66E-15   | 0.89423128 | 8.55E-66   | 0.72042796 | 6.69E-31   |
| 0.00011667 | -0.3380351 | 2.53E-06   | 0.48204058 | 3.73E-12   | 0.80159682 | 9.62E-43   |
| 5.31E-54   | -0.5589774 | 1.35E-16   | 0.90055331 | 4.09E-68   | 0.65926503 | 1.93E-24   |
| 3.72E-24   | -0.5787693 | 6.21E-18   | 0.63401462 | 3.42E-22   | 0.32071793 | 8.55E-06   |
| 1.01E-29   | -0.5673246 | 3.78E-17   | 0.9491292  | 9.01E-94   | 0.6834947  | 8.24E-27   |
| 3.87E-25   | -0.4887544 | 1.69E-12   | 0.86251213 | 5.00E-56   | 0.80923225 | 3.87E-44   |
| 1.32E-59   | -0.3919398 | 3.44E-08   | 0.73156902 | 2.88E-32   | 0.32211052 | 7.78E-06   |
| 6.11E-53   | -0.5592822 | 1.29E-16   | 0.91894469 | 7.25E-76   | 0.82406172 | 4.88E-47   |
| 2.43E-12   | 0.76528993 | 7.45E-37   | -0.7284422 | 7.07E-32   | -0.4185899 | 3.04E-09   |
| 2.99E-28   | -0.5040152 | 2.60E-13   | 0.7598873  | 4.54E-36   | 0.46996297 | 1.49E-11   |
| 1.32E-37   | 0.3647368  | 3.32E-07   | -0.791529  | 5.41E-41   | -0.6570024 | 3.14E-24   |
| 1.51E-28   | 0.32499347 | 6.37E-06   | -0.7860769 | 4.37E-40   | -0.6184402 | 6.61E-21   |
| 1.70E-39   | -0.5996813 | 1.89E-19   | 0.89374334 | 1.27E-65   | 0.57393616 | 1.34E-17   |
| 0.82060057 | 0.24010973 | 0.00099476 | -0.4487806 | 1.49E-10   | -0.2573069 | 0.00040661 |
| 1.51E-35   | 0.53004054 | 8.59E-15   | -0.8392051 | 2.71E-50   | -0.8442221 | 1.90E-51   |
| 0.00392399 | -0.0723025 | 0.32805694 | -0.1419195 | 0.05398023 | 0.39177918 | 3.49E-08   |
| 5.59E-15   | -0.3902326 | 4.00E-08   | 0.71524011 | 2.75E-30   | 0.85586998 | 2.72E-54   |
| 9.09E-38   | 0.41361492 | 4.86E-09   | -0.8341083 | 3.67E-49   | -0.6432521 | 5.45E-23   |
| 5.56E-18   | -0.337749  | 2.58E-06   | 0.5415237  | 1.73E-15   | 0.09829441 | 0.18315196 |
| 9.19E-24   | -0.5785532 | 6.43E-18   | 0.76690166 | 4.30E-37   | 0.261314   | 0.00032715 |
| 1.11E-12   | -0.2846234 | 8.62E-05   | 0.62879569 | 9.41E-22   | 0.25703259 | 0.00041266 |
| 0.47818936 | 0.2786941  | 0.00012236 | -0.4020269 | 1.41E-08   | -0.2363871 | 0.00119758 |
| 9.35E-13   | -0.5275761 | 1.20E-14   | 0.81290252 | 7.84E-45   | 0.61283913 | 1.84E-20   |
| 1.19E-10   | 0.42211174 | 2.17E-09   | -0.7238357 | 2.60E-31   | -0.1983609 | 0.00679632 |
| 0.00013417 | 0.25035634 | 0.00058812 | -0.5448754 | 1.07E-15   | -0.5742193 | 1.28E-17   |
| 8.55E-15   | 0.24573724 | 0.00074737 | -0.3828454 | 7.52E-08   | 0.09426102 | 0.20186989 |

|            |            |            |            |          |            |            |
|------------|------------|------------|------------|----------|------------|------------|
| 2.42E-07   | 0.21936083 | 0.0026995  | -0.4107583 | 6.34E-09 | -0.6204855 | 4.53E-21   |
| 2.33E-17   | -0.5138759 | 7.39E-14   | 0.72136899 | 5.16E-31 | 0.60575542 | 6.55E-20   |
| 1.13E-25   | -0.4405899 | 3.47E-10   | 0.82352483 | 6.29E-47 | 0.69329209 | 7.78E-28   |
| 6.63E-05   | -0.3629869 | 3.82E-07   | 0.53821937 | 2.76E-15 | 0.56892885 | 2.95E-17   |
| 2.84E-35   | 0.52541543 | 1.61E-14   | -0.6067043 | 5.54E-20 | -0.5908515 | 8.52E-19   |
| 8.78E-19   | -0.4535072 | 9.02E-11   | 0.66948604 | 2.06E-25 | 0.19933851 | 0.00652275 |
| 0.41461628 | -0.1644194 | 0.02532355 | 0.41373435 | 4.81E-09 | 0.12481887 | 0.09048592 |
| 0.02802486 | 0.10438675 | 0.15734541 | -0.3148459 | 1.27E-05 | -0.3798898 | 9.64E-08   |
| 7.31E-06   | -0.2774725 | 0.0001314  | 0.63780052 | 1.62E-22 | 0.49449786 | 8.43E-13   |
| 6.25E-43   | 0.35634219 | 6.41E-07   | -0.7883528 | 1.84E-40 | -0.3625234 | 3.96E-07   |
| 2.52E-17   | 0.15326504 | 0.0372674  | -0.5382807 | 2.74E-15 | -0.6200178 | 4.94E-21   |
| 4.93E-30   | 0.6147129  | 1.31E-20   | -0.8952601 | 3.67E-66 | -0.5876565 | 1.45E-18   |
| 4.49E-27   | 0.46986687 | 1.50E-11   | -0.7404306 | 2.10E-33 | -0.842946  | 3.77E-51   |
| 1.36E-11   | 0.30622878 | 2.24E-05   | -0.6220153 | 3.40E-21 | -0.658176  | 2.44E-24   |
| 8.17E-13   | -0.4312577 | 8.88E-10   | 0.75154139 | 6.78E-35 | 0.6255954  | 1.73E-21   |
| 4.71E-18   | 0.3586468  | 5.36E-07   | -0.6918443 | 1.11E-27 | -0.5575888 | 1.66E-16   |
| 3.84E-12   | -0.4608929 | 4.06E-11   | 0.58502897 | 2.24E-18 | 0.21394058 | 0.00345435 |
| 3.63E-14   | 0.25958807 | 0.00035942 | -0.6281372 | 1.07E-21 | -0.6033853 | 9.94E-20   |
| 2.39E-14   | 0.320469   | 8.70E-06   | -0.6573453 | 2.92E-24 | -0.7716857 | 8.21E-38   |
| 5.24E-41   | 0.5201124  | 3.26E-14   | -0.8998099 | 7.81E-68 | -0.7252197 | 1.76E-31   |
| 8.31E-39   | 0.2159421  | 0.00315586 | -0.6776047 | 3.26E-26 | -0.4626189 | 3.37E-11   |
| 5.60E-27   | -0.4999565 | 4.31E-13   | 0.67903634 | 2.34E-26 | 0.2800936  | 0.00011272 |
| 3.17E-21   | -0.0714077 | 0.33409406 | 0.55340913 | 3.10E-16 | 0.28316305 | 9.40E-05   |
| 0.00318281 | -0.0271507 | 0.71372771 | 0.39407148 | 2.86E-08 | 0.23037861 | 0.00160611 |
| 6.91E-30   | 0.35924629 | 5.12E-07   | -0.7483426 | 1.86E-34 | -0.4040119 | 1.18E-08   |
| 0.00033869 | 0.27244154 | 0.00017563 | -0.4279431 | 1.23E-09 | -0.6128858 | 1.83E-20   |
| 1.92E-25   | -0.4964772 | 6.62E-13   | 0.60284019 | 1.09E-19 | 0.12942597 | 0.07911495 |
| 1.53E-26   | 0.35123943 | 9.48E-07   | -0.755653  | 1.81E-35 | -0.539381  | 2.35E-15   |
| 3.21E-10   | -0.4164538 | 3.72E-09   | 0.7900923  | 9.43E-41 | 0.59644755 | 3.30E-19   |
| 2.17E-13   | -0.4572356 | 6.05E-11   | 0.48145268 | 3.99E-12 | 0.2084062  | 0.00441689 |
| 2.95E-08   | 0.69754332 | 2.71E-28   | -0.6109627 | 2.59E-20 | -0.369783  | 2.22E-07   |
| 4.41E-05   | 0.24896396 | 0.00063247 | -0.5700977 | 2.45E-17 | -0.5285668 | 1.05E-14   |
| 4.37E-35   | -0.5720898 | 1.80E-17   | 0.86489996 | 1.13E-56 | 0.74062129 | 1.99E-33   |
| 0.00015029 | 0.28658648 | 7.66E-05   | -0.5001295 | 4.22E-13 | -0.1171642 | 0.11222307 |
| 1.34E-23   | -0.286947  | 7.49E-05   | 0.73007232 | 4.43E-32 | 0.44847798 | 1.53E-10   |
| 2.29E-11   | -0.4544402 | 8.16E-11   | 0.70645912 | 2.80E-29 | 0.55625152 | 2.03E-16   |
| 8.59E-26   | 0.3504201  | 1.01E-06   | -0.7833784 | 1.20E-39 | -0.4546137 | 8.01E-11   |
| 3.73E-17   | -0.5047376 | 2.37E-13   | 0.86276773 | 4.27E-56 | 0.57148178 | 1.98E-17   |
| 2.14E-43   | -0.5246697 | 1.78E-14   | 0.72112258 | 5.52E-31 | 0.46148548 | 3.81E-11   |
| 8.62E-08   | -0.4451822 | 2.16E-10   | 0.70392617 | 5.38E-29 | 0.32294646 | 7.34E-06   |
| 8.16E-36   | 0.45264219 | 9.89E-11   | -0.8188519 | 5.46E-46 | -0.7808779 | 3.03E-39   |
| 4.47E-28   | 0.24185657 | 0.00091091 | -0.7994601 | 2.31E-42 | -0.4163635 | 3.76E-09   |
| 1.78E-06   | 0.34892831 | 1.13E-06   | -0.717309  | 1.57E-30 | -0.36301   | 3.81E-07   |
| 1.39E-28   | 0.36326087 | 3.73E-07   | -0.6709732 | 1.48E-25 | -0.4945392 | 8.39E-13   |
| 6.19E-15   | -0.4906828 | 1.34E-12   | 0.76003435 | 4.33E-36 | 0.33377547 | 3.44E-06   |
| 0.03627758 | -0.3389929 | 2.36E-06   | 0.52332573 | 2.13E-14 | 0.59042727 | 9.15E-19   |

|            |            |            |            |           |            |            |
|------------|------------|------------|------------|-----------|------------|------------|
| 6.20E-07   | 0.09410245 | 0.20263304 | -0.488427  | 1.75E-12  | -0.6840699 | 7.19E-27   |
| 7.56E-27   | -0.5658841 | 4.72E-17   | 0.85990153 | 2.47E-55  | 0.54694878 | 7.97E-16   |
| 1.78E-32   | -0.5719625 | 1.83E-17   | 0.9049759  | 7.85E-70  | 0.77945513 | 5.11E-39   |
| 0.00399577 | 0.56217069 | 8.33E-17   | -0.5483942 | 6.46E-16  | -0.364411  | 3.41E-07   |
| 4.01E-11   | 0.22194756 | 0.0023949  | -0.5776337 | 7.45E-18  | -0.6426529 | 6.15E-23   |
| 1.06E-24   | -0.3755147 | 1.39E-07   | 0.78145086 | 2.46E-39  | 0.52865628 | 1.04E-14   |
| 1.50E-20   | 0.34796184 | 1.21E-06   | -0.7662879 | 5.30E-37  | -0.4942213 | 8.72E-13   |
| 7.48E-09   | 0.29975382 | 3.40E-05   | -0.588508  | 1.26E-18  | -0.4443098 | 2.37E-10   |
| 2.00E-07   | -0.2660249 | 0.00025224 | 0.61998914 | 4.96E-21  | 0.66341361 | 7.88E-25   |
| 3.27E-28   | -0.5300213 | 8.61E-15   | 0.87091683 | 2.33E-58  | 0.51434091 | 6.96E-14   |
| 2.15E-08   | 0.16636903 | 0.02361578 | -0.4239737 | 1.81E-09  | -0.5087525 | 1.43E-13   |
| 0.00218227 | 0.3020232  | 2.94E-05   | -0.6578296 | 2.63E-24  | -0.4442874 | 2.37E-10   |
| 9.42E-39   | 0.34100426 | 2.04E-06   | -0.8310851 | 1.66E-48  | -0.5741478 | 1.30E-17   |
| 3.39E-05   | 0.22532209 | 0.00204448 | -0.4985398 | 5.14E-13  | -0.4416097 | 3.13E-10   |
| 5.67E-22   | -0.5284352 | 1.07E-14   | 0.84413372 | 1.99E-51  | 0.72531145 | 1.72E-31   |
| 3.05E-34   | 0.2323646  | 0.0014588  | -0.7075573 | 2.10E-29  | -0.3206195 | 8.61E-06   |
| 2.31E-43   | -0.5823774 | 3.46E-18   | 0.96026354 | 2.29E-103 | 0.64610834 | 3.05E-23   |
| 1.29E-14   | -0.4397484 | 3.78E-10   | 0.78533208 | 5.79E-40  | 0.46985696 | 1.51E-11   |
| 1.25E-41   | -0.4711367 | 1.30E-11   | 0.78435256 | 8.36E-40  | 0.28078591 | 0.00010822 |
| 2.10E-13   | -0.3855732 | 5.96E-08   | 0.74490334 | 5.39E-34  | 0.29066921 | 5.98E-05   |
| 2.97E-22   | -0.4376734 | 4.67E-10   | 0.68193529 | 1.19E-26  | 0.18979913 | 0.00966432 |
| 0.11803066 | 0.17717915 | 0.01583558 | -0.4921131 | 1.13E-12  | -0.0681486 | 0.35667977 |
| 7.87E-20   | -0.4471869 | 1.76E-10   | 0.81389111 | 5.07E-45  | 0.33737354 | 2.65E-06   |
| 4.18E-38   | 0.57880199 | 6.17E-18   | -0.8019248 | 8.41E-43  | -0.737163  | 5.59E-33   |
| 3.37E-30   | -0.2913138 | 5.74E-05   | 0.57079885 | 2.20E-17  | 0.08507373 | 0.24957858 |
| 1.11E-25   | -0.5132092 | 8.06E-14   | 0.90475699 | 9.59E-70  | 0.76329858 | 1.46E-36   |
| 2.58E-16   | 0.00729318 | 0.92151388 | -0.3462804 | 1.38E-06  | -0.0293823 | 0.69135322 |
| 1.66E-25   | -0.4656956 | 2.40E-11   | 0.81154764 | 1.42E-44  | 0.63328127 | 3.95E-22   |
| 0.00107862 | 0.44343714 | 2.59E-10   | -0.61225   | 2.05E-20  | -0.0001166 | 0.99874373 |
| 3.19E-06   | 0.25220498 | 0.00053366 | -0.6440924 | 4.60E-23  | -0.352093  | 8.89E-07   |
| 3.90E-46   | -0.5827206 | 3.27E-18   | 0.88544779 | 8.35E-63  | 0.76849756 | 2.49E-37   |
| 2.24E-20   | 0.55030462 | 4.89E-16   | -0.7714069 | 9.05E-38  | -0.6190562 | 5.90E-21   |
| 1.65E-15   | 0.22637357 | 0.00194524 | -0.5999363 | 1.81E-19  | -0.7725223 | 6.12E-38   |
| 5.28E-46   | -0.3686441 | 2.43E-07   | 0.80143991 | 1.03E-42  | 0.4339287  | 6.81E-10   |
| 3.10E-47   | -0.4772468 | 6.50E-12   | 0.85009173 | 7.52E-53  | 0.43097257 | 9.14E-10   |
| 3.98E-42   | 0.25079779 | 0.00057467 | -0.6188947 | 6.08E-21  | -0.4334704 | 7.13E-10   |
| 1.77E-30   | -0.5451321 | 1.04E-15   | 0.88719965 | 2.21E-63  | 0.605437   | 6.93E-20   |
| 2.30E-29   | -0.323417  | 7.11E-06   | 0.85439659 | 6.43E-54  | 0.42571793 | 1.53E-09   |
| 6.56E-38   | 0.58169982 | 3.86E-18   | -0.7027883 | 7.21E-29  | -0.511712  | 9.77E-14   |
| 8.61E-47   | -0.5903354 | 9.29E-19   | 0.87954404 | 6.26E-61  | 0.46217988 | 3.53E-11   |
| 0.251209   | 0.10666968 | 0.14841371 | -0.4190135 | 2.92E-09  | -0.4178137 | 3.27E-09   |
| 0.0017348  | 0.56883197 | 2.99E-17   | -0.4649137 | 2.61E-11  | -0.5419198 | 1.64E-15   |
| 0.0016704  | -0.4999431 | 4.32E-13   | 0.60296809 | 1.07E-19  | 0.53978513 | 2.22E-15   |
| 4.93E-39   | 0.3101839  | 1.73E-05   | -0.6959463 | 4.04E-28  | -0.4712466 | 1.29E-11   |
| 3.35E-11   | 0.57537039 | 1.07E-17   | -0.4023714 | 1.37E-08  | -0.2349077 | 0.00128821 |
| 2.87E-10   | -0.0666423 | 0.36743337 | 0.67606351 | 4.65E-26  | 0.42111888 | 2.39E-09   |

|            |            |            |            |          |            |            |
|------------|------------|------------|------------|----------|------------|------------|
| 1.75E-23   | 0.379032   | 1.04E-07   | -0.7793091 | 5.39E-39 | -0.6977826 | 2.56E-28   |
| 1.19E-08   | 0.66742147 | 3.26E-25   | -0.6685518 | 2.54E-25 | -0.0798275 | 0.28008109 |
| 1.85E-57   | -0.3925626 | 3.26E-08   | 0.71165493 | 7.16E-30 | 0.4743109  | 9.10E-12   |
| 1.07E-21   | -0.4566734 | 6.42E-11   | 0.78848888 | 1.75E-40 | 0.34506161 | 1.51E-06   |
| 5.91E-21   | 0.35182518 | 9.07E-07   | -0.6016653 | 1.34E-19 | -0.7183321 | 1.19E-30   |
| 7.92E-11   | 0.1966558  | 0.00729805 | -0.4718204 | 1.21E-11 | 0.00284694 | 0.96932079 |
| 8.68E-47   | -0.594451  | 4.64E-19   | 0.89949719 | 1.02E-67 | 0.50967596 | 1.27E-13   |
| 2.35E-17   | 0.4985953  | 5.10E-13   | -0.7849376 | 6.71E-40 | -0.1544271 | 0.03583397 |
| 9.97E-44   | 0.5602579  | 1.11E-16   | -0.8127591 | 8.35E-45 | -0.6771672 | 3.60E-26   |
| 1.81E-69   | -0.4896402 | 1.52E-12   | 0.91086733 | 2.96E-72 | 0.61939808 | 5.54E-21   |
| 7.70E-18   | -0.4402664 | 3.59E-10   | 0.72549651 | 1.63E-31 | 0.57473075 | 1.18E-17   |
| 1.93E-37   | -0.5199354 | 3.34E-14   | 0.9181627  | 1.68E-75 | 0.73612356 | 7.60E-33   |
| 2.02E-30   | 0.2829512  | 9.52E-05   | -0.7061074 | 3.07E-29 | -0.4066059 | 9.30E-09   |
| 4.63E-28   | 0.41130127 | 6.03E-09   | -0.758693  | 6.74E-36 | -0.2246924 | 0.0021061  |
| 0.00014362 | 0.30809991 | 1.99E-05   | -0.5077189 | 1.63E-13 | -0.0940646 | 0.20281553 |
| 3.82E-08   | -0.4016938 | 1.45E-08   | 0.71161632 | 7.24E-30 | 0.55656518 | 1.94E-16   |
| 3.46E-32   | -0.2978809 | 3.82E-05   | 0.6719948  | 1.17E-25 | 0.34829786 | 1.18E-06   |
| 6.51E-16   | -0.4314198 | 8.74E-10   | 0.70725493 | 2.28E-29 | 0.45517201 | 7.55E-11   |
| 9.09E-31   | -0.5945335 | 4.58E-19   | 0.92233386 | 1.70E-77 | 0.60650579 | 5.73E-20   |
| 0.00416183 | -0.3045891 | 2.49E-05   | 0.54283971 | 1.44E-15 | 0.12663866 | 0.08584774 |
| 8.19E-05   | 0.39575283 | 2.47E-08   | -0.5661798 | 4.51E-17 | -0.452516  | 1.00E-10   |
| 1.94E-16   | -0.4424277 | 2.88E-10   | 0.8114734  | 1.47E-44 | 0.57833482 | 6.66E-18   |
| 6.98E-08   | 0.26435025 | 0.00027682 | -0.6312001 | 5.92E-22 | -0.4379767 | 4.53E-10   |
| 0.08245343 | -0.2354457 | 0.00125455 | 0.53512213 | 4.26E-15 | 0.21028497 | 0.00406602 |
| 3.64E-19   | 0.36584976 | 3.04E-07   | -0.491319  | 1.24E-12 | -0.506314  | 1.95E-13   |
| 7.96E-09   | -0.3714373 | 1.94E-07   | 0.76871953 | 2.30E-37 | 0.34935374 | 1.09E-06   |
| 2.30E-46   | -0.5163616 | 5.35E-14   | 0.87477476 | 1.74E-59 | 0.6478638  | 2.13E-23   |
| 0.00036834 | -0.3288897 | 4.86E-06   | 0.37652317 | 1.28E-07 | -0.0086928 | 0.90651472 |
| 0.57381526 | -0.3372338 | 2.68E-06   | 0.33370713 | 3.45E-06 | -0.0174769 | 0.81334073 |
| 5.08E-27   | -0.5393898 | 2.34E-15   | 0.87854615 | 1.27E-60 | 0.67215068 | 1.13E-25   |
| 4.05E-17   | -0.1908066 | 0.00927882 | 0.78335649 | 1.21E-39 | 0.62059478 | 4.43E-21   |
| 1.19E-39   | 0.44886227 | 1.47E-10   | -0.6432387 | 5.47E-23 | -0.289827  | 6.29E-05   |
| 4.79E-58   | 0.39277242 | 3.20E-08   | -0.6664819 | 4.01E-25 | -0.4306008 | 9.48E-10   |
| 0.00092743 | -0.3681335 | 2.53E-07   | 0.62178074 | 3.55E-21 | 0.53541648 | 4.09E-15   |
| 9.54E-30   | -0.5394616 | 2.32E-15   | 0.80039442 | 1.58E-42 | 0.51067199 | 1.12E-13   |
| 1.87E-28   | -0.414237  | 4.59E-09   | 0.65632941 | 3.62E-24 | 0.30872671 | 1.91E-05   |
| 8.59E-15   | 0.38681011 | 5.37E-08   | -0.7067933 | 2.57E-29 | -0.5077032 | 1.63E-13   |
| 2.38E-14   | 0.44590045 | 2.01E-10   | -0.7633378 | 1.44E-36 | -0.5689253 | 2.95E-17   |
| 1.04E-28   | -0.5156357 | 5.88E-14   | 0.9274317  | 4.33E-80 | 0.66108101 | 1.31E-24   |
| 1.49E-45   | 0.45635588 | 6.65E-11   | -0.6640748 | 6.82E-25 | -0.5213097 | 2.79E-14   |
| 2.02E-06   | -0.3227277 | 7.45E-06   | 0.63877562 | 1.34E-22 | 0.41761822 | 3.33E-09   |
| 1.31E-19   | 0.32838985 | 5.03E-06   | -0.7018946 | 9.05E-29 | -0.5533327 | 3.13E-16   |
| 1.85E-13   | -0.4304257 | 9.65E-10   | 0.8145228  | 3.83E-45 | 0.61438992 | 1.39E-20   |
| 9.05E-33   | -0.5988084 | 2.20E-19   | 0.74606745 | 3.77E-34 | 0.47535771 | 8.07E-12   |
| 9.51E-50   | -0.5142727 | 7.02E-14   | 0.92078481 | 9.66E-77 | 0.62270579 | 2.99E-21   |
| 1.61E-05   | -0.2948271 | 4.62E-05   | 0.61679452 | 8.96E-21 | 0.43756613 | 4.72E-10   |

|            |            |            |            |           |            |            |
|------------|------------|------------|------------|-----------|------------|------------|
| 9.21E-18   | -0.3935538 | 2.99E-08   | 0.71676622 | 1.82E-30  | 0.26429263 | 0.0002777  |
| 1.18E-16   | -0.4891406 | 1.61E-12   | 0.84038268 | 1.46E-50  | 0.65916288 | 1.98E-24   |
| 1.63E-25   | -0.3297342 | 4.58E-06   | 0.7219918  | 4.34E-31  | 0.38598943 | 5.76E-08   |
| 9.56E-19   | 0.47380305 | 9.64E-12   | -0.7226653 | 3.60E-31  | -0.1618065 | 0.02777784 |
| 2.08E-40   | 0.39431171 | 2.80E-08   | -0.7512023 | 7.55E-35  | -0.4850348 | 2.62E-12   |
| 3.60E-13   | 0.3190058  | 9.61E-06   | -0.6500943 | 1.34E-23  | -0.7351509 | 1.01E-32   |
| 3.84E-09   | -0.402709  | 1.33E-08   | 0.67522558 | 5.63E-26  | 0.52591421 | 1.50E-14   |
| 3.92E-38   | -0.3519736 | 8.97E-07   | 0.63319352 | 4.02E-22  | 0.2053019  | 0.00505659 |
| 5.59E-08   | 0.33693161 | 2.74E-06   | -0.6825409 | 1.03E-26  | -0.5786128 | 6.36E-18   |
| 2.11E-12   | -0.4894642 | 1.55E-12   | 0.76928622 | 1.89E-37  | 0.25866002 | 0.00037797 |
| 1.17E-37   | -0.5170289 | 4.90E-14   | 0.92068561 | 1.08E-76  | 0.70023591 | 1.38E-28   |
| 2.51E-46   | -0.569321  | 2.77E-17   | 0.95176945 | 7.75E-96  | 0.78598255 | 4.53E-40   |
| 6.75E-20   | -0.4299327 | 1.01E-09   | 0.70272797 | 7.32E-29  | 0.14570444 | 0.04782322 |
| 1.06E-11   | -0.4429209 | 2.73E-10   | 0.47625277 | 7.29E-12  | 0.15910909 | 0.03052201 |
| 4.53E-26   | 0.37224626 | 1.81E-07   | -0.6770835 | 3.68E-26  | -0.3015963 | 3.02E-05   |
| 7.08E-16   | -0.4754392 | 8.00E-12   | 0.84398097 | 2.16E-51  | 0.67297567 | 9.39E-26   |
| 5.01E-23   | 0.26981959 | 0.00020385 | -0.7198133 | 7.92E-31  | -0.3717106 | 1.89E-07   |
| 7.28E-11   | -0.3632619 | 3.73E-07   | 0.79971504 | 2.08E-42  | 0.49770272 | 5.70E-13   |
| 2.70E-22   | -0.4869418 | 2.09E-12   | 0.87120334 | 1.93E-58  | 0.53814534 | 2.79E-15   |
| 7.15E-09   | 0.38148958 | 8.43E-08   | -0.6707415 | 1.55E-25  | -0.559903  | 1.18E-16   |
| 1.15E-21   | 0.66328874 | 8.09E-25   | -0.8360113 | 1.40E-49  | -0.3686726 | 2.42E-07   |
| 8.30E-25   | -0.3727428 | 1.74E-07   | 0.81442423 | 4.00E-45  | 0.81637827 | 1.67E-45   |
| 1.05E-21   | 0.38896879 | 4.46E-08   | -0.626005  | 1.60E-21  | -0.7040181 | 5.26E-29   |
| 3.28E-30   | -0.6295634 | 8.12E-22   | 0.93258352 | 6.51E-83  | 0.64181104 | 7.29E-23   |
| 1.46E-11   | 0.33974066 | 2.23E-06   | -0.5493731 | 5.60E-16  | -0.5670826 | 3.92E-17   |
| 2.04E-10   | -0.4776836 | 6.18E-12   | 0.75048859 | 9.46E-35  | 0.64198632 | 7.04E-23   |
| 2.90E-41   | -0.5936693 | 5.30E-19   | 0.96510989 | 1.94E-108 | 0.6715502  | 1.30E-25   |
| 5.05E-18   | -0.3895029 | 4.26E-08   | 0.77343279 | 4.44E-38  | 0.38030907 | 9.31E-08   |
| 5.92E-17   | -0.3190724 | 9.57E-06   | 0.70247434 | 7.81E-29  | 0.41510853 | 4.23E-09   |
| 1.08E-05   | -0.4617629 | 3.70E-11   | 0.56495282 | 5.45E-17  | 0.720232   | 7.06E-31   |
| 2.69E-63   | -0.4698542 | 1.51E-11   | 0.92932588 | 4.20E-81  | 0.64952497 | 1.51E-23   |
| 0.00286094 | 0.45341665 | 9.10E-11   | -0.5104818 | 1.14E-13  | -0.4877256 | 1.91E-12   |
| 9.87E-36   | -0.4414505 | 3.18E-10   | 0.64069132 | 9.13E-23  | 0.26427657 | 0.00027795 |
| 9.43E-35   | -0.5475171 | 7.34E-16   | 0.90661265 | 1.73E-70  | 0.66220969 | 1.02E-24   |
| 2.50E-15   | 0.37744998 | 1.18E-07   | -0.6622628 | 1.01E-24  | -0.3376537 | 2.60E-06   |
| 1.05E-14   | -0.520307  | 3.18E-14   | 0.69417075 | 6.27E-28  | 0.39106877 | 3.72E-08   |
| 8.40E-42   | -0.2225209 | 0.00233176 | 0.70607874 | 3.09E-29  | 0.24907904 | 0.00062869 |
| 1.20E-44   | -0.3668551 | 2.80E-07   | 0.80499829 | 2.34E-43  | 0.34704517 | 1.30E-06   |
| 1.67E-15   | 0.37118215 | 1.98E-07   | -0.8105906 | 2.15E-44  | -0.4450641 | 2.19E-10   |
| 5.09E-22   | -0.4831091 | 3.29E-12   | 0.86374739 | 2.32E-56  | 0.77984121 | 4.43E-39   |
| 1.19E-12   | 0.27837235 | 0.00012469 | -0.7542854 | 2.82E-35  | -0.6475854 | 2.25E-23   |
| 3.08E-18   | -0.1301441 | 0.07745118 | 0.66990267 | 1.88E-25  | 0.32714839 | 5.49E-06   |
| 5.12E-17   | 0.3004496  | 3.25E-05   | -0.5743674 | 1.25E-17  | -0.7787061 | 6.71E-39   |
| 1.99E-36   | -0.3302324 | 4.42E-06   | 0.61669296 | 9.13E-21  | 0.18515276 | 0.01163137 |
| 1.98E-51   | -0.4134056 | 4.96E-09   | 0.7761534  | 1.68E-38  | 0.33781484 | 2.57E-06   |
| 4.99E-05   | -0.3740492 | 1.56E-07   | 0.65532028 | 4.49E-24  | 0.37296038 | 1.71E-07   |

|            |            |            |            |           |            |            |
|------------|------------|------------|------------|-----------|------------|------------|
| 5.21E-12   | -0.4657795 | 2.37E-11   | 0.77515859 | 2.40E-38  | 0.73447417 | 1.24E-32   |
| 8.22E-46   | -0.5902003 | 9.51E-19   | 0.96597866 | 2.01E-109 | 0.69621231 | 3.78E-28   |
| 8.60E-15   | -0.2122258 | 0.0037301  | 0.72173265 | 4.66E-31  | 0.70186615 | 9.12E-29   |
| 2.64E-20   | 0.20064571 | 0.0061723  | -0.5035655 | 2.75E-13  | -0.2138722 | 0.00346498 |
| 1.67E-34   | -0.5025929 | 3.11E-13   | 0.86891571 | 8.64E-58  | 0.85861989 | 5.33E-55   |
| 5.29E-60   | 0.48727109 | 2.01E-12   | -0.7095578 | 1.25E-29  | -0.4135822 | 4.88E-09   |
| 8.19E-35   | -0.5345537 | 4.61E-15   | 0.89860312 | 2.21E-67  | 0.59134647 | 7.84E-19   |
| 5.40E-32   | -0.3310764 | 4.16E-06   | 0.55308928 | 3.25E-16  | 0.12146753 | 0.0995491  |
| 6.02E-19   | 0.31062111 | 1.68E-05   | -0.7998397 | 1.98E-42  | -0.4251959 | 1.61E-09   |
| 1.61E-29   | 0.41909966 | 2.90E-09   | -0.7497825 | 1.18E-34  | -0.4563397 | 6.66E-11   |
| 5.20E-44   | -0.572793  | 1.61E-17   | 0.86996176 | 4.37E-58  | 0.56599509 | 4.64E-17   |
| 2.57E-34   | -0.5117771 | 9.69E-14   | 0.91639752 | 1.09E-74  | 0.62173575 | 3.58E-21   |
| 0.37495291 | -0.2506526 | 0.00057906 | 0.35283928 | 8.39E-07  | -0.0219483 | 0.76681699 |
| 6.45E-27   | -0.3548604 | 7.19E-07   | 0.60407192 | 8.81E-20  | 0.08556591 | 0.24683989 |
| 0.81995344 | -0.3358063 | 2.97E-06   | 0.44568681 | 2.05E-10  | 0.08903235 | 0.22814233 |
| 2.41E-29   | 0.63006167 | 7.37E-22   | -0.7498592 | 1.15E-34  | -0.548553  | 6.31E-16   |
| 1.87E-12   | 0.59720374 | 2.90E-19   | -0.637841  | 1.61E-22  | -0.3648961 | 3.28E-07   |
| 0.06626023 | -0.209822  | 0.00415006 | 0.50793115 | 1.59E-13  | 0.37365763 | 1.62E-07   |
| 2.75E-74   | -0.5120969 | 9.30E-14   | 0.8531373  | 1.33E-53  | 0.51236185 | 8.99E-14   |
| 3.07E-08   | -0.3654936 | 3.13E-07   | 0.6650184  | 5.54E-25  | 0.2483941  | 0.0006515  |
| 4.91E-75   | -0.5651363 | 5.30E-17   | 0.87623219 | 6.40E-60  | 0.63720552 | 1.83E-22   |
| 5.17E-19   | -0.4937853 | 9.20E-13   | 0.76944925 | 1.79E-37  | 0.35287936 | 8.37E-07   |
| 3.78E-43   | 0.44655336 | 1.88E-10   | -0.8562548 | 2.17E-54  | -0.5578461 | 1.60E-16   |
| 0.00389847 | 0.18460217 | 0.01188636 | -0.5532765 | 3.16E-16  | 0.05156173 | 0.48578664 |
| 4.45E-18   | -0.6211413 | 4.00E-21   | 0.82509109 | 3.00E-47  | 0.62554579 | 1.75E-21   |
| 6.98E-08   | -0.3012098 | 3.10E-05   | 0.55092825 | 4.47E-16  | 0.50648709 | 1.90E-13   |
| 4.95E-22   | -0.4833361 | 3.20E-12   | 0.55247269 | 3.56E-16  | 0.70545807 | 3.63E-29   |
| 0.06820414 | -0.3948819 | 2.66E-08   | 0.53465933 | 4.54E-15  | 0.47597935 | 7.52E-12   |
| 1.81E-15   | 0.63153251 | 5.55E-22   | -0.5960465 | 3.54E-19  | -0.5102348 | 1.18E-13   |
| 0.09291735 | 0.68525139 | 5.43E-27   | -0.4932104 | 9.86E-13  | -0.3165358 | 1.14E-05   |
| 4.69E-37   | -0.5079072 | 1.59E-13   | 0.8562821  | 2.14E-54  | 0.37554266 | 1.38E-07   |
| 3.13E-08   | 0.51828414 | 4.15E-14   | -0.6669239 | 3.64E-25  | -0.7346364 | 1.18E-32   |
| 1.05E-27   | 0.18836905 | 0.01023582 | -0.6285931 | 9.78E-22  | -0.5465061 | 8.49E-16   |
| 3.54E-63   | -0.479136  | 5.23E-12   | 0.91342118 | 2.33E-73  | 0.50591182 | 2.05E-13   |
| 1.32E-07   | 0.54047569 | 2.01E-15   | -0.7215362 | 4.92E-31  | -0.2756069 | 0.00014642 |
| 4.97E-13   | 0.28951369 | 6.41E-05   | -0.5231733 | 2.17E-14  | -0.2844353 | 8.71E-05   |
| 2.26E-06   | -0.3170794 | 1.09E-05   | 0.55361837 | 3.01E-16  | -0.0629818 | 0.3943894  |
| 6.87E-26   | 0.11214591 | 0.12855899 | -0.5181035 | 4.25E-14  | -0.4310197 | 9.10E-10   |
| 4.66E-35   | -0.3102245 | 1.73E-05   | 0.72988735 | 4.68E-32  | 0.26307701 | 0.00029698 |
| 6.73E-49   | -0.4751464 | 8.27E-12   | 0.9023861  | 8.13E-69  | 0.60442719 | 8.28E-20   |
| 0.00219805 | 0.12669572 | 0.08570543 | -0.4744453 | 8.96E-12  | -0.4761315 | 7.39E-12   |
| 2.80E-24   | -0.5296145 | 9.10E-15   | 0.73273212 | 2.05E-32  | 0.37916968 | 1.02E-07   |
| 1.00E-16   | -0.3910539 | 3.72E-08   | 0.75792973 | 8.65E-36  | 0.18609393 | 0.01120662 |
| 9.11E-13   | -0.4669493 | 2.08E-11   | 0.75518378 | 2.11E-35  | 0.30943465 | 1.82E-05   |
| 3.15E-43   | -0.5131703 | 8.10E-14   | 0.88551176 | 7.96E-63  | 0.40810361 | 8.11E-09   |
| 1.33E-75   | -0.5872604 | 1.55E-18   | 0.86253023 | 4.94E-56  | 0.54877622 | 6.11E-16   |

|            |            |            |            |           |            |            |
|------------|------------|------------|------------|-----------|------------|------------|
| 1.48E-66   | -0.4572629 | 6.03E-11   | 0.85081351 | 5.00E-53  | 0.5403588  | 2.04E-15   |
| 1.04E-41   | -0.4886549 | 1.71E-12   | 0.82606303 | 1.89E-47  | 0.382742   | 7.59E-08   |
| 1.61E-54   | -0.522628  | 2.34E-14   | 0.97235291 | 1.53E-117 | 0.75241686 | 5.13E-35   |
| 0.00026491 | 0.03259017 | 0.659657   | -0.4408896 | 3.37E-10  | -0.0857326 | 0.24591726 |
| 2.97E-24   | 0.12667117 | 0.08576664 | -0.4264135 | 1.43E-09  | -0.1692733 | 0.02125587 |
| 8.36E-23   | -0.4341971 | 6.63E-10   | 0.72791351 | 8.22E-32  | 0.56572164 | 4.84E-17   |
| 4.03E-23   | 0.44085727 | 3.38E-10   | -0.7465771 | 3.22E-34  | -0.6351538 | 2.74E-22   |
| 4.62E-15   | 0.50752594 | 1.67E-13   | -0.6132594 | 1.71E-20  | -0.4020775 | 1.40E-08   |
| 1.89E-09   | -0.499001  | 4.85E-13   | 0.55198966 | 3.82E-16  | 0.57741788 | 7.71E-18   |
| 1.18E-19   | -0.3397991 | 2.22E-06   | 0.74114943 | 1.69E-33  | 0.19807678 | 0.00687774 |
| 0.03426386 | 0.08067168 | 0.27501044 | -0.3278126 | 5.24E-06  | -0.199492  | 0.00648069 |
| 2.95E-11   | -0.3426651 | 1.80E-06   | 0.660988   | 1.33E-24  | 0.21532043 | 0.00324598 |
| 9.94E-35   | 0.2244388  | 0.00213139 | -0.6625038 | 9.60E-25  | -0.3641484 | 3.48E-07   |
| 9.00E-07   | 0.25254495 | 0.00052417 | -0.5010814 | 3.75E-13  | -0.5573086 | 1.74E-16   |
| 4.93E-11   | -0.3187049 | 9.81E-06   | 0.50214798 | 3.28E-13  | 0.54069397 | 1.95E-15   |
| 9.83E-30   | -0.5958705 | 3.65E-19   | 0.81166519 | 1.35E-44  | 0.61619452 | 1.00E-20   |
| 0.30904653 | 0.09655037 | 0.19108277 | -0.3162309 | 1.16E-05  | -0.5897349 | 1.03E-18   |
| 3.26E-23   | 0.50466583 | 2.40E-13   | -0.7160704 | 2.20E-30  | -0.1282536 | 0.08189303 |
| 3.52E-58   | -0.4526483 | 9.88E-11   | 0.81631672 | 1.72E-45  | 0.60969023 | 3.25E-20   |
| 4.46E-24   | 0.316747   | 1.12E-05   | -0.5060261 | 2.02E-13  | -0.1475078 | 0.0451024  |
| 7.68E-07   | 0.30481668 | 2.46E-05   | -0.5667415 | 4.14E-17  | -0.6743136 | 6.93E-26   |
| 4.57E-13   | 0.45421788 | 8.36E-11   | -0.6506661 | 1.19E-23  | -0.5948631 | 4.33E-19   |
| 4.76E-44   | -0.3207244 | 8.55E-06   | 0.78635077 | 3.94E-40  | 0.43180059 | 8.42E-10   |
| 2.02E-45   | -0.4265935 | 1.41E-09   | 0.73626129 | 7.30E-33  | 0.27237785 | 0.00017627 |
| 1.20E-37   | -0.4523072 | 1.02E-10   | 0.83902646 | 2.97E-50  | 0.43506823 | 6.07E-10   |
| 1.68E-08   | 0.43173721 | 8.47E-10   | -0.709404  | 1.30E-29  | -0.0869845 | 0.23906345 |
| 3.29E-63   | -0.5168485 | 5.02E-14   | 0.80060965 | 1.44E-42  | 0.49491975 | 8.01E-13   |
| 1.33E-22   | -0.5076707 | 1.64E-13   | 0.88890521 | 5.95E-64  | 0.69450703 | 5.77E-28   |
| 1.15E-52   | -0.4708203 | 1.35E-11   | 0.84391791 | 2.24E-51  | 0.35141849 | 9.35E-07   |
| 2.48E-13   | 0.63273158 | 4.40E-22   | -0.7436246 | 7.98E-34  | -0.46439   | 2.77E-11   |
| 3.70E-27   | -0.6594368 | 1.86E-24   | 0.83286445 | 6.85E-49  | 0.60944031 | 3.40E-20   |
| 6.20E-17   | 0.59619807 | 3.45E-19   | -0.5631088 | 7.22E-17  | -0.0916956 | 0.21447342 |
| 8.53E-15   | 0.48588234 | 2.37E-12   | -0.8378431 | 5.49E-50  | -0.5515035 | 4.10E-16   |
| 4.48E-63   | -0.4689894 | 1.66E-11   | 0.91779292 | 2.50E-75  | 0.75365329 | 3.46E-35   |
| 1.09E-12   | 0.57700494 | 8.24E-18   | -0.7877901 | 2.28E-40  | -0.6252425 | 1.85E-21   |
| 2.02E-40   | -0.3872577 | 5.16E-08   | 0.90875574 | 2.28E-71  | 0.73791734 | 4.47E-33   |
| 8.17E-42   | -0.5614168 | 9.35E-17   | 0.93705874 | 1.49E-85  | 0.64941834 | 1.54E-23   |
| 1.92E-11   | 0.61348361 | 1.64E-20   | -0.6560814 | 3.82E-24  | -0.1301933 | 0.07733812 |
| 3.20E-42   | -0.2189548 | 0.00275038 | 0.64377306 | 4.91E-23  | 0.21715689 | 0.00298627 |
| 1.80E-26   | -0.3944262 | 2.77E-08   | 0.45743076 | 5.92E-11  | 0.24084109 | 0.00095883 |
| 3.01E-32   | 0.37986903 | 9.66E-08   | -0.6530287 | 7.27E-24  | -0.7251911 | 1.78E-31   |
| 0.00882567 | -0.2892247 | 6.53E-05   | 0.42468928 | 1.69E-09  | 0.52961171 | 9.11E-15   |
| 1.42E-07   | -0.4535032 | 9.02E-11   | 0.57563794 | 1.02E-17  | 0.43492677 | 6.16E-10   |
| 3.30E-11   | -0.4200988 | 2.63E-09   | 0.74508686 | 5.10E-34  | 0.57630631 | 9.21E-18   |
| 3.26E-12   | -0.3976341 | 2.09E-08   | 0.78942759 | 1.22E-40  | 0.31901832 | 9.60E-06   |
| 1.61E-29   | -0.4884845 | 1.74E-12   | 0.84349857 | 2.80E-51  | 0.3568749  | 6.15E-07   |

|            |            |            |            |          |            |            |
|------------|------------|------------|------------|----------|------------|------------|
| 2.69E-41   | -0.508207  | 1.53E-13   | 0.92315972 | 6.66E-78 | 0.61782191 | 7.41E-21   |
| 6.37E-22   | -0.4561313 | 6.81E-11   | 0.72706959 | 1.04E-31 | 0.2953745  | 4.47E-05   |
| 1.84E-17   | -0.5322325 | 6.36E-15   | 0.72098756 | 5.73E-31 | 0.29937433 | 3.48E-05   |
| 1.03E-45   | -0.468296  | 1.79E-11   | 0.80335359 | 4.65E-43 | 0.32611195 | 5.90E-06   |
| 9.52E-24   | 0.59776327 | 2.64E-19   | -0.7649655 | 8.31E-37 | -0.2464133 | 0.00072182 |
| 1.22E-20   | -0.3623378 | 4.02E-07   | 0.63942286 | 1.18E-22 | 0.29375352 | 4.94E-05   |
| 0.00035982 | -0.3242766 | 6.70E-06   | 0.64409514 | 4.60E-23 | 0.31294259 | 1.44E-05   |
| 7.89E-20   | -0.5364343 | 3.55E-15   | 0.81790607 | 8.40E-46 | 0.57753882 | 7.56E-18   |
| 2.49E-33   | -0.4392664 | 3.97E-10   | 0.81695599 | 1.29E-45 | 0.27161276 | 0.00018413 |
| 4.51E-53   | -0.5784977 | 6.48E-18   | 0.92293993 | 8.56E-78 | 0.58526794 | 2.16E-18   |
| 0.00013461 | 0.33591554 | 2.95E-06   | -0.6667079 | 3.82E-25 | -0.0388486 | 0.59957317 |
| 4.56E-18   | -0.523784  | 2.00E-14   | 0.80765747 | 7.60E-44 | 0.67637843 | 4.32E-26   |
| 0.60043545 | -0.2594853 | 0.00036143 | 0.46098157 | 4.03E-11 | 0.44531679 | 2.13E-10   |
| 5.94E-06   | -0.4317261 | 8.48E-10   | 0.62846556 | 1.00E-21 | 0.71670598 | 1.85E-30   |
| 9.83E-05   | -0.3628398 | 3.86E-07   | 0.66585636 | 4.61E-25 | 0.62482194 | 2.01E-21   |
| 2.33E-05   | -0.2940475 | 4.85E-05   | 0.48902371 | 1.63E-12 | 0.68047395 | 1.67E-26   |
| 3.03E-40   | -0.5885116 | 1.26E-18   | 0.7802933  | 3.76E-39 | 0.28818053 | 6.95E-05   |
| 2.22E-28   | -0.5580135 | 1.56E-16   | 0.82910641 | 4.36E-48 | 0.47737391 | 6.40E-12   |
| 7.98E-38   | 0.36516998 | 3.21E-07   | -0.6826389 | 1.01E-26 | -0.279181  | 0.00011892 |
| 1.51E-36   | -0.4224355 | 2.10E-09   | 0.89901924 | 1.55E-67 | 0.74421538 | 6.66E-34   |
| 8.84E-14   | 0.5518922  | 3.88E-16   | -0.438304  | 4.38E-10 | -0.1665053 | 0.02350025 |
| 2.88E-15   | -0.4523585 | 1.02E-10   | 0.82028325 | 2.84E-46 | 0.58232596 | 3.49E-18   |
| 4.29E-21   | 0.23826362 | 0.00109103 | -0.5380488 | 2.83E-15 | -0.6351419 | 2.74E-22   |
| 5.10E-33   | 0.15366353 | 0.0367705  | -0.5569238 | 1.84E-16 | -0.330016  | 4.49E-06   |
| 2.07E-42   | -0.4758509 | 7.63E-12   | 0.85073605 | 5.23E-53 | 0.47170954 | 1.22E-11   |
| 3.90E-38   | 0.40863489 | 7.72E-09   | -0.7617246 | 2.47E-36 | -0.4062482 | 9.61E-09   |
| 2.15E-52   | -0.3578374 | 5.71E-07   | 0.79678055 | 6.80E-42 | 0.43106451 | 9.06E-10   |
| 1.19E-23   | -0.2690511 | 0.00021289 | 0.52002858 | 3.30E-14 | -0.0224605 | 0.76153695 |
| 3.92E-22   | 0.48115557 | 4.13E-12   | -0.7958814 | 9.74E-42 | -0.4382307 | 4.41E-10   |
| 6.36E-17   | 0.43221199 | 8.08E-10   | -0.8174427 | 1.04E-45 | -0.6230163 | 2.82E-21   |
| 7.14E-07   | -0.1841484 | 0.01210019 | 0.65996424 | 1.66E-24 | 0.56432681 | 6.00E-17   |
| 8.95E-25   | -0.481892  | 3.79E-12   | 0.87291111 | 6.16E-59 | 0.57833416 | 6.66E-18   |
| 8.37E-23   | 0.52184646 | 2.59E-14   | -0.6756707 | 5.08E-26 | -0.2015076 | 0.00595053 |
| 1.05E-08   | -0.5429692 | 1.41E-15   | 0.76445073 | 9.89E-37 | 0.62112129 | 4.02E-21   |
| 3.76E-13   | 0.32464923 | 6.53E-06   | -0.5958835 | 3.64E-19 | -0.1035982 | 0.1605227  |
| 2.43E-13   | 0.33736089 | 2.65E-06   | -0.7188057 | 1.04E-30 | -0.0703827 | 0.34109617 |
| 1.16E-25   | 0.2913813  | 5.72E-05   | -0.7075412 | 2.11E-29 | -0.3184541 | 9.98E-06   |
| 2.54E-35   | 0.27782694 | 0.00012872 | -0.7753131 | 2.28E-38 | -0.4423916 | 2.89E-10   |
| 3.90E-48   | 0.42863    | 1.15E-09   | -0.7349943 | 1.06E-32 | -0.3557058 | 6.74E-07   |
| 3.99E-12   | -0.4381042 | 4.47E-10   | 0.63371021 | 3.63E-22 | 0.29064702 | 5.98E-05   |
| 4.96E-25   | -0.4221907 | 2.15E-09   | 0.83311625 | 6.04E-49 | 0.3048718  | 2.45E-05   |
| 1.06E-11   | 0.72262739 | 3.64E-31   | -0.6574767 | 2.84E-24 | -0.6544447 | 5.40E-24   |
| 1.60E-11   | 0.36305739 | 3.79E-07   | -0.5205171 | 3.09E-14 | -0.1160759 | 0.1156204  |
| 2.28E-36   | 0.39859425 | 1.92E-08   | -0.6919371 | 1.08E-27 | -0.567251  | 3.82E-17   |
| 8.54E-05   | 0.40603267 | 9.80E-09   | -0.4964678 | 6.63E-13 | 0.05498725 | 0.45723897 |
| 1.93E-25   | 0.64744321 | 2.32E-23   | -0.7769511 | 1.27E-38 | -0.3658664 | 3.03E-07   |



|            |            |            |            |           |            |            |
|------------|------------|------------|------------|-----------|------------|------------|
| 1.39E-29   | -0.5729788 | 1.56E-17   | 0.92917661 | 5.06E-81  | 0.6331219  | 4.08E-22   |
| 2.35E-19   | -0.47049   | 1.40E-11   | 0.84515105 | 1.15E-51  | 0.70977124 | 1.18E-29   |
| 1.14E-59   | -0.5050925 | 2.27E-13   | 0.91432164 | 9.35E-74  | 0.55314905 | 3.22E-16   |
| 1.11E-12   | 0.28624975 | 7.81E-05   | -0.6645174 | 6.19E-25  | -0.4786387 | 5.54E-12   |
| 0.01097994 | 0.42393237 | 1.82E-09   | -0.654657  | 5.16E-24  | -0.3222829 | 7.69E-06   |
| 4.29E-21   | 0.29140579 | 5.71E-05   | -0.6857484 | 4.83E-27  | -0.6467437 | 2.68E-23   |
| 7.17E-21   | 0.38762981 | 5.00E-08   | -0.7762251 | 1.64E-38  | -0.5540019 | 2.84E-16   |
| 1.40E-21   | 0.48188074 | 3.80E-12   | -0.8520493 | 2.48E-53  | -0.5333091 | 5.48E-15   |
| 2.52E-34   | 0.43903116 | 4.07E-10   | -0.8911903 | 9.91E-65  | -0.4308365 | 9.26E-10   |
| 0.02519002 | -0.2635537 | 0.00028928 | 0.5528556  | 3.36E-16  | 0.30346526 | 2.68E-05   |
| 2.71E-20   | -0.4680787 | 1.84E-11   | 0.61590557 | 1.05E-20  | 0.41203693 | 5.63E-09   |
| 6.89E-51   | -0.4118906 | 5.71E-09   | 0.71068216 | 9.27E-30  | 0.53318575 | 5.57E-15   |
| 3.15E-09   | -0.2729387 | 0.00017071 | 0.56536704 | 5.11E-17  | 0.66768659 | 3.07E-25   |
| 1.92E-16   | -0.5651691 | 5.27E-17   | 0.79441995 | 1.74E-41  | 0.41286458 | 5.22E-09   |
| 4.04E-45   | -0.5306666 | 7.88E-15   | 0.96192555 | 4.96E-105 | 0.73399092 | 1.42E-32   |
| 6.18E-59   | -0.5529695 | 3.31E-16   | 0.83957113 | 2.24E-50  | 0.42908234 | 1.10E-09   |
| 1.70E-31   | 0.33818206 | 2.50E-06   | -0.6288251 | 9.35E-22  | -0.4972752 | 6.00E-13   |
| 1.70E-48   | -0.6138323 | 1.54E-20   | 0.94840548 | 3.18E-93  | 0.61957169 | 5.36E-21   |
| 5.60E-32   | -0.446022  | 1.98E-10   | 0.85945455 | 3.23E-55  | 0.63463868 | 3.03E-22   |
| 1.83E-18   | -0.3029432 | 2.77E-05   | 0.74812777 | 1.98E-34  | 0.35655382 | 6.31E-07   |
| 4.50E-18   | 0.35805843 | 5.61E-07   | -0.6362608 | 2.20E-22  | -0.7462059 | 3.61E-34   |
| 5.20E-40   | 0.15647223 | 0.03342454 | -0.6060519 | 6.21E-20  | -0.4238851 | 1.83E-09   |
| 5.35E-08   | 0.35364742 | 7.89E-07   | -0.6265383 | 1.45E-21  | -0.5751171 | 1.11E-17   |
| 1.58E-21   | -0.0637526 | 0.3886161  | 0.42907371 | 1.10E-09  | 0.09643987 | 0.19159356 |
| 0.00049838 | 0.39609845 | 2.39E-08   | -0.5677148 | 3.56E-17  | -0.0248577 | 0.73697512 |
| 1.12E-18   | -0.4804151 | 4.50E-12   | 0.79058656 | 7.79E-41  | 0.49449977 | 8.43E-13   |
| 3.58E-33   | -0.554496  | 2.64E-16   | 0.81829731 | 7.03E-46  | 0.6688422  | 2.38E-25   |
| 3.87E-12   | 0.30057969 | 3.22E-05   | -0.5824547 | 3.42E-18  | -0.5818881 | 3.75E-18   |
| 9.37E-11   | 0.42163992 | 2.27E-09   | -0.7668171 | 4.43E-37  | -0.4245825 | 1.71E-09   |
| 1.17E-38   | -0.5873429 | 1.53E-18   | 0.9533648  | 3.84E-97  | 0.7313867  | 3.04E-32   |
| 6.13E-32   | 0.36825289 | 2.51E-07   | -0.6767942 | 3.93E-26  | -0.6097066 | 3.24E-20   |
| 7.50E-09   | 0.74455913 | 5.99E-34   | -0.7452204 | 4.89E-34  | -0.3693069 | 2.30E-07   |
| 0.00022124 | 0.21623642 | 0.00311399 | -0.5392884 | 2.38E-15  | -0.3821108 | 8.00E-08   |
| 1.55E-14   | 0.56859797 | 3.10E-17   | -0.6996749 | 1.59E-28  | -0.2836889 | 9.11E-05   |
| 8.67E-11   | 0.78370078 | 1.07E-39   | -0.6062448 | 6.00E-20  | -0.1606231 | 0.02895465 |
| 4.42E-21   | -0.5371468 | 3.21E-15   | 0.87983208 | 5.10E-61  | 0.71314413 | 4.82E-30   |
| 0.00433549 | -0.3474506 | 1.26E-06   | 0.44696748 | 1.80E-10  | 0.54582792 | 9.37E-16   |
| 7.91E-08   | -0.2854587 | 8.20E-05   | 0.65480319 | 5.00E-24  | 0.57418157 | 1.29E-17   |
| 1.03E-18   | -0.4064735 | 9.41E-09   | 0.65992315 | 1.68E-24  | 0.72831228 | 7.34E-32   |
| 6.08E-10   | 0.7555327  | 1.89E-35   | -0.7367566 | 6.30E-33  | -0.3891433 | 4.39E-08   |
| 1.06E-33   | -0.563549  | 6.75E-17   | 0.89542816 | 3.19E-66  | 0.69208554 | 1.05E-27   |
| 6.82E-14   | -0.5373119 | 3.14E-15   | 0.69094146 | 1.38E-27  | 0.25619316 | 0.00043168 |
| 8.38E-30   | -0.3314728 | 4.05E-06   | 0.57750222 | 7.61E-18  | 0.43638365 | 5.32E-10   |
| 4.57E-33   | 0.41218351 | 5.56E-09   | -0.7451757 | 4.96E-34  | -0.4661909 | 2.27E-11   |
| 1.24E-22   | -0.1459006 | 0.04752081 | 0.68109411 | 1.45E-26  | 0.2120288  | 0.00376302 |
| 4.25E-20   | -0.3893957 | 4.30E-08   | 0.70053669 | 1.28E-28  | 0.21287438 | 0.00362355 |

|            |            |            |            |          |            |            |
|------------|------------|------------|------------|----------|------------|------------|
| 2.44E-22   | -0.3783336 | 1.10E-07   | 0.69359285 | 7.23E-28 | 0.32484289 | 6.44E-06   |
| 2.85E-16   | 0.30410407 | 2.57E-05   | -0.6514316 | 1.02E-23 | -0.8058287 | 1.65E-43   |
| 4.90E-35   | -0.3380102 | 2.53E-06   | 0.82518847 | 2.87E-47 | 0.60467524 | 7.92E-20   |
| 1.71E-06   | -0.6374294 | 1.75E-22   | 0.5765286  | 8.89E-18 | 0.50526153 | 2.22E-13   |
| 3.70E-16   | 0.37010548 | 2.16E-07   | -0.6443173 | 4.39E-23 | -0.4581896 | 5.45E-11   |
| 5.76E-14   | -0.3776676 | 1.16E-07   | 0.67471529 | 6.32E-26 | 0.09098379 | 0.21806789 |
| 1.96E-39   | -0.5060381 | 2.02E-13   | 0.92387826 | 2.91E-78 | 0.52676843 | 1.34E-14   |
| 5.13E-16   | -0.4567501 | 6.37E-11   | 0.67995324 | 1.89E-26 | 0.65030849 | 1.28E-23   |
| 3.90E-09   | 0.33357518 | 3.48E-06   | -0.6591495 | 1.98E-24 | -0.4546543 | 7.98E-11   |
| 2.44E-23   | -0.3569435 | 6.12E-07   | 0.75700702 | 1.17E-35 | 0.44511083 | 2.18E-10   |
| 3.39E-16   | 0.52774017 | 1.17E-14   | -0.5879512 | 1.38E-18 | -0.3926543 | 3.24E-08   |
| 0.01291985 | 0.17849248 | 0.01506309 | -0.4380416 | 4.50E-10 | 0.27536471 | 0.00014849 |
| 1.81E-05   | -0.2710994 | 0.00018959 | 0.41047272 | 6.51E-09 | 0.03984097 | 0.59027555 |
| 1.68E-42   | 0.34929196 | 1.10E-06   | -0.8436125 | 2.64E-51 | -0.6446612 | 4.10E-23   |
| 2.82E-30   | 0.59676399 | 3.13E-19   | -0.8350033 | 2.34E-49 | -0.8010778 | 1.19E-42   |
| 1.06E-24   | 0.55030177 | 4.89E-16   | -0.8956716 | 2.61E-66 | -0.5391223 | 2.43E-15   |
| 0.00115974 | -0.4221504 | 2.16E-09   | 0.51263632 | 8.67E-14 | 0.3303321  | 4.39E-06   |
| 1.86E-18   | -0.34771   | 1.24E-06   | 0.69636066 | 3.64E-28 | 0.09747367 | 0.18685351 |
| 8.51E-08   | 0.41518564 | 4.20E-09   | -0.5713815 | 2.01E-17 | -0.6675904 | 3.14E-25   |
| 6.96E-05   | 0.51689891 | 4.98E-14   | -0.7082886 | 1.74E-29 | -0.2328657 | 0.00142363 |
| 1.61E-67   | -0.4017604 | 1.44E-08   | 0.82077511 | 2.26E-46 | 0.5736843  | 1.40E-17   |
| 2.39E-50   | -0.533516  | 5.32E-15   | 0.8449473  | 1.28E-51 | 0.39199457 | 3.43E-08   |
| 3.46E-27   | -0.3933378 | 3.05E-08   | 0.60334258 | 1.00E-19 | 0.17929048 | 0.01460997 |
| 5.29E-16   | -0.4940152 | 8.94E-13   | 0.81884455 | 5.48E-46 | 0.56120419 | 9.65E-17   |
| 2.00E-08   | 0.43767829 | 4.67E-10   | -0.7662161 | 5.43E-37 | -0.2622217 | 0.00031128 |
| 1.72E-11   | 0.30706588 | 2.12E-05   | -0.5720881 | 1.80E-17 | -0.7037128 | 5.69E-29   |
| 5.04E-15   | 0.3205133  | 8.67E-06   | -0.7154601 | 2.59E-30 | -0.6798366 | 1.94E-26   |
| 7.39E-22   | -0.2163687 | 0.00309534 | 0.79253044 | 3.66E-41 | 0.48719332 | 2.03E-12   |
| 1.35E-19   | 0.17537265 | 0.0169545  | -0.4725451 | 1.11E-11 | -0.1897198 | 0.00969525 |
| 6.44E-33   | -0.1895488 | 0.00976226 | 0.62537601 | 1.81E-21 | 0.32613313 | 5.89E-06   |
| 4.79E-18   | -0.4216649 | 2.27E-09   | 0.60395485 | 8.99E-20 | 0.22586992 | 0.00199222 |
| 4.12E-28   | -0.562626  | 7.78E-17   | 0.90986115 | 7.88E-72 | 0.80130191 | 1.09E-42   |
| 0.17075879 | 0.60153667 | 1.37E-19   | -0.4715096 | 1.25E-11 | -0.2439426 | 0.00081931 |
| 2.59E-33   | 0.76877066 | 2.26E-37   | -0.8430064 | 3.65E-51 | -0.4920422 | 1.14E-12   |
| 1.40E-38   | 0.39925471 | 1.81E-08   | -0.6877504 | 2.99E-27 | -0.5632127 | 7.11E-17   |
| 7.08E-34   | 0.24782099 | 0.00067116 | -0.636576  | 2.07E-22 | -0.1628066 | 0.02681542 |
| 0.0004207  | 0.26189976 | 0.00031682 | -0.4504443 | 1.25E-10 | -0.4878158 | 1.89E-12   |
| 6.15E-06   | 0.25009575 | 0.0005962  | -0.4979561 | 5.52E-13 | -0.5199314 | 3.34E-14   |
| 4.25E-15   | 0.48116841 | 4.13E-12   | -0.687857  | 2.91E-27 | -0.6139176 | 1.52E-20   |
| 6.22E-28   | -0.259901  | 0.00035336 | 0.72985238 | 4.72E-32 | 0.5594046  | 1.27E-16   |
| 2.55E-09   | -0.3934394 | 3.02E-08   | 0.58831838 | 1.30E-18 | 0.49522664 | 7.72E-13   |
| 6.85E-24   | -0.4899005 | 1.47E-12   | 0.85194056 | 2.64E-53 | 0.75178525 | 6.27E-35   |
| 3.35E-27   | -0.4183975 | 3.10E-09   | 0.79407881 | 1.99E-41 | 0.38971019 | 4.18E-08   |
| 5.46E-17   | 0.36828278 | 2.50E-07   | -0.7380171 | 4.34E-33 | -0.3915035 | 3.58E-08   |
| 7.33E-25   | 0.3618761  | 4.16E-07   | -0.5880732 | 1.36E-18 | -0.4022419 | 1.38E-08   |
| 0.00078518 | -0.4341518 | 6.66E-10   | 0.51299939 | 8.28E-14 | 0.03252862 | 0.66025972 |

|            |            |            |            |            |            |            |
|------------|------------|------------|------------|------------|------------|------------|
| 4.13E-28   | -0.4668417 | 2.11E-11   | 0.89727213 | 6.84E-67   | 0.70799332 | 1.88E-29   |
| 2.20E-25   | 0.30591788 | 2.29E-05   | -0.7158239 | 2.35E-30   | -0.403536  | 1.23E-08   |
| 3.09E-21   | 0.06336029 | 0.39154809 | -0.4781716 | 5.84E-12   | -0.3147161 | 1.28E-05   |
| 3.43E-16   | -0.1201801 | 0.10321609 | 0.55372462 | 2.96E-16   | 0.3326351  | 3.73E-06   |
| 2.28E-19   | -0.4510566 | 1.17E-10   | 0.4446299  | 2.29E-10   | 0.04764894 | 0.51953076 |
| 6.36E-17   | -0.5485244 | 6.34E-16   | 0.73817499 | 4.14E-33   | 0.17602391 | 0.01654343 |
| 9.92E-25   | -0.5276355 | 1.19E-14   | 0.85307413 | 1.38E-53   | 0.66805155 | 2.84E-25   |
| 1.53E-32   | -0.4474378 | 1.71E-10   | 0.72040331 | 6.73E-31   | 0.23547442 | 0.00125278 |
| 4.51E-39   | -0.5586687 | 1.42E-16   | 0.83343863 | 5.14E-49   | 0.45856303 | 5.24E-11   |
| 7.84E-43   | -0.5997808 | 1.86E-19   | 0.88157098 | 1.46E-61   | 0.61749852 | 7.87E-21   |
| 7.94E-05   | -0.4028848 | 1.30E-08   | 0.49819779 | 5.36E-13   | 0.29408227 | 4.84E-05   |
| 2.41E-21   | -0.4121496 | 5.58E-09   | 0.70183743 | 9.18E-29   | 0.65897812 | 2.06E-24   |
| 3.32E-16   | -0.546516  | 8.48E-16   | 0.82343241 | 6.56E-47   | 0.3549984  | 7.11E-07   |
| 6.19E-27   | -0.621911  | 3.47E-21   | 0.81986131 | 3.44E-46   | 0.41871698 | 3.00E-09   |
| 1.20E-39   | -0.3607703 | 4.54E-07   | 0.78713459 | 2.93E-40   | 0.27687822 | 0.00013602 |
| 3.87E-49   | -0.5311703 | 7.36E-15   | 0.89388878 | 1.13E-65   | 0.43279493 | 7.63E-10   |
| 6.55E-27   | -0.4425978 | 2.83E-10   | 0.90149155 | 1.80E-68   | 0.5620458  | 8.49E-17   |
| 3.61E-12   | -0.3104357 | 1.70E-05   | 0.6649075  | 5.68E-25   | 0.08214528 | 0.26630864 |
| 4.77E-12   | -0.5108548 | 1.09E-13   | 0.70381281 | 5.54E-29   | 0.70717716 | 2.32E-29   |
| 0.17960414 | -0.0791206 | 0.28437571 | 0.32092419 | 8.43E-06   | 0.11092222 | 0.13280765 |
| 3.51E-32   | -0.3539276 | 7.72E-07   | 0.65998228 | 1.66E-24   | 0.81747458 | 1.02E-45   |
| 5.73E-36   | -0.2375777 | 0.00112893 | 0.73217931 | 2.41E-32   | 0.5499519  | 5.15E-16   |
| 6.71E-22   | 0.26111867 | 0.00033066 | -0.6048287 | 7.71E-20   | -0.1402888 | 0.05682811 |
| 8.67E-22   | -0.0798284 | 0.2800756  | 0.58928514 | 1.11E-18   | 0.12316304 | 0.09487798 |
| 1.15E-23   | -0.5409456 | 1.88E-15   | 0.71346235 | 4.43E-30   | 0.13042023 | 0.07681897 |
| 2.31E-06   | 0.61631418 | 9.78E-21   | -0.3983515 | 1.96E-08   | -0.228257  | 0.00177838 |
| 1.67E-24   | 0.50329529 | 2.85E-13   | -0.8325363 | 8.07E-49   | -0.4353609 | 5.90E-10   |
| 0.58770201 | 0.1157656  | 0.11660351 | -0.2278478 | 0.00181347 | -0.4763816 | 7.18E-12   |
| 7.96E-05   | 0.28384976 | 9.02E-05   | -0.4638851 | 2.93E-11   | -0.4963563 | 6.72E-13   |
| 1.19E-10   | 0.36904913 | 2.35E-07   | -0.6810607 | 1.46E-26   | -0.114365  | 0.12112254 |
| 3.14E-07   | -0.4461484 | 1.96E-10   | 0.66183506 | 1.11E-24   | 0.55143121 | 4.15E-16   |
| 1.82E-22   | -0.4921809 | 1.12E-12   | 0.83582631 | 1.54E-49   | 0.59101658 | 8.29E-19   |
| 1.43E-13   | 0.39149012 | 3.58E-08   | -0.7216267 | 4.80E-31   | -0.2636652 | 0.0002875  |
| 0.21715772 | 0.22863554 | 0.00174645 | -0.4421777 | 2.95E-10   | -0.4721062 | 1.17E-11   |
| 3.02E-35   | 0.46152005 | 3.80E-11   | -0.7552915 | 2.04E-35   | -0.6198434 | 5.10E-21   |
| 2.32E-40   | 0.58451328 | 2.44E-18   | -0.636063  | 2.29E-22   | -0.4307754 | 9.32E-10   |
| 2.96E-16   | -0.4297713 | 1.03E-09   | 0.70008656 | 1.43E-28   | 0.34105218 | 2.03E-06   |
| 9.23E-15   | 0.28496013 | 8.44E-05   | -0.5394991 | 2.31E-15   | -0.6701387 | 1.78E-25   |
| 0.04806696 | 0.48356835 | 3.12E-12   | -0.3248568 | 6.44E-06   | -0.3053964 | 2.37E-05   |
| 1.78E-42   | -0.4274823 | 1.29E-09   | 0.73038734 | 4.05E-32   | 0.37752801 | 1.17E-07   |
| 4.56E-14   | -0.4345546 | 6.40E-10   | 0.81114211 | 1.69E-44   | 0.47897952 | 5.32E-12   |
| 1.07E-33   | -0.601428  | 1.40E-19   | 0.90838979 | 3.24E-71   | 0.60059602 | 1.62E-19   |
| 1.76E-43   | -0.5337994 | 5.12E-15   | 0.73652535 | 6.75E-33   | 0.37958244 | 9.89E-08   |
| 8.52E-22   | -0.5774273 | 7.70E-18   | 0.8839351  | 2.58E-62   | 0.67686119 | 3.87E-26   |
| 2.27E-28   | 0.55292897 | 3.33E-16   | -0.712282  | 6.07E-30   | -0.6379843 | 1.57E-22   |
| 1.98E-36   | -0.4839555 | 2.98E-12   | 0.82437799 | 4.21E-47   | 0.40783749 | 8.31E-09   |

|           |            |            |            |          |            |            |
|-----------|------------|------------|------------|----------|------------|------------|
| 2.71E-43  | -0.5534291 | 3.09E-16   | 0.83264412 | 7.65E-49 | 0.34241559 | 1.83E-06   |
| 9.99E-59  | 0.58506185 | 2.23E-18   | -0.9163481 | 1.15E-74 | -0.5585542 | 1.44E-16   |
| 9.85E-09  | 0.23107339 | 0.00155309 | -0.4569699 | 6.22E-11 | -0.6662765 | 4.20E-25   |
| 2.01E-12  | 0.71852445 | 1.13E-30   | -0.6475149 | 2.29E-23 | -0.6494535 | 1.53E-23   |
| 1.24E-20  | -0.472573  | 1.11E-11   | 0.85500097 | 4.53E-54 | 0.63773249 | 1.65E-22   |
| 7.61E-25  | -0.0316393 | 0.66899206 | -0.455484  | 7.30E-11 | -0.237021  | 0.00116057 |
| 2.50E-34  | -0.2416601 | 0.00092001 | 0.49948348 | 4.57E-13 | 0.1365835  | 0.06376173 |
| 2.93E-21  | 0.45063305 | 1.22E-10   | -0.7947207 | 1.54E-41 | -0.7440955 | 6.91E-34   |
| 1.07E-18  | -0.4461246 | 1.96E-10   | 0.85966751 | 2.84E-55 | 0.44677069 | 1.83E-10   |
| 1.30E-11  | 0.2454688  | 0.00075775 | -0.6027818 | 1.10E-19 | -0.6412519 | 8.16E-23   |
| 6.94E-51  | -0.5329175 | 5.78E-15   | 0.78601595 | 4.47E-40 | 0.50174136 | 3.46E-13   |
| 3.20E-43  | -0.5795159 | 5.50E-18   | 0.95007125 | 1.70E-94 | 0.63421    | 3.29E-22   |
| 4.83E-18  | -0.4943363 | 8.60E-13   | 0.74702136 | 2.80E-34 | 0.42899763 | 1.11E-09   |
| 4.62E-21  | -0.539228  | 2.40E-15   | 0.78980858 | 1.05E-40 | 0.29269711 | 5.28E-05   |
| 9.65E-22  | -0.2621109 | 0.00031318 | 0.62666806 | 1.41E-21 | 0.73601518 | 7.85E-33   |
| 2.54E-38  | 0.27939152 | 0.00011746 | -0.7811276 | 2.77E-39 | -0.4816126 | 3.92E-12   |
| 2.29E-17  | -0.5299175 | 8.73E-15   | 0.81447665 | 3.91E-45 | 0.45524092 | 7.49E-11   |
| 3.20E-15  | 0.47839047 | 5.70E-12   | -0.5543013 | 2.72E-16 | -0.475359  | 8.07E-12   |
| 3.88E-35  | -0.3054343 | 2.36E-05   | 0.652339   | 8.40E-24 | 0.1819806  | 0.01316907 |
| 3.93E-08  | 0.42810314 | 1.21E-09   | -0.7106053 | 9.46E-30 | -0.0546712 | 0.45983274 |
| 6.51E-12  | -0.4993904 | 4.63E-13   | 0.62763617 | 1.17E-21 | 0.17474738 | 0.01735749 |
| 1.13E-38  | -0.4476203 | 1.68E-10   | 0.69795976 | 2.44E-28 | 0.22041533 | 0.00257132 |
| 6.63E-05  | 0.3321071  | 3.87E-06   | -0.6042395 | 8.55E-20 | -0.5218344 | 2.60E-14   |
| 1.09E-07  | -0.1462635 | 0.04696538 | 0.3804381  | 9.21E-08 | 0.01793286 | 0.80856353 |
| 8.49E-15  | 0.32457012 | 6.56E-06   | -0.62124   | 3.93E-21 | -0.7004647 | 1.30E-28   |
| 1.19E-10  | 0.33057369 | 4.31E-06   | -0.5559848 | 2.12E-16 | -0.7335388 | 1.62E-32   |
| 5.55E-33  | 0.30785113 | 2.02E-05   | -0.5908106 | 8.58E-19 | -0.3700595 | 2.17E-07   |
| 4.31E-29  | 0.46656978 | 2.17E-11   | -0.8857012 | 6.90E-63 | -0.5863971 | 1.79E-18   |
| 4.15E-18  | 0.6353568  | 2.63E-22   | -0.6884441 | 2.53E-27 | -0.5150049 | 6.38E-14   |
| 2.22E-13  | 0.47075275 | 1.36E-11   | -0.6170927 | 8.48E-21 | -0.7098458 | 1.16E-29   |
| 7.89E-11  | 0.40652092 | 9.37E-09   | -0.536133  | 3.70E-15 | -0.0815742 | 0.2696584  |
| 9.88E-55  | -0.2039089 | 0.00536973 | 0.70475682 | 4.35E-29 | 0.36231918 | 4.02E-07   |
| 1.32E-31  | -0.3494042 | 1.09E-06   | 0.71309641 | 4.88E-30 | 0.58740264 | 1.51E-18   |
| 6.65E-42  | -0.5315224 | 7.01E-15   | 0.86306879 | 3.54E-56 | 0.72518924 | 1.78E-31   |
| 3.74E-19  | -0.5175051 | 4.60E-14   | 0.82110758 | 1.94E-46 | 0.7928033  | 3.29E-41   |
| 1.92E-09  | -0.3084834 | 1.94E-05   | 0.53938448 | 2.35E-15 | 0.52778765 | 1.17E-14   |
| 2.65E-39  | -0.4013022 | 1.50E-08   | 0.56966193 | 2.63E-17 | 0.31044594 | 1.70E-05   |
| 0.1104741 | 0.23006421 | 0.00163063 | -0.4716923 | 1.22E-11 | 0.16690551 | 0.02316361 |
| 3.71E-35  | 0.29588453 | 4.33E-05   | -0.7792315 | 5.54E-39 | -0.4230759 | 1.98E-09   |
| 2.11E-10  | -0.5307691 | 7.77E-15   | 0.78824069 | 1.92E-40 | 0.53595389 | 3.80E-15   |
| 4.46E-11  | 0.18297912 | 0.01266686 | -0.4867415 | 2.14E-12 | -0.6898557 | 1.80E-27   |
| 7.12E-32  | 0.57305549 | 1.54E-17   | -0.7686216 | 2.38E-37 | -0.5950975 | 4.16E-19   |
| 4.47E-11  | 0.48201021 | 3.74E-12   | -0.7825833 | 1.62E-39 | -0.4004231 | 1.63E-08   |
| 1.27E-16  | 0.40658348 | 9.32E-09   | -0.6878649 | 2.91E-27 | -0.7179627 | 1.31E-30   |
| 7.92E-18  | -0.4479743 | 1.62E-10   | 0.82909792 | 4.38E-48 | 0.73150879 | 2.93E-32   |
| 1.08E-43  | -0.5434608 | 1.32E-15   | 0.7775164  | 1.03E-38 | 0.53001672 | 8.62E-15   |

|            |            |            |            |           |            |            |
|------------|------------|------------|------------|-----------|------------|------------|
| 4.24E-33   | -0.5317368 | 6.81E-15   | 0.90364814 | 2.62E-69  | 0.79088394 | 6.95E-41   |
| 3.96E-25   | -0.4645321 | 2.73E-11   | 0.8168352  | 1.36E-45  | 0.2898029  | 6.30E-05   |
| 2.07E-13   | -0.498832  | 4.96E-13   | 0.63378609 | 3.58E-22  | 0.56261793 | 7.79E-17   |
| 5.36E-31   | -0.3904492 | 3.92E-08   | 0.75256273 | 4.90E-35  | 0.18266372 | 0.01282364 |
| 9.28E-48   | -0.4682313 | 1.81E-11   | 0.73398411 | 1.43E-32  | 0.36816976 | 2.52E-07   |
| 7.97E-13   | 0.34994101 | 1.05E-06   | -0.7493689 | 1.35E-34  | -0.0831515 | 0.26047587 |
| 3.65E-10   | -0.5778776 | 7.16E-18   | 0.78909797 | 1.38E-40  | 0.50230419 | 3.22E-13   |
| 8.22E-47   | -0.5799768 | 5.11E-18   | 0.90809529 | 4.28E-71  | 0.52912755 | 9.73E-15   |
| 1.79E-16   | 0.441501   | 3.16E-10   | -0.621999  | 3.41E-21  | -0.0717285 | 0.3319215  |
| 2.05E-13   | 0.55698453 | 1.82E-16   | -0.546338  | 8.70E-16  | -0.2495039 | 0.00061492 |
| 2.27E-47   | -0.5399188 | 2.18E-15   | 0.97260301 | 6.73E-118 | 0.75693275 | 1.20E-35   |
| 5.93E-11   | -0.3048711 | 2.45E-05   | 0.59466353 | 4.48E-19  | 0.6829279  | 9.42E-27   |
| 2.95E-22   | 0.47732791 | 6.44E-12   | -0.7535665 | 3.55E-35  | -0.6710533 | 1.45E-25   |
| 4.08E-35   | 0.46193652 | 3.63E-11   | -0.7802864 | 3.77E-39  | -0.2702015 | 0.00019949 |
| 9.91E-36   | 0.7337128  | 1.54E-32   | -0.8899644 | 2.61E-64  | -0.729798  | 4.80E-32   |
| 8.07E-07   | -0.3157872 | 1.19E-05   | 0.51548667 | 5.99E-14  | 0.30647277 | 2.21E-05   |
| 3.82E-26   | -0.4618433 | 3.66E-11   | 0.73613655 | 7.57E-33  | 0.79242023 | 3.82E-41   |
| 2.68E-20   | -0.4919515 | 1.15E-12   | 0.67871524 | 2.52E-26  | 0.3123558  | 1.50E-05   |
| 1.07E-13   | 0.70040145 | 1.32E-28   | -0.6092468 | 3.52E-20  | -0.2032102 | 0.00553327 |
| 1.88E-27   | 0.41044258 | 6.53E-09   | -0.8008619 | 1.30E-42  | -0.7996502 | 2.13E-42   |
| 1.99E-27   | 0.68060158 | 1.63E-26   | -0.5594479 | 1.26E-16  | -0.4678144 | 1.89E-11   |
| 3.26E-19   | -0.3150551 | 1.25E-05   | 0.63906842 | 1.26E-22  | 0.09632473 | 0.19212687 |
| 2.66E-07   | 0.33453937 | 3.25E-06   | -0.5128642 | 8.42E-14  | -0.6341347 | 3.34E-22   |
| 3.06E-19   | 0.3103306  | 1.72E-05   | -0.6733665 | 8.59E-26  | -0.6654062 | 5.09E-25   |
| 5.23E-05   | -0.152039  | 0.03883194 | 0.46282767 | 3.29E-11  | 0.18667745 | 0.0109502  |
| 4.71E-10   | 0.3823033  | 7.87E-08   | -0.657779  | 2.66E-24  | -0.4613247 | 3.88E-11   |
| 9.82E-48   | -0.5637575 | 6.54E-17   | 0.88079795 | 2.55E-61  | 0.44247078 | 2.86E-10   |
| 1.94E-26   | -0.3010676 | 3.12E-05   | 0.81013485 | 2.62E-44  | 0.56638761 | 4.37E-17   |
| 1.56E-05   | -0.3710879 | 1.99E-07   | 0.48843184 | 1.75E-12  | 0.20930515 | 0.00424574 |
| 1.19E-11   | -0.4532228 | 9.29E-11   | 0.72038305 | 6.77E-31  | 0.74765906 | 2.30E-34   |
| 2.88E-10   | 0.75608338 | 1.58E-35   | -0.6992879 | 1.75E-28  | -0.6950908 | 4.99E-28   |
| 7.09E-29   | 0.59251305 | 6.44E-19   | -0.8768796 | 4.08E-60  | -0.4877239 | 1.91E-12   |
| 4.36E-09   | -0.1482219 | 0.04406136 | 0.43557747 | 5.77E-10  | -0.1401589 | 0.05706026 |
| 8.87E-31   | -0.3641161 | 3.49E-07   | 0.68694769 | 3.63E-27  | 0.49033792 | 1.39E-12   |
| 3.40E-41   | -0.5347109 | 4.51E-15   | 0.95794796 | 3.67E-101 | 0.68040551 | 1.70E-26   |
| 5.29E-69   | 0.3991445  | 1.82E-08   | -0.7308192 | 3.58E-32  | -0.4744113 | 8.99E-12   |
| 7.15E-21   | 0.55148278 | 4.12E-16   | -0.677364  | 3.45E-26  | -0.3795137 | 9.95E-08   |
| 4.74E-06   | -0.3981197 | 2.00E-08   | 0.66272444 | 9.15E-25  | 0.43926585 | 3.97E-10   |
| 2.13E-37   | -0.5365247 | 3.51E-15   | 0.88796988 | 1.23E-63  | 0.69223072 | 1.01E-27   |
| 0.00143615 | 0.21115647 | 0.00391195 | -0.4444136 | 2.34E-10  | -0.0344172 | 0.64186733 |
| 8.84E-10   | -0.3753658 | 1.40E-07   | 0.61369028 | 1.58E-20  | 0.80335544 | 4.65E-43   |
| 0.00021382 | 0.38428003 | 6.66E-08   | -0.6139629 | 1.50E-20  | -0.2832075 | 9.38E-05   |
| 9.00E-08   | 0.30565481 | 2.33E-05   | -0.660074  | 1.63E-24  | -0.4402537 | 3.59E-10   |
| 1.13E-08   | 0.14754081 | 0.04505377 | -0.5353533 | 4.13E-15  | -0.5194166 | 3.58E-14   |
| 2.30E-15   | -0.5866188 | 1.72E-18   | 0.78928571 | 1.29E-40  | 0.48195234 | 3.77E-12   |
| 1.45E-10   | -0.2519994 | 0.00053948 | 0.65211652 | 8.80E-24  | 0.35966175 | 4.95E-07   |

|            |            |            |            |            |            |            |
|------------|------------|------------|------------|------------|------------|------------|
| 2.37E-35   | 0.74162339 | 1.47E-33   | -0.6499783 | 1.37E-23   | -0.5401187 | 2.12E-15   |
| 0.00104778 | -0.5025209 | 3.14E-13   | 0.64129117 | 8.09E-23   | 0.42334461 | 1.93E-09   |
| 2.46E-23   | -0.6008243 | 1.55E-19   | 0.80980683 | 3.02E-44   | 0.33418522 | 3.34E-06   |
| 3.72E-09   | 0.24281898 | 0.00086754 | -0.5877853 | 1.42E-18   | -0.4974905 | 5.85E-13   |
| 6.82E-17   | 0.66970695 | 1.96E-25   | -0.5187519 | 3.91E-14   | -0.5579841 | 1.57E-16   |
| 2.39E-37   | 0.64825484 | 1.96E-23   | -0.730027  | 4.49E-32   | -0.5917722 | 7.30E-19   |
| 6.06E-13   | -0.4728839 | 1.07E-11   | 0.76392173 | 1.18E-36   | 0.73515702 | 1.01E-32   |
| 8.18E-24   | -0.3894569 | 4.27E-08   | 0.69665108 | 3.39E-28   | 0.84017097 | 1.64E-50   |
| 1.39E-10   | 0.49858356 | 5.11E-13   | -0.7813755 | 2.53E-39   | -0.4130339 | 5.13E-09   |
| 4.01E-07   | -0.3875478 | 5.04E-08   | 0.67709671 | 3.66E-26   | 0.68817744 | 2.70E-27   |
| 2.13E-10   | 0.30249956 | 2.85E-05   | -0.6586774 | 2.19E-24   | -0.6626823 | 9.24E-25   |
| 2.65E-49   | 0.74267076 | 1.07E-33   | -0.7415868 | 1.48E-33   | -0.5045568 | 2.43E-13   |
| 2.90E-41   | -0.5999232 | 1.82E-19   | 0.90940071 | 1.23E-71   | 0.7816893  | 2.25E-39   |
| 1.73E-25   | 0.41081389 | 6.31E-09   | -0.7808979 | 3.01E-39   | -0.5676103 | 3.62E-17   |
| 5.16E-14   | -0.4930019 | 1.01E-12   | 0.80908924 | 4.12E-44   | 0.69774183 | 2.58E-28   |
| 3.13E-18   | 0.39269939 | 3.22E-08   | -0.6526908 | 7.81E-24   | -0.3630779 | 3.79E-07   |
| 0.00043494 | -0.4939817 | 8.98E-13   | 0.49404411 | 8.91E-13   | 0.66435908 | 6.40E-25   |
| 3.01E-34   | 0.43340962 | 7.17E-10   | -0.7451504 | 5.00E-34   | -0.5355222 | 4.03E-15   |
| 3.52E-33   | -0.5260792 | 1.47E-14   | 0.94070631 | 7.50E-88   | 0.6944796  | 5.81E-28   |
| 7.08E-21   | -0.5337148 | 5.18E-15   | 0.87896378 | 9.46E-61   | 0.69891669 | 1.92E-28   |
| 3.07E-20   | -0.5220051 | 2.54E-14   | 0.82992453 | 2.93E-48   | 0.50472812 | 2.38E-13   |
| 9.92E-08   | -0.4460058 | 1.99E-10   | 0.68974434 | 1.85E-27   | 0.65046635 | 1.24E-23   |
| 2.62E-08   | -0.3485248 | 1.16E-06   | 0.67218195 | 1.12E-25   | 0.41248974 | 5.40E-09   |
| 1.98E-12   | -0.4265494 | 1.41E-09   | 0.79664935 | 7.17E-42   | 0.43848167 | 4.30E-10   |
| 5.58E-36   | -0.5084823 | 1.48E-13   | 0.93558255 | 1.16E-84   | 0.62435071 | 2.19E-21   |
| 2.87E-08   | 0.50261634 | 3.10E-13   | -0.6074872 | 4.82E-20   | -0.0062467 | 0.93274697 |
| 1.32E-38   | -0.3919018 | 3.46E-08   | 0.73445387 | 1.24E-32   | 0.4147632  | 4.37E-09   |
| 0.02449979 | 0.38364757 | 7.03E-08   | -0.549011  | 5.91E-16   | -0.3475593 | 1.25E-06   |
| 2.35E-31   | 0.57535668 | 1.07E-17   | -0.5730881 | 1.53E-17   | -0.471126  | 1.31E-11   |
| 1.74E-24   | -0.568366  | 3.22E-17   | 0.79725718 | 5.62E-42   | 0.66042737 | 1.51E-24   |
| 1.12E-42   | 0.73556711 | 8.96E-33   | -0.8665495 | 3.97E-57   | -0.5578345 | 1.60E-16   |
| 1.06E-32   | 0.29993611 | 3.36E-05   | -0.7708509 | 1.10E-37   | -0.5061324 | 1.99E-13   |
| 6.02E-30   | 0.39355054 | 2.99E-08   | -0.6828802 | 9.53E-27   | -0.6260846 | 1.58E-21   |
| 0.01834905 | 0.02134664 | 0.77303237 | -0.2621702 | 0.00031216 | -0.5318937 | 6.66E-15   |
| 1.52E-23   | -0.4004303 | 1.63E-08   | 0.88096564 | 2.26E-61   | 0.68247412 | 1.05E-26   |
| 0.09176839 | 0.36935765 | 2.29E-07   | -0.2704762 | 0.00019641 | -0.356365  | 6.40E-07   |
| 3.49E-09   | 0.36459819 | 3.36E-07   | -0.4996728 | 4.47E-13   | -0.6647682 | 5.85E-25   |
| 0.00011039 | -0.1825082 | 0.0129016  | 0.36936182 | 2.29E-07   | 0.33913704 | 2.33E-06   |
| 1.17E-08   | -0.3889375 | 4.47E-08   | 0.60642415 | 5.82E-20   | 0.46259319 | 3.37E-11   |
| 4.53E-58   | 0.50789833 | 1.59E-13   | -0.9160523 | 1.57E-74   | -0.7047536 | 4.35E-29   |
| 0.01594086 | 0.15512078 | 0.03500079 | -0.3607923 | 4.53E-07   | -0.3106566 | 1.68E-05   |
| 7.83E-39   | -0.4934761 | 9.55E-13   | 0.78160883 | 2.32E-39   | 0.34348785 | 1.70E-06   |
| 1.22E-33   | -0.4415497 | 3.15E-10   | 0.73433997 | 1.28E-32   | 0.29373512 | 4.95E-05   |
| 1.47E-49   | -0.4304656 | 9.61E-10   | 0.84165102 | 7.50E-51   | 0.40955413 | 7.09E-09   |
| 1.51E-37   | 0.37557407 | 1.38E-07   | -0.6231843 | 2.73E-21   | -0.306297  | 2.23E-05   |
| 3.87E-06   | -0.3408506 | 2.06E-06   | 0.59353101 | 5.43E-19   | 0.2812874  | 0.00010506 |

|            |            |            |            |          |            |            |
|------------|------------|------------|------------|----------|------------|------------|
| 1.62E-27   | 0.19879234 | 0.00667436 | -0.538669  | 2.60E-15 | -0.2264183 | 0.00194112 |
| 1.96E-34   | -0.3389244 | 2.37E-06   | 0.8063547  | 1.32E-43 | 0.30145521 | 3.05E-05   |
| 9.68E-18   | -0.4209452 | 2.43E-09   | 0.76746192 | 3.55E-37 | 0.32499714 | 6.37E-06   |
| 3.91E-14   | -0.5948022 | 4.37E-19   | 0.59954396 | 1.94E-19 | 0.33193239 | 3.92E-06   |
| 4.53E-25   | 0.42623905 | 1.46E-09   | -0.7601246 | 4.20E-36 | -0.4661612 | 2.28E-11   |
| 2.41E-49   | -0.5331284 | 5.62E-15   | 0.83586183 | 1.51E-49 | 0.38378232 | 6.95E-08   |
| 2.32E-24   | 0.43635403 | 5.34E-10   | -0.7713089 | 9.37E-38 | -0.5014309 | 3.59E-13   |
| 4.49E-29   | -0.5753614 | 1.07E-17   | 0.78606845 | 4.39E-40 | 0.8732283  | 4.98E-59   |
| 2.15E-17   | -0.487972  | 1.85E-12   | 0.81012865 | 2.63E-44 | 0.76336899 | 1.42E-36   |
| 0.00065393 | 0.43470823 | 6.30E-10   | -0.6012583 | 1.44E-19 | -0.3613388 | 4.34E-07   |
| 1.57E-42   | 0.21688008 | 0.00302417 | -0.69009   | 1.70E-27 | -0.5864206 | 1.78E-18   |
| 9.51E-10   | -0.5609171 | 1.01E-16   | 0.76563972 | 6.61E-37 | 0.5572991  | 1.74E-16   |
| 5.04E-10   | -0.4166929 | 3.64E-09   | 0.69630596 | 3.69E-28 | 0.60851417 | 4.01E-20   |
| 2.77E-20   | 0.11085908 | 0.13302974 | -0.3684982 | 2.46E-07 | -0.0200982 | 0.7859755  |
| 3.97E-27   | 0.41602001 | 3.88E-09   | -0.6070443 | 5.21E-20 | -0.5032053 | 2.88E-13   |
| 2.62E-27   | -0.4688847 | 1.68E-11   | 0.8601618  | 2.11E-55 | 0.52236284 | 2.42E-14   |
| 3.97E-30   | 0.37289166 | 1.72E-07   | -0.6824995 | 1.04E-26 | -0.7956462 | 1.07E-41   |
| 3.05E-11   | -0.1952641 | 0.00773172 | 0.50025142 | 4.16E-13 | 0.65850797 | 2.28E-24   |
| 4.20E-24   | 0.55039132 | 4.83E-16   | -0.7465491 | 3.24E-34 | -0.3390818 | 2.34E-06   |
| 5.12E-31   | -0.4454255 | 2.11E-10   | 0.7409782  | 1.78E-33 | 0.63099967 | 6.15E-22   |
| 3.25E-11   | -0.2567895 | 0.00041809 | 0.45376711 | 8.77E-11 | 0.24329859 | 0.00084665 |
| 6.64E-22   | 0.36310741 | 3.78E-07   | -0.6740878 | 7.30E-26 | -0.6981328 | 2.34E-28   |
| 9.50E-40   | -0.6620631 | 1.06E-24   | 0.9481121  | 5.26E-93 | 0.70396893 | 5.32E-29   |
| 3.63E-25   | -0.4653379 | 2.49E-11   | 0.87685148 | 4.16E-60 | 0.71015712 | 1.06E-29   |
| 0.03840085 | 0.45137209 | 1.13E-10   | -0.395776  | 2.46E-08 | -0.5598286 | 1.19E-16   |
| 4.84E-27   | 0.37204679 | 1.84E-07   | -0.6825369 | 1.03E-26 | -0.7501903 | 1.04E-34   |
| 8.65E-32   | -0.4894943 | 1.54E-12   | 0.84192579 | 6.49E-51 | 0.40292099 | 1.30E-08   |
| 0.00016075 | 0.46321168 | 3.15E-11   | -0.6746093 | 6.48E-26 | -0.4184873 | 3.07E-09   |
| 0.00016211 | -0.3016932 | 3.00E-05   | 0.56746562 | 3.70E-17 | 0.68228144 | 1.10E-26   |
| 1.76E-10   | -0.4034427 | 1.24E-08   | 0.75824775 | 7.80E-36 | 0.46997101 | 1.49E-11   |
| 1.46E-10   | -0.4995334 | 4.55E-13   | 0.6415895  | 7.62E-23 | 0.48251685 | 3.52E-12   |
| 2.33E-21   | 0.31898062 | 9.63E-06   | -0.7239911 | 2.49E-31 | -0.1177923 | 0.11029829 |
| 5.00E-27   | 0.38729189 | 5.15E-08   | -0.7636325 | 1.30E-36 | -0.5836065 | 2.83E-18   |
| 4.00E-19   | 0.28124387 | 0.00010533 | -0.579871  | 5.20E-18 | -0.4624108 | 3.44E-11   |
| 1.91E-16   | 0.26391667 | 0.00028354 | -0.5418382 | 1.66E-15 | -0.715609  | 2.49E-30   |
| 1.02E-33   | -0.3152297 | 1.24E-05   | 0.82546449 | 2.51E-47 | 0.65741171 | 2.88E-24   |
| 9.81E-15   | -0.5016614 | 3.49E-13   | 0.81607981 | 1.91E-45 | 0.6079944  | 4.40E-20   |
| 3.60E-14   | 0.34172135 | 1.93E-06   | -0.6866773 | 3.87E-27 | -0.4072724 | 8.75E-09   |
| 5.18E-30   | -0.509836  | 1.24E-13   | 0.9274602  | 4.18E-80 | 0.71580841 | 2.36E-30   |
| 2.23E-09   | -0.534338  | 4.75E-15   | 0.64898501 | 1.69E-23 | 0.31956854 | 9.25E-06   |
| 5.19E-40   | -0.5526229 | 3.48E-16   | 0.84490858 | 1.31E-51 | 0.34982845 | 1.06E-06   |
| 3.03E-13   | -0.3946075 | 2.73E-08   | 0.77892205 | 6.20E-39 | 0.74963274 | 1.24E-34   |
| 3.67E-14   | -0.5214038 | 2.75E-14   | 0.79535122 | 1.20E-41 | 0.45529061 | 7.45E-11   |
| 0.00040014 | -0.4369395 | 5.03E-10   | 0.57217556 | 1.77E-17 | 0.36898306 | 2.36E-07   |
| 4.41E-05   | -0.4425197 | 2.85E-10   | 0.5999243  | 1.82E-19 | 0.70098004 | 1.14E-28   |
| 4.54E-33   | -0.5688612 | 2.98E-17   | 0.89603593 | 1.93E-66 | 0.5763134  | 9.20E-18   |

|            |            |            |            |          |            |            |
|------------|------------|------------|------------|----------|------------|------------|
| 3.83E-21   | -0.3709363 | 2.02E-07   | 0.5883489  | 1.29E-18 | 0.27450542 | 0.00015603 |
| 1.58E-06   | -0.3870198 | 5.27E-08   | 0.63765516 | 1.67E-22 | 0.52482989 | 1.74E-14   |
| 1.55E-08   | 0.14284872 | 0.05241091 | -0.2953375 | 4.48E-05 | 0.28075632 | 0.00010841 |
| 5.45E-48   | -0.5618219 | 8.79E-17   | 0.89282775 | 2.67E-65 | 0.79946838 | 2.30E-42   |
| 0.00097565 | -0.3639033 | 3.55E-07   | 0.48427005 | 2.87E-12 | 0.74216398 | 1.25E-33   |
| 5.51E-13   | 0.36766024 | 2.63E-07   | -0.6213168 | 3.88E-21 | -0.5786137 | 6.36E-18   |
| 2.76E-30   | -0.4926323 | 1.06E-12   | 0.83868313 | 3.55E-50 | 0.86990811 | 4.52E-58   |
| 6.52E-48   | -0.4993367 | 4.66E-13   | 0.88235683 | 8.24E-62 | 0.5757779  | 1.00E-17   |
| 5.21E-40   | -0.5408003 | 1.92E-15   | 0.90183318 | 1.33E-68 | 0.7430626  | 9.47E-34   |
| 4.76E-63   | 0.48353415 | 3.13E-12   | -0.8954508 | 3.13E-66 | -0.6218282 | 3.52E-21   |
| 1.19E-16   | -0.5276986 | 1.18E-14   | 0.76279338 | 1.73E-36 | 0.38852261 | 4.63E-08   |
| 6.94E-19   | -0.472328  | 1.14E-11   | 0.84047015 | 1.40E-50 | 0.56628823 | 4.44E-17   |
| 9.29E-41   | -0.4981852 | 5.37E-13   | 0.94320988 | 1.62E-89 | 0.7699912  | 1.48E-37   |
| 9.10E-34   | -0.4312583 | 8.88E-10   | 0.72852194 | 6.91E-32 | 0.29625043 | 4.23E-05   |
| 9.54E-08   | 0.14715548 | 0.0456235  | -0.3704314 | 2.10E-07 | -0.3552088 | 7.00E-07   |
| 7.34E-08   | -0.375467  | 1.39E-07   | 0.65118835 | 1.07E-23 | 0.45379948 | 8.74E-11   |
| 5.45E-14   | -0.5914198 | 7.75E-19   | 0.77252639 | 6.11E-38 | 0.74994895 | 1.12E-34   |
| 0.00239021 | -0.3130568 | 1.43E-05   | 0.44815275 | 1.59E-10 | 0.70821672 | 1.77E-29   |
| 2.01E-15   | -0.4794689 | 5.03E-12   | 0.86352487 | 2.67E-56 | 0.64968311 | 1.46E-23   |
| 7.23E-26   | 0.26935707 | 0.00020925 | -0.4802375 | 4.60E-12 | -0.1400364 | 0.05727979 |
| 4.83E-06   | -0.3577064 | 5.77E-07   | 0.56188324 | 8.71E-17 | 0.48936447 | 1.57E-12   |
| 1.78E-35   | 0.46521089 | 2.53E-11   | -0.7618634 | 2.36E-36 | -0.4627483 | 3.32E-11   |
| 3.67E-12   | -0.3301542 | 4.44E-06   | 0.77466131 | 2.87E-38 | 0.65421541 | 5.67E-24   |
| 1.78E-14   | 0.26767656 | 0.00022999 | -0.5089455 | 1.39E-13 | -0.5029358 | 2.98E-13   |
| 7.67E-43   | -0.4861982 | 2.28E-12   | 0.8649181  | 1.12E-56 | 0.39819479 | 1.99E-08   |
| 2.23E-10   | -0.5263515 | 1.42E-14   | 0.73770997 | 4.75E-33 | 0.67123099 | 1.39E-25   |
| 4.08E-16   | -0.4339664 | 6.78E-10   | 0.77117137 | 9.83E-38 | 0.30059416 | 3.22E-05   |
| 5.16E-11   | -0.4141874 | 4.61E-09   | 0.71569713 | 2.43E-30 | 0.35651728 | 6.33E-07   |
| 3.44E-21   | 0.36444521 | 3.40E-07   | -0.7338358 | 1.49E-32 | -0.3771347 | 1.21E-07   |
| 7.88E-09   | -0.2716063 | 0.0001842  | 0.54971958 | 5.33E-16 | -0.0244607 | 0.74102476 |
| 3.16E-39   | -0.3760655 | 1.33E-07   | 0.82208421 | 1.23E-46 | 0.48742047 | 1.98E-12   |
| 1.86E-33   | -0.4764876 | 7.09E-12   | 0.86461321 | 1.35E-56 | 0.34631067 | 1.37E-06   |
| 1.67E-20   | -0.438641  | 4.23E-10   | 0.82196437 | 1.30E-46 | 0.30644399 | 2.21E-05   |
| 1.09E-21   | -0.39568   | 2.48E-08   | 0.82746193 | 9.67E-48 | 0.50079648 | 3.89E-13   |
| 1.30E-32   | -0.3259817 | 5.95E-06   | 0.63559187 | 2.51E-22 | 0.34169997 | 1.93E-06   |
| 7.95E-26   | 0.40618229 | 9.67E-09   | -0.7165651 | 1.92E-30 | -0.5651091 | 5.32E-17   |
| 5.23E-13   | -0.2979719 | 3.80E-05   | 0.70755732 | 2.10E-29 | 0.37118007 | 1.98E-07   |
| 3.30E-43   | -0.5909626 | 8.37E-19   | 0.92403203 | 2.44E-78 | 0.53400152 | 4.98E-15   |
| 3.71E-16   | 0.39271195 | 3.22E-08   | -0.5325533 | 6.08E-15 | -0.2096783 | 0.00417647 |
| 5.87E-27   | -0.6421325 | 6.83E-23   | 0.92649521 | 1.34E-79 | 0.66125154 | 1.26E-24   |
| 5.65E-35   | -0.4856769 | 2.43E-12   | 0.82788422 | 7.89E-48 | 0.34834928 | 1.18E-06   |
| 1.49E-48   | 0.55733211 | 1.73E-16   | -0.7955199 | 1.12E-41 | -0.376165  | 1.31E-07   |
| 4.76E-33   | -0.3668448 | 2.81E-07   | 0.57631817 | 9.19E-18 | 0.20249235 | 0.00570589 |
| 4.73E-07   | 0.40641702 | 9.46E-09   | -0.6765098 | 4.19E-26 | -0.2779591 | 0.00012773 |
| 5.95E-21   | 0.41060095 | 6.44E-09   | -0.8253875 | 2.61E-47 | -0.5825943 | 3.34E-18   |
| 5.32E-11   | -0.5139103 | 7.36E-14   | 0.74022418 | 2.24E-33 | 0.5667312  | 4.14E-17   |



|            |            |            |            |            |            |            |
|------------|------------|------------|------------|------------|------------|------------|
| 9.43E-59   | -0.493038  | 1.01E-12   | 0.72350957 | 2.85E-31   | 0.40144314 | 1.49E-08   |
| 0.02032807 | 0.29177009 | 5.59E-05   | -0.5177816 | 4.44E-14   | -0.3940284 | 2.87E-08   |
| 3.20E-25   | -0.4731958 | 1.03E-11   | 0.64348737 | 5.20E-23   | 0.35369412 | 7.86E-07   |
| 4.31E-16   | -0.3055605 | 2.34E-05   | 0.73535429 | 9.54E-33   | 0.34209096 | 1.88E-06   |
| 8.97E-08   | -0.4418632 | 3.05E-10   | 0.56367384 | 6.63E-17   | 0.69140143 | 1.24E-27   |
| 5.03E-09   | 0.63779466 | 1.63E-22   | -0.7809577 | 2.95E-39   | -0.4503203 | 1.26E-10   |
| 1.48E-13   | 0.27301942 | 0.00016992 | -0.6758975 | 4.83E-26   | -0.5916081 | 7.51E-19   |
| 9.11E-30   | -0.5075079 | 1.67E-13   | 0.80098276 | 1.24E-42   | 0.4309763  | 9.14E-10   |
| 1.33E-31   | 0.49898606 | 4.86E-13   | -0.803954  | 3.62E-43   | -0.5367474 | 3.40E-15   |
| 5.58E-21   | 0.39919494 | 1.82E-08   | -0.779794  | 4.51E-39   | -0.4199164 | 2.68E-09   |
| 0.00242561 | -0.223796  | 0.00219673 | 0.26783872 | 0.00022791 | -0.1291139 | 0.07984691 |
| 0.00589785 | -0.3001508 | 3.31E-05   | 0.50000319 | 4.29E-13   | 0.48579848 | 2.40E-12   |
| 0.00078472 | -0.3308445 | 4.23E-06   | 0.38812386 | 4.79E-08   | 0.33652382 | 2.82E-06   |
| 7.14E-17   | -0.4779229 | 6.01E-12   | 0.71613584 | 2.16E-30   | 0.54687169 | 8.06E-16   |
| 0.55578347 | -0.164487  | 0.02526263 | 0.4127288  | 5.28E-09   | 0.3007894  | 3.18E-05   |
| 1.88E-51   | 0.60439719 | 8.32E-20   | -0.8924549 | 3.61E-65   | -0.701518  | 9.96E-29   |
| 1.19E-35   | 0.536605   | 3.47E-15   | -0.8263689 | 1.63E-47   | -0.6032139 | 1.02E-19   |
| 9.07E-40   | -0.6141448 | 1.45E-20   | 0.85697367 | 1.42E-54   | 0.748269   | 1.90E-34   |
| 1.19E-30   | -0.2077255 | 0.00455058 | 0.82822866 | 6.68E-48   | 0.61314881 | 1.74E-20   |
| 4.96E-25   | -0.4290039 | 1.11E-09   | 0.73041866 | 4.01E-32   | 0.57058801 | 2.27E-17   |
| 2.43E-41   | -0.4681874 | 1.82E-11   | 0.86532049 | 8.65E-57   | 0.50909584 | 1.37E-13   |
| 1.31E-09   | -0.3832941 | 7.24E-08   | 0.44741932 | 1.71E-10   | -0.0443465 | 0.54891621 |
| 0.0005316  | 0.22284616 | 0.00229662 | -0.4756384 | 7.82E-12   | -0.3353271 | 3.07E-06   |
| 1.37E-12   | -0.5272576 | 1.25E-14   | 0.83214572 | 9.80E-49   | 0.6997548  | 1.56E-28   |
| 6.17E-16   | -0.4617554 | 3.70E-11   | 0.7172699  | 1.59E-30   | 0.33443526 | 3.28E-06   |
| 4.67E-10   | -0.3656898 | 3.08E-07   | 0.80614455 | 1.44E-43   | 0.41663594 | 3.66E-09   |
| 3.65E-18   | 0.30978878 | 1.78E-05   | -0.6943433 | 6.01E-28   | -0.7196284 | 8.33E-31   |
| 0.01311081 | -0.3787771 | 1.06E-07   | 0.58437682 | 2.50E-18   | 0.60474194 | 7.83E-20   |
| 1.76E-06   | 0.34497092 | 1.52E-06   | -0.6254536 | 1.78E-21   | -0.3902271 | 4.00E-08   |
| 1.56E-23   | -0.5106356 | 1.12E-13   | 0.89373615 | 1.28E-65   | 0.67285547 | 9.65E-26   |
| 1.62E-25   | 0.49653819 | 6.57E-13   | -0.6950722 | 5.02E-28   | -0.6033146 | 1.01E-19   |
| 5.26E-21   | -0.3280642 | 5.15E-06   | 0.65751381 | 2.81E-24   | 0.07656582 | 0.30026246 |
| 1.63E-47   | -0.4373765 | 4.81E-10   | 0.86142822 | 9.73E-56   | 0.37789607 | 1.14E-07   |
| 5.08E-25   | -0.4269487 | 1.36E-09   | 0.87447195 | 2.14E-59   | 0.63629701 | 2.19E-22   |
| 6.66E-37   | 0.20540953 | 0.00503309 | -0.6202732 | 4.71E-21   | -0.3160206 | 1.18E-05   |
| 9.49E-51   | -0.5703435 | 2.36E-17   | 0.95088599 | 3.92E-95   | 0.60660118 | 5.64E-20   |
| 1.77E-32   | -0.4658077 | 2.37E-11   | 0.64885501 | 1.73E-23   | 0.19136654 | 0.0090705  |
| 3.51E-06   | -0.4825397 | 3.52E-12   | 0.6155553  | 1.12E-20   | 0.66891735 | 2.34E-25   |
| 7.73E-33   | 0.45536968 | 7.39E-11   | -0.6673047 | 3.35E-25   | -0.2406594 | 0.00096764 |
| 4.89E-05   | -0.3874818 | 5.07E-08   | 0.51830334 | 4.14E-14   | 0.77475771 | 2.77E-38   |
| 1.50E-18   | -0.5420776 | 1.60E-15   | 0.84175497 | 7.10E-51   | 0.70264859 | 7.47E-29   |
| 1.57E-16   | 0.26384262 | 0.0002847  | -0.6492023 | 1.61E-23   | -0.0004902 | 0.99471602 |
| 7.10E-18   | -0.5945509 | 4.56E-19   | 0.80272574 | 6.04E-43   | 0.62493854 | 1.96E-21   |
| 1.42E-34   | -0.3751551 | 1.43E-07   | 0.66846634 | 2.59E-25   | 0.71475871 | 3.13E-30   |
| 1.16E-24   | -0.4993994 | 4.62E-13   | 0.70880577 | 1.52E-29   | 0.83046661 | 2.24E-48   |
| 1.85E-32   | -0.4931113 | 9.98E-13   | 0.92982686 | 2.24E-81   | 0.4936811  | 9.31E-13   |

|            |            |            |            |          |            |            |
|------------|------------|------------|------------|----------|------------|------------|
| 6.17E-08   | 0.47891541 | 5.36E-12   | -0.5607531 | 1.03E-16 | -0.3293286 | 4.71E-06   |
| 1.85E-31   | -0.3442354 | 1.60E-06   | 0.71480196 | 3.09E-30 | 0.24269611 | 0.00087297 |
| 7.65E-43   | -0.4979673 | 5.51E-13   | 0.8101006  | 2.66E-44 | 0.3192836  | 9.43E-06   |
| 5.66E-38   | -0.5051952 | 2.24E-13   | 0.59136123 | 7.82E-19 | 0.34943362 | 1.09E-06   |
| 1.18E-28   | 0.38544423 | 6.03E-08   | -0.7949132 | 1.43E-41 | -0.4193041 | 2.84E-09   |
| 2.79E-21   | 0.37781903 | 1.15E-07   | -0.6896309 | 1.90E-27 | -0.7267017 | 1.16E-31   |
| 7.52E-05   | -0.2440037 | 0.00081676 | 0.53804994 | 2.83E-15 | 0.09051276 | 0.22047008 |
| 4.70E-32   | -0.5320665 | 6.50E-15   | 0.83383946 | 4.21E-49 | 0.46810135 | 1.83E-11   |
| 4.26E-35   | -0.5860338 | 1.90E-18   | 0.88173019 | 1.30E-61 | 0.43707539 | 4.96E-10   |
| 2.45E-46   | -0.5354664 | 4.06E-15   | 0.93733161 | 1.02E-85 | 0.60129039 | 1.43E-19   |
| 5.71E-07   | 0.55021467 | 4.96E-16   | -0.6899441 | 1.76E-27 | -0.3390533 | 2.35E-06   |
| 0.00417526 | -0.4417978 | 3.07E-10   | 0.54963939 | 5.39E-16 | 0.22821496 | 0.00178195 |
| 7.13E-15   | -0.2895228 | 6.41E-05   | 0.69744073 | 2.78E-28 | 0.36441679 | 3.41E-07   |
| 0.03720149 | 0.66367466 | 7.44E-25   | -0.4237148 | 1.86E-09 | 0.14053311 | 0.05639368 |
| 6.17E-10   | -0.3405891 | 2.10E-06   | 0.36459883 | 3.36E-07 | 0.26665538 | 0.00024352 |
| 5.05E-13   | -0.598037  | 2.51E-19   | 0.76909651 | 2.02E-37 | 0.57585733 | 9.89E-18   |
| 3.59E-30   | -0.5442318 | 1.18E-15   | 0.92553953 | 4.18E-79 | 0.53242841 | 6.19E-15   |
| 8.65E-33   | 0.53985514 | 2.20E-15   | -0.8585692 | 5.50E-55 | -0.7261015 | 1.37E-31   |
| 8.97E-44   | -0.5630701 | 7.27E-17   | 0.94677295 | 5.09E-92 | 0.73940772 | 2.86E-33   |
| 1.28E-94   | -0.491255  | 1.25E-12   | 0.91645232 | 1.03E-74 | 0.64533232 | 3.57E-23   |
| 8.88E-38   | -0.5076638 | 1.64E-13   | 0.93934629 | 5.61E-87 | 0.76844715 | 2.53E-37   |
| 3.67E-34   | -0.5386145 | 2.62E-15   | 0.94015677 | 1.70E-87 | 0.76801718 | 2.93E-37   |
| 1.71E-18   | 0.2328459  | 0.00142501 | -0.5361582 | 3.69E-15 | -0.7817562 | 2.19E-39   |
| 6.13E-35   | -0.5565417 | 1.95E-16   | 0.88430117 | 1.97E-62 | 0.59585202 | 3.66E-19   |
| 1.92E-34   | -0.4667731 | 2.13E-11   | 0.74816308 | 1.96E-34 | 0.44399272 | 2.45E-10   |
| 2.33E-15   | -0.480479  | 4.47E-12   | 0.7871121  | 2.95E-40 | 0.59475581 | 4.41E-19   |
| 9.03E-32   | -0.3076644 | 2.04E-05   | 0.76655817 | 4.84E-37 | 0.39677787 | 2.25E-08   |
| 7.64E-31   | 0.36041478 | 4.67E-07   | -0.7359486 | 8.01E-33 | -0.682033  | 1.16E-26   |
| 8.90E-24   | 0.38263154 | 7.66E-08   | -0.7438171 | 7.52E-34 | -0.6523255 | 8.43E-24   |
| 0.00322734 | 0.21131632 | 0.00388427 | -0.5417978 | 1.67E-15 | -0.2298289 | 0.00164922 |
| 3.39E-20   | 0.29316799 | 5.13E-05   | -0.6652667 | 5.25E-25 | -0.7559338 | 1.66E-35   |
| 3.46E-05   | -0.3088993 | 1.88E-05   | 0.66494576 | 5.63E-25 | 0.54009535 | 2.12E-15   |
| 3.33E-13   | -0.4589981 | 5.00E-11   | 0.78402131 | 9.46E-40 | 0.33990509 | 2.21E-06   |
| 1.45E-12   | 0.40764643 | 8.45E-09   | -0.7489396 | 1.54E-34 | -0.4585979 | 5.22E-11   |
| 4.91E-32   | -0.5440865 | 1.20E-15   | 0.87518372 | 1.32E-59 | 0.42967267 | 1.04E-09   |
| 3.42E-14   | -0.4174061 | 3.40E-09   | 0.73633463 | 7.14E-33 | 0.24067124 | 0.00096707 |
| 1.56E-10   | 0.71932403 | 9.06E-31   | -0.6886685 | 2.40E-27 | -0.382005  | 8.07E-08   |
| 1.52E-11   | 0.42617953 | 1.46E-09   | -0.7683671 | 2.60E-37 | -0.3773787 | 1.19E-07   |
| 2.58E-06   | 0.59263298 | 6.32E-19   | -0.6113464 | 2.41E-20 | -0.5514769 | 4.12E-16   |
| 6.31E-08   | -0.3815149 | 8.41E-08   | 0.7057133  | 3.40E-29 | 0.57623751 | 9.31E-18   |
| 3.43E-42   | 0.34599397 | 1.41E-06   | -0.6353417 | 2.64E-22 | -0.4020154 | 1.41E-08   |
| 3.26E-17   | -0.3363786 | 2.85E-06   | 0.64303181 | 5.70E-23 | 0.03526056 | 0.63372312 |
| 4.56E-40   | 0.31487889 | 1.27E-05   | -0.7960044 | 9.27E-42 | -0.5058924 | 2.05E-13   |
| 3.75E-26   | 0.62731308 | 1.25E-21   | -0.7710381 | 1.03E-37 | -0.7039407 | 5.36E-29   |
| 1.73E-15   | 0.54542268 | 9.93E-16   | -0.6994863 | 1.67E-28 | -0.7772023 | 1.16E-38   |
| 3.36E-30   | -0.498388  | 5.24E-13   | 0.86866411 | 1.02E-57 | 0.83950018 | 2.32E-50   |

|            |            |            |            |           |            |            |
|------------|------------|------------|------------|-----------|------------|------------|
| 2.87E-22   | 0.55269868 | 3.44E-16   | -0.6758431 | 4.89E-26  | -0.4977995 | 5.63E-13   |
| 6.43E-23   | 0.24673812 | 0.00070983 | -0.6966961 | 3.35E-28  | -0.2319438 | 0.00148894 |
| 8.45E-23   | 0.418539   | 3.06E-09   | -0.6634942 | 7.74E-25  | -0.4493497 | 1.40E-10   |
| 1.06E-11   | -0.4046848 | 1.11E-08   | 0.60129798 | 1.43E-19  | 0.83540743 | 1.91E-49   |
| 5.50E-18   | 0.37687392 | 1.24E-07   | -0.5508586 | 4.51E-16  | -0.4476478 | 1.67E-10   |
| 0.00019523 | -0.3102266 | 1.73E-05   | 0.58409571 | 2.61E-18  | 0.60243955 | 1.17E-19   |
| 5.89E-05   | 0.23225244 | 0.00146678 | -0.4708676 | 1.34E-11  | -0.5315367 | 6.99E-15   |
| 2.04E-20   | 0.43393104 | 6.81E-10   | -0.6431353 | 5.58E-23  | -0.5050517 | 2.28E-13   |
| 2.29E-08   | -0.4440087 | 2.44E-10   | 0.66951456 | 2.05E-25  | 0.68410695 | 7.13E-27   |
| 2.73E-28   | -0.6271545 | 1.29E-21   | 0.92474228 | 1.07E-78  | 0.54871295 | 6.17E-16   |
| 1.19E-29   | -0.4892405 | 1.59E-12   | 0.861774   | 7.87E-56  | 0.63972514 | 1.11E-22   |
| 1.96E-06   | -0.2084866 | 0.00440132 | 0.63917151 | 1.24E-22  | 0.324161   | 6.75E-06   |
| 3.00E-17   | -0.6078308 | 4.53E-20   | 0.85541788 | 3.55E-54  | 0.5867184  | 1.70E-18   |
| 5.46E-50   | -0.5026226 | 3.10E-13   | 0.84873376 | 1.61E-52  | 0.40162729 | 1.46E-08   |
| 5.10E-08   | 0.5417929  | 1.67E-15   | -0.5787932 | 6.18E-18  | -0.4867228 | 2.15E-12   |
| 2.40E-39   | 0.54389689 | 1.24E-15   | -0.7992921 | 2.47E-42  | -0.4330297 | 7.45E-10   |
| 0.0004552  | -0.3826022 | 7.68E-08   | 0.64818008 | 1.99E-23  | 0.4961706  | 6.88E-13   |
| 4.18E-52   | -0.5306749 | 7.87E-15   | 0.93392971 | 1.09E-83  | 0.5484965  | 6.37E-16   |
| 3.68E-12   | 0.34626984 | 1.38E-06   | -0.4585624 | 5.24E-11  | 0.14702343 | 0.04582011 |
| 2.88E-54   | 0.39527137 | 2.57E-08   | -0.6728581 | 9.64E-26  | -0.3472596 | 1.28E-06   |
| 4.98E-15   | 0.44068676 | 3.44E-10   | -0.6178682 | 7.35E-21  | -0.691128  | 1.32E-27   |
| 6.49E-34   | -0.5504226 | 4.81E-16   | 0.90250665 | 7.31E-69  | 0.58004421 | 5.05E-18   |
| 7.50E-62   | -0.495517  | 7.45E-13   | 0.92101524 | 7.48E-77  | 0.71627096 | 2.08E-30   |
| 2.24E-05   | -0.4566649 | 6.43E-11   | 0.61630899 | 9.79E-21  | 0.56168578 | 8.97E-17   |
| 0.00143752 | -0.4148628 | 4.33E-09   | 0.58482193 | 2.32E-18  | 0.55726929 | 1.75E-16   |
| 1.53E-08   | -0.3988185 | 1.88E-08   | 0.74043691 | 2.10E-33  | 0.628705   | 9.57E-22   |
| 1.44E-46   | -0.5649866 | 5.42E-17   | 0.94260667 | 4.15E-89  | 0.65170793 | 9.59E-24   |
| 4.16E-61   | -0.5615319 | 9.18E-17   | 0.92222001 | 1.94E-77  | 0.80867597 | 4.92E-44   |
| 8.35E-16   | -0.4277791 | 1.25E-09   | 0.8080699  | 6.37E-44  | 0.75344535 | 3.69E-35   |
| 2.87E-35   | -0.5795057 | 5.51E-18   | 0.94727342 | 2.20E-92  | 0.69673574 | 3.32E-28   |
| 7.09E-16   | -0.5016473 | 3.50E-13   | 0.79975302 | 2.05E-42  | 0.71058488 | 9.51E-30   |
| 1.45E-25   | -0.4839725 | 2.97E-12   | 0.87849748 | 1.31E-60  | 0.81575082 | 2.22E-45   |
| 0.73983219 | -0.1837783 | 0.01227709 | 0.27190393 | 0.0001811 | 0.27319243 | 0.00016825 |
| 5.60E-19   | 0.51183701 | 9.62E-14   | -0.7729389 | 5.28E-38  | -0.8101443 | 2.61E-44   |
| 4.74E-71   | -0.5470443 | 7.86E-16   | 0.91437738 | 8.83E-74  | 0.54314232 | 1.38E-15   |
| 1.24E-71   | -0.4678766 | 1.88E-11   | 0.74155282 | 1.50E-33  | 0.44853599 | 1.53E-10   |
| 3.63E-36   | -0.6180986 | 7.04E-21   | 0.88040292 | 3.39E-61  | 0.52495504 | 1.71E-14   |
| 1.40E-43   | -0.4683866 | 1.78E-11   | 0.66511012 | 5.43E-25  | 0.27588008 | 0.00014413 |
| 1.96E-28   | -0.5336621 | 5.22E-15   | 0.79024452 | 8.90E-41  | 0.28843617 | 6.85E-05   |
| 2.60E-57   | -0.4580037 | 5.56E-11   | 0.72197118 | 4.37E-31  | 0.32492047 | 6.41E-06   |
| 2.37E-54   | -0.5478711 | 6.97E-16   | 0.91743477 | 3.66E-75  | 0.63689666 | 1.94E-22   |
| 6.36E-74   | -0.5353415 | 4.13E-15   | 0.83241201 | 8.58E-49  | 0.47871114 | 5.49E-12   |
| 4.52E-18   | -0.4659822 | 2.32E-11   | 0.84154132 | 7.95E-51  | 0.41057036 | 6.46E-09   |
| 6.07E-46   | -0.5637408 | 6.56E-17   | 0.93654659 | 3.06E-85  | 0.78043711 | 3.57E-39   |
| 7.61E-19   | -0.552824  | 3.38E-16   | 0.80520274 | 2.15E-43  | 0.77763277 | 9.89E-39   |
| 5.69E-05   | -0.4016077 | 1.46E-08   | 0.65069189 | 1.18E-23  | 0.48590909 | 2.36E-12   |

|            |            |            |            |          |            |            |
|------------|------------|------------|------------|----------|------------|------------|
| 1.69E-63   | -0.5697982 | 2.57E-17   | 0.94192481 | 1.19E-88 | 0.67627609 | 4.42E-26   |
| 5.97E-28   | -0.3713805 | 1.95E-07   | 0.87598606 | 7.59E-60 | 0.77885839 | 6.35E-39   |
| 1.74E-48   | -0.4783019 | 5.75E-12   | 0.87313079 | 5.31E-59 | 0.80258092 | 6.41E-43   |
| 1.11E-27   | 0.4003201  | 1.64E-08   | -0.7012388 | 1.07E-28 | -0.7115027 | 7.46E-30   |
| 1.91E-38   | -0.3931078 | 3.11E-08   | 0.67681828 | 3.91E-26 | 0.24713711 | 0.00069535 |
| 0.00152495 | -0.2593446 | 0.00036421 | 0.50946197 | 1.30E-13 | 0.59101812 | 8.29E-19   |
| 2.74E-13   | 0.39839964 | 1.95E-08   | -0.5613238 | 9.48E-17 | -0.0203818 | 0.78303021 |
| 2.65E-40   | 0.52167965 | 2.65E-14   | -0.7176373 | 1.44E-30 | -0.3604135 | 4.67E-07   |
| 1.31E-15   | 0.29769822 | 3.87E-05   | -0.4137397 | 4.81E-09 | -0.0500722 | 0.49849222 |
| 5.94E-27   | -0.5240414 | 1.93E-14   | 0.67748593 | 3.35E-26 | 0.69472515 | 5.47E-28   |
| 2.68E-17   | -0.5447509 | 1.09E-15   | 0.74192532 | 1.34E-33 | 0.18520194 | 0.01160882 |
| 1.08E-27   | 0.53971095 | 2.24E-15   | -0.6360641 | 2.29E-22 | -0.1993895 | 0.00650875 |
| 7.00E-48   | -0.5256691 | 1.55E-14   | 0.78669512 | 3.46E-40 | 0.5491109  | 5.82E-16   |
| 1.43E-08   | 0.17436165 | 0.01761024 | -0.5738192 | 1.37E-17 | -0.5429239 | 1.42E-15   |
| 1.16E-59   | 0.52775826 | 1.17E-14   | -0.8152427 | 2.78E-45 | -0.3939399 | 2.89E-08   |
| 0.00025126 | -0.4051416 | 1.06E-08   | 0.5531968  | 3.20E-16 | 0.61880548 | 6.18E-21   |
| 1.22E-17   | -0.5623669 | 8.09E-17   | 0.74260383 | 1.09E-33 | 0.37289893 | 1.72E-07   |
| 1.11E-44   | -0.4075013 | 8.57E-09   | 0.73508858 | 1.03E-32 | 0.30788272 | 2.01E-05   |
| 6.55E-18   | -0.3926444 | 3.24E-08   | 0.79867706 | 3.17E-42 | 0.71460394 | 3.26E-30   |
| 7.01E-32   | 0.4062367  | 9.62E-09   | -0.6345963 | 3.05E-22 | -0.304291  | 2.54E-05   |
| 0.00075662 | -0.2156061 | 0.00320428 | 0.48774708 | 1.90E-12 | 0.74758766 | 2.35E-34   |
| 1.07E-27   | -0.418084  | 3.19E-09   | 0.83428872 | 3.36E-49 | 0.58288804 | 3.18E-18   |
| 8.75E-15   | 0.27903313 | 0.00011996 | -0.6139846 | 1.50E-20 | -0.6971284 | 3.01E-28   |
| 1.44E-24   | 0.41313551 | 5.09E-09   | -0.8186801 | 5.91E-46 | -0.3666946 | 2.84E-07   |
| 9.63E-34   | -0.3825832 | 7.69E-08   | 0.80044293 | 1.54E-42 | 0.34205598 | 1.88E-06   |
| 9.02E-24   | -0.4737744 | 9.67E-12   | 0.8234821  | 6.41E-47 | 0.36690413 | 2.79E-07   |
| 1.62E-42   | 0.43246986 | 7.88E-10   | -0.6269919 | 1.33E-21 | -0.5138625 | 7.40E-14   |
| 2.54E-11   | 0.52378954 | 2.00E-14   | -0.5763414 | 9.16E-18 | -0.6166902 | 9.13E-21   |
| 1.05E-39   | 0.7155874  | 2.50E-30   | -0.8245974 | 3.79E-47 | -0.5842206 | 2.56E-18   |
| 0.00010922 | -0.4160314 | 3.87E-09   | 0.58611643 | 1.87E-18 | 0.56981396 | 2.57E-17   |
| 7.46E-33   | -0.3816483 | 8.32E-08   | 0.72383717 | 2.60E-31 | 0.495147   | 7.79E-13   |
| 3.26E-35   | -0.4876331 | 1.93E-12   | 0.89322376 | 1.94E-65 | 0.54143759 | 1.75E-15   |
| 2.55E-41   | -0.451763  | 1.09E-10   | 0.72289906 | 3.37E-31 | 0.27429483 | 0.00015793 |
| 1.21E-62   | -0.4784568 | 5.65E-12   | 0.78975614 | 1.07E-40 | 0.35706111 | 6.07E-07   |
| 1.67E-39   | -0.49982   | 4.39E-13   | 0.86403156 | 1.94E-56 | 0.42449583 | 1.72E-09   |
| 3.96E-74   | -0.5319062 | 6.65E-15   | 0.83595084 | 1.45E-49 | 0.48939307 | 1.56E-12   |
| 3.05E-12   | -0.3195778 | 9.25E-06   | 0.77318314 | 4.85E-38 | 0.35061876 | 9.94E-07   |
| 1.02E-49   | -0.5913849 | 7.79E-19   | 0.88660451 | 3.48E-63 | 0.57071819 | 2.23E-17   |
| 5.45E-24   | -0.5360106 | 3.77E-15   | 0.88629309 | 4.41E-63 | 0.44693994 | 1.80E-10   |
| 5.95E-27   | 0.23015383 | 0.00162361 | -0.52731   | 1.25E-14 | -0.4412823 | 3.23E-10   |
| 8.78E-07   | -0.4719433 | 1.19E-11   | 0.69808735 | 2.37E-28 | 0.47100541 | 1.32E-11   |
| 2.55E-20   | -0.4255316 | 1.56E-09   | 0.63553435 | 2.54E-22 | 0.74869274 | 1.66E-34   |
| 3.97E-28   | -0.4962777 | 6.79E-13   | 0.79204446 | 4.42E-41 | 0.48393484 | 2.98E-12   |
| 2.85E-48   | -0.5186256 | 3.97E-14   | 0.90805623 | 4.45E-71 | 0.55164069 | 4.02E-16   |
| 1.70E-43   | 0.36871076 | 2.42E-07   | -0.7412346 | 1.65E-33 | -0.3745227 | 1.50E-07   |
| 3.74E-17   | -0.4551215 | 7.59E-11   | 0.8257418  | 2.20E-47 | 0.71081227 | 8.96E-30   |

|            |            |            |            |          |            |            |
|------------|------------|------------|------------|----------|------------|------------|
| 4.73E-27   | 0.66307196 | 8.48E-25   | -0.6147292 | 1.31E-20 | -0.4624333 | 3.43E-11   |
| 7.97E-15   | 0.65430326 | 5.56E-24   | -0.7354692 | 9.22E-33 | -0.7405511 | 2.03E-33   |
| 9.26E-08   | 0.22014213 | 0.00260399 | -0.4925401 | 1.07E-12 | -0.6617168 | 1.14E-24   |
| 1.41E-07   | 0.19671045 | 0.00728147 | -0.5277153 | 1.18E-14 | -0.5043632 | 2.49E-13   |
| 8.15E-07   | -0.492611  | 1.06E-12   | 0.62802155 | 1.09E-21 | 0.5615735  | 9.13E-17   |
| 1.28E-27   | 0.38462258 | 6.47E-08   | -0.7542887 | 2.82E-35 | -0.4922278 | 1.11E-12   |
| 2.41E-15   | 0.33167927 | 3.99E-06   | -0.5748278 | 1.17E-17 | -0.2047009 | 0.00518963 |
| 5.85E-55   | -0.5904924 | 9.05E-19   | 0.89424759 | 8.44E-66 | 0.76134936 | 2.80E-36   |
| 0.02800353 | 0.23696744 | 0.00116365 | -0.4816643 | 3.89E-12 | -0.4898234 | 1.48E-12   |
| 1.80E-07   | 0.24932303 | 0.00062075 | -0.6425093 | 6.33E-23 | -0.570254  | 2.40E-17   |
| 3.73E-30   | 0.68001822 | 1.86E-26   | -0.7361372 | 7.57E-33 | -0.4327554 | 7.66E-10   |
| 4.88E-47   | -0.5746642 | 1.20E-17   | 0.94123568 | 3.38E-88 | 0.60690311 | 5.34E-20   |
| 1.21E-18   | 0.47419624 | 9.22E-12   | -0.6514999 | 1.00E-23 | -0.6892404 | 2.09E-27   |
| 3.55E-35   | 0.20008714 | 0.00631994 | -0.6493295 | 1.57E-23 | -0.4188486 | 2.97E-09   |
| 4.21E-19   | -0.0573897 | 0.43778844 | 0.53248941 | 6.14E-15 | 0.08588974 | 0.24504939 |
| 1.60E-11   | -0.1381637 | 0.06072437 | 0.65299519 | 7.32E-24 | 0.39370714 | 2.95E-08   |
| 6.23E-15   | -0.4199812 | 2.66E-09   | 0.67140753 | 1.34E-25 | 0.73478087 | 1.13E-32   |
| 1.41E-28   | 0.58029835 | 4.85E-18   | -0.8167016 | 1.45E-45 | -0.4712354 | 1.29E-11   |
| 8.63E-13   | -0.450935  | 1.18E-10   | 0.77445495 | 3.09E-38 | 0.29677627 | 4.10E-05   |
| 6.25E-22   | 0.35982566 | 4.89E-07   | -0.7428105 | 1.02E-33 | -0.3554586 | 6.87E-07   |
| 1.35E-20   | -0.3834697 | 7.13E-08   | 0.806274   | 1.37E-43 | 0.32866836 | 4.93E-06   |
| 1.37E-65   | -0.3651484 | 3.21E-07   | 0.83454414 | 2.95E-49 | 0.61975177 | 5.19E-21   |
| 2.70E-64   | -0.6126559 | 1.91E-20   | 0.85867674 | 5.15E-55 | 0.57752985 | 7.57E-18   |
| 0.00302501 | 0.18740109 | 0.01063939 | -0.4825385 | 3.52E-12 | -0.4892744 | 1.58E-12   |
| 1.11E-10   | 0.43418929 | 6.63E-10   | -0.7072705 | 2.27E-29 | -0.5332956 | 5.49E-15   |
| 1.85E-13   | 0.3522582  | 8.78E-07   | -0.6440185 | 4.67E-23 | -0.5038281 | 2.66E-13   |
| 7.85E-33   | 0.2606867  | 0.00033856 | -0.6685627 | 2.53E-25 | -0.189676  | 0.00971239 |
| 6.59E-13   | 0.42602327 | 1.49E-09   | -0.5342622 | 4.80E-15 | -0.3738158 | 1.59E-07   |
| 0.00026286 | 0.20047773 | 0.00621637 | -0.372675  | 1.75E-07 | -0.243517  | 0.00083728 |
| 5.17E-23   | -0.3820699 | 8.03E-08   | 0.70460982 | 4.52E-29 | 0.8935309  | 1.51E-65   |
| 0.04320704 | -0.3134729 | 1.39E-05   | 0.51845877 | 4.06E-14 | 0.07738939 | 0.29507823 |
| 1.54E-48   | -0.5389984 | 2.48E-15   | 0.78027127 | 3.79E-39 | 0.34658704 | 1.35E-06   |
| 2.21E-09   | -0.4856646 | 2.43E-12   | 0.74567585 | 4.25E-34 | 0.68319172 | 8.85E-27   |
| 1.08E-11   | -0.3888219 | 4.51E-08   | 0.77119511 | 9.75E-38 | 0.40260379 | 1.34E-08   |
| 2.01E-49   | -0.5699633 | 2.51E-17   | 0.85005056 | 7.69E-53 | 0.64049185 | 9.50E-23   |
| 7.48E-20   | -0.4437541 | 2.51E-10   | 0.66261405 | 9.37E-25 | 0.2595712  | 0.00035975 |
| 1.80E-14   | -0.4862137 | 2.28E-12   | 0.76366601 | 1.29E-36 | 0.69427875 | 6.10E-28   |
| 1.92E-07   | 0.36704416 | 2.76E-07   | -0.5798697 | 5.20E-18 | -0.6372189 | 1.82E-22   |
| 1.29E-31   | 0.69855031 | 2.11E-28   | -0.8189581 | 5.20E-46 | -0.6555817 | 4.24E-24   |
| 3.93E-10   | -0.4776675 | 6.19E-12   | 0.75275296 | 4.61E-35 | 0.67464404 | 6.43E-26   |
| 1.56E-13   | 0.12237278 | 0.09703299 | -0.5891489 | 1.13E-18 | -0.2100503 | 0.00410843 |
| 9.18E-05   | -0.4126001 | 5.35E-09   | 0.60664951 | 5.59E-20 | 0.32425464 | 6.71E-06   |
| 6.04E-18   | -0.4095889 | 7.07E-09   | 0.65156313 | 9.88E-24 | 0.56696411 | 4.00E-17   |
| 3.13E-37   | -0.5123848 | 8.96E-14   | 0.92111097 | 6.72E-77 | 0.59595337 | 3.59E-19   |
| 1.66E-16   | 0.53482159 | 4.44E-15   | -0.8018479 | 8.68E-43 | -0.497118  | 6.12E-13   |
| 6.13E-10   | -0.4400999 | 3.65E-10   | 0.65139061 | 1.02E-23 | 0.77858823 | 7.00E-39   |

|            |            |            |            |           |            |            |
|------------|------------|------------|------------|-----------|------------|------------|
| 9.41E-22   | 0.23952988 | 0.00102413 | -0.6178611 | 7.36E-21  | -0.3626612 | 3.91E-07   |
| 5.91E-12   | -0.4938974 | 9.07E-13   | 0.6877325  | 3.00E-27  | 0.24858629 | 0.00064502 |
| 7.32E-14   | -0.427266  | 1.32E-09   | 0.55707441 | 1.80E-16  | 0.25995446 | 0.00035233 |
| 1.79E-25   | 0.2772086  | 0.00013344 | -0.6223223 | 3.21E-21  | -0.2070096 | 0.0046951  |
| 2.65E-23   | 0.53055549 | 8.00E-15   | -0.564967  | 5.44E-17  | -0.24769   | 0.00067574 |
| 2.46E-41   | -0.4286005 | 1.15E-09   | 0.82521796 | 2.83E-47  | 0.3503001  | 1.02E-06   |
| 2.14E-17   | -0.2857334 | 8.06E-05   | 0.70305062 | 6.74E-29  | 0.17582517 | 0.01666794 |
| 1.70E-46   | -0.5240978 | 1.92E-14   | 0.90789451 | 5.18E-71  | 0.48818097 | 1.81E-12   |
| 2.61E-31   | -0.393031  | 3.13E-08   | 0.77097135 | 1.05E-37  | 0.34153918 | 1.96E-06   |
| 6.33E-16   | 0.67826521 | 2.80E-26   | -0.572344  | 1.73E-17  | -0.6887634 | 2.34E-27   |
| 2.91E-06   | 0.47242764 | 1.13E-11   | -0.5064875 | 1.90E-13  | -0.6932967 | 7.77E-28   |
| 1.03E-15   | 0.0771506  | 0.29657525 | -0.4071073 | 8.88E-09  | -0.2942751 | 4.79E-05   |
| 0.00086073 | -0.0844622 | 0.25301058 | 0.51824818 | 4.17E-14  | 0.3013395  | 3.07E-05   |
| 1.40E-11   | 0.2937528  | 4.94E-05   | -0.6043251 | 8.43E-20  | -0.3848443 | 6.35E-08   |
| 1.83E-07   | 0.28981516 | 6.30E-05   | -0.5173283 | 4.71E-14  | -0.5359045 | 3.82E-15   |
| 9.64E-20   | 0.31389093 | 1.36E-05   | -0.5361916 | 3.67E-15  | -0.7674981 | 3.51E-37   |
| 4.72E-35   | -0.5920083 | 7.02E-19   | 0.83980267 | 1.98E-50  | 0.47958038 | 4.96E-12   |
| 2.04E-32   | -0.3715139 | 1.92E-07   | 0.71529507 | 2.71E-30  | 0.18877252 | 0.01007164 |
| 0.4916009  | -0.1183689 | 0.10855417 | 0.34062449 | 2.09E-06  | 0.12786012 | 0.08284281 |
| 0.92138317 | -0.2520902 | 0.00053691 | 0.31909228 | 9.56E-06  | 0.03494235 | 0.63679095 |
| 1.71E-25   | -0.5242956 | 1.87E-14   | 0.9212786  | 5.58E-77  | 0.69546733 | 4.55E-28   |
| 3.38E-33   | -0.4363821 | 5.32E-10   | 0.82399566 | 5.04E-47  | 0.45298248 | 9.53E-11   |
| 7.87E-10   | 0.23446685 | 0.00131641 | -0.5343408 | 4.75E-15  | -0.5513204 | 4.22E-16   |
| 6.81E-10   | -0.0369309 | 0.61772297 | 0.44908278 | 1.44E-10  | 0.05035704 | 0.49604902 |
| 8.57E-52   | 0.36922441 | 2.32E-07   | -0.65765   | 2.73E-24  | -0.3729834 | 1.71E-07   |
| 4.20E-23   | -0.5643503 | 5.97E-17   | 0.60716822 | 5.10E-20  | 0.18919891 | 0.00990065 |
| 1.08E-10   | 0.33951764 | 2.27E-06   | -0.7250146 | 1.87E-31  | -0.4260359 | 1.48E-09   |
| 9.81E-33   | 0.45433301 | 8.26E-11   | -0.8681518 | 1.42E-57  | -0.4479869 | 1.62E-10   |
| 7.02E-22   | 0.38659345 | 5.47E-08   | -0.7394059 | 2.86E-33  | -0.7796921 | 4.68E-39   |
| 6.77E-08   | 0.34826189 | 1.19E-06   | -0.6727978 | 9.78E-26  | -0.3114499 | 1.59E-05   |
| 4.18E-63   | -0.5077332 | 1.63E-13   | 0.80065631 | 1.42E-42  | 0.4467567  | 1.84E-10   |
| 2.34E-07   | 0.35726784 | 5.97E-07   | -0.4290348 | 1.11E-09  | 0.13779744 | 0.06141756 |
| 7.46E-37   | -0.5025749 | 3.11E-13   | 0.90738247 | 8.40E-71  | 0.67833966 | 2.75E-26   |
| 0.08097927 | -0.4308607 | 9.24E-10   | 0.33981978 | 2.22E-06  | -0.1179282 | 0.10988537 |
| 6.86E-46   | -0.571353  | 2.02E-17   | 0.94145222 | 2.44E-88  | 0.547684   | 7.16E-16   |
| 2.09E-21   | -0.3486207 | 1.16E-06   | 0.8314145  | 1.41E-48  | 0.76800268 | 2.95E-37   |
| 7.41E-19   | 0.08838731 | 0.2315436  | -0.5481183 | 6.73E-16  | -0.5206332 | 3.05E-14   |
| 3.06E-12   | 0.58428563 | 2.53E-18   | -0.7471653 | 2.68E-34  | -0.5649852 | 5.42E-17   |
| 0.00024275 | -0.1589937 | 0.03064436 | 0.35811767 | 5.59E-07  | 0.03983328 | 0.59034736 |
| 1.45E-51   | -0.3762229 | 1.31E-07   | 0.71185938 | 6.79E-30  | 0.51012333 | 1.20E-13   |
| 2.43E-14   | 0.35657862 | 6.30E-07   | -0.7891708 | 1.35E-40  | -0.3541726 | 7.58E-07   |
| 1.38E-19   | 0.79988613 | 1.94E-42   | -0.7550367 | 2.21E-35  | -0.4775617 | 6.27E-12   |
| 3.50E-29   | 0.5173574  | 4.69E-14   | -0.8683036 | 1.29E-57  | -0.7387734 | 3.46E-33   |
| 2.18E-06   | -0.3130395 | 1.43E-05   | 0.6668265  | 3.72E-25  | 0.64385201 | 4.83E-23   |
| 6.24E-06   | 0.0467913  | 0.52708415 | 0.50316997 | 2.89E-13  | 0.63492308 | 2.87E-22   |
| 3.38E-44   | -0.580946  | 4.37E-18   | 0.9715126  | 2.28E-116 | 0.65630162 | 3.64E-24   |

|            |            |            |            |          |            |            |
|------------|------------|------------|------------|----------|------------|------------|
| 2.96E-25   | -0.5298531 | 8.81E-15   | 0.8771175  | 3.46E-60 | 0.49721281 | 6.05E-13   |
| 4.30E-10   | 0.2530398  | 0.00051063 | -0.6823275 | 1.08E-26 | -0.4313784 | 8.78E-10   |
| 2.16E-33   | -0.4425745 | 2.83E-10   | 0.77540302 | 2.20E-38 | 0.2504829  | 0.00058423 |
| 6.82E-24   | -0.496008  | 7.01E-13   | 0.84109114 | 1.01E-50 | 0.78820254 | 1.95E-40   |
| 2.24E-06   | -0.4765885 | 7.01E-12   | 0.64687047 | 2.61E-23 | 0.44533715 | 2.13E-10   |
| 6.12E-12   | -0.4315437 | 8.64E-10   | 0.79343365 | 2.57E-41 | 0.64779322 | 2.16E-23   |
| 5.41E-12   | 0.41030769 | 6.62E-09   | -0.6888692 | 2.28E-27 | -0.4698233 | 1.51E-11   |
| 9.35E-20   | 0.43292977 | 7.52E-10   | -0.7619024 | 2.33E-36 | -0.4735046 | 9.97E-12   |
| 9.58E-15   | -0.325001  | 6.37E-06   | 0.78733355 | 2.72E-40 | 0.36639383 | 2.91E-07   |
| 1.73E-23   | 0.44581051 | 2.03E-10   | -0.8237623 | 5.62E-47 | -0.5589905 | 1.35E-16   |
| 0.00036856 | 0.17318301 | 0.01840245 | -0.4800871 | 4.68E-12 | -0.5884898 | 1.26E-18   |
| 1.34E-08   | -0.4603932 | 4.29E-11   | 0.54108964 | 1.84E-15 | 0.0060726  | 0.93461715 |
| 0.0001876  | -0.5234839 | 2.08E-14   | 0.59101947 | 8.29E-19 | 0.45205556 | 1.05E-10   |
| 0.04334226 | 0.21897006 | 0.00274845 | -0.5625885 | 7.82E-17 | -0.3137864 | 1.37E-05   |
| 1.48E-41   | -0.5432506 | 1.36E-15   | 0.90100938 | 2.75E-68 | 0.49735341 | 5.95E-13   |
| 3.30E-18   | 0.35630431 | 6.43E-07   | -0.7466309 | 3.16E-34 | -0.3832093 | 7.29E-08   |
| 2.66E-13   | -0.4880664 | 1.83E-12   | 0.73525274 | 9.83E-33 | 0.67378209 | 7.82E-26   |
| 9.40E-33   | 0.44624021 | 1.94E-10   | -0.7995931 | 2.18E-42 | -0.6108822 | 2.62E-20   |
| 3.37E-40   | -0.5386168 | 2.61E-15   | 0.84946698 | 1.07E-52 | 0.83032518 | 2.41E-48   |
| 3.82E-06   | 0.67087472 | 1.51E-25   | -0.5048299 | 2.35E-13 | -0.5321884 | 6.40E-15   |
| 8.74E-08   | -0.5144544 | 6.85E-14   | 0.70595485 | 3.19E-29 | 0.65376431 | 6.23E-24   |
| 7.71E-19   | 0.28814359 | 6.97E-05   | -0.640144  | 1.02E-22 | -0.6544573 | 5.38E-24   |
| 7.26E-38   | 0.28356889 | 9.18E-05   | -0.6222434 | 3.26E-21 | -0.2481472 | 0.00065991 |
| 8.89E-32   | 0.35812809 | 5.58E-07   | -0.6648678 | 5.73E-25 | -0.3489322 | 1.13E-06   |
| 0.00163834 | 0.18320716 | 0.01255455 | -0.3387821 | 2.39E-06 | -0.3696469 | 2.24E-07   |
| 4.85E-05   | -0.2906953 | 5.97E-05   | 0.52698766 | 1.30E-14 | 0.57171811 | 1.90E-17   |
| 0.00034111 | 0.34153685 | 1.96E-06   | -0.4444639 | 2.33E-10 | -0.5292387 | 9.58E-15   |
| 2.16E-22   | -0.5113729 | 1.02E-13   | 0.84680884 | 4.65E-52 | 0.8186392  | 6.02E-46   |
| 3.47E-08   | 0.69697266 | 3.13E-28   | -0.5928691 | 6.07E-19 | -0.2397339 | 0.0010137  |
| 4.53E-44   | -0.4065995 | 9.31E-09   | 0.57616976 | 9.41E-18 | 0.34845965 | 1.17E-06   |
| 2.20E-48   | -0.4352064 | 5.99E-10   | 0.81792353 | 8.33E-46 | 0.50894525 | 1.39E-13   |
| 3.55E-45   | -0.4499558 | 1.31E-10   | 0.88830843 | 9.45E-64 | 0.50584227 | 2.07E-13   |
| 5.84E-23   | -0.4062135 | 9.64E-09   | 0.82150764 | 1.61E-46 | 0.38451295 | 6.53E-08   |
| 1.14E-49   | -0.527353  | 1.24E-14   | 0.85112741 | 4.19E-53 | 0.73105341 | 3.34E-32   |
| 0.18121192 | -0.3057669 | 2.31E-05   | 0.32718645 | 5.47E-06 | -0.0109719 | 0.88216379 |
| 8.97E-31   | -0.5255869 | 1.57E-14   | 0.77402641 | 3.60E-38 | 0.32375864 | 6.94E-06   |
| 1.37E-75   | -0.5507027 | 4.61E-16   | 0.90668784 | 1.61E-70 | 0.55332699 | 3.14E-16   |
| 3.81E-06   | 0.43451665 | 6.42E-10   | -0.6348036 | 2.93E-22 | 0.01828186 | 0.80491174 |
| 7.52E-32   | -0.4648177 | 2.64E-11   | 0.93619651 | 4.98E-85 | 0.65592316 | 3.95E-24   |
| 2.71E-31   | 0.23643929 | 0.00119449 | -0.7007469 | 1.21E-28 | -0.3000157 | 3.34E-05   |
| 0.00056518 | -0.3918604 | 3.47E-08   | 0.50867638 | 1.44E-13 | 0.7355861  | 8.91E-33   |
| 1.49E-26   | -0.4169175 | 3.56E-09   | 0.65342994 | 6.68E-24 | 0.53092282 | 7.61E-15   |
| 8.44E-32   | -0.2501217 | 0.00059539 | 0.52133512 | 2.78E-14 | 0.72550594 | 1.63E-31   |
| 0.00370549 | 0.27965392 | 0.00011567 | -0.3944551 | 2.76E-08 | -0.5070361 | 1.78E-13   |
| 1.89E-24   | 0.27904965 | 0.00011984 | -0.6932839 | 7.80E-28 | -0.7278498 | 8.37E-32   |
| 7.40E-46   | 0.68107039 | 1.46E-26   | -0.6640116 | 6.91E-25 | -0.4175402 | 3.36E-09   |

|            |            |            |            |          |            |            |
|------------|------------|------------|------------|----------|------------|------------|
| 5.45E-36   | 0.52367594 | 2.03E-14   | -0.8289064 | 4.81E-48 | -0.5918134 | 7.25E-19   |
| 3.65E-10   | -0.3995206 | 1.76E-08   | 0.51671992 | 5.10E-14 | 0.29251049 | 5.34E-05   |
| 7.72E-53   | -0.538604  | 2.62E-15   | 0.92912685 | 5.39E-81 | 0.52804743 | 1.13E-14   |
| 5.73E-44   | -0.5116257 | 9.88E-14   | 0.77830367 | 7.76E-39 | 0.33594628 | 2.94E-06   |
| 1.64E-43   | 0.46902898 | 1.65E-11   | -0.859619  | 2.92E-55 | -0.5627325 | 7.65E-17   |
| 2.24E-14   | 0.3023839  | 2.87E-05   | -0.699323  | 1.74E-28 | -0.5923572 | 6.62E-19   |
| 4.71E-78   | -0.5038659 | 2.65E-13   | 0.85996854 | 2.37E-55 | 0.51094769 | 1.08E-13   |
| 1.07E-05   | -0.4157347 | 3.98E-09   | 0.68483767 | 6.00E-27 | 0.60682281 | 5.42E-20   |
| 1.92E-16   | 0.24104966 | 0.0009488  | -0.5561871 | 2.05E-16 | -0.5276872 | 1.18E-14   |
| 2.59E-10   | 0.12793021 | 0.08267299 | -0.5270113 | 1.30E-14 | -0.7062237 | 2.98E-29   |
| 9.16E-11   | 0.53588607 | 3.83E-15   | -0.5727711 | 1.61E-17 | -0.3416433 | 1.94E-06   |
| 2.30E-46   | -0.3567088 | 6.23E-07   | 0.79003709 | 9.64E-41 | 0.44266452 | 2.81E-10   |
| 3.36E-12   | 0.49946546 | 4.58E-13   | -0.8001448 | 1.74E-42 | -0.3164812 | 1.14E-05   |
| 3.83E-39   | -0.2357212 | 0.00123763 | 0.62531562 | 1.83E-21 | 0.27815201 | 0.0001263  |
| 0.00016996 | 0.57082098 | 2.19E-17   | -0.5906613 | 8.80E-19 | -0.178528  | 0.01504264 |
| 0.00121925 | -0.4923731 | 1.09E-12   | 0.55212499 | 3.75E-16 | 0.28062817 | 0.00010923 |
| 5.75E-12   | 0.37637173 | 1.29E-07   | -0.7083227 | 1.72E-29 | -0.5297838 | 8.89E-15   |
| 2.98E-14   | -0.5104585 | 1.15E-13   | 0.60423555 | 8.56E-20 | 0.0588003  | 0.42659139 |
| 1.21E-13   | 0.68115387 | 1.43E-26   | -0.6350597 | 2.79E-22 | -0.532741  | 5.93E-15   |
| 2.64E-55   | -0.4212716 | 2.35E-09   | 0.85988275 | 2.49E-55 | 0.4391033  | 4.04E-10   |
| 4.29E-06   | -0.4449826 | 2.21E-10   | 0.69208077 | 1.05E-27 | 0.50721832 | 1.74E-13   |
| 3.26E-26   | -0.3198227 | 9.09E-06   | 0.64804192 | 2.05E-23 | 0.08073114 | 0.27465564 |
| 1.98E-15   | 0.32862685 | 4.95E-06   | -0.5142979 | 7.00E-14 | 0.00433401 | 0.9533108  |
| 2.19E-08   | -0.4199766 | 2.66E-09   | 0.77241079 | 6.36E-38 | 0.49091479 | 1.30E-12   |
| 7.70E-15   | 0.40085438 | 1.57E-08   | -0.6327243 | 4.40E-22 | -0.7348142 | 1.12E-32   |
| 3.60E-10   | 0.52449954 | 1.82E-14   | -0.7175319 | 1.48E-30 | -0.2976682 | 3.87E-05   |
| 1.73E-43   | -0.5254112 | 1.61E-14   | 0.94329942 | 1.41E-89 | 0.53418241 | 4.86E-15   |
| 1.94E-13   | -0.5326895 | 5.97E-15   | 0.6567807  | 3.29E-24 | 0.71053776 | 9.63E-30   |
| 6.70E-23   | 0.54424459 | 1.18E-15   | -0.6732557 | 8.81E-26 | -0.8338212 | 4.24E-49   |
| 2.50E-08   | 0.16776021 | 0.02245862 | -0.4723056 | 1.14E-11 | -0.7360532 | 7.76E-33   |
| 1.07E-17   | 0.29168297 | 5.62E-05   | -0.6038959 | 9.09E-20 | -0.8104055 | 2.33E-44   |
| 3.85E-26   | -0.3843837 | 6.60E-08   | 0.50325375 | 2.86E-13 | 0.84383813 | 2.34E-51   |
| 3.44E-23   | 0.40084508 | 1.57E-08   | -0.6871038 | 3.49E-27 | -0.8568327 | 1.54E-54   |
| 1.14E-12   | -0.415035  | 4.26E-09   | 0.49863976 | 5.08E-13 | 0.92022162 | 1.80E-76   |
| 6.49E-20   | -0.3361607 | 2.89E-06   | 0.50747751 | 1.68E-13 | 0.9038987  | 2.09E-69   |
| 1.21E-11   | -0.2682697 | 0.00022246 | 0.49206716 | 1.13E-12 | 0.830309   | 2.42E-48   |
| 2.13E-09   | -0.4792185 | 5.18E-12   | 0.49814614 | 5.39E-13 | 0.74145782 | 1.54E-33   |
| 1.28E-07   | -0.2902415 | 6.13E-05   | 0.44066667 | 3.44E-10 | 0.86512832 | 9.77E-57   |
| 4.99E-33   | -0.3347527 | 3.20E-06   | 0.55799184 | 1.57E-16 | 0.91611554 | 1.47E-74   |
| 5.02E-45   | -0.4614802 | 3.81E-11   | 0.72339073 | 2.94E-31 | 0.92627602 | 1.74E-79   |
| 9.50E-20   | -0.3584577 | 5.44E-07   | 0.55104284 | 4.39E-16 | 0.922701   | 1.12E-77   |
| 1.03E-77   | -0.4985624 | 5.12E-13   | 0.81813984 | 7.55E-46 | 0.87223931 | 9.66E-59   |
| 5.63E-31   | -0.3357393 | 2.98E-06   | 0.53831908 | 2.73E-15 | 0.9209374  | 8.15E-77   |
| 2.15E-25   | 0.44806081 | 1.60E-10   | -0.6317248 | 5.35E-22 | -0.8030523 | 5.27E-43   |
| 3.24E-30   | -0.4363093 | 5.36E-10   | 0.65637623 | 3.59E-24 | 0.93964113 | 3.64E-87   |
| 3.13E-14   | -0.3294471 | 4.67E-06   | 0.44688349 | 1.81E-10 | 0.9344162  | 5.69E-84   |



|            |            |            |            |          |            |          |
|------------|------------|------------|------------|----------|------------|----------|
| 2.34E-26   | 0.49416614 | 8.78E-13   | -0.692093  | 1.04E-27 | -0.8872113 | 2.19E-63 |
| 2.27E-15   | -0.4891189 | 1.61E-12   | 0.50661659 | 1.87E-13 | 0.84145766 | 8.31E-51 |
| 1.74E-34   | -0.3766949 | 1.26E-07   | 0.72113421 | 5.50E-31 | 0.85273497 | 1.68E-53 |
| 1.47E-08   | -0.2729203 | 0.00017089 | 0.44743151 | 1.71E-10 | 0.85077767 | 5.11E-53 |
| 6.41E-19   | -0.384099  | 6.76E-08   | 0.55326621 | 3.17E-16 | 0.91317955 | 2.98E-73 |
| 1.70E-16   | -0.3098474 | 1.77E-05   | 0.47670157 | 6.92E-12 | 0.87325592 | 4.88E-59 |
| 3.90E-08   | -0.1997029 | 0.00642331 | 0.40671868 | 9.20E-09 | 0.89502018 | 4.47E-66 |
| 8.99E-16   | -0.369848  | 2.20E-07   | 0.60469492 | 7.89E-20 | 0.94325302 | 1.52E-89 |
| 4.19E-12   | -0.3616634 | 4.23E-07   | 0.59174192 | 7.34E-19 | 0.90780937 | 5.62E-71 |
| 6.56E-20   | -0.3479635 | 1.21E-06   | 0.45757096 | 5.83E-11 | 0.90402205 | 1.87E-69 |
| 2.92E-18   | -0.5247115 | 1.77E-14   | 0.59369553 | 5.28E-19 | 0.89468351 | 5.90E-66 |
| 8.41E-11   | -0.5454373 | 9.91E-16   | 0.44643125 | 1.90E-10 | 0.72516196 | 1.79E-31 |
| 9.90E-31   | 0.52715826 | 1.27E-14   | -0.6506369 | 1.20E-23 | -0.8303641 | 2.36E-48 |
| 6.27E-10   | -0.2922339 | 5.43E-05   | 0.53048526 | 8.08E-15 | 0.82989657 | 2.97E-48 |
| 3.03E-18   | -0.4117976 | 5.76E-09   | 0.57858986 | 6.39E-18 | 0.88146427 | 1.58E-61 |
| 1.75E-18   | -0.3431974 | 1.73E-06   | 0.45439666 | 8.20E-11 | 0.92672024 | 1.02E-79 |
| 1.43E-28   | -0.4404874 | 3.51E-10   | 0.51064841 | 1.12E-13 | 0.85183617 | 2.80E-53 |
| 2.06E-16   | -0.4316024 | 8.59E-10   | 0.5379305  | 2.88E-15 | 0.85508191 | 4.32E-54 |
| 2.51E-20   | -0.3799094 | 9.63E-08   | 0.57016708 | 2.43E-17 | 0.85050741 | 5.95E-53 |
| 2.50E-24   | -0.2524037 | 0.0005281  | 0.57587167 | 9.87E-18 | 0.87917308 | 8.15E-61 |
| 9.56E-33   | -0.4346029 | 6.36E-10   | 0.74735467 | 2.53E-34 | 0.93323063 | 2.78E-83 |
| 5.14E-08   | -0.2460864 | 0.00073407 | 0.42087163 | 2.45E-09 | 0.83868146 | 3.56E-50 |
| 1.11E-06   | -0.3606185 | 4.60E-07   | 0.4393003  | 3.96E-10 | 0.83805828 | 4.91E-50 |
| 2.02E-16   | 0.27230424 | 0.00017702 | -0.6159623 | 1.04E-20 | -0.8500458 | 7.71E-53 |
| 6.70E-08   | -0.4148846 | 4.32E-09   | 0.50569338 | 2.10E-13 | 0.76135814 | 2.79E-36 |
| 2.02E-25   | -0.3936186 | 2.97E-08   | 0.60040406 | 1.67E-19 | 0.92533933 | 5.29E-79 |
| 1.00E-17   | 0.31642893 | 1.14E-05   | -0.5669903 | 3.98E-17 | -0.7982181 | 3.81E-42 |
| 1.43E-22   | -0.3308836 | 4.22E-06   | 0.52393411 | 1.96E-14 | 0.91685602 | 6.74E-75 |
| 1.21E-24   | -0.1942286 | 0.00806906 | 0.59722124 | 2.89E-19 | 0.91889769 | 7.62E-76 |
| 1.37E-05   | 0.01484423 | 0.84105367 | -0.3431341 | 1.74E-06 | -0.649822  | 1.42E-23 |
| 2.08E-12   | 0.30849028 | 1.94E-05   | -0.5198399 | 3.38E-14 | -0.8126742 | 8.67E-45 |
| 3.98E-22   | -0.379138  | 1.03E-07   | 0.61536718 | 1.16E-20 | 0.84732117 | 3.51E-52 |
| 1.82E-24   | -0.3306632 | 4.29E-06   | 0.53383759 | 5.09E-15 | 0.91380499 | 1.58E-73 |
| 7.75E-16   | -0.3541355 | 7.60E-07   | 0.65873094 | 2.17E-24 | 0.94384864 | 5.94E-90 |
| 3.28E-29   | -0.5360381 | 3.75E-15   | 0.72195666 | 4.38E-31 | 0.88362009 | 3.26E-62 |
| 0.00010963 | -0.144163  | 0.05025607 | 0.34018859 | 2.16E-06 | 0.74921413 | 1.41E-34 |
| 7.28E-19   | -0.5170875 | 4.86E-14   | 0.7034718  | 6.05E-29 | 0.91668792 | 8.05E-75 |
| 1.30E-20   | -0.427463  | 1.29E-09   | 0.60029804 | 1.70E-19 | 0.90909419 | 1.65E-71 |
| 7.86E-22   | -0.3551806 | 7.01E-07   | 0.58817307 | 1.33E-18 | 0.84641865 | 5.76E-52 |
| 3.02E-15   | -0.3295676 | 4.63E-06   | 0.54139846 | 1.76E-15 | 0.85623459 | 2.20E-54 |
| 2.08E-38   | -0.4718131 | 1.21E-11   | 0.71054894 | 9.60E-30 | 0.87683004 | 4.23E-60 |
| 1.76E-30   | -0.4323314 | 7.99E-10   | 0.73139397 | 3.03E-32 | 0.92751614 | 3.91E-80 |
| 3.02E-18   | -0.3558355 | 6.67E-07   | 0.69195795 | 1.08E-27 | 0.8875404  | 1.71E-63 |
| 2.75E-24   | -0.377194  | 1.21E-07   | 0.72326717 | 3.04E-31 | 0.92455948 | 1.32E-78 |
| 3.43E-25   | -0.4648445 | 2.63E-11   | 0.51213198 | 9.26E-14 | 0.83320109 | 5.79E-49 |
| 3.49E-30   | -0.4255471 | 1.56E-09   | 0.68062725 | 1.62E-26 | 0.9500943  | 1.63E-94 |

|          |            |            |            |          |            |          |
|----------|------------|------------|------------|----------|------------|----------|
| 3.05E-15 | -0.1667874 | 0.02326252 | 0.52243048 | 2.40E-14 | 0.80653957 | 1.22E-43 |
| 1.39E-05 | -0.30435   | 2.53E-05   | 0.43631973 | 5.36E-10 | 0.76275611 | 1.75E-36 |
| 1.53E-16 | -0.4197215 | 2.73E-09   | 0.68167674 | 1.26E-26 | 0.86817307 | 1.40E-57 |
| 5.99E-29 | -0.3966305 | 2.28E-08   | 0.56140224 | 9.37E-17 | 0.90432488 | 1.42E-69 |
| 5.22E-13 | -0.4217999 | 2.24E-09   | 0.60216224 | 1.23E-19 | 0.90852512 | 2.85E-71 |
| 2.07E-29 | -0.4633649 | 3.10E-11   | 0.67052353 | 1.63E-25 | 0.8966912  | 1.11E-66 |
| 5.43E-12 | -0.2724798 | 0.00017525 | 0.52818532 | 1.11E-14 | 0.81013944 | 2.62E-44 |
| 8.13E-14 | -0.3568348 | 6.17E-07   | 0.42479143 | 1.68E-09 | 0.83063636 | 2.06E-48 |
| 6.68E-20 | -0.5022621 | 3.24E-13   | 0.70137097 | 1.03E-28 | 0.89731974 | 6.57E-67 |

| MMblack    | p.MMblack  | MMbrown    | p.MMbrown  | MMgrey     | p.MMgrey   |
|------------|------------|------------|------------|------------|------------|
| 0.92033899 | 1.58E-76   | 0.6559668  | 3.91E-24   | 0.07184689 | 0.33112194 |
| 0.97318506 | 9.69E-119  | 0.64621169 | 2.99E-23   | 0.00161373 | 0.9826072  |
| 0.85190353 | 2.70E-53   | 0.50571505 | 2.10E-13   | -0.045436  | 0.53913296 |
| 0.96510029 | 1.99E-108  | 0.59263045 | 6.32E-19   | 0.013584   | 0.85439121 |
| 0.94326135 | 1.50E-89   | 0.71452466 | 3.33E-30   | -0.0052526 | 0.94343014 |
| 0.95283749 | 1.05E-96   | 0.59112889 | 8.14E-19   | 0.0290481  | 0.69468746 |
| 0.87527222 | 1.24E-59   | 0.54063891 | 1.97E-15   | 0.01645412 | 0.82408156 |
| 0.94404736 | 4.34E-90   | 0.72623497 | 1.32E-31   | 0.0739154  | 0.31735283 |
| 0.85612612 | 2.34E-54   | 0.51605122 | 5.57E-14   | 0.18707252 | 0.01077953 |
| 0.90870984 | 2.39E-71   | 0.54701125 | 7.90E-16   | -0.017405  | 0.81409511 |
| 0.91859573 | 1.06E-75   | 0.60442414 | 8.28E-20   | 0.04439746 | 0.54845705 |
| 0.73541244 | 9.38E-33   | 0.41984517 | 2.70E-09   | 0.25801127 | 0.00039146 |
| 0.92607966 | 2.20E-79   | 0.59984886 | 1.84E-19   | 0.01836035 | 0.80409108 |
| 0.93400598 | 9.89E-84   | 0.5949349  | 4.28E-19   | 0.0886693  | 0.23005229 |
| 0.94226677 | 7.02E-89   | 0.57844748 | 6.54E-18   | 0.07303422 | 0.32317227 |
| 0.93662906 | 2.73E-85   | 0.65524419 | 4.56E-24   | 0.09050629 | 0.22050323 |
| 0.5488613  | 6.04E-16   | 0.34426158 | 1.60E-06   | 0.19266807 | 0.00860221 |
| 0.96285976 | 5.33E-106  | 0.56492305 | 5.47E-17   | 0.0886548  | 0.23012879 |
| 0.8925142  | 3.44E-65   | 0.63140723 | 5.69E-22   | 0.04408056 | 0.5513179  |
| 0.47841907 | 5.68E-12   | 0.3706704  | 2.06E-07   | -0.2271998 | 0.00187036 |
| 0.87197312 | 1.15E-58   | 0.52296788 | 2.23E-14   | 0.07256253 | 0.32631555 |
| 0.82655366 | 1.50E-47   | 0.61943839 | 5.50E-21   | -0.0401066 | 0.58779834 |
| 0.90666574 | 1.64E-70   | 0.43202691 | 8.23E-10   | 0.10666208 | 0.14844282 |
| 0.95213581 | 3.92E-96   | 0.64912014 | 1.64E-23   | 0.06154409 | 0.40529284 |
| 0.88521878 | 9.91E-63   | 0.47938002 | 5.08E-12   | 0.01730379 | 0.81515631 |
| 0.8687526  | 9.61E-58   | 0.542988   | 1.41E-15   | -0.0492133 | 0.50589727 |
| 0.9712303  | 5.54E-116  | 0.63144557 | 5.64E-22   | 0.09721264 | 0.18804216 |
| 0.93109535 | 4.48E-82   | 0.52218333 | 2.48E-14   | -0.0004691 | 0.99494336 |
| 0.8341099  | 3.67E-49   | 0.58868456 | 1.22E-18   | 0.14672352 | 0.04626931 |
| 0.90920205 | 1.49E-71   | 0.65721881 | 3.00E-24   | 0.0607144  | 0.41166581 |
| 0.913683   | 1.79E-73   | 0.53001668 | 8.62E-15   | 0.07927885 | 0.28341036 |
| 0.91301933 | 3.50E-73   | 0.58027826 | 4.86E-18   | 0.05730304 | 0.43848163 |
| -0.3620334 | 4.11E-07   | -0.0139783 | 0.85021352 | -0.2849742 | 8.44E-05   |
| -0.2985379 | 3.67E-05   | -0.0951315 | 0.19771736 | -0.3831538 | 7.33E-08   |
| -0.1599244 | 0.0296692  | -0.1362711 | 0.06437666 | -0.3462633 | 1.38E-06   |
| -0.184292  | 0.01203217 | 0.07522176 | 0.30885172 | -0.2300699 | 0.00163018 |
| -0.453968  | 8.58E-11   | -0.2124065 | 0.00370014 | -0.2391204 | 0.00104534 |
| -0.1669747 | 0.02310585 | 0.00302616 | 0.96739052 | -0.3077623 | 2.03E-05   |
| -0.3408493 | 2.06E-06   | -0.2357288 | 0.00123716 | -0.1649085 | 0.02488544 |
| -0.287572  | 7.22E-05   | -0.1722325 | 0.01906365 | -0.403255  | 1.26E-08   |
| -0.301725  | 3.00E-05   | -0.2797272 | 0.00011517 | -0.0916526 | 0.21468937 |
| -0.1742527 | 0.01768222 | -0.3123782 | 1.50E-05   | 0.1372048  | 0.06255298 |
| -0.2690038 | 0.00021346 | -0.0685147 | 0.35409572 | -0.3907075 | 3.83E-08   |
| -0.2915389 | 5.67E-05   | -0.0866903 | 0.24066166 | -0.0267863 | 0.71740525 |
| -0.4072209 | 8.79E-09   | -0.3196217 | 9.22E-06   | -0.1283929 | 0.08155883 |

|            |            |            |            |            |            |
|------------|------------|------------|------------|------------|------------|
| -0.3084079 | 1.95E-05   | -0.1872749 | 0.01069304 | -0.3660938 | 2.98E-07   |
| -0.4494168 | 1.39E-10   | -0.3249358 | 6.40E-06   | -0.2126773 | 0.00365564 |
| -0.3806622 | 9.04E-08   | -0.2379514 | 0.00110813 | 0.0368744  | 0.61826121 |
| -0.3599179 | 4.86E-07   | -0.2688751 | 0.00021501 | -0.2732292 | 0.0001679  |
| -0.373423  | 1.65E-07   | -0.220223  | 0.00259428 | -0.209206  | 0.00426432 |
| -0.2352872 | 0.00126438 | -0.2901422 | 6.17E-05   | 0.2273893  | 0.00185356 |
| -0.1674106 | 0.02274475 | -0.1293484 | 0.07929636 | -0.272267  | 0.00017739 |
| -0.3996349 | 1.75E-08   | -0.0249847 | 0.73568138 | -0.1230457 | 0.09519548 |
| -0.3452128 | 1.49E-06   | -0.1649558 | 0.02484344 | -0.005234  | 0.9436303  |
| 0.17642632 | 0.01629379 | 0.25977963 | 0.0003557  | 0.14304559 | 0.05208335 |
| -0.3154542 | 1.22E-05   | -0.1302222 | 0.07727201 | -0.297372  | 3.95E-05   |
| -0.2285481 | 0.00175378 | -0.2479491 | 0.00066672 | -0.3111382 | 1.63E-05   |
| -0.4048679 | 1.09E-08   | -0.4106895 | 6.39E-09   | 0.15966933 | 0.02993379 |
| -0.3366244 | 2.80E-06   | -0.2298938 | 0.00164407 | -0.3494541 | 1.09E-06   |
| -0.5954485 | 3.92E-19   | -0.316071  | 1.17E-05   | -0.1260416 | 0.08734802 |
| -0.3501615 | 1.03E-06   | -0.3348933 | 3.17E-06   | -0.2536177 | 0.00049523 |
| -0.3087311 | 1.91E-05   | -0.1313415 | 0.07473986 | -0.4113857 | 5.99E-09   |
| -0.5586307 | 1.42E-16   | -0.3420527 | 1.88E-06   | -0.1893443 | 0.00984293 |
| -0.4093728 | 7.21E-09   | -0.1740435 | 0.01782112 | -0.1699715 | 0.0207199  |
| -0.2772355 | 0.00013323 | -0.1874617 | 0.01061373 | -0.2449469 | 0.00077831 |
| -0.3426262 | 1.81E-06   | -0.1570761 | 0.03273995 | -0.2282768 | 0.00177669 |
| -0.5203467 | 3.16E-14   | -0.3316152 | 4.01E-06   | -0.3103811 | 1.71E-05   |
| -0.3406673 | 2.09E-06   | -0.1634958 | 0.0261689  | -0.1477339 | 0.04477055 |
| -0.2943502 | 4.76E-05   | -0.1498695 | 0.04173593 | -0.4846166 | 2.75E-12   |
| -0.4745886 | 8.81E-12   | -0.1873098 | 0.01067817 | -0.1985611 | 0.00673948 |
| -0.3301135 | 4.46E-06   | -0.1550318 | 0.03510671 | -0.1681665 | 0.02213004 |
| -0.1543654 | 0.0359089  | -0.0206801 | 0.77993594 | -0.2155593 | 0.00321108 |
| -0.3587219 | 5.33E-07   | -0.1783359 | 0.01515344 | -0.2940858 | 4.84E-05   |
| -0.5645958 | 5.75E-17   | -0.3012955 | 3.08E-05   | -0.3717255 | 1.89E-07   |
| -0.2902621 | 6.13E-05   | -0.1650708 | 0.02474151 | -0.3338179 | 3.42E-06   |
| -0.2945022 | 4.72E-05   | -0.061884  | 0.40269899 | -0.2550334 | 0.0004593  |
| -0.4645428 | 2.72E-11   | -0.1236128 | 0.09366848 | -0.176072  | 0.01651342 |
| 0.44960228 | 1.36E-10   | 0.35834255 | 5.49E-07   | 0.24821431 | 0.00065761 |
| -0.4468115 | 1.83E-10   | -0.2622102 | 0.00031147 | -0.329392  | 4.69E-06   |
| -0.2141145 | 0.00342743 | -0.1589    | 0.03074401 | -0.1422875 | 0.05335418 |
| -0.3284719 | 5.00E-06   | -0.1275642 | 0.08356284 | -0.1600732 | 0.02951576 |
| 0.76275623 | 1.75E-36   | 0.42581525 | 1.52E-09   | 0.18182393 | 0.01324944 |
| 0.38537967 | 6.06E-08   | 0.12100047 | 0.10086732 | 0.18657307 | 0.01099568 |
| -0.3802412 | 9.36E-08   | -0.2664395 | 0.00024647 | -0.0992294 | 0.17900116 |
| -0.532154  | 6.43E-15   | -0.2796039 | 0.00011601 | -0.2995058 | 3.45E-05   |
| -0.3008985 | 3.16E-05   | -0.2737281 | 0.00016316 | -0.3028118 | 2.79E-05   |
| -0.2961661 | 4.25E-05   | -0.1453062 | 0.04844218 | -0.3012931 | 3.08E-05   |
| -0.2412008 | 0.0009416  | -0.1110049 | 0.13251715 | -0.3366284 | 2.80E-06   |
| 0.2758253  | 0.00014459 | 0.07309663 | 0.32275786 | 0.04298796 | 0.56123695 |
| -0.2662819 | 0.00024865 | -0.2023037 | 0.00575205 | -0.1085554 | 0.14133022 |
| -0.4769671 | 6.71E-12   | -0.1678091 | 0.02241882 | -0.3498501 | 1.05E-06   |

|            |            |            |            |            |            |
|------------|------------|------------|------------|------------|------------|
| -0.3784792 | 1.08E-07   | -0.1923548 | 0.0087129  | -0.3389344 | 2.37E-06   |
| -0.4417423 | 3.09E-10   | -0.2474145 | 0.00068544 | -0.293001  | 5.18E-05   |
| 0.47464085 | 8.76E-12   | 0.08978096 | 0.22423941 | 0.15152346 | 0.0395061  |
| -0.2288268 | 0.00173052 | -0.0127635 | 0.86309714 | -0.2791298 | 0.00011928 |
| 0.52576807 | 1.53E-14   | 0.23438245 | 0.00132187 | 0.24417375 | 0.0008097  |
| -0.1638072 | 0.02588125 | 0.07309081 | 0.32279648 | -0.2488631 | 0.0006358  |
| 0.34250082 | 1.82E-06   | 0.1896171  | 0.00973546 | 0.27380116 | 0.00016248 |
| -0.2360312 | 0.00121884 | -0.0224654 | 0.76148611 | -0.0865656 | 0.24134175 |
| -0.3670835 | 2.75E-07   | -0.1419637 | 0.0539046  | -0.2033533 | 0.00549942 |
| -0.4626738 | 3.34E-11   | -0.2628654 | 0.00030046 | -0.075554  | 0.30671383 |
| -0.4344292 | 6.48E-10   | -0.2639083 | 0.00028367 | -0.1123598 | 0.12782716 |
| -0.3456816 | 1.44E-06   | -0.0967894 | 0.18998128 | -0.0779442 | 0.2916198  |
| -0.3335171 | 3.50E-06   | -0.1916404 | 0.00897012 | -0.2188975 | 0.00275762 |
| 0.38869772 | 4.56E-08   | -0.0377991 | 0.60947588 | 0.22352782 | 0.00222452 |
| -0.2410969 | 0.00094655 | -0.1198301 | 0.10423106 | -0.4389326 | 4.11E-10   |
| -0.2760353 | 0.00014284 | -0.2665319 | 0.0002452  | -0.2028223 | 0.00562595 |
| -0.3360042 | 2.93E-06   | -0.1702102 | 0.02053941 | -0.3623306 | 4.02E-07   |
| 0.52304829 | 2.21E-14   | 0.24899188 | 0.00063155 | 0.21242327 | 0.00369737 |
| 0.0217325  | 0.76904437 | 0.0073406  | 0.9210052  | -0.2150234 | 0.00328984 |
| 0.50220711 | 3.26E-13   | 0.31267367 | 1.47E-05   | 0.22918405 | 0.00170113 |
| -0.481127  | 4.15E-12   | -0.2618459 | 0.00031776 | -0.0595205 | 0.42093937 |
| -0.5372272 | 3.18E-15   | -0.2972498 | 3.98E-05   | -0.242309  | 0.00089028 |
| -0.1763436 | 0.01634485 | -0.0566098 | 0.44405059 | -0.3399457 | 2.20E-06   |
| -0.3069813 | 2.14E-05   | -0.1397747 | 0.05775116 | -0.0771721 | 0.29644    |
| -0.2467147 | 0.00071068 | -0.2731899 | 0.00016827 | -0.2859941 | 7.94E-05   |
| 0.39734059 | 2.14E-08   | 0.07700577 | 0.29748566 | 0.20818349 | 0.00446023 |
| -0.2410457 | 0.00094899 | -0.1377815 | 0.06144792 | -0.0632904 | 0.39207207 |
| -0.4231357 | 1.97E-09   | -0.1984812 | 0.00676213 | -0.2424356 | 0.00088459 |
| -0.3685664 | 2.44E-07   | -0.1810463 | 0.01365472 | -0.3513827 | 9.38E-07   |
| -0.30177   | 2.99E-05   | -0.2971159 | 4.01E-05   | -0.3075011 | 2.07E-05   |
| -0.2594962 | 0.00036122 | -0.1174427 | 0.11136648 | 0.10780066 | 0.1441337  |
| -0.3557248 | 6.73E-07   | -0.1960394 | 0.00748737 | -0.3219288 | 7.87E-06   |
| -0.3170523 | 1.10E-05   | -0.0013408 | 0.98554815 | -0.0738861 | 0.31754543 |
| -0.3207185 | 8.55E-06   | -0.231387  | 0.00152969 | -0.3451875 | 1.49E-06   |
| -0.3389545 | 2.36E-06   | -0.1911125 | 0.00916449 | -0.1020892 | 0.16673614 |
| -0.3063087 | 2.23E-05   | 0.0111902  | 0.87983662 | -0.1308382 | 0.07587002 |
| -0.3561471 | 6.51E-07   | -0.244608  | 0.00079193 | -0.2199834 | 0.00262314 |
| -0.4261479 | 1.47E-09   | -0.2060904 | 0.00488668 | -0.2037101 | 0.00541582 |
| -0.4523556 | 1.02E-10   | -0.2807755 | 0.00010828 | -0.0343666 | 0.64235713 |
| -0.314559  | 1.30E-05   | -0.1261142 | 0.08716445 | -0.0549407 | 0.45762031 |
| 0.45446236 | 8.14E-11   | 0.08058185 | 0.27554704 | 0.04853196 | 0.51181213 |
| -0.4623577 | 3.46E-11   | -0.3393145 | 2.30E-06   | -0.4864963 | 2.21E-12   |
| -0.4274822 | 1.29E-09   | -0.306557  | 2.20E-05   | -0.2563865 | 0.00042723 |
| 0.6856908  | 4.89E-27   | 0.33569089 | 2.99E-06   | 0.11939899 | 0.10549228 |
| -0.1962782 | 0.00741351 | -0.2445855 | 0.00079284 | 0.18328488 | 0.01251647 |
| -0.3419724 | 1.90E-06   | -0.2678675 | 0.00022754 | -0.1419328 | 0.05395737 |

|            |            |            |            |            |            |
|------------|------------|------------|------------|------------|------------|
| -0.2244642 | 0.00212885 | -0.1851382 | 0.01163806 | -0.2402859 | 0.000986   |
| -0.2019278 | 0.00584502 | -0.1071716 | 0.14650244 | -0.4708903 | 1.34E-11   |
| -0.3868573 | 5.34E-08   | -0.2250617 | 0.00206976 | 0.01757624 | 0.81229934 |
| 0.27013809 | 0.00020021 | 0.16697282 | 0.0231074  | 0.2152262  | 0.00325984 |
| -0.4245338 | 1.72E-09   | -0.1723597 | 0.01897401 | -0.0317306 | 0.66809374 |
| 0.02346735 | 0.75118999 | -0.0204032 | 0.78280776 | -0.2417969 | 0.00091367 |
| -0.0951754 | 0.19750979 | -0.2214623 | 0.00244955 | -0.2090721 | 0.00428953 |
| -0.2921138 | 5.47E-05   | -0.1768191 | 0.01605333 | -0.2853844 | 8.23E-05   |
| -0.2813071 | 0.00010494 | -0.2152779 | 0.00325222 | -0.3328489 | 3.67E-06   |
| -0.4296295 | 1.04E-09   | -0.2514342 | 0.00055578 | -0.0494698 | 0.50367992 |
| -0.2610319 | 0.00033223 | -0.0249836 | 0.73569216 | -0.0571239 | 0.43991691 |
| -0.242965  | 0.00086113 | -0.1989573 | 0.00662824 | -0.2077315 | 0.00454938 |
| -0.3646704 | 3.34E-07   | -0.1692119 | 0.02130356 | -0.0264309 | 0.72099831 |
| -0.4737411 | 9.71E-12   | -0.2955177 | 4.43E-05   | -0.3212715 | 8.24E-06   |
| -0.4458756 | 2.01E-10   | -0.3159978 | 1.18E-05   | -0.2789985 | 0.0001202  |
| -0.2887702 | 6.71E-05   | -0.1148901 | 0.11941247 | -0.209755  | 0.00416236 |
| -0.2177174 | 0.00291084 | -0.0268408 | 0.71685462 | 0.10436461 | 0.15743396 |
| -0.3304809 | 4.34E-06   | -0.0749914 | 0.31034013 | -0.4371185 | 4.94E-10   |
| -0.0802293 | 0.27765975 | -0.0418998 | 0.57119963 | -0.2802918 | 0.00011141 |
| -0.1624496 | 0.02715563 | 0.00675587 | 0.92727964 | -0.1191259 | 0.10629729 |
| -0.4262139 | 1.46E-09   | -0.236645  | 0.00118239 | -0.3366127 | 2.80E-06   |
| -0.3424838 | 1.83E-06   | -0.1686141 | 0.02177286 | -0.5097514 | 1.26E-13   |
| -0.2007716 | 0.00613944 | -0.1049053 | 0.15528193 | -0.1207468 | 0.10158906 |
| 0.36967041 | 2.24E-07   | 0.18694372 | 0.01083491 | 0.41108203 | 6.16E-09   |
| -0.3672739 | 2.71E-07   | -0.1734425 | 0.01822543 | -0.1442314 | 0.05014601 |
| -0.3664504 | 2.90E-07   | -0.1766143 | 0.01617829 | -0.0629928 | 0.39430643 |
| 0.31373925 | 1.37E-05   | 0.05506923 | 0.45656746 | 0.18075312 | 0.01381031 |
| -0.2444434 | 0.00079862 | -0.1587289 | 0.03092681 | -0.288129  | 6.98E-05   |
| 0.01098071 | 0.88206969 | -0.1168034 | 0.11334059 | -0.2170659 | 0.00299868 |
| -0.3181529 | 1.02E-05   | -0.1629544 | 0.02667559 | -0.2547372 | 0.00046661 |
| -0.4270078 | 1.35E-09   | -0.2875137 | 7.24E-05   | -0.2682595 | 0.00022259 |
| -0.1734989 | 0.01818714 | -0.0226788 | 0.75928998 | -0.1835133 | 0.01240514 |
| -0.4724236 | 1.13E-11   | -0.1898742 | 0.00963511 | 0.02774742 | 0.70771999 |
| -0.3830692 | 7.38E-08   | -0.1533961 | 0.0371034  | -0.0199727 | 0.78728045 |
| -0.2451007 | 0.0007722  | -0.11579   | 0.11652591 | -0.1321003 | 0.0730619  |
| -0.3385378 | 2.44E-06   | -0.2333129 | 0.00139291 | -0.2319324 | 0.00148976 |
| -0.1273891 | 0.0839915  | -0.1190358 | 0.10656405 | -0.5074589 | 1.68E-13   |
| -0.1420978 | 0.05367608 | -0.0462624 | 0.53176948 | -0.0668714 | 0.36578455 |
| 0.33287008 | 3.66E-06   | 0.09321734 | 0.20693111 | 0.07555926 | 0.30667991 |
| -0.3588301 | 5.29E-07   | -0.2153618 | 0.00323991 | -0.1236323 | 0.09361644 |
| -0.3724697 | 1.78E-07   | -0.1297458 | 0.07837041 | 0.01933669 | 0.79390036 |
| -0.426504  | 1.42E-09   | -0.2067499 | 0.00474853 | -0.3912116 | 3.67E-08   |
| -0.2394388 | 0.00102881 | -0.0521111 | 0.48114472 | -0.323843  | 6.90E-06   |
| -0.3874069 | 5.10E-08   | -0.1729599 | 0.01855584 | -0.2146181 | 0.00335057 |
| -0.3296491 | 4.60E-06   | -0.1427959 | 0.05249911 | -0.0581649 | 0.43161426 |
| -0.1901043 | 0.00954607 | 0.0143289  | 0.84650233 | -0.1325266 | 0.07213273 |

|            |            |            |            |            |            |
|------------|------------|------------|------------|------------|------------|
| -0.1456265 | 0.04794386 | 0.0399891  | 0.58889343 | -0.3727015 | 1.75E-07   |
| -0.4526666 | 9.86E-11   | -0.2354554 | 0.00125395 | -0.3050502 | 2.42E-05   |
| -0.3229281 | 7.35E-06   | -0.0296178 | 0.68900725 | -0.1243659 | 0.09167107 |
| -0.3862544 | 5.63E-08   | -0.0805106 | 0.27597342 | -0.1254884 | 0.08875682 |
| -0.1797387 | 0.0143607  | -0.163052  | 0.02658369 | -0.2415443 | 0.00092541 |
| -0.4223991 | 2.11E-09   | -0.2223001 | 0.00235589 | -0.2892305 | 6.52E-05   |
| -0.2549224 | 0.00046203 | -0.1208785 | 0.10121386 | -0.3638461 | 3.56E-07   |
| -0.4952767 | 7.67E-13   | -0.2462768 | 0.00072691 | -0.1488606 | 0.04314734 |
| -0.4717244 | 1.22E-11   | -0.3014091 | 3.06E-05   | -0.2290156 | 0.00171493 |
| -0.3727472 | 1.74E-07   | -0.2875484 | 7.23E-05   | -0.2516001 | 0.00055095 |
| -0.5565509 | 1.94E-16   | -0.3458584 | 1.42E-06   | -0.3179207 | 1.03E-05   |
| -0.3556524 | 6.76E-07   | -0.1840269 | 0.01215801 | -0.2136928 | 0.00349303 |
| -0.2643139 | 0.00027738 | -0.0690988 | 0.34999799 | -0.2598593 | 0.00035416 |
| -0.2811763 | 0.00010575 | -0.1291936 | 0.07965953 | -0.1373113 | 0.06234772 |
| -0.3354483 | 3.05E-06   | -0.0293608 | 0.6915674  | -0.2941212 | 4.83E-05   |
| -0.2805872 | 0.00010949 | -0.1451091 | 0.04875096 | -0.2205285 | 0.0025579  |
| -0.3709736 | 2.01E-07   | -0.1627339 | 0.02688441 | -0.3068265 | 2.16E-05   |
| 0.65070531 | 1.18E-23   | 0.35954553 | 5.00E-07   | 0.17056774 | 0.0202715  |
| -0.2462438 | 0.00072815 | -0.2578094 | 0.00039575 | -0.2405811 | 0.00097147 |
| -0.0924454 | 0.21073305 | -0.1527398 | 0.03793103 | -0.2017368 | 0.00589277 |
| -0.2680958 | 0.00022465 | 0.02232784 | 0.76290306 | -0.2601209 | 0.00034916 |
| 0.21075438 | 0.00398237 | 0.18466683 | 0.01185616 | 0.35709271 | 6.05E-07   |
| -0.2740569 | 0.00016011 | -0.2170914 | 0.00299519 | -0.3434254 | 1.70E-06   |
| 0.3168584  | 1.11E-05   | 0.16700759 | 0.02307842 | 0.21350333 | 0.00352286 |
| -0.2603252 | 0.00034529 | -0.038599  | 0.60192183 | -0.2322024 | 0.00147035 |
| -0.2685302 | 0.00021923 | -0.0389817 | 0.59832207 | -0.3422007 | 1.86E-06   |
| -0.2225435 | 0.0023293  | -0.1278276 | 0.08292165 | -0.0751952 | 0.30902275 |
| -0.364908  | 3.28E-07   | -0.3143897 | 1.31E-05   | -0.1858654 | 0.01130847 |
| 0.27927483 | 0.00011827 | 0.10419089 | 0.15813013 | 0.27552622 | 0.00014711 |
| 0.20486298 | 0.00515345 | 0.23679882 | 0.00117342 | -0.0214525 | 0.77193794 |
| -0.531081  | 7.45E-15   | -0.2569072 | 0.00041545 | -0.3073692 | 2.08E-05   |
| -0.2595406 | 0.00036035 | -0.11587   | 0.11627186 | -0.1677161 | 0.02249455 |
| -0.4594746 | 4.74E-11   | -0.2155986 | 0.00320537 | -0.3841705 | 6.72E-08   |
| -0.3742515 | 1.54E-07   | -0.1830407 | 0.01263644 | -0.0670928 | 0.36419593 |
| -0.1601571 | 0.0294296  | -0.1187522 | 0.10740674 | -0.4329105 | 7.54E-10   |
| -0.3961911 | 2.37E-08   | -0.3352089 | 3.10E-06   | -0.3830321 | 7.40E-08   |
| -0.2581788 | 0.00038794 | -0.05215   | 0.4808175  | -0.2011799 | 0.006034   |
| -0.2073806 | 0.0046197  | -0.1286453 | 0.08095634 | -0.181108  | 0.01362217 |
| -0.4165349 | 3.69E-09   | -0.0736155 | 0.31932604 | -0.01214   | 0.86972399 |
| 0.55946756 | 1.26E-16   | 0.1094959  | 0.13789498 | 0.1417968  | 0.05419029 |
| -0.4089821 | 7.48E-09   | -0.1305861 | 0.07644126 | -0.2238791 | 0.00218818 |
| -0.3990982 | 1.83E-08   | -0.2929833 | 5.18E-05   | -0.3249218 | 6.41E-06   |
| -0.2847183 | 8.57E-05   | -0.1165992 | 0.11397711 | -0.187177  | 0.01073479 |
| -0.358364  | 5.48E-07   | -0.1121471 | 0.12855492 | -0.1356269 | 0.06566007 |
| -0.3007559 | 3.19E-05   | -0.1906762 | 0.00932794 | -0.2985379 | 3.67E-05   |
| 0.27889995 | 0.0001209  | 0.1495882  | 0.0421255  | 0.05872478 | 0.42718662 |

|            |            |            |            |            |            |
|------------|------------|------------|------------|------------|------------|
| -0.1831681 | 0.01257372 | -0.2083103 | 0.00443551 | -0.3134528 | 1.40E-05   |
| -0.3214909 | 8.11E-06   | -0.259859  | 0.00035417 | -0.217603  | 0.00292608 |
| -0.3984758 | 1.94E-08   | -0.1187667 | 0.1073635  | -0.045787  | 0.53599935 |
| 0.17528522 | 0.01701035 | 0.24481287 | 0.00078367 | 0.37853649 | 1.08E-07   |
| -0.2794992 | 0.00011672 | -0.1681484 | 0.02214458 | -0.3673551 | 2.69E-07   |
| -0.2861522 | 7.86E-05   | -0.1928896 | 0.00852466 | -0.114504  | 0.12066796 |
| -0.4026471 | 1.33E-08   | -0.3137135 | 1.37E-05   | -0.1925593 | 0.00864051 |
| -0.083124  | 0.26063398 | -0.1403528 | 0.05671397 | -0.2451797 | 0.00076908 |
| 0.30433676 | 2.53E-05   | 0.08519089 | 0.24892475 | 0.20955328 | 0.00419957 |
| 0.0264772  | 0.72052994 | -0.055611  | 0.45214346 | -0.2556736 | 0.00044386 |
| -0.4302038 | 9.86E-10   | -0.2519035 | 0.00054222 | -0.3544517 | 7.42E-07   |
| -0.4692176 | 1.62E-11   | -0.3425698 | 1.81E-06   | -0.2958246 | 4.35E-05   |
| 0.39546027 | 2.53E-08   | 0.18951612 | 0.00977512 | 0.21928366 | 0.0027091  |
| -0.262095  | 0.00031345 | 0.01645902 | 0.82403012 | -0.4615073 | 3.80E-11   |
| -0.2398998 | 0.00100531 | -0.2297641 | 0.00165436 | -0.357892  | 5.69E-07   |
| -0.2088054 | 0.00434014 | -0.1294666 | 0.07902015 | -0.2075302 | 0.0045896  |
| -0.2909066 | 5.89E-05   | -0.051794  | 0.48382117 | -0.0913405 | 0.2162611  |
| -0.4928792 | 1.03E-12   | -0.3244473 | 6.62E-06   | -0.2820797 | 0.00010025 |
| -0.5652525 | 5.20E-17   | -0.3229506 | 7.34E-06   | -0.2474755 | 0.00068328 |
| -0.4757002 | 7.76E-12   | -0.2607976 | 0.00033651 | -0.0434488 | 0.55704332 |
| 0.4414925  | 3.17E-10   | 0.18021805 | 0.01409828 | 0.16222624 | 0.02737036 |
| -0.2736129 | 0.00016424 | -0.1364001 | 0.06412216 | -0.2290787 | 0.00170975 |
| -0.4540684 | 8.49E-11   | -0.3282678 | 5.07E-06   | -0.0534748 | 0.46972643 |
| -0.4942534 | 8.69E-13   | -0.3998424 | 1.71E-08   | -0.2936837 | 4.96E-05   |
| 0.57485322 | 1.16E-17   | 0.21841077 | 0.00281991 | 0.4352902  | 5.94E-10   |
| -0.2908053 | 5.93E-05   | -0.2026584 | 0.00566553 | -0.2509754 | 0.00056934 |
| -0.3526756 | 8.50E-07   | -0.2250491 | 0.00207099 | -0.2433409 | 0.00084483 |
| -0.3282895 | 5.07E-06   | -0.2335696 | 0.00137555 | -0.3474895 | 1.26E-06   |
| -0.4040916 | 1.17E-08   | -0.1640028 | 0.02570197 | -0.2536353 | 0.00049477 |
| -0.3581001 | 5.60E-07   | -0.1194974 | 0.10520346 | -0.0167629 | 0.82083492 |
| -0.4019391 | 1.42E-08   | -0.1888714 | 0.01003177 | -0.3852991 | 6.11E-08   |
| -0.3735612 | 1.63E-07   | -0.2590256 | 0.00037056 | -0.0492897 | 0.5052364  |
| -0.377403  | 1.19E-07   | -0.1410848 | 0.05542279 | -0.2802324 | 0.0001118  |
| -0.3233901 | 7.12E-06   | -0.2318158 | 0.00149822 | -0.3794526 | 1.00E-07   |
| -0.3728517 | 1.73E-07   | -0.1933938 | 0.0083505  | -0.0956047 | 0.19548633 |
| -0.518821  | 3.87E-14   | -0.2962652 | 4.23E-05   | -0.3958168 | 2.45E-08   |
| -0.3459424 | 1.41E-06   | -0.1509717 | 0.04023857 | -0.3508735 | 9.75E-07   |
| 0.36066115 | 4.58E-07   | 0.06486227 | 0.38039608 | 0.23200372 | 0.00148461 |
| 0.37027345 | 2.13E-07   | 0.06448464 | 0.3831815  | 0.17861837 | 0.0149908  |
| 0.18329627 | 0.0125109  | -0.1347748 | 0.06738999 | 0.0500988  | 0.49826372 |
| -0.5377852 | 2.94E-15   | -0.2801563 | 0.0001123  | -0.4794475 | 5.04E-12   |
| -0.4885178 | 1.73E-12   | -0.3186725 | 9.83E-06   | -0.0895248 | 0.22556956 |
| -0.3759716 | 1.34E-07   | -0.0905517 | 0.22027085 | -0.1284036 | 0.08153317 |
| -0.3106161 | 1.68E-05   | -0.2230387 | 0.00227604 | -0.120412  | 0.10254766 |
| -0.4765496 | 7.04E-12   | -0.2864238 | 7.73E-05   | -0.3444621 | 1.58E-06   |
| -0.2426966 | 0.00087295 | -0.0761453 | 0.30293262 | -0.3737851 | 1.60E-07   |



|            |            |            |            |            |            |
|------------|------------|------------|------------|------------|------------|
| -0.4270194 | 1.35E-09   | -0.2941004 | 4.84E-05   | -0.2336093 | 0.00137288 |
| 0.44679079 | 1.83E-10   | 0.1465859  | 0.04647666 | 0.18542835 | 0.01150555 |
| 0.55377297 | 2.94E-16   | 0.25063671 | 0.00057954 | 0.22914593 | 0.00170424 |
| -0.2216628 | 0.00242683 | -0.0879698 | 0.23376389 | -0.4216414 | 2.27E-09   |
| 0.44475946 | 2.26E-10   | 0.21597721 | 0.00315084 | 0.33997653 | 2.19E-06   |
| 0.51749097 | 4.61E-14   | 0.27153188 | 0.00018498 | 0.25669249 | 0.00042027 |
| 0.65092923 | 1.13E-23   | 0.32686052 | 5.60E-06   | 0.16265754 | 0.02695702 |
| 0.35186199 | 9.04E-07   | 0.2138163  | 0.0034737  | 0.20173415 | 0.00589343 |
| -0.1534807 | 0.03699781 | 0.00847881 | 0.90880606 | -0.3235845 | 7.03E-06   |
| -0.3410137 | 2.03E-06   | -0.1732449 | 0.01836008 | -0.1589377 | 0.03070386 |
| -0.4308953 | 9.21E-10   | -0.102814  | 0.16372976 | -0.0853024 | 0.24830345 |
| -0.4116703 | 5.83E-09   | -0.2914521 | 5.70E-05   | -0.2004083 | 0.00623467 |
| -0.2635344 | 0.00028958 | -0.2044997 | 0.00523486 | -0.2977845 | 3.84E-05   |
| -0.3934964 | 3.01E-08   | -0.1712308 | 0.01978272 | 0.00145279 | 0.98434165 |
| -0.4123141 | 5.49E-09   | -0.258778  | 0.00037557 | -0.1428773 | 0.05236329 |
| -0.396073  | 2.40E-08   | -0.3270649 | 5.52E-06   | -0.1999765 | 0.00634954 |
| 0.73674426 | 6.33E-33   | 0.38645422 | 5.53E-08   | 0.17516662 | 0.01708638 |
| -0.431624  | 8.57E-10   | -0.0092321 | 0.90074358 | -0.1891099 | 0.00993615 |
| -0.1260262 | 0.08738708 | 0.0307818  | 0.67745494 | -0.2240196 | 0.0021738  |
| -0.2602303 | 0.00034708 | -0.147894  | 0.04453683 | -0.0181292 | 0.80650896 |
| -0.3071713 | 2.11E-05   | -0.208819  | 0.00433754 | 0.01849765 | 0.80265587 |
| -0.3513644 | 9.39E-07   | -0.1890589 | 0.00995652 | -0.2147372 | 0.00333262 |
| -0.0252631 | 0.73284668 | 0.05685091 | 0.44210891 | 0.16781981 | 0.02241016 |
| -0.4125794 | 5.36E-09   | -0.305439  | 2.36E-05   | -0.2973068 | 3.96E-05   |
| -0.2844123 | 8.73E-05   | -0.1768909 | 0.01600969 | -0.2520684 | 0.00053752 |
| -0.5191633 | 3.70E-14   | -0.3524964 | 8.62E-07   | -0.3979493 | 2.03E-08   |
| -0.3890637 | 4.42E-08   | -0.2054235 | 0.00503005 | -0.3719065 | 1.86E-07   |
| -0.3897273 | 4.17E-08   | -0.2089378 | 0.00431495 | -0.016851  | 0.81990986 |
| -0.2124027 | 0.00370077 | -0.1090184 | 0.1396311  | -0.0638293 | 0.38804501 |
| -0.1158554 | 0.11631832 | -0.0685986 | 0.3535055  | -0.2188339 | 0.00276569 |
| -0.2348737 | 0.00129037 | -0.1159763 | 0.11593532 | -0.3624744 | 3.97E-07   |
| -0.483883  | 3.00E-12   | -0.166292  | 0.02368129 | -0.1213511 | 0.09987641 |
| -0.3387744 | 2.40E-06   | -0.1486703 | 0.0434179  | -0.260031  | 0.00035087 |
| -0.4416066 | 3.13E-10   | -0.2848226 | 8.51E-05   | -0.0352526 | 0.63379952 |
| -0.2313276 | 0.0015341  | -0.1470002 | 0.04585475 | 0.07231525 | 0.32797122 |
| -0.3699773 | 2.18E-07   | -0.1398033 | 0.05769957 | -0.2249352 | 0.00208214 |
| -0.5110614 | 1.06E-13   | -0.2727287 | 0.00017277 | -0.2638659 | 0.00028433 |
| -0.3992255 | 1.81E-08   | -0.1851321 | 0.01164086 | -0.3022763 | 2.89E-05   |
| -0.3670823 | 2.75E-07   | -0.237897  | 0.00111114 | -0.2250302 | 0.00207284 |
| -0.2990211 | 3.56E-05   | -0.1746316 | 0.01743305 | -0.2260222 | 0.0019779  |
| -0.2954892 | 4.44E-05   | -0.1327041 | 0.07174862 | -0.165676  | 0.02421117 |
| 0.31007219 | 1.75E-05   | 0.08656942 | 0.24132082 | 0.24970544 | 0.00060848 |
| 0.54482748 | 1.08E-15   | 0.26716565 | 0.00023667 | 0.18675017 | 0.0109186  |
| -0.2347583 | 0.00129771 | -0.19496   | 0.00782945 | -0.0795933 | 0.28149887 |
| -0.4819238 | 3.78E-12   | -0.2684017 | 0.00022082 | -0.2248708 | 0.00208847 |
| -0.4273713 | 1.30E-09   | -0.2140118 | 0.00344331 | -0.1150248 | 0.11897708 |

|            |            |            |            |            |            |
|------------|------------|------------|------------|------------|------------|
| -0.2029264 | 0.00560094 | -0.1217762 | 0.09868535 | -0.2449277 | 0.00077907 |
| 0.32957947 | 4.63E-06   | 0.11850915 | 0.10813326 | 0.17061812 | 0.020234   |
| 0.68327984 | 8.67E-27   | 0.37454465 | 1.50E-07   | 0.2484837  | 0.00064847 |
| -0.0817897 | 0.26839096 | -0.1500896 | 0.04143326 | -0.2918546 | 5.56E-05   |
| -0.3504822 | 1.00E-06   | -0.3374733 | 2.63E-06   | -0.3199549 | 9.01E-06   |
| 0.38229099 | 7.88E-08   | 0.19467887 | 0.0079208  | 0.26440031 | 0.00027605 |
| -0.1832192 | 0.01254864 | -0.0248996 | 0.73654783 | -0.4268238 | 1.37E-09   |
| -0.2519306 | 0.00054144 | -0.0525654 | 0.4773249  | -0.2391209 | 0.00104532 |
| -0.2304871 | 0.00159772 | -0.063695  | 0.38904563 | -0.2416434 | 0.00092079 |
| -0.2804374 | 0.00011046 | -0.2981865 | 3.75E-05   | -0.3304376 | 4.36E-06   |
| -0.3900946 | 4.04E-08   | -0.2910819 | 5.83E-05   | -0.2449547 | 0.000778   |
| -0.2380811 | 0.001101   | -0.0451948 | 0.54129121 | -0.2124811 | 0.00368782 |
| -0.1262577 | 0.08680255 | -0.0239473 | 0.74627329 | -0.2929174 | 5.21E-05   |
| -0.157628  | 0.03212474 | -0.1645252 | 0.02522828 | -0.1810429 | 0.01365652 |
| -0.4354724 | 5.83E-10   | -0.2253535 | 0.00204145 | -0.3781689 | 1.11E-07   |
| -0.2428521 | 0.00086609 | -0.106816  | 0.14785453 | -0.2698973 | 0.00020296 |
| -0.3230423 | 7.29E-06   | -0.1887266 | 0.01009019 | -0.2473737 | 0.00068689 |
| -0.1445106 | 0.04969865 | -0.005003  | 0.94611452 | -0.4791318 | 5.23E-12   |
| -0.0613576 | 0.40672019 | 0.02432185 | 0.74244341 | -0.4357449 | 5.68E-10   |
| -0.4466275 | 1.86E-10   | -0.2815426 | 0.00010349 | -0.0360515 | 0.62612468 |
| -0.434144  | 6.66E-10   | -0.1418222 | 0.05414675 | -0.2963095 | 4.22E-05   |
| -0.3806223 | 9.07E-08   | -0.1604279 | 0.02915271 | -0.3198262 | 9.09E-06   |
| -0.3689893 | 2.36E-07   | -0.2596913 | 0.00035741 | -0.1340204 | 0.06895216 |
| -0.0344455 | 0.6415932  | -0.1093187 | 0.13853711 | -0.1655757 | 0.0242984  |
| -0.3883441 | 4.70E-08   | -0.3535316 | 7.96E-07   | -0.1404485 | 0.05654375 |
| -0.2239408 | 0.00218185 | -0.0945291 | 0.20058461 | -0.3265018 | 5.74E-06   |
| -0.427256  | 1.32E-09   | -0.2302    | 0.00162    | -0.2455533 | 0.00075447 |
| -0.2301409 | 0.00162462 | 0.01141146 | 0.87747914 | -0.1224346 | 0.09686315 |
| -0.1831467 | 0.01258422 | -0.0992354 | 0.17897487 | -0.1765547 | 0.01621487 |
| -0.5600267 | 1.15E-16   | -0.3721292 | 1.83E-07   | -0.2376132 | 0.00112694 |
| 0.13911576 | 0.05895246 | -0.0959262 | 0.19398097 | 0.16225885 | 0.02733892 |
| -0.3381221 | 2.51E-06   | -0.3718098 | 1.88E-07   | 0.14279765 | 0.05249617 |
| 0.18151831 | 0.01340744 | 0.07066632 | 0.33914965 | 0.32110307 | 8.33E-06   |
| 0.44929286 | 1.41E-10   | 0.13140498 | 0.07459834 | 0.16048569 | 0.02909397 |
| -0.4311824 | 8.95E-10   | -0.3863341 | 5.59E-08   | -0.3707479 | 2.05E-07   |
| -0.2941496 | 4.82E-05   | -0.1247824 | 0.09058088 | -0.2234625 | 0.00223134 |
| -0.2111066 | 0.00392061 | -0.2287276 | 0.00173877 | -0.1951739 | 0.00776058 |
| -0.3647473 | 3.32E-07   | -0.2500808 | 0.00059666 | -0.3492687 | 1.10E-06   |
| -0.1651016 | 0.02471428 | -0.0686517 | 0.35313199 | -0.3434887 | 1.70E-06   |
| -0.1064399 | 0.14929511 | -0.1883334 | 0.01025043 | -0.2899055 | 6.26E-05   |
| -0.1718876 | 0.01930868 | -0.208253  | 0.00444666 | 0.16247725 | 0.02712914 |
| -0.3852714 | 6.12E-08   | -0.299013  | 3.56E-05   | -0.2586236 | 0.00037872 |
| -0.3063982 | 2.22E-05   | -0.1637316 | 0.02595086 | -0.3839577 | 6.84E-08   |
| -0.3473202 | 1.27E-06   | -0.1223546 | 0.09708313 | -0.3020123 | 2.94E-05   |
| -0.2393525 | 0.00103326 | 0.00755039 | 0.91875527 | -0.4227894 | 2.03E-09   |
| -0.1711476 | 0.01984351 | -0.1857519 | 0.01135935 | -0.3536227 | 7.91E-07   |

|            |            |            |            |            |            |
|------------|------------|------------|------------|------------|------------|
| -0.2832183 | 9.37E-05   | -0.0643098 | 0.38447545 | -0.0717568 | 0.33173011 |
| -0.3969863 | 2.21E-08   | -0.2525286 | 0.00052462 | -0.1309918 | 0.07552361 |
| -0.4724512 | 1.12E-11   | -0.3116811 | 1.57E-05   | -0.4283748 | 1.18E-09   |
| -0.2718405 | 0.00018176 | -0.0832105 | 0.26013661 | -0.1572127 | 0.03258674 |
| -0.2908534 | 5.91E-05   | 0.04798677 | 0.5165707  | -0.1193838 | 0.10553704 |
| -0.5472808 | 7.59E-16   | -0.3675436 | 2.65E-07   | -0.3344816 | 3.27E-06   |
| 0.29141974 | 5.71E-05   | 0.07278582 | 0.32482512 | 0.01779083 | 0.81005092 |
| -0.280404  | 0.00011068 | -0.1644646 | 0.02528281 | -0.1787918 | 0.0148917  |
| -0.3077886 | 2.03E-05   | -0.1392259 | 0.05875035 | -0.0879857 | 0.23367933 |
| 0.23555235 | 0.00124797 | -0.050463  | 0.49514217 | 0.371191   | 1.98E-07   |
| -0.6037227 | 9.37E-20   | -0.3546423 | 7.31E-07   | -0.2457442 | 0.00074711 |
| 0.67955891 | 2.07E-26   | 0.34432347 | 1.59E-06   | 0.13611397 | 0.06468784 |
| -0.2202831 | 0.00258708 | -0.08953   | 0.22554245 | -0.2137162 | 0.00348936 |
| -0.3979313 | 2.03E-08   | -0.2206049 | 0.00254887 | -0.2407806 | 0.00096175 |
| -0.2731061 | 0.00016908 | -0.2211731 | 0.00248265 | -0.1714815 | 0.01960061 |
| -0.2781033 | 0.00012666 | -0.0031868 | 0.96566068 | -0.2434835 | 0.00083871 |
| -0.3797595 | 9.75E-08   | -0.2081324 | 0.00447023 | -0.3352437 | 3.09E-06   |
| -0.43071   | 9.38E-10   | -0.3986569 | 1.91E-08   | 0.03467565 | 0.63936694 |
| -0.342849  | 1.78E-06   | -0.3464101 | 1.36E-06   | -0.305989  | 2.28E-05   |
| -0.2953305 | 4.48E-05   | -0.2286306 | 0.00174687 | -0.2452126 | 0.00076778 |
| -0.3127786 | 1.46E-05   | -0.0741492 | 0.31582025 | -0.2297468 | 0.00165574 |
| -0.3284143 | 5.02E-06   | -0.1559097 | 0.03407317 | -0.2557371 | 0.00044236 |
| -0.2295379 | 0.00167246 | -0.0708883 | 0.33763096 | -0.3018399 | 2.97E-05   |
| -0.3002462 | 3.29E-05   | -0.1380178 | 0.06099965 | -0.5247157 | 1.77E-14   |
| 0.30045306 | 3.25E-05   | 0.32341222 | 7.11E-06   | 0.16565942 | 0.02422554 |
| -0.3708595 | 2.03E-07   | -0.1509828 | 0.04022375 | -0.4084872 | 7.83E-09   |
| -0.4432481 | 2.64E-10   | -0.3136462 | 1.38E-05   | -0.4714315 | 1.26E-11   |
| -0.2660566 | 0.00025179 | -0.1981793 | 0.00684825 | -0.3573589 | 5.93E-07   |
| -0.4090871 | 7.41E-09   | -0.2068797 | 0.00472174 | -0.2426377 | 0.00087557 |
| -0.2982906 | 3.72E-05   | -0.1747054 | 0.01738486 | -0.3670417 | 2.76E-07   |
| -0.2351863 | 0.00127068 | -0.1068005 | 0.14791387 | -0.203295  | 0.00551318 |
| -0.1778798 | 0.0154193  | -0.2276418 | 0.00183139 | -0.3053832 | 2.37E-05   |
| -0.3392744 | 2.31E-06   | 0.01672465 | 0.82123736 | -0.1442636 | 0.05009428 |
| -0.4702998 | 1.43E-11   | -0.3424177 | 1.83E-06   | -0.284512  | 8.67E-05   |
| -0.3159195 | 1.18E-05   | -0.1776116 | 0.0155775  | -0.2497244 | 0.00060788 |
| -0.3434828 | 1.70E-06   | -0.2087836 | 0.0043443  | -0.0717257 | 0.33194014 |
| -0.3545002 | 7.39E-07   | -0.298677  | 3.63E-05   | -0.2426139 | 0.00087662 |
| 0.31866542 | 9.84E-06   | 0.06994336 | 0.34412629 | 0.17078627 | 0.02010926 |
| -0.3603065 | 4.71E-07   | -0.1885894 | 0.01014588 | -0.0179336 | 0.80855613 |
| -0.1997088 | 0.00642172 | -0.3494634 | 1.08E-06   | -0.2709685 | 0.000191   |
| -0.3830367 | 7.40E-08   | -0.2171381 | 0.00298883 | -0.2368278 | 0.00117173 |
| -0.2689074 | 0.00021462 | -0.1223984 | 0.09696253 | -0.2611151 | 0.00033073 |
| -0.4459868 | 1.99E-10   | -0.1316018 | 0.07416081 | -0.2089728 | 0.00430832 |
| -0.2384924 | 0.00107866 | -0.163769  | 0.02591639 | -0.2677153 | 0.0002295  |
| -0.1799826 | 0.01422665 | -0.1690542 | 0.02142648 | -0.272102  | 0.00017907 |
| -0.2830216 | 9.48E-05   | -0.1143993 | 0.12101029 | -0.2100991 | 0.00409958 |

|            |            |            |            |            |            |
|------------|------------|------------|------------|------------|------------|
| -0.1855549 | 0.01144819 | 0.01598042 | 0.82906738 | -0.1097571 | 0.13695225 |
| -0.5385851 | 2.63E-15   | -0.3108085 | 1.66E-05   | -0.1290998 | 0.07988011 |
| -0.2346679 | 0.00130348 | -0.2868355 | 7.54E-05   | 0.21140251 | 0.00386942 |
| -0.4265907 | 1.41E-09   | -0.3340577 | 3.37E-06   | -0.2234591 | 0.00223169 |
| -0.3394509 | 2.28E-06   | -0.1834204 | 0.01245031 | -0.4381124 | 4.47E-10   |
| -0.3385051 | 2.44E-06   | -0.1939171 | 0.00817308 | -0.2375516 | 0.00113039 |
| 0.25407898 | 0.00048325 | 0.18210225 | 0.01310697 | 0.17295916 | 0.01855635 |
| -0.269316  | 0.00020973 | -0.15318   | 0.03737414 | -0.1827708 | 0.01277021 |
| -0.2085792 | 0.00438348 | -0.0371625 | 0.61551869 | -0.0846634 | 0.25187788 |
| -0.2774926 | 0.00013125 | -0.1021108 | 0.16664622 | -0.0719396 | 0.33049688 |
| -0.3884889 | 4.65E-08   | -0.1729208 | 0.01858283 | 0.01761386 | 0.81190505 |
| -0.430222  | 9.84E-10   | -0.2600465 | 0.00035057 | -0.0144426 | 0.84529989 |
| -0.1433491 | 0.05158172 | -0.0780644 | 0.29087374 | -0.2405063 | 0.00097513 |
| -0.2827615 | 9.63E-05   | -0.0701374 | 0.3427863  | -0.2457578 | 0.00074658 |
| -0.2780392 | 0.00012713 | -0.2258557 | 0.00199355 | -0.1236518 | 0.09356421 |
| -0.4381715 | 4.44E-10   | -0.1651713 | 0.02465278 | -0.3010881 | 3.12E-05   |
| -0.1762544 | 0.01640005 | -0.0439702 | 0.55231582 | -0.2185801 | 0.00279809 |
| -0.4017184 | 1.45E-08   | -0.1525625 | 0.0381573  | -0.2260312 | 0.00197706 |
| -0.3883438 | 4.70E-08   | -0.1350564 | 0.06681412 | -0.1212974 | 0.10002759 |
| -0.3513062 | 9.43E-07   | -0.1655964 | 0.02428038 | -0.2739738 | 0.00016088 |
| -0.2451244 | 0.00077126 | -0.1101552 | 0.13552508 | -0.122484  | 0.09672739 |
| -0.4270984 | 1.34E-09   | -0.2431826 | 0.00085166 | -0.0970439 | 0.18881367 |
| -0.3779927 | 1.13E-07   | -0.2306214 | 0.00158739 | -0.0629299 | 0.39477923 |
| -0.1525776 | 0.03813799 | -0.0873676 | 0.2369931  | -0.2480703 | 0.00066254 |
| 0.32514656 | 6.31E-06   | 0.03843712 | 0.60344707 | 0.02553705 | 0.7300617  |
| -0.4869206 | 2.10E-12   | -0.2068461 | 0.00472866 | -0.2533849 | 0.00050139 |
| 0.31080698 | 1.66E-05   | 0.23433365 | 0.00132504 | 0.24768482 | 0.00067592 |
| -0.3148253 | 1.27E-05   | -0.1612805 | 0.02829572 | -0.2202449 | 0.00259165 |
| -0.1470418 | 0.04579268 | -0.253442  | 0.00049987 | -0.2972296 | 3.98E-05   |
| -0.4758319 | 7.65E-12   | -0.3236951 | 6.97E-06   | -0.3038368 | 2.62E-05   |
| -0.3279755 | 5.18E-06   | -0.15467   | 0.0355404  | -0.1877816 | 0.01047908 |
| -0.4473719 | 1.72E-10   | -0.1884008 | 0.01022282 | -0.0510431 | 0.49019026 |
| -0.4686585 | 1.72E-11   | -0.1679348 | 0.02231693 | -0.2801133 | 0.00011259 |
| -0.4671423 | 2.04E-11   | -0.3564684 | 6.35E-07   | -0.0369995 | 0.61706994 |
| -0.3389959 | 2.36E-06   | -0.1778322 | 0.01544724 | -0.2964313 | 4.18E-05   |
| -0.269387  | 0.00020889 | -0.1311356 | 0.0752006  | -0.2044625 | 0.00524326 |
| -0.381452  | 8.46E-08   | -0.2409344 | 0.00095433 | -0.3457304 | 1.44E-06   |
| -0.4096223 | 7.05E-09   | -0.1760521 | 0.01652585 | -0.0330432 | 0.65522712 |
| -0.290526  | 6.03E-05   | -0.1965715 | 0.00732369 | -0.1758523 | 0.01665089 |
| 0.41335834 | 4.98E-09   | 0.11049525 | 0.13431518 | 0.15272365 | 0.03795156 |
| -0.393125  | 3.11E-08   | -0.2682717 | 0.00022244 | -0.2543071 | 0.00047743 |
| -0.4149614 | 4.29E-09   | -0.2650836 | 0.00026579 | -0.3672286 | 2.72E-07   |
| -0.3766966 | 1.26E-07   | -0.1751455 | 0.01709995 | -0.2389054 | 0.00105664 |
| -0.4286221 | 1.15E-09   | -0.3192888 | 9.43E-06   | -0.4420495 | 2.99E-10   |
| -0.2870389 | 7.45E-05   | -0.2221869 | 0.00236836 | -0.3463253 | 1.37E-06   |
| 0.05405754 | 0.46489333 | -0.169765  | 0.02087722 | -0.0993449 | 0.17849322 |

|            |            |            |            |            |            |
|------------|------------|------------|------------|------------|------------|
| 0.65982446 | 1.71E-24   | 0.41758762 | 3.34E-09   | 0.19230816 | 0.00872951 |
| -0.2879118 | 7.07E-05   | -0.3464739 | 1.36E-06   | 0.18071702 | 0.01382957 |
| -0.2164168 | 0.00308858 | -0.242975  | 0.0008607  | -0.1151977 | 0.11841985 |
| 0.23903446 | 0.00104984 | 0.05767376 | 0.43552015 | 0.15081813 | 0.04044443 |
| -0.3256731 | 6.08E-06   | -0.2136183 | 0.00350472 | -0.2844984 | 8.68E-05   |
| -0.4579021 | 5.63E-11   | -0.2674037 | 0.00023354 | -0.2444096 | 0.00080001 |
| -0.1691571 | 0.0213462  | -0.1963654 | 0.0073867  | -0.2355536 | 0.0012479  |
| -0.3876668 | 4.99E-08   | -0.2036684 | 0.00542553 | -0.0588739 | 0.42601203 |
| -0.2516013 | 0.00055091 | -0.1709687 | 0.01997468 | -0.4277995 | 1.25E-09   |
| -0.3616751 | 4.23E-07   | -0.3732691 | 1.67E-07   | -0.4039812 | 1.18E-08   |
| -0.3874265 | 5.09E-08   | -0.314047  | 1.34E-05   | -0.3629112 | 3.84E-07   |
| -0.3165912 | 1.13E-05   | -0.1999766 | 0.00634952 | -0.2604451 | 0.00034305 |
| -0.2514528 | 0.00055523 | -0.0761446 | 0.30293735 | -0.3405453 | 2.11E-06   |
| -0.5607812 | 1.03E-16   | -0.322456  | 7.59E-06   | -0.2651457 | 0.00026488 |
| -0.4151138 | 4.22E-09   | -0.0096854 | 0.89589766 | -0.3939804 | 2.88E-08   |
| 0.38225981 | 7.90E-08   | 0.20117054 | 0.00603639 | 0.18728663 | 0.01068803 |
| -0.2703559 | 0.00019776 | -0.1372512 | 0.06246351 | -0.0702373 | 0.34209699 |
| -0.0234122 | 0.75175587 | -0.1599174 | 0.0296764  | -0.2156206 | 0.00320217 |
| -0.327766  | 5.26E-06   | -0.2654696 | 0.00026015 | -0.2627806 | 0.00030186 |
| -0.3056602 | 2.33E-05   | -0.0744472 | 0.31387419 | -0.2245337 | 0.00212189 |
| -0.5401882 | 2.09E-15   | -0.1450283 | 0.04887803 | -0.2685831 | 0.00021858 |
| -0.1936195 | 0.00827358 | -0.0339924 | 0.64598638 | 0.13246684 | 0.07226239 |
| -0.2940756 | 4.85E-05   | -0.1443111 | 0.05001791 | -0.3699822 | 2.18E-07   |
| -0.2573929 | 0.00040474 | -0.0220703 | 0.76555826 | -0.1067611 | 0.1480643  |
| -0.472444  | 1.12E-11   | -0.1159761 | 0.11593588 | -0.1560763 | 0.03387994 |
| -0.2845848 | 8.64E-05   | -0.2578361 | 0.00039518 | -0.2353768 | 0.00125882 |
| -0.0536366 | 0.46838235 | -0.0324036 | 0.66148422 | -0.2756245 | 0.00014628 |
| -0.3845147 | 6.53E-08   | -0.2616879 | 0.00032052 | -0.2546298 | 0.00046929 |
| -0.3960946 | 2.39E-08   | -0.2098815 | 0.00413918 | -0.3144264 | 1.31E-05   |
| -0.4730544 | 1.05E-11   | -0.2850499 | 8.40E-05   | -0.1643697 | 0.02536849 |
| -0.294902  | 4.60E-05   | -0.1546928 | 0.03551293 | -0.3834217 | 7.16E-08   |
| -0.2283906 | 0.00176704 | -0.1010494 | 0.1711211  | -0.0942034 | 0.20214689 |
| 0.44854991 | 1.52E-10   | 0.23899805 | 0.00105175 | 0.19150138 | 0.00902096 |
| -0.1685168 | 0.02185006 | -0.0959569 | 0.19383801 | -0.2150858 | 0.00328058 |
| -0.4071186 | 8.87E-09   | -0.1053728 | 0.1534394  | -0.2850634 | 8.39E-05   |
| -0.3246773 | 6.52E-06   | -0.1330017 | 0.07110845 | -0.1024531 | 0.16522145 |
| -0.1674541 | 0.02270897 | -0.3108461 | 1.66E-05   | 0.12486216 | 0.09037331 |
| -0.4264535 | 1.43E-09   | -0.1189258 | 0.10689025 | -0.1944908 | 0.00798242 |
| -0.5028008 | 3.03E-13   | -0.2568618 | 0.00041647 | -0.3653163 | 3.17E-07   |
| -0.2687547 | 0.00021647 | -0.1568639 | 0.03297914 | -0.1728456 | 0.01863486 |
| -0.1889141 | 0.01001458 | -0.0832702 | 0.25979377 | -0.122246  | 0.09738244 |
| -0.2860233 | 7.92E-05   | -0.2181048 | 0.00285971 | -0.0811724 | 0.2720325  |
| -0.34275   | 1.79E-06   | -0.3465812 | 1.35E-06   | -0.238821  | 0.0010611  |
| 0.36627748 | 2.94E-07   | 0.08346693 | 0.2586657  | 0.1699657  | 0.02072431 |
| -0.3610284 | 4.45E-07   | -0.2262686 | 0.00195495 | -0.0403749 | 0.58530064 |
| -0.2534955 | 0.00049845 | -0.1537867 | 0.03661805 | -0.233283  | 0.00139495 |

|            |            |            |            |            |            |
|------------|------------|------------|------------|------------|------------|
| -0.3151878 | 1.24E-05   | -0.0246767 | 0.7388204  | -0.2620344 | 0.00031449 |
| -0.3370794 | 2.71E-06   | -0.1326221 | 0.07192585 | 0.0001893  | 0.99795956 |
| 0.46483218 | 2.64E-11   | 0.10953296 | 0.13776094 | 0.16948363 | 0.02109317 |
| -0.3751132 | 1.43E-07   | -0.2600366 | 0.00035076 | -0.3234168 | 7.11E-06   |
| -0.1070776 | 0.14685901 | -0.1426268 | 0.05278227 | -0.3593782 | 5.07E-07   |
| -0.1382694 | 0.06052544 | -0.0630614 | 0.39379046 | -0.3234706 | 7.08E-06   |
| -0.2485002 | 0.00064792 | -0.1681246 | 0.02216372 | -0.297989  | 3.80E-05   |
| -0.3873938 | 5.10E-08   | -0.1381396 | 0.06076972 | -0.3045573 | 2.50E-05   |
| -0.4113928 | 5.98E-09   | -0.1723497 | 0.01898102 | -0.104746  | 0.15591364 |
| 0.34346161 | 1.70E-06   | 0.13538993 | 0.06613752 | 0.39332347 | 3.05E-08   |
| -0.3052447 | 2.39E-05   | -0.3070183 | 2.13E-05   | -0.3614019 | 4.32E-07   |
| -0.3074769 | 2.07E-05   | -0.1785825 | 0.01501137 | -0.1707503 | 0.02013588 |
| -0.273165  | 0.00016851 | -0.1363493 | 0.0642222  | -0.1845939 | 0.01189024 |
| -0.1175537 | 0.1110266  | -0.0607158 | 0.41165535 | -0.2979522 | 3.80E-05   |
| 0.45280037 | 9.72E-11   | 0.20447694 | 0.00524    | 0.12867695 | 0.08088092 |
| -0.3281501 | 5.12E-06   | -0.1310336 | 0.07542954 | -0.1417254 | 0.05431291 |
| -0.4040033 | 1.18E-08   | -0.2442341 | 0.00080721 | -0.1322355 | 0.07276629 |
| -0.2204568 | 0.0025664  | -0.1390444 | 0.05908387 | -0.1626606 | 0.02695413 |
| -0.1422806 | 0.05336586 | -0.1331996 | 0.0706853  | -0.1835708 | 0.01237728 |
| -0.3702044 | 2.14E-07   | -0.2545489 | 0.00047132 | -0.2386556 | 0.0010699  |
| -0.3175232 | 1.06E-05   | -0.1410198 | 0.05553642 | -0.205491  | 0.00501537 |
| 0.63018199 | 7.21E-22   | 0.38317954 | 7.31E-08   | 0.12810471 | 0.08225137 |
| -0.4122353 | 5.53E-09   | -0.2399629 | 0.00100212 | -0.1731636 | 0.01841574 |
| -0.2563352 | 0.00042841 | -0.0790413 | 0.28486001 | -0.1977506 | 0.00697227 |
| 0.37256476 | 1.77E-07   | 0.11281586 | 0.12627771 | 0.24140739 | 0.00093183 |
| -0.3144936 | 1.30E-05   | -0.1470641 | 0.04575953 | -0.3508341 | 9.78E-07   |
| -0.3974049 | 2.13E-08   | -0.1271959 | 0.08446621 | -0.22914   | 0.00170473 |
| -0.3848643 | 6.34E-08   | -0.2356331 | 0.00124302 | -0.0584892 | 0.42904648 |
| -0.2298246 | 0.00164956 | -0.086232  | 0.24316687 | 0.01651207 | 0.82347211 |
| -0.4173212 | 3.43E-09   | -0.1251935 | 0.08951516 | -0.2058215 | 0.00494405 |
| 0.27926622 | 0.00011833 | 0.07118741 | 0.33559115 | 0.31378615 | 1.37E-05   |
| -0.2740307 | 0.00016035 | -0.0995442 | 0.1776192  | -0.3226962 | 7.47E-06   |
| -0.1925788 | 0.00863363 | -0.2945548 | 4.70E-05   | -0.3418875 | 1.91E-06   |
| -0.5035361 | 2.76E-13   | -0.3066599 | 2.18E-05   | -0.3402449 | 2.15E-06   |
| -0.2099886 | 0.00411964 | -0.1796613 | 0.01440351 | -0.1929408 | 0.00850685 |
| -0.2337013 | 0.00136672 | -0.0420855 | 0.56949377 | -0.3254319 | 6.18E-06   |
| -0.2186444 | 0.00278985 | -0.0352744 | 0.6335899  | -0.3877841 | 4.94E-08   |
| -0.2787898 | 0.00012168 | -0.0297614 | 0.68757819 | -0.0150494 | 0.83888691 |
| -0.3425584 | 1.82E-06   | -0.2299297 | 0.00164123 | -0.2802817 | 0.00011148 |
| -0.4458162 | 2.03E-10   | -0.2309843 | 0.0015598  | -0.3326914 | 3.71E-06   |
| -0.3252745 | 6.25E-06   | -0.1371089 | 0.06273836 | -0.2104626 | 0.00403418 |
| -0.2055581 | 0.00500081 | -0.1941    | 0.00811189 | -0.255488  | 0.00044829 |
| -0.2611961 | 0.00032927 | -0.1617986 | 0.02778551 | -0.1618608 | 0.02772477 |
| -0.2168886 | 0.003023   | -0.2048549 | 0.00515524 | -0.2560822 | 0.00043426 |
| -0.2574083 | 0.0004044  | -0.2003577 | 0.00624804 | -0.1508055 | 0.04046145 |
| -0.4753485 | 8.08E-12   | -0.2688269 | 0.0002156  | -0.1535634 | 0.03689484 |

|            |            |            |            |            |            |
|------------|------------|------------|------------|------------|------------|
| -0.2906893 | 5.97E-05   | -0.1016422 | 0.16861067 | -0.2745927 | 0.00015525 |
| -0.4183358 | 3.11E-09   | -0.2140344 | 0.00343982 | -0.1704719 | 0.02034303 |
| -0.305324  | 2.38E-05   | -0.3085903 | 1.92E-05   | -0.3158093 | 1.19E-05   |
| -0.2692316 | 0.00021073 | -0.2871336 | 7.41E-05   | -0.2793983 | 0.00011742 |
| -0.1772686 | 0.01578192 | -0.1708543 | 0.02005897 | -0.3646471 | 3.34E-07   |
| -0.4535168 | 9.01E-11   | -0.2670463 | 0.00023826 | -0.3543478 | 7.48E-07   |
| 0.02068776 | 0.77985601 | -0.1710381 | 0.01992373 | -0.2793872 | 0.00011749 |
| -0.2892373 | 6.52E-05   | -0.1359873 | 0.0649395  | -0.0566929 | 0.44338068 |
| -0.4189505 | 2.94E-09   | -0.1770231 | 0.01592963 | -0.2146793 | 0.00334135 |
| -0.2769023 | 0.00013583 | -0.0206174 | 0.78058552 | -0.2849403 | 8.45E-05   |
| -0.2826345 | 9.70E-05   | -0.0706219 | 0.33945388 | -0.2985497 | 3.66E-05   |
| -0.3869921 | 5.28E-08   | -0.2377118 | 0.00112143 | -0.0830654 | 0.26097147 |
| -0.4454685 | 2.10E-10   | -0.3110905 | 1.63E-05   | -0.3006344 | 3.21E-05   |
| -0.4378335 | 4.60E-10   | -0.2169706 | 0.00301173 | -0.3497178 | 1.06E-06   |
| -0.006096  | 0.93436624 | 0.03772101 | 0.61021594 | -0.4549078 | 7.76E-11   |
| -0.2441176 | 0.00081203 | -0.2603988 | 0.00034391 | -0.3116236 | 1.58E-05   |
| -0.3736216 | 1.62E-07   | -0.2996226 | 3.42E-05   | -0.0530956 | 0.47288679 |
| 0.13293466 | 0.07125229 | 0.02719289 | 0.71330251 | 0.25724129 | 0.00040805 |
| -0.399615  | 1.75E-08   | -0.1574272 | 0.03234744 | -0.3789186 | 1.05E-07   |
| -0.2945558 | 4.70E-05   | -0.2131265 | 0.00358289 | -0.2669272 | 0.00023985 |
| -0.216562  | 0.00306826 | -0.1911867 | 0.00913694 | -0.2424805 | 0.00088257 |
| -0.4338784 | 6.84E-10   | -0.1475981 | 0.04496958 | -0.1869171 | 0.01084639 |
| -0.4467005 | 1.85E-10   | -0.3094795 | 1.81E-05   | -0.0541177 | 0.46439599 |
| 0.19838776 | 0.00678868 | 0.15168229 | 0.03929734 | 0.28392785 | 8.98E-05   |
| -0.2657981 | 0.00025544 | -0.2131817 | 0.00357403 | -0.2111425 | 0.00391438 |
| -0.3462543 | 1.38E-06   | -0.1892705 | 0.00987221 | -0.2522945 | 0.00053115 |
| -0.1786246 | 0.01498722 | -0.0582828 | 0.43067952 | -0.0880827 | 0.23316199 |
| -0.5550156 | 2.44E-16   | -0.1759359 | 0.01659845 | -0.0797977 | 0.28026113 |
| -0.386339  | 5.59E-08   | -0.1210375 | 0.10076239 | 0.00064687 | 0.99302755 |
| 0.59847965 | 2.33E-19   | 0.22201017 | 0.00238793 | 0.25447593 | 0.00047315 |
| -0.1682701 | 0.02204691 | 0.0430603  | 0.56057758 | -0.1246627 | 0.09089316 |
| -0.3168687 | 1.11E-05   | -0.250109  | 0.00059578 | -0.1912479 | 0.00911431 |
| -0.2110817 | 0.00392495 | -0.0726007 | 0.32606042 | -0.3802154 | 9.38E-08   |
| -0.4073756 | 8.67E-09   | 0.05371012 | 0.46777165 | -0.2480523 | 0.00066316 |
| -0.6034169 | 9.88E-20   | -0.356898  | 6.14E-07   | -0.2325264 | 0.00144736 |
| -0.3852882 | 6.11E-08   | -0.1469502 | 0.04592952 | -0.3054992 | 2.35E-05   |
| -0.3356164 | 3.01E-06   | -0.1659131 | 0.02400599 | -0.5198289 | 3.39E-14   |
| -0.3227941 | 7.42E-06   | 0.00163029 | 0.98242881 | 0.00958296 | 0.8969922  |
| -0.1837459 | 0.01229267 | -0.0437911 | 0.55393743 | -0.1718978 | 0.01930139 |
| -0.3781565 | 1.11E-07   | -0.2624047 | 0.00030817 | 0.02308408 | 0.75512342 |
| -0.4039659 | 1.18E-08   | -0.2858461 | 8.01E-05   | -0.0158368 | 0.83058002 |
| 0.26685901 | 0.00024076 | 0.15902832 | 0.03060763 | 0.34592776 | 1.41E-06   |
| -0.2250986 | 0.00206616 | -0.1977467 | 0.00697341 | -0.1894329 | 0.00980792 |
| -0.2811529 | 0.0001059  | -0.012175  | 0.86935211 | -0.2543712 | 0.0004758  |
| -0.3433614 | 1.71E-06   | -0.3548955 | 7.17E-07   | -0.1735675 | 0.01814071 |
| -0.2168592 | 0.00302704 | -0.0326973 | 0.65860857 | -0.1754417 | 0.01691046 |

|            |            |            |            |            |            |
|------------|------------|------------|------------|------------|------------|
| 0.19703336 | 0.0071842  | 0.08600329 | 0.24442375 | 0.33746664 | 2.63E-06   |
| 0.34242956 | 1.83E-06   | 0.12643056 | 0.08636827 | 0.08497952 | 0.25010516 |
| -0.4316266 | 8.56E-10   | -0.1895574 | 0.00975887 | -0.2525673 | 0.00052355 |
| -0.2191059 | 0.00273134 | -0.1200883 | 0.10348145 | -0.2633047 | 0.00029327 |
| -0.2471186 | 0.00069601 | -0.0062192 | 0.93304237 | -0.0812828 | 0.2713789  |
| -0.3227944 | 7.42E-06   | -0.2010559 | 0.00606584 | -0.2116608 | 0.00382522 |
| -0.1766114 | 0.01618009 | -0.1552143 | 0.03488969 | -0.3144596 | 1.31E-05   |
| -0.4867134 | 2.15E-12   | -0.207817  | 0.00453241 | -0.257624  | 0.00039973 |
| -0.4739802 | 9.45E-12   | -0.2290202 | 0.00171456 | -0.1341835 | 0.06861201 |
| -0.31183   | 1.55E-05   | -0.1668247 | 0.02323128 | -0.0881054 | 0.23304148 |
| -0.060193  | 0.41570112 | 0.06763323 | 0.36033639 | -0.2267822 | 0.00190787 |
| 0.41848169 | 3.07E-09   | 0.21058159 | 0.00401298 | 0.17107444 | 0.01989706 |
| -0.3927214 | 3.22E-08   | -0.2198321 | 0.00264151 | -0.2320829 | 0.00147891 |
| -0.108622  | 0.14108466 | -0.0677996 | 0.35915364 | -0.3014632 | 3.05E-05   |
| 0.25615862 | 0.00043248 | -0.0284501 | 0.70066836 | 0.20903237 | 0.00429703 |
| -0.4364047 | 5.31E-10   | -0.2090639 | 0.00429109 | -0.3521331 | 8.86E-07   |
| -0.2181759 | 0.00285042 | -0.099068  | 0.17971247 | -0.3294203 | 4.68E-06   |
| 0.50775846 | 1.62E-13   | 0.29343007 | 5.04E-05   | 0.3332894  | 3.56E-06   |
| 0.35587138 | 6.65E-07   | 0.1454363  | 0.04823922 | 0.13352151 | 0.07000143 |
| -0.3483706 | 1.18E-06   | -0.1310924 | 0.07529748 | -0.1621489 | 0.02744503 |
| -0.1867979 | 0.01089792 | -0.3054583 | 2.36E-05   | -0.2363952 | 0.0011971  |
| 0.26805827 | 0.00022512 | 0.14375568 | 0.0509159  | 0.29708917 | 4.02E-05   |
| 0.28080891 | 0.00010807 | 0.01541669 | 0.83500975 | 0.12897696 | 0.08016981 |
| 0.62647033 | 1.47E-21   | 0.27294271 | 0.00017067 | 0.24738992 | 0.00068632 |
| -0.3320901 | 3.87E-06   | -0.191046  | 0.00918923 | -0.255955  | 0.00043723 |
| -0.1446986 | 0.04939934 | 0.05849104 | 0.42903191 | -0.1656829 | 0.02420518 |
| -0.3022421 | 2.90E-05   | -0.2598399 | 0.00035454 | -0.4023957 | 1.36E-08   |
| -0.4128238 | 5.24E-09   | -0.2390032 | 0.00105148 | -0.0908109 | 0.21894746 |
| -0.3887318 | 4.55E-08   | -0.2500461 | 0.00059774 | -0.0509755 | 0.49076633 |
| 0.69580661 | 4.18E-28   | 0.2965454  | 4.15E-05   | 0.14195064 | 0.05392698 |
| -0.1955377 | 0.00764469 | -0.03509   | 0.63536636 | -0.1021566 | 0.16645513 |
| -0.1663311 | 0.02364805 | -0.2630706 | 0.00029708 | -0.2084048 | 0.00441715 |
| -0.3979569 | 2.03E-08   | -0.2653111 | 0.00026245 | -0.2730991 | 0.00016915 |
| -0.3193852 | 9.37E-06   | -0.2776447 | 0.00013009 | -0.4263227 | 1.44E-09   |
| -0.2644999 | 0.00027453 | -0.1238674 | 0.0929894  | -0.0025352 | 0.97267859 |
| -0.3013233 | 3.07E-05   | -0.1309703 | 0.0755721  | -0.091866  | 0.2136189  |
| -0.271652  | 0.00018372 | -0.1205199 | 0.10223791 | -0.2968627 | 4.07E-05   |
| -0.2679416 | 0.0002266  | -0.0946455 | 0.20002839 | -0.0486038 | 0.5111869  |
| -0.2797453 | 0.00011505 | -0.2727643 | 0.00017242 | -0.2561606 | 0.00043244 |
| -0.4469898 | 1.79E-10   | -0.2111823 | 0.00390746 | -0.167766  | 0.0224539  |
| -0.4105122 | 6.49E-09   | -0.2080889 | 0.00447876 | -0.0163321 | 0.82536548 |
| -0.1959833 | 0.00750481 | 0.02211667 | 0.76507978 | 0.01808209 | 0.80700159 |
| -0.2309652 | 0.00156124 | -0.1343269 | 0.06831386 | -0.2554071 | 0.00045023 |
| -0.4290989 | 1.10E-09   | -0.1609893 | 0.02858602 | -0.2239629 | 0.00217959 |
| -0.4318173 | 8.40E-10   | -0.1246134 | 0.09102193 | -0.2805428 | 0.00010978 |
| -0.316589  | 1.13E-05   | -0.0448747 | 0.5441623  | -0.344959  | 1.52E-06   |



|            |            |            |            |            |            |
|------------|------------|------------|------------|------------|------------|
| -0.3906138 | 3.87E-08   | -0.1420022 | 0.05383891 | -0.1534067 | 0.0370901  |
| -0.2265479 | 0.00192922 | -0.1537526 | 0.03666015 | -0.2356945 | 0.00123926 |
| -0.1636421 | 0.02603348 | -0.2146153 | 0.00335099 | -0.237652  | 0.00112476 |
| 0.46123925 | 3.91E-11   | 0.90565335 | 4.21E-70   | -0.0641887 | 0.38537339 |
| 0.57743217 | 7.69E-18   | 0.95496766 | 1.69E-98   | 0.02374458 | 0.74834869 |
| 0.77190227 | 7.61E-38   | 0.79082946 | 7.09E-41   | -0.0647549 | 0.38118695 |
| 0.60170672 | 1.33E-19   | 0.93964547 | 3.62E-87   | -0.0215739 | 0.77068318 |
| 0.58709484 | 1.59E-18   | 0.97531996 | 5.39E-122  | 0.03475884 | 0.63856299 |
| 0.88761693 | 1.61E-63   | 0.70009399 | 1.43E-28   | 0.0416728  | 0.57328894 |
| 0.55914029 | 1.32E-16   | 0.94245049 | 5.29E-89   | 0.00262748 | 0.97168469 |
| 0.56252099 | 7.90E-17   | 0.93887543 | 1.11E-86   | 0.04769053 | 0.51916587 |
| 0.81386156 | 5.14E-45   | 0.89282112 | 2.69E-65   | -0.0412593 | 0.57710285 |
| 0.62498697 | 1.94E-21   | 0.93137701 | 3.12E-82   | 0.07209837 | 0.3294278  |
| 0.58104242 | 4.30E-18   | 0.95001757 | 1.87E-94   | -0.0135666 | 0.85457516 |
| 0.5513186  | 4.22E-16   | 0.96314723 | 2.65E-106  | 0.02478518 | 0.73771448 |
| 0.50026344 | 4.15E-13   | 0.94597215 | 1.93E-91   | 0.01614669 | 0.8273166  |
| 0.53644499 | 3.54E-15   | 0.9646869  | 5.73E-108  | -0.0185501 | 0.80210762 |
| 0.74032678 | 2.17E-33   | 0.88969429 | 3.22E-64   | -0.0883849 | 0.23155635 |
| 0.68900681 | 2.21E-27   | 0.91703535 | 5.58E-75   | 0.00739517 | 0.9204199  |
| 0.46034854 | 4.31E-11   | 0.53251212 | 6.12E-15   | 0.28194954 | 0.00010103 |
| 0.53442441 | 4.70E-15   | 0.96773608 | 1.70E-111  | -0.0429113 | 0.5619362  |
| 0.61151562 | 2.34E-20   | 0.97276662 | 3.92E-118  | 0.00965912 | 0.89617809 |
| 0.89065278 | 1.52E-64   | 0.83558527 | 1.74E-49   | 0.04051401 | 0.58400772 |
| 0.68968863 | 1.87E-27   | 0.95410225 | 9.24E-98   | 0.07476069 | 0.3118349  |
| 0.8368286  | 9.24E-50   | 0.90435453 | 1.38E-69   | 0.06025846 | 0.41519294 |
| 0.61138212 | 2.40E-20   | 0.97251435 | 9.01E-118  | 0.03327165 | 0.65299848 |
| 0.8514966  | 3.40E-53   | 0.83153382 | 1.33E-48   | 0.08555022 | 0.24692685 |
| 0.50927635 | 1.34E-13   | 0.87844168 | 1.37E-60   | -0.0039017 | 0.95796347 |
| 0.73528516 | 9.74E-33   | 0.64722277 | 2.43E-23   | -0.1558238 | 0.03417316 |
| 0.61968008 | 5.26E-21   | 0.97817025 | 8.14E-127  | 0.01666693 | 0.82184399 |
| 0.56221203 | 8.28E-17   | 0.97456314 | 8.25E-121  | -0.0087084 | 0.90634809 |
| 0.71180541 | 6.88E-30   | 0.93894252 | 1.01E-86   | 0.01021307 | 0.89026026 |
| 0.4733044  | 1.02E-11   | 0.92154748 | 4.13E-77   | -0.0209516 | 0.77712117 |
| 0.48871201 | 1.69E-12   | 0.90090199 | 3.02E-68   | -0.0439507 | 0.55249264 |
| 0.44528082 | 2.14E-10   | 0.93427048 | 6.93E-84   | -0.0266388 | 0.7188954  |
| 0.60258885 | 1.14E-19   | 0.96512121 | 1.88E-108  | 0.0121907  | 0.86918503 |
| 0.55956794 | 1.24E-16   | 0.93595093 | 7.00E-85   | 0.07394541 | 0.31715589 |
| 0.5333719  | 5.43E-15   | 0.93493236 | 2.83E-84   | -0.0343296 | 0.64271617 |
| 0.64735248 | 2.36E-23   | 0.95682926 | 3.85E-100  | 0.03462064 | 0.63989879 |
| 0.69261315 | 9.19E-28   | 0.94688713 | 4.21E-92   | 0.05293021 | 0.47426869 |
| 0.64354242 | 5.14E-23   | 0.97041626 | 6.86E-115  | 0.02826162 | 0.70255741 |
| 0.62297009 | 2.84E-21   | 0.95420788 | 7.52E-98   | -0.011173  | 0.88001994 |
| 0.59298718 | 5.95E-19   | 0.97682647 | 1.81E-124  | 0.00478684 | 0.94843905 |
| 0.52178809 | 2.61E-14   | 0.96216787 | 2.79E-105  | -0.01601   | 0.82875635 |
| 0.89051184 | 1.69E-64   | 0.78142577 | 2.48E-39   | 0.05792772 | 0.43349798 |
| 0.59726134 | 2.87E-19   | 0.98251329 | 1.52E-135  | 0.01354482 | 0.85480652 |

|            |          |            |           |            |            |
|------------|----------|------------|-----------|------------|------------|
| 0.61424113 | 1.43E-20 | 0.95475561 | 2.57E-98  | 0.01804383 | 0.80740194 |
| 0.64038102 | 9.71E-23 | 0.97584197 | 7.80E-123 | 0.0441921  | 0.55031018 |
| 0.82985184 | 3.03E-48 | 0.8463891  | 5.86E-52  | 0.16812233 | 0.02216555 |
| 0.58681116 | 1.67E-18 | 0.94444294 | 2.31E-90  | 0.02893561 | 0.69581114 |
| 0.59071808 | 8.72E-19 | 0.9521358  | 3.92E-96  | 0.04172541 | 0.57280447 |
| 0.62278586 | 2.94E-21 | 0.93494449 | 2.78E-84  | -0.0154598 | 0.83455476 |
| 0.76150668 | 2.66E-36 | 0.87700136 | 3.75E-60  | -0.0069927 | 0.92473797 |
| 0.60336323 | 9.97E-20 | 0.93908312 | 8.24E-87  | 0.035552   | 0.63091886 |
| 0.5810705  | 4.28E-18 | 0.9579763  | 3.46E-101 | 0.05113089 | 0.48944372 |
| 0.60391292 | 9.06E-20 | 0.94503846 | 8.85E-91  | 0.02346322 | 0.75123232 |
| 0.56051584 | 1.07E-16 | 0.90924946 | 1.42E-71  | -0.0724259 | 0.32722971 |
| 0.67102014 | 1.46E-25 | 0.92878407 | 8.24E-81  | 0.0223899  | 0.76226376 |
| 0.58696415 | 1.63E-18 | 0.95588473 | 2.67E-99  | 0.01665603 | 0.82195861 |
| 0.60946138 | 3.39E-20 | 0.92156046 | 4.07E-77  | -0.0149812 | 0.83960696 |
| 0.53147351 | 7.06E-15 | 0.92261902 | 1.23E-77  | 0.00305578 | 0.96707153 |
| 0.85643495 | 1.95E-54 | 0.71335471 | 4.56E-30  | -0.0042997 | 0.95368047 |
| 0.30832722 | 1.96E-05 | 0.86879694 | 9.34E-58  | -0.0711957 | 0.33553478 |
| 0.55979568 | 1.19E-16 | 0.94813922 | 5.02E-93  | 0.01047322 | 0.88748323 |
| 0.46052759 | 4.23E-11 | 0.94782186 | 8.65E-93  | -0.0253992 | 0.73146257 |
| 0.54171046 | 1.69E-15 | 0.95188886 | 6.21E-96  | 0.01214105 | 0.86971307 |
| 0.5990396  | 2.12E-19 | 0.96603631 | 1.72E-109 | 0.00488027 | 0.94743409 |
| 0.60917302 | 3.57E-20 | 0.97064993 | 3.36E-115 | 0.01369675 | 0.85319617 |
| 0.6042773  | 8.50E-20 | 0.96061955 | 1.02E-103 | 0.02599266 | 0.7254372  |
| 0.58499218 | 2.26E-18 | 0.97363901 | 2.07E-119 | 0.04839275 | 0.51302506 |
| 0.57578897 | 1.00E-17 | 0.97622558 | 1.83E-123 | 0.02011251 | 0.78582725 |
| 0.50229007 | 3.23E-13 | 0.94418827 | 3.47E-90  | -0.0247305 | 0.73827214 |
| 0.49208293 | 1.13E-12 | 0.94357887 | 9.10E-90  | 0.00706619 | 0.92394921 |
| 0.56853924 | 3.13E-17 | 0.9685369  | 1.77E-112 | 0.03259004 | 0.65965829 |
| 0.52404077 | 1.93E-14 | 0.94289593 | 2.65E-89  | -0.0380769 | 0.60684771 |
| 0.58545789 | 2.09E-18 | 0.96540994 | 8.92E-109 | 0.02248045 | 0.76133127 |
| 0.59729201 | 2.86E-19 | 0.97722962 | 3.70E-125 | -0.0085887 | 0.90762933 |
| 0.52947946 | 9.27E-15 | 0.95834741 | 1.56E-101 | 0.0058571  | 0.93693251 |
| 0.6034831  | 9.77E-20 | 0.96793159 | 9.82E-112 | 0.02802199 | 0.70496164 |
| 0.47615018 | 7.37E-12 | 0.94584864 | 2.36E-91  | -0.0092949 | 0.90007189 |
| 0.43328396 | 7.26E-10 | 0.93863742 | 1.57E-86  | 0.00543458 | 0.94147367 |
| 0.83845074 | 4.01E-50 | 0.71419735 | 3.64E-30  | 0.10971786 | 0.13709364 |
| 0.60536841 | 7.01E-20 | 0.97071724 | 2.73E-115 | 0.02363657 | 0.74945524 |
| 0.59590889 | 3.62E-19 | 0.96634307 | 7.62E-110 | -0.0081187 | 0.91266333 |
| 0.35417726 | 7.58E-07 | 0.65974113 | 1.75E-24  | -0.0925007 | 0.21045902 |
| 0.6510428  | 1.10E-23 | 0.93535341 | 1.59E-84  | 0.00250425 | 0.97301219 |
| 0.62827992 | 1.04E-21 | 0.9788684  | 4.29E-128 | 0.00928567 | 0.9001709  |
| 0.54204311 | 1.61E-15 | 0.93026144 | 1.30E-81  | -0.0628642 | 0.39527426 |
| 0.55701718 | 1.81E-16 | 0.94751646 | 1.46E-92  | 0.01252195 | 0.86566356 |
| 0.62645136 | 1.47E-21 | 0.96416912 | 2.12E-107 | 0.03213762 | 0.6640936  |
| 0.56006108 | 1.15E-16 | 0.95639155 | 9.51E-100 | 0.0338802  | 0.64707556 |
| 0.57450354 | 1.23E-17 | 0.97976388 | 8.50E-130 | 0.00720289 | 0.92248248 |

|            |          |            |           |            |            |
|------------|----------|------------|-----------|------------|------------|
| 0.55265638 | 3.46E-16 | 0.95976338 | 7.03E-103 | 0.0071365  | 0.92319478 |
| 0.6662132  | 4.26E-25 | 0.97832725 | 4.24E-127 | 0.01017261 | 0.8906923  |
| 0.6672811  | 3.36E-25 | 0.90402579 | 1.86E-69  | 0.09381886 | 0.20400307 |
| 0.5196777  | 3.46E-14 | 0.94952942 | 4.46E-94  | 0.01408834 | 0.84904838 |
| 0.58643063 | 1.78E-18 | 0.92542211 | 4.80E-79  | 0.00588402 | 0.93664322 |
| 0.53382791 | 5.10E-15 | 0.95733473 | 1.34E-100 | -0.019316  | 0.79411628 |
| 0.64068944 | 9.13E-23 | 0.94786332 | 8.06E-93  | 0.00130877 | 0.98589368 |
| 0.52048431 | 3.11E-14 | 0.95923711 | 2.26E-102 | -0.0155332 | 0.8337811  |
| 0.50847309 | 1.48E-13 | 0.94635581 | 1.02E-91  | -0.0287594 | 0.697573   |
| 0.59069221 | 8.75E-19 | 0.9723198  | 1.70E-117 | 0.02537913 | 0.73166687 |
| 0.46232635 | 3.47E-11 | 0.93894728 | 1.00E-86  | -0.0294096 | 0.69108121 |
| 0.52178606 | 2.61E-14 | 0.94778989 | 9.14E-93  | 0.04580087 | 0.53587562 |
| 0.51452971 | 6.79E-14 | 0.96630653 | 8.40E-110 | 0.0213059  | 0.77345381 |
| 0.51418181 | 7.10E-14 | 0.9547494  | 2.60E-98  | -0.0212114 | 0.77443187 |
| 0.67082814 | 1.52E-25 | 0.94348249 | 1.06E-89  | 0.01594051 | 0.82948778 |
| 0.57849695 | 6.48E-18 | 0.96441955 | 1.13E-107 | 0.01784305 | 0.80950394 |
| 0.61089387 | 2.62E-20 | 0.96823579 | 4.16E-112 | 0.03285626 | 0.65705384 |
| 0.61165746 | 2.28E-20 | 0.96852683 | 1.82E-112 | -0.0067043 | 0.92783376 |
| 0.85680776 | 1.57E-54 | 0.83335444 | 5.36E-49  | 0.16057141 | 0.02900696 |
| 0.57564463 | 1.02E-17 | 0.96667099 | 3.16E-110 | 0.0123087  | 0.86793036 |
| 0.58782258 | 1.41E-18 | 0.96171852 | 8.06E-105 | 0.02582104 | 0.72717801 |
| 0.55787332 | 1.59E-16 | 0.94740012 | 1.77E-92  | 0.01780315 | 0.80992189 |
| 0.57306933 | 1.54E-17 | 0.96070485 | 8.42E-104 | 0.0593558  | 0.42222784 |
| 0.60379635 | 9.25E-20 | 0.97100229 | 1.13E-115 | 0.00348572 | 0.96244177 |
| 0.56939507 | 2.74E-17 | 0.95618599 | 1.45E-99  | 0.04554311 | 0.53817555 |
| 0.62290787 | 2.88E-21 | 0.97391988 | 7.88E-120 | 0.04455467 | 0.54704054 |
| 0.62949926 | 8.22E-22 | 0.9485345  | 2.54E-93  | -0.0250729 | 0.73478309 |
| 0.57838141 | 6.61E-18 | 0.94680983 | 4.79E-92  | -0.0182793 | 0.80493881 |
| 0.87133465 | 1.77E-58 | 0.82911595 | 4.34E-48  | -0.0240733 | 0.74498369 |
| 0.77322727 | 4.77E-38 | 0.87832516 | 1.48E-60  | 0.07802634 | 0.2911098  |
| 0.56881366 | 3.00E-17 | 0.95176621 | 7.80E-96  | 0.01058367 | 0.88630455 |
| 0.59688547 | 3.06E-19 | 0.9725841  | 7.16E-118 | 0.00474653 | 0.94887258 |
| 0.59341094 | 5.54E-19 | 0.95743023 | 1.10E-100 | 0.04012335 | 0.58764214 |
| 0.45162912 | 1.10E-10 | 0.91934676 | 4.68E-76  | -0.0260848 | 0.72450338 |
| 0.53620243 | 3.67E-15 | 0.94737845 | 1.84E-92  | 0.0092093  | 0.90098772 |
| 0.56745422 | 3.70E-17 | 0.97261098 | 6.56E-118 | 0.00587806 | 0.93670722 |
| 0.58831682 | 1.30E-18 | 0.9743935  | 1.50E-120 | 0.04289528 | 0.56208227 |
| 0.64437043 | 4.35E-23 | 0.96841133 | 2.53E-112 | 0.04209659 | 0.56939208 |
| 0.61967012 | 5.27E-21 | 0.95970079 | 8.09E-103 | 0.04337966 | 0.55767118 |
| 0.60453852 | 8.11E-20 | 0.98059545 | 1.90E-131 | 0.02157009 | 0.77072217 |
| 0.36544794 | 3.14E-07 | 0.87060404 | 2.86E-58  | -0.0288535 | 0.69663181 |
| 0.57089583 | 2.17E-17 | 0.93564626 | 1.07E-84  | -0.0642262 | 0.3850951  |
| 0.59207512 | 6.94E-19 | 0.96926999 | 2.11E-113 | 0.01174423 | 0.87393548 |
| 0.52883436 | 1.01E-14 | 0.91361198 | 1.92E-73  | 0.02293529 | 0.75665215 |
| 0.57921625 | 5.77E-18 | 0.95881545 | 5.67E-102 | 0.03353862 | 0.65039737 |
| 0.57237907 | 1.72E-17 | 0.97641664 | 8.84E-124 | 0.05088672 | 0.4915228  |

|            |          |            |           |            |            |
|------------|----------|------------|-----------|------------|------------|
| 0.62704508 | 1.31E-21 | 0.95865509 | 8.04E-102 | 0.00771117 | 0.91703133 |
| 0.58162216 | 3.91E-18 | 0.95537055 | 7.54E-99  | -0.0555358 | 0.45275621 |
| 0.60731364 | 4.97E-20 | 0.9764366  | 8.19E-124 | 0.01856537 | 0.80194826 |
| 0.51156995 | 9.95E-14 | 0.9595466  | 1.14E-102 | -0.0273545 | 0.71167441 |
| 0.49472727 | 8.20E-13 | 0.95378366 | 1.72E-97  | -0.0306986 | 0.67827792 |
| 0.59162419 | 7.49E-19 | 0.93782574 | 5.04E-86  | -0.0106252 | 0.88586126 |
| 0.80204969 | 7.98E-43 | 0.82400528 | 5.01E-47  | -0.0355913 | 0.63054143 |
| 0.77535607 | 2.24E-38 | 0.84771256 | 2.83E-52  | 0.06478139 | 0.38099161 |
| 0.58473981 | 2.35E-18 | 0.97655578 | 5.18E-124 | 0.02016566 | 0.78527504 |
| 0.54383447 | 1.25E-15 | 0.93526699 | 1.79E-84  | -0.03173   | 0.66809987 |
| 0.56217601 | 8.33E-17 | 0.96148832 | 1.38E-104 | 0.06420302 | 0.38526687 |
| 0.64556004 | 3.41E-23 | 0.95863939 | 8.31E-102 | 0.00280004 | 0.96982597 |
| 0.57413093 | 1.30E-17 | 0.91075902 | 3.29E-72  | 0.0271582  | 0.71365219 |
| 0.53771658 | 2.97E-15 | 0.96067273 | 9.06E-104 | -0.0439646 | 0.55236667 |
| 0.59758597 | 2.72E-19 | 0.96544761 | 8.09E-109 | 0.03783431 | 0.60914276 |
| 0.57834613 | 6.64E-18 | 0.97685557 | 1.62E-124 | 0.02457225 | 0.73988652 |
| 0.61899762 | 5.97E-21 | 0.98004846 | 2.36E-130 | 0.01674659 | 0.82100682 |
| 0.52847322 | 1.06E-14 | 0.93877935 | 1.28E-86  | -0.0504429 | 0.49531411 |
| 0.50848726 | 1.48E-13 | 0.93925413 | 6.42E-87  | 0.00819732 | 0.91182116 |
| 0.57839822 | 6.59E-18 | 0.95747334 | 1.00E-100 | 0.03675452 | 0.61940414 |
| 0.60801809 | 4.38E-20 | 0.96359285 | 8.89E-107 | 0.06242747 | 0.39857216 |
| 0.58526772 | 2.16E-18 | 0.96255666 | 1.11E-105 | 0.05320751 | 0.47195304 |
| 0.60358424 | 9.60E-20 | 0.97391532 | 8.00E-120 | 0.0192411  | 0.79489651 |
| 0.60559145 | 6.74E-20 | 0.9738127  | 1.14E-119 | -0.001827  | 0.98030889 |
| 0.6521841  | 8.68E-24 | 0.96365017 | 7.72E-107 | 0.03703249 | 0.61675536 |
| 0.5775859  | 7.51E-18 | 0.94831339 | 3.72E-93  | 0.01960802 | 0.79107436 |
| 0.58500047 | 2.25E-18 | 0.970402   | 7.17E-115 | -0.0009696 | 0.98954951 |
| 0.47749623 | 6.32E-12 | 0.9319679  | 1.45E-82  | -0.0176719 | 0.81129644 |
| 0.85515929 | 4.13E-54 | 0.702578   | 7.60E-29  | 0.08254394 | 0.2639872  |
| 0.58419936 | 2.57E-18 | 0.95350727 | 2.92E-97  | 0.0326617  | 0.6589568  |
| 0.57941906 | 5.59E-18 | 0.96654392 | 4.45E-110 | 0.03732535 | 0.61397011 |
| 0.82085916 | 2.17E-46 | 0.82660385 | 1.46E-47  | 0.05614179 | 0.44783209 |
| 0.59053258 | 8.99E-19 | 0.97657746 | 4.76E-124 | 0.01047076 | 0.88750947 |
| 0.59345264 | 5.50E-19 | 0.97522203 | 7.70E-122 | 0.03898983 | 0.59824569 |
| 0.51948223 | 3.55E-14 | 0.96027226 | 2.25E-103 | 0.03854289 | 0.6024501  |
| 0.51541493 | 6.05E-14 | 0.50477068 | 2.36E-13  | 0.04850054 | 0.51208576 |
| 0.5738488  | 1.36E-17 | 0.96181444 | 6.44E-105 | 0.04207483 | 0.56959193 |
| 0.58393728 | 2.68E-18 | 0.95673617 | 4.67E-100 | 0.04382215 | 0.55365616 |
| 0.82348108 | 6.42E-47 | 0.89364412 | 1.38E-65  | 0.09645746 | 0.19151221 |
| 0.63119885 | 5.92E-22 | 0.97647213 | 7.15E-124 | 0.04506353 | 0.54246777 |
| 0.52926109 | 9.55E-15 | 0.92482539 | 9.68E-79  | 0.03850229 | 0.60283273 |
| 0.78594587 | 4.59E-40 | 0.85239434 | 2.04E-53  | 0.13393062 | 0.06914004 |
| 0.60541051 | 6.96E-20 | 0.96816172 | 5.13E-112 | 0.02660383 | 0.7192493  |
| 0.6156728  | 1.10E-20 | 0.95797174 | 3.49E-101 | -0.038198  | 0.60570397 |
| 0.76081869 | 3.34E-36 | 0.92922059 | 4.79E-81  | 0.01144799 | 0.87709001 |
| 0.64414022 | 4.55E-23 | 0.96096704 | 4.62E-104 | 0.01311603 | 0.85935463 |

|            |            |            |            |            |            |
|------------|------------|------------|------------|------------|------------|
| 0.54768176 | 7.17E-16   | 0.95717149 | 1.89E-100  | -0.0034777 | 0.96252853 |
| 0.62814007 | 1.07E-21   | 0.97869358 | 9.05E-128  | 0.01160542 | 0.87541342 |
| 0.54742673 | 7.44E-16   | 0.95925845 | 2.15E-102  | 0.03569732 | 0.62952259 |
| 0.60793289 | 4.45E-20   | 0.9710943  | 8.48E-116  | 0.01424887 | 0.84734914 |
| 0.57932644 | 5.67E-18   | 0.97470438 | 4.99E-121  | 0.0552607  | 0.45500111 |
| 0.87284552 | 6.44E-59   | 0.81041806 | 2.32E-44   | 0.01333064 | 0.85707769 |
| 0.59860114 | 2.28E-19   | 0.96007767 | 3.48E-103  | 0.02867723 | 0.69839462 |
| 0.5293025  | 9.50E-15   | 0.92999894 | 1.81E-81   | 0.00856382 | 0.90789572 |
| 0.66289028 | 8.83E-25   | 0.91411815 | 1.15E-73   | 0.00374369 | 0.95966438 |
| 0.65024357 | 1.30E-23   | 0.96279835 | 6.18E-106  | -0.0077079 | 0.91706656 |
| 0.57213532 | 1.78E-17   | 0.97164969 | 1.47E-116  | 0.0408947  | 0.58047619 |
| 0.22446015 | 0.00212925 | 0.18037728 | 0.01401204 | -0.2830814 | 9.45E-05   |
| -0.2980394 | 3.78E-05   | -0.1192396 | 0.10596168 | -0.3090216 | 1.87E-05   |
| -0.1761064 | 0.01649196 | -0.1757112 | 0.01673969 | -0.1742469 | 0.01768604 |
| -0.0922526 | 0.21169008 | -0.037094  | 0.61616984 | 0.00101151 | 0.98909744 |
| -0.0251594 | 0.73390277 | -0.0239137 | 0.7466167  | 0.26187188 | 0.00031731 |
| 0.20877841 | 0.00434529 | 0.15101955 | 0.04017458 | -0.1846579 | 0.01186034 |
| 0.02152177 | 0.77122164 | 0.0101659  | 0.89076399 | -0.077324  | 0.29548772 |
| -0.0349887 | 0.63634357 | -0.1014502 | 0.16942089 | -0.1703584 | 0.02042794 |
| -0.1871759 | 0.01073526 | -0.133838  | 0.06933439 | -0.2586895 | 0.00037737 |
| -0.0043414 | 0.95323132 | -0.0571285 | 0.4398801  | -0.1556635 | 0.03436037 |
| -0.0732275 | 0.3218898  | -0.0754271 | 0.30752918 | -0.2074961 | 0.00459644 |
| 0.11058672 | 0.13399114 | 0.02167838 | 0.76960335 | -0.0891449 | 0.22755229 |
| -0.1898831 | 0.00963166 | -0.1981893 | 0.00684538 | -0.086218  | 0.24324346 |
| -0.0296401 | 0.68878449 | -0.0141875 | 0.84799875 | -0.3004476 | 3.25E-05   |
| -0.0008495 | 0.99084325 | -0.0598492 | 0.41837428 | -0.1526136 | 0.03809193 |
| 0.00788101 | 0.91521074 | -0.0360959 | 0.62569992 | -0.194633  | 0.00793578 |
| 0.09237798 | 0.21106723 | -0.0154783 | 0.83435948 | -0.0061278 | 0.93402449 |
| -0.1131154 | 0.1252679  | -0.0716445 | 0.33248963 | -0.2994725 | 3.46E-05   |
| -0.202702  | 0.00565499 | -0.1073103 | 0.14597755 | -0.2185543 | 0.00280141 |
| 0.1296561  | 0.07857867 | 0.00555636 | 0.94016454 | -0.2411424 | 0.00094438 |
| -0.1076004 | 0.14488458 | -0.1668204 | 0.02323486 | -0.0798768 | 0.27978334 |
| -0.1447024 | 0.04939333 | -0.1653501 | 0.02449556 | -0.1698249 | 0.02083145 |
| 0.06159039 | 0.40493896 | 0.0619044  | 0.40254357 | -0.189538  | 0.00976652 |
| 0.00096787 | 0.98956774 | -0.0365876 | 0.62099726 | 0.12011284 | 0.10341053 |
| 0.14387293 | 0.05072524 | 0.07253438 | 0.32650375 | -0.0617768 | 0.40351626 |
| 0.17554072 | 0.01684757 | 0.03295978 | 0.65604226 | 0.04756682 | 0.52025157 |
| 0.05747522 | 0.43710473 | 0.02362353 | 0.74958889 | -0.111948  | 0.12923909 |
| -0.1003606 | 0.17407246 | -0.0327863 | 0.65773755 | -0.1992739 | 0.00654052 |
| 0.02486816 | 0.73686862 | -0.0475548 | 0.5203567  | -0.0884776 | 0.23106548 |
| -0.1662513 | 0.02371602 | -0.1730256 | 0.01851052 | -0.2816095 | 0.00010308 |
| -0.059564  | 0.42059916 | -0.0401655 | 0.58724954 | -0.1015572 | 0.16896904 |
| 0.1978531  | 0.00694244 | 0.08484797 | 0.25084182 | -0.2839606 | 8.96E-05   |
| 0.178544   | 0.01503347 | 0.01823463 | 0.80540569 | 0.22416505 | 0.002159   |
| 0.07111623 | 0.33607582 | -0.0256204 | 0.72921531 | 0.21535031 | 0.00324159 |
| -0.0759814 | 0.30397735 | -0.1037698 | 0.15982715 | -0.2330803 | 0.00140881 |

|            |            |            |            |            |            |
|------------|------------|------------|------------|------------|------------|
| -0.1229014 | 0.0955872  | -0.152124  | 0.03872174 | -0.0341325 | 0.64462663 |
| -0.0402398 | 0.58655771 | -0.0390996 | 0.59721515 | -0.1228035 | 0.09585365 |
| -0.1468495 | 0.04608013 | -0.0142402 | 0.84744123 | -0.2939485 | 4.88E-05   |
| -0.0315407 | 0.66996358 | -0.0187726 | 0.79978383 | -0.1778131 | 0.01545847 |
| -0.1229587 | 0.0954316  | -0.1235287 | 0.09389367 | -0.176911  | 0.0159975  |
| 0.08303664 | 0.26113725 | 0.05375585 | 0.46739224 | -0.0066314 | 0.92861583 |
| 0.00864246 | 0.90705373 | -0.1150207 | 0.11899021 | -0.228253  | 0.00177871 |
| -0.0332257 | 0.65344611 | -0.1359291 | 0.06505543 | -0.2617695 | 0.00031909 |
| -0.1598302 | 0.02976663 | -0.1253805 | 0.08903359 | -0.0938062 | 0.20406456 |
| 0.10494571 | 0.15512207 | 0.09458622 | 0.20031131 | -0.1558073 | 0.03419241 |
| -0.2070668 | 0.00468339 | -0.1933517 | 0.00836493 | -0.2354415 | 0.00125481 |
| 0.01459595 | 0.84367779 | 0.03043859 | 0.68085345 | -0.143328  | 0.05161648 |
| -0.0360296 | 0.62633521 | -0.0493144 | 0.50502294 | -0.2341206 | 0.00133895 |
| -0.0068115 | 0.92668208 | -0.0108286 | 0.88369195 | -0.3605993 | 4.60E-07   |
| -0.0672184 | 0.36329694 | -0.0666103 | 0.36766396 | -0.2276786 | 0.00182818 |
| -0.0138023 | 0.85207804 | -0.0272957 | 0.71226681 | 0.08272746 | 0.26292318 |
| -0.0762745 | 0.3021107  | -0.0609887 | 0.4095522  | -0.1514708 | 0.03957547 |
| -0.1890143 | 0.00997436 | -0.0807486 | 0.27455159 | -0.2290501 | 0.0017121  |
| -0.1979341 | 0.00691894 | -0.203237  | 0.00552689 | -0.3111453 | 1.63E-05   |
| -0.1999808 | 0.00634841 | -0.1345461 | 0.0678604  | -0.0743604 | 0.31443998 |
| 0.01947212 | 0.79248943 | 0.00066229 | 0.99286134 | 0.00794944 | 0.91447725 |
| 0.08474878 | 0.2513982  | -0.0054391 | 0.9414248  | -0.1604696 | 0.02911029 |
| -0.1121623 | 0.1285028  | -0.2043291 | 0.0052735  | -0.2358807 | 0.00122793 |
| -0.1540032 | 0.03635137 | -0.3275901 | 5.32E-06   | 0.06655203 | 0.36808379 |
| -0.0196154 | 0.79099753 | -0.0054109 | 0.9417284  | 0.36674526 | 2.83E-07   |
| -0.0328467 | 0.65714746 | -0.0691886 | 0.34937067 | 0.54467196 | 1.11E-15   |
| -0.2985818 | 3.66E-05   | -0.1218079 | 0.09859713 | -0.5337506 | 5.15E-15   |
| -0.0361469 | 0.62521079 | -0.0200471 | 0.78650684 | 0.71998544 | 7.55E-31   |
| 0.09464589 | 0.20002629 | 0.18233362 | 0.01298956 | 0.06781962 | 0.35901117 |
| -0.0018409 | 0.98015906 | 0.03554396 | 0.63099622 | 0.74252525 | 1.12E-33   |
| -0.2381956 | 0.00109474 | -0.158999  | 0.03063872 | -0.0335687 | 0.65010432 |
| 0.01391372 | 0.85089744 | 0.04918374 | 0.50615314 | -0.1045181 | 0.15682064 |
| -0.2100248 | 0.00411307 | -0.0955722 | 0.19563928 | -0.3117779 | 1.56E-05   |
| -0.1078391 | 0.14398988 | -0.1869676 | 0.01082464 | -0.2197332 | 0.00265358 |
| -0.1807754 | 0.01379845 | -0.1601726 | 0.02941368 | -0.3449091 | 1.53E-06   |
| -0.1178661 | 0.11007397 | -0.1911071 | 0.00916649 | -0.1715759 | 0.01953243 |
| -0.0267887 | 0.71738125 | -0.1152982 | 0.11809688 | -0.3421046 | 1.88E-06   |
| 0.27517338 | 0.00015014 | -0.0133035 | 0.85736595 | -0.151937  | 0.03896446 |
| 0.17279902 | 0.01866714 | 0.00991107 | 0.89348581 | -0.2210456 | 0.00249737 |
| -0.2051047 | 0.00509989 | -0.1598173 | 0.02978007 | -0.0944811 | 0.20081438 |
| 0.09081503 | 0.21892642 | -0.045473  | 0.53880223 | -0.1881613 | 0.01032129 |
| -0.1415616 | 0.05459493 | -0.1896614 | 0.00971812 | -0.304679  | 2.48E-05   |
| 0.11268855 | 0.12670879 | -0.0601157 | 0.41630085 | 0.02823235 | 0.70285098 |
| 0.11887087 | 0.10705351 | 0.0139625  | 0.85038088 | -0.1084162 | 0.1418442  |
| -0.1465419 | 0.04654313 | -0.0222568 | 0.7636356  | -0.2598502 | 0.00035434 |
| 0.068044   | 0.35741981 | -0.0189022 | 0.79843157 | -0.3090931 | 1.86E-05   |

|            |            |            |            |            |            |
|------------|------------|------------|------------|------------|------------|
| -0.1253126 | 0.08920824 | -0.0890219 | 0.22819702 | -0.1717036 | 0.01944043 |
| -0.1688929 | 0.02155286 | -0.2080027 | 0.00449571 | -0.2246516 | 0.00211015 |
| 0.15586185 | 0.03412883 | 0.08141199 | 0.27061507 | -0.3276384 | 5.30E-06   |
| 0.05145354 | 0.48670361 | 0.12275292 | 0.09599158 | 0.03411371 | 0.64480873 |
| -0.111168  | 0.13016423 | -0.1663555 | 0.02362733 | -0.3957937 | 2.46E-08   |
| 0.00990091 | 0.89359436 | 0.08481078 | 0.25105032 | -0.1514743 | 0.03957086 |
| 0.11237707 | 0.12776827 | -0.0177203 | 0.81079005 | -0.4115186 | 5.91E-09   |
| 0.20956315 | 0.00419774 | 0.11056976 | 0.13405118 | -0.1576791 | 0.03206823 |
| 0.09855335 | 0.18199538 | -0.0622834 | 0.39966357 | -0.2856855 | 8.08E-05   |
| 0.00259668 | 0.97201646 | -0.0511094 | 0.48962664 | -0.0791852 | 0.28398106 |
| -0.2151177 | 0.00327586 | -0.178533  | 0.01503982 | -0.262954  | 0.000299   |
| 0.02684591 | 0.71680334 | -0.0204913 | 0.78189413 | -0.2218535 | 0.0024054  |
| -0.0541022 | 0.46452378 | -0.1061426 | 0.15044114 | -0.3869979 | 5.28E-08   |
| -0.1391653 | 0.05886139 | -0.1475458 | 0.04504636 | -0.3053107 | 2.38E-05   |
| -0.136962  | 0.06302315 | -0.2356194 | 0.00124386 | -0.1560446 | 0.03391669 |
| -0.1393813 | 0.05846595 | -0.1366875 | 0.06355808 | -0.3455741 | 1.45E-06   |
| -0.2247343 | 0.00210194 | -0.1047652 | 0.15583766 | -0.2394959 | 0.00102587 |
| -0.2075492 | 0.00458579 | -0.1631717 | 0.02647122 | -0.2877546 | 7.14E-05   |
| 0.1232026  | 0.09477111 | -0.0033362 | 0.96405196 | -0.4367834 | 5.11E-10   |
| -0.112455  | 0.12750263 | -0.1498078 | 0.04182113 | -0.2608313 | 0.00033589 |
| 0.14911801 | 0.04278345 | -0.0004055 | 0.99562888 | 0.04445815 | 0.54791004 |
| -0.2373249 | 0.0011432  | -0.1422015 | 0.05349983 | -0.1107267 | 0.13349648 |
| 0.02058698 | 0.78090123 | -0.085206  | 0.24884043 | -0.2847348 | 8.56E-05   |
| 0.17057499 | 0.0202661  | -0.031196  | 0.67336186 | -0.0539574 | 0.4657217  |
| 0.05145958 | 0.4866524  | -0.0589284 | 0.42558283 | -0.2230656 | 0.00227318 |
| 0.08684497 | 0.23982062 | 0.02531895 | 0.73227885 | -0.1674657 | 0.02269944 |
| 0.2348283  | 0.00129325 | 0.00906526 | 0.90252864 | -0.1988458 | 0.00665939 |
| -0.0115819 | 0.87566388 | -0.0672778 | 0.36287203 | -0.3308118 | 4.24E-06   |
| 0.17497725 | 0.01720838 | 0.00629966 | 0.93217809 | -0.3129744 | 1.44E-05   |
| -0.0013177 | 0.98579746 | -0.0564593 | 0.44526473 | -0.4285387 | 1.16E-09   |
| -0.1931681 | 0.00842807 | -0.092993  | 0.20803084 | 0.13575049 | 0.06541231 |
| -0.2268725 | 0.0018997  | -0.2748377 | 0.00015307 | 0.39562601 | 2.49E-08   |
| -0.3274821 | 5.36E-06   | -0.3612314 | 4.38E-07   | 0.15955232 | 0.03005584 |
| 0.37245616 | 1.78E-07   | 0.1983487  | 0.00679981 | -0.474681  | 8.72E-12   |
| -0.2767339 | 0.00013717 | -0.1351252 | 0.06667422 | -0.1894856 | 0.00978714 |
| -0.2861429 | 7.87E-05   | -0.2172778 | 0.00296985 | -0.2965596 | 4.15E-05   |
| -0.0384961 | 0.602891   | 0.31022324 | 1.73E-05   | -0.2860628 | 7.90E-05   |
| -0.1596466 | 0.02995744 | -0.0424672 | 0.56599485 | -0.3876718 | 4.98E-08   |
| 0.31764147 | 1.05E-05   | 0.06960512 | 0.3464704  | 0.19786567 | 0.00693879 |
| -0.1055573 | 0.15271668 | -0.0831891 | 0.26025944 | 0.29231904 | 5.40E-05   |
| -0.2452913 | 0.00076468 | 0.02834474 | 0.70172415 | -0.0861691 | 0.24351213 |
| -0.1465159 | 0.04658237 | -0.1278402 | 0.08289108 | -0.3199896 | 8.99E-06   |
| 0.02241039 | 0.76205268 | -0.0303999 | 0.68123706 | 0.24783829 | 0.00067056 |
| 0.35900273 | 5.22E-07   | 0.0312904  | 0.67243073 | -0.1414418 | 0.054802   |
| 0.27168755 | 0.00018335 | -0.0309672 | 0.67562143 | 0.21477432 | 0.00332705 |
| -0.0174616 | 0.81350174 | -0.1176133 | 0.11084433 | -0.2352271 | 0.00126813 |

|            |            |            |            |            |            |
|------------|------------|------------|------------|------------|------------|
| 0.10965344 | 0.13732585 | -0.0714731 | 0.33365045 | 0.09527745 | 0.19702749 |
| 0.35119248 | 9.52E-07   | 0.13654403 | 0.06383916 | -0.3679641 | 2.57E-07   |
| -0.2910591 | 5.84E-05   | -0.0705412 | 0.34000792 | -0.1169095 | 0.11301122 |
| -0.3139156 | 1.35E-05   | -0.3506014 | 9.95E-07   | 0.39360301 | 2.98E-08   |
| -0.0284347 | 0.70082226 | -0.1444474 | 0.04975712 | -0.298976  | 3.57E-05   |
| -0.1142578 | 0.12147398 | -0.2239654 | 0.00217934 | 0.40481219 | 1.10E-08   |
| 0.10272194 | 0.1641093  | -0.0660185 | 0.3719442  | 0.4074812  | 8.58E-09   |
| -0.0404728 | 0.58439063 | -0.2314925 | 0.00152189 | 0.19955756 | 0.00646282 |
| -0.2077186 | 0.00455195 | -0.1193133 | 0.10574437 | -0.3112503 | 1.62E-05   |
| -0.1955389 | 0.00764429 | 0.11438599 | 0.12105377 | -0.2319861 | 0.00148588 |
| 0.17117838 | 0.01982099 | 0.00587308 | 0.93676074 | -0.3529726 | 8.31E-07   |
| -0.3567651 | 6.21E-07   | -0.1376046 | 0.06178508 | 0.33756789 | 2.61E-06   |
| -0.0522367 | 0.48008707 | 0.02393746 | 0.74637397 | -0.3207695 | 8.52E-06   |
| -0.3595561 | 5.00E-07   | -0.2588746 | 0.00037361 | -0.3717793 | 1.88E-07   |
| 0.22832355 | 0.00177272 | 0.02464072 | 0.73918789 | -0.5483256 | 6.53E-16   |
| -0.2570756 | 0.00041171 | -0.3150225 | 1.26E-05   | 0.24638809 | 0.00072275 |
| 0.29180907 | 5.57E-05   | 0.01939482 | 0.79329462 | -0.4357639 | 5.66E-10   |
| -0.1121229 | 0.12863798 | -0.1787068 | 0.01494021 | -0.566108  | 4.56E-17   |
| 0.18728712 | 0.01068782 | -0.0022291 | 0.97597623 | 0.2390275  | 0.00105021 |
| -0.3492329 | 1.10E-06   | -0.3544277 | 7.43E-07   | -0.3966346 | 2.28E-08   |
| -0.3107355 | 1.67E-05   | -0.2825326 | 9.76E-05   | -0.1806902 | 0.01384391 |
| -0.3194072 | 9.35E-06   | -0.1342987 | 0.06837238 | -0.3364433 | 2.84E-06   |
| 0.58857782 | 1.25E-18   | 0.51144776 | 1.01E-13   | -0.2898561 | 6.28E-05   |
| -0.0315592 | 0.66978153 | -0.1589093 | 0.03073415 | -0.4785828 | 5.57E-12   |
| 0.15788471 | 0.0318419  | -0.0327087 | 0.65849725 | -0.2187397 | 0.00277768 |
| -0.1021016 | 0.16668459 | -0.1274357 | 0.0838773  | 0.09268849 | 0.20953028 |
| 0.119647   | 0.10476533 | 0.24378843 | 0.00082578 | -0.2643284 | 0.00027715 |
| -0.0554806 | 0.45320552 | -0.1189694 | 0.10676083 | 0.17393302 | 0.01789484 |
| -0.2406859 | 0.00096635 | -0.1914045 | 0.00905655 | 0.36069793 | 4.57E-07   |
| 0.08175033 | 0.26862223 | 0.2133368  | 0.00354927 | 0.11133342 | 0.13136807 |
| 0.14546851 | 0.04818909 | -0.0184653 | 0.8029942  | -0.3462833 | 1.38E-06   |
| -0.146909  | 0.045991   | -0.1086118 | 0.14112216 | -0.4938618 | 9.11E-13   |
| -0.1689007 | 0.02154675 | 0.00305211 | 0.967111   | -0.2275168 | 0.00184233 |
| 0.01127826 | 0.87889823 | -0.0767477 | 0.29911273 | 0.1088421  | 0.14027616 |
| -0.1727516 | 0.01870004 | -0.1755351 | 0.01685115 | 0.26263467 | 0.0003043  |
| -0.2203374 | 0.0025806  | -0.2533538 | 0.00050221 | -0.2794932 | 0.00011677 |
| -0.1951665 | 0.00776296 | -0.1713555 | 0.01969192 | 0.30698976 | 2.13E-05   |
| -0.0694288 | 0.34769637 | -0.1857534 | 0.01135872 | 0.51465371 | 6.68E-14   |
| 0.2875036  | 7.25E-05   | 0.17470778 | 0.01738329 | -0.4009992 | 1.55E-08   |
| -0.2527906 | 0.00051741 | -0.2902647 | 6.13E-05   | 0.25687846 | 0.00041609 |
| -0.1194538 | 0.10533127 | -0.1383118 | 0.06044591 | -0.3611869 | 4.40E-07   |
| -0.0415038 | 0.57484603 | -0.1398419 | 0.05762987 | -0.0349215 | 0.63699176 |
| -0.0458319 | 0.53559935 | -0.1497566 | 0.04189192 | 0.27035118 | 0.00019781 |
| -0.3029052 | 2.78E-05   | -0.1266604 | 0.08579345 | -0.1090874 | 0.13937915 |
| -0.0417203 | 0.57285159 | -0.1116696 | 0.13020009 | 0.30893735 | 1.88E-05   |
| -0.2545585 | 0.00047108 | -0.2455427 | 0.00075488 | -0.5231908 | 2.17E-14   |



|            |            |            |            |            |            |
|------------|------------|------------|------------|------------|------------|
| -0.2449498 | 0.00077819 | -0.2091111 | 0.00428218 | -0.2055771 | 0.0049967  |
| 0.25207169 | 0.00053743 | 0.12430009 | 0.09184417 | -0.4791734 | 5.20E-12   |
| 0.01524933 | 0.8367757  | -0.2212658 | 0.00247199 | 0.0867471  | 0.24035271 |
| 0.06525883 | 0.37748424 | -0.0914761 | 0.215577   | 0.03629431 | 0.62380012 |
| 0.12674278 | 0.08558821 | -0.0380589 | 0.60701787 | -0.4201778 | 2.61E-09   |
| 0.02006888 | 0.78628066 | -0.049585  | 0.5026853  | 0.22054889 | 0.00255549 |
| -0.0863943 | 0.24227756 | -0.1340643 | 0.06886055 | 0.1965821  | 0.00732046 |
| 0.16154563 | 0.02803365 | 0.1903092  | 0.00946741 | -0.1709111 | 0.02001708 |
| -0.2703429 | 0.0001979  | -0.1700605 | 0.0206524  | -0.3067578 | 2.17E-05   |
| -0.2125324 | 0.00367939 | -0.197817  | 0.00695294 | 0.13710326 | 0.06274923 |
| -0.1925634 | 0.00863905 | -0.2793975 | 0.00011742 | 0.21659851 | 0.00306317 |
| -0.1768012 | 0.01606422 | -0.2382751 | 0.00109041 | 0.16062542 | 0.02895226 |
| -0.5141402 | 7.14E-14   | -0.5332449 | 5.53E-15   | 0.15199256 | 0.03889224 |
| 0.14184984 | 0.05409937 | 0.12552633 | 0.08865958 | -0.2664574 | 0.00024623 |
| 0.09953541 | 0.17765778 | -0.0793625 | 0.28290131 | 0.18009615 | 0.01416462 |
| -0.3691359 | 2.33E-07   | -0.2076945 | 0.00455675 | -0.5425547 | 1.50E-15   |
| 0.03355026 | 0.65028407 | -0.0408533 | 0.58085966 | 0.1895849  | 0.00974809 |
| -0.0492829 | 0.50529542 | -0.1098145 | 0.13674578 | 0.22100103 | 0.00250254 |
| 0.32335249 | 7.14E-06   | 0.14090398 | 0.05573949 | -0.0162202 | 0.82654294 |
| -0.1544601 | 0.03579399 | -0.2757285 | 0.0001454  | -0.3015921 | 3.02E-05   |
| -0.3087628 | 1.90E-05   | -0.308614  | 1.92E-05   | 0.05350149 | 0.46950484 |
| 0.0605842  | 0.41267128 | 0.03544198 | 0.63197687 | -0.3875827 | 5.02E-08   |
| 0.13693399 | 0.06307751 | -0.1960218 | 0.00749285 | -0.3667009 | 2.84E-07   |
| 0.29302172 | 5.17E-05   | 0.11870399 | 0.10755062 | -0.4299286 | 1.01E-09   |
| -0.4589164 | 5.04E-11   | -0.3925447 | 3.27E-08   | 0.32545424 | 6.17E-06   |
| -0.2157837 | 0.00317861 | -0.237554  | 0.00113026 | 0.09662417 | 0.19074219 |
| 0.16494418 | 0.02485377 | 0.01380837 | 0.85201345 | -0.106204  | 0.15020387 |
| -0.298077  | 3.77E-05   | -0.3687691 | 2.40E-07   | -0.370581  | 2.08E-07   |
| 0.21175088 | 0.0038099  | 0.0401921  | 0.58700175 | 0.26566213 | 0.00025738 |
| -0.0405684 | 0.5835028  | -0.1070225 | 0.14706829 | 0.14347584 | 0.05137336 |
| -0.0040577 | 0.95628412 | -0.0638084 | 0.3882003  | 0.32276176 | 7.44E-06   |
| -0.0534965 | 0.46954676 | -0.0585217 | 0.42878974 | 0.23071242 | 0.00158043 |
| -0.1496414 | 0.04205164 | -0.1002294 | 0.17463881 | 0.26579117 | 0.00025554 |
| 0.03567623 | 0.62972512 | -0.1104924 | 0.13432512 | 0.2584489  | 0.00038231 |
| 0.07593194 | 0.30429345 | -0.0474648 | 0.52114817 | 0.18553095 | 0.01145902 |
| -0.1070258 | 0.1470556  | -0.189626  | 0.00973196 | -0.0156956 | 0.83206894 |
| -0.1595053 | 0.030105   | -0.1586011 | 0.03106391 | -0.140028  | 0.05729486 |
| -0.4601443 | 4.41E-11   | -0.3551551 | 7.03E-07   | 0.34046154 | 2.12E-06   |
| -0.2092057 | 0.00426437 | -0.2041361 | 0.00531752 | 0.18448229 | 0.01194252 |
| -0.1530408 | 0.03754949 | -0.1294703 | 0.07901146 | -0.1485201 | 0.04363262 |
| -0.0331019 | 0.65465414 | -0.1714114 | 0.01965135 | 0.37793768 | 1.13E-07   |
| 0.10303988 | 0.16280106 | -0.0503809 | 0.49584442 | 0.07010374 | 0.34301828 |
| 0.20434409 | 0.00527009 | 0.07787092 | 0.29207482 | -0.2695353 | 0.00020715 |
| 0.00741107 | 0.92024937 | -0.1403147 | 0.05678185 | 0.15456138 | 0.03567141 |
| -0.3419215 | 1.90E-06   | -0.1713578 | 0.01969025 | 0.03793586 | 0.60818163 |
| 0.15380912 | 0.03659037 | -0.0568734 | 0.44192836 | 0.38426884 | 6.67E-08   |

|            |            |            |            |            |            |
|------------|------------|------------|------------|------------|------------|
| -0.2090363 | 0.00429629 | -0.035606  | 0.63039977 | -0.1337474 | 0.06952477 |
| 0.35349849 | 7.98E-07   | 0.1087747  | 0.14052338 | -0.1066541 | 0.14847338 |
| 0.2958121  | 4.35E-05   | 0.0370693  | 0.61640502 | -0.3375168 | 2.62E-06   |
| 0.09947147 | 0.17793783 | -0.092255  | 0.21167817 | 0.1198458  | 0.10418547 |
| -0.045655  | 0.53717636 | -0.1200451 | 0.10360672 | 0.23668368 | 0.00118013 |
| 0.14639743 | 0.04676187 | 0.07242166 | 0.32725808 | -0.4190372 | 2.91E-09   |
| -0.0667528 | 0.36663727 | -0.0024741 | 0.97333684 | -0.456168  | 6.78E-11   |
| -0.0088789 | 0.90452247 | -0.1010485 | 0.17112492 | 0.09936663 | 0.17839779 |
| -0.0290084 | 0.69508403 | 0.05197755 | 0.48227106 | -0.071167  | 0.33573022 |
| 0.10604654 | 0.15081269 | 0.02675129 | 0.71775901 | 0.29863848 | 3.64E-05   |
| -0.0788256 | 0.28618085 | -0.1566963 | 0.03316907 | 0.09189448 | 0.21347658 |
| -0.3262975 | 5.82E-06   | -0.1937217 | 0.00823894 | -0.4245991 | 1.71E-09   |
| 0.02854228 | 0.6997453  | -0.0833787 | 0.25917102 | 0.17153047 | 0.01956519 |
| 0.16521152 | 0.02461734 | 0.05225363 | 0.47994453 | 0.37527879 | 1.41E-07   |
| 0.26157751 | 0.00032247 | 0.12631873 | 0.08664906 | -0.4026814 | 1.33E-08   |
| 0.15712769 | 0.032682   | -0.0578919 | 0.43378264 | -0.2657364 | 0.00025632 |
| 0.29469285 | 4.66E-05   | 0.09133509 | 0.21628851 | -0.2567374 | 0.00041926 |
| 0.05982951 | 0.41852738 | -0.0341798 | 0.64416793 | 0.17870691 | 0.01494014 |
| 0.06764286 | 0.36026787 | -0.074354  | 0.31448174 | -0.4776689 | 6.19E-12   |
| -0.0327809 | 0.65779071 | -0.0925141 | 0.21039237 | 0.29865674 | 3.64E-05   |
| -0.1905148 | 0.00938904 | -0.1628904 | 0.02673605 | -0.4481833 | 1.58E-10   |
| 0.04955159 | 0.50297382 | -0.0117919 | 0.87342763 | 0.32384668 | 6.90E-06   |
| -0.2706873 | 0.00019408 | 0.06080886 | 0.41093729 | -0.18468   | 0.01185    |
| -0.0261196 | 0.72415005 | -0.0804944 | 0.27606999 | 0.20945769 | 0.0042173  |
| -0.0756465 | 0.30612    | 0.06971807 | 0.3456865  | -0.2732176 | 0.00016801 |
| -0.1893384 | 0.00984527 | -0.0397438 | 0.59118268 | -0.3662285 | 2.95E-07   |
| 0.43877846 | 4.18E-10   | 0.30701386 | 2.13E-05   | -0.1238667 | 0.09299122 |
| 0.05133925 | 0.48767331 | -0.0515512 | 0.48587614 | 0.37900258 | 1.04E-07   |
| 0.10894795 | 0.13988853 | 0.1812368  | 0.01355444 | -0.1139061 | 0.12263236 |
| -0.3103599 | 1.71E-05   | -0.3403254 | 2.14E-06   | 0.46890597 | 1.68E-11   |
| -0.1752717 | 0.017019   | -0.2721192 | 0.00017889 | 0.2564428  | 0.00042594 |
| 0.31023087 | 1.73E-05   | 0.07667448 | 0.29957508 | 0.04759102 | 0.52003906 |
| -0.2745664 | 0.00015548 | -0.4330376 | 7.44E-10   | 0.00732347 | 0.92118899 |
| -0.0424443 | 0.5662046  | -0.1252342 | 0.08941003 | 0.17799906 | 0.01534937 |
| 0.03190782 | 0.66635088 | 0.10109526 | 0.17092586 | -0.1777808 | 0.01547749 |
| -0.1516561 | 0.03933176 | -0.170838  | 0.02007103 | -0.1251399 | 0.08965341 |
| -0.1690127 | 0.02145898 | -0.3223539 | 7.65E-06   | 0.26119722 | 0.00032925 |
| 0.03091706 | 0.67611739 | 0.00775582 | 0.91655262 | -0.0286953 | 0.69821371 |
| -0.2291039 | 0.00170769 | -0.0457106 | 0.53668074 | -0.2550691 | 0.00045843 |
| -0.2326797 | 0.00143659 | -0.2711625 | 0.00018891 | 0.39134632 | 3.63E-08   |
| 0.10468224 | 0.15616709 | -0.0041992 | 0.95476185 | 0.3544944  | 7.40E-07   |
| 0.17145073 | 0.01962287 | 0.14631499 | 0.0468871  | -0.314656  | 1.29E-05   |
| -0.3296108 | 4.62E-06   | -0.2361849 | 0.00120962 | 0.18679748 | 0.0108981  |
| -0.0739809 | 0.31692328 | -0.1364839 | 0.0639573  | 0.18771289 | 0.01050788 |
| 0.00266065 | 0.97132741 | -0.2424582 | 0.00088357 | 0.29928162 | 3.50E-05   |
| 0.03547346 | 0.63167413 | -0.0643456 | 0.38420996 | 0.25339454 | 0.00050113 |

|            |            |            |            |            |            |
|------------|------------|------------|------------|------------|------------|
| -0.2562487 | 0.0004304  | -0.1668488 | 0.02321108 | -0.0279993 | 0.7051898  |
| -0.0774139 | 0.29492499 | -0.0253378 | 0.73208684 | -0.0776012 | 0.29375492 |
| -0.0536831 | 0.46799595 | -0.1949229 | 0.00784144 | 0.18478193 | 0.01180257 |
| 0.0979541  | 0.18468017 | 0.16634409 | 0.02363699 | 0.18676352 | 0.01091282 |
| 0.16622688 | 0.02373686 | 0.21859494 | 0.00279619 | -0.2969652 | 4.05E-05   |
| -0.194447  | 0.00799686 | -0.1443557 | 0.04994647 | 0.17549717 | 0.01687522 |
| 0.09033274 | 0.22139313 | 0.01843227 | 0.80333925 | 0.22415089 | 0.00216043 |
| -0.1193101 | 0.10575382 | 0.00168649 | 0.9818231  | -0.3594098 | 5.05E-07   |
| 0.25819546 | 0.00038759 | 0.23267885 | 0.00143665 | -0.1439551 | 0.05059201 |
| 0.20609116 | 0.00488652 | 0.10232477 | 0.1657546  | 0.28662252 | 7.64E-05   |
| -0.2786141 | 0.00012294 | -0.2610233 | 0.00033239 | 0.25251041 | 0.00052513 |
| -0.2591628 | 0.00036782 | -0.1421929 | 0.05351451 | -0.118603  | 0.10785234 |
| -0.2158963 | 0.00316242 | -0.1337617 | 0.06949467 | -0.174443  | 0.01755664 |
| 0.00517028 | 0.94431522 | -0.0513764 | 0.48735784 | 0.25241079 | 0.0005279  |
| -0.040627  | 0.58295899 | -0.0626589 | 0.39682261 | 0.35246525 | 8.64E-07   |
| 0.39066726 | 3.85E-08   | 0.27720892 | 0.00013343 | -0.3096885 | 1.79E-05   |
| -0.1173678 | 0.11159645 | -0.1489926 | 0.04296038 | -0.3671639 | 2.74E-07   |
| 0.14946481 | 0.04229734 | 0.13445548 | 0.06804762 | -0.055451  | 0.45344728 |
| 0.13680612 | 0.06332643 | 0.26240366 | 0.00030818 | -0.3662349 | 2.95E-07   |
| -0.3256079 | 6.11E-06   | -0.2550987 | 0.00045771 | 0.30906886 | 1.86E-05   |
| 0.30004577 | 3.33E-05   | 0.24697484 | 0.0007012  | -0.0741951 | 0.31552024 |
| -0.0437825 | 0.55401577 | -0.1046238 | 0.1563997  | 0.2684054  | 0.00022077 |
| 0.25314991 | 0.00050767 | 0.15847839 | 0.03119596 | -0.0410805 | 0.57875605 |
| 0.22763299 | 0.00183215 | 0.10572173 | 0.15207468 | -0.1151651 | 0.11852469 |
| 0.04739433 | 0.5217673  | -0.0807901 | 0.27430389 | 0.18643332 | 0.01105684 |
| 0.12195349 | 0.09819207 | 0.01260494 | 0.8647817  | -0.3588399 | 5.28E-07   |
| -0.2596399 | 0.00035841 | -0.1609333 | 0.02864211 | -0.0412487 | 0.57720097 |
| -0.253738  | 0.00049208 | -0.2821702 | 9.97E-05   | -0.3240079 | 6.82E-06   |
| 0.36819011 | 2.52E-07   | -0.0187886 | 0.7996168  | -0.3662727 | 2.94E-07   |
| -0.2086751 | 0.00436506 | -0.3234133 | 7.11E-06   | 0.07965916 | 0.28109986 |
| 0.24665029 | 0.00071305 | -0.0835664 | 0.25809649 | 0.10679689 | 0.14792756 |
| -0.1944887 | 0.00798313 | -0.2274715 | 0.00184631 | 0.2441951  | 0.00080882 |
| 0.70831661 | 1.73E-29   | 0.45971436 | 4.62E-11   | -0.1690547 | 0.02142609 |
| 0.05579144 | 0.45067506 | -0.0736141 | 0.31933496 | 0.11366946 | 0.12341654 |
| -0.0145439 | 0.84422802 | 0.09622867 | 0.19257262 | 0.43431096 | 6.55E-10   |
| 0.10341872 | 0.16125242 | -0.0303814 | 0.68141993 | 0.23746302 | 0.00113538 |
| 0.20775692 | 0.00454433 | 0.07874018 | 0.28670476 | 0.18488349 | 0.01175546 |
| 0.05504616 | 0.45675634 | -0.0197312 | 0.78979259 | 0.49245122 | 1.08E-12   |
| -0.1116927 | 0.13012017 | -0.0790578 | 0.28475925 | 0.51760105 | 4.54E-14   |
| -0.4997577 | 4.42E-13   | -0.365563  | 3.11E-07   | 0.1672938  | 0.022841   |
| -0.2742136 | 0.00015867 | -0.1438618 | 0.05074333 | -0.0834134 | 0.25897204 |
| -0.0420707 | 0.56962988 | -0.0816189 | 0.26939511 | -0.0068524 | 0.92624337 |
| 0.28245496 | 9.80E-05   | 0.16291715 | 0.0267108  | -0.4407045 | 3.43E-10   |
| 0.00011634 | 0.99874603 | -0.0026781 | 0.97113979 | -0.1535287 | 0.03693799 |
| -0.138557  | 0.05998723 | -0.2151781 | 0.00326694 | -0.1198606 | 0.10414234 |
| -0.100695  | 0.17263506 | -0.1299691 | 0.07785393 | 0.05327588 | 0.47138308 |

|            |            |            |            |            |            |
|------------|------------|------------|------------|------------|------------|
| 0.09299825 | 0.20800504 | 0.01084148 | 0.88355439 | 0.15141745 | 0.03964594 |
| -0.135019  | 0.06689048 | -0.1779065 | 0.01540359 | -0.245992  | 0.00073765 |
| -0.0438065 | 0.55379795 | -0.1536689 | 0.0367638  | -0.2196836 | 0.00265966 |
| 0.0695275  | 0.34700978 | -0.1369549 | 0.06303695 | 0.29663351 | 4.13E-05   |
| -0.4521037 | 1.05E-10   | -0.2448657 | 0.00078155 | -0.429956  | 1.01E-09   |
| -0.0192885 | 0.79440271 | -0.1150773 | 0.1188075  | 0.265423   | 0.00026083 |
| -0.0691575 | 0.34958815 | -0.1010129 | 0.17127638 | -0.4194857 | 2.79E-09   |
| -0.1065239 | 0.14897244 | -0.0306649 | 0.67861219 | 0.126207   | 0.08693031 |
| 0.08920903 | 0.22721687 | -0.015669  | 0.83234896 | 0.20874611 | 0.00435146 |
| -0.1091727 | 0.13906825 | -0.1568824 | 0.03295824 | 0.26798114 | 0.0002261  |
| -0.0612132 | 0.40782748 | -0.1143621 | 0.1211321  | 0.21394883 | 0.00345307 |
| 0.17406664 | 0.01780569 | -0.0121016 | 0.87013278 | 0.18096117 | 0.01369974 |
| 0.31552931 | 1.22E-05   | 0.18900207 | 0.00997927 | -0.2398399 | 0.00100833 |
| -0.1700539 | 0.0206574  | -0.2745138 | 0.00015596 | 0.13975595 | 0.05778512 |
| -0.0940272 | 0.20299573 | -0.015508  | 0.83404614 | -0.3750201 | 1.44E-07   |
| 0.04352359 | 0.55636359 | -0.0883261 | 0.23186819 | 0.26908205 | 0.00021252 |
| -0.0968214 | 0.18983403 | -0.1395655 | 0.05813047 | 0.24137442 | 0.00093338 |
| -0.3922509 | 3.35E-08   | -0.259715  | 0.00035695 | 0.42363126 | 1.87E-09   |
| -0.2735089 | 0.00016523 | -0.3805608 | 9.11E-08   | 0.15729689 | 0.03249261 |
| -0.2020937 | 0.00580382 | -0.1976468 | 0.00700258 | 0.09537737 | 0.19655604 |
| -0.4806274 | 4.39E-12   | -0.4017483 | 1.45E-08   | 0.34245365 | 1.83E-06   |
| -0.1886347 | 0.01012744 | -0.0551126 | 0.45621259 | 0.18403083 | 0.01215614 |
| -0.0409701 | 0.57977769 | -0.1357635 | 0.06538619 | 0.32120594 | 8.27E-06   |
| -0.1100882 | 0.13576471 | -0.2252659 | 0.00204991 | 0.16491825 | 0.02487681 |
| -0.1422417 | 0.05343169 | -0.0886541 | 0.23013237 | 0.36262875 | 3.92E-07   |
| -0.1135537 | 0.12380147 | 0.02566101 | 0.72880251 | -0.2327574 | 0.00143116 |
| -0.0235977 | 0.74985398 | 0.09468062 | 0.19986052 | -0.0738563 | 0.31774092 |
| 0.12957369 | 0.07877036 | 0.00573922 | 0.93819927 | 0.22054868 | 0.00255551 |
| 0.25281257 | 0.00051681 | 0.06095729 | 0.40979407 | 0.2263638  | 0.00194614 |
| -0.0787023 | 0.28693764 | -0.1164997 | 0.11428804 | -0.0032641 | 0.96482792 |
| -0.258028  | 0.00039111 | -0.1715107 | 0.01957948 | 0.14407452 | 0.05039883 |
| 0.0215779  | 0.77064154 | -0.0162184 | 0.82656183 | 0.01742442 | 0.81389112 |
| -0.3939673 | 2.89E-08   | -0.3177451 | 1.05E-05   | 0.12385646 | 0.09301851 |
| -0.4931179 | 9.97E-13   | -0.3521391 | 8.86E-07   | 0.47017102 | 1.45E-11   |
| -0.1079505 | 0.14357389 | -0.2159536 | 0.00315421 | 0.18828934 | 0.01026854 |
| -0.1982607 | 0.00682493 | -0.2121951 | 0.00373522 | 0.20620885 | 0.00486161 |
| 0.05554874 | 0.45265045 | 0.05983768 | 0.41846371 | 0.14219683 | 0.05350781 |
| -0.1827284 | 0.01279136 | -0.278345  | 0.00012488 | 0.42318771 | 1.96E-09   |
| -0.0775994 | 0.29376585 | -0.0226631 | 0.75945136 | -0.1039621 | 0.15905036 |
| -0.3304303 | 4.36E-06   | -0.3149607 | 1.26E-05   | 0.484542   | 2.78E-12   |
| 0.09434392 | 0.20147178 | 0.20365798 | 0.00542796 | 0.15436275 | 0.03591214 |
| -0.1897324 | 0.00969033 | -0.0792487 | 0.28359385 | -0.1027958 | 0.16380479 |
| 0.21626345 | 0.00311017 | 0.05864151 | 0.4278435  | 0.20749623 | 0.00459642 |
| 0.04494736 | 0.54351009 | -0.0897646 | 0.22432438 | 0.25417953 | 0.00048067 |
| 0.31807292 | 1.02E-05   | 0.05718131 | 0.43945652 | 0.19955353 | 0.00646391 |
| -0.3011426 | 3.11E-05   | -0.2756496 | 0.00014606 | 0.14301405 | 0.05213571 |

|            |            |            |            |            |            |
|------------|------------|------------|------------|------------|------------|
| 0.37289078 | 1.72E-07   | 0.10070256 | 0.17260252 | -0.1858322 | 0.01132332 |
| -0.2172483 | 0.00297385 | -0.3040878 | 2.58E-05   | 0.33977495 | 2.23E-06   |
| -0.3056302 | 2.33E-05   | 0.04218003 | 0.56862633 | 0.09893249 | 0.18031163 |
| -0.2340992 | 0.00134036 | -0.308959  | 1.88E-05   | 0.3428851  | 1.77E-06   |
| 0.0842142  | 0.25441168 | -0.0181065 | 0.80674584 | 0.06647681 | 0.36862662 |
| 0.57044181 | 2.33E-17   | 0.25122298 | 0.00056198 | 0.25711197 | 0.0004109  |
| 0.02620675 | 0.72326758 | -0.0504252 | 0.49546513 | 0.25651676 | 0.00042426 |
| 0.08227488 | 0.26555244 | 0.09296716 | 0.20815776 | 0.3909613  | 3.75E-08   |
| -0.2030439 | 0.00557283 | -0.3286423 | 4.94E-06   | 0.32452084 | 6.59E-06   |
| -0.2024061 | 0.00572695 | -0.1315685 | 0.07423457 | 0.36878311 | 2.40E-07   |
| 0.32309817 | 7.27E-06   | 0.31183695 | 1.55E-05   | 0.32303423 | 7.30E-06   |
| 0.23791173 | 0.00111033 | 0.0610686  | 0.40893799 | 0.21264882 | 0.00366029 |
| 0.39355149 | 2.99E-08   | 0.19899942 | 0.00661651 | -0.0682255 | 0.35613595 |
| 0.13016515 | 0.0774028  | -0.0425421 | 0.56530951 | 0.1139163  | 0.12259859 |
| -0.0321783 | 0.66369447 | -0.1404486 | 0.05654359 | 0.12321821 | 0.09472896 |
| 0.11112794 | 0.13208594 | 0.12127595 | 0.10008816 | -0.2202085 | 0.00259602 |
| -0.0144084 | 0.84566177 | -0.1934515 | 0.00833079 | 0.28743531 | 7.28E-05   |
| -0.2595777 | 0.00035963 | -0.3493914 | 1.09E-06   | 0.31719301 | 1.09E-05   |
| -0.0304276 | 0.68096284 | -0.0368642 | 0.6183588  | -0.1098464 | 0.13663125 |
| 0.17858291 | 0.01501113 | -0.0845689 | 0.25240935 | -0.3214639 | 8.13E-06   |
| 0.0310547  | 0.67475727 | -0.0487405 | 0.50999772 | 0.40201548 | 1.41E-08   |
| 0.07699669 | 0.29754274 | -0.2181296 | 0.00285647 | -0.263235  | 0.0002944  |
| -0.0252583 | 0.73289632 | -0.1673318 | 0.02280968 | -0.0966675 | 0.19054221 |
| -0.0069028 | 0.92570278 | -0.1723931 | 0.01895051 | 0.17503256 | 0.01717266 |
| -0.1365293 | 0.06386808 | -0.0421954 | 0.56848564 | 0.02116209 | 0.77494191 |
| -0.1324606 | 0.07227586 | -0.2081928 | 0.0044584  | 0.30163302 | 3.01E-05   |
| 0.04783599 | 0.51789071 | -0.0439589 | 0.55241817 | 0.26517465 | 0.00026445 |
| -0.1818583 | 0.01323179 | -0.1120118 | 0.12901941 | -0.2253054 | 0.0020461  |
| -0.2881883 | 6.95E-05   | -0.0634311 | 0.391018   | -0.1646466 | 0.02511925 |
| -0.2990691 | 3.55E-05   | -0.1206197 | 0.10195227 | -0.1746212 | 0.01743981 |
| -0.3057075 | 2.32E-05   | -0.0220823 | 0.76543452 | -0.332561  | 3.75E-06   |
| 0.01848717 | 0.80276543 | -0.0586804 | 0.42753634 | 0.19431727 | 0.00803968 |
| -0.2276723 | 0.00182872 | -0.2923115 | 5.40E-05   | 0.25483576 | 0.00046417 |
| -0.0627543 | 0.39610254 | -0.2023068 | 0.00575127 | 0.31924708 | 9.46E-06   |
| 0.2230872  | 0.00227089 | 0.01361296 | 0.85408414 | 0.21382634 | 0.00347214 |
| -0.1989821 | 0.00662132 | -0.2408486 | 0.00095847 | 0.16048554 | 0.02909412 |
| -0.2175273 | 0.00293622 | -0.1036325 | 0.1603833  | 0.20674654 | 0.00474922 |
| -0.4298678 | 1.02E-09   | -0.3988367 | 1.88E-08   | 0.17635254 | 0.01633932 |
| -0.2348692 | 0.00129065 | -0.196601  | 0.0073147  | 0.08907746 | 0.22790578 |
| -0.0569148 | 0.44159511 | -0.148404  | 0.04379914 | 0.22752889 | 0.00184127 |
| -0.1818519 | 0.01323508 | -0.2903829 | 6.08E-05   | 0.37327452 | 1.67E-07   |
| 0.29730916 | 3.96E-05   | 0.1502164  | 0.04125968 | -0.2005789 | 0.00618979 |
| -0.0876496 | 0.23547681 | -0.1400254 | 0.05729943 | 0.44879425 | 1.48E-10   |
| -0.2062912 | 0.00484423 | -0.0963018 | 0.19223306 | -0.3052047 | 2.40E-05   |
| 0.02272461 | 0.75881836 | -0.0563015 | 0.44653942 | 0.13135876 | 0.0747014  |
| 0.27854361 | 0.00012344 | 0.15065232 | 0.04066771 | -0.0513608 | 0.48749059 |

|            |            |            |            |            |            |
|------------|------------|------------|------------|------------|------------|
| -0.2511651 | 0.00056369 | -0.2808463 | 0.00010783 | 0.11720031 | 0.1121118  |
| 0.26353003 | 0.00028965 | 0.04639016 | 0.53063599 | -0.3679835 | 2.56E-07   |
| 0.3521117  | 8.87E-07   | 0.6025391  | 1.15E-19   | -0.1999684 | 0.00635172 |
| 0.01939034 | 0.79334136 | -0.0393125 | 0.59521859 | 0.18979431 | 0.00966619 |
| 0.1137819  | 0.12304342 | 0.1335619  | 0.069916   | -0.2378929 | 0.00111137 |
| -0.0752773 | 0.30849381 | -0.1235752 | 0.09376924 | -0.2343741 | 0.00132241 |
| 0.06234424 | 0.39920254 | 0.04001765 | 0.58862726 | -0.2277115 | 0.00182531 |
| 0.196704   | 0.00728343 | 0.46755591 | 1.95E-11   | 0.1730655  | 0.0184831  |
| 0.23504099 | 0.0012798  | 0.47009637 | 1.47E-11   | 0.17183655 | 0.01934515 |
| 0.60518702 | 7.24E-20   | 0.43537792 | 5.89E-10   | -0.1145569 | 0.12049544 |
| 0.41663559 | 3.66E-09   | 0.5817035  | 3.86E-18   | -0.3175754 | 1.06E-05   |
| -0.1884049 | 0.01022112 | -0.0079061 | 0.9149414  | -0.396261  | 2.36E-08   |
| -0.0041567 | 0.9552185  | -0.0999524 | 0.17583925 | 0.18591684 | 0.01128548 |
| -0.2945283 | 4.71E-05   | -0.2600693 | 0.00035014 | 0.29391512 | 4.89E-05   |
| -0.0377491 | 0.6099496  | -0.0704938 | 0.34033296 | 0.20844304 | 0.00440975 |
| 0.02999761 | 0.68522952 | -0.1239999 | 0.09263751 | 0.09007035 | 0.2227434  |
| -0.2519617 | 0.00054056 | -0.1658074 | 0.0240973  | 0.3496386  | 1.07E-06   |
| -0.023799  | 0.74779148 | 0.11424951 | 0.12150111 | -0.0849615 | 0.25020603 |
| -0.1469903 | 0.04586956 | -0.0351572 | 0.63471889 | -0.3082999 | 1.96E-05   |
| -0.1826627 | 0.01282414 | -0.1505792 | 0.04076645 | 0.23165203 | 0.00151017 |
| 0.04889167 | 0.50868494 | -0.046524  | 0.52944993 | 0.40767471 | 8.43E-09   |
| -0.0793889 | 0.28274023 | -0.1800967 | 0.01416434 | 0.27066874 | 0.00019428 |
| -0.2090545 | 0.00429285 | -0.1545561 | 0.03567776 | 0.55023324 | 4.94E-16   |
| -0.0340171 | 0.64574663 | -0.0770528 | 0.29719009 | -0.2027148 | 0.00565189 |
| -0.3117861 | 1.56E-05   | -0.184031  | 0.01215608 | -0.507348  | 1.71E-13   |
| -0.4277851 | 1.25E-09   | -0.2453102 | 0.00076394 | 0.03035566 | 0.68167562 |
| 0.25378984 | 0.00049073 | 0.01538849 | 0.83530727 | 0.03866171 | 0.60133105 |
| 0.12253449 | 0.09658889 | 0.07040991 | 0.34090939 | -0.2751844 | 0.00015004 |
| -0.2310558 | 0.00155441 | -0.1743084 | 0.01764537 | 0.12735988 | 0.08406307 |
| 0.37510419 | 1.43E-07   | 0.1192904  | 0.10581183 | 0.23726904 | 0.00114637 |
| -0.269855  | 0.00020344 | -0.0193298 | 0.79397174 | -0.3903718 | 3.95E-08   |
| -0.3089038 | 1.88E-05   | -0.2109747 | 0.00394364 | -0.2269313 | 0.0018944  |
| 0.24362009 | 0.0008329  | 0.0260236  | 0.72512344 | 0.08832419 | 0.23187831 |
| -0.0789403 | 0.28547772 | -0.1942759 | 0.00805338 | 0.09029599 | 0.2215819  |
| -0.245172  | 0.00076938 | -0.2460079 | 0.00073704 | 0.13683975 | 0.06326089 |
| -0.3529334 | 8.33E-07   | -0.2929081 | 5.21E-05   | 0.22556256 | 0.00202139 |
| 0.11680277 | 0.11334263 | -0.0603723 | 0.41431035 | 0.23730817 | 0.00114415 |
| -0.3760391 | 1.33E-07   | -0.217175  | 0.00298381 | 0.20050103 | 0.00621024 |
| 0.11513615 | 0.11861789 | -0.0157754 | 0.83122739 | -0.546279  | 8.78E-16   |
| 0.14420851 | 0.05018283 | 0.00189072 | 0.97962241 | 0.18930757 | 0.00985749 |
| -0.162197  | 0.02739859 | -0.1881942 | 0.0103077  | -0.2512675 | 0.00056067 |
| -0.0352958 | 0.63338405 | 0.020906   | 0.77759394 | 0.22090521 | 0.00251367 |
| -0.1110118 | 0.13249297 | -0.1992205 | 0.00655525 | 0.14775877 | 0.04473414 |
| -0.3677429 | 2.61E-07   | -0.1892922 | 0.0098636  | -0.0372695 | 0.61450131 |
| -0.0128211 | 0.86248532 | -0.0211122 | 0.77545865 | 0.27976507 | 0.00011492 |
| 0.08960315 | 0.22516212 | 0.11678228 | 0.11340634 | -0.2939292 | 4.89E-05   |

|            |            |            |            |            |            |
|------------|------------|------------|------------|------------|------------|
| 0.02231748 | 0.76300984 | 0.03849418 | 0.60290909 | -0.3223919 | 7.63E-06   |
| -0.0165611 | 0.8229571  | -0.016438  | 0.82425156 | -0.4513225 | 1.14E-10   |
| -0.1677178 | 0.02249319 | -0.0035426 | 0.96182916 | -0.3732487 | 1.67E-07   |
| -0.1357186 | 0.06547629 | 0.08354262 | 0.25823261 | -0.4038967 | 1.19E-08   |
| -0.0950706 | 0.19800627 | -0.0605056 | 0.41327891 | -0.3283288 | 5.05E-06   |
| 0.44415978 | 2.41E-10   | 0.32349668 | 7.07E-06   | -0.3529081 | 8.35E-07   |
| -0.3231811 | 7.23E-06   | -0.3037563 | 2.63E-05   | -0.3524759 | 8.63E-07   |
| -0.1550162 | 0.03512536 | -0.2361898 | 0.00120932 | -0.3947506 | 2.69E-08   |
| -0.059335  | 0.42239061 | -0.1264869 | 0.08622722 | 0.09850571 | 0.18220778 |
| -0.2001624 | 0.00629987 | -0.0589262 | 0.42559984 | -0.0716985 | 0.33212446 |
| 0.22924958 | 0.00169578 | 0.19543528 | 0.00767716 | -0.1507203 | 0.04057611 |
| -0.2480613 | 0.00066285 | -0.1558313 | 0.03416444 | -0.2034189 | 0.00548396 |
| -0.0793226 | 0.28314389 | -0.2318378 | 0.00149662 | 0.26685644 | 0.0002408  |
| -0.0123927 | 0.8670368  | -0.0489709 | 0.50799744 | 0.27671838 | 0.00013729 |
| 0.09697847 | 0.18911321 | 0.08486058 | 0.2507711  | 0.0860707  | 0.2440528  |
| 0.02670442 | 0.71823262 | -0.1630838 | 0.02655374 | 0.15653462 | 0.03335325 |
| 0.07890321 | 0.28570502 | -0.043622  | 0.55547047 | -0.2618179 | 0.00031825 |
| -0.1484857 | 0.04368181 | -0.1340372 | 0.06891714 | 0.2270961  | 0.00187961 |
| -0.2129087 | 0.00361799 | -0.153183  | 0.03737042 | 0.11320718 | 0.12495974 |
| 0.06168295 | 0.40423199 | -0.0216247 | 0.77015821 | -0.1729262 | 0.01857911 |
| -0.2679187 | 0.00022689 | -0.2211049 | 0.00249051 | 0.28594206 | 7.96E-05   |
| -0.2773922 | 0.00013202 | -0.2741183 | 0.00015954 | 0.02152437 | 0.77119477 |
| 0.06983699 | 0.34486238 | 0.03600149 | 0.62660416 | 0.02653157 | 0.71997992 |
| 0.01918118 | 0.79552125 | -0.0193584 | 0.79367403 | 0.20692694 | 0.00471204 |
| -0.0937288 | 0.20443939 | -0.1955565 | 0.00763874 | 0.17718484 | 0.01583216 |
| 0.09446571 | 0.20088786 | -0.003387  | 0.96350427 | 0.1798909  | 0.01427693 |
| -0.3362086 | 2.88E-06   | -0.1041748 | 0.15819463 | 0.02217877 | 0.76443947 |
| -0.0547614 | 0.45909153 | -0.1883291 | 0.0102522  | 0.16982369 | 0.02083239 |
| -0.3198455 | 9.08E-06   | -0.090809  | 0.21895734 | 0.48739147 | 1.98E-12   |
| 0.21108164 | 0.00392497 | 0.14561461 | 0.04796225 | -0.3103991 | 1.71E-05   |
| -0.1351377 | 0.0666488  | -0.2147618 | 0.00332893 | 0.1522815  | 0.03851814 |
| -0.0317593 | 0.66781112 | -0.1699141 | 0.02076353 | 0.06819813 | 0.35632924 |
| -0.1442251 | 0.05015615 | -0.2231581 | 0.00226336 | 0.3103766  | 1.71E-05   |
| 0.0546567  | 0.45995233 | -0.0998356 | 0.17634713 | 0.18879157 | 0.01006394 |
| 0.33205214 | 3.88E-06   | 0.24637989 | 0.00072306 | -0.2415027 | 0.00092736 |
| 0.07095508 | 0.33717476 | -0.0331316 | 0.6543649  | 0.4398105  | 3.76E-10   |
| -0.1129871 | 0.12569978 | -0.0648563 | 0.38043963 | -0.2693305 | 0.00020956 |
| 0.10822405 | 0.14255582 | 0.01496801 | 0.83974603 | -0.1277507 | 0.08310841 |
| -0.3081201 | 1.98E-05   | -0.2876925 | 7.16E-05   | 0.24625186 | 0.00072784 |
| -0.0017778 | 0.98083971 | -0.1050706 | 0.15462851 | 0.04389431 | 0.55300271 |
| 0.01067489 | 0.88533138 | -0.0826356 | 0.26345558 | -0.1239028 | 0.09289521 |
| -0.0030685 | 0.96693414 | -0.0797454 | 0.28057757 | -0.1090876 | 0.1393784  |
| 0.37450208 | 1.51E-07   | 0.50654396 | 1.89E-13   | -0.114152  | 0.12182158 |
| -0.1136774 | 0.12339025 | -0.1357045 | 0.06550441 | 0.09232149 | 0.21134772 |
| 0.18619772 | 0.01116063 | 0.05275206 | 0.47575962 | 0.26342126 | 0.0002914  |
| 0.04418105 | 0.55040999 | 0.19974478 | 0.00641198 | -0.0736505 | 0.31909501 |

|            |            |            |            |            |            |
|------------|------------|------------|------------|------------|------------|
| -0.1069833 | 0.14721742 | -0.2422876 | 0.00089125 | 0.33537472 | 3.06E-06   |
| -0.3550106 | 7.11E-07   | -0.3800857 | 9.49E-08   | 0.13537324 | 0.06617124 |
| 0.20538481 | 0.00503848 | 0.13828738 | 0.06049173 | 0.20342871 | 0.00548165 |
| -0.1177139 | 0.11053722 | 0.07611498 | 0.30312577 | -0.0180635 | 0.8071966  |
| -0.0785694 | 0.28775478 | -0.1651544 | 0.02466769 | 0.14657331 | 0.04649566 |
| -0.0070379 | 0.92425267 | -0.0574259 | 0.43749926 | 0.49847476 | 5.18E-13   |
| 0.01215369 | 0.86957867 | -0.0742935 | 0.31487716 | 0.22206548 | 0.00238179 |
| -0.0627767 | 0.39593333 | -0.0573205 | 0.43834194 | 0.12290681 | 0.0955725  |
| -0.102526  | 0.16491958 | -0.0236488 | 0.74932948 | 0.03255239 | 0.66002692 |
| 0.0954125  | 0.19639049 | 0.03351488 | 0.65062849 | 0.12482025 | 0.09048235 |
| 0.00077151 | 0.99168421 | -0.0590606 | 0.42454356 | -0.1227446 | 0.09601414 |
| -0.2519019 | 0.00054226 | -0.2908087 | 5.93E-05   | 0.52164418 | 2.66E-14   |
| -0.1704674 | 0.02034637 | -0.2166651 | 0.00305391 | 0.13214262 | 0.07296925 |
| 0.07801696 | 0.29116795 | 0.00423961 | 0.95432661 | 0.15776854 | 0.0319696  |
| 0.16263    | 0.02698325 | 0.07534172 | 0.30807862 | -0.3228153 | 7.41E-06   |
| 0.44912137 | 1.43E-10   | 0.25775642 | 0.00039688 | -0.1588476 | 0.03079992 |
| 0.08005378 | 0.27871587 | -0.1015172 | 0.16913787 | 0.27801621 | 0.0001273  |
| -0.1110151 | 0.13248148 | -0.1609785 | 0.02859682 | -0.0049393 | 0.94679866 |
| -0.3054609 | 2.36E-05   | -0.3624884 | 3.97E-07   | 0.32732252 | 5.42E-06   |
| 0.12975842 | 0.07834117 | 0.03407378 | 0.64519609 | 0.20793771 | 0.00450851 |
| 0.0932762  | 0.20664327 | -0.0259441 | 0.72592959 | 0.10167869 | 0.16845725 |
| -0.1388647 | 0.05941557 | -0.1982828 | 0.00681864 | 0.17893257 | 0.0148117  |
| -0.0207579 | 0.77912867 | -0.1146947 | 0.12004672 | -0.2345767 | 0.00130933 |
| 0.4011722  | 1.52E-08   | 0.14162534 | 0.05448499 | -0.4200641 | 2.64E-09   |
| 0.04425346 | 0.54975618 | -0.0001069 | 0.99884752 | -0.3187394 | 9.79E-06   |
| 0.11207469 | 0.12880333 | 0.14084183 | 0.05584867 | 0.0607932  | 0.41105801 |
| 0.02080287 | 0.77866268 | -0.026718  | 0.71809556 | 0.27944319 | 0.00011711 |
| -0.0277507 | 0.70768659 | -0.074705  | 0.31219673 | 0.27494276 | 0.00015215 |
| 0.14556907 | 0.04803286 | 0.03026392 | 0.68258553 | 0.0915119  | 0.21539689 |
| -0.3193869 | 9.37E-06   | -0.3534632 | 8.00E-07   | 0.34716748 | 1.29E-06   |
| -0.1579822 | 0.03173506 | -0.1842666 | 0.01204418 | -0.3314679 | 4.05E-06   |
| 0.03371934 | 0.64863901 | -0.0120775 | 0.87038942 | 0.17038777 | 0.02040595 |
| -0.0879886 | 0.23366365 | -0.1461481 | 0.04714138 | 0.23495972 | 0.00128492 |
| -0.0386006 | 0.60190683 | 0.06084939 | 0.41062499 | -0.427506  | 1.29E-09   |
| -0.2030007 | 0.00558316 | -0.0658885 | 0.37288915 | -0.3766127 | 1.27E-07   |
| 0.09024832 | 0.22182694 | -0.0828846 | 0.2620145  | -0.1282062 | 0.08200686 |
| 0.08106887 | 0.27264627 | 0.02471182 | 0.73846261 | -0.2042268 | 0.00529678 |
| -0.3996221 | 1.75E-08   | -0.2939516 | 4.88E-05   | 0.35216243 | 8.84E-07   |
| 0.21732162 | 0.00296392 | 0.130119   | 0.07750881 | -0.0136799 | 0.85337489 |
| 0.12112787 | 0.1005064  | -0.0851638 | 0.24907575 | 0.21640524 | 0.0030902  |
| -0.5560277 | 2.10E-16   | -0.4928101 | 1.03E-12   | 0.26290482 | 0.00029981 |
| 0.1392362  | 0.05873139 | 0.07140694 | 0.33409918 | 0.33158009 | 4.02E-06   |
| -0.3796929 | 9.80E-08   | -0.1599504 | 0.02964231 | -0.3385433 | 2.44E-06   |
| -0.1150232 | 0.11898221 | -0.1067268 | 0.14819513 | -0.231766  | 0.00150184 |
| -0.0691633 | 0.34954737 | -0.1307367 | 0.07609947 | -0.0288066 | 0.69710058 |
| 0.16478587 | 0.0249947  | 0.00804479 | 0.9134554  | -0.3849028 | 6.32E-08   |



|            |            |            |            |            |            |
|------------|------------|------------|------------|------------|------------|
| 0.03431013 | 0.64290446 | -0.1165812 | 0.11403333 | 0.21869257 | 0.0027837  |
| 0.13625653 | 0.06440549 | -0.0227062 | 0.75900812 | 0.23264716 | 0.00143887 |
| -0.4162865 | 3.78E-09   | -0.4035819 | 1.22E-08   | 0.36238953 | 4.00E-07   |
| 0.12008209 | 0.10349952 | 0.17042661 | 0.02037687 | -0.2182932 | 0.00283514 |
| 0.0995824  | 0.17745217 | 0.03823208 | 0.6053817  | 0.25439517 | 0.00047519 |
| -0.167745  | 0.022471   | -0.2500091 | 0.0005989  | 0.06803333 | 0.35749538 |
| -0.1558263 | 0.03417028 | -0.1689088 | 0.02154038 | -0.1679771 | 0.02228272 |
| -0.0885494 | 0.23068567 | -0.1147289 | 0.11993547 | 0.37582575 | 1.35E-07   |
| -0.1412621 | 0.05511376 | -0.2661192 | 0.00025091 | 0.2355822  | 0.00124614 |
| -0.1083187 | 0.14220479 | -0.1028177 | 0.16371431 | 0.19627008 | 0.00741602 |
| 0.07921764 | 0.28378341 | -0.0425932 | 0.56484133 | -0.1650704 | 0.0247419  |
| 0.00858308 | 0.90768947 | -0.08937   | 0.22637589 | -0.1246249 | 0.09099195 |
| 0.14599755 | 0.04737188 | 0.23947284 | 0.00102706 | -0.2581267 | 0.00038903 |
| -0.0660966 | 0.37137781 | -0.0776692 | 0.29333033 | -0.3011752 | 3.10E-05   |
| -0.1454797 | 0.04817169 | -0.1176113 | 0.11085029 | -0.2082998 | 0.00443755 |
| 0.0035715  | 0.96151818 | -0.0432757 | 0.55861628 | 0.27335261 | 0.00016671 |
| -0.1974371 | 0.00706421 | -0.2583083 | 0.00038523 | 0.22130582 | 0.00246741 |
| -0.3661995 | 2.96E-07   | -0.3899914 | 4.08E-08   | 0.18000636 | 0.01421366 |
| 0.44762896 | 1.68E-10   | 0.11721489 | 0.11206686 | -0.4585378 | 5.25E-11   |
| 0.22169894 | 0.00242276 | -0.0293363 | 0.69181123 | 0.18274539 | 0.01278288 |
| 0.0496654  | 0.50199225 | 0.00122664 | 0.98677882 | 0.4346161  | 6.36E-10   |
| -0.2352343 | 0.00126768 | -0.1431838 | 0.05185431 | -0.1568122 | 0.03303769 |
| 0.02470409 | 0.73854148 | 0.03757943 | 0.61155813 | -0.3519494 | 8.98E-07   |
| -0.2263951 | 0.00194325 | -0.2815196 | 0.00010363 | 0.12252657 | 0.09661062 |
| -0.1829262 | 0.01269306 | -0.2821929 | 9.96E-05   | 0.24940393 | 0.00061813 |
| 0.00410574 | 0.95576735 | -0.0093492 | 0.89949178 | 0.3148848  | 1.27E-05   |
| -0.0261631 | 0.72371006 | -0.0211993 | 0.77455714 | 0.24128849 | 0.00093744 |
| 0.33692218 | 2.74E-06   | 0.15376118 | 0.0366496  | -0.2132049 | 0.00357033 |
| 0.49601271 | 7.01E-13   | 0.12695224 | 0.08506808 | -0.0928178 | 0.20889243 |
| 0.35315071 | 8.20E-07   | 0.27106023 | 0.00019001 | -0.3353592 | 3.07E-06   |
| -0.2790828 | 0.00011961 | -0.2564545 | 0.00042568 | 0.00306417 | 0.96698115 |
| -0.4618495 | 3.66E-11   | -0.4523724 | 1.02E-10   | 0.37737075 | 1.19E-07   |
| 0.0822852  | 0.26549231 | 0.02172906 | 0.76907993 | 0.19109323 | 0.00917166 |
| 0.18974262 | 0.00968635 | 0.07491806 | 0.31081458 | 0.18822198 | 0.01029625 |
| 0.0323915  | 0.66160324 | -0.0278551 | 0.70663773 | 0.25669485 | 0.00042022 |
| -0.2297327 | 0.00165687 | -0.1202156 | 0.10311346 | 0.12844393 | 0.08143675 |
| -0.0177756 | 0.81021037 | -0.0399828 | 0.5889518  | 0.184163   | 0.01209326 |
| 0.1633492  | 0.02630532 | 0.04610709 | 0.53314963 | 0.21411874 | 0.00342679 |
| -0.1835683 | 0.01237846 | -0.1273563 | 0.08407176 | -0.2947541 | 4.65E-05   |
| 0.14656687 | 0.04650539 | 0.04797493 | 0.51667432 | -0.2364392 | 0.0011945  |
| -0.0587935 | 0.42664459 | -0.0998103 | 0.17645745 | 0.00146849 | 0.98417237 |
| 0.04614077 | 0.53285032 | -0.1317203 | 0.07389833 | 0.20768988 | 0.00455767 |
| -0.1295951 | 0.0787206  | 0.07803125 | 0.29107932 | -0.3363478 | 2.86E-06   |
| -0.2711236 | 0.00018933 | -0.3083701 | 1.95E-05   | 0.0685073  | 0.35414801 |
| 0.07339361 | 0.32079054 | -0.0502665 | 0.49682512 | 0.13691343 | 0.06311747 |
| 0.00495714 | 0.94660728 | 0.03006372 | 0.68457282 | 0.33112222 | 4.15E-06   |

|            |            |            |            |            |            |
|------------|------------|------------|------------|------------|------------|
| 0.05584462 | 0.45024289 | -0.0964655 | 0.19147514 | -0.2440622 | 0.00081433 |
| -0.0581082 | 0.43206394 | -0.0796356 | 0.2812425  | 0.33889099 | 2.38E-06   |
| -0.2225447 | 0.00232917 | -0.2179129 | 0.00288493 | 0.16771241 | 0.02249755 |
| 0.17151778 | 0.01957436 | -0.0077604 | 0.91650385 | -0.2762414 | 0.00014114 |
| -0.1533855 | 0.03711656 | -0.22132   | 0.00246579 | -0.4223565 | 2.12E-09   |
| -0.0633847 | 0.39136489 | 0.00586698 | 0.93682635 | -0.0035294 | 0.96197123 |
| 0.29843663 | 3.69E-05   | 0.2392049  | 0.00104093 | -0.3634711 | 3.67E-07   |
| -0.0128499 | 0.86217934 | 0.05039311 | 0.49574006 | -0.2291137 | 0.00170688 |
| 0.51089568 | 1.09E-13   | 0.14329701 | 0.05166747 | -0.3424892 | 1.82E-06   |
| 0.24437508 | 0.00080142 | 0.13778914 | 0.06143335 | -0.0940079 | 0.20308915 |
| -0.3845842 | 6.49E-08   | -0.1975181 | 0.00704034 | 0.07733213 | 0.29543675 |
| -0.2667459 | 0.00024229 | -0.2055655 | 0.0049992  | 0.51804869 | 4.29E-14   |
| -0.2204892 | 0.00256256 | -0.2810067 | 0.00010682 | 0.38898978 | 4.45E-08   |
| -0.0348573 | 0.63761215 | -0.0702815 | 0.34179317 | -0.0904633 | 0.22072324 |
| -0.0772122 | 0.29618878 | -0.1571762 | 0.03262757 | 0.01732548 | 0.81492877 |
| -0.1481466 | 0.04417008 | -0.1738454 | 0.01795353 | 0.25171134 | 0.00054773 |
| 0.17461014 | 0.01744706 | -0.0199017 | 0.78801822 | 0.18074508 | 0.0138146  |
| -0.1173393 | 0.1116841  | -0.091699  | 0.21445635 | -0.0858774 | 0.24511754 |
| 0.04515189 | 0.54167573 | -0.1135992 | 0.12365014 | 0.43556655 | 5.78E-10   |
| 0.08973005 | 0.22450329 | 0.08090076 | 0.27364521 | -0.1817064 | 0.01331001 |
| -0.1359334 | 0.06504701 | -0.2145134 | 0.00336642 | -0.5667774 | 4.11E-17   |
| 0.06535588 | 0.3767737  | -0.0961405 | 0.19298227 | 0.17356783 | 0.01814046 |
| -0.1903031 | 0.00946976 | -0.1637099 | 0.02597083 | -0.291856  | 5.56E-05   |
| -0.1206916 | 0.10174657 | -0.1355082 | 0.06589894 | 0.27285625 | 0.00017152 |
| 0.03433693 | 0.6426448  | -0.0598585 | 0.4183013  | 0.12842015 | 0.08149365 |
| -0.0875379 | 0.23607679 | -0.1722694 | 0.01903765 | 0.25242186 | 0.00052759 |
| 0.0117196  | 0.87419773 | 0.1000097  | 0.17559049 | -0.340559  | 2.10E-06   |
| -0.0984266 | 0.18256091 | -0.0636661 | 0.38926201 | -0.2923554 | 5.39E-05   |
| -0.166841  | 0.02321757 | -0.0418108 | 0.57201895 | -0.1887955 | 0.01006236 |
| -0.1154341 | 0.11766106 | -0.128597  | 0.08107135 | 0.13850563 | 0.06008301 |
| -0.1317078 | 0.07392609 | -0.1643914 | 0.02534885 | -0.278766  | 0.00012185 |
| -0.1460244 | 0.04733071 | -0.1829786 | 0.01266709 | 0.14675243 | 0.04622586 |
| 0.03924953 | 0.59580868 | -0.0890543 | 0.22802696 | 0.21793896 | 0.0028815  |
| -0.0353699 | 0.63267019 | -0.1197783 | 0.1043822  | 0.06841967 | 0.35476536 |
| -0.2635008 | 0.00029012 | -0.2122748 | 0.00372195 | 0.24731238 | 0.00068907 |
| 0.02196999 | 0.76659276 | 0.14524577 | 0.04853666 | 0.02752212 | 0.70998627 |
| -0.1376305 | 0.06173562 | -0.1119796 | 0.12913017 | 0.36062769 | 4.59E-07   |
| -0.0788866 | 0.2858068  | -0.136943  | 0.06306001 | 0.18842818 | 0.01021162 |
| 0.21586441 | 0.003167   | 0.16493794 | 0.02485932 | -0.2149817 | 0.00329605 |
| -0.0927194 | 0.20937757 | -0.2143479 | 0.00339163 | -0.1220328 | 0.09797205 |
| 0.01329544 | 0.85745108 | -0.0278936 | 0.70625105 | -0.3167352 | 1.12E-05   |
| 0.06549047 | 0.37578973 | -0.0499718 | 0.49935456 | 0.19746277 | 0.00705663 |
| -0.0131021 | 0.8595024  | -0.0404511 | 0.58459221 | 0.22174253 | 0.00241785 |
| -0.0928298 | 0.20883325 | -0.0043702 | 0.95292088 | -0.0874515 | 0.23654125 |
| -0.0521444 | 0.48086439 | -0.1077721 | 0.14424078 | 0.1446429  | 0.04948788 |
| -0.2521676 | 0.00053472 | -0.1414668 | 0.05475864 | -0.3023442 | 2.88E-05   |

|            |            |            |            |            |            |
|------------|------------|------------|------------|------------|------------|
| 0.00289219 | 0.96883336 | -0.1066205 | 0.14860182 | 0.24513232 | 0.00077095 |
| -0.087008  | 0.23893577 | -0.085698  | 0.24610865 | -0.2811918 | 0.00010566 |
| 0.26101607 | 0.00033252 | 0.01065037 | 0.88559287 | -0.1758382 | 0.01665976 |
| 0.00479238 | 0.94837943 | -0.0890623 | 0.22798522 | 0.14479119 | 0.04925248 |
| 0.08708233 | 0.2385335  | 0.02597778 | 0.72558803 | 0.18551238 | 0.01146743 |
| 0.07239556 | 0.32743291 | -0.0288348 | 0.69681832 | 0.11317837 | 0.12505643 |
| -0.3606422 | 4.59E-07   | -0.3065872 | 2.19E-05   | 0.43997051 | 3.70E-10   |
| 0.22918366 | 0.00170116 | 0.41298636 | 5.16E-09   | 0.24664839 | 0.00071312 |
| 0.04660361 | 0.52874455 | -0.0318846 | 0.66657909 | 0.25572413 | 0.00044266 |
| -0.0614019 | 0.40638113 | -0.0205909 | 0.78086024 | 0.35440481 | 7.45E-07   |
| -0.1908354 | 0.009268   | -0.2535734 | 0.0004964  | 0.19733703 | 0.00709378 |
| -0.3212305 | 8.26E-06   | -0.3223525 | 7.65E-06   | 0.17794325 | 0.01538205 |
| -0.0040619 | 0.95623892 | -0.136433  | 0.06405733 | 0.19589901 | 0.0075311  |
| 0.03900664 | 0.59808779 | 0.07313654 | 0.322493   | 0.15551763 | 0.03453153 |
| 0.130563   | 0.07649373 | 0.09078144 | 0.21909759 | -0.2158665 | 0.0031667  |
| -0.1532753 | 0.03725457 | -0.1507666 | 0.04051376 | 0.47371247 | 9.74E-12   |
| -0.2653861 | 0.00026136 | -0.2288321 | 0.00173009 | -0.0425368 | 0.56535803 |
| -0.0471225 | 0.52416069 | -0.0665355 | 0.36820313 | 0.20068587 | 0.00616181 |
| -0.2462861 | 0.00072656 | -0.0632072 | 0.39269592 | -0.3474053 | 1.27E-06   |
| -0.0378898 | 0.60861724 | -0.05875   | 0.42698766 | 0.12473448 | 0.09070577 |
| -0.349467  | 1.08E-06   | -0.210746  | 0.00398384 | 0.09398516 | 0.20319885 |
| 5.94E-05   | 0.99935949 | -0.0367529 | 0.61941956 | 0.20419916 | 0.00530309 |
| -0.0840922 | 0.25510314 | -0.0361377 | 0.62529917 | -0.4231124 | 1.97E-09   |
| 0.02838157 | 0.70135511 | -0.0225958 | 0.76014414 | -0.0143664 | 0.84610533 |
| -0.1026514 | 0.16440048 | -0.1308314 | 0.07588529 | -0.3864633 | 5.53E-08   |
| -0.1573979 | 0.03238002 | -0.0402164 | 0.58677584 | -0.1074829 | 0.14532647 |
| -0.2243636 | 0.00213894 | -0.1505719 | 0.04077637 | -0.2134237 | 0.00353546 |
| -0.182307  | 0.01300303 | -0.1012561 | 0.17024262 | -0.0522324 | 0.48012315 |
| -0.0502249 | 0.49718146 | 0.04025832 | 0.58638529 | -0.156779  | 0.03307529 |
| 0.2206645  | 0.00254185 | 0.09640896 | 0.19173663 | -0.280774  | 0.00010829 |
| 0.08931301 | 0.22667352 | -0.1498959 | 0.04169947 | -0.3323384 | 3.81E-06   |
| -0.2045706 | 0.00521888 | -0.2066956 | 0.00475978 | -0.1465834 | 0.04648045 |
| -0.0855131 | 0.24713261 | -0.1619016 | 0.027685   | 0.23807908 | 0.00110111 |
| -0.1602676 | 0.02931635 | -0.2155189 | 0.00321695 | 0.14352051 | 0.05130012 |
| -0.0075565 | 0.91868922 | -0.0340937 | 0.64500252 | -0.1116838 | 0.13015082 |
| -0.0072293 | 0.92219892 | -0.0918505 | 0.21369672 | 0.29327899 | 5.09E-05   |
| 0.40635109 | 9.52E-09   | 0.18088288 | 0.01374126 | 0.06011148 | 0.4163337  |
| -0.3049771 | 2.43E-05   | -0.1789032 | 0.01482835 | -0.1832297 | 0.01254349 |
| -0.1849206 | 0.01173831 | -0.134613  | 0.06772254 | 0.32640126 | 5.78E-06   |
| 0.14347792 | 0.05136994 | 0.09214665 | 0.21221753 | 0.12378705 | 0.09320333 |
| 0.21592477 | 0.00315834 | 0.12721178 | 0.08442709 | -0.3131695 | 1.42E-05   |
| 0.65832005 | 2.37E-24   | 0.26455362 | 0.00027372 | -0.3168397 | 1.11E-05   |
| 0.05596892 | 0.44923366 | -0.0225908 | 0.76019566 | 0.22690373 | 0.00189688 |
| -0.0188607 | 0.79886435 | -0.1601708 | 0.02941545 | 0.21182574 | 0.00379722 |
| 0.34040005 | 2.13E-06   | 0.17698007 | 0.01595564 | -0.1300487 | 0.07767063 |
| -0.2473327 | 0.00068835 | -0.2041139 | 0.00532259 | 0.1286937  | 0.08084108 |

|            |            |            |            |            |            |
|------------|------------|------------|------------|------------|------------|
| -0.1480322 | 0.04433585 | -0.1802408 | 0.01408592 | 0.05117926 | 0.48903241 |
| -0.1168644 | 0.11315119 | -0.1139593 | 0.12245661 | 0.24308851 | 0.00085574 |
| 0.48233628 | 3.60E-12   | 0.26482988 | 0.00026956 | -0.1434576 | 0.05140332 |
| 0.1941391  | 0.00809884 | -0.0738313 | 0.31790559 | 0.12526577 | 0.08932876 |
| -0.3396504 | 2.25E-06   | -0.274301  | 0.00015788 | 0.13359026 | 0.06985606 |
| -0.3753181 | 1.41E-07   | -0.3412046 | 2.01E-06   | 0.30035753 | 3.27E-05   |
| 0.23732039 | 0.00114345 | 0.05151223 | 0.48620611 | 0.27320833 | 0.0001681  |
| -0.2966168 | 4.14E-05   | -0.1330348 | 0.07103766 | -0.2122564 | 0.00372502 |
| -0.2230485 | 0.002275   | -0.2454402 | 0.00075886 | -0.3352443 | 3.09E-06   |
| 0.0704344  | 0.3407411  | -0.1041638 | 0.15823869 | -0.2902416 | 6.13E-05   |
| 0.19194727 | 0.00885883 | 0.05149129 | 0.48638359 | 0.31649057 | 1.14E-05   |
| 0.06338268 | 0.39138042 | -0.0558523 | 0.45018072 | 0.12841096 | 0.08151564 |
| -0.3759093 | 1.34E-07   | -0.2935475 | 5.01E-05   | 0.18818779 | 0.01031035 |
| -0.0046335 | 0.95008809 | -0.0665401 | 0.36816966 | 0.29691453 | 4.06E-05   |
| -0.171688  | 0.01945167 | -0.1576988 | 0.03204652 | 0.14770577 | 0.0448117  |
| 0.08219978 | 0.26599048 | -0.0183012 | 0.8047094  | 0.33026793 | 4.41E-06   |
| 0.19873687 | 0.00668993 | 0.03706377 | 0.61645764 | 0.34273506 | 1.79E-06   |
| -0.1001999 | 0.17476648 | -0.2036683 | 0.00542555 | 0.23818224 | 0.00109547 |
| 0.00239123 | 0.97422973 | -0.1148658 | 0.11949127 | 0.05749445 | 0.43695111 |
| 0.12780343 | 0.08298039 | 0.10460413 | 0.15647792 | -0.3012304 | 3.09E-05   |
| -0.2005977 | 0.00618486 | -0.2925088 | 5.34E-05   | 0.36373444 | 3.60E-07   |
| -0.3460877 | 1.40E-06   | -0.324315  | 6.68E-06   | 0.02844327 | 0.70073689 |
| 0.1129657  | 0.12577179 | 0.10754759 | 0.14508317 | 0.24515786 | 0.00076994 |
| -0.1944723 | 0.00798851 | -0.0987841 | 0.18096938 | 0.40056916 | 1.61E-08   |
| 0.08219617 | 0.26601155 | -0.0320224 | 0.66522476 | 0.29428461 | 4.78E-05   |
| -0.1978195 | 0.00695221 | -0.1370983 | 0.06275876 | 0.01223341 | 0.86873091 |
| -0.0441456 | 0.55073037 | -0.1239939 | 0.09265354 | -0.3034843 | 2.68E-05   |
| 0.0675246  | 0.36111015 | -0.0496092 | 0.50247721 | 0.06490605 | 0.38007388 |
| -0.0363758 | 0.6230205  | -0.2035083 | 0.00546296 | 0.24064022 | 0.00096858 |
| 0.02223171 | 0.76389379 | -0.0777442 | 0.29286338 | 0.20161234 | 0.00592407 |
| -0.2337174 | 0.00136564 | -0.3059257 | 2.29E-05   | 0.26474632 | 0.00027081 |
| 0.00052828 | 0.99430577 | -0.0747853 | 0.31167547 | 0.09509926 | 0.19787027 |
| 0.01428634 | 0.84695267 | 0.04281188 | 0.56284346 | -0.2400839 | 0.00099606 |
| -0.0904137 | 0.22097785 | -0.1384977 | 0.0600979  | 0.24879399 | 0.00063809 |
| 0.04822384 | 0.51449872 | 0.02770603 | 0.70813618 | -0.5826125 | 3.33E-18   |
| 0.23115632 | 0.00154687 | 0.04726496 | 0.52290569 | -0.0772477 | 0.29596609 |
| 0.2256548  | 0.00201259 | 0.13067226 | 0.0762456  | 0.07770152 | 0.29312909 |
| -0.0897622 | 0.22433659 | -0.0891759 | 0.22739011 | -0.3877545 | 4.95E-08   |
| -0.2308658 | 0.00156877 | -0.2763039 | 0.00014063 | 0.08539171 | 0.24780683 |
| -0.0475312 | 0.52056484 | -0.0041173 | 0.95564328 | -0.0296998 | 0.68819089 |
| 0.11744299 | 0.1113656  | 0.17527164 | 0.01701904 | 0.21466606 | 0.00334334 |
| -0.1368851 | 0.06317259 | 0.06059532 | 0.41258535 | -0.3390579 | 2.35E-06   |
| 0.08104163 | 0.27280798 | 0.01462703 | 0.84334919 | -0.5654852 | 5.02E-17   |
| 0.18724922 | 0.01070397 | 0.00553848 | 0.94035673 | 0.00757226 | 0.91852074 |
| -0.0583369 | 0.43025137 | -0.2377917 | 0.00111698 | -0.1206514 | 0.10186153 |
| -0.0950456 | 0.1981247  | -0.1091988 | 0.13897305 | 0.25922624 | 0.00036655 |

|            |            |            |            |            |            |
|------------|------------|------------|------------|------------|------------|
| 0.18076576 | 0.01380357 | 0.07375288 | 0.31842102 | 0.18999961 | 0.00958649 |
| -0.0746298 | 0.3126855  | -0.0200725 | 0.7862433  | -0.0455805 | 0.53784204 |
| -0.1585485 | 0.0311204  | 0.01040084 | 0.88825572 | -0.3558234 | 6.68E-07   |
| -0.0639454 | 0.38718046 | -0.1063923 | 0.14947781 | -0.0034498 | 0.96282862 |
| 0.03478611 | 0.63829952 | -0.0989724 | 0.18013496 | -0.0305624 | 0.67962698 |
| -0.045317  | 0.54019688 | 0.27452937 | 0.00015582 | -0.3045092 | 2.51E-05   |
| -0.0116917 | 0.8744946  | 0.14472062 | 0.04936439 | -0.3099126 | 1.76E-05   |
| -0.2890116 | 6.61E-05   | -0.1828538 | 0.01272894 | -0.2655881 | 0.00025844 |
| -0.1468248 | 0.04611723 | -0.0763553 | 0.30159703 | 0.01585151 | 0.83042539 |
| -0.0406527 | 0.58271956 | 0.14818223 | 0.0441186  | -0.3570753 | 6.06E-07   |
| -0.2425622 | 0.00087893 | -0.0869337 | 0.23933862 | -0.1884206 | 0.0102147  |
| 0.07794042 | 0.291643   | -0.0406914 | 0.58236094 | -0.022977  | 0.75622363 |
| -0.1840589 | 0.01214279 | -0.142231  | 0.05344977 | 0.21372877 | 0.00348739 |
| -0.1547477 | 0.03544681 | -0.1209237 | 0.10108538 | -0.2954639 | 4.45E-05   |
| -0.1237299 | 0.09335572 | -0.2603147 | 0.00034549 | 0.04242672 | 0.56636525 |
| -0.1423284 | 0.05328499 | 0.02840535 | 0.70111683 | -0.2855738 | 8.14E-05   |
| -0.1867281 | 0.01092818 | -0.2244263 | 0.00213264 | -0.0169282 | 0.81909898 |
| -0.2038769 | 0.00537713 | -0.2279473 | 0.00180488 | 0.40890462 | 7.53E-09   |
| -0.0704219 | 0.34082691 | -0.115032  | 0.11895392 | 0.10366554 | 0.16024939 |
| 0.03534399 | 0.6329198  | -0.0676338 | 0.36033208 | -0.0212471 | 0.77406181 |
| 0.02142925 | 0.77217807 | -0.0146466 | 0.84314183 | -0.1729504 | 0.01856242 |
| -0.3981113 | 2.00E-08   | -0.3504249 | 1.01E-06   | 0.38790687 | 4.88E-08   |
| -0.1033759 | 0.16142693 | -0.1436352 | 0.05111247 | 0.36182258 | 4.18E-07   |
| -0.2383672 | 0.00108541 | -0.0848702 | 0.25071738 | 0.07957961 | 0.28158212 |
| -0.1650259 | 0.02478133 | -0.3028869 | 2.78E-05   | 0.19020522 | 0.00950726 |
| 0.04311367 | 0.56009142 | 0.02947368 | 0.69044242 | 0.18419268 | 0.01207918 |
| -0.2261175 | 0.00196899 | -0.1691736 | 0.02133334 | 0.31753664 | 1.06E-05   |
| 0.0563793  | 0.44591055 | -0.0735712 | 0.3196178  | 0.36575903 | 3.06E-07   |
| -0.1635207 | 0.02614584 | -0.1860479 | 0.01122709 | -0.2327817 | 0.00142947 |
| 0.125318   | 0.08919432 | 0.04202907 | 0.57001211 | 0.18660464 | 0.01098191 |
| -0.3386445 | 2.42E-06   | -0.2071552 | 0.00466538 | -0.0392078 | 0.59620023 |
| -0.3249673 | 6.39E-06   | -0.2645968 | 0.00027306 | 0.26987556 | 0.00020321 |
| -0.1958623 | 0.00754256 | -0.2222369 | 0.00236285 | -0.3119475 | 1.54E-05   |
| -0.2731099 | 0.00016905 | -0.4051379 | 1.06E-08   | 0.27738312 | 0.00013209 |
| 0.01724274 | 0.81579686 | 0.11183968 | 0.12961224 | 0.18824079 | 0.01028851 |
| -0.1238656 | 0.0929941  | -0.0091322 | 0.90181221 | -0.1412943 | 0.05505773 |
| 0.08855475 | 0.23065724 | -0.0295235 | 0.68994633 | 0.1828953  | 0.01270836 |
| 0.0558591  | 0.45012525 | 0.02005893 | 0.78638414 | -0.231312  | 0.00153526 |
| -0.2550507 | 0.00045888 | -0.242499  | 0.00088175 | 0.07662404 | 0.29989405 |
| 0.07037206 | 0.34116968 | -0.0256759 | 0.72865161 | 0.18655051 | 0.01100554 |
| -0.0492633 | 0.5054648  | -0.1473129 | 0.04539002 | 0.31859987 | 9.88E-06   |
| -0.0026294 | 0.97166432 | -0.0898785 | 0.2237342  | 0.19256118 | 0.00863984 |
| 0.14953155 | 0.04220431 | 0.00543834 | 0.94143327 | 0.18198654 | 0.01316603 |
| -0.2915772 | 5.65E-05   | -0.3545027 | 7.39E-07   | 0.13710493 | 0.06274599 |
| -0.0308401 | 0.67687807 | -0.1353758 | 0.06616608 | 0.12401769 | 0.09259035 |
| 0.18922691 | 0.00988952 | 0.2394608  | 0.00102768 | -0.3001126 | 3.32E-05   |

|            |            |            |            |            |            |
|------------|------------|------------|------------|------------|------------|
| 0.11032036 | 0.13493647 | 0.10644927 | 0.14925892 | -0.26296   | 0.0002989  |
| 0.06424608 | 0.38494754 | 0.01192605 | 0.87200042 | -0.3174285 | 1.07E-05   |
| -0.0279688 | 0.70549532 | -0.037839  | 0.60909796 | 0.31988675 | 9.05E-06   |
| -0.1433983 | 0.05150069 | -0.1973183 | 0.00709932 | 0.05635334 | 0.44612039 |
| 0.1817623  | 0.01328117 | 0.34640967 | 1.36E-06   | -0.4856721 | 2.43E-12   |
| 0.01358014 | 0.85443211 | -0.1166889 | 0.11369726 | 0.03406274 | 0.64530319 |
| -0.0125541 | 0.86532184 | -0.0502724 | 0.49677389 | -0.2713508 | 0.0001869  |
| -0.0410996 | 0.57857902 | -0.0655648 | 0.37524676 | -0.1570967 | 0.03271685 |
| 0.02408612 | 0.74485306 | 0.08773556 | 0.23501631 | -0.3325158 | 3.76E-06   |
| -0.188083  | 0.01035367 | -0.2869441 | 7.49E-05   | 0.22571704 | 0.00200668 |
| -0.090361  | 0.22124793 | -0.0318026 | 0.66738547 | 0.1230106  | 0.09529069 |
| -0.2976324 | 3.88E-05   | -0.0583004 | 0.4305406  | 0.37264922 | 1.75E-07   |
| -0.4263131 | 1.44E-09   | -0.2301021 | 0.00162766 | 0.09510584 | 0.19783906 |
| -0.1537093 | 0.03671382 | -0.2590453 | 0.00037017 | 0.08081907 | 0.2741315  |
| -0.0960013 | 0.19363098 | 0.00448614 | 0.95167398 | -0.2230073 | 0.00227939 |
| 0.03433979 | 0.64261708 | 0.09206409 | 0.21262916 | -0.2138788 | 0.00346396 |
| -0.1634197 | 0.02623962 | -0.2022577 | 0.00576334 | 0.15250879 | 0.03822601 |
| -0.0574922 | 0.43696886 | -0.1349187 | 0.06709529 | 0.18908276 | 0.00994697 |
| -0.20147   | 0.00596005 | -0.2410332 | 0.00094959 | 0.03786183 | 0.60888222 |
| 0.20312561 | 0.00555335 | 0.00435639 | 0.95307001 | 0.11477375 | 0.11978986 |
| -0.0856512 | 0.24636739 | -0.1584138 | 0.03126566 | 0.34445428 | 1.58E-06   |
| 0.13237042 | 0.07247203 | 0.12831546 | 0.08174449 | 0.24361857 | 0.00083296 |
| -0.1804696 | 0.01396228 | -0.0001917 | 0.99793422 | -0.2758557 | 0.00014433 |
| -0.2872323 | 7.37E-05   | -0.2660625 | 0.00025171 | 0.22018702 | 0.00259859 |
| 0.28991087 | 6.26E-05   | 0.1909455  | 0.00922675 | -0.2454542 | 0.00075832 |
| 0.06575761 | 0.37384132 | 0.04327918 | 0.55858479 | -0.1102995 | 0.13501063 |
| 0.05099386 | 0.49060989 | 0.02011811 | 0.78576906 | 0.47033354 | 1.43E-11   |
| -0.0434402 | 0.55712107 | -0.136918  | 0.06310855 | -0.081353  | 0.27096353 |
| -0.2145178 | 0.00336576 | -0.1334791 | 0.07009119 | 0.04004306 | 0.58839036 |
| -0.1192837 | 0.10583166 | -0.1572721 | 0.03252035 | 0.18644085 | 0.01105354 |
| 0.11811659 | 0.10931475 | 0.25363609 | 0.00049475 | -0.1498456 | 0.04176886 |
| -0.1841308 | 0.01210857 | -0.2411843 | 0.00094238 | 0.07625886 | 0.30221006 |
| 0.2362205  | 0.00120749 | 0.1178982  | 0.10997639 | 0.15725176 | 0.03254304 |
| -0.1657584 | 0.02413966 | -0.1745857 | 0.01746307 | 0.10551981 | 0.15286321 |
| 0.07983826 | 0.28001616 | 0.1628193  | 0.02680337 | -0.3170741 | 1.10E-05   |
| -0.0404799 | 0.58432494 | -0.0458147 | 0.53575191 | -0.2225456 | 0.00232907 |
| -0.3674306 | 2.68E-07   | -0.3433583 | 1.71E-06   | 0.06123568 | 0.40765496 |
| 0.13378648 | 0.06944254 | 0.05651107 | 0.44484653 | -0.4877854 | 1.89E-12   |
| 0.52410574 | 1.92E-14   | 0.35413092 | 7.60E-07   | -0.2170781 | 0.00299701 |
| -0.0544948 | 0.46128426 | -0.101721  | 0.16827919 | 0.19123695 | 0.00911834 |
| 0.23012535 | 0.00162584 | 0.16840695 | 0.02193753 | -0.3699587 | 2.18E-07   |
| 0.07479136 | 0.31163589 | 0.06908814 | 0.3500727  | -0.2777595 | 0.00012923 |
| 0.34908514 | 1.12E-06   | 0.19939172 | 0.00650815 | 0.25737106 | 0.00040521 |
| 0.13848099 | 0.06012904 | 0.27501972 | 0.00015147 | -0.1520468 | 0.0388218  |
| 0.2447763  | 0.00078514 | 0.12267021 | 0.09621739 | -0.252067  | 0.00053756 |
| -0.0885647 | 0.23060462 | -0.2471358 | 0.00069539 | 0.2431915  | 0.00085127 |

|            |            |            |            |            |            |
|------------|------------|------------|------------|------------|------------|
| 0.10814165 | 0.14286186 | 0.02849298 | 0.70023901 | -0.4014244 | 1.49E-08   |
| -0.424859  | 1.66E-09   | -0.2433673 | 0.00084369 | -0.0120365 | 0.87082497 |
| 0.48323546 | 3.24E-12   | 0.35566617 | 6.76E-07   | -0.2384626 | 0.00108026 |
| -0.0059061 | 0.93640635 | 0.07564636 | 0.30612106 | -0.361045  | 4.45E-07   |
| -0.1313832 | 0.0746468  | -0.129059  | 0.07997629 | 0.32115888 | 8.30E-06   |
| 0.0933599  | 0.20623445 | 0.04715354 | 0.52388701 | -0.2489127 | 0.00063416 |
| 0.01550847 | 0.83404163 | -0.1396763 | 0.05792924 | -0.1801728 | 0.01412286 |
| 0.25960291 | 0.00035913 | 0.06945346 | 0.34752472 | 0.0565296  | 0.44469704 |
| 0.04197147 | 0.57054129 | -0.0519146 | 0.48280243 | 0.22254229 | 0.00232943 |
| -0.0775659 | 0.2939747  | -0.1257047 | 0.08820382 | 0.45439545 | 8.20E-11   |
| -0.1321514 | 0.07294994 | -0.0929071 | 0.20845302 | 0.19200308 | 0.00883872 |
| 0.24830827 | 0.00065441 | 0.17981722 | 0.01431744 | 0.27329329 | 0.00016728 |
| -0.2161393 | 0.00312775 | -0.1693767 | 0.02117573 | 0.28957016 | 6.39E-05   |
| 0.11004703 | 0.13591184 | 0.29139507 | 5.72E-05   | 0.15887662 | 0.03076897 |
| -0.1774612 | 0.01566684 | -0.1368024 | 0.06333362 | 0.28918571 | 6.54E-05   |
| -0.1262418 | 0.08684273 | -0.171163  | 0.01983224 | 0.28074092 | 0.0001085  |
| 0.10124702 | 0.17028114 | 0.24770984 | 0.00067504 | 0.20368888 | 0.00542076 |
| -0.2359753 | 0.0012222  | -0.1147127 | 0.11998818 | -0.4457779 | 2.03E-10   |
| -0.0234431 | 0.75143875 | -0.0316676 | 0.66871428 | -0.0096535 | 0.89623825 |
| -0.0698141 | 0.34502065 | 0.10730437 | 0.14600012 | -0.278072  | 0.00012689 |
| 0.2276354  | 0.00183194 | 0.10803694 | 0.14325152 | -0.2574417 | 0.00040367 |
| 0.12639847 | 0.08644876 | 0.03054906 | 0.67975888 | 0.18708729 | 0.0107732  |
| -0.4668994 | 2.10E-11   | -0.4260147 | 1.49E-09   | 0.32754909 | 5.34E-06   |
| 0.17874739 | 0.01491703 | 0.07170155 | 0.33210362 | 0.22003911 | 0.0026164  |
| -0.0210207 | 0.77640548 | -0.1334496 | 0.07015368 | 0.36877243 | 2.40E-07   |
| -0.1179552 | 0.10980351 | -0.1471608 | 0.04561562 | 0.18953385 | 0.00976815 |
| -0.3042656 | 2.55E-05   | 0.01541726 | 0.8350037  | -0.4452728 | 2.14E-10   |
| -0.0203186 | 0.78368686 | -0.1038507 | 0.15949988 | 0.27923772 | 0.00011853 |
| 0.10780758 | 0.14410783 | -0.0144562 | 0.84515516 | 0.18450268 | 0.01193295 |
| 0.06646209 | 0.36873291 | 0.03349057 | 0.65086519 | -0.1788069 | 0.01488311 |
| 0.25105992 | 0.00056682 | 0.17198891 | 0.01923642 | 0.26748564 | 0.00023247 |
| -0.1022279 | 0.16615782 | -0.1364389 | 0.06404578 | -0.3690187 | 2.36E-07   |
| 0.14216535 | 0.05356126 | 0.22938117 | 0.0016851  | -0.3032984 | 2.71E-05   |
| -0.0994062 | 0.17822394 | -0.1240355 | 0.09254327 | 0.09274302 | 0.20926119 |
| -0.1537877 | 0.03661687 | -0.0947379 | 0.19958738 | -0.2051068 | 0.00509944 |
| 0.06491051 | 0.38004111 | 0.04075767 | 0.58174622 | -0.2635007 | 0.00029012 |
| -0.110769  | 0.13334702 | -0.1883727 | 0.01023432 | 0.17829124 | 0.01517928 |
| -0.3027205 | 2.81E-05   | -0.1275082 | 0.08369966 | -0.2517223 | 0.00054741 |
| 0.1867198  | 0.01093179 | 0.06666064 | 0.3673009  | 0.2277611  | 0.00182099 |
| -0.0268154 | 0.71711116 | 0.01575788 | 0.83141213 | -0.2615543 | 0.00032288 |
| -0.0693345 | 0.34835337 | 0.02111813 | 0.77539697 | -0.0919158 | 0.21336972 |
| 0.01965688 | 0.79056575 | 0.07066761 | 0.33914079 | 0.04215925 | 0.568817   |
| -0.0055411 | 0.94032832 | -0.0070461 | 0.92416528 | -0.2941469 | 4.82E-05   |
| -0.2968505 | 4.08E-05   | -0.14279   | 0.05250896 | -0.0907669 | 0.21917156 |
| 0.14274701 | 0.05258081 | 0.0084736  | 0.90886184 | -0.0107252 | 0.8847948  |
| -0.1563619 | 0.03355087 | -0.1850472 | 0.01167986 | 0.14793469 | 0.04447757 |

|            |            |            |            |            |            |
|------------|------------|------------|------------|------------|------------|
| -0.0719852 | 0.33018975 | -0.0665449 | 0.36813516 | -0.2023819 | 0.00573288 |
| 0.02187814 | 0.76754063 | 0.05144133 | 0.48680715 | 0.04367969 | 0.55494728 |
| 0.16578332 | 0.02411811 | 0.13165477 | 0.07404341 | 0.27009796 | 0.00020067 |
| -0.1314394 | 0.07452175 | -0.0789652 | 0.28532565 | -0.2433398 | 0.00084487 |
| -0.2575637 | 0.00040103 | -0.0525978 | 0.47705288 | -0.0504106 | 0.49559007 |
| -0.2908201 | 5.92E-05   | -0.1159715 | 0.11595027 | -0.233479  | 0.00138165 |
| 0.0083329  | 0.91036871 | -0.0782339 | 0.28982453 | 0.09952451 | 0.17770552 |
| -0.0153976 | 0.83521061 | -0.0806474 | 0.27515537 | -0.0400036 | 0.58875793 |
| -0.3053917 | 2.37E-05   | -0.2035107 | 0.00546238 | 0.40262485 | 1.34E-08   |
| 0.04547422 | 0.53879113 | -0.0750384 | 0.31003589 | -0.0627593 | 0.39606459 |
| -0.0326395 | 0.65917408 | -0.1330303 | 0.07104728 | 0.25400589 | 0.00048513 |
| -0.001679  | 0.98190348 | 0.00770616 | 0.91708501 | 0.18061414 | 0.01388461 |
| -0.2041496 | 0.00531441 | -0.0527084 | 0.47612502 | -0.0061624 | 0.93365237 |
| 0.20743146 | 0.00460944 | -0.1115878 | 0.1304837  | -0.1893614 | 0.00983616 |
| 0.00379455 | 0.95911686 | -0.1834363 | 0.01244257 | 0.10475417 | 0.15588129 |
| -0.0369717 | 0.61733415 | -0.0347594 | 0.63855739 | -0.0821001 | 0.26657239 |
| -0.0491548 | 0.5064041  | 0.07087505 | 0.33772136 | 0.05852612 | 0.42875468 |
| 0.19539061 | 0.00769136 | 0.15776602 | 0.03197238 | -0.1958258 | 0.00755399 |
| 0.07121611 | 0.33539587 | -0.1402042 | 0.0569791  | -0.3201391 | 8.90E-06   |
| -0.3326419 | 3.72E-06   | -0.1259051 | 0.08769405 | -0.0426903 | 0.56395449 |
| 0.03840409 | 0.60375853 | 0.05062449 | 0.4937608  | -0.4283428 | 1.18E-09   |
| -0.4229136 | 2.01E-09   | -0.2898022 | 6.30E-05   | -0.0537946 | 0.46707056 |
| 0.2333143  | 0.00139281 | 0.12147524 | 0.09952746 | -0.0740012 | 0.31678986 |
| -0.3093382 | 1.83E-05   | -0.2058634 | 0.00493507 | 0.19540809 | 0.0076858  |
| 0.15710315 | 0.03270955 | 0.00100432 | 0.98917493 | -0.1798583 | 0.01429482 |
| -0.1323811 | 0.07244869 | -0.0352896 | 0.6334434  | -0.3709914 | 2.01E-07   |
| 0.24855658 | 0.00064602 | -0.0980509 | 0.18424467 | -0.077954  | 0.29155844 |
| -0.1143887 | 0.12104492 | -0.1632641 | 0.02638475 | 0.09706523 | 0.18871589 |
| 0.22536374 | 0.00204046 | 0.12036997 | 0.10266866 | -0.2797311 | 0.00011515 |
| -0.4564259 | 6.60E-11   | -0.2487997 | 0.0006379  | 0.11422863 | 0.12156965 |
| 0.13585381 | 0.06520571 | 0.01528951 | 0.83635165 | 0.20604355 | 0.00489663 |
| -0.0284333 | 0.70083725 | -0.0390973 | 0.59723647 | 0.17114027 | 0.01984885 |
| -0.241801  | 0.00091348 | -0.2766195 | 0.00013808 | 0.12367085 | 0.09351337 |
| -0.0611404 | 0.40838653 | -0.0878864 | 0.2342094  | 0.02958291 | 0.68935438 |
| -0.3577445 | 5.75E-07   | -0.1476114 | 0.04494998 | 0.03389142 | 0.64696654 |
| -0.0461559 | 0.53271607 | -0.0884269 | 0.23133368 | 0.2726378  | 0.00017367 |
| 0.27885168 | 0.00012124 | 0.2206446  | 0.00254419 | -0.1574841 | 0.03228421 |
| -0.1232766 | 0.09457149 | 0.07865777 | 0.28721102 | -0.0158345 | 0.83060438 |
| -0.0990896 | 0.17961721 | -0.2229774 | 0.00228257 | 0.08758432 | 0.2358274  |
| 0.25033973 | 0.00058863 | -0.0037462 | 0.95963752 | -0.338071  | 2.52E-06   |
| -0.0773069 | 0.29559459 | -0.0185733 | 0.80186507 | 0.03359398 | 0.64985855 |
| -0.0639398 | 0.38722228 | -0.0925486 | 0.21022174 | -0.2780752 | 0.00012687 |
| -0.0947013 | 0.1997617  | -0.2426045 | 0.00087704 | -0.5769694 | 8.28E-18   |
| -0.1058196 | 0.15169371 | -0.167192  | 0.02292517 | 0.17537019 | 0.01695606 |
| 0.14776825 | 0.04472028 | 0.18529369 | 0.01156688 | -0.258926  | 0.00037257 |
| 0.05790707 | 0.4336622  | -0.0559115 | 0.44969955 | 0.20273608 | 0.00564674 |



|            |            |            |            |            |            |
|------------|------------|------------|------------|------------|------------|
| 0.39890521 | 1.86E-08   | 0.17317259 | 0.01840959 | 0.00460603 | 0.95038408 |
| -0.2219836 | 0.00239088 | -0.2715083 | 0.00018523 | 0.13229327 | 0.07264012 |
| 0.00340249 | 0.96333785 | 0.05301611 | 0.47355071 | -0.2328587 | 0.00142412 |
| 0.09276509 | 0.20915234 | 0.02272956 | 0.75876748 | 0.17338134 | 0.01826702 |
| -0.1769738 | 0.01595942 | -0.1492935 | 0.0425369  | -0.1174318 | 0.11139993 |
| 0.11706502 | 0.11252951 | -0.0862894 | 0.24285204 | 0.06272972 | 0.39628806 |
| 0.10491251 | 0.15525347 | 0.02402314 | 0.7454973  | 0.32981694 | 4.55E-06   |
| 0.5433833  | 1.33E-15   | 0.16918964 | 0.02132089 | -0.255824  | 0.0004403  |
| -0.2439244 | 0.00082008 | -0.3195855 | 9.24E-06   | 0.13951297 | 0.05822591 |
| -0.05229   | 0.47963854 | 0.03018765 | 0.68334233 | -0.1207705 | 0.10152132 |
| -0.2498883 | 0.0006027  | -0.3020132 | 2.94E-05   | -0.0471621 | 0.52381176 |
| -0.1366326 | 0.06366546 | 0.01440047 | 0.84574516 | -0.0313251 | 0.67208838 |
| 0.12225207 | 0.09736558 | -0.0034178 | 0.96317318 | 0.25088213 | 0.00057213 |
| -0.1510365 | 0.04015189 | -0.1742077 | 0.01771203 | -0.4884145 | 1.76E-12   |
| -0.0080228 | 0.91369096 | -0.1755755 | 0.01682549 | 0.06928748 | 0.34868094 |
| 0.05848372 | 0.42908976 | -0.0287705 | 0.69746204 | 0.14355309 | 0.05124674 |
| -0.2699657 | 0.00020217 | -0.2458148 | 0.0007444  | 0.14072604 | 0.05605257 |
| 0.35381246 | 7.79E-07   | 0.1962694  | 0.00741623 | -0.0849286 | 0.25038994 |
| -0.3877401 | 4.95E-08   | -0.3465557 | 1.35E-06   | 0.14153703 | 0.0546373  |
| 0.14078092 | 0.05595586 | 0.05405762 | 0.46489261 | 0.19100888 | 0.00920308 |
| -0.2417077 | 0.0009178  | -0.2383559 | 0.00108603 | -0.0517254 | 0.48440091 |
| -0.0565367 | 0.44463945 | -0.0136512 | 0.85367871 | 0.16632498 | 0.02365325 |
| 0.00134442 | 0.98550947 | 0.01137977 | 0.87781674 | 0.38379406 | 6.94E-08   |
| -0.0751907 | 0.30905195 | -0.1344311 | 0.06809801 | 0.0465543  | 0.52918118 |
| -0.2473488 | 0.00068778 | -0.3389707 | 2.36E-06   | 0.35900729 | 5.21E-07   |
| -0.0367888 | 0.61907763 | -0.0201645 | 0.78528727 | -0.3259165 | 5.98E-06   |
| -0.2515881 | 0.0005513  | -0.2287163 | 0.00173971 | 0.22140234 | 0.00245638 |
| 0.10723819 | 0.14625042 | 0.01612351 | 0.82756062 | 0.29062413 | 5.99E-05   |
| 0.26379475 | 0.00028545 | 0.0343909  | 0.64212208 | 0.04472739 | 0.54548632 |
| -0.2185044 | 0.00280784 | -0.0682351 | 0.35606771 | -0.1926945 | 0.00859291 |
| 0.22516567 | 0.00205963 | 0.01077062 | 0.88431014 | 0.31473403 | 1.28E-05   |
| 0.04203851 | 0.56992547 | -0.0318512 | 0.66690715 | -0.0655364 | 0.37545395 |
| -0.0210225 | 0.77638765 | 0.04753751 | 0.520509   | 0.23912117 | 0.0010453  |
| 0.24625729 | 0.00072764 | 0.13736551 | 0.06224339 | 0.23012279 | 0.00162604 |
| -0.1753929 | 0.01694155 | -0.1244241 | 0.09151797 | -0.3169706 | 1.10E-05   |
| -0.3292936 | 4.72E-06   | -0.1081336 | 0.14289188 | 0.31692838 | 1.11E-05   |
| 0.37081072 | 2.04E-07   | 0.04434063 | 0.54896959 | 0.16309302 | 0.02654511 |
| 0.22771548 | 0.00182496 | -0.0227368 | 0.7586927  | 0.26882265 | 0.00021565 |
| -0.046984  | 0.52538202 | 0.14919067 | 0.04268121 | -0.1954024 | 0.00768761 |
| -0.1107741 | 0.1333292  | -0.1598132 | 0.02978426 | -0.3394685 | 2.28E-06   |
| -0.1129908 | 0.12568735 | -0.0489377 | 0.50828573 | -0.4313391 | 8.81E-10   |
| -0.1378457 | 0.06132579 | 0.07766812 | 0.29333723 | -0.1123451 | 0.12787742 |
| -0.0851546 | 0.24912737 | -0.048333  | 0.51354636 | 0.13675238 | 0.06343129 |
| -0.1388823 | 0.05938293 | -0.1504437 | 0.04095009 | 0.24863507 | 0.00064339 |
| 0.10049585 | 0.17349001 | -0.0083467 | 0.91022123 | 0.28771575 | 7.15E-05   |
| 0.0137525  | 0.85260543 | -0.0174559 | 0.81356093 | 0.35700803 | 6.09E-07   |

|            |            |            |            |            |            |
|------------|------------|------------|------------|------------|------------|
| -0.0536765 | 0.46805066 | -0.0206137 | 0.7806243  | 0.28870893 | 6.74E-05   |
| 0.14100239 | 0.05556695 | 0.10647258 | 0.14916937 | 0.15830043 | 0.0313884  |
| 0.12618659 | 0.08698175 | -0.0112748 | 0.87893466 | 0.21467639 | 0.00334178 |
| 0.04851838 | 0.51193037 | -0.1009365 | 0.17160216 | -0.0822975 | 0.26542065 |
| 0.04286573 | 0.56235197 | -0.0831164 | 0.26067807 | 0.13504727 | 0.06683279 |
| -0.0871762 | 0.238026   | -0.1225355 | 0.09658606 | 0.18388159 | 0.0122275  |
| 0.03294712 | 0.656166   | 0.063365   | 0.3915128  | 0.33266757 | 3.72E-06   |
| -0.0510787 | 0.48988802 | -0.104109  | 0.15845902 | 0.25788904 | 0.00039405 |
| -0.1021287 | 0.16657141 | -0.1505073 | 0.04086391 | 0.36451023 | 3.38E-07   |
| -0.0013429 | 0.9855257  | -0.0693985 | 0.34790736 | 0.16796649 | 0.02229127 |
| -0.1846583 | 0.01186012 | -0.1488057 | 0.04322521 | -0.0274604 | 0.71060744 |
| 0.15016331 | 0.04133227 | 0.21224409 | 0.00372706 | -0.184839  | 0.01177609 |
| -0.3097323 | 1.78E-05   | -0.2064012 | 0.00482114 | 0.04571952 | 0.53660096 |
| -0.2115852 | 0.0038381  | -0.2516917 | 0.0005483  | 0.24427704 | 0.00080544 |
| -0.192321  | 0.00872496 | -0.2089385 | 0.00431482 | 0.08989186 | 0.22366528 |
| 0.205253   | 0.0050673  | -0.071713  | 0.3320261  | 0.0355401  | 0.63103332 |
| 0.09843952 | 0.18250316 | 0.05237313 | 0.47893938 | -0.0173557 | 0.81461208 |
| -0.216859  | 0.00302707 | -0.2870175 | 7.46E-05   | -0.5401494 | 2.11E-15   |
| 0.21549444 | 0.00322052 | -0.0360118 | 0.62650528 | 0.07283196 | 0.32451771 |
| 0.03742385 | 0.6130346  | 0.01105622 | 0.88126471 | 0.22943111 | 0.00168106 |
| 0.0254087  | 0.73136624 | -0.0850551 | 0.24968277 | -0.1515353 | 0.03949056 |
| -0.0261816 | 0.72352264 | 0.07960483 | 0.28142917 | -0.2753018 | 0.00014903 |
| 0.21743459 | 0.00294868 | 0.20395111 | 0.00536    | -0.2603575 | 0.00034469 |
| 0.49482317 | 8.10E-13   | 0.32053749 | 8.66E-06   | -0.3665328 | 2.88E-07   |
| -0.3150934 | 1.25E-05   | -0.2597866 | 0.00035557 | 0.35355055 | 7.95E-07   |
| -0.3782421 | 1.11E-07   | -0.1785684 | 0.01501947 | 0.38927556 | 4.34E-08   |
| 0.14682429 | 0.04611797 | 0.12274762 | 0.09600603 | -0.2910808 | 5.83E-05   |
| 0.09141969 | 0.21586157 | 0.00093222 | 0.98995203 | -0.0969244 | 0.18936106 |
| -0.0260636 | 0.7247181  | 0.01401706 | 0.84980306 | -0.2109245 | 0.00395243 |
| -0.0098405 | 0.89424018 | -0.0447425 | 0.54535029 | -0.201869  | 0.00585968 |
| -0.1593689 | 0.03024796 | -0.1835165 | 0.01240357 | -0.3357577 | 2.98E-06   |
| -0.0014761 | 0.98409081 | 0.14632309 | 0.04687478 | -0.0147612 | 0.84193067 |
| 0.11676092 | 0.11347281 | 0.05007746 | 0.49844694 | -0.0030619 | 0.9670054  |
| -0.0713337 | 0.3345966  | -0.0127635 | 0.86309709 | -0.0253463 | 0.73200074 |
| -0.3316929 | 3.98E-06   | -0.1602294 | 0.02935544 | -0.355001  | 7.11E-07   |
| 0.06221323 | 0.40019593 | 0.1547007  | 0.03550339 | -0.3629459 | 3.83E-07   |
| -0.1176953 | 0.11059405 | -0.2484024 | 0.00065122 | 0.18388869 | 0.01222409 |
| -0.1617671 | 0.02781636 | -0.2099712 | 0.00412281 | 0.16371344 | 0.02596758 |
| 0.0014669  | 0.98418958 | -0.0615087 | 0.40556319 | 0.02198373 | 0.76645105 |
| -0.0499777 | 0.49930441 | -0.1026421 | 0.16443891 | 0.30780363 | 2.02E-05   |
| -0.012131  | 0.86982041 | -0.1012961 | 0.17007296 | 0.23397626 | 0.00134845 |
| -0.2098132 | 0.00415169 | -0.2799683 | 0.00011355 | 0.31669378 | 1.12E-05   |
| 0.12088463 | 0.10119641 | 0.03192617 | 0.66617056 | 0.18509727 | 0.01165685 |
| -0.0875487 | 0.23601882 | -0.061536  | 0.40535457 | 0.12471128 | 0.09076628 |
| 0.0862437  | 0.24310269 | -0.0416683 | 0.57332997 | 0.20132771 | 0.00599622 |
| -0.1210351 | 0.10076907 | -0.2333343 | 0.00139145 | 0.28329309 | 9.33E-05   |

|            |            |            |            |            |            |
|------------|------------|------------|------------|------------|------------|
| -0.109755  | 0.13695985 | -0.258388  | 0.00038358 | 0.12830251 | 0.08177558 |
| -0.1178438 | 0.11014156 | -0.181254  | 0.01354542 | 0.2150754  | 0.00328213 |
| -0.3515294 | 9.28E-07   | -0.2643324 | 0.00027709 | 0.18492946 | 0.0117342  |
| 0.14091239 | 0.05572473 | 0.1419232  | 0.05397387 | -0.2393589 | 0.00103294 |
| -0.2446571 | 0.00078994 | -0.1667609 | 0.02328473 | -0.3915795 | 3.55E-08   |
| -0.1788221 | 0.01487444 | -0.1959257 | 0.00752279 | 0.28017138 | 0.0001122  |
| 0.24733467 | 0.00068828 | 0.07567274 | 0.30595194 | -0.1692796 | 0.02125098 |
| 0.15440133 | 0.03586527 | 0.0180176  | 0.80767651 | -0.2348688 | 0.00129068 |
| -0.000671  | 0.99276764 | -0.0281516 | 0.70366042 | 0.33649899 | 2.82E-06   |
| -0.0997196 | 0.17685267 | -0.0422745 | 0.56775957 | -0.2722778 | 0.00017728 |
| 0.38015357 | 9.43E-08   | 0.0417308  | 0.57275485 | -0.1293629 | 0.07926236 |
| 0.25384189 | 0.00048938 | 0.17811623 | 0.01528096 | -0.2883834 | 6.87E-05   |
| 0.23946541 | 0.00102744 | 0.11619867 | 0.11523315 | -0.2743548 | 0.00015739 |
| -0.2665675 | 0.00024472 | -0.1775604 | 0.01560785 | -0.3957265 | 2.47E-08   |
| -0.0696336 | 0.34627281 | 0.03186307 | 0.66679089 | -0.1721863 | 0.01909634 |
| -0.047521  | 0.5206543  | -0.0590543 | 0.42459273 | 0.08860368 | 0.23039874 |
| -0.3621641 | 4.07E-07   | -0.3155633 | 1.21E-05   | -0.2347656 | 0.00129724 |
| -0.3788531 | 1.05E-07   | -0.2651633 | 0.00026462 | 0.25844652 | 0.00038236 |
| -0.1875417 | 0.01057991 | -0.3097355 | 1.78E-05   | 0.27059116 | 0.00019514 |
| -0.2660133 | 0.0002524  | -0.2006727 | 0.00616525 | 0.22726694 | 0.00186439 |
| 0.12354319 | 0.09385494 | -0.1428966 | 0.05233114 | -0.2157029 | 0.00319027 |
| -0.1473171 | 0.04538385 | -0.1544669 | 0.0357858  | -0.3143908 | 1.31E-05   |
| -0.1802737 | 0.01406807 | -0.0452496 | 0.54080023 | -0.1454866 | 0.04816102 |
| -0.2098859 | 0.00413837 | -0.080473  | 0.27619813 | 0.01918042 | 0.79552913 |
| -0.1901694 | 0.00952103 | -0.2089889 | 0.00430526 | -0.1720464 | 0.0191955  |
| 0.44662875 | 1.86E-10   | 0.24093402 | 0.00095435 | -0.1869994 | 0.01081095 |
| 0.36770269 | 2.62E-07   | 0.2278549  | 0.00181286 | -0.0907277 | 0.21937153 |
| -0.1708378 | 0.02007118 | -0.0107723 | 0.88429198 | -0.0229504 | 0.75649712 |
| 0.12300596 | 0.09530328 | 0.19512892 | 0.00777503 | -0.1745558 | 0.01748262 |
| -0.3828687 | 7.50E-08   | -0.3936213 | 2.97E-08   | 0.19876497 | 0.00668204 |
| -0.0407781 | 0.58155638 | -0.2034057 | 0.00548706 | 0.13374565 | 0.06952842 |
| -0.0328863 | 0.65676033 | -0.1611261 | 0.0284493  | 0.2611971  | 0.00032925 |
| 0.00081813 | 0.99118166 | -0.0732837 | 0.321518   | 0.3473621  | 1.27E-06   |
| 0.16844012 | 0.02191109 | 0.21128389 | 0.00388987 | -0.251586  | 0.00055136 |
| 0.31500815 | 1.26E-05   | 0.15637982 | 0.03353037 | -0.1013708 | 0.16975659 |
| -0.0406578 | 0.58267223 | -0.1601909 | 0.02939493 | 0.22307674 | 0.002272   |
| -0.3673937 | 2.69E-07   | -0.3849035 | 6.31E-08   | 0.44483998 | 2.24E-10   |
| -0.0390719 | 0.59747489 | 0.10759653 | 0.14489917 | -0.2117361 | 0.00381242 |
| -0.2655162 | 0.00025948 | -0.272726  | 0.0001728  | -0.2390927 | 0.00104679 |
| -0.1601033 | 0.02948483 | -0.1079697 | 0.14350216 | -0.4024737 | 1.35E-08   |
| -0.3046964 | 2.48E-05   | -0.1386645 | 0.05978685 | -0.0546846 | 0.45972296 |
| 0.04307671 | 0.56042806 | 0.05941187 | 0.42178886 | -0.1825881 | 0.0128615  |
| -0.0410013 | 0.57948928 | -0.0904457 | 0.22081346 | 0.13226645 | 0.07269862 |
| 0.19473146 | 0.00790364 | 0.00586243 | 0.93687526 | 0.07670825 | 0.29936163 |
| -0.1985066 | 0.00675491 | -0.3048697 | 2.45E-05   | 0.21697094 | 0.00301168 |
| -0.317049  | 1.10E-05   | -0.207887  | 0.00451852 | 0.10859454 | 0.14118592 |

|            |            |            |            |            |            |
|------------|------------|------------|------------|------------|------------|
| -0.3869379 | 5.31E-08   | -0.2052713 | 0.00506329 | 0.00595211 | 0.93591158 |
| -0.2781703 | 0.00012617 | -0.1879629 | 0.01040347 | 0.2218012  | 0.00241126 |
| -0.1849239 | 0.01173676 | -0.196444  | 0.00736263 | 0.14788753 | 0.04454622 |
| -0.2035087 | 0.00546285 | -0.2997397 | 3.40E-05   | 0.36974895 | 2.22E-07   |
| -0.2429092 | 0.00086358 | -0.0256548 | 0.72886593 | -0.5108436 | 1.09E-13   |
| -0.1816399 | 0.01334436 | -0.1293503 | 0.07929188 | 0.28798061 | 7.04E-05   |
| -0.1345846 | 0.06778096 | -0.1367879 | 0.06336203 | -0.2162851 | 0.00310712 |
| -0.1318156 | 0.07368798 | -0.0733861 | 0.32084011 | -0.3118191 | 1.56E-05   |
| -0.0651284 | 0.37844012 | -0.0628887 | 0.39508999 | 0.16166269 | 0.0279186  |
| 0.26009557 | 0.00034964 | 0.41535509 | 4.13E-09   | -0.3890993 | 4.41E-08   |
| -0.156953  | 0.03287852 | -0.0678888 | 0.35851971 | -0.2702895 | 0.0001985  |
| 0.248182   | 0.00065871 | -0.0157102 | 0.83191458 | -0.5283562 | 1.08E-14   |
| -0.3479175 | 1.22E-06   | -0.3177253 | 1.05E-05   | 0.50392609 | 2.63E-13   |
| 0.05582436 | 0.45040754 | 0.16365652 | 0.02602012 | 0.17032132 | 0.02045579 |
| -0.1744333 | 0.01756305 | -0.273026  | 0.00016986 | 0.13102987 | 0.075438   |
| -0.1681561 | 0.02213843 | -0.2527288 | 0.00051911 | 0.0722871  | 0.32816001 |
| -0.1195578 | 0.10502644 | -0.0957072 | 0.19500586 | -0.2145527 | 0.00336047 |
| 0.44521328 | 2.16E-10   | 0.36174857 | 4.21E-07   | -0.3008591 | 3.17E-05   |
| -0.1852418 | 0.01159057 | -0.1688613 | 0.02157771 | -0.0336307 | 0.64950162 |
| -0.3467272 | 1.33E-06   | -0.1678923 | 0.02235136 | 0.01421589 | 0.84769818 |
| -0.2531871 | 0.00050667 | -0.2929871 | 5.18E-05   | 0.09341105 | 0.20598488 |
| -0.0587568 | 0.42693447 | -0.1266555 | 0.08580581 | 0.22078093 | 0.00252819 |
| -0.142003  | 0.05383754 | -0.301925  | 2.96E-05   | 0.15570695 | 0.03430955 |
| -0.1910238 | 0.00919753 | -0.1515224 | 0.03950747 | 0.05542128 | 0.4536898  |
| 0.31229205 | 1.51E-05   | 0.2312162  | 0.0015424  | -0.0792196 | 0.2837717  |
| -0.0097653 | 0.89504345 | -0.0834415 | 0.25881134 | -0.3510527 | 9.62E-07   |
| -0.0580857 | 0.43224274 | 0.02642045 | 0.72110409 | -0.3146112 | 1.29E-05   |
| 0.68046433 | 1.68E-26   | 0.46671209 | 2.14E-11   | -0.1775101 | 0.01563774 |
| 0.24648538 | 0.00071914 | 0.12467814 | 0.09085278 | -0.062615  | 0.39715407 |
| -0.109898  | 0.13644587 | -0.1842131 | 0.01206949 | 0.32280161 | 7.42E-06   |
| 0.00317844 | 0.96575054 | -0.012346  | 0.86753402 | -0.1885341 | 0.01016838 |
| 0.09614619 | 0.192956   | -0.0755113 | 0.30698765 | -0.1619992 | 0.02759013 |
| -0.0356335 | 0.63013553 | -0.1691715 | 0.02133502 | 0.1402213  | 0.05694859 |
| 0.0446908  | 0.54581541 | -0.0364994 | 0.62183953 | 0.2489231  | 0.00063382 |
| -0.0107977 | 0.88402096 | -0.0805203 | 0.27591522 | 0.2087391  | 0.0043528  |
| -0.2782927 | 0.00012527 | -0.1281865 | 0.0820543  | -0.013231  | 0.858135   |
| -0.1356759 | 0.0655619  | -0.0405911 | 0.58329171 | -0.2310813 | 0.0015525  |
| 0.05597387 | 0.44919344 | -0.0154366 | 0.83479922 | 0.04230493 | 0.56748104 |
| 0.29554881 | 4.42E-05   | 0.33484859 | 3.18E-06   | -0.243483  | 0.00083874 |
| -0.061082  | 0.4088353  | -0.1133742 | 0.12440058 | -0.1831637 | 0.0125759  |
| 0.13352495 | 0.06999416 | -0.1340986 | 0.06878885 | -0.3057706 | 2.31E-05   |
| 0.26930318 | 0.00020988 | 0.02680678 | 0.71719851 | -0.1470277 | 0.0458137  |
| -0.1601153 | 0.02947243 | -0.2634943 | 0.00029023 | 0.13756675 | 0.0618575  |
| 0.0906947  | 0.21953999 | -0.0629133 | 0.39490478 | -0.3043359 | 2.53E-05   |
| -0.0571645 | 0.43959136 | -0.1885814 | 0.01014912 | 0.15223929 | 0.0385726  |
| -0.2478115 | 0.0006715  | -0.1235172 | 0.09392464 | 0.23694621 | 0.00116488 |

|            |            |            |            |            |            |
|------------|------------|------------|------------|------------|------------|
| -0.2864419 | 7.73E-05   | -0.3448073 | 1.54E-06   | 0.15641705 | 0.0334877  |
| -0.0716252 | 0.33262009 | -0.1524616 | 0.03828653 | 0.19174542 | 0.00893191 |
| -0.1412814 | 0.05508022 | -0.2377878 | 0.0011172  | 0.37674839 | 1.25E-07   |
| -0.3351611 | 3.11E-06   | -0.2173907 | 0.00295458 | -0.4851899 | 2.57E-12   |
| 0.61560995 | 1.11E-20   | 0.21436278 | 0.00338935 | -0.09635   | 0.19200977 |
| -0.2093439 | 0.00423851 | -0.2070529 | 0.00468624 | 0.14949415 | 0.04225642 |
| -0.0647104 | 0.38151457 | -0.0901402 | 0.22238332 | 0.17264034 | 0.01877748 |
| 0.10220645 | 0.16624709 | 0.01019    | 0.89050667 | -0.1901222 | 0.00953917 |
| 0.10496411 | 0.15504929 | 0.01431273 | 0.84667344 | -0.0724461 | 0.32709451 |
| -0.0785701 | 0.28775052 | -0.0360173 | 0.62645299 | -0.1525812 | 0.0381333  |
| -0.2130506 | 0.00359509 | -0.2828868 | 9.56E-05   | 0.35758204 | 5.83E-07   |
| -0.003628  | 0.9609097  | -0.1176951 | 0.11059456 | 0.25130714 | 0.0005595  |
| -0.021924  | 0.76706743 | -0.0868955 | 0.23954625 | 0.18273055 | 0.01279028 |
| -0.2389415 | 0.00105473 | -0.1488834 | 0.04311493 | 0.26223881 | 0.00031099 |
| -0.2027211 | 0.00565037 | -0.3029621 | 2.77E-05   | -0.3594686 | 5.03E-07   |
| 0.145943   | 0.04745562 | 0.0178053  | 0.80989932 | 0.17840298 | 0.01511467 |
| -0.3277005 | 5.28E-06   | -0.1986309 | 0.00671978 | -0.2090526 | 0.00429321 |
| 0.20395433 | 0.00535926 | 0.29273408 | 5.26E-05   | -0.4925519 | 1.07E-12   |
| -0.0522895 | 0.47964288 | 0.03853685 | 0.60250704 | -0.4169036 | 3.57E-09   |
| -0.1325115 | 0.07216545 | -0.1865325 | 0.0110134  | 0.43775334 | 4.63E-10   |
| 0.00293113 | 0.96841403 | -0.1439858 | 0.05054227 | 0.14532794 | 0.0484082  |
| -0.1545967 | 0.03562876 | -0.2379163 | 0.00111007 | 0.17022352 | 0.02052934 |
| -0.2429349 | 0.00086245 | -0.0985398 | 0.18205568 | -0.4211012 | 2.39E-09   |
| -0.1274665 | 0.08380181 | -0.2376945 | 0.00112239 | 0.2878278  | 7.10E-05   |
| -0.2265516 | 0.00192888 | -0.0347339 | 0.63880404 | -0.2415346 | 0.00092586 |
| 0.11527735 | 0.1181637  | -0.0019474 | 0.97901196 | 0.19420405 | 0.00807723 |
| 0.01325672 | 0.85786177 | -0.1169316 | 0.11294269 | 0.38784445 | 4.91E-08   |
| -0.1403974 | 0.05663461 | -0.2913537 | 5.73E-05   | 0.09243294 | 0.21079463 |
| -0.2732823 | 0.00016739 | -0.1819111 | 0.01320467 | -0.350814  | 9.79E-07   |
| -0.2102421 | 0.00407373 | -0.2212608 | 0.00247256 | -0.061861  | 0.40287399 |
| 0.35289707 | 8.36E-07   | 0.25939959 | 0.00036312 | -0.2322767 | 0.00146505 |
| 0.03172279 | 0.66817069 | -0.1570876 | 0.03272699 | -0.2966306 | 4.13E-05   |
| -0.1801103 | 0.01415691 | -0.0965908 | 0.19089621 | -0.1358003 | 0.06531273 |
| -0.1078219 | 0.14405432 | -0.147266  | 0.0454595  | 0.18906223 | 0.00995518 |
| -0.2706659 | 0.00019431 | -0.2439877 | 0.00081743 | 0.25519343 | 0.0004554  |
| 0.14854277 | 0.04360012 | 0.05521611 | 0.45536562 | 0.08680785 | 0.24002229 |
| -0.1752222 | 0.01705071 | -0.1823901 | 0.01296105 | 0.21893666 | 0.00275267 |
| 0.25202964 | 0.00053862 | 0.10164474 | 0.16860017 | 0.01700924 | 0.81824779 |
| 0.23866528 | 0.00106939 | 0.19306502 | 0.00846372 | -0.1565583 | 0.03332619 |
| -0.0885323 | 0.23077573 | -0.185048  | 0.01167949 | 0.21525982 | 0.00325488 |
| -0.1108313 | 0.13312761 | -0.2096284 | 0.00418567 | -0.0738294 | 0.31791763 |
| -0.0487461 | 0.5099492  | -0.0202737 | 0.78415265 | -0.3916114 | 3.54E-08   |
| -0.1295639 | 0.07879311 | -0.0987426 | 0.1811536  | 0.17176586 | 0.01939578 |
| -0.0975691 | 0.18642017 | 0.06981725 | 0.3449991  | -0.4056999 | 1.01E-08   |
| -0.1024341 | 0.16530051 | -0.0858397 | 0.24532542 | 0.11462567 | 0.12027133 |
| 0.19837643 | 0.00679191 | 0.06567276 | 0.37445953 | 0.05541813 | 0.45371545 |

|            |            |            |            |            |            |
|------------|------------|------------|------------|------------|------------|
| -0.3774634 | 1.18E-07   | -0.3255665 | 6.13E-06   | 0.36676198 | 2.83E-07   |
| -0.146991  | 0.04586854 | -0.1936523 | 0.00826243 | 0.18080524 | 0.01378254 |
| -0.14903   | 0.04290753 | -0.2971705 | 4.00E-05   | 0.37629835 | 1.30E-07   |
| -0.2225048 | 0.00233351 | -0.2452698 | 0.00076553 | 0.4404052  | 3.54E-10   |
| -0.1056211 | 0.15246719 | -0.0832994 | 0.25962624 | -0.136448  | 0.06402777 |
| -0.0602637 | 0.41515205 | -0.1336703 | 0.06968721 | 0.08106324 | 0.27267965 |
| 0.50526501 | 2.22E-13   | 0.21437749 | 0.0033871  | -0.2121772 | 0.00373821 |
| 0.02171682 | 0.76920634 | 0.02721033 | 0.71312668 | -0.3377968 | 2.57E-06   |
| -0.2779645 | 0.00012769 | -0.2212361 | 0.0024754  | 0.22648639 | 0.00193486 |
| 0.0646063  | 0.38228277 | -0.0704616 | 0.34055451 | 0.1204044  | 0.10256965 |
| -0.3249068 | 6.41E-06   | -0.1072863 | 0.14606827 | -0.4241907 | 1.78E-09   |
| 0.05624072 | 0.44703114 | 0.15229311 | 0.03850318 | -0.3503286 | 1.02E-06   |
| -0.3650282 | 3.24E-07   | -0.3149212 | 1.27E-05   | -0.4860842 | 2.32E-12   |
| -0.2398934 | 0.00100563 | 0.01138977 | 0.87771023 | -0.0750215 | 0.31014537 |
| -0.0679098 | 0.35837108 | -0.1991197 | 0.00658312 | 0.31941151 | 9.35E-06   |
| -0.0027301 | 0.97057952 | -0.0114923 | 0.87661792 | 0.38136021 | 8.52E-08   |
| -0.3056625 | 2.33E-05   | -0.1991326 | 0.00657954 | 0.34519193 | 1.49E-06   |
| -0.4759306 | 7.56E-12   | -0.4071294 | 8.86E-09   | 0.46299459 | 3.23E-11   |
| 0.03971165 | 0.59148341 | 0.01212123 | 0.86992392 | -0.212687  | 0.00365405 |
| -0.3385441 | 2.44E-06   | -0.2001662 | 0.00629886 | 0.32564797 | 6.09E-06   |
| 0.03163885 | 0.66899682 | 0.0126635  | 0.86415961 | -0.1799649 | 0.01423636 |
| -0.1212779 | 0.10008265 | -0.071711  | 0.33203948 | 0.01227254 | 0.86831476 |
| 0.12307962 | 0.09510364 | 0.00147184 | 0.98413627 | 0.28784584 | 7.10E-05   |
| 0.09879771 | 0.18090886 | -0.0010196 | 0.98901059 | 0.26098247 | 0.00033313 |
| -0.3119482 | 1.54E-05   | -0.1405506 | 0.05636272 | 0.05058227 | 0.49412167 |
| -0.0642287 | 0.38507667 | 0.02116343 | 0.77492805 | -0.14351   | 0.05131732 |
| 0.11341497 | 0.12426424 | 0.07404304 | 0.31651556 | 0.19558806 | 0.00762876 |
| -0.2799229 | 0.00011386 | -0.3371461 | 2.70E-06   | 0.33013911 | 4.45E-06   |
| 0.10600579 | 0.15097056 | -0.0434255 | 0.55725477 | 0.11837663 | 0.10853099 |
| -0.1153523 | 0.11792317 | 0.00174604 | 0.98118148 | -0.2620209 | 0.00031473 |
| 0.02161896 | 0.77021728 | 0.02908519 | 0.69431717 | -0.3159421 | 1.18E-05   |
| -0.2405479 | 0.00097309 | -0.2349403 | 0.00128615 | 0.16724478 | 0.02288152 |
| -0.1236715 | 0.09351159 | -0.1126783 | 0.12674364 | 0.36635503 | 2.92E-07   |
| 0.04659322 | 0.52883653 | -0.1127544 | 0.12648566 | 0.05149871 | 0.48632069 |
| -0.1251283 | 0.08968341 | -0.0278935 | 0.70625161 | -0.2334511 | 0.00138353 |
| 0.05907826 | 0.42440471 | 0.01539974 | 0.83518856 | -0.3088741 | 1.89E-05   |
| 0.05408054 | 0.4647031  | -0.0023226 | 0.97496913 | 0.20773528 | 0.00454863 |
| -0.2913755 | 5.72E-05   | -0.2087553 | 0.00434969 | 0.28824333 | 6.93E-05   |
| -0.0750091 | 0.31022508 | -0.1698505 | 0.02081195 | 0.26021128 | 0.00034744 |
| -0.242771  | 0.00086966 | -0.0731585 | 0.32234756 | 0.18057347 | 0.01390642 |
| -0.2599091 | 0.0003532  | -0.0204228 | 0.78260509 | -0.2284269 | 0.00176398 |
| 0.11790106 | 0.10996769 | 0.11335263 | 0.1244726  | 0.18721173 | 0.01071996 |
| -0.1868872 | 0.0108593  | -0.0322979 | 0.66252078 | -0.0519038 | 0.48289369 |
| -0.0275988 | 0.70921436 | -0.0957858 | 0.19463774 | -0.3600416 | 4.81E-07   |
| 0.4125661  | 5.36E-09   | 0.12620099 | 0.08694547 | -0.2726819 | 0.00017324 |
| 0.16680506 | 0.0232477  | 0.17248584 | 0.01888546 | -0.0464959 | 0.52969899 |

|            |            |            |            |            |            |
|------------|------------|------------|------------|------------|------------|
| 0.04596257 | 0.53443531 | -0.0170066 | 0.81827522 | 0.21089358 | 0.00395786 |
| -0.0857485 | 0.24582926 | -0.1982128 | 0.00683866 | 0.29798132 | 3.80E-05   |
| -0.0518274 | 0.48353878 | -0.1651787 | 0.02464622 | 0.01307932 | 0.85974427 |
| -0.0718547 | 0.33106929 | -0.0531417 | 0.47250188 | -0.1323252 | 0.07257059 |
| -0.4240756 | 1.80E-09   | -0.2797615 | 0.00011494 | 0.03118435 | 0.67347713 |
| 0.04227386 | 0.56776581 | -0.0452433 | 0.54085656 | 0.20695483 | 0.00470632 |
| -0.1506834 | 0.04062573 | -0.2040784 | 0.00533072 | 0.14658447 | 0.04647881 |
| -0.1491185 | 0.04278282 | -0.0655626 | 0.37526314 | -0.2589808 | 0.00037146 |
| 0.01925441 | 0.79475782 | -0.0874743 | 0.23641855 | 0.05912668 | 0.42402446 |
| -0.2984689 | 3.68E-05   | -0.1982213 | 0.00683624 | 0.22360622 | 0.00221637 |
| 0.4542274  | 8.35E-11   | 0.32792103 | 5.20E-06   | 0.19850509 | 0.00675535 |
| -0.0289825 | 0.69534222 | -0.0795939 | 0.2814952  | 0.02449552 | 0.74066973 |
| 0.19093389 | 0.00923109 | 0.04368971 | 0.55485635 | 0.11983254 | 0.10422405 |
| -0.1065056 | 0.14904239 | -0.1732872 | 0.01833121 | -0.1594935 | 0.0301173  |
| -0.2553998 | 0.00045041 | -0.228645  | 0.00174566 | 0.06765282 | 0.36019697 |
| -0.1666019 | 0.02341859 | -0.1933431 | 0.00836786 | 0.11447026 | 0.12077822 |
| 0.57787921 | 7.16E-18   | 0.27848796 | 0.00012385 | -0.358573  | 5.39E-07   |
| -0.1465858 | 0.04647686 | -0.0472555 | 0.52298881 | 0.14202311 | 0.05380331 |
| -0.1902422 | 0.00949307 | -0.0198604 | 0.78844793 | -0.3019939 | 2.94E-05   |
| 0.02630332 | 0.72228956 | -0.1725063 | 0.01887113 | 0.18596018 | 0.01126614 |
| 0.00769005 | 0.91725771 | -0.0258969 | 0.72640831 | 0.21403168 | 0.00344023 |
| -0.1475822 | 0.04499299 | -0.1250225 | 0.08995729 | 0.30095015 | 3.15E-05   |
| 0.26176003 | 0.00031926 | 0.17430216 | 0.0176495  | -0.2996531 | 3.42E-05   |
| -0.1818791 | 0.01322109 | 0.03978244 | 0.59082209 | -0.2683939 | 0.00022091 |
| -0.2098045 | 0.00415328 | -0.1277619 | 0.08308121 | -0.2503504 | 0.0005883  |
| 0.16974582 | 0.02089185 | -0.1078016 | 0.14413028 | 0.30858623 | 1.92E-05   |
| -0.0448613 | 0.54428246 | -0.1001606 | 0.1749366  | 0.41992843 | 2.68E-09   |
| -0.0649122 | 0.38002851 | -0.128779  | 0.08063847 | 0.10485844 | 0.15546765 |
| 0.07738997 | 0.29507465 | -0.0183669 | 0.80402291 | 0.29240522 | 5.37E-05   |
| 0.13365411 | 0.06972129 | 0.04289597 | 0.56207604 | 0.32184757 | 7.92E-06   |
| -0.0386746 | 0.60120934 | -0.1035381 | 0.16076688 | 0.10561756 | 0.1524811  |
| 0.11189305 | 0.12942822 | 0.06293759 | 0.39472167 | 0.17294394 | 0.01856686 |
| 0.11567647 | 0.11688713 | 0.07582021 | 0.3050076  | 0.2283252  | 0.00177258 |
| -0.0653713 | 0.37666072 | -0.188713  | 0.0100957  | 0.18460959 | 0.01188289 |
| 0.0443521  | 0.54886614 | -0.0895762 | 0.22530231 | 0.23037695 | 0.00160623 |
| -0.2474898 | 0.00068278 | -0.1320777 | 0.07311139 | 0.13674631 | 0.06344313 |
| -0.1100693 | 0.13583234 | -0.1509401 | 0.04028082 | -0.0349783 | 0.63644424 |
| 0.148479   | 0.04369145 | -0.0810943 | 0.27249564 | 0.12905341 | 0.07998941 |
| -0.0623388 | 0.39924393 | -0.1627157 | 0.02690169 | 0.28661967 | 7.64E-05   |
| 0.38310038 | 7.36E-08   | 0.16572896 | 0.02416519 | 0.21050617 | 0.00402641 |
| -0.192337  | 0.00871924 | 0.04369528 | 0.55480591 | -0.1212229 | 0.10023779 |
| -0.2443954 | 0.00080059 | -0.2393207 | 0.00103491 | 0.39889721 | 1.87E-08   |
| 0.04372741 | 0.55451459 | -0.0656005 | 0.37498681 | 0.33722067 | 2.68E-06   |
| -0.201637  | 0.00591785 | -0.2524086 | 0.00052796 | 0.20088929 | 0.00610889 |
| 0.11222678 | 0.12828191 | 0.00130501 | 0.98593427 | 0.38994377 | 4.10E-08   |
| -0.049381  | 0.50444723 | -0.1636377 | 0.02603747 | 0.27040077 | 0.00019725 |

|            |            |            |            |            |            |
|------------|------------|------------|------------|------------|------------|
| -0.0597264 | 0.41933112 | -0.0613543 | 0.4067451  | -0.2843117 | 8.78E-05   |
| 0.14543265 | 0.04824491 | -0.0389101 | 0.59899469 | 0.15112188 | 0.04003807 |
| -0.2578081 | 0.00039578 | -0.2018122 | 0.00587388 | -0.3833931 | 7.18E-08   |
| -0.3084934 | 1.94E-05   | -0.1228054 | 0.0958485  | -0.144118  | 0.05032872 |
| 0.15132445 | 0.03976897 | -0.0781078 | 0.29060461 | -0.0823045 | 0.26538004 |
| -0.2000441 | 0.00633146 | -0.0219002 | 0.76731296 | -0.0941936 | 0.20219405 |
| -0.4030799 | 1.28E-08   | -0.2850496 | 8.40E-05   | 0.08685221 | 0.23978128 |
| -0.3659084 | 3.02E-07   | -0.208875  | 0.00432688 | -0.4018161 | 1.44E-08   |
| 0.25193441 | 0.00054133 | 0.11083131 | 0.13312753 | -0.0155601 | 0.83349719 |
| -0.3403189 | 2.14E-06   | -0.3910585 | 3.72E-08   | 0.15789705 | 0.03182835 |
| 0.13458821 | 0.06777359 | 0.01475948 | 0.84194922 | 0.33701169 | 2.72E-06   |
| -0.0591139 | 0.42412456 | -0.1380921 | 0.06085929 | 0.1841661  | 0.01209179 |
| -0.2123169 | 0.00371496 | -0.1932116 | 0.00841307 | 0.17387444 | 0.01793404 |
| -0.3394512 | 2.28E-06   | -0.3342786 | 3.31E-06   | -0.2919925 | 5.51E-05   |
| 0.15147673 | 0.03956769 | -0.0770167 | 0.29741694 | -0.2891539 | 6.56E-05   |
| -0.4293966 | 1.07E-09   | -0.4508256 | 1.20E-10   | 0.28940779 | 6.45E-05   |
| 0.17423576 | 0.01769341 | -0.0294063 | 0.69111382 | 0.09580474 | 0.19454888 |
| -0.039966  | 0.58910935 | -0.0923425 | 0.21124363 | 0.07657255 | 0.30021987 |
| 0.0065978  | 0.92897663 | -0.0030404 | 0.96723695 | 0.15501728 | 0.03512405 |
| -0.3171186 | 1.09E-05   | -0.1534468 | 0.03704005 | 0.22601725 | 0.00197837 |
| -0.0823748 | 0.26497046 | -0.115283  | 0.11814569 | 0.37442599 | 1.52E-07   |
| -0.0700033 | 0.3437116  | -0.0848554 | 0.25080043 | -0.2339292 | 0.00135156 |
| -0.2252012 | 0.00205619 | -0.159834  | 0.02976277 | -0.4027035 | 1.33E-08   |
| -0.3672204 | 2.72E-07   | -0.3038877 | 2.61E-05   | 0.49392311 | 9.04E-13   |
| -0.1025987 | 0.16461834 | -0.2579486 | 0.00039279 | 0.45672211 | 6.39E-11   |
| -0.4661724 | 2.27E-11   | -0.3750869 | 1.44E-07   | 0.35521975 | 6.99E-07   |
| -1.94E-06  | 0.9999791  | -0.0387184 | 0.60079755 | -0.1432379 | 0.051765   |
| -0.1932101 | 0.00841359 | -0.3192609 | 9.45E-06   | 0.13734119 | 0.06229015 |
| 0.00447414 | 0.95180304 | -0.0903633 | 0.22123631 | 0.18570943 | 0.01137846 |
| 0.08049602 | 0.2760604  | -0.0033382 | 0.96403016 | 0.20173927 | 0.00589215 |
| -0.0141882 | 0.84799148 | -0.1820407 | 0.01313835 | 0.24470941 | 0.00078783 |
| -0.0973326 | 0.18749501 | -0.0414762 | 0.57510064 | -0.1129763 | 0.125736   |
| 0.43283296 | 7.60E-10   | 0.23788987 | 0.00111153 | -0.2393017 | 0.0010359  |
| -0.1277589 | 0.08308865 | -0.1405362 | 0.05638819 | 0.31415165 | 1.33E-05   |
| -0.1211992 | 0.10030472 | -0.218591  | 0.0027967  | 0.1988333  | 0.00666288 |
| -0.1371059 | 0.06274414 | -0.0480826 | 0.51573241 | -0.1112745 | 0.13157366 |
| 0.14450164 | 0.04971298 | 0.03045957 | 0.68064548 | 0.17344977 | 0.01822049 |
| 0.11364581 | 0.12349513 | -0.0854011 | 0.24775444 | -0.0744776 | 0.31367553 |
| -0.2609783 | 0.00033321 | -0.2718713 | 0.00018144 | 0.01689805 | 0.81941546 |
| -0.042567  | 0.56508158 | -0.086997  | 0.23899583 | -0.0919502 | 0.2131978  |
| -0.2140695 | 0.00343439 | -0.2662037 | 0.00024973 | 0.01556573 | 0.83343773 |
| -0.0994139 | 0.1781904  | -0.1555192 | 0.03452968 | 0.22509881 | 0.00206614 |
| 0.22265665 | 0.00231703 | 0.23585592 | 0.00122943 | -0.1885679 | 0.01015463 |
| -0.1037338 | 0.15997273 | -0.05287   | 0.4747722  | 0.36267141 | 3.91E-07   |
| -0.3764048 | 1.29E-07   | -0.2823629 | 9.86E-05   | -0.33784   | 2.56E-06   |
| -0.096743  | 0.19019482 | -0.0475118 | 0.52073452 | -0.3064591 | 2.21E-05   |



|            |            |            |            |            |            |
|------------|------------|------------|------------|------------|------------|
| 0.38950371 | 4.26E-08   | 0.31814069 | 1.02E-05   | -0.3973838 | 2.13E-08   |
| -0.1593578 | 0.03025964 | -0.1636461 | 0.02602974 | 0.19568643 | 0.00759775 |
| -0.1989527 | 0.00662952 | -0.1573019 | 0.03248703 | -0.2091769 | 0.0042698  |
| -0.1227206 | 0.09607968 | -0.1320849 | 0.07309566 | 0.18383431 | 0.01225018 |
| -0.0673851 | 0.3621051  | -0.1321092 | 0.07304252 | 0.13110526 | 0.07526864 |
| -0.0503891 | 0.4957743  | -0.0917008 | 0.21444698 | 0.455159   | 7.56E-11   |
| -0.1426717 | 0.05270694 | 0.00414181 | 0.9553791  | 0.04883136 | 0.50920854 |
| -0.1006598 | 0.17278587 | -0.0954342 | 0.19628847 | 0.24658676 | 0.00071539 |
| -0.1707237 | 0.0201556  | -0.1484294 | 0.04376256 | 0.04734301 | 0.52221878 |
| 0.1096869  | 0.13720521 | -0.0698138 | 0.34502296 | -0.152348  | 0.03843247 |
| -0.0312286 | 0.6730401  | 0.08195533 | 0.26741969 | -0.2013308 | 0.00599543 |
| -0.3572513 | 5.98E-07   | -0.332118  | 3.87E-06   | -0.3644036 | 3.41E-07   |
| -0.0807835 | 0.27434375 | -0.1661386 | 0.0238123  | 0.46086485 | 4.08E-11   |
| 0.04058122 | 0.58338354 | -0.0056135 | 0.93955067 | -0.3216194 | 8.04E-06   |
| 0.00132114 | 0.98576037 | -0.0532823 | 0.4713294  | -0.5217679 | 2.62E-14   |
| -0.3059987 | 2.28E-05   | -0.314967  | 1.26E-05   | 0.14672018 | 0.04627433 |
| 0.29378576 | 4.93E-05   | 0.19422604 | 0.00806993 | -0.2540829 | 0.00048315 |
| -0.1800587 | 0.01418506 | -0.2189286 | 0.00275369 | 0.255995   | 0.00043629 |
| -0.2554132 | 0.00045008 | -0.0226123 | 0.75997421 | -0.1663322 | 0.02364714 |
| -0.2745314 | 0.0001558  | -0.1924177 | 0.00869061 | 0.20067001 | 0.00616595 |
| -0.242112  | 0.00089921 | -0.245706  | 0.00074857 | 0.10416333 | 0.15824077 |
| 0.02862422 | 0.69892507 | -0.0109204 | 0.8827128  | 0.17303273 | 0.01850565 |
| -0.0517651 | 0.48406558 | -0.2391823 | 0.00104211 | 0.15614639 | 0.03379896 |
| 0.167846   | 0.02238889 | -0.0768109 | 0.29871348 | 0.15784238 | 0.03188839 |
| -0.1585069 | 0.03116525 | -0.2695635 | 0.00020682 | 0.36345964 | 3.67E-07   |
| -0.1358282 | 0.06525684 | -0.0487644 | 0.50979062 | -0.4206792 | 2.49E-09   |
| -0.2154009 | 0.00323418 | -0.2341053 | 0.00133995 | 0.26260786 | 0.00030474 |
| -0.1506682 | 0.04064631 | -0.0616112 | 0.40477955 | 0.44927355 | 1.41E-10   |
| -0.1804008 | 0.01399936 | -0.2130829 | 0.00358989 | -0.2167274 | 0.00304526 |
| 0.17488436 | 0.0172685  | 0.05898096 | 0.42516946 | 0.13973195 | 0.05782853 |
| -0.2435786 | 0.00083466 | -0.2019388 | 0.00584229 | -0.3455232 | 1.46E-06   |
| -0.123799  | 0.09317137 | -0.0275966 | 0.70923631 | -0.2361761 | 0.00121014 |
| -0.4132697 | 5.02E-09   | -0.3882124 | 4.76E-08   | -0.0445572 | 0.54701772 |
| 0.23228758 | 0.00146427 | 0.04670664 | 0.52783272 | 0.13717137 | 0.06261753 |
| 0.33696334 | 2.73E-06   | 0.25557129 | 0.0004463  | -0.2431009 | 0.0008552  |
| -0.1380193 | 0.06099696 | -0.0943506 | 0.20143991 | 0.35204086 | 8.92E-07   |
| 0.23205534 | 0.00148089 | 0.14902712 | 0.04291162 | 0.07411332 | 0.31605519 |
| -0.2246824 | 0.00210709 | -0.1848594 | 0.0117666  | -0.3585981 | 5.38E-07   |
| -0.0618133 | 0.40323732 | -0.1345386 | 0.06787595 | 0.43833417 | 4.37E-10   |
| -0.3014188 | 3.05E-05   | -0.2129066 | 0.00361833 | 0.20765489 | 0.00456465 |
| -0.0413144 | 0.57659405 | -0.1383343 | 0.0604037  | -0.3683421 | 2.49E-07   |
| -0.0750252 | 0.3101214  | -0.2503643 | 0.00058787 | -0.1530206 | 0.03757496 |
| 0.12079757 | 0.10144428 | -0.0491759 | 0.50622078 | 0.24275368 | 0.00087042 |
| 0.0485958  | 0.51125644 | -0.0295953 | 0.689231   | -0.4053811 | 1.04E-08   |
| 0.23967771 | 0.00101657 | 0.4288511  | 1.13E-09   | -0.3879694 | 4.86E-08   |
| 0.21203406 | 0.00376214 | 0.01437223 | 0.84604397 | -0.2636856 | 0.00028718 |

|            |            |            |            |            |            |
|------------|------------|------------|------------|------------|------------|
| -0.4471971 | 1.75E-10   | -0.312353  | 1.50E-05   | -0.3764071 | 1.29E-07   |
| -0.0506678 | 0.49339096 | -0.1038444 | 0.15952558 | -0.5754744 | 1.05E-17   |
| -0.1435676 | 0.051223   | -0.1035875 | 0.16056593 | -0.2258338 | 0.00199563 |
| -0.0550901 | 0.45639658 | -0.0335624 | 0.65016634 | 0.40893622 | 7.51E-09   |
| 0.01886766 | 0.79879165 | 0.3061573  | 2.25E-05   | -0.1752365 | 0.01704153 |
| -0.1231042 | 0.09503701 | -0.128248  | 0.0819065  | -0.0193899 | 0.79334638 |
| 0.20961048 | 0.00418899 | 0.03845335 | 0.60329398 | -0.0972485 | 0.18787849 |
| -0.2756159 | 0.00014635 | -0.2772769 | 0.00013291 | 0.18626457 | 0.01113109 |
| -0.0938649 | 0.20378027 | 0.02366742 | 0.7491392  | 0.23341907 | 0.00138571 |
| -0.0404571 | 0.58453656 | -0.0967799 | 0.19002499 | 0.24314565 | 0.00085326 |
| 0.04416732 | 0.55053399 | -0.0502243 | 0.49718715 | 0.2466258  | 0.00071395 |
| 0.03764933 | 0.61089533 | -0.0371875 | 0.61528065 | -0.1410081 | 0.05555703 |
| 0.07514874 | 0.30932286 | 0.06939803 | 0.34791057 | -0.1453008 | 0.04845058 |
| -0.3850734 | 6.22E-08   | -0.3640631 | 3.50E-07   | 0.46526004 | 2.52E-11   |
| -0.3500449 | 1.04E-06   | -0.3242592 | 6.71E-06   | 0.33389366 | 3.41E-06   |
| -0.0415458 | 0.57445927 | 0.00348998 | 0.96239585 | -0.2659863 | 0.00025278 |
| -0.0810168 | 0.27295511 | -0.1296575 | 0.07857547 | 0.00890763 | 0.90421535 |
| 0.08698475 | 0.23906202 | 0.10736985 | 0.14575284 | 0.0629379  | 0.39471937 |
| -0.2845941 | 8.63E-05   | -0.2247267 | 0.0021027  | -0.2009593 | 0.00609078 |
| -0.139751  | 0.05779399 | -0.0334205 | 0.6515479  | -0.3778621 | 1.14E-07   |
| 0.50353426 | 2.76E-13   | 0.26798751 | 0.00022602 | -0.2040182 | 0.00534455 |
| 0.10489107 | 0.15533837 | 0.03278889 | 0.65771258 | -0.3759169 | 1.34E-07   |
| 0.16504665 | 0.02476292 | 0.14128599 | 0.05507221 | -0.3558967 | 6.64E-07   |
| 0.02189843 | 0.76733124 | 0.00246548 | 0.97342982 | -0.3920963 | 3.40E-08   |
| -0.0063704 | 0.93141835 | -0.080372  | 0.27680357 | 0.18255797 | 0.01287659 |
| -0.3997186 | 1.73E-08   | -0.3170566 | 1.10E-05   | -0.0156003 | 0.83307331 |
| -0.1385299 | 0.06003777 | -0.1274876 | 0.08375017 | 0.19051324 | 0.00938964 |
| -0.1008076 | 0.1721528  | -0.1631308 | 0.02650967 | 0.34381185 | 1.66E-06   |
| -0.1045015 | 0.15688684 | -0.0501488 | 0.49783472 | -0.0730566 | 0.32302346 |
| -0.0838501 | 0.25647829 | -0.146185  | 0.04708511 | 0.31128335 | 1.61E-05   |
| 0.00671368 | 0.9277325  | 0.04624555 | 0.53191944 | -0.1686238 | 0.02176515 |
| 0.12345092 | 0.09410244 | 0.04305394 | 0.56063559 | -0.097106  | 0.1885294  |
| 0.07787707 | 0.2920366  | 0.02967522 | 0.68843543 | -0.1255448 | 0.08861222 |
| 0.22153506 | 0.00244128 | 0.15835231 | 0.0313322  | -0.3985709 | 1.92E-08   |
| 0.69010655 | 1.69E-27   | 0.48848796 | 1.74E-12   | -0.2192074 | 0.00271862 |
| -0.4450495 | 2.19E-10   | -0.3721479 | 1.83E-07   | 0.38022509 | 9.38E-08   |
| -0.0424958 | 0.56573312 | -0.0886404 | 0.23020503 | -0.1636798 | 0.02599863 |
| -0.1875046 | 0.01059558 | -0.2244252 | 0.00213276 | 0.20819319 | 0.00445834 |
| -0.1074883 | 0.14530612 | -0.1105946 | 0.13396334 | 0.0672225  | 0.36326748 |
| -0.3841187 | 6.75E-08   | -0.3799712 | 9.58E-08   | 0.099778   | 0.17659817 |
| -0.1193313 | 0.10569148 | -0.1610772 | 0.02849814 | -0.0640931 | 0.38608229 |
| -0.1804397 | 0.01397838 | -0.1652509 | 0.02458265 | -0.4253559 | 1.59E-09   |
| -0.174353  | 0.01761595 | -0.2079076 | 0.00451446 | -0.1821028 | 0.01310671 |
| 0.09669742 | 0.19040454 | -0.0125606 | 0.86525261 | -0.0837169 | 0.25723752 |
| -0.0199971 | 0.78702701 | 0.04220715 | 0.56837756 | 0.25836305 | 0.00038409 |
| 0.18225073 | 0.01303152 | 0.06678245 | 0.36642418 | 0.07087151 | 0.33774556 |

|            |            |            |            |            |            |
|------------|------------|------------|------------|------------|------------|
| 0.09118651 | 0.21703985 | 0.07907058 | 0.28468107 | -0.2487899 | 0.00063823 |
| 0.07788002 | 0.29201828 | 0.19828965 | 0.00681666 | -0.3513165 | 9.43E-07   |
| -0.0532126 | 0.47191098 | -0.2219963 | 0.00238947 | -0.1435403 | 0.05126763 |
| -0.1481308 | 0.04419302 | 0.01285321 | 0.86214461 | 0.27220091 | 0.00017806 |
| -0.0498823 | 0.50012455 | 0.00390485 | 0.95792957 | 0.19482175 | 0.00787426 |
| 0.17796598 | 0.01536873 | 0.01195278 | 0.87171592 | 0.17595015 | 0.01658954 |
| 0.07224943 | 0.32841286 | -0.0497327 | 0.50141263 | 0.20681818 | 0.00473443 |
| -0.1262056 | 0.08693393 | -0.2300665 | 0.00163046 | 0.07128281 | 0.33494226 |
| -0.0019274 | 0.97922667 | -0.0237625 | 0.74816493 | -0.2317764 | 0.00150109 |
| -0.3248782 | 6.43E-06   | -0.2317871 | 0.0015003  | -0.3531365 | 8.21E-07   |
| 0.02852951 | 0.69987315 | -0.133111  | 0.07087453 | 0.13142276 | 0.07455874 |
| 0.26826568 | 0.00022251 | 0.05343875 | 0.47002675 | 0.31678807 | 1.12E-05   |
| 0.14474879 | 0.04931969 | 0.04077485 | 0.58158696 | 0.14311833 | 0.05196274 |
| 0.07196879 | 0.33030003 | -0.0940048 | 0.20310411 | 0.23879388 | 0.00106254 |
| -0.0894088 | 0.22617357 | -0.1848079 | 0.01179049 | 0.13531298 | 0.06629313 |
| -0.4815822 | 3.93E-12   | -0.3999895 | 1.69E-08   | 0.40198436 | 1.41E-08   |
| 0.05296325 | 0.47399244 | -0.1257286 | 0.08814282 | 0.33768356 | 2.59E-06   |
| -0.0466844 | 0.52802916 | 0.02925199 | 0.69265248 | -0.2445653 | 0.00079366 |
| 0.34033227 | 2.14E-06   | 0.02544699 | 0.730977   | -0.3630718 | 3.79E-07   |
| 0.17054394 | 0.02028923 | 0.02098839 | 0.77674051 | 0.08481796 | 0.25101008 |
| -0.114746  | 0.11987996 | -0.1111031 | 0.13217305 | -0.1670112 | 0.02307544 |
| 0.39416532 | 2.84E-08   | 0.10264574 | 0.164424   | -0.1170472 | 0.11258446 |
| -0.3324906 | 3.77E-06   | -0.2240582 | 0.00216985 | 0.38108035 | 8.73E-08   |
| -0.2946329 | 4.68E-05   | -0.3628871 | 3.85E-07   | 0.05327272 | 0.47140939 |
| -0.2352222 | 0.00126844 | 0.0152692  | 0.83656596 | -0.4583582 | 5.35E-11   |
| -0.058422  | 0.42957773 | -0.1628346 | 0.0267889  | 0.14905067 | 0.04287839 |
| 0.22836883 | 0.00176889 | -0.0390346 | 0.59782505 | -0.302711  | 2.81E-05   |
| 0.25101196 | 0.00056825 | -0.0090892 | 0.90227206 | 0.10749114 | 0.1452956  |
| 0.01557694 | 0.83331961 | -0.13949   | 0.05826774 | 0.13810353 | 0.06083779 |
| -0.2085247 | 0.00439397 | -0.1092355 | 0.13883953 | -0.2492211 | 0.00062406 |
| -0.1211864 | 0.10034102 | -0.0244364 | 0.74127385 | -0.2365308 | 0.0011891  |
| 0.16060163 | 0.02897634 | -0.03768   | 0.61060414 | 0.08716197 | 0.23810276 |
| -0.0005999 | 0.99353367 | -0.0142245 | 0.84760693 | -0.2418792 | 0.00090987 |
| 0.03535132 | 0.63284931 | 0.03118674 | 0.67345357 | -0.3749214 | 1.46E-07   |
| -0.0449906 | 0.54312215 | -0.0166785 | 0.82172187 | -0.3476643 | 1.24E-06   |
| -0.003792  | 0.95914442 | -0.0829041 | 0.26190164 | 0.30878041 | 1.90E-05   |
| -0.1411551 | 0.05530013 | -0.059741  | 0.419217   | 0.09204404 | 0.21272918 |
| -0.2356607 | 0.00124133 | -0.0508821 | 0.49156174 | -0.3560955 | 6.54E-07   |
| -0.2456904 | 0.00074918 | -0.1839821 | 0.01217939 | -0.2058722 | 0.00493317 |
| 0.16621647 | 0.02374575 | 0.19862786 | 0.00672063 | -0.2561252 | 0.00043326 |
| -0.0216595 | 0.7697983  | -0.1222979 | 0.09723924 | 0.21679138 | 0.00303641 |
| -0.1375439 | 0.06190121 | -0.0438838 | 0.55309784 | -0.1455522 | 0.04805904 |
| 0.19694954 | 0.00720934 | 0.10852369 | 0.14144709 | -0.1482106 | 0.04407759 |
| -0.274169  | 0.00015908 | -0.416938  | 3.56E-09   | 0.23818512 | 0.00109531 |
| -0.1003458 | 0.17413609 | -0.1036128 | 0.16046328 | 0.09029162 | 0.22160434 |
| 0.25051889 | 0.00058313 | 0.09133929 | 0.21626731 | 0.30601514 | 2.27E-05   |

|            |            |            |            |            |            |
|------------|------------|------------|------------|------------|------------|
| -0.1338577 | 0.06929288 | -0.1629111 | 0.02671652 | -0.159955  | 0.0296376  |
| -0.2987792 | 3.61E-05   | -0.2481893 | 0.00065846 | 0.26306443 | 0.00029718 |
| -0.4510708 | 1.17E-10   | -0.3124557 | 1.49E-05   | -0.2045375 | 0.00522633 |
| -0.0543988 | 0.46207563 | -0.1335069 | 0.07003239 | -0.2933241 | 5.08E-05   |
| -0.2918714 | 5.55E-05   | -0.2653812 | 0.00026143 | 0.26193445 | 0.00031622 |
| -0.1194816 | 0.10524973 | -0.2210605 | 0.00249565 | 0.3962484  | 2.36E-08   |
| 0.17915553 | 0.01468574 | -0.0003483 | 0.99624551 | -0.1559392 | 0.03403892 |
| -0.153106  | 0.03746734 | -0.1461939 | 0.04707149 | 0.24520068 | 0.00076825 |
| 0.22508857 | 0.00206714 | -0.0686763 | 0.35295907 | 0.25235099 | 0.00052957 |
| -0.3256836 | 6.08E-06   | -0.2625816 | 0.00030518 | 0.11861066 | 0.10782941 |
| -0.3108777 | 1.66E-05   | -0.2371345 | 0.00115405 | 0.0784317  | 0.28860282 |
| -0.0048642 | 0.94760724 | 0.03174431 | 0.6679589  | 0.14020882 | 0.05697089 |
| -0.0595374 | 0.42080724 | -0.1074434 | 0.14547529 | 0.40840012 | 7.89E-09   |
| -0.1673244 | 0.02281575 | -0.1409244 | 0.05570363 | 0.18330788 | 0.01250522 |
| -0.3576513 | 5.80E-07   | -0.3597133 | 4.93E-07   | 0.19908529 | 0.00659266 |
| 0.07018886 | 0.34243115 | -0.0427484 | 0.56342288 | 0.25867329 | 0.0003777  |
| 0.06484376 | 0.38053229 | 0.10985178 | 0.1366119  | 0.31424886 | 1.32E-05   |
| 0.01022107 | 0.89017484 | 0.00106262 | 0.98854659 | -0.3016201 | 3.02E-05   |
| -0.1372132 | 0.0625367  | -0.1716899 | 0.0194503  | 0.17308911 | 0.01846687 |
| -0.2063024 | 0.00484188 | -0.1040382 | 0.15874381 | -0.2292228 | 0.00169796 |
| -0.1791403 | 0.01469434 | -0.0953068 | 0.1968889  | -0.2277503 | 0.00182193 |
| -0.1412556 | 0.05512499 | -0.2433544 | 0.00084424 | 0.20641815 | 0.00481758 |
| -0.3173913 | 1.07E-05   | -0.3195783 | 9.25E-06   | 0.21370246 | 0.00349151 |
| -0.0917936 | 0.21398198 | -0.0610019 | 0.40945111 | 0.07002502 | 0.34356185 |
| -0.030982  | 0.67547571 | -0.0543715 | 0.46230049 | -0.2204889 | 0.00256259 |
| -0.0643584 | 0.38411563 | -0.2230794 | 0.00227171 | 0.18220853 | 0.01305292 |
| 0.12582875 | 0.08788789 | -0.0179066 | 0.80883884 | 0.33786464 | 2.56E-06   |
| 0.048554   | 0.51162024 | -0.0894315 | 0.22605546 | 0.17166522 | 0.01946805 |
| -0.1650964 | 0.02471888 | -0.1727727 | 0.01868541 | 0.26186381 | 0.00031745 |
| -0.045039  | 0.54268774 | -0.1732555 | 0.01835288 | 0.52613725 | 1.46E-14   |
| 0.32547967 | 6.16E-06   | 0.30996284 | 1.76E-05   | -0.2221799 | 0.00236913 |
| -0.247181  | 0.00069377 | -0.3054592 | 2.36E-05   | 0.34977258 | 1.06E-06   |
| -0.0791486 | 0.28420465 | -0.0997782 | 0.17659739 | 0.32854302 | 4.98E-06   |
| -0.0543724 | 0.46229343 | -0.1187768 | 0.10733362 | 0.09753032 | 0.18659627 |
| -0.0180475 | 0.80736396 | -0.0597663 | 0.41901968 | 0.17874692 | 0.01491729 |
| -0.2087361 | 0.00435338 | -0.1621442 | 0.02744963 | 0.17756715 | 0.01560385 |
| -0.0458104 | 0.53579066 | -0.1077063 | 0.14448717 | 0.15007894 | 0.04144785 |
| -0.2761723 | 0.00014171 | -0.2850088 | 8.42E-05   | -0.4537203 | 8.81E-11   |
| 0.19658022 | 0.00732103 | -0.0415396 | 0.57451651 | -0.3412304 | 2.00E-06   |
| 0.30665912 | 2.18E-05   | 0.27949639 | 0.00011674 | 0.17271071 | 0.01872848 |
| -0.2090053 | 0.00430216 | -0.2922461 | 5.43E-05   | 0.31728531 | 1.08E-05   |
| 0.18367745 | 0.01232569 | 0.03821671 | 0.60552682 | 0.17844055 | 0.015093   |
| -0.0281802 | 0.70337437 | -0.0862321 | 0.24316609 | 0.21678879 | 0.00303677 |
| -0.1164982 | 0.11429263 | -0.1011496 | 0.17069472 | 0.1862533  | 0.01113607 |
| -0.157982  | 0.03173526 | -0.1689037 | 0.02154442 | 0.12185748 | 0.09845901 |
| -0.2932943 | 5.09E-05   | -0.1635726 | 0.02609775 | -0.2235479 | 0.00222243 |

|            |            |            |            |            |            |
|------------|------------|------------|------------|------------|------------|
| 0.23381933 | 0.00135885 | -0.0868668 | 0.23970217 | 0.03293074 | 0.656326   |
| 0.10943361 | 0.1381205  | 0.01360632 | 0.85415459 | -0.0343146 | 0.64286158 |
| 0.60233655 | 1.19E-19   | 0.42049301 | 2.54E-09   | -0.2643099 | 0.00027744 |
| 0.42425198 | 1.77E-09   | 0.37214796 | 1.83E-07   | -0.1528044 | 0.03784879 |
| -0.2036988 | 0.00541846 | -0.2182121 | 0.0028457  | -0.3346761 | 3.22E-06   |
| 0.31142265 | 1.60E-05   | 0.18562927 | 0.01141458 | -0.2500112 | 0.00059884 |
| 0.07339855 | 0.32075789 | -0.0239468 | 0.74627877 | -0.0430697 | 0.56049236 |
| -0.0457086 | 0.53669862 | -0.0366446 | 0.62045285 | -0.0497123 | 0.50158833 |
| -0.2858335 | 8.01E-05   | -0.1927237 | 0.00858268 | -0.0902514 | 0.22181084 |
| -0.0073691 | 0.92070004 | -0.0803224 | 0.27710094 | -0.1250941 | 0.08977187 |
| -0.0353697 | 0.63267212 | -0.0588488 | 0.42620907 | 0.22357815 | 0.00221928 |
| -0.1501344 | 0.04137179 | -0.2946934 | 4.66E-05   | 0.24254795 | 0.00087956 |
| -0.137665  | 0.06166978 | 0.00392779 | 0.95768265 | -0.2291303 | 0.00170552 |
| 0.32333594 | 7.15E-06   | 0.21855113 | 0.00280182 | -0.1301643 | 0.07740487 |
| -0.3619556 | 4.14E-07   | -0.2044061 | 0.00525603 | 0.4792271  | 5.17E-12   |
| -0.5224677 | 2.39E-14   | -0.2918781 | 5.55E-05   | -0.4527627 | 9.76E-11   |
| -0.1661735 | 0.02378243 | -0.1590519 | 0.03058256 | 0.07667416 | 0.29957708 |
| -0.1452205 | 0.04857625 | -0.2236761 | 0.00220912 | 0.33027201 | 4.41E-06   |
| -0.0095743 | 0.89708464 | 0.07928219 | 0.28339001 | -0.2419424 | 0.00090697 |
| -0.1084504 | 0.14171771 | -0.235472  | 0.00125292 | -0.4441481 | 2.41E-10   |
| -0.1943795 | 0.0080191  | -0.164391  | 0.02534918 | 0.19653104 | 0.00733602 |
| 0.06975951 | 0.34539919 | 0.16788545 | 0.02235689 | -0.3033305 | 2.70E-05   |
| 0.03622607 | 0.62445315 | -0.0049979 | 0.94616857 | -0.1400176 | 0.0573135  |
| -0.0786009 | 0.28756068 | -0.1534331 | 0.03705717 | 0.14001493 | 0.05731832 |
| 0.43452236 | 6.42E-10   | 0.45712249 | 6.12E-11   | -0.3863106 | 5.60E-08   |
| 0.02879685 | 0.69719814 | -0.10959   | 0.13755476 | 0.21956737 | 0.00267394 |
| 0.12906025 | 0.07997329 | -0.0104464 | 0.88776961 | 0.20158045 | 0.00593211 |
| -0.065889  | 0.37288527 | 0.0576098  | 0.43603026 | 0.25001861 | 0.00059861 |
| 0.01738771 | 0.81427605 | -0.0440205 | 0.55186098 | 0.21012133 | 0.00409555 |
| -0.0145464 | 0.84420136 | 0.07836144 | 0.28903631 | -0.2795977 | 0.00011605 |
| 0.18734334 | 0.0106639  | 0.16010578 | 0.02948226 | -0.2584032 | 0.00038326 |
| -0.0769712 | 0.29770319 | 0.15910107 | 0.0305305  | -0.3256826 | 6.08E-06   |
| -0.2116931 | 0.00381971 | -0.1026017 | 0.16460606 | 0.0402195  | 0.58674667 |
| 0.24764397 | 0.00067735 | 0.17700756 | 0.01593902 | -0.2710628 | 0.00018998 |
| -0.0025234 | 0.97280585 | -0.127359  | 0.08406534 | 0.08588086 | 0.24509838 |
| 0.03198785 | 0.66556446 | -0.0541979 | 0.46373353 | 0.08060773 | 0.27539237 |
| 0.31426575 | 1.32E-05   | 0.0030331  | 0.96731579 | -0.102277  | 0.16595327 |
| -0.0730425 | 0.32311703 | 0.1034928  | 0.16095089 | -0.313622  | 1.38E-05   |
| -0.112212  | 0.12833252 | -0.1604946 | 0.02908491 | 0.17575975 | 0.01670911 |
| -0.1734787 | 0.01820086 | -0.2795364 | 0.00011647 | 0.19154888 | 0.00900356 |
| -0.4276634 | 1.27E-09   | -0.3240961 | 6.78E-06   | 0.33427597 | 3.31E-06   |
| 0.18464957 | 0.01186422 | 0.00534526 | 0.94243393 | -0.0757895 | 0.30520424 |
| -0.1757629 | 0.01670712 | -0.1186237 | 0.10779049 | -0.2730114 | 0.00017    |
| -0.0628682 | 0.3952442  | -0.166499  | 0.02350552 | 0.19355727 | 0.00829472 |
| -0.1707446 | 0.02014008 | -0.0676651 | 0.36010991 | 0.13635326 | 0.06421449 |
| 0.45236222 | 1.02E-10   | 0.26375495 | 0.00028608 | -0.3578421 | 5.71E-07   |

|            |            |            |            |            |            |
|------------|------------|------------|------------|------------|------------|
| -0.0640563 | 0.3863559  | -0.2467386 | 0.00070981 | 0.13197553 | 0.07333571 |
| -0.0829312 | 0.26174563 | -0.156796  | 0.03305604 | 0.19439085 | 0.00801536 |
| 0.156871   | 0.03297111 | -0.0406297 | 0.58293342 | -0.2404697 | 0.00097693 |
| -0.0349861 | 0.63636912 | 0.06712706 | 0.36395071 | -0.2294621 | 0.00167856 |
| -0.0789242 | 0.2855763  | -0.1146772 | 0.12010353 | 0.18823168 | 0.01029226 |
| -0.1097491 | 0.13698114 | -0.1334027 | 0.0702533  | 0.08212998 | 0.26639804 |
| -0.1947805 | 0.00788767 | -0.1852532 | 0.01158537 | 0.13135434 | 0.07471124 |
| -0.1476302 | 0.04492243 | -0.1750994 | 0.01712962 | 0.09509163 | 0.19790639 |
| 0.05146712 | 0.48658849 | -0.1271664 | 0.08453881 | 0.20625388 | 0.0048521  |
| 0.05068739 | 0.49322352 | 0.08427397 | 0.25407348 | 0.13335984 | 0.07034424 |
| -0.0913215 | 0.21635732 | -0.1248223 | 0.09047697 | 0.12133219 | 0.09992968 |
| 0.03961222 | 0.59241284 | -0.0665383 | 0.36818258 | 0.3173224  | 1.08E-05   |
| 0.15019232 | 0.0412926  | 0.02830371 | 0.70213548 | 0.2377197  | 0.00112099 |
| 0.31120526 | 1.62E-05   | 0.08535251 | 0.24802473 | -0.3086487 | 1.92E-05   |
| 0.12397007 | 0.09271663 | 0.18858611 | 0.0101472  | -0.2757625 | 0.00014511 |
| 0.18846079 | 0.01019829 | 0.09412191 | 0.20253927 | -0.3409513 | 2.04E-06   |
| -0.1581536 | 0.03154793 | 0.01109347 | 0.88086765 | 0.23114202 | 0.00154794 |
| -0.0389226 | 0.59887731 | -0.1471221 | 0.04567306 | 0.19901247 | 0.00661288 |
| 0.18407836 | 0.01213349 | 0.08569391 | 0.2461311  | 0.06764481 | 0.36025395 |
| -0.0611731 | 0.40813531 | -0.010567  | 0.8864823  | 0.30514784 | 2.41E-05   |
| -0.0873537 | 0.23706777 | -0.0102163 | 0.8902259  | 0.28164446 | 0.00010287 |
| -0.0836894 | 0.25739417 | -0.190026  | 0.00957631 | 0.11152754 | 0.13069268 |
| -0.1290331 | 0.0800372  | -0.0893488 | 0.22648673 | 0.01317152 | 0.85876575 |
| -0.0346401 | 0.63971027 | -0.0992524 | 0.17889993 | 0.20235654 | 0.00573908 |
| -0.0246064 | 0.73953759 | 0.10471077 | 0.15605369 | 0.05885965 | 0.42612396 |
| 0.03582047 | 0.62834034 | -0.0766776 | 0.29955551 | 0.20126138 | 0.00601315 |
| -0.1840896 | 0.01212814 | -0.1016838 | 0.16843585 | -0.0534085 | 0.47027866 |
| -0.0832358 | 0.25999117 | -0.1272576 | 0.08431424 | 0.2245355  | 0.00212171 |
| -0.2967617 | 4.10E-05   | -0.2159122 | 0.00316014 | -0.1173051 | 0.11178915 |
| -0.0704501 | 0.34063329 | -0.0209528 | 0.77710859 | -0.2597302 | 0.00035666 |
| -0.2679288 | 0.00022676 | -0.3027658 | 2.80E-05   | 0.13843474 | 0.06021552 |
| 0.13700398 | 0.06294161 | 0.0856582  | 0.24632871 | -0.3365767 | 2.81E-06   |
| -0.2706423 | 0.00019457 | -0.3750152 | 1.45E-07   | 0.09829553 | 0.18314694 |
| -0.2891716 | 6.55E-05   | -0.3186568 | 9.84E-06   | 0.42377225 | 1.85E-09   |
| -0.0989011 | 0.18045039 | -0.1821962 | 0.01305916 | -0.1844842 | 0.01194165 |
| -0.0811843 | 0.27196174 | -0.2253641 | 0.00204043 | -0.3427537 | 1.79E-06   |
| 0.15588886 | 0.0340974  | -0.0416963 | 0.57307232 | 0.16807928 | 0.02220022 |
| -0.1972166 | 0.00712951 | -0.2369855 | 0.00116261 | 0.30899732 | 1.87E-05   |
| 0.28062203 | 0.00010927 | 0.05727624 | 0.43869616 | -0.3104214 | 1.71E-05   |
| -0.0458846 | 0.53512965 | -0.1190776 | 0.10644032 | -0.0969599 | 0.18919845 |
| -0.1663275 | 0.02365109 | -0.2373045 | 0.00114435 | 0.38968569 | 4.19E-08   |
| 0.16609661 | 0.02384829 | 0.29334068 | 5.07E-05   | -0.3526317 | 8.53E-07   |
| -0.1015454 | 0.169019   | -0.1459668 | 0.04741906 | 0.3170753  | 1.10E-05   |
| 0.0471264  | 0.52412619 | 0.00946714 | 0.89823033 | 0.24697638 | 0.00070115 |
| 0.1681817  | 0.02211783 | 0.14573009 | 0.04778357 | -0.2364272 | 0.00119521 |
| -0.3317971 | 3.96E-06   | -0.3056706 | 2.33E-05   | -0.1227692 | 0.09594713 |

|            |            |            |            |            |            |
|------------|------------|------------|------------|------------|------------|
| -0.0898999 | 0.2236238  | -0.0859445 | 0.24474733 | 0.20007052 | 0.00632438 |
| -0.3543998 | 7.45E-07   | -0.2852816 | 8.28E-05   | 0.39717678 | 2.17E-08   |
| -0.2701158 | 0.00020046 | -0.2300654 | 0.00163054 | -0.2183772 | 0.00282425 |
| -0.1852713 | 0.01157708 | -0.1728558 | 0.0186278  | 0.09915666 | 0.17932152 |
| 0.40272436 | 1.32E-08   | 0.20983878 | 0.00414699 | 0.31006312 | 1.75E-05   |
| -0.1935911 | 0.00828321 | -0.1679245 | 0.02232521 | 0.164412   | 0.02533026 |
| -0.154822  | 0.03535761 | -0.1652652 | 0.02457009 | 0.17077576 | 0.02011704 |
| 0.0642896  | 0.38462505 | -0.0137845 | 0.85226614 | 0.16811408 | 0.02217219 |
| -0.2518808 | 0.00054286 | -0.1087124 | 0.14075218 | -0.1436319 | 0.05111775 |
| 0.10880281 | 0.14042023 | 0.02154397 | 0.77099217 | -0.3741439 | 1.55E-07   |
| -0.3106893 | 1.68E-05   | -0.2825674 | 9.74E-05   | -0.2070407 | 0.00468872 |
| -0.1530395 | 0.03755111 | 0.06918546 | 0.34939276 | -0.1891648 | 0.00991424 |
| 0.00952154 | 0.89764875 | -0.0642787 | 0.38470605 | -0.2991304 | 3.53E-05   |
| -0.0884026 | 0.2314624  | -0.1421943 | 0.05351203 | 0.24769734 | 0.00067548 |
| -0.047343  | 0.52221923 | -0.090899  | 0.21849902 | 0.2055857  | 0.00499484 |
| 0.12101076 | 0.10083813 | -0.0104033 | 0.88822975 | 0.03576833 | 0.62884073 |
| -0.2918941 | 5.54E-05   | -0.2766874 | 0.00013754 | 0.37836764 | 1.09E-07   |
| -0.088563  | 0.23061376 | -0.1052421 | 0.1539527  | 0.25057124 | 0.00058154 |
| 0.05717337 | 0.43952019 | 0.01070671 | 0.8849919  | 0.3250406  | 6.35E-06   |
| -0.0557201 | 0.4512552  | -0.1222824 | 0.09728193 | 0.37633677 | 1.30E-07   |
| -0.2393362 | 0.00103411 | -0.1839533 | 0.01219316 | 0.17845904 | 0.01508234 |
| 0.04603303 | 0.53380832 | -0.0173601 | 0.81456559 | 0.19454525 | 0.00796455 |
| -0.1745962 | 0.01745617 | -0.0415423 | 0.57449133 | -0.2738036 | 0.00016246 |
| -0.4227584 | 2.04E-09   | -0.2989824 | 3.57E-05   | 0.42130212 | 2.35E-09   |
| -0.29448   | 4.73E-05   | -0.2390764 | 0.00104764 | 0.10118135 | 0.17055991 |
| 0.10325435 | 0.16192295 | 0.14076393 | 0.05598579 | -0.3385583 | 2.43E-06   |
| -0.0162491 | 0.82623862 | -0.0045976 | 0.95047476 | -0.1848486 | 0.01177162 |
| -0.0781627 | 0.29026483 | -0.1277521 | 0.08310501 | 0.24687087 | 0.00070498 |
| -0.1770924 | 0.0158878  | -0.0946871 | 0.19982974 | -0.2544673 | 0.00047337 |
| 0.14326069 | 0.05172737 | -0.0166386 | 0.82214139 | 0.15319831 | 0.03735116 |
| 0.11444122 | 0.12087313 | 0.00515994 | 0.94442644 | 0.15671182 | 0.03315148 |
| -0.0995554 | 0.17757012 | -0.1016694 | 0.1684963  | -0.0504613 | 0.49515595 |
| -0.1016921 | 0.16840079 | -0.098511  | 0.18218424 | 0.16465307 | 0.02511346 |
| 0.17378356 | 0.01799501 | 0.11705861 | 0.11254932 | -0.1815703 | 0.01338047 |
| 0.15564154 | 0.03438611 | 0.01365497 | 0.85363896 | 0.15847726 | 0.03119718 |
| -0.1956222 | 0.007618   | -0.1567272 | 0.03313401 | -0.3748377 | 1.47E-07   |
| -0.0779327 | 0.29169076 | 0.00970399 | 0.89569858 | -0.0776773 | 0.29328031 |
| 0.16568567 | 0.02420274 | 0.06936953 | 0.34810911 | 0.03263706 | 0.65919794 |
| -0.077178  | 0.29640315 | -0.13684   | 0.06326049 | 0.41717592 | 3.48E-09   |
| -0.1859293 | 0.01127993 | -0.2299056 | 0.00164314 | 0.03291648 | 0.65646531 |
| 0.14033352 | 0.05674836 | 0.06014403 | 0.4160809  | -0.2618949 | 0.00031691 |
| -0.1652718 | 0.02456429 | -0.2483361 | 0.00065347 | 0.04388031 | 0.55312942 |
| -0.1162953 | 0.11492914 | -0.0629778 | 0.39441912 | 0.05652169 | 0.44476085 |
| -0.2352492 | 0.00126675 | -0.0788788 | 0.28585464 | -0.199631  | 0.00644283 |
| -0.0038502 | 0.95851795 | 0.03595069 | 0.62709117 | -0.3588891 | 5.26E-07   |
| -0.3105884 | 1.69E-05   | -0.0646117 | 0.38224306 | -0.3657122 | 3.07E-07   |

|            |            |            |            |            |            |
|------------|------------|------------|------------|------------|------------|
| 0.13529166 | 0.06633631 | 0.0576433  | 0.43576304 | 0.10778982 | 0.14417428 |
| -0.1845028 | 0.01193288 | -0.1166155 | 0.11392619 | 0.16162659 | 0.02795403 |
| -0.0725928 | 0.32611341 | 0.10101771 | 0.171256   | -0.4131052 | 5.10E-09   |
| 0.08161988 | 0.26938939 | -0.0697715 | 0.34531641 | 0.17041234 | 0.02038755 |
| 0.1651425  | 0.02467819 | 0.08953487 | 0.22551717 | 0.15314939 | 0.03741268 |
| 0.07235405 | 0.3277111  | -0.0268444 | 0.71681868 | 0.10909664 | 0.13934539 |
| -0.0638874 | 0.3876124  | -0.0795007 | 0.28206075 | 0.23277879 | 0.00142968 |
| -0.2445004 | 0.0007963  | -0.21944   | 0.00268968 | 0.29125264 | 5.77E-05   |
| 0.52154729 | 2.70E-14   | 0.44805789 | 1.60E-10   | -0.2019898 | 0.00582959 |
| 0.04303092 | 0.56084537 | -0.0404115 | 0.58496054 | -0.4102489 | 6.65E-09   |
| -0.2215179 | 0.00244322 | -0.1657841 | 0.02411743 | 0.42971701 | 1.03E-09   |
| -0.3055202 | 2.35E-05   | -0.2647019 | 0.00027148 | 0.3107047  | 1.67E-05   |
| -0.3218463 | 7.92E-06   | -0.0756819 | 0.30589323 | -0.0917686 | 0.21410719 |
| -0.3381884 | 2.50E-06   | -0.2433285 | 0.00084536 | 0.02169067 | 0.76947645 |
| 0.08484407 | 0.25086367 | 0.02027095 | 0.78418138 | -0.2963496 | 4.21E-05   |
| -0.2773157 | 0.00013261 | -0.2934933 | 5.02E-05   | 0.0078802  | 0.91521937 |
| -0.242487  | 0.00088228 | -0.2509102 | 0.00057129 | 0.19330775 | 0.00838001 |
| -0.21383   | 0.00347157 | -0.0527281 | 0.47596016 | 0.19418295 | 0.00808424 |
| -0.2561737 | 0.00043213 | -0.1743071 | 0.01764624 | 0.20345341 | 0.00547584 |
| -0.2959704 | 4.31E-05   | -0.3453074 | 1.48E-06   | 0.30734267 | 2.09E-05   |
| -0.0190327 | 0.79706982 | -0.1737033 | 0.018049   | 0.13548272 | 0.06595026 |
| -0.496506  | 6.60E-13   | -0.4074708 | 8.59E-09   | -0.4565258 | 6.53E-11   |
| -0.0085982 | 0.90752729 | -0.0917028 | 0.21443719 | -0.2992737 | 3.50E-05   |
| -0.1861286 | 0.01119125 | -0.2017383 | 0.00589239 | 0.42342989 | 1.91E-09   |
| -0.0813801 | 0.27080365 | -0.0998625 | 0.17623003 | 0.30020428 | 3.30E-05   |
| -0.055814  | 0.45049133 | -0.1465677 | 0.0465041  | 0.39798591 | 2.02E-08   |
| 0.07111916 | 0.33605586 | -0.0320381 | 0.66507094 | 0.21168555 | 0.003821   |
| -0.1494115 | 0.04237169 | -0.0220158 | 0.76612001 | -0.3365221 | 2.82E-06   |
| -0.4412331 | 3.25E-10   | -0.2592687 | 0.00036571 | -0.3317426 | 3.97E-06   |
| 0.2404884  | 0.00097601 | 0.01857431 | 0.80185494 | 0.28250844 | 9.77E-05   |
| -0.378378  | 1.09E-07   | -0.4158864 | 3.93E-09   | 0.20742469 | 0.00461081 |
| -0.1468235 | 0.04611923 | -0.1348073 | 0.0673233  | -0.2009515 | 0.0060928  |
| 0.00586638 | 0.93683282 | -0.0070407 | 0.92422264 | -0.3565984 | 6.29E-07   |
| -0.2496626 | 0.00060985 | -0.0964979 | 0.19132524 | -0.3756856 | 1.37E-07   |
| -0.030553  | 0.67972009 | 0.05224799 | 0.479992   | -0.2427704 | 0.00086969 |
| 0.06587823 | 0.37296357 | 0.07902746 | 0.28494463 | -0.3507385 | 9.85E-07   |
| 0.20744736 | 0.00460624 | 0.05274867 | 0.47578806 | -0.0937816 | 0.20418358 |
| -0.1675632 | 0.02261943 | -0.0802382 | 0.27760668 | -0.325183  | 6.29E-06   |
| 0.0187119  | 0.8004178  | -0.044344  | 0.54893897 | 0.14459574 | 0.04956293 |
| -0.2886124 | 6.77E-05   | -0.0843596 | 0.25358951 | -0.162046  | 0.02754469 |
| -0.2616219 | 0.00032168 | -0.0802362 | 0.27761843 | -0.0965817 | 0.19093829 |
| -0.1922117 | 0.0087639  | -0.1338605 | 0.06928699 | 0.1453519  | 0.04837079 |
| -0.1676306 | 0.02256433 | -0.1185322 | 0.10806436 | -0.0691244 | 0.34981947 |
| 0.36183432 | 4.18E-07   | 0.21212685 | 0.0037466  | -0.3072334 | 2.10E-05   |
| 0.0116759  | 0.87466289 | -0.1101188 | 0.13565527 | 0.17359292 | 0.01812349 |
| -0.01849   | 0.80273545 | -0.0861136 | 0.24381671 | 0.21671086 | 0.00304755 |



|            |            |            |            |            |            |
|------------|------------|------------|------------|------------|------------|
| 0.16612877 | 0.02382074 | 0.08386547 | 0.25639084 | -0.2390058 | 0.00105135 |
| -0.0894516 | 0.22595056 | -0.1147174 | 0.119973   | -0.2815768 | 0.00010328 |
| -0.3371286 | 2.70E-06   | -0.2693084 | 0.00020982 | 0.32670916 | 5.66E-06   |
| -0.2324515 | 0.00145265 | -0.2956389 | 4.40E-05   | 0.23353671 | 0.00137776 |
| 0.07221934 | 0.32861486 | -0.0465155 | 0.52952502 | 0.23351354 | 0.00137932 |
| -0.178425  | 0.01510199 | -0.2383828 | 0.00108457 | 0.06338548 | 0.3913594  |
| -0.2594434 | 0.00036226 | -0.1826603 | 0.01282537 | -0.0139285 | 0.85074075 |
| -0.2119768 | 0.00377175 | -0.0892848 | 0.22682059 | -0.1524595 | 0.03828921 |
| 0.1224133  | 0.09692158 | 0.12409537 | 0.09238462 | -0.1940299 | 0.00813529 |
| -0.0209431 | 0.77720979 | -0.0982556 | 0.18332553 | 0.21091365 | 0.00395434 |
| 0.06202607 | 0.40161768 | -0.0474789 | 0.52102367 | 0.23422404 | 0.00133218 |
| 0.04575976 | 0.5362421  | 0.23265378 | 0.00143841 | -0.2809665 | 0.00010707 |
| 0.00538032 | 0.94205696 | -0.1681939 | 0.02210802 | 0.2125994  | 0.00366839 |
| 0.13231572 | 0.07259116 | 0.00598874 | 0.93551809 | 0.29886969 | 3.59E-05   |
| -0.5568307 | 1.86E-16   | -0.2583427 | 0.00038452 | 0.15411261 | 0.03621724 |
| 0.28494231 | 8.45E-05   | 0.25053787 | 0.00058255 | 0.41384735 | 4.76E-09   |
| -0.0620824 | 0.40118983 | -0.0459552 | 0.53450081 | 0.24433795 | 0.00080294 |
| -0.0885516 | 0.23067377 | -0.100708  | 0.17257912 | 0.28905855 | 6.59E-05   |
| 0.22110161 | 0.00249089 | 0.0935895  | 0.205116   | 0.16924579 | 0.02127723 |
| -0.0641689 | 0.38552007 | -0.1147465 | 0.11987849 | 0.2784981  | 0.00012377 |
| -0.3252106 | 6.28E-06   | -0.3512153 | 9.50E-07   | 0.39292081 | 3.16E-08   |
| -0.1610548 | 0.02852048 | -0.1665209 | 0.02348701 | 0.20049798 | 0.00621105 |
| 0.01588881 | 0.83003243 | 0.02454798 | 0.74013421 | 0.40079415 | 1.57E-08   |
| 0.04723764 | 0.52314622 | -0.0689468 | 0.35106173 | 0.22272369 | 0.00230979 |
| 0.00830662 | 0.91065022 | -0.039291  | 0.59541972 | 0.09079495 | 0.21902872 |
| 0.0983353  | 0.18296896 | 0.11427917 | 0.12140377 | 0.28130253 | 0.00010497 |
| 0.21142129 | 0.00386619 | 0.05842908 | 0.42952187 | 0.31410192 | 1.34E-05   |
| 0.01058228 | 0.88631939 | -0.0900888 | 0.22264848 | 0.11149749 | 0.13079707 |
| 0.14728063 | 0.0454378  | 0.11763582 | 0.11077545 | -0.2040497 | 0.00533731 |
| -0.1375969 | 0.06179979 | -0.2098241 | 0.00414968 | 0.20658891 | 0.00478192 |
| -0.0247771 | 0.73779711 | -0.0587011 | 0.42737366 | 0.23293706 | 0.00141869 |
| -0.0760751 | 0.30337967 | -0.1076993 | 0.1445134  | 0.27082694 | 0.00019254 |
| -0.2643407 | 0.00027696 | -0.1082044 | 0.14262891 | 0.09934046 | 0.17851271 |
| 0.00157175 | 0.98305962 | 0.02265141 | 0.75957143 | -0.2959646 | 4.31E-05   |
| 0.04392354 | 0.55273816 | -0.0700801 | 0.34318153 | 0.10001287 | 0.17557671 |
| -0.0725388 | 0.32647438 | -0.003523  | 0.96204025 | -0.1134792 | 0.12404994 |
| 0.10566186 | 0.15230816 | -0.0202367 | 0.78453677 | 0.12102842 | 0.10078807 |
| -0.3335909 | 3.48E-06   | -0.225308  | 0.00204584 | 0.20953079 | 0.00420373 |
| -0.2137343 | 0.00348652 | -0.1244664 | 0.091407   | -0.3991903 | 1.82E-08   |
| -0.1091334 | 0.13921129 | -0.2435082 | 0.00083766 | -0.2683084 | 0.00022198 |
| -0.0834674 | 0.25866325 | -0.1278321 | 0.08291081 | 0.19742121 | 0.00706889 |
| -0.0725567 | 0.32635454 | -0.0709831 | 0.33698352 | 0.16906322 | 0.02141946 |
| -0.2606339 | 0.00033953 | -0.2040766 | 0.00533114 | -0.0793248 | 0.28313027 |
| -0.1911641 | 0.00914532 | -0.3153719 | 1.23E-05   | 0.00450347 | 0.95148746 |
| 0.1736861  | 0.01806059 | 0.03585194 | 0.62803836 | -0.2303794 | 0.00160604 |
| 0.14981166 | 0.04181579 | -0.0062448 | 0.93276718 | 0.22735    | 0.00185703 |

|            |            |            |            |            |            |
|------------|------------|------------|------------|------------|------------|
| -0.2131674 | 0.00357633 | -0.1532029 | 0.03734546 | -0.2496896 | 0.00060898 |
| -0.0134657 | 0.85564515 | -0.0686979 | 0.35280718 | 0.24040856 | 0.00097993 |
| 0.01998119 | 0.78719219 | -0.1299869 | 0.07781301 | 0.26619404 | 0.00024987 |
| -0.2697881 | 0.00020421 | -0.1353956 | 0.066126   | -0.1981714 | 0.00685054 |
| 0.35320779 | 8.16E-07   | 0.18333726 | 0.01249087 | -0.2338241 | 0.00135853 |
| -0.3263721 | 5.79E-06   | -0.2816429 | 0.00010288 | -0.2184477 | 0.00281514 |
| -0.3507006 | 9.88E-07   | -0.1408195 | 0.05588791 | -0.0502229 | 0.49719849 |
| -0.2801623 | 0.00011226 | -0.2053058 | 0.00505574 | 0.30385702 | 2.61E-05   |
| -0.1125815 | 0.12707219 | -0.1558986 | 0.0340861  | 0.14954102 | 0.04219113 |
| 0.17642908 | 0.01629209 | 0.16647226 | 0.02352819 | 0.30221558 | 2.90E-05   |
| 0.01328791 | 0.85753095 | -0.0671692 | 0.36364876 | 0.2287333  | 0.0017383  |
| -0.058201  | 0.43132794 | -0.1180705 | 0.10945401 | 0.24809584 | 0.00066167 |
| 0.13416287 | 0.06865489 | 0.16196056 | 0.02762766 | -0.2963566 | 4.20E-05   |
| -0.0956729 | 0.19516648 | -0.0768287 | 0.29860125 | 0.36874816 | 2.41E-07   |
| 0.04493565 | 0.54361514 | -0.2020869 | 0.0058055  | -0.1708621 | 0.02005324 |
| 0.04019342 | 0.58698946 | 0.00603932 | 0.93497466 | -0.2151325 | 0.00327367 |
| 0.03143578 | 0.67099721 | 0.07694316 | 0.29787974 | 0.38784035 | 4.91E-08   |
| 0.37976478 | 9.74E-08   | 0.12742844 | 0.08389497 | -0.3063159 | 2.23E-05   |
| -0.2852539 | 8.30E-05   | -0.2315712 | 0.0015161  | 0.31350579 | 1.39E-05   |
| -0.226113  | 0.00196942 | -0.1230671 | 0.09513754 | -0.2630606 | 0.00029725 |
| -0.2177135 | 0.00291135 | -0.2765562 | 0.00013859 | 0.27375131 | 0.00016294 |
| -0.003293  | 0.96451696 | 0.0059343  | 0.93610297 | -0.2461618 | 0.00073123 |
| -0.0315715 | 0.66965961 | -0.1626018 | 0.02701016 | 0.3787916  | 1.06E-07   |
| -0.1975412 | 0.00703355 | -0.2281166 | 0.00179035 | -0.42224   | 2.14E-09   |
| 0.08463966 | 0.25201132 | -0.0399095 | 0.58963593 | 0.20413361 | 0.00531808 |
| 0.03889955 | 0.59909384 | 0.08931479 | 0.22666422 | 0.05205989 | 0.48157657 |
| -0.1252138 | 0.08946277 | -0.0576309 | 0.43586204 | -0.3869824 | 5.29E-08   |
| -0.002615  | 0.97181885 | 0.05049791 | 0.49484307 | -0.1045836 | 0.15655958 |
| 0.04975237 | 0.50124285 | -0.0115842 | 0.87563888 | -0.0384478 | 0.60334675 |
| 0.14344592 | 0.05142247 | 0.01633809 | 0.82530217 | -0.3245032 | 6.59E-06   |
| -0.1027737 | 0.16389575 | -0.1587655 | 0.03088764 | -0.0599149 | 0.41786207 |
| -0.1174887 | 0.11122543 | -0.0232638 | 0.75327832 | -0.0213658 | 0.77283436 |
| 0.09811981 | 0.18393485 | 0.05509818 | 0.45633038 | -0.1023689 | 0.16557108 |
| 0.41009945 | 6.74E-09   | 0.24042865 | 0.00097895 | -0.0990661 | 0.17972082 |
| -0.2118829 | 0.00378757 | -0.1434365 | 0.0514379  | -0.1078772 | 0.14384752 |
| -0.1892501 | 0.00988032 | -0.1110409 | 0.13239103 | 0.07074663 | 0.33859966 |
| 0.00284665 | 0.96932393 | -0.1664849 | 0.02351748 | 0.08225267 | 0.26568196 |
| -0.1736634 | 0.01807591 | -0.1126226 | 0.12693242 | -0.2099189 | 0.00413236 |
| -0.2233041 | 0.00224795 | -0.1396921 | 0.0579007  | -0.2400673 | 0.00099689 |
| 0.03907349 | 0.59746014 | 0.01297744 | 0.86082566 | 0.14082077 | 0.05588572 |
| 0.25989138 | 0.00035355 | 0.16054525 | 0.0290335  | -0.3229597 | 7.34E-06   |
| -0.1766074 | 0.01618251 | -0.1283449 | 0.08167379 | -0.10837   | 0.14201493 |
| -0.2539371 | 0.00048691 | -0.1078012 | 0.14413157 | -0.1160776 | 0.11561501 |
| -0.1447311 | 0.0493477  | -0.2093541 | 0.00423659 | 0.07793138 | 0.29169914 |
| -0.1776344 | 0.01556396 | -0.2065232 | 0.00479561 | 0.19627687 | 0.00741393 |
| -0.0290438 | 0.69473042 | -0.090265  | 0.2217413  | 0.31526249 | 1.24E-05   |

|            |            |            |            |            |            |
|------------|------------|------------|------------|------------|------------|
| -0.1999738 | 0.00635028 | -0.2111037 | 0.00392113 | -0.253414  | 0.00050061 |
| -0.23825   | 0.00109177 | -0.0725347 | 0.32650147 | -0.4231063 | 1.97E-09   |
| -0.1562623 | 0.03366538 | -0.0157054 | 0.83196521 | 0.38895851 | 4.46E-08   |
| -0.3305903 | 4.31E-06   | -0.2337692 | 0.00136219 | 0.16613791 | 0.02381292 |
| -0.2061545 | 0.00487311 | -0.1670623 | 0.02303286 | 0.22819551 | 0.00178361 |
| -0.4047079 | 1.11E-08   | -0.2818752 | 0.00010147 | 0.33688633 | 2.75E-06   |
| -0.2881832 | 6.95E-05   | -0.3400005 | 2.19E-06   | 0.11723881 | 0.11199318 |
| -0.2884108 | 6.86E-05   | -0.2081854 | 0.00445985 | -0.2549484 | 0.00046139 |
| -0.2535856 | 0.00049608 | -0.159926  | 0.02966754 | -0.1180785 | 0.10942997 |
| -0.0775884 | 0.29383447 | -0.1775676 | 0.01560357 | 0.27316857 | 0.00016848 |
| 0.08513701 | 0.24922527 | 0.18779916 | 0.01047175 | 0.12346592 | 0.09406217 |
| -0.0318649 | 0.66677253 | -0.0239589 | 0.74615483 | 0.12576613 | 0.08804725 |
| -0.1704173 | 0.02038387 | -0.2152461 | 0.0032569  | -0.2722636 | 0.00017743 |
| 0.07822466 | 0.28988147 | 0.13697512 | 0.06299761 | -0.2803568 | 0.00011099 |
| 0.23462362 | 0.00130632 | 0.19660308 | 0.00731408 | -0.2950141 | 4.57E-05   |
| 0.04145889 | 0.57526061 | 0.0630022  | 0.39423564 | -0.0598955 | 0.41801306 |
| -0.0486082 | 0.5111483  | -0.0678492 | 0.35880104 | -0.1003761 | 0.17400568 |
| -0.1173159 | 0.11175591 | -0.0152652 | 0.8366087  | -0.2511062 | 0.00056544 |
| -0.0915849 | 0.21502972 | -0.0236854 | 0.74895534 | -0.3208711 | 8.47E-06   |
| -0.084744  | 0.25142498 | -0.002063  | 0.9777658  | -0.3280487 | 5.15E-06   |
| -0.1363215 | 0.06427711 | -0.0640901 | 0.38610523 | -0.2126306 | 0.00366327 |
| 0.07235665 | 0.32769365 | 0.05496061 | 0.45745736 | -0.2322709 | 0.00146546 |
| 0.07474412 | 0.31194245 | 0.10767387 | 0.1446088  | -0.0373099 | 0.61411666 |
| 0.10468673 | 0.15614926 | 0.10444893 | 0.15709691 | 0.06528855 | 0.37726658 |
| 0.41820255 | 3.15E-09   | 0.30948921 | 1.81E-05   | 0.02678548 | 0.71741362 |
| -0.1740796 | 0.01779709 | -0.2034643 | 0.00547329 | 0.44982172 | 1.33E-10   |
| -0.1744141 | 0.01757565 | -0.2427984 | 0.00086845 | 0.46960608 | 1.55E-11   |
| -0.1448832 | 0.04910683 | -0.152112  | 0.03873716 | -0.4503357 | 1.26E-10   |
| 0.31269204 | 1.47E-05   | 0.13379858 | 0.06941712 | -0.048482  | 0.51224744 |
| -0.4490193 | 1.45E-10   | -0.2612003 | 0.00032919 | 0.1889914  | 0.00998354 |
| 0.07565532 | 0.3060636  | -0.0045165 | 0.95134731 | 0.25604953 | 0.00043502 |
| 0.00519855 | 0.94401132 | -0.1544731 | 0.03577827 | 0.37658241 | 1.27E-07   |
| 0.18177896 | 0.01327258 | 0.09219361 | 0.21198365 | 0.34996758 | 1.04E-06   |
| -0.0870405 | 0.23875989 | -0.2666751 | 0.00024325 | 0.29454638 | 4.71E-05   |
| -0.0292645 | 0.69252764 | -0.1008403 | 0.17201322 | 0.19989795 | 0.00637065 |
| 0.05441222 | 0.4619649  | -0.0817882 | 0.26839992 | 0.29987419 | 3.37E-05   |
| -0.3367059 | 2.78E-06   | -0.2402677 | 0.0009869  | -0.3423918 | 1.84E-06   |
| -0.1058934 | 0.15140676 | -0.138498  | 0.06009721 | 0.21197587 | 0.00377191 |
| -0.5600953 | 1.14E-16   | -0.445461  | 2.10E-10   | 0.20516294 | 0.00508708 |
| -0.2593493 | 0.00036411 | -0.3274451 | 5.37E-06   | 0.22415867 | 0.00215964 |
| 0.14168883 | 0.05437572 | 0.01260782 | 0.86475113 | 0.30288189 | 2.78E-05   |
| 0.07306732 | 0.32295244 | -0.0275277 | 0.70993015 | 0.22333358 | 0.00224485 |
| -0.1470753 | 0.04574275 | -0.1970955 | 0.00716561 | 0.27136162 | 0.00018678 |
| 0.12925676 | 0.07951117 | 0.02339082 | 0.75197489 | 0.24860367 | 0.00064444 |
| 0.3638867  | 3.55E-07   | 0.25560394 | 0.00044552 | 0.22818647 | 0.00178438 |
| -0.198828  | 0.00666438 | -0.0513705 | 0.48740799 | 0.57083691 | 2.19E-17   |

|            |            |            |            |            |            |
|------------|------------|------------|------------|------------|------------|
| -0.2865368 | 7.68E-05   | -0.2918507 | 5.56E-05   | 0.38183647 | 8.19E-08   |
| -0.0296788 | 0.68839994 | -0.1268407 | 0.08534481 | 0.09935662 | 0.17844174 |
| -0.0745004 | 0.31352713 | -0.0729194 | 0.32393577 | 0.00464058 | 0.95001233 |
| -0.1028462 | 0.16359698 | -0.1371415 | 0.06267535 | -0.3004617 | 3.25E-05   |
| 0.15427359 | 0.03602065 | 0.05251321 | 0.47776255 | -0.2286585 | 0.00174453 |
| -0.376388  | 1.29E-07   | -0.3775628 | 1.17E-07   | 0.27293216 | 0.00017078 |
| -0.0620696 | 0.40128684 | -0.1675838 | 0.02260264 | 0.04978648 | 0.50094914 |
| 0.21598478 | 0.00314976 | 0.00990782 | 0.89352056 | 0.1206246  | 0.10193817 |
| -0.1524094 | 0.03835356 | -0.0841028 | 0.25504285 | -0.344159  | 1.61E-06   |
| 0.2122658  | 0.00372345 | 0.1528005  | 0.0378538  | 0.25814267 | 0.0003887  |
| 0.027749   | 0.70770414 | -0.0147912 | 0.84161374 | 0.26663776 | 0.00024376 |
| 0.23753999 | 0.00113105 | 0.08408578 | 0.25513928 | -0.2417158 | 0.00091742 |
| 0.08006417 | 0.27865328 | 0.1683989  | 0.02194396 | -0.1603966 | 0.02918463 |
| 0.09450966 | 0.2006775  | -0.0709844 | 0.33697484 | 0.09818088 | 0.18366071 |
| 0.1234712  | 0.09404801 | -0.0488166 | 0.50933718 | 0.16959503 | 0.02100743 |
| -0.0166521 | 0.82200021 | -0.0100439 | 0.89206728 | -0.1408993 | 0.05574762 |
| -0.0061424 | 0.93386775 | -0.0231162 | 0.75479323 | 0.34418083 | 1.61E-06   |
| -0.1474626 | 0.04516885 | 0.29604877 | 4.29E-05   | -0.2809094 | 0.00010743 |
| 0.29065505 | 5.98E-05   | 0.36286569 | 3.85E-07   | -0.4421248 | 2.97E-10   |
| 0.06377934 | 0.38841706 | -0.0268865 | 0.71639359 | 0.23989562 | 0.00100551 |
| -0.1324752 | 0.07224421 | -0.2423634 | 0.00088783 | 0.2598233  | 0.00035486 |
| -0.3791362 | 1.03E-07   | -0.371286  | 1.96E-07   | 0.46163745 | 3.75E-11   |
| 0.04303652 | 0.56079434 | -0.0357417 | 0.62909678 | 0.21395441 | 0.00345221 |
| 0.05546798 | 0.4533088  | -0.0219192 | 0.76711737 | 0.22506252 | 0.00206968 |
| 0.10808489 | 0.143073   | 0.36053779 | 4.63E-07   | -0.1325181 | 0.07215107 |
| 0.31186823 | 1.55E-05   | 0.02708414 | 0.71439908 | -0.3033856 | 2.69E-05   |
| -0.205451  | 0.00502407 | -0.1469928 | 0.04586584 | -0.3073022 | 2.09E-05   |
| 0.04947935 | 0.50359734 | -0.0703877 | 0.34106201 | 0.18276321 | 0.012774   |
| 0.61855881 | 6.47E-21   | 0.25126773 | 0.00056066 | -0.3331793 | 3.58E-06   |
| 0.03455521 | 0.64053165 | 0.00108807 | 0.98827232 | -0.005481  | 0.94097486 |
| -0.0377031 | 0.6103856  | -0.0531755 | 0.47221982 | 0.3808646  | 8.89E-08   |
| -0.437384  | 4.81E-10   | -0.3108172 | 1.66E-05   | 0.03540469 | 0.63233568 |
| -0.4224478 | 2.10E-09   | -0.2429761 | 0.00086065 | -0.2797982 | 0.00011469 |
| -0.2060997 | 0.0048847  | -0.1881628 | 0.01032064 | -0.3022227 | 2.90E-05   |
| -0.1958231 | 0.00755485 | -0.1326283 | 0.07191242 | -0.2518789 | 0.00054292 |
| -0.2293194 | 0.00169011 | -0.2339238 | 0.00135192 | 0.0810248  | 0.27290792 |
| -0.0370092 | 0.61697737 | -0.0162624 | 0.82609816 | -0.2882519 | 6.92E-05   |
| 0.05992802 | 0.41776025 | 0.04840429 | 0.51292443 | -0.4624203 | 3.44E-11   |
| 0.39379234 | 2.93E-08   | 0.2611815  | 0.00032953 | -0.2817    | 0.00010253 |
| -0.2760243 | 0.00014293 | -0.1594651 | 0.03014714 | -0.0845869 | 0.25230798 |
| -0.0805018 | 0.27602611 | -0.1142365 | 0.12154367 | -0.4036824 | 1.21E-08   |
| -0.3214395 | 8.14E-06   | -0.3323526 | 3.80E-06   | 0.40082491 | 1.57E-08   |
| 0.42052968 | 2.53E-09   | 0.35091517 | 9.72E-07   | -0.2101722 | 0.00408636 |
| 0.18185791 | 0.01323197 | 0.05054881 | 0.49440778 | -0.4026427 | 1.33E-08   |
| 0.01200426 | 0.87116826 | -0.0764513 | 0.30098842 | 0.23540566 | 0.00125703 |
| 0.47150047 | 1.25E-11   | 0.24561146 | 0.00075222 | -0.2648552 | 0.00026918 |

|            |            |            |            |            |            |
|------------|------------|------------|------------|------------|------------|
| -0.3771082 | 1.22E-07   | -0.2723328 | 0.00017673 | 0.17900044 | 0.01477326 |
| 0.01556445 | 0.83345131 | -0.0288476 | 0.69669082 | 0.26851211 | 0.00021945 |
| 0.2248251  | 0.00209297 | 0.1907706  | 0.00929236 | -0.3372816 | 2.67E-06   |
| -0.1917585 | 0.00892715 | -0.174612  | 0.01744584 | 0.14539003 | 0.04831133 |
| -0.2204479 | 0.00256745 | -0.3137167 | 1.37E-05   | 0.14750991 | 0.04509924 |
| -0.1108352 | 0.13311394 | -0.0996771 | 0.17703829 | -0.1847414 | 0.01182139 |
| 0.11578556 | 0.11654008 | -0.047518  | 0.52068049 | -0.2088623 | 0.0043293  |
| -0.1376728 | 0.06165492 | -0.0081429 | 0.91240457 | -0.3001649 | 3.31E-05   |
| -0.1493017 | 0.04252532 | -0.1016611 | 0.16853128 | -0.2884285 | 6.85E-05   |
| -0.0756998 | 0.30577862 | -0.0573303 | 0.43826352 | -0.2513478 | 0.00055831 |
| 0.05477641 | 0.45896867 | -0.1121477 | 0.12855298 | 0.07302024 | 0.32326515 |
| 0.15909413 | 0.03053785 | 0.00880159 | 0.9053502  | -0.2550101 | 0.00045988 |
| -0.2753265 | 0.00014882 | -0.144599  | 0.04955777 | -0.3103818 | 1.71E-05   |
| 0.17223933 | 0.01905885 | 0.135989   | 0.06493618 | 0.07396222 | 0.31704558 |
| -0.1521664 | 0.03866684 | -0.1626852 | 0.02693068 | 0.09830633 | 0.18309856 |
| -0.2381207 | 0.00109883 | -0.255081  | 0.00045814 | 0.14287018 | 0.05237512 |
| -0.2536821 | 0.00049355 | -0.1125355 | 0.12722846 | -0.2467489 | 0.00070943 |
| -0.0724379 | 0.32714953 | -0.0667856 | 0.3664012  | -0.1678033 | 0.02242358 |
| -0.1640432 | 0.02566507 | -0.2655789 | 0.00025858 | 0.13198273 | 0.07331989 |
| -0.1402422 | 0.05691118 | -0.2628951 | 0.00029997 | 0.28900508 | 6.61E-05   |
| -0.2256511 | 0.00201294 | -0.0812172 | 0.27176671 | 0.21418963 | 0.00341587 |
| -0.0876204 | 0.23563377 | -0.143082  | 0.05202289 | 0.10465911 | 0.15625908 |
| 0.02794371 | 0.70574772 | -0.24262   | 0.00087635 | 0.15714479 | 0.03266282 |
| -0.3269255 | 5.57E-06   | -0.1747204 | 0.01737508 | -0.0600825 | 0.41655868 |
| 0.04415902 | 0.55060892 | 0.02083987 | 0.77827923 | -0.2840884 | 8.90E-05   |
| -0.1072806 | 0.1460901  | -0.103667  | 0.16024334 | 0.03489915 | 0.63720793 |
| -0.0468572 | 0.52650134 | -0.0955814 | 0.19559611 | -0.1973554 | 0.00708835 |
| -0.1165477 | 0.11413781 | -0.1489358 | 0.04304073 | 0.16380015 | 0.02588774 |
| -0.0373156 | 0.61406321 | -0.2683231 | 0.0002218  | 0.23702193 | 0.00116051 |
| -0.0156064 | 0.83300922 | -0.0302497 | 0.68272647 | 0.31127416 | 1.61E-05   |
| 0.12982606 | 0.07818447 | 0.00257496 | 0.97225045 | 0.35803944 | 5.62E-07   |
| -0.09296   | 0.20819275 | -0.1344552 | 0.06804812 | 0.28902036 | 6.61E-05   |
| -0.0275248 | 0.70995898 | -0.0252839 | 0.7326352  | 0.33915489 | 2.33E-06   |
| -0.3291745 | 4.76E-06   | -0.4356221 | 5.75E-10   | 0.0485666  | 0.51151055 |
| -0.0188562 | 0.79891138 | 0.35988992 | 4.87E-07   | -0.4101752 | 6.70E-09   |
| -0.0881356 | 0.23288038 | -0.1691318 | 0.02136598 | 0.04140556 | 0.5757527  |
| -0.196311  | 0.00740343 | -0.0083929 | 0.90972564 | -0.2237037 | 0.00220626 |
| 0.62224849 | 3.26E-21   | 0.35217198 | 8.83E-07   | -0.2582716 | 0.000386   |
| -0.0488329 | 0.50919562 | -0.0783854 | 0.28888827 | -0.4687973 | 1.70E-11   |
| -0.3648176 | 3.30E-07   | -0.2536272 | 0.00049498 | 0.36176218 | 4.20E-07   |
| -0.328432  | 5.02E-06   | -0.342604  | 1.81E-06   | 0.19428208 | 0.00805134 |
| -0.2159298 | 0.00315763 | -0.1375981 | 0.06179764 | -0.1623192 | 0.02728078 |
| -0.0494627 | 0.50374103 | -0.1089803 | 0.13977005 | 0.20096665 | 0.00608887 |
| 0.44642725 | 1.90E-10   | 0.18276829 | 0.01277147 | -0.3363789 | 2.85E-06   |
| -0.3469102 | 1.31E-06   | -0.3173876 | 1.07E-05   | 0.09818027 | 0.18366346 |
| -0.2009174 | 0.00610162 | -0.2886571 | 6.76E-05   | 0.30201933 | 2.94E-05   |

|            |            |            |            |            |            |
|------------|------------|------------|------------|------------|------------|
| -0.0161369 | 0.82741985 | -0.1383696 | 0.06033751 | 0.36019544 | 4.75E-07   |
| -0.1773412 | 0.01573846 | -0.1195942 | 0.10491982 | 0.13283727 | 0.07146162 |
| -0.1745294 | 0.01749991 | -0.132499  | 0.07219254 | 0.1827035  | 0.01280377 |
| -0.2908804 | 5.90E-05   | -0.1989062 | 0.00664248 | 0.0542391  | 0.46339295 |
| -0.1198126 | 0.10428203 | -0.1878247 | 0.01046109 | 0.26710176 | 0.00023752 |
| -0.0728033 | 0.32470871 | -0.1669296 | 0.02314346 | 0.32752781 | 5.34E-06   |
| -0.321613  | 8.05E-06   | -0.3144189 | 1.31E-05   | 0.12340099 | 0.09423659 |
| 0.14476163 | 0.04929933 | -0.1151043 | 0.11872053 | -0.2158445 | 0.00316986 |
| -0.0738286 | 0.31792297 | -0.0816229 | 0.2693716  | 0.16266993 | 0.02694522 |
| -0.1070939 | 0.14679713 | -0.0776764 | 0.29328573 | 0.22185298 | 0.00240546 |
| -0.1049226 | 0.15521366 | -0.0341893 | 0.64407547 | -0.4059885 | 9.84E-09   |
| 0.11903866 | 0.10655553 | 0.06829068 | 0.35567543 | 0.12173097 | 0.09881161 |
| -0.2083847 | 0.00442105 | -0.2025372 | 0.00569496 | -0.2160393 | 0.00314198 |
| 0.0102726  | 0.88962467 | -0.0529444 | 0.47414982 | 0.19622692 | 0.00742932 |
| -0.1068294 | 0.14780353 | -0.1213928 | 0.09975908 | 0.44532838 | 2.13E-10   |
| 0.0056009  | 0.93968585 | 0.02266202 | 0.75946235 | 0.00637946 | 0.93132113 |
| -0.160438  | 0.02914246 | -0.252744  | 0.00051869 | 0.15010115 | 0.0414174  |
| 0.05024978 | 0.49696828 | -0.1201181 | 0.10339528 | 0.34294575 | 1.76E-06   |
| 0.29077566 | 5.94E-05   | 0.12923979 | 0.07955098 | -0.0013511 | 0.98543792 |
| 0.14287875 | 0.05236084 | 0.07382153 | 0.31796952 | -0.3327485 | 3.70E-06   |
| 0.09243184 | 0.21080006 | -0.0858444 | 0.24529975 | 0.17042675 | 0.02037677 |
| -0.2595791 | 0.0003596  | -0.2667438 | 0.00024232 | 0.10679014 | 0.14795334 |
| -0.0473578 | 0.5220888  | -0.0685919 | 0.35355232 | 0.22571688 | 0.00200669 |
| -0.281322  | 0.00010485 | -0.0215121 | 0.77132149 | -0.2186813 | 0.00278513 |
| -0.2770275 | 0.00013485 | -0.1466586 | 0.04636708 | -0.2688438 | 0.00021539 |
| -0.1710744 | 0.01989709 | -0.1695152 | 0.02106886 | 0.02418877 | 0.7438035  |
| 0.22511697 | 0.00206437 | 0.10327658 | 0.16183215 | 0.14891849 | 0.04306524 |
| -0.2977296 | 3.86E-05   | -0.1785537 | 0.01502791 | 0.11809111 | 0.10939177 |
| -0.2395744 | 0.00102184 | -0.1978942 | 0.0069305  | -0.1479457 | 0.04446161 |
| 0.20306924 | 0.00556678 | 0.10563454 | 0.15241481 | -0.3385402 | 2.44E-06   |
| -0.0366921 | 0.6199995  | -0.1683202 | 0.02200685 | 0.20619059 | 0.00486546 |
| -0.2308529 | 0.00156974 | 0.02111624 | 0.77541656 | -0.3032279 | 2.72E-05   |
| -0.1000538 | 0.17539925 | -0.1660861 | 0.02385732 | 0.201267   | 0.00601171 |
| 0.02727675 | 0.71245724 | -0.0803121 | 0.27716268 | 0.08702945 | 0.2388198  |
| -0.0583491 | 0.43015442 | -0.1156499 | 0.1169717  | -0.1635699 | 0.02610027 |
| 0.3171909  | 1.09E-05   | 0.21339413 | 0.00354016 | -0.2769171 | 0.00013572 |
| 0.28270549 | 9.66E-05   | 0.21155999 | 0.00384241 | -0.2194186 | 0.00269233 |
| 0.05737846 | 0.43787819 | -0.0663663 | 0.36942476 | 0.09916191 | 0.1792984  |
| 0.06281712 | 0.39562903 | -0.0703648 | 0.34121963 | 0.195029   | 0.00780718 |
| -0.1259791 | 0.08750615 | -0.261364  | 0.00032626 | 0.07128291 | 0.33494157 |
| 0.28655788 | 7.67E-05   | 0.04758366 | 0.52010371 | 0.20141963 | 0.00597284 |
| -0.1120906 | 0.12874872 | -0.2143218 | 0.00339562 | 0.26737814 | 0.00023387 |
| -0.332436  | 3.78E-06   | -0.1385169 | 0.06006195 | -0.2626429 | 0.00030416 |
| 0.1536772  | 0.03675357 | -0.0447491 | 0.54529099 | 0.11071402 | 0.13354111 |
| -0.2304844 | 0.00159793 | -0.2483802 | 0.00065197 | 0.14116624 | 0.05528067 |
| 0.25009536 | 0.00059621 | 0.1131372  | 0.12519466 | 0.24902256 | 0.00063054 |

|            |            |            |            |            |            |
|------------|------------|------------|------------|------------|------------|
| -0.1110884 | 0.13222445 | -0.1688666 | 0.02157353 | 0.21654961 | 0.00306999 |
| -0.3011702 | 3.10E-05   | -0.2491244 | 0.00062721 | 0.46379725 | 2.96E-11   |
| -0.1349741 | 0.06698194 | -0.169321  | 0.02121887 | 0.38328585 | 7.24E-08   |
| -0.1468186 | 0.04612653 | -0.1919109 | 0.00887197 | 0.26473265 | 0.00027102 |
| -0.0949911 | 0.1983829  | -0.095897  | 0.19411748 | 0.21197812 | 0.00377153 |
| -0.2111114 | 0.00391933 | -0.2189802 | 0.00274717 | -0.3108768 | 1.66E-05   |
| -0.203518  | 0.00546067 | -0.2928881 | 5.21E-05   | 0.36088707 | 4.50E-07   |
| 0.56224867 | 8.24E-17   | 0.40958808 | 7.07E-09   | -0.1962423 | 0.00742457 |
| -0.1815177 | 0.01340777 | -0.3292941 | 4.72E-06   | 0.18951096 | 0.00977716 |
| -0.1640636 | 0.02564646 | -0.2634479 | 0.00029097 | 0.31019048 | 1.73E-05   |
| 0.2401767  | 0.00099142 | -0.0314881 | 0.67048198 | -0.1025441 | 0.16484437 |
| 0.28123272 | 0.0001054  | 0.42061106 | 2.51E-09   | -0.3739114 | 1.58E-07   |
| 0.27789776 | 0.00012819 | 0.19543791 | 0.00767632 | -0.3841795 | 6.72E-08   |
| -0.1381635 | 0.06072474 | -0.134477  | 0.06800308 | 0.21473219 | 0.00333338 |
| 0.03015583 | 0.68365819 | -0.0239005 | 0.74675275 | 0.34667818 | 1.34E-06   |
| 0.01183435 | 0.87297622 | -0.078873  | 0.28588983 | 0.41847486 | 3.07E-09   |
| -0.2732616 | 0.00016758 | -0.0716185 | 0.33266534 | -0.1542555 | 0.03604271 |
| -0.1997725 | 0.00640448 | -0.2077528 | 0.00454516 | -0.2869556 | 7.49E-05   |
| 0.03028687 | 0.68235782 | 0.00231816 | 0.97501699 | -0.4013235 | 1.50E-08   |
| 0.28421412 | 8.83E-05   | 0.22832311 | 0.00177276 | 0.13624751 | 0.06442334 |
| 0.32640043 | 5.78E-06   | 0.11383842 | 0.1228562  | -0.0891656 | 0.2274443  |
| 0.49850133 | 5.16E-13   | 0.22209787 | 0.0023782  | -0.3178816 | 1.04E-05   |
| 0.34961222 | 1.07E-06   | 0.1548179  | 0.03536255 | 0.31118118 | 1.62E-05   |
| -0.068191  | 0.35637983 | -0.1822256 | 0.01304428 | 0.19645169 | 0.00736027 |
| -0.3527285 | 8.47E-07   | -0.412209  | 5.54E-09   | 0.18510303 | 0.0116542  |
| -0.0324029 | 0.66149136 | -0.174366  | 0.01760734 | 0.09496358 | 0.1985137  |
| -0.1651512 | 0.02467053 | -0.265348  | 0.00026192 | 0.09695418 | 0.18922457 |
| -0.374164  | 1.55E-07   | -0.1811477 | 0.01360124 | -0.3725932 | 1.76E-07   |
| 0.02607492 | 0.72460324 | -0.0705951 | 0.33963819 | -0.0902372 | 0.22188394 |
| -0.1194507 | 0.1053403  | -0.1486527 | 0.04344305 | 0.24823213 | 0.000657   |
| -0.0015093 | 0.98373214 | 0.01278872 | 0.86282951 | -0.1865756 | 0.01099459 |
| 0.06317372 | 0.39294692 | -0.0402363 | 0.5865902  | 0.10861509 | 0.14111023 |
| -0.291218  | 5.78E-05   | -0.2974517 | 3.93E-05   | 0.09881957 | 0.18081191 |
| -0.1119197 | 0.12933652 | -0.2553667 | 0.0004512  | 0.07736846 | 0.29520928 |
| -0.1069541 | 0.14732825 | -0.1444833 | 0.04974228 | 0.31583574 | 1.19E-05   |
| -0.1084226 | 0.14182051 | -0.2320115 | 0.00148405 | 0.29563505 | 4.40E-05   |
| -0.1767045 | 0.01612315 | -0.0352906 | 0.63343376 | -0.0944631 | 0.20090035 |
| -0.1506919 | 0.04061432 | -0.0336663 | 0.64915463 | -0.1227453 | 0.09601242 |
| -0.2093711 | 0.00423342 | -0.2394732 | 0.00102704 | 0.14914342 | 0.04274768 |
| -0.1290378 | 0.08002632 | -0.1410253 | 0.05552678 | -0.360476  | 4.65E-07   |
| -0.1454484 | 0.0482204  | -0.1048609 | 0.15545804 | 0.17191867 | 0.01928648 |
| 0.34770063 | 1.24E-06   | 0.23958303 | 0.0010214  | 0.17718288 | 0.01583334 |
| 0.04290879 | 0.56195904 | -0.0903252 | 0.22143198 | 0.22223044 | 0.00236356 |
| 0.32308791 | 7.27E-06   | 0.261724   | 0.00031989 | -0.1692877 | 0.02124471 |
| -0.1857926 | 0.01134111 | -0.2677565 | 0.00022896 | 0.14904582 | 0.04288523 |
| -0.1301005 | 0.07755133 | -0.1740896 | 0.01779041 | 0.20711815 | 0.00467292 |

|            |            |            |            |            |            |
|------------|------------|------------|------------|------------|------------|
| 0.33971565 | 2.24E-06   | 0.30198438 | 2.95E-05   | -0.4278377 | 1.24E-09   |
| -0.2238287 | 0.00219336 | -0.2359081 | 0.00122626 | 0.23124731 | 0.00154008 |
| -0.0927654 | 0.20915107 | 0.01009745 | 0.89149502 | -0.2115149 | 0.00385013 |
| -0.1302444 | 0.0772211  | -0.1487634 | 0.04328532 | -0.1675174 | 0.022657   |
| -0.0779318 | 0.29169631 | -0.1034987 | 0.16092686 | -0.1958352 | 0.00755106 |
| -0.3330806 | 3.61E-06   | -0.3117234 | 1.57E-05   | -0.1127282 | 0.12657425 |
| -0.1259653 | 0.08754129 | -0.1963366 | 0.00739554 | 0.09590013 | 0.19410294 |
| -0.0213099 | 0.77341276 | 0.04136814 | 0.57609805 | 0.16803772 | 0.02223374 |
| 0.14979004 | 0.04184566 | 0.02558353 | 0.72958944 | 0.3748337  | 1.47E-07   |
| -0.1593177 | 0.03030184 | -0.1652318 | 0.02459944 | -0.2156269 | 0.00320127 |
| -0.2056317 | 0.00498489 | -0.2455674 | 0.00075392 | 0.03316294 | 0.65405881 |
| -0.2697332 | 0.00020485 | -0.1772817 | 0.01577402 | -0.0038363 | 0.95866748 |
| -0.3452361 | 1.49E-06   | -0.3374444 | 2.64E-06   | 0.13038511 | 0.07689914 |
| -0.0561319 | 0.44791258 | -0.1190895 | 0.106405   | 0.15864265 | 0.03101923 |
| 0.12124481 | 0.10017602 | 0.01530469 | 0.83619146 | 0.23630104 | 0.00120269 |
| 0.0799905  | 0.27909724 | -0.1934701 | 0.00832443 | 0.2355833  | 0.00124607 |
| -0.1974592 | 0.00705769 | -0.1203744 | 0.10265589 | -0.2331846 | 0.00140166 |
| -0.289479  | 6.43E-05   | -0.1570606 | 0.03275731 | -0.2583258 | 0.00038487 |
| 0.16111713 | 0.02845825 | 0.11014179 | 0.1355731  | -0.0325076 | 0.66046601 |
| -0.1370157 | 0.06291882 | -0.2264175 | 0.00194119 | 0.00917634 | 0.90134033 |
| -0.1959136 | 0.00752654 | -0.2297966 | 0.00165178 | 0.15290539 | 0.03772072 |
| -0.2252466 | 0.00205178 | -0.2527274 | 0.00051914 | 0.26107669 | 0.00033142 |
| -0.0685056 | 0.35415975 | -0.02516   | 0.73389607 | 0.07923987 | 0.28364789 |
| -0.103118  | 0.16248078 | -0.1501527 | 0.04134679 | 0.09739905 | 0.18719274 |
| -0.0155938 | 0.83314129 | -0.0296444 | 0.68874224 | 0.32880494 | 4.89E-06   |
| 0.12848923 | 0.08132844 | 0.01897845 | 0.79763553 | 0.21793689 | 0.00288177 |
| -0.0547737 | 0.45899088 | -0.0912802 | 0.21656604 | 0.22924447 | 0.0016962  |
| -0.275365  | 0.00014849 | -0.1557238 | 0.03428981 | -0.3269837 | 5.55E-06   |
| -0.3117454 | 1.56E-05   | -0.1874154 | 0.01063332 | -0.4808224 | 4.30E-12   |
| -0.1303661 | 0.07694258 | -0.214962  | 0.00329898 | 0.17588865 | 0.01662808 |
| -0.0645914 | 0.38239244 | -0.2094269 | 0.00422303 | -0.3354304 | 3.05E-06   |
| 0.02688712 | 0.71638724 | -0.0579523 | 0.4333023  | 0.22193928 | 0.00239582 |
| -0.035681  | 0.62967899 | -0.0486609 | 0.51069    | 0.4073547  | 8.68E-09   |
| 0.01349557 | 0.85532865 | -0.0046499 | 0.9499122  | 0.18811936 | 0.01033861 |
| -0.2936326 | 4.98E-05   | -0.2192337 | 0.00271534 | -0.2201241 | 0.00260616 |
| -0.2640505 | 0.00028145 | -0.1364308 | 0.06406166 | -0.3405681 | 2.10E-06   |
| -0.186601  | 0.01098349 | -0.0128698 | 0.86196896 | 0.0979527  | 0.18468646 |
| -0.1305666 | 0.07648547 | -0.0877807 | 0.23477438 | -0.3065076 | 2.20E-05   |
| -0.2469079 | 0.00070363 | -0.2163997 | 0.00309098 | -0.1660766 | 0.02386548 |
| -0.100958  | 0.17151034 | -0.1207213 | 0.10166194 | 0.02845704 | 0.70059893 |
| -0.2265871 | 0.00192563 | -0.1050822 | 0.15458295 | -0.2556279 | 0.00044495 |
| 0.14302436 | 0.05211859 | 0.01014264 | 0.89101235 | 0.31188728 | 1.55E-05   |
| 0.60395572 | 8.99E-20   | 0.33573637 | 2.98E-06   | -0.1014972 | 0.16922244 |
| -0.1643805 | 0.02535873 | -0.2998355 | 3.38E-05   | 0.34165765 | 1.94E-06   |
| -0.2309053 | 0.00156577 | -0.086869  | 0.23969027 | 0.35496778 | 7.13E-07   |
| -0.087388  | 0.23688288 | 0.03261448 | 0.65941899 | -0.0958447 | 0.1943619  |



|            |            |            |            |            |            |
|------------|------------|------------|------------|------------|------------|
| 0.37723831 | 1.20E-07   | 0.20407603 | 0.00533127 | 0.11822729 | 0.10898057 |
| 0.158326   | 0.03136069 | 0.07936787 | 0.28286838 | -0.3408688 | 2.06E-06   |
| 0.1203993  | 0.1025843  | 0.02998299 | 0.68537481 | 0.4044263  | 1.13E-08   |
| 0.26328934 | 0.00029352 | 0.13343339 | 0.07018811 | 0.25965798 | 0.00035806 |
| -0.0081193 | 0.91265702 | -0.0485152 | 0.511958   | 0.17723067 | 0.01580464 |
| 0.00994607 | 0.89311189 | -0.0220729 | 0.76553077 | -0.1151274 | 0.11864618 |
| 0.59865798 | 2.26E-19   | 0.35900988 | 5.21E-07   | -0.1538966 | 0.03648249 |
| 0.18647947 | 0.01103661 | -0.0669887 | 0.36494279 | 0.26391694 | 0.00028353 |
| -0.1068421 | 0.14775496 | -0.0066458 | 0.92846088 | 0.12534403 | 0.08912735 |
| -0.4119705 | 5.67E-09   | -0.4034456 | 1.24E-08   | 0.40846348 | 7.84E-09   |
| -0.0134805 | 0.85548844 | 0.00208172 | 0.97756437 | -0.2940826 | 4.84E-05   |
| -0.0362291 | 0.62442394 | -0.0031978 | 0.96554197 | 0.06564928 | 0.37463064 |
| 0.01167284 | 0.87469548 | -0.0951335 | 0.19770793 | -0.1226374 | 0.09630705 |
| 0.27202893 | 0.00017982 | 0.08670315 | 0.24059194 | 0.29734537 | 3.95E-05   |
| -0.1297704 | 0.07831341 | -0.1195416 | 0.10507393 | 0.24747045 | 0.00068346 |
| -0.0919581 | 0.21315863 | -0.1084437 | 0.14174244 | 0.30275167 | 2.81E-05   |
| 0.27037818 | 0.00019751 | 0.16816167 | 0.02213392 | -0.2677283 | 0.00022933 |
| 0.02842908 | 0.70087907 | -0.0382507 | 0.60520596 | 0.17301274 | 0.01851941 |
| -0.1474533 | 0.04518262 | -0.1635173 | 0.026149   | 0.12737338 | 0.08402995 |
| -0.0164595 | 0.82402524 | -0.0358758 | 0.62780958 | -0.1316332 | 0.07409127 |
| -0.08148   | 0.27021351 | 0.02401818 | 0.74554806 | -0.3048374 | 2.45E-05   |
| -0.2143201 | 0.00339587 | -0.2819066 | 0.00010128 | 0.33579038 | 2.97E-06   |
| -0.2264023 | 0.00194259 | -0.2656807 | 0.00025712 | -0.195983  | 0.00750492 |
| -0.1555063 | 0.03454481 | -0.1812482 | 0.01354845 | 0.44355921 | 2.56E-10   |
| -0.1465874 | 0.04647435 | -0.2110021 | 0.00393885 | -0.0864864 | 0.24177415 |
| 0.18760608 | 0.01055277 | -0.1020949 | 0.16671237 | 0.2354879  | 0.00125194 |
| -0.2561984 | 0.00043156 | -0.2212342 | 0.00247562 | -0.1870576 | 0.01078594 |
| -0.0394485 | 0.59394476 | -0.0769751 | 0.29767884 | 0.20060816 | 0.00618213 |
| 0.02728127 | 0.71241176 | 0.0394692  | 0.59375086 | -0.2489873 | 0.0006317  |
| 0.17566863 | 0.01676659 | 0.47689181 | 6.77E-12   | 0.18146116 | 0.01343717 |
| 0.17672719 | 0.0161093  | 0.05696149 | 0.44122021 | 0.4362568  | 5.39E-10   |
| -0.0359839 | 0.62677289 | -0.0264455 | 0.72085093 | 0.25929625 | 0.00036516 |
| 0.19985567 | 0.00638204 | 0.07507344 | 0.3098093  | 0.27412462 | 0.00015949 |
| -0.1495936 | 0.04211794 | -0.0748933 | 0.31097518 | -0.1973753 | 0.00708244 |
| -0.0835083 | 0.25842875 | -0.1359127 | 0.06508828 | -0.2706834 | 0.00019412 |
| -0.2966112 | 4.14E-05   | -0.1947349 | 0.00790254 | -0.3209367 | 8.43E-06   |
| -0.3190822 | 9.56E-06   | -0.1885094 | 0.01017845 | 0.09886075 | 0.18062933 |
| -0.1576764 | 0.03207124 | -0.1660189 | 0.02391499 | 0.16541769 | 0.02443632 |
| 0.00617445 | 0.93352299 | -0.0916237 | 0.2148345  | 0.14398345 | 0.05054607 |
| 0.18505089 | 0.01167818 | 0.24101164 | 0.00095063 | -0.2186798 | 0.00278533 |
| -0.0124344 | 0.86659416 | -0.0634529 | 0.39085461 | 0.17092527 | 0.02000666 |
| 0.04987321 | 0.50020266 | 0.21098907 | 0.00394113 | 0.10299025 | 0.16300475 |
| -0.3094249 | 1.82E-05   | -0.2196721 | 0.00266108 | -0.1958964 | 0.00753191 |
| 0.10792002 | 0.14368756 | -0.0612279 | 0.40771453 | 0.06491614 | 0.37999971 |
| -0.1614062 | 0.02817117 | -0.1185657 | 0.10796395 | 0.15330318 | 0.0372196  |
| 0.21782069 | 0.00289712 | -0.0036014 | 0.96119648 | 0.311758   | 1.56E-05   |

|            |            |            |            |            |            |
|------------|------------|------------|------------|------------|------------|
| -0.0932863 | 0.20659408 | 0.04227581 | 0.56774796 | -0.2639392 | 0.00028318 |
| -0.22655   | 0.00192902 | -0.2357593 | 0.0012353  | 0.17309968 | 0.01845961 |
| -0.0603067 | 0.41481917 | -0.0906327 | 0.21985663 | 0.15995379 | 0.02963883 |
| -0.0236466 | 0.74935262 | -0.098248  | 0.18335972 | -0.2034852 | 0.00546837 |
| -0.1478985 | 0.04453024 | -0.1010046 | 0.17131172 | -0.2109673 | 0.00394494 |
| 0.07264053 | 0.32579441 | 0.2075137  | 0.00459291 | -0.4373308 | 4.84E-10   |
| -0.1155089 | 0.11742167 | -0.0857688 | 0.24571724 | 0.12480756 | 0.09051536 |
| -0.2089052 | 0.00432114 | -0.2769882 | 0.00013516 | 0.30577762 | 2.31E-05   |
| -0.200808  | 0.00612998 | -0.2590182 | 0.00037071 | 0.14746898 | 0.04515951 |
| 0.02291208 | 0.75689077 | 0.04474733 | 0.54530704 | 0.1597412  | 0.02985904 |
| 0.16908719 | 0.02140074 | 0.08847081 | 0.23110131 | -0.3522318 | 8.79E-07   |
| 0.13051543 | 0.07660198 | 0.09593602 | 0.19393533 | -0.2708214 | 0.0001926  |
| 0.16656337 | 0.02345111 | -0.0313963 | 0.67138616 | -0.1034236 | 0.16123235 |
| -0.1668629 | 0.02319926 | -0.0477568 | 0.51858479 | 0.28510861 | 8.37E-05   |
| 0.04996714 | 0.49939486 | -0.0313123 | 0.67221497 | -0.0093903 | 0.89905244 |
| -0.2118717 | 0.00378945 | -0.1374516 | 0.06207802 | 0.20423729 | 0.00529439 |
| 0.10230518 | 0.16583604 | 0.21865339 | 0.0027887  | -0.3316675 | 3.99E-06   |
| 0.29580365 | 4.35E-05   | 0.12040974 | 0.10255431 | 0.32283336 | 7.40E-06   |
| 0.05914527 | 0.42387856 | -0.1216846 | 0.09894113 | -0.191752  | 0.0089295  |
| 0.42393668 | 1.82E-09   | 0.20669664 | 0.00475955 | -0.209846  | 0.00414568 |
| 0.20907228 | 0.0042895  | 0.02526709 | 0.73280638 | 0.1761849  | 0.01644316 |
| -0.3353006 | 3.08E-06   | -0.3893074 | 4.33E-08   | 0.2452342  | 0.00076693 |
| -0.0758182 | 0.30502031 | 0.2038112  | 0.00539234 | -0.3430064 | 1.76E-06   |
| -0.0219149 | 0.76716165 | -0.084786  | 0.25118934 | -0.3694399 | 2.28E-07   |
| -0.3367598 | 2.77E-06   | -0.2105691 | 0.0040152  | -0.2415642 | 0.00092448 |
| -0.2419164 | 0.00090816 | -0.2422876 | 0.00089125 | -0.0033694 | 0.96369386 |
| -0.1218497 | 0.09848078 | -0.216986  | 0.00300961 | 0.12830915 | 0.08175965 |
| -0.3871516 | 5.21E-08   | -0.3937455 | 2.94E-08   | 0.02080524 | 0.77863812 |
| 0.04461488 | 0.54649849 | -0.0616227 | 0.40469212 | 0.11662289 | 0.11390301 |
| -0.2007937 | 0.00613369 | -0.2815007 | 0.00010374 | -0.3449897 | 1.52E-06   |
| 0.12096578 | 0.10096579 | 0.03167058 | 0.66868446 | 0.1248242  | 0.09047205 |
| -0.2784147 | 0.00012438 | -0.3023527 | 2.88E-05   | -0.0404341 | 0.58475042 |
| 0.02748286 | 0.71038145 | -0.1433911 | 0.05151252 | 0.24766297 | 0.00067668 |
| -0.2539532 | 0.00048649 | -0.1587111 | 0.03094584 | -0.2888628 | 6.67E-05   |
| -0.4165527 | 3.69E-09   | -0.3426543 | 1.80E-06   | 0.24231024 | 0.00089023 |
| -0.2681784 | 0.00022361 | -0.3060454 | 2.27E-05   | 0.2135985  | 0.00350785 |
| -0.0704941 | 0.34033077 | 0.17278839 | 0.01867451 | -0.3527099 | 8.48E-07   |
| 0.24504862 | 0.00077426 | 0.17124222 | 0.01977439 | -0.3061766 | 2.25E-05   |
| 0.11035177 | 0.13482471 | -0.0016631 | 0.98207497 | -0.1888259 | 0.0100501  |
| 0.22090939 | 0.00251319 | 0.0910936  | 0.21751057 | 0.35948026 | 5.03E-07   |
| -0.0205323 | 0.78146863 | 0.00020051 | 0.99783871 | 0.05690965 | 0.44163668 |
| -0.3104745 | 1.70E-05   | -0.1888955 | 0.01002204 | -0.4782572 | 5.78E-12   |
| -0.1544859 | 0.03576271 | -0.232933  | 0.00141897 | 0.16296507 | 0.02666557 |
| -0.1114059 | 0.13111555 | -0.1726356 | 0.01878077 | 0.12398688 | 0.09267203 |
| -0.0393578 | 0.59479392 | 0.05598903 | 0.44907048 | -0.1183397 | 0.10864206 |
| -0.045724  | 0.53656128 | -0.0001107 | 0.99880708 | 0.19924299 | 0.00654904 |

|            |            |            |            |            |            |
|------------|------------|------------|------------|------------|------------|
| -0.3189585 | 9.64E-06   | -0.2995394 | 3.44E-05   | 0.14142552 | 0.05483013 |
| -0.2442958 | 0.00080467 | -0.2955249 | 4.43E-05   | 0.13924159 | 0.05872151 |
| 0.0747029  | 0.31221015 | -0.0704802 | 0.34042616 | 0.20062357 | 0.00617809 |
| -0.0701715 | 0.34255072 | -0.077664  | 0.29336275 | 0.20907353 | 0.00428926 |
| 0.09832902 | 0.18299704 | -0.0197943 | 0.78913565 | -0.1457479 | 0.04775602 |
| 0.04753409 | 0.52053902 | 0.00947365 | 0.89816077 | -0.3282144 | 5.09E-06   |
| -0.3146333 | 1.29E-05   | -0.3253497 | 6.22E-06   | 0.05064451 | 0.49358979 |
| -0.1510849 | 0.04008736 | -0.1685801 | 0.02179978 | 0.26443817 | 0.00027547 |
| -0.1825986 | 0.01285623 | -0.1607134 | 0.02886331 | -0.2170333 | 0.00300314 |
| -0.0259176 | 0.72619848 | -0.0498204 | 0.50065709 | -0.034775  | 0.63840654 |
| -0.1936314 | 0.00826954 | -0.0590141 | 0.42490879 | -0.2762728 | 0.00014089 |
| -0.1794937 | 0.01449649 | -0.1649717 | 0.0248293  | -0.170647  | 0.02021256 |
| -0.1134003 | 0.12431322 | -0.1555574 | 0.03448475 | 0.14879092 | 0.04324623 |
| 0.01537872 | 0.83541034 | -0.0669101 | 0.36550649 | -0.2615661 | 0.00032267 |
| -0.0485836 | 0.51136233 | -0.1417267 | 0.05431067 | 0.14887978 | 0.0431201  |
| -0.1958804 | 0.00753692 | -0.2057951 | 0.00494971 | 0.21120196 | 0.00390405 |
| -0.1202643 | 0.10297309 | -0.165975  | 0.02395271 | -0.3330183 | 3.63E-06   |
| -0.3231767 | 7.23E-06   | -0.2221284 | 0.00237482 | 0.16620262 | 0.02375758 |
| -0.087457  | 0.23651143 | -0.1559554 | 0.03402012 | 0.09361726 | 0.20498104 |
| 0.13593767 | 0.06503842 | -0.0198765 | 0.78828082 | -0.0740891 | 0.31621377 |
| -0.216226  | 0.00311547 | -0.1648069 | 0.02497595 | 0.19946435 | 0.00648826 |
| 0.17131055 | 0.01972463 | 0.3182208  | 1.01E-05   | 0.06632127 | 0.36975053 |
| -0.4175486 | 3.36E-09   | -0.2882338 | 6.93E-05   | 0.35977162 | 4.91E-07   |
| -0.2410564 | 0.00094848 | -0.2943716 | 4.76E-05   | 0.21895016 | 0.00275096 |
| -0.1788164 | 0.01487773 | -0.04327   | 0.5586685  | 0.12977256 | 0.07830838 |
| 0.07320267 | 0.32205451 | 0.16290488 | 0.0267224  | -0.3544136 | 7.44E-07   |
| -0.3112271 | 1.62E-05   | -0.2616781 | 0.0003207  | 0.06167626 | 0.40428308 |
| -0.0442264 | 0.55000013 | -0.0720812 | 0.32954309 | 0.19989638 | 0.00637108 |
| 0.41827982 | 3.13E-09   | 0.16502976 | 0.02477788 | -0.0002935 | 0.99683649 |
| -0.0122479 | 0.86857687 | -0.1001389 | 0.17503034 | -0.3225553 | 7.54E-06   |
| 0.34166637 | 1.94E-06   | 0.23564292 | 0.00124241 | -0.1744161 | 0.01757438 |
| -0.0599675 | 0.41745285 | -0.254725  | 0.00046692 | 0.20529206 | 0.00505874 |
| 0.09254544 | 0.21023737 | -0.0284119 | 0.70105153 | -0.2377984 | 0.00111661 |
| -0.0610083 | 0.40940173 | 0.07852228 | 0.28804461 | -0.2749995 | 0.00015165 |
| -0.0557443 | 0.45105834 | -0.1901291 | 0.00953652 | 0.27929535 | 0.00011813 |
| -0.4033004 | 1.26E-08   | -0.1505893 | 0.04075283 | -0.3364154 | 2.84E-06   |
| -0.0653536 | 0.3767903  | -0.1384222 | 0.06023897 | 0.2548146  | 0.00046469 |
| -0.1074124 | 0.14559216 | -0.2161838 | 0.00312144 | 0.18357739 | 0.01237407 |
| 0.15487892 | 0.03528942 | -0.061531  | 0.40539275 | 0.11459698 | 0.12036478 |
| -0.0453415 | 0.5399775  | -0.0140092 | 0.84988673 | -0.20255   | 0.00569185 |
| 0.30280323 | 2.80E-05   | 0.09202409 | 0.21282877 | -0.2111099 | 0.00392005 |
| -0.2747361 | 0.00015397 | -0.1932054 | 0.0084152  | -0.5398809 | 2.19E-15   |
| -0.3146446 | 1.29E-05   | -0.2792542 | 0.00011841 | 0.21446336 | 0.00337403 |
| 0.23314625 | 0.00140429 | 0.07426677 | 0.31505147 | -0.1598807 | 0.02971438 |
| -0.160191  | 0.02939473 | -0.1308343 | 0.07587872 | -0.2082654 | 0.00444425 |
| -0.1275137 | 0.08368634 | 0.00078676 | 0.9915198  | -0.2897468 | 6.32E-05   |

|            |            |            |            |            |            |
|------------|------------|------------|------------|------------|------------|
| -0.0078927 | 0.91508586 | -0.1046163 | 0.15642962 | 0.13050364 | 0.07662884 |
| 0.29446869 | 4.73E-05   | 0.15110599 | 0.04005924 | -0.2947663 | 4.64E-05   |
| 0.33597179 | 2.93E-06   | 0.1573847  | 0.0323947  | 0.15921656 | 0.03040841 |
| -0.2964052 | 4.19E-05   | -0.3143027 | 1.32E-05   | -0.2802854 | 0.00011145 |
| 0.13611587 | 0.06468407 | 0.08162865 | 0.26933775 | -0.0406325 | 0.58290738 |
| 0.25071169 | 0.00057727 | 0.07496939 | 0.31048227 | 0.13710424 | 0.06274733 |
| 0.06830906 | 0.35554566 | -0.0615354 | 0.40535917 | -0.1644098 | 0.02533222 |
| -0.3240073 | 6.82E-06   | -0.195823  | 0.00755489 | -0.2269983 | 0.00188837 |
| 0.042362   | 0.56695807 | 0.20533579 | 0.00504918 | -0.2486133 | 0.00064412 |
| -0.1835551 | 0.01238487 | -0.1543673 | 0.03590657 | -0.3331414 | 3.59E-06   |
| 0.35282408 | 8.40E-07   | 0.02164783 | 0.769919   | 0.22613463 | 0.0019674  |
| 0.0854284  | 0.24760292 | -0.0408311 | 0.58106511 | 0.26404019 | 0.00028161 |
| 0.15548622 | 0.03456847 | 0.44174281 | 3.09E-10   | -0.3163644 | 1.15E-05   |
| -0.1314104 | 0.0745863  | -0.1567276 | 0.03313355 | 0.09802021 | 0.18438253 |
| -0.2136408 | 0.00350119 | -0.1687745 | 0.02164608 | 0.00762772 | 0.91792602 |
| 0.16971725 | 0.02091371 | 0.05240413 | 0.47867885 | 0.25831386 | 0.00038512 |
| 0.02786004 | 0.70658818 | -0.0327216 | 0.65837073 | 0.35924876 | 5.12E-07   |
| -0.0870272 | 0.23883221 | -0.0500502 | 0.4986814  | -0.3114706 | 1.59E-05   |
| -0.1402538 | 0.05689051 | 0.00100515 | 0.989166   | -0.104693  | 0.15612423 |
| -0.389522  | 4.25E-08   | -0.3080333 | 1.99E-05   | -0.0559289 | 0.44955881 |
| -0.0242801 | 0.74287011 | -0.1002358 | 0.17461129 | -0.1889341 | 0.01000655 |
| -0.1025663 | 0.16475277 | -0.2312066 | 0.00154311 | 0.16117171 | 0.02840386 |
| -0.3643938 | 3.41E-07   | -0.300149  | 3.31E-05   | 0.03667119 | 0.62019913 |
| -0.1154902 | 0.11748158 | -0.1696071 | 0.02099815 | 0.14835894 | 0.04386384 |
| -0.0377927 | 0.60953693 | -0.0888013 | 0.22935664 | 0.34077339 | 2.07E-06   |
| -0.2779176 | 0.00012804 | -0.2521648 | 0.0005348  | 0.09968905 | 0.17698613 |
| -0.2571386 | 0.00041031 | -0.225165  | 0.0020597  | 0.21214316 | 0.00374388 |
| -0.0990972 | 0.17958397 | 0.11376578 | 0.12309685 | -0.3942107 | 2.82E-08   |
| 0.336584   | 2.81E-06   | 0.15787549 | 0.03185202 | -0.1631765 | 0.02646676 |
| -0.0613512 | 0.40676932 | -0.0921282 | 0.21230962 | -0.2252309 | 0.0020533  |
| -0.3230947 | 7.27E-06   | -0.3540876 | 7.63E-07   | 0.12836753 | 0.08161966 |
| 0.054512   | 0.46114294 | 0.0476263  | 0.51972946 | -0.2294211 | 0.00168187 |
| -0.198628  | 0.00672059 | -0.0515372 | 0.48599485 | -0.2374934 | 0.00113367 |
| 0.13137299 | 0.07466965 | -0.0292401 | 0.6927715  | 0.15804411 | 0.03166736 |
| 0.33245299 | 3.78E-06   | 0.33995104 | 2.20E-06   | -0.4692835 | 1.61E-11   |
| -0.2192362 | 0.00271502 | -0.2710503 | 0.00019012 | 0.1188121  | 0.10722836 |
| -0.1848407 | 0.01177528 | -0.161987  | 0.027602   | 0.3198722  | 9.06E-06   |
| 0.0895588  | 0.22539265 | 0.0662655  | 0.37015408 | 0.19003788 | 0.0095717  |
| 0.2174164  | 0.00295113 | 0.06646621 | 0.36870311 | -0.2873807 | 7.30E-05   |
| 0.25302351 | 0.00051107 | 0.15530557 | 0.03478161 | -0.2462271 | 0.00072877 |
| -0.056857  | 0.44205956 | -0.0320758 | 0.66470012 | -0.1174917 | 0.11121633 |
| 0.07488139 | 0.31105212 | 0.05063981 | 0.49362993 | -0.0950951 | 0.19789015 |
| -0.0550327 | 0.45686667 | -0.0767775 | 0.29892415 | 0.0895389  | 0.22549619 |
| -0.0630545 | 0.3938427  | -0.0940274 | 0.20299484 | -0.3614806 | 4.30E-07   |
| -0.126742  | 0.08559026 | 0.02596939 | 0.72567317 | -0.0761078 | 0.30317145 |
| -0.253955  | 0.00048645 | -0.2612626 | 0.00032807 | 0.2138585  | 0.00346712 |

|            |            |            |            |            |            |
|------------|------------|------------|------------|------------|------------|
| -0.2098214 | 0.00415019 | -0.1580676 | 0.03164168 | -0.2066228 | 0.00477489 |
| -0.1823515 | 0.01298053 | -0.1208218 | 0.10137534 | -0.2904788 | 6.05E-05   |
| -0.2647014 | 0.00027149 | -0.2822394 | 9.93E-05   | 0.17905945 | 0.01473991 |
| 0.28859116 | 6.78E-05   | 0.20248903 | 0.00570669 | -0.0895166 | 0.22561201 |
| -0.1744488 | 0.01755285 | 0.03395447 | 0.64635422 | -0.3077118 | 2.04E-05   |
| -0.1300312 | 0.07771072 | -0.0763102 | 0.3018839  | -0.2581097 | 0.00038939 |
| -0.3158553 | 1.19E-05   | -0.3330464 | 3.62E-06   | 0.31888742 | 9.69E-06   |
| -0.0952022 | 0.19738317 | -0.3099373 | 1.76E-05   | 0.47292508 | 1.07E-11   |
| -0.2660069 | 0.00025249 | -0.0029414 | 0.96830369 | -0.3725082 | 1.78E-07   |
| 0.46612068 | 2.29E-11   | 0.25372514 | 0.00049242 | -0.0217005 | 0.76937504 |
| 0.34058081 | 2.10E-06   | 0.2923394  | 5.39E-05   | -0.044623  | 0.54642522 |
| 0.03136037 | 0.6717406  | 0.02885977 | 0.69656913 | -0.0780425 | 0.29100967 |
| 0.0089269  | 0.90400915 | -0.0449675 | 0.54332911 | 0.12385751 | 0.09301572 |
| 0.00662224 | 0.92871422 | -0.0163525 | 0.82515104 | 0.02617774 | 0.72356139 |
| 0.09523117 | 0.19724611 | 0.14375708 | 0.05091363 | -0.2382078 | 0.00109407 |
| 0.17614507 | 0.01646792 | 0.07169462 | 0.33215045 | -0.0067248 | 0.92761344 |
| 0.01109312 | 0.88087138 | 0.08012516 | 0.27828608 | -0.0756599 | 0.30603438 |
| -0.3224049 | 7.62E-06   | -0.3060137 | 2.27E-05   | 0.4082306  | 8.01E-09   |
| -0.0126309 | 0.86450582 | -0.0690717 | 0.35018786 | -0.1834863 | 0.01241827 |
| 0.08116218 | 0.27209283 | -0.0991191 | 0.17948729 | 0.10519181 | 0.15415069 |
| -0.2240324 | 0.00217249 | -0.2326269 | 0.00144029 | 0.54730661 | 7.57E-16   |
| 0.19471581 | 0.00790875 | 0.07130902 | 0.33476415 | -0.0458696 | 0.53526278 |
| 0.37636333 | 1.29E-07   | 0.17593682 | 0.01659789 | -0.1384405 | 0.06020468 |
| -0.0155746 | 0.83334445 | -0.0814981 | 0.27010715 | 0.45389382 | 8.65E-11   |
| -0.0082861 | 0.91087004 | -0.0121374 | 0.86975156 | 0.04343529 | 0.55716557 |
| -0.2882849 | 6.91E-05   | -0.2589851 | 0.00037138 | 0.38841708 | 4.67E-08   |
| 0.22844535 | 0.00176242 | 0.12368959 | 0.09346332 | -0.0347068 | 0.63906621 |
| -0.0282006 | 0.70316978 | -0.2251062 | 0.00206542 | 0.29883597 | 3.60E-05   |
| -0.0639248 | 0.38733362 | -0.1860718 | 0.01121647 | 0.30401158 | 2.59E-05   |
| -0.1434502 | 0.05141541 | -0.1026685 | 0.16432986 | 0.52730681 | 1.25E-14   |
| 0.13823118 | 0.06059734 | -0.0498282 | 0.50059024 | 0.22738836 | 0.00185364 |
| 0.07035661 | 0.34127597 | 0.17106273 | 0.01990564 | -0.1995875 | 0.00645466 |
| -0.2463439 | 0.0007244  | -0.2860163 | 7.93E-05   | 0.07229876 | 0.32808185 |
| -0.1417548 | 0.05426232 | -0.2143712 | 0.00338807 | 0.17576741 | 0.01670428 |
| -0.1391528 | 0.0588844  | -0.088184  | 0.23262272 | -0.1301402 | 0.07746021 |
| -0.1456124 | 0.04796565 | -0.1193388 | 0.1056693  | 0.26693956 | 0.00023968 |
| 0.06408033 | 0.3861775  | -0.0114601 | 0.87696065 | -0.4366289 | 5.19E-10   |
| -0.1904653 | 0.00940788 | -0.2825181 | 9.77E-05   | 0.14185968 | 0.05408253 |
| 0.18720057 | 0.01072473 | 0.15237439 | 0.03839853 | -0.3327657 | 3.69E-06   |
| 0.11289822 | 0.12599943 | 0.053068   | 0.4731173  | 0.02070837 | 0.77964234 |
| -0.1633982 | 0.02625965 | -0.0736805 | 0.3188974  | -0.1083193 | 0.14220275 |
| -0.113995  | 0.12233854 | 0.00919103 | 0.90118323 | -0.2679368 | 0.00022666 |
| -0.4179563 | 3.23E-09   | -0.2774375 | 0.00013167 | 0.44328333 | 2.63E-10   |
| 0.08280389 | 0.26248091 | 0.07971036 | 0.28078978 | -0.1534103 | 0.03708564 |
| -0.2939497 | 4.88E-05   | -0.256781  | 0.00041828 | 0.00354573 | 0.96179558 |
| 0.36227429 | 4.04E-07   | 0.06413835 | 0.38574669 | -0.0346358 | 0.639752   |

|            |            |            |            |            |            |
|------------|------------|------------|------------|------------|------------|
| -0.0358349 | 0.62820173 | 0.02861286 | 0.69903871 | -0.1407484 | 0.05601312 |
| -0.2100356 | 0.00411109 | -0.2960181 | 4.29E-05   | 0.15556896 | 0.03447122 |
| 0.03482516 | 0.6379223  | -0.0622206 | 0.40013983 | 0.29508688 | 4.55E-05   |
| -0.2117797 | 0.00380503 | -0.310272  | 1.72E-05   | 0.35518611 | 7.01E-07   |
| -0.1692824 | 0.02124878 | -0.1712182 | 0.01979193 | 0.34206332 | 1.88E-06   |
| -0.0924462 | 0.21072905 | -0.1540474 | 0.03629719 | 0.07134714 | 0.33450515 |
| 0.38582133 | 5.84E-08   | 0.11913502 | 0.10627039 | -0.2876128 | 7.20E-05   |
| 6.58E-05   | 0.99929064 | -0.0643455 | 0.38421078 | 0.25882012 | 0.00037471 |
| -0.1768051 | 0.01606183 | -0.2204444 | 0.00256787 | 0.27150092 | 0.00018531 |
| -0.0226039 | 0.76006005 | -0.0319064 | 0.6663649  | 0.10075581 | 0.17237447 |
| 0.04486193 | 0.54427714 | 0.15885833 | 0.03078847 | 0.00977074 | 0.89498527 |
| 0.02526781 | 0.73279906 | -0.0002357 | 0.99745908 | -0.5303824 | 8.19E-15   |
| 0.07066836 | 0.33913568 | 0.3249897  | 6.38E-06   | -0.2569459 | 0.00041459 |
| 0.13201494 | 0.07324915 | 0.03518612 | 0.63444023 | 0.31537659 | 1.23E-05   |
| -0.0614299 | 0.40616615 | -0.1255962 | 0.08848079 | -0.4250211 | 1.64E-09   |
| -0.1983468 | 0.00680036 | -0.2222084 | 0.00236598 | 0.21768955 | 0.00291454 |
| -0.14443   | 0.04982751 | 0.1427747  | 0.05253452 | -0.2687233 | 0.00021686 |
| 0.11672817 | 0.11357477 | 0.03628949 | 0.62384629 | 0.22015793 | 0.00260209 |
| 0.06739928 | 0.36200415 | -0.0026106 | 0.97186658 | 0.38090911 | 8.85E-08   |
| -0.2345881 | 0.0013086  | -0.2905638 | 6.02E-05   | 0.46831721 | 1.79E-11   |
| -0.0687689 | 0.35230865 | -0.149796  | 0.04183741 | 0.03658764 | 0.62099667 |
| -0.1885965 | 0.01014297 | -0.0159835 | 0.8290347  | 0.35700904 | 6.09E-07   |
| -0.3807822 | 8.95E-08   | -0.3010469 | 3.13E-05   | 0.17678999 | 0.01607102 |
| -0.0008931 | 0.99037373 | -0.0859129 | 0.24492149 | 0.25642094 | 0.00042644 |
| 0.06918421 | 0.34940155 | -0.0647182 | 0.38145749 | 0.27105404 | 0.00019008 |
| -0.0630785 | 0.39366241 | 0.00076609 | 0.99174256 | 0.15690851 | 0.03292873 |
| 0.03537196 | 0.63265063 | -0.0610004 | 0.40946229 | -0.0857505 | 0.24581837 |
| -0.0423496 | 0.56707144 | -0.0653958 | 0.37648149 | 0.24348927 | 0.00083847 |
| -0.3152635 | 1.24E-05   | -0.2553653 | 0.00045124 | 0.38414594 | 6.74E-08   |
| -0.3178189 | 1.04E-05   | -0.2665526 | 0.00024492 | 0.22022898 | 0.00259356 |
| -0.0861158 | 0.24380471 | -0.1893952 | 0.00982282 | 0.27720112 | 0.0001335  |
| 0.01591412 | 0.82976576 | 0.01305594 | 0.85999236 | -0.2363693 | 0.00119863 |
| -0.0669052 | 0.36554184 | -0.2078627 | 0.00452334 | 0.35280674 | 8.42E-07   |
| -0.1035335 | 0.16078525 | -0.1860093 | 0.01124425 | 0.19120296 | 0.00913093 |
| 0.35296278 | 8.32E-07   | 0.14221685 | 0.05347384 | -0.0042276 | 0.95445595 |
| 0.38484657 | 6.35E-08   | 0.11356383 | 0.12376783 | 0.09152138 | 0.21534913 |
| -0.1428926 | 0.05233777 | -0.1074314 | 0.14552083 | -0.0326232 | 0.6593333  |
| -0.1005641 | 0.1731968  | 0.01682533 | 0.82017944 | -0.1253671 | 0.08906807 |
| 0.2096399  | 0.00418355 | 0.10557427 | 0.15265023 | 0.10208782 | 0.16674199 |
| 0.03234623 | 0.66204696 | -0.1439054 | 0.05067253 | 0.18455851 | 0.01190679 |
| 0.10108853 | 0.1709545  | -0.0427697 | 0.56322852 | -0.2563781 | 0.00042742 |
| -0.1217293 | 0.09881641 | -0.1757989 | 0.01668448 | -0.1687951 | 0.02162984 |
| -0.2956982 | 4.38E-05   | -0.167174  | 0.02294008 | -0.2230108 | 0.00227901 |
| -0.1659097 | 0.02400895 | -0.1520906 | 0.03876493 | -0.4794773 | 5.02E-12   |
| 0.35572964 | 6.72E-07   | 0.21417572 | 0.00341801 | -0.2995289 | 3.44E-05   |
| 0.22777104 | 0.00182013 | 0.0677402  | 0.35957548 | 0.19490813 | 0.00784624 |

|            |            |            |            |            |            |
|------------|------------|------------|------------|------------|------------|
| -0.1331807 | 0.07072567 | -0.2342119 | 0.00133297 | 0.16675529 | 0.02328947 |
| 0.38476509 | 6.39E-08   | 0.11904513 | 0.10653637 | -0.2531096 | 0.00050875 |
| 0.03720473 | 0.61511666 | -0.0317953 | 0.66745713 | 0.30435848 | 2.53E-05   |
| 0.43514936 | 6.03E-10   | 0.61975852 | 5.18E-21   | -0.2118308 | 0.00379637 |
| -0.3452401 | 1.49E-06   | -0.1275543 | 0.08358721 | -0.1223957 | 0.09696988 |
| -0.09998   | 0.17571934 | 0.05256476 | 0.47732991 | -0.2075643 | 0.00458277 |
| -0.0743051 | 0.31480142 | 0.01709256 | 0.81737298 | 0.23110881 | 0.00155043 |
| 0.0319594  | 0.66584396 | -0.0787727 | 0.28650496 | 0.21259057 | 0.00366984 |
| -0.3387387 | 2.40E-06   | -0.1128714 | 0.12609005 | -0.0822758 | 0.26554689 |
| 0.36954256 | 2.26E-07   | 0.12309209 | 0.09506987 | 0.3223319  | 7.66E-06   |
| -0.2211053 | 0.00249047 | -0.0279049 | 0.70613729 | -0.1744125 | 0.01757675 |
| 0.20494016 | 0.00513629 | 0.0502943  | 0.49658657 | 0.09497657 | 0.19845206 |
| -0.1532564 | 0.03727827 | -0.2348835 | 0.00128975 | -0.1599866 | 0.02960498 |
| 0.09928929 | 0.17873762 | 0.00167301 | 0.98196842 | -0.1598949 | 0.02969966 |
| -0.0947638 | 0.19946409 | -0.157871  | 0.03185697 | 0.2131728  | 0.00357546 |
| -0.0397446 | 0.5911752  | -0.0598513 | 0.4183578  | -0.1059934 | 0.15101847 |
| 0.23596639 | 0.00122274 | 0.09681471 | 0.18986487 | 0.01878314 | 0.79967395 |
| -0.0195473 | 0.79170656 | -0.0955718 | 0.19564117 | 0.16698563 | 0.02309672 |
| -0.0691386 | 0.34972011 | -0.1525112 | 0.03822288 | 0.12735613 | 0.08407227 |
| -0.2216766 | 0.00242528 | -0.2331794 | 0.00140202 | 0.23197214 | 0.00148689 |
| 0.03269955 | 0.65858643 | 0.17862664 | 0.01498607 | -0.303068  | 2.75E-05   |
| -0.0198023 | 0.78905271 | 0.09054254 | 0.22031766 | -0.012462  | 0.86630071 |
| 0.03178518 | 0.6675568  | -0.0455604 | 0.53802116 | 0.13517306 | 0.06657688 |
| -0.0256182 | 0.72923742 | 0.00693135 | 0.92539615 | 0.12497034 | 0.09009239 |
| -0.2772642 | 0.00013301 | -0.2474563 | 0.00068396 | -0.4430031 | 2.71E-10   |
| 0.10392656 | 0.15919379 | -0.0593327 | 0.4224084  | -0.1751334 | 0.0171077  |
| -0.1222181 | 0.09745919 | -0.075095  | 0.30967    | -0.1540779 | 0.03625982 |
| -0.2050207 | 0.00511846 | -0.0794449 | 0.28240016 | -0.1983966 | 0.00678618 |
| 0.22969324 | 0.00166001 | 0.43206288 | 8.20E-10   | -0.1344114 | 0.06813871 |
| -0.1567608 | 0.03309593 | -0.2140401 | 0.00343893 | -0.3944676 | 2.76E-08   |
| -0.2279559 | 0.00180414 | -0.0949446 | 0.19860387 | -0.1001974 | 0.17477713 |
| -0.2125905 | 0.00366985 | -0.2690406 | 0.00021302 | 0.40460229 | 1.12E-08   |
| 0.05316047 | 0.47234544 | 0.03516492 | 0.63464454 | 0.222577   | 0.00232566 |
| -0.0184461 | 0.80319498 | 0.06012334 | 0.41624162 | 0.10746244 | 0.14540371 |
| -0.0133795 | 0.85655973 | -0.053492  | 0.46958406 | 0.04979168 | 0.50090433 |
| -0.2616889 | 0.00032051 | -0.1684902 | 0.02187125 | 0.12447856 | 0.09137508 |
| 0.02676485 | 0.71762202 | -0.1047157 | 0.15603426 | -0.0222251 | 0.76396171 |
| 0.54923691 | 5.72E-16   | 0.26287214 | 0.00030035 | -0.1716969 | 0.01944528 |
| 0.13794811 | 0.06113161 | 0.02691561 | 0.71609964 | -0.2612515 | 0.00032827 |
| 0.30776112 | 2.03E-05   | 0.06803452 | 0.35748693 | -0.1989204 | 0.00663852 |
| 0.10333628 | 0.16158848 | 0.18174722 | 0.01328894 | -0.2278469 | 0.00181356 |
| -0.286604  | 7.65E-05   | -0.3542156 | 7.56E-07   | 0.238962   | 0.00105365 |
| -0.2052284 | 0.00507269 | -0.3219836 | 7.84E-06   | 0.03343136 | 0.65144193 |
| -0.1032853 | 0.16179645 | -0.0154154 | 0.83502348 | -0.2802326 | 0.0001118  |
| -0.482685  | 3.46E-12   | -0.472354  | 1.14E-11   | 0.29481655 | 4.63E-05   |
| 0.17195948 | 0.01925738 | -0.0364696 | 0.6221244  | 0.18182931 | 0.01324667 |

|            |            |            |            |            |            |
|------------|------------|------------|------------|------------|------------|
| -0.0838535 | 0.25645921 | 0.02604013 | 0.72495594 | -0.1106875 | 0.13363487 |
| -0.2895246 | 6.41E-05   | -0.1623404 | 0.02726043 | -0.2460643 | 0.00073491 |
| -0.1341013 | 0.06878325 | -0.036002  | 0.62659939 | -0.0246348 | 0.739248   |
| -0.1381222 | 0.0608026  | -0.0302529 | 0.68269465 | -0.0273765 | 0.71145212 |
| -0.1675949 | 0.0225935  | -0.1103643 | 0.13478032 | 0.19077479 | 0.00929078 |
| 0.50431403 | 2.50E-13   | 0.25413024 | 0.00048194 | -0.1217803 | 0.09867399 |
| 0.06694088 | 0.3652857  | 0.09580384 | 0.19455309 | 0.18423016 | 0.01206141 |
| -0.11428   | 0.12140095 | -0.0884595 | 0.23116115 | -0.2938872 | 4.90E-05   |
| -0.1536267 | 0.03681618 | -0.0564055 | 0.44569889 | 0.24564203 | 0.00075104 |
| -0.2158144 | 0.00317418 | -0.1715931 | 0.01951996 | 0.25464869 | 0.00046882 |
| -0.2338436 | 0.00135724 | -0.1351686 | 0.06658598 | 0.14838657 | 0.04382411 |
| -0.2039922 | 0.00535053 | -0.0747053 | 0.31219429 | -0.305896  | 2.29E-05   |
| -0.4085651 | 7.77E-09   | -0.2919247 | 5.53E-05   | 0.1808881  | 0.01373848 |
| -0.0722789 | 0.32821492 | 0.13535296 | 0.06621224 | -0.1913159 | 0.00908919 |
| -0.3604073 | 4.67E-07   | -0.3145023 | 1.30E-05   | 0.34769471 | 1.24E-06   |
| -0.1217389 | 0.09878951 | -0.2327033 | 0.00143495 | 0.24037984 | 0.00098135 |
| 0.04435185 | 0.54886832 | -0.1127985 | 0.12633648 | 0.13294191 | 0.07123673 |
| -0.2170172 | 0.00300534 | -0.3346947 | 3.22E-06   | 0.13249203 | 0.07220771 |
| -0.2390674 | 0.00104812 | -0.2486074 | 0.00064431 | 0.08554117 | 0.24697705 |
| -0.1815786 | 0.01337615 | -0.0687543 | 0.3524116  | -0.1402979 | 0.0568119  |
| -0.1593628 | 0.0302544  | -0.0843873 | 0.2534329  | -0.2237444 | 0.00220205 |
| 0.02753702 | 0.70983635 | -0.016575  | 0.82281083 | 0.27489585 | 0.00015256 |
| -0.2695114 | 0.00020743 | -0.3147344 | 1.28E-05   | 0.45739505 | 5.94E-11   |
| -0.1677158 | 0.02249475 | -0.1891026 | 0.00993905 | 0.21202342 | 0.00376392 |
| -0.160671  | 0.02890618 | -0.0917191 | 0.2143551  | -0.1585025 | 0.03116997 |
| -0.0529381 | 0.4742031  | 0.0726972  | 0.3254161  | -0.2042323 | 0.00529554 |
| -0.1424653 | 0.05305385 | -0.2325564 | 0.00144525 | 0.1830822  | 0.01261598 |
| -0.1086397 | 0.14101979 | -0.1744754 | 0.01753539 | 0.10455085 | 0.15669021 |
| -0.1674454 | 0.02271609 | -0.2228486 | 0.00229636 | 0.12013734 | 0.10333966 |
| 0.04635512 | 0.53094683 | 0.25701854 | 0.00041297 | -0.3889329 | 4.47E-08   |
| -0.0483091 | 0.51375464 | 0.01844985 | 0.80315547 | 0.1225356  | 0.09658585 |
| 0.12917108 | 0.07971238 | 0.09571629 | 0.19496308 | 0.39725361 | 2.16E-08   |
| -0.1451131 | 0.04874466 | -0.0870047 | 0.23895385 | -0.0428439 | 0.56255127 |
| -0.2168451 | 0.00302899 | -0.0350091 | 0.63614728 | -0.2928915 | 5.21E-05   |
| -0.2357859 | 0.00123368 | -0.1776638 | 0.01554658 | -0.1757365 | 0.01672378 |
| -0.2255764 | 0.00202007 | -0.2505183 | 0.00058315 | 0.33974074 | 2.23E-06   |
| -0.1500574 | 0.04147741 | -0.0046301 | 0.9501249  | -0.0477397 | 0.51873472 |
| 0.16603366 | 0.02390229 | -0.0055749 | 0.93996531 | 0.15056062 | 0.04079164 |
| 0.04264173 | 0.56439795 | -0.0399172 | 0.58956394 | 0.20541287 | 0.00503236 |
| -0.2176983 | 0.00291338 | -0.2437489 | 0.00082745 | 0.32444719 | 6.62E-06   |
| 0.0111467  | 0.88030023 | 0.05201389 | 0.4819645  | 0.41224428 | 5.53E-09   |
| 0.11888846 | 0.10700123 | 0.04654927 | 0.52922572 | 0.01464661 | 0.84314221 |
| 0.08976403 | 0.22432712 | 0.00283381 | 0.96946224 | -0.1705697 | 0.02027004 |
| 0.00975103 | 0.89519588 | -0.0803008 | 0.27723034 | 0.47820351 | 5.82E-12   |
| -0.1640206 | 0.02568568 | -0.1210875 | 0.10062073 | -0.2198469 | 0.00263972 |
| -0.1877903 | 0.01047548 | -0.2225339 | 0.00233034 | 0.24991209 | 0.00060195 |



|            |            |            |            |            |            |
|------------|------------|------------|------------|------------|------------|
| -0.1779874 | 0.01535621 | -0.2000763 | 0.00632284 | 0.26869369 | 0.00021722 |
| -0.3518423 | 9.06E-07   | 0.05317749 | 0.47220341 | -0.2996398 | 3.42E-05   |
| 0.49188664 | 1.16E-12   | 0.36747014 | 2.67E-07   | -0.355171  | 7.02E-07   |
| -0.3279904 | 5.17E-06   | -0.1327553 | 0.07163826 | 0.09847439 | 0.18234748 |
| 0.06199192 | 0.40187745 | -0.0507571 | 0.49262817 | 0.2272723  | 0.00186391 |
| 0.20251339 | 0.00570076 | 0.06706548 | 0.36439194 | 0.23925578 | 0.00103828 |
| -0.1458903 | 0.04753654 | -0.3203022 | 8.80E-06   | 0.17412849 | 0.01776455 |
| -0.1727751 | 0.01868376 | -0.1574402 | 0.03233298 | 0.18589595 | 0.01129482 |
| -0.0878955 | 0.234161   | 0.00800894 | 0.91383958 | -0.252123  | 0.00053598 |
| 0.27579367 | 0.00014485 | 0.16599801 | 0.02393293 | -0.3162186 | 1.16E-05   |
| -0.0119518 | 0.87172603 | -0.0393988 | 0.59440969 | 0.36320076 | 3.75E-07   |
| -0.0033539 | 0.96386104 | -0.0893865 | 0.22628982 | -0.0904142 | 0.220975   |
| -0.1541092 | 0.03622142 | -0.0875146 | 0.23620192 | -0.2195818 | 0.00267217 |
| -0.029863  | 0.68656694 | -0.2191803 | 0.00272201 | 0.20125844 | 0.0060139  |
| -0.0550292 | 0.45689538 | -0.2022544 | 0.00576415 | 0.15556327 | 0.03447791 |
| -0.17909   | 0.01472265 | -0.1808946 | 0.01373501 | 0.10751452 | 0.14520759 |
| -0.2461672 | 0.00073103 | -0.0551553 | 0.45586334 | 0.04179289 | 0.5721834  |
| 0.16573469 | 0.02416023 | -0.0303049 | 0.68217923 | 0.17491506 | 0.01724861 |
| -0.2548558 | 0.00046367 | -0.3158108 | 1.19E-05   | 0.21990974 | 0.00263207 |
| 0.12311583 | 0.09500564 | -0.0161003 | 0.82780487 | 0.19070082 | 0.00931864 |
| 0.0611775  | 0.40810143 | -0.0205911 | 0.78085843 | 0.20437329 | 0.00526347 |
| -0.1773718 | 0.01572012 | -0.1892095 | 0.00989645 | 0.16814495 | 0.02214736 |
| -0.3209307 | 8.43E-06   | -0.3223047 | 7.67E-06   | 0.28292873 | 9.53E-05   |
| -0.1860252 | 0.01123717 | -0.0773986 | 0.29502072 | 0.09243445 | 0.21078713 |
| 0.11537366 | 0.11785465 | 0.00084982 | 0.99084007 | -0.2334237 | 0.00138539 |
| -0.3449257 | 1.52E-06   | -0.1720321 | 0.01920569 | -0.1577852 | 0.0319513  |
| -0.2278128 | 0.0018165  | -0.2674723 | 0.00023264 | 0.19680437 | 0.00725306 |
| 0.04511824 | 0.5419773  | 0.31829023 | 1.01E-05   | -0.3241618 | 6.75E-06   |
| 0.02353499 | 0.75049645 | 0.04446196 | 0.54787568 | -0.2575474 | 0.00040138 |
| -0.0562882 | 0.44664733 | 0.04068082 | 0.58245904 | -0.1214827 | 0.09950652 |
| 0.08650091 | 0.24169487 | 0.04632082 | 0.53125117 | -0.1115481 | 0.13062133 |
| 0.32417006 | 6.75E-06   | 0.4945411  | 8.39E-13   | -0.1858598 | 0.01131099 |
| 0.0750063  | 0.31024342 | 0.13701093 | 0.06292812 | -0.1571473 | 0.03265998 |
| -0.0728635 | 0.3243076  | -0.0372208 | 0.61496366 | 0.18484451 | 0.01177352 |
| -0.0024143 | 0.97398142 | -0.1269435 | 0.08508979 | 0.28486937 | 8.49E-05   |
| -0.2433656 | 0.00084376 | -0.0937912 | 0.20413687 | 0.01970359 | 0.79007966 |
| -0.4027047 | 1.33E-08   | -0.3004085 | 3.26E-05   | 0.12710008 | 0.08470247 |
| -0.1674324 | 0.02272677 | -0.1124868 | 0.12739421 | 0.20514084 | 0.00509194 |
| 0.33987024 | 2.21E-06   | 0.15152642 | 0.03950219 | -0.1868412 | 0.01087919 |
| -0.2555709 | 0.0004463  | -0.3765414 | 1.27E-07   | 0.23575298 | 0.00123569 |
| -0.0437458 | 0.55434761 | -0.0082969 | 0.91075466 | -0.448885  | 1.47E-10   |
| -0.1795236 | 0.01447987 | -0.2050538 | 0.00511113 | 0.3920008  | 3.43E-08   |
| -0.1126973 | 0.12667908 | -0.0243508 | 0.74214767 | -0.4403067 | 3.57E-10   |
| 0.21033696 | 0.00405668 | 0.04282293 | 0.56274259 | 0.27502932 | 0.00015139 |
| -0.1609612 | 0.02861411 | -0.240952  | 0.00095349 | 0.19500177 | 0.00781597 |
| -0.2673452 | 0.0002343  | -0.2566115 | 0.0004221  | 0.16015339 | 0.02943336 |

|            |            |            |            |            |            |
|------------|------------|------------|------------|------------|------------|
| -0.23816   | 0.00109668 | -0.2690211 | 0.00021325 | 0.34068961 | 2.08E-06   |
| 0.06409603 | 0.38606087 | -0.0610923 | 0.40875618 | 0.3724706  | 1.78E-07   |
| 0.11191922 | 0.12933803 | 0.30294194 | 2.77E-05   | -0.0033455 | 0.9639514  |
| -0.1076345 | 0.1447567  | -0.1505364 | 0.04082449 | -0.144257  | 0.05010482 |
| -0.0395493 | 0.5930017  | -0.1449543 | 0.04899467 | 0.26743046 | 0.00023319 |
| 0.01096984 | 0.88218566 | 0.02706991 | 0.71454257 | 0.44156471 | 3.14E-10   |
| -0.2543349 | 0.00047672 | -0.0336301 | 0.64950727 | -0.173673  | 0.01806944 |
| -0.5550712 | 2.42E-16   | -0.3310819 | 4.16E-06   | 0.05161725 | 0.48531649 |
| 0.0693034  | 0.34856996 | 0.06221372 | 0.40019225 | -0.3637608 | 3.59E-07   |
| 0.42410042 | 1.79E-09   | 0.25360705 | 0.00049551 | -0.2350341 | 0.00128023 |
| -0.2172952 | 0.00296749 | -0.0795602 | 0.28169978 | -0.3571851 | 6.01E-07   |
| -0.4288114 | 1.13E-09   | -0.4347021 | 6.30E-10   | 0.21640762 | 0.00308987 |
| 0.03834415 | 0.60432396 | -0.1196    | 0.10490278 | 0.13962297 | 0.05802601 |
| 0.26084565 | 0.00033563 | 0.20078335 | 0.0061364  | -0.2617328 | 0.00031974 |
| -0.3252558 | 6.26E-06   | -0.2650452 | 0.00026636 | 0.21680165 | 0.00303499 |
| 0.12673017 | 0.08561963 | -0.024968  | 0.7358514  | 0.13992773 | 0.05747515 |
| 0.15995052 | 0.02964221 | 0.06130877 | 0.40709439 | 0.15730128 | 0.03248771 |
| -0.3206499 | 8.59E-06   | -0.1599798 | 0.02961194 | -0.1993703 | 0.00651401 |
| -0.0722795 | 0.32821092 | -0.1733631 | 0.0182794  | 0.2358265  | 0.00123121 |
| -0.0340855 | 0.64508233 | -0.0958127 | 0.19451164 | 0.24502133 | 0.00077534 |
| -0.1274336 | 0.08388227 | -0.1265879 | 0.08597456 | 0.2248652  | 0.00208902 |
| 0.11073317 | 0.13347353 | -0.0586189 | 0.42802212 | 0.10594354 | 0.15121199 |
| 0.09363989 | 0.20487109 | -0.0606027 | 0.41252854 | 0.13440771 | 0.06814645 |
| 0.10524282 | 0.15394996 | -0.0352887 | 0.63345244 | 0.34514973 | 1.50E-06   |
| -0.1353815 | 0.06615452 | -0.1753718 | 0.01695505 | 0.25156114 | 0.00055208 |
| 0.00477102 | 0.94860916 | -0.084967  | 0.25017498 | 0.13116312 | 0.07513887 |
| 0.18062338 | 0.01387966 | 0.0809926  | 0.27309919 | 0.22052294 | 0.00255856 |
| 0.18274809 | 0.01278154 | 0.04336856 | 0.55777203 | 0.26295572 | 0.00029897 |
| 0.24862729 | 0.00064365 | 0.19090454 | 0.00924208 | -0.1322442 | 0.07274721 |
| 0.01346179 | 0.85568684 | -0.0234563 | 0.75130275 | 0.1901996  | 0.00950942 |
| -0.1513044 | 0.03979553 | -0.0402836 | 0.58614961 | -0.428865  | 1.13E-09   |
| -0.0478539 | 0.51773369 | 0.00738485 | 0.92053054 | -0.2138289 | 0.00347173 |
| -0.0546541 | 0.45997391 | -0.1075269 | 0.1451611  | 0.13472351 | 0.06749519 |
| 0.58239703 | 3.45E-18   | 0.31004045 | 1.75E-05   | -0.1249053 | 0.09026125 |
| -0.2222693 | 0.00235928 | -0.1781558 | 0.01525791 | -0.3125052 | 1.49E-05   |
| 0.23302397 | 0.00141269 | 0.29133561 | 5.74E-05   | -0.0586491 | 0.4277833  |
| 0.05890602 | 0.42575893 | -0.0876633 | 0.23540376 | 0.09418996 | 0.20221164 |
| -0.1106529 | 0.13375687 | 0.1535507  | 0.03691063 | -0.2865652 | 7.67E-05   |
| -0.0534999 | 0.46951835 | -0.1469763 | 0.04589054 | 0.07062703 | 0.3394189  |
| -0.1705411 | 0.02029138 | -0.1999661 | 0.00635236 | 0.28689232 | 7.52E-05   |
| -0.2095071 | 0.00420813 | -0.3349278 | 3.16E-06   | 0.35825515 | 5.53E-07   |
| 0.51840414 | 4.09E-14   | 0.26035554 | 0.00034472 | -0.1287706 | 0.08065835 |
| -0.2524279 | 0.00052742 | -0.2023087 | 0.00575082 | 0.23854417 | 0.00107587 |
| 0.43128254 | 8.86E-10   | 0.16716807 | 0.02294504 | -0.1145654 | 0.12046781 |
| 0.13205769 | 0.07315533 | 0.05502894 | 0.45689744 | 0.10012257 | 0.17510111 |
| -0.0615224 | 0.40545844 | -0.0275019 | 0.71018944 | -0.4334628 | 7.13E-10   |

|            |            |            |            |            |            |
|------------|------------|------------|------------|------------|------------|
| -0.2279179 | 0.00180742 | -0.1351944 | 0.06653344 | -0.1271674 | 0.08453653 |
| -0.0448127 | 0.54471915 | -0.2332893 | 0.00139451 | 0.06052651 | 0.41311723 |
| -0.0124044 | 0.86691282 | -0.236382  | 0.00119788 | 0.10392361 | 0.15920569 |
| -0.0943153 | 0.2016093  | -0.0978793 | 0.18501737 | 0.20159902 | 0.00592743 |
| -0.4488627 | 1.47E-10   | -0.1907333 | 0.00930641 | -0.0763841 | 0.30141428 |
| -0.1603041 | 0.02927899 | -0.1021399 | 0.16652447 | 0.0854803  | 0.24731475 |
| -0.4341222 | 6.68E-10   | -0.1555649 | 0.03447598 | 0.43637927 | 5.32E-10   |
| -0.0018576 | 0.97997914 | 0.07848185 | 0.28829367 | -0.4726694 | 1.10E-11   |
| -0.3087963 | 1.90E-05   | -0.2910373 | 5.84E-05   | -0.0273604 | 0.71161435 |
| -0.0193703 | 0.79355022 | 0.08740059 | 0.2368153  | -0.2178392 | 0.00289467 |
| -0.2856945 | 8.08E-05   | -0.1345864 | 0.06777738 | -0.2437966 | 0.00082544 |
| 0.10894694 | 0.13989222 | 0.18379818 | 0.01226753 | -0.4505599 | 1.23E-10   |
| -0.2720211 | 0.0001799  | -0.1962005 | 0.00743748 | -0.2844304 | 8.72E-05   |
| -0.0705446 | 0.33998415 | -0.0366299 | 0.62059346 | -0.4913938 | 1.23E-12   |
| -0.1043036 | 0.15767836 | -0.0518515 | 0.4833355  | 0.15327243 | 0.03725814 |
| -0.0349623 | 0.63659887 | -0.0995309 | 0.1776774  | -0.4104942 | 6.50E-09   |
| -0.1323805 | 0.07245016 | -0.1679915 | 0.02227102 | 0.28904431 | 6.60E-05   |
| -0.0818055 | 0.26829808 | -0.1098933 | 0.13646273 | -0.2270461 | 0.00188409 |
| -0.1651108 | 0.02470622 | -0.1190668 | 0.10647222 | -0.2983377 | 3.71E-05   |
| -0.0879118 | 0.23407384 | -0.0182904 | 0.80482269 | -0.2785605 | 0.00012332 |
| -0.2252007 | 0.00205623 | -0.2020771 | 0.00580792 | -0.2069181 | 0.00471386 |
| 0.05819266 | 0.43139425 | 0.01602952 | 0.82855037 | 0.34698137 | 1.31E-06   |
| 0.08208634 | 0.26665308 | -0.1181707 | 0.10915122 | 0.19400443 | 0.00814381 |
| -0.1749904 | 0.01719986 | -0.0055666 | 0.94005398 | 0.25924958 | 0.00036609 |
| -0.0073751 | 0.92063471 | 0.00379532 | 0.95910859 | -0.3544707 | 7.41E-07   |
| -0.0848504 | 0.25082833 | -0.0862988 | 0.24280057 | -0.28163   | 0.00010295 |
| 0.03936756 | 0.59470259 | -0.0282816 | 0.70235665 | 0.20565047 | 0.00498084 |
| -0.0079296 | 0.91469043 | -0.0502311 | 0.49712808 | -0.0723275 | 0.32788898 |
| -0.3133694 | 1.40E-05   | -0.2917371 | 5.60E-05   | 0.03629629 | 0.62378124 |
| 0.00969055 | 0.89584216 | -0.0769832 | 0.29762748 | -0.068822  | 0.35193632 |
| 0.19633509 | 0.00739602 | 0.06404845 | 0.3864143  | -0.1300222 | 0.07773156 |
| 0.17496737 | 0.01721476 | 0.31699018 | 1.10E-05   | -0.181213  | 0.01356694 |
| 0.06307365 | 0.39369851 | -0.1196393 | 0.10478774 | 0.20901541 | 0.00430024 |
| 0.32003117 | 8.96E-06   | 0.16287254 | 0.02675298 | -0.2382773 | 0.00109029 |
| -0.0371976 | 0.61518428 | -0.060864  | 0.41051211 | 0.06902713 | 0.35049938 |
| -0.2135769 | 0.00351125 | -0.0701446 | 0.34273652 | 0.08406201 | 0.25527412 |
| 0.06336556 | 0.39150857 | 0.00970747 | 0.89566132 | -0.2224433 | 0.00234022 |
| -0.2751006 | 0.00015077 | -0.2112053 | 0.00390347 | 0.17741213 | 0.01569607 |
| 0.19042626 | 0.00942272 | 0.01904756 | 0.79691458 | 0.22447515 | 0.00212775 |
| -0.3313396 | 4.09E-06   | -0.2033987 | 0.00548871 | 0.53846267 | 2.67E-15   |
| -0.1993443 | 0.00652116 | -0.110097  | 0.13573322 | -0.2163215 | 0.00310198 |
| 0.12590879 | 0.08768458 | 0.30680123 | 2.16E-05   | -0.2416689 | 0.0009196  |
| 0.48223477 | 3.64E-12   | 0.27206581 | 0.00017944 | -0.1696906 | 0.02093411 |
| -0.1109565 | 0.13268733 | 0.01072956 | 0.88474814 | -0.0081887 | 0.91191303 |
| -0.2899913 | 6.23E-05   | -0.2306631 | 0.0015842  | 0.25120595 | 0.00056249 |
| -0.2529316 | 0.00051357 | -0.2433083 | 0.00084623 | 0.12871218 | 0.08079717 |

|            |            |            |            |            |            |
|------------|------------|------------|------------|------------|------------|
| -0.0710774 | 0.33634019 | 0.03497461 | 0.63647964 | 0.08185656 | 0.26799863 |
| -0.119841  | 0.10419943 | -0.2657919 | 0.00025553 | 0.19991726 | 0.00636546 |
| 0.03161306 | 0.66925077 | -0.0979544 | 0.18467872 | 0.24369113 | 0.00082989 |
| 0.3629655  | 3.82E-07   | 0.16927494 | 0.0212546  | -0.1022595 | 0.16602599 |
| -0.0990025 | 0.18000203 | -0.0411905 | 0.5777387  | -0.0242733 | 0.74293996 |
| -0.0268691 | 0.71656963 | -0.0046499 | 0.94991232 | 0.24576792 | 0.0007462  |
| 0.03530675 | 0.63327837 | -0.0492733 | 0.50537819 | -0.2784128 | 0.00012439 |
| 0.06057988 | 0.41270462 | -0.068792  | 0.35214701 | -0.1806246 | 0.01387902 |
| -0.0843672 | 0.25354684 | -0.097572  | 0.18640729 | 0.25019157 | 0.00059321 |
| -0.1389754 | 0.05921099 | -0.1798001 | 0.01432686 | 0.29373799 | 4.95E-05   |
| -0.1688018 | 0.02162453 | -0.0458648 | 0.53530583 | -0.1240875 | 0.09240532 |
| 0.47565028 | 7.81E-12   | 0.28631465 | 7.78E-05   | -0.0852261 | 0.24872852 |
| -0.0432299 | 0.5590334  | -0.0295121 | 0.69005912 | -0.2491865 | 0.00062518 |
| 0.06927719 | 0.34875266 | 0.08194776 | 0.26746401 | -0.157435  | 0.03233874 |
| -0.0254234 | 0.7312171  | -0.0699549 | 0.34404648 | 0.14960288 | 0.04210509 |
| -0.0476053 | 0.51991374 | -0.0339725 | 0.64617933 | -0.2805648 | 0.00010964 |
| -0.0823858 | 0.26490622 | -0.1503728 | 0.0410465  | 0.1562119  | 0.0337234  |
| -0.2709826 | 0.00019085 | -0.2526879 | 0.00052023 | -0.0407954 | 0.58139639 |
| -0.050945  | 0.49102583 | -0.1303361 | 0.07701125 | 0.1144059  | 0.12098861 |
| -0.3174967 | 1.06E-05   | -0.2099105 | 0.00413389 | 0.0803024  | 0.27722089 |
| -0.136939  | 0.06306775 | -0.087622  | 0.23562514 | 0.30658147 | 2.19E-05   |
| 0.57416287 | 1.29E-17   | 0.40123276 | 1.51E-08   | -0.2346744 | 0.00130306 |
| -0.2738817 | 0.00016173 | -0.1955966 | 0.00762608 | 0.09649221 | 0.19135148 |
| -0.2327082 | 0.0014346  | -0.1285483 | 0.08118751 | -0.3564166 | 6.38E-07   |
| 0.05623252 | 0.4470975  | -0.0447152 | 0.54559601 | 0.19504014 | 0.00780359 |
| -0.0686369 | 0.353236   | -0.1296157 | 0.07867257 | 0.21052078 | 0.0040238  |
| -0.1967465 | 0.00727056 | 0.01254907 | 0.8653754  | -0.4068178 | 9.12E-09   |
| -0.0180728 | 0.80709864 | -0.2458789 | 0.00074195 | 0.11918503 | 0.10612263 |
| 0.65784436 | 2.62E-24   | 0.30016533 | 3.31E-05   | -0.2723533 | 0.00017652 |
| 0.37823656 | 1.11E-07   | 0.29630729 | 4.22E-05   | -0.154214  | 0.03609333 |
| 0.16115369 | 0.02842181 | 0.16058245 | 0.02899578 | 0.20366576 | 0.00542615 |
| -0.0057975 | 0.93757277 | 0.01956599 | 0.79151198 | -0.2371211 | 0.00115482 |
| -0.2007869 | 0.00613546 | -0.0045295 | 0.95120748 | -0.0721559 | 0.32904101 |
| 0.04782785 | 0.51796206 | -0.1451827 | 0.04863542 | 0.27547458 | 0.00014755 |
| -0.0129183 | 0.86145329 | -0.1957034 | 0.0075924  | 0.2659554  | 0.00025321 |
| -0.2619773 | 0.00031548 | 0.01405473 | 0.84940424 | -0.0090125 | 0.90309328 |
| -0.086128  | 0.24373774 | -0.231037  | 0.00155583 | 0.24700115 | 0.00070025 |
| -0.2062057 | 0.00486228 | -0.2852016 | 8.32E-05   | 0.21334426 | 0.00354809 |
| -0.2340655 | 0.00134257 | -0.2311597 | 0.00154662 | -0.3808045 | 8.93E-08   |
| -0.0129453 | 0.86116708 | -0.1627934 | 0.02682794 | 0.17952641 | 0.0144783  |
| 0.29717255 | 3.99E-05   | 0.22309155 | 0.00227042 | -0.0675505 | 0.3609259  |
| 0.04364859 | 0.55522926 | -0.0605693 | 0.41278654 | -0.3186864 | 9.82E-06   |
| -0.2649056 | 0.00026843 | -0.2542235 | 0.00047955 | 0.06610008 | 0.37135256 |
| -0.1963154 | 0.00740206 | -0.1412283 | 0.05517249 | -0.2331922 | 0.00140114 |
| -0.0862489 | 0.24307416 | -0.0128377 | 0.86230941 | -0.0525957 | 0.47707071 |
| -0.2538902 | 0.00048812 | -0.255051  | 0.00045887 | -0.0025421 | 0.97260448 |

|            |            |            |            |            |            |
|------------|------------|------------|------------|------------|------------|
| -0.0900665 | 0.2227633  | -0.0934096 | 0.20599207 | -0.470433  | 1.41E-11   |
| 0.48816168 | 1.81E-12   | 0.29083018 | 5.92E-05   | -0.2967339 | 4.11E-05   |
| 0.31383938 | 1.36E-05   | 0.15004085 | 0.04150012 | 0.14532853 | 0.04840729 |
| -0.1745756 | 0.01746968 | -0.1903711 | 0.00944374 | 0.49287852 | 1.03E-12   |
| -0.2992261 | 3.51E-05   | -0.170373  | 0.02041704 | -0.2945546 | 4.70E-05   |
| 0.10901294 | 0.13965093 | 0.13735696 | 0.06225983 | -0.3970314 | 2.20E-08   |
| -0.0523105 | 0.47946584 | -0.1051348 | 0.15437536 | 0.19990787 | 0.00636799 |
| 0.42088973 | 2.44E-09   | 0.26422741 | 0.00027871 | -0.2407064 | 0.00096536 |
| -0.1816427 | 0.01334294 | -0.2172493 | 0.00297371 | -0.1845672 | 0.01190272 |
| 0.11162482 | 0.13035522 | -0.0306421 | 0.67883794 | 0.15209468 | 0.03875967 |
| -0.0694102 | 0.34782569 | -0.2479098 | 0.00066808 | 0.08652894 | 0.24154179 |
| 0.00458539 | 0.9506061  | -0.1338059 | 0.06940165 | 0.21445559 | 0.00337521 |
| -0.0651126 | 0.37855674 | -0.1049022 | 0.15529432 | -0.2451381 | 0.00077072 |
| 0.1969781  | 0.00720076 | 0.07645851 | 0.30094236 | -0.1169169 | 0.11298815 |
| 0.34309951 | 1.74E-06   | 0.16835561 | 0.02197851 | 0.05044201 | 0.49532141 |
| -0.3055617 | 2.34E-05   | -0.1780828 | 0.01530047 | 0.06612447 | 0.37117566 |
| 0.08754805 | 0.23602217 | -0.2129557 | 0.00361039 | 0.16937204 | 0.02117936 |
| -0.0678974 | 0.35845903 | -0.0675953 | 0.36060632 | 0.26658063 | 0.00024454 |
| -0.1535586 | 0.03690079 | -0.221319  | 0.0024659  | 0.17994196 | 0.01424892 |
| -0.4530355 | 9.48E-11   | -0.3400207 | 2.19E-06   | 0.28617395 | 7.85E-05   |
| 0.24677794 | 0.00070837 | 0.10207647 | 0.16678942 | 0.04065741 | 0.58267628 |
| -0.1686172 | 0.02177043 | -0.1011962 | 0.17049673 | 0.33835042 | 2.47E-06   |
| 0.24744742 | 0.00068428 | 0.17704588 | 0.01591587 | -0.2138807 | 0.00346366 |
| -0.5144161 | 6.89E-14   | -0.3804029 | 9.24E-08   | 0.26437343 | 0.00027646 |
| -0.3103614 | 1.71E-05   | -0.256662  | 0.00042096 | -0.095246  | 0.19717613 |
| -0.4520774 | 1.05E-10   | -0.3512676 | 9.46E-07   | 0.11931578 | 0.10573706 |
| 0.12416291 | 0.09220603 | -0.0202938 | 0.7839436  | 0.27118575 | 0.00018866 |
| -0.211384  | 0.0038726  | -0.3010944 | 3.12E-05   | 0.06435228 | 0.38416078 |
| -0.3764421 | 1.28E-07   | -0.2397719 | 0.00101178 | 0.53405142 | 4.94E-15   |
| -0.1047635 | 0.15584409 | -0.1901282 | 0.00953688 | 0.02165166 | 0.76987941 |
| -0.1063497 | 0.14964211 | -0.0832162 | 0.26010416 | 0.20551883 | 0.00500933 |
| -0.2136087 | 0.00350624 | -0.2535242 | 0.0004977  | -0.2968191 | 4.08E-05   |
| -0.2907098 | 5.96E-05   | -0.1487181 | 0.04334985 | -0.0929662 | 0.20816226 |
| -0.3609611 | 4.48E-07   | -0.2702852 | 0.00019855 | 0.03777116 | 0.60974084 |
| -0.0559363 | 0.449498   | -0.1758488 | 0.0166531  | 0.08947118 | 0.22584867 |
| 0.06329918 | 0.39200591 | 0.02003138 | 0.7866705  | 0.13436974 | 0.06822509 |
| 0.08773937 | 0.23499594 | 0.08854087 | 0.23073066 | -0.1871152 | 0.01076125 |
| 0.16104572 | 0.02852955 | 0.15795239 | 0.03176768 | -0.2794284 | 0.00011721 |
| -0.1462016 | 0.04705979 | -0.1744292 | 0.01756572 | 0.18051174 | 0.01393957 |
| -0.3616597 | 4.24E-07   | -0.0825769 | 0.26379597 | -0.2881917 | 6.95E-05   |
| -0.2938965 | 4.90E-05   | -0.3390799 | 2.34E-06   | 0.09778195 | 0.18545676 |
| 0.01122454 | 0.87947073 | -0.0519595 | 0.48242375 | -0.0091308 | 0.90182712 |
| -0.228609  | 0.00174867 | -0.2842924 | 8.79E-05   | 0.26382008 | 0.00028505 |
| 0.10805844 | 0.14317145 | 0.0092037  | 0.90104763 | 0.31831413 | 1.01E-05   |
| 0.01898201 | 0.79759845 | -0.0741309 | 0.31594038 | 0.18308275 | 0.01261571 |
| -0.2398294 | 0.00100886 | -0.2476378 | 0.00067756 | 0.48115931 | 4.13E-12   |

|            |            |            |            |            |            |
|------------|------------|------------|------------|------------|------------|
| -0.2458836 | 0.00074177 | -0.1740425 | 0.01782176 | 0.09266659 | 0.20963842 |
| -0.2025183 | 0.00569957 | -0.2047198 | 0.00518541 | 0.18685988 | 0.0108711  |
| 0.01692416 | 0.81914122 | -0.1194295 | 0.10540276 | 0.38011516 | 9.46E-08   |
| 0.26337802 | 0.00029209 | 0.25103812 | 0.00056747 | -0.3526807 | 8.50E-07   |
| -0.1460549 | 0.04728396 | 0.04282722 | 0.56270348 | -0.1987946 | 0.00667373 |
| -0.1178245 | 0.11020052 | -0.0617628 | 0.40362242 | -0.1875626 | 0.01057111 |
| -0.1610208 | 0.02855443 | -0.1541991 | 0.03611149 | 0.04441409 | 0.54830712 |
| 0.13103573 | 0.07542484 | -0.0774194 | 0.29489028 | 0.31167679 | 1.57E-05   |
| 0.19371136 | 0.00824244 | 0.36097496 | 4.47E-07   | -0.2673335 | 0.00023446 |
| -0.4145828 | 4.44E-09   | -0.3831023 | 7.36E-08   | 0.16188501 | 0.0277012  |
| -0.0132227 | 0.85822292 | -0.0860059 | 0.24440946 | 0.26072066 | 0.00033793 |
| 0.05003949 | 0.49877309 | -0.020821  | 0.77847437 | 0.21457321 | 0.00335736 |
| -0.2439904 | 0.00081732 | -0.3080238 | 2.00E-05   | 0.21701881 | 0.00300512 |
| 0.05522415 | 0.45529984 | 0.24801753 | 0.00066436 | 0.40827878 | 7.98E-09   |
| -0.0013917 | 0.98499969 | 0.0174493  | 0.81363018 | -0.1075339 | 0.14513483 |
| -0.2184235 | 0.00281826 | -0.2315993 | 0.00151404 | 0.13305493 | 0.07099448 |
| 0.07814351 | 0.29038364 | 0.1828942  | 0.0127089  | -0.3446837 | 1.55E-06   |
| -0.4053194 | 1.05E-08   | -0.3601125 | 4.78E-07   | 0.14827287 | 0.04398777 |
| -0.1875012 | 0.010597   | -0.1967631 | 0.00726553 | 0.1663219  | 0.02365587 |
| 0.20724669 | 0.00464678 | 0.0382657  | 0.60506427 | -0.2021042 | 0.00580122 |
| 0.22935294 | 0.00168739 | 0.12896072 | 0.08020819 | -0.345434  | 1.47E-06   |
| 0.08177892 | 0.26845433 | -0.0560614 | 0.44848334 | 0.21846433 | 0.00281299 |
| -0.2712913 | 0.00018753 | -0.1979522 | 0.00691371 | 0.00624498 | 0.93276546 |
| -0.1408371 | 0.05585702 | -0.2117888 | 0.00380348 | 0.218198   | 0.00284753 |
| -0.0597395 | 0.41922914 | -0.1116306 | 0.13033518 | 0.14638486 | 0.04678095 |
| -0.192811  | 0.00855211 | -0.2245197 | 0.00212329 | 0.1237069  | 0.09341709 |
| -0.0799606 | 0.27927766 | -0.1247437 | 0.09068163 | 0.17842594 | 0.01510142 |
| -0.2253729 | 0.00203958 | -0.3030256 | 2.76E-05   | 0.16323812 | 0.02640906 |
| -0.1132355 | 0.12486487 | -0.1117772 | 0.12982784 | 0.22665031 | 0.00191986 |
| -0.0594805 | 0.42125185 | -0.0952139 | 0.19732782 | 0.0108905  | 0.88303161 |
| 0.07951338 | 0.28198404 | -0.0202353 | 0.78455212 | 0.21865464 | 0.00278855 |
| 0.16879304 | 0.02163145 | -0.0080481 | 0.91342009 | -0.2075647 | 0.00458269 |
| 0.16875732 | 0.02165962 | 0.03165117 | 0.66887554 | 0.26875137 | 0.00021652 |
| -0.0529519 | 0.47408762 | -0.2107411 | 0.00398472 | 0.21920533 | 0.00271888 |
| 0.14879463 | 0.04324096 | 0.08137057 | 0.2708597  | -0.0184835 | 0.80280385 |
| -0.0845369 | 0.25258958 | -0.0819523 | 0.26743753 | 0.3184466  | 9.98E-06   |
| 0.05634143 | 0.44621662 | -0.0607994 | 0.41100998 | 0.1520777  | 0.03878168 |
| 0.00573545 | 0.93823973 | -0.0667727 | 0.36649447 | 0.191669   | 0.00895971 |
| 0.35158274 | 9.24E-07   | 0.28648843 | 7.70E-05   | -0.157045  | 0.0327749  |
| -0.0670738 | 0.3643326  | -0.1482236 | 0.04405885 | 0.13263407 | 0.0719     |
| 0.14626318 | 0.04696594 | 0.1458898  | 0.04753739 | -0.2964496 | 4.18E-05   |
| -0.1199881 | 0.10377192 | -0.1144478 | 0.12085168 | 0.04137751 | 0.57601158 |
| -0.3426847 | 1.80E-06   | -0.1958757 | 0.00753838 | -0.0543792 | 0.46223688 |
| 0.14603095 | 0.04732068 | 0.09401155 | 0.20307146 | 0.25406325 | 0.00048365 |
| 0.05903414 | 0.42475139 | -0.0418132 | 0.5719967  | 0.22870418 | 0.00174072 |
| -0.3638606 | 3.56E-07   | -0.300339  | 3.27E-05   | 0.29839113 | 3.70E-05   |

|            |            |            |            |            |            |
|------------|------------|------------|------------|------------|------------|
| -0.1265821 | 0.08598895 | -0.0888541 | 0.22907891 | 0.10487418 | 0.15540529 |
| -0.0376999 | 0.61041557 | -0.1092943 | 0.138626   | 0.16944723 | 0.02112125 |
| -0.0527998 | 0.47535993 | -0.1590836 | 0.03054898 | -0.0102395 | 0.889978   |
| -0.2017061 | 0.00590048 | -0.1427811 | 0.05252378 | -0.4382398 | 4.41E-10   |
| 0.12118282 | 0.10035105 | 0.00163443 | 0.9823842  | 0.13518447 | 0.0665537  |
| -0.2764309 | 0.0001396  | -0.0887669 | 0.22953783 | -0.3244008 | 6.64E-06   |
| -0.0901678 | 0.22224118 | -0.2466305 | 0.00071378 | 0.20278949 | 0.00563385 |
| 0.13682832 | 0.06328316 | -0.024657  | 0.73902152 | 0.03454938 | 0.64058805 |
| 0.24653556 | 0.00071728 | 0.28836327 | 6.88E-05   | -0.1861924 | 0.011163   |
| -0.0739242 | 0.3172952  | -0.0316443 | 0.66894363 | -0.3024747 | 2.86E-05   |
| 0.03250899 | 0.66045196 | -0.087458  | 0.23650612 | 0.10225451 | 0.16604693 |
| -0.0915841 | 0.21503345 | -0.1320336 | 0.07320823 | 0.11170734 | 0.13006948 |
| -0.3907363 | 3.83E-08   | -0.309526  | 1.81E-05   | 0.52743209 | 1.22E-14   |
| 0.00933679 | 0.89962421 | -0.0509613 | 0.49088722 | 0.23898616 | 0.00105238 |
| -0.5681253 | 3.34E-17   | -0.4315011 | 8.67E-10   | 0.31146912 | 1.59E-05   |
| -0.0839916 | 0.25567351 | -0.1153613 | 0.11789439 | -0.1561459 | 0.0337995  |
| 0.10014467 | 0.17500543 | -0.147423  | 0.04522739 | -0.4027638 | 1.32E-08   |
| -0.3820091 | 8.07E-08   | -0.328412  | 5.02E-06   | 0.36482471 | 3.30E-07   |
| 0.15676378 | 0.03309251 | 0.00912576 | 0.90188138 | 0.19425834 | 0.00805921 |
| -0.3191043 | 9.55E-06   | -0.2413802 | 0.00093311 | 0.526721   | 1.35E-14   |
| 0.2382389  | 0.00109238 | 0.08816961 | 0.23269949 | 0.25759405 | 0.00040037 |
| -0.2205133 | 0.0025597  | -0.2332972 | 0.00139398 | 0.05108966 | 0.48979443 |
| -0.0394375 | 0.59404786 | -0.0725687 | 0.32627425 | -0.1805185 | 0.01393592 |
| 0.63674943 | 2.00E-22   | 0.36563548 | 3.09E-07   | -0.1823812 | 0.01296553 |
| -0.1312421 | 0.07496204 | -0.1674363 | 0.02272359 | 0.34687875 | 1.32E-06   |
| -0.0750314 | 0.31008135 | -0.1163909 | 0.11462902 | 0.24200598 | 0.00090405 |
| 0.44614449 | 1.96E-10   | 0.26014404 | 0.00034872 | 0.24996283 | 0.00060035 |
| -0.4008414 | 1.57E-08   | -0.2547376 | 0.00046661 | 0.00188567 | 0.97967688 |
| -0.0909709 | 0.21813332 | 0.01107898 | 0.88102206 | 0.02023138 | 0.78459234 |
| 0.37838266 | 1.09E-07   | 0.13965991 | 0.05795902 | -0.3259394 | 5.97E-06   |
| -0.1261315 | 0.08712082 | -0.2176388 | 0.00292131 | 0.1684394  | 0.02191166 |
| 0.09912001 | 0.17948314 | 0.12183685 | 0.09851644 | -0.0614854 | 0.40574147 |
| -0.2329182 | 0.00141999 | -0.1139834 | 0.12237705 | -0.1892096 | 0.00989639 |
| 0.04064485 | 0.58279284 | -0.0729758 | 0.32356079 | 0.2722186  | 0.00017788 |
| 0.44874354 | 1.49E-10   | 0.29853368 | 3.67E-05   | -0.2340093 | 0.00134627 |
| 0.02970134 | 0.6881755  | 0.02048513 | 0.78195788 | 0.03567176 | 0.62976808 |
| -0.3975753 | 2.10E-08   | -0.3467514 | 1.33E-06   | 0.44144247 | 3.18E-10   |
| -0.3088188 | 1.89E-05   | -0.1287247 | 0.08076748 | -0.150242  | 0.04122468 |
| -0.050435  | 0.49538117 | -0.270901  | 0.00019174 | 0.25146515 | 0.00055487 |
| 0.02738105 | 0.71140657 | -0.140985  | 0.05559733 | 0.27449265 | 0.00015615 |
| 0.11969286 | 0.10463134 | 0.03584767 | 0.62807927 | -0.0780463 | 0.29098574 |
| -0.0778988 | 0.29190151 | -0.1670779 | 0.0230199  | 0.18239933 | 0.01295638 |
| -0.3250037 | 6.37E-06   | -0.3088148 | 1.90E-05   | 0.42749542 | 1.29E-09   |
| -0.3024125 | 2.87E-05   | -0.2716196 | 0.00018406 | 0.49022922 | 1.41E-12   |
| -0.1132871 | 0.12469179 | -0.1866651 | 0.01095558 | 0.11278347 | 0.12638728 |
| 0.19348213 | 0.00832032 | 0.06096437 | 0.40973958 | 0.27747616 | 0.00013138 |

|            |            |            |            |            |            |
|------------|------------|------------|------------|------------|------------|
| 0.14519937 | 0.04860933 | 0.01695829 | 0.81878276 | 0.08818326 | 0.2326269  |
| -0.026498  | 0.72031993 | -0.1645177 | 0.02523501 | 0.34770698 | 1.24E-06   |
| 0.04250675 | 0.56563265 | -0.0492602 | 0.5054912  | 0.26230242 | 0.0003099  |
| 0.29942275 | 3.47E-05   | 0.08882634 | 0.22922473 | -0.3299951 | 4.49E-06   |
| -0.251303  | 0.00055962 | -0.0845432 | 0.25255391 | -0.3108703 | 1.66E-05   |
| 0.06158811 | 0.40495639 | 0.05190594 | 0.48287557 | 0.20466838 | 0.00519692 |
| -0.0744021 | 0.31416777 | 0.12014281 | 0.10332384 | -0.0839621 | 0.25584159 |
| -0.0214624 | 0.77183512 | -0.0663933 | 0.36922983 | -0.5149847 | 6.40E-14   |
| 0.0392901  | 0.59542844 | 0.08163844 | 0.26928017 | 0.0230655  | 0.75531423 |
| -0.276415  | 0.00013973 | -0.2976015 | 3.89E-05   | 0.17838837 | 0.0151231  |
| 0.15790666 | 0.03181781 | 0.07472082 | 0.31209377 | -0.2889031 | 6.66E-05   |
| -0.2483775 | 0.00065206 | -0.2824368 | 9.81E-05   | 0.44891007 | 1.47E-10   |
| -0.1571458 | 0.03266166 | -0.0820179 | 0.2670534  | -0.2529807 | 0.00051224 |
| 0.00190226 | 0.97949809 | -0.0159701 | 0.82917659 | 0.05726604 | 0.43877781 |
| 0.18133134 | 0.01350492 | 0.14217379 | 0.05354693 | 0.27933035 | 0.00011789 |
| 0.09169889 | 0.21445676 | 0.01143629 | 0.87721464 | 0.39076054 | 3.82E-08   |
| -0.0004629 | 0.99501062 | -0.0461085 | 0.53313687 | -0.1376563 | 0.0616865  |
| 0.19695825 | 0.00720672 | -0.0364769 | 0.62205446 | -0.2781423 | 0.00012637 |
| 0.21759632 | 0.00292698 | -0.0319394 | 0.666041   | 0.19247489 | 0.00867033 |
| -0.1260908 | 0.08722359 | 0.01236795 | 0.86730045 | -0.1286423 | 0.08096345 |
| -0.0286244 | 0.69892313 | -0.0839628 | 0.25583726 | -0.121722  | 0.09883655 |
| -0.0082521 | 0.91123456 | 0.04678876 | 0.52710656 | -0.1182069 | 0.10904191 |
| 0.07893254 | 0.28552537 | -0.006799  | 0.92681659 | 0.16051176 | 0.02906748 |
| 0.06743955 | 0.3617167  | -0.0402893 | 0.58609733 | 0.15980117 | 0.02979677 |
| -0.0739097 | 0.31739016 | -0.124065  | 0.09246493 | 0.24869404 | 0.00064142 |
| 0.57330033 | 1.48E-17   | 0.28880476 | 6.70E-05   | -0.2931304 | 5.14E-05   |
| 0.2256696  | 0.00201118 | 0.08714236 | 0.23820875 | 0.30696159 | 2.14E-05   |
| -0.1456178 | 0.04795737 | -0.162561  | 0.02704907 | 0.23275094 | 0.00143162 |
| -0.009054  | 0.90264925 | -0.1030424 | 0.16279071 | 0.27827971 | 0.00012536 |
| 0.18882983 | 0.0100485  | 0.34266285 | 1.80E-06   | -0.3683008 | 2.50E-07   |
| -0.0215273 | 0.7711647  | -0.0584445 | 0.42940013 | 0.18649776 | 0.01102861 |
| 0.06689285 | 0.36563062 | 0.04211486 | 0.56922441 | -0.3243374 | 6.67E-06   |
| 0.27878109 | 0.00012174 | 0.09280886 | 0.20893666 | -0.2679264 | 0.00022679 |
| 0.15007938 | 0.04144725 | -0.0045803 | 0.95066059 | 0.17671797 | 0.01611493 |
| 0.2009326  | 0.00609768 | 0.15477961 | 0.03540851 | -0.240942  | 0.00095397 |
| 0.06425028 | 0.38491646 | -0.0031843 | 0.96568795 | 0.2122372  | 0.00372821 |
| -0.0441664 | 0.55054216 | -0.1201673 | 0.10325312 | 0.25451663 | 0.00047213 |
| 0.32993381 | 4.51E-06   | 0.16164243 | 0.02793848 | -0.289344  | 6.48E-05   |
| 0.15299652 | 0.03760543 | 0.02965746 | 0.68861219 | 0.26005166 | 0.00035048 |
| 0.346525   | 1.35E-06   | 0.02267004 | 0.75937977 | 0.3076508  | 2.04E-05   |
| -0.398539  | 1.93E-08   | -0.282108  | 0.00010008 | -0.266495  | 0.00024571 |
| -0.0779268 | 0.29172758 | 0.04375505 | 0.55426412 | 0.20302255 | 0.00557792 |
| -0.1181306 | 0.10927252 | -0.1799734 | 0.01423168 | 0.24950761 | 0.0006148  |
| -0.1797441 | 0.01435773 | -0.0340972 | 0.64496897 | 0.16373366 | 0.02594895 |
| -0.388056  | 4.82E-08   | -0.3321012 | 3.87E-06   | 0.2231943  | 0.00225954 |
| -0.157169  | 0.03263571 | -0.2941854 | 4.81E-05   | 0.30754655 | 2.06E-05   |



|            |             |            |            |            |            |
|------------|-------------|------------|------------|------------|------------|
| -0.0582045 | 0.43130066  | -0.13294   | 0.07124081 | 0.11332169 | 0.12457608 |
| -0.1131975 | 0.12499216  | -0.106368  | 0.14957167 | 0.52301404 | 2.22E-14   |
| -0.190942  | 0.00922807  | -0.071996  | 0.33011676 | 0.32657943 | 5.71E-06   |
| -0.0300764 | 0.684444686 | -0.0867301 | 0.24044504 | 0.08365035 | 0.25761702 |
| 0.16551494 | 0.02435133  | 0.1723136  | 0.01900647 | -0.438843  | 4.15E-10   |
| -0.0882288 | 0.23238463  | -0.0754063 | 0.30766299 | -0.0879159 | 0.23405181 |
| -0.4636868 | 2.99E-11    | -0.3046048 | 2.49E-05   | 0.19847753 | 0.00676316 |
| -0.1016327 | 0.16865073  | -0.0937769 | 0.20420617 | 0.13724862 | 0.06246844 |
| -0.1572503 | 0.03254468  | -0.2512669 | 0.00056069 | 0.16621    | 0.02375128 |
| 0.00644868 | 0.93057777  | -0.1390454 | 0.05908186 | 0.21457476 | 0.00335713 |
| 0.68418053 | 7.01E-27    | 0.45789978 | 5.63E-11   | -0.2730583 | 0.00016955 |
| -0.0991701 | 0.17926229  | -0.1298776 | 0.07806527 | 0.20343269 | 0.00548071 |
| -0.38609   | 5.71E-08    | -0.2606736 | 0.0003388  | 0.10661961 | 0.14860541 |
| -0.1062131 | 0.1501687   | -0.0911051 | 0.21745214 | 0.05604724 | 0.4485984  |
| -0.3015021 | 3.04E-05    | -0.3839618 | 6.84E-08   | 0.14920059 | 0.04266728 |
| 0.02785153 | 0.70667371  | -0.0600063 | 0.41715087 | -0.0708158 | 0.33812607 |
| 0.0094201  | 0.89873333  | -0.0343334 | 0.64267924 | 0.39610288 | 2.39E-08   |
| -0.069011  | 0.35061196  | -0.0734982 | 0.32009965 | 0.16955612 | 0.02103734 |
| -0.1085708 | 0.14127324  | -0.0219525 | 0.7667734  | -0.2102385 | 0.00407439 |
| 0.03944044 | 0.5940201   | -0.0690276 | 0.35049603 | 0.20666853 | 0.00476538 |
| -0.1696488 | 0.02096612  | -0.1260834 | 0.08724223 | -0.2989429 | 3.57E-05   |
| -0.2577057 | 0.00039797  | -0.2950303 | 4.57E-05   | 0.08932423 | 0.22661493 |
| -0.310248  | 1.73E-05    | -0.2116789 | 0.00382213 | -0.2138268 | 0.00347206 |
| -0.2413703 | 0.00093358  | -0.1638331 | 0.02585748 | -0.1620422 | 0.02754842 |
| -0.0230116 | 0.75586786  | -0.1618218 | 0.02776289 | 0.27858037 | 0.00012318 |
| -0.0909845 | 0.21806428  | 0.22437879 | 0.00213741 | -0.4518663 | 1.07E-10   |
| 0.13213005 | 0.07299678  | 0.03050109 | 0.68023409 | 0.30919742 | 1.85E-05   |
| 0.00507562 | 0.94533311  | -0.0820505 | 0.26686256 | 0.21231902 | 0.00371462 |
| 0.13660615 | 0.06371733  | 0.07550372 | 0.30703659 | -0.377059  | 1.22E-07   |
| 0.17362987 | 0.01809852  | 0.03814447 | 0.60620925 | -0.2147736 | 0.00332716 |
| -0.2528696 | 0.00051525  | -0.1993764 | 0.00651234 | 0.16696363 | 0.02311507 |
| -0.1668122 | 0.02324173  | -0.2870386 | 7.45E-05   | 0.20851534 | 0.00439578 |
| 0.11564953 | 0.11697297  | 0.09015842 | 0.22228951 | -0.20179   | 0.00587943 |
| -0.2725477 | 0.00017457  | -0.1911022 | 0.00916834 | 0.20607283 | 0.00489041 |
| 0.20397155 | 0.00535529  | 0.08695237 | 0.2392376  | -0.3080182 | 2.00E-05   |
| 0.42198066 | 2.20E-09    | 0.27161679 | 0.00018409 | -0.2584686 | 0.00038191 |
| 0.06436705 | 0.3840514   | 0.25935395 | 0.00036402 | -0.1719085 | 0.01929376 |
| -0.0068097 | 0.92670175  | 0.00713789 | 0.92317987 | -0.2794621 | 0.00011698 |
| -0.1713575 | 0.01969052  | -0.2262034 | 0.001961   | -0.4021427 | 1.39E-08   |
| -0.1852886 | 0.01156919  | -0.1729207 | 0.01858289 | 0.34305121 | 1.75E-06   |
| -0.2893588 | 6.47E-05    | -0.2828434 | 9.58E-05   | 0.2539726  | 0.00048599 |
| -0.0368544 | 0.61845214  | -0.0772594 | 0.29589282 | -0.36719   | 2.73E-07   |
| 0.07788058 | 0.29201475  | -0.0091203 | 0.90193946 | -0.3904558 | 3.92E-08   |
| -0.3172957 | 1.08E-05    | -0.2141982 | 0.00341455 | -0.2026333 | 0.00567161 |
| 0.40950766 | 7.12E-09    | 0.07721646 | 0.29616183 | -0.1842215 | 0.01206553 |
| 0.06867602 | 0.35296114  | -0.0070785 | 0.9238176  | -0.4182986 | 3.13E-09   |

|            |            |            |            |            |            |
|------------|------------|------------|------------|------------|------------|
| -0.1427853 | 0.05251685 | -0.162301  | 0.02729833 | 0.2139415  | 0.00345421 |
| -0.1195954 | 0.10491634 | -0.0888729 | 0.22898002 | 0.17882144 | 0.01487483 |
| 0.02638941 | 0.7214182  | -0.0693507 | 0.34824028 | 0.26129873 | 0.00032742 |
| 0.13538293 | 0.06615165 | -0.0193687 | 0.79356662 | -0.1834305 | 0.01244539 |
| 0.59729235 | 2.86E-19   | 0.49247489 | 1.08E-12   | -0.0948309 | 0.19914431 |
| -0.1342727 | 0.06842635 | -0.0280807 | 0.70437264 | -0.3634564 | 3.68E-07   |
| 0.03685517 | 0.6184445  | 0.03519112 | 0.63439212 | -0.4419089 | 3.03E-10   |
| 0.19427785 | 0.00805274 | -0.0012548 | 0.98647542 | -0.198212  | 0.00683887 |
| 0.18191945 | 0.01320039 | 0.21112228 | 0.00391789 | -0.2305931 | 0.00158957 |
| -0.419177  | 2.88E-09   | -0.2229991 | 0.00228026 | 0.11233193 | 0.1279224  |
| 0.0659429  | 0.37249351 | 0.16575982 | 0.02413846 | 0.28237847 | 9.85E-05   |
| 0.27069429 | 0.000194   | 0.07552208 | 0.30691863 | 0.12605769 | 0.08730731 |
| 0.07714691 | 0.2965984  | 0.00069462 | 0.9925129  | 0.22767864 | 0.00182817 |
| -0.2805061 | 0.00011002 | -0.223565  | 0.00222066 | 0.11726329 | 0.11191778 |
| -0.005269  | 0.94325419 | -0.0762131 | 0.3025008  | 0.22377442 | 0.00219895 |
| 0.06505504 | 0.37897893 | -0.0005664 | 0.99389469 | 0.16646659 | 0.02353299 |
| -0.2161379 | 0.00312794 | 0.01111815 | 0.88060455 | 0.03588491 | 0.62772201 |
| -0.0426788 | 0.56405912 | -0.1463373 | 0.04685321 | 0.18414009 | 0.01210414 |
| -0.0489321 | 0.50833386 | -0.1769638 | 0.0159655  | 0.23667398 | 0.0011807  |
| -0.1851514 | 0.01163198 | -0.2942303 | 4.80E-05   | 0.45375705 | 8.78E-11   |
| -0.259067  | 0.00036973 | -0.2504278 | 0.00058592 | -0.3902876 | 3.98E-08   |
| -0.3417716 | 1.92E-06   | -0.0642755 | 0.38472957 | -0.2644313 | 0.00027558 |
| 0.11446483 | 0.12079598 | 0.08339987 | 0.25904981 | -0.2076358 | 0.00456846 |
| 0.20818536 | 0.00445987 | 0.02497654 | 0.7357643  | 0.216867   | 0.00302597 |
| 0.52627905 | 1.43E-14   | 0.14893134 | 0.04304705 | -0.3589429 | 5.24E-07   |
| -0.1823322 | 0.01299027 | -0.2729237 | 0.00017086 | 0.24319882 | 0.00085095 |
| 0.10829259 | 0.14230162 | -0.0960726 | 0.19329848 | 0.20132909 | 0.00599587 |
| -0.0986803 | 0.18143037 | -0.1198947 | 0.10404313 | -0.3641537 | 3.48E-07   |
| 0.37928417 | 1.01E-07   | 0.27220411 | 0.00017803 | -0.1797825 | 0.01433654 |
| -0.0373074 | 0.61414098 | -0.084878  | 0.25067361 | 0.20519254 | 0.00508057 |
| -0.2892925 | 6.50E-05   | -0.2504381 | 0.00058561 | -0.1045388 | 0.15673834 |
| 0.40081072 | 1.57E-08   | 0.20832084 | 0.00443346 | -0.1359078 | 0.06509802 |
| 0.22521642 | 0.00205471 | 0.28056907 | 0.00010961 | -0.0047898 | 0.94840681 |
| 0.22818944 | 0.00178413 | 0.10637718 | 0.14953616 | -0.4914763 | 1.22E-12   |
| 0.22754405 | 0.00183994 | 0.0065805  | 0.92916237 | -0.1592518 | 0.03037125 |
| -0.1300147 | 0.07774883 | -0.1493534 | 0.04245295 | 0.20659873 | 0.00477988 |
| -0.0609035 | 0.4102079  | 0.24997897 | 0.00059985 | 0.1807696  | 0.01380152 |
| -0.2243444 | 0.00214087 | -0.3687198 | 2.41E-07   | 0.2013935  | 0.00597947 |
| 0.19372497 | 0.00823783 | 0.22941962 | 0.00168199 | 0.24738083 | 0.00068664 |
| 0.33066439 | 4.29E-06   | 0.15254993 | 0.03817333 | -0.1914365 | 0.00904478 |
| -0.015787  | 0.83110501 | -0.0816058 | 0.26947249 | 0.18272459 | 0.01279325 |
| -0.2705319 | 0.00019579 | -0.2775362 | 0.00013092 | 0.1085556  | 0.1413294  |
| 0.30953061 | 1.81E-05   | 0.25694586 | 0.00041459 | 0.28759353 | 7.21E-05   |
| -0.0750774 | 0.30978364 | 0.29874762 | 3.62E-05   | -0.373606  | 1.62E-07   |
| -0.155019  | 0.03512197 | -0.2336512 | 0.00137007 | 0.13963661 | 0.05800127 |
| -0.149355  | 0.04245082 | -0.277122  | 0.00013411 | 0.39120437 | 3.67E-08   |

|            |            |            |            |            |            |
|------------|------------|------------|------------|------------|------------|
| -0.0654881 | 0.37580682 | -0.291088  | 5.83E-05   | 0.24210762 | 0.00089941 |
| -0.2126883 | 0.00365384 | 0.00844802 | 0.90913577 | -0.1101598 | 0.13550863 |
| 0.02317622 | 0.75417719 | -0.0834666 | 0.25866773 | 0.16912204 | 0.02137355 |
| -0.1643997 | 0.0253414  | -0.1584452 | 0.03123174 | -0.0445306 | 0.54725733 |
| 0.00937009 | 0.89926806 | -0.0653636 | 0.37671743 | -0.3559071 | 6.63E-07   |
| -0.31807   | 1.02E-05   | -0.1940319 | 0.00813461 | 0.31303655 | 1.43E-05   |
| -0.1282448 | 0.08191406 | -0.1982342 | 0.00683253 | 0.13719528 | 0.06257135 |
| 0.06924518 | 0.34897598 | 0.29348894 | 5.02E-05   | 0.05754936 | 0.43651264 |
| 0.20275646 | 0.00564182 | 0.13399202 | 0.06901151 | -0.1945699 | 0.00795645 |
| -0.1160589 | 0.11567407 | -0.2320091 | 0.00148422 | -0.0160728 | 0.82809421 |
| -0.0410474 | 0.57906203 | -0.022957  | 0.75642943 | -0.1107795 | 0.13331022 |
| 0.62069058 | 4.36E-21   | 0.33466279 | 3.22E-06   | -0.3165471 | 1.13E-05   |
| -0.1608239 | 0.028752   | -0.2358627 | 0.00122901 | 0.4080036  | 8.18E-09   |
| -0.101569  | 0.16891951 | 0.05652739 | 0.4447148  | -0.4382119 | 4.42E-10   |
| -0.1548411 | 0.03533472 | -0.0459067 | 0.53493246 | -0.3686154 | 2.43E-07   |
| 0.22739516 | 0.00185304 | 0.07969961 | 0.28085488 | -0.1994921 | 0.00648067 |
| -0.3057534 | 2.31E-05   | -0.228286  | 0.00177591 | 0.06314701 | 0.39314745 |
| -0.2592405 | 0.00036627 | -0.2167656 | 0.00303997 | 0.08439363 | 0.25339747 |
| -0.0036062 | 0.96114475 | -0.0429133 | 0.5619183  | -0.0984928 | 0.18226516 |
| 0.60484074 | 7.69E-20   | 0.32488517 | 6.42E-06   | -0.2556498 | 0.00044443 |
| 0.1870972  | 0.01076895 | 0.00571217 | 0.93848993 | 0.08371083 | 0.25727191 |
| 0.0002358  | 0.99745836 | -0.0304037 | 0.68119898 | 0.12910818 | 0.07986038 |
| 0.05973023 | 0.41930133 | -0.1380755 | 0.06089071 | 0.0644686  | 0.38330013 |
| -0.2700739 | 0.00020094 | -0.2874125 | 7.29E-05   | 0.0265708  | 0.71958326 |
| 0.52656852 | 1.38E-14   | 0.32302658 | 7.30E-06   | -0.2643598 | 0.00027667 |
| -0.1732418 | 0.01836222 | -0.0946403 | 0.20005302 | -0.0473034 | 0.52256709 |
| -0.0119436 | 0.87181381 | 0.06288311 | 0.39513186 | -0.1478537 | 0.04459546 |
| -0.1683159 | 0.02201026 | -0.2189934 | 0.0027455  | 0.15805234 | 0.03165837 |
| -0.1166901 | 0.11369349 | -0.0369649 | 0.61739898 | -0.0625577 | 0.39758705 |
| 0.18796695 | 0.0104018  | 0.0323285  | 0.66222085 | 0.22205015 | 0.00238349 |
| -0.056139  | 0.447855   | -0.1315238 | 0.07433398 | 0.23978304 | 0.00101121 |
| -0.024907  | 0.73647254 | -0.0828955 | 0.2619517  | 0.27739182 | 0.00013202 |
| 0.41977189 | 2.72E-09   | 0.20220855 | 0.00577545 | -0.3461328 | 1.39E-06   |
| 0.00908686 | 0.90229755 | 0.08586287 | 0.24519765 | -0.3808048 | 8.93E-08   |
| -0.2880038 | 7.03E-05   | -0.0958668 | 0.19425859 | -0.2483985 | 0.00065135 |
| -0.0398487 | 0.59020314 | 0.12507318 | 0.08982598 | -0.1944163 | 0.00800697 |
| -0.0282179 | 0.70299597 | -0.119321  | 0.10572179 | -0.3517302 | 9.14E-07   |
| -0.015203  | 0.83726469 | -0.0296577 | 0.68860931 | -0.0888028 | 0.22934844 |
| -0.011266  | 0.87902891 | -0.046207  | 0.53226152 | -0.1853151 | 0.01155712 |
| 0.09059467 | 0.22005104 | -0.044041  | 0.55167546 | 0.18269203 | 0.0128095  |
| -0.0495917 | 0.50262812 | -0.0658718 | 0.37301032 | 0.24997371 | 0.00060001 |
| -0.0210187 | 0.77642689 | -0.1043167 | 0.15762582 | 0.1826147  | 0.01284816 |
| -0.0633803 | 0.39139797 | 0.01350611 | 0.85521693 | 0.27848872 | 0.00012384 |
| 0.21480295 | 0.00332275 | 0.38903073 | 4.43E-08   | -0.2091903 | 0.00426728 |
| -0.2367869 | 0.00117411 | 0.00083372 | 0.99101366 | -0.3902302 | 4.00E-08   |
| -0.4315646 | 8.62E-10   | -0.303415  | 2.69E-05   | 0.26253085 | 0.00030604 |

|            |            |            |            |            |            |
|------------|------------|------------|------------|------------|------------|
| -0.0651479 | 0.37829726 | -0.1353916 | 0.06613405 | 0.15247102 | 0.03827442 |
| -0.0309035 | 0.67625116 | 0.01774474 | 0.81053367 | -0.2712862 | 0.00018759 |
| -0.2646589 | 0.00027213 | -0.0681058 | 0.35698207 | -0.4239298 | 1.82E-09   |
| 0.02657274 | 0.7195636  | -0.1385532 | 0.05999426 | -0.0987078 | 0.18130811 |
| 0.17370949 | 0.01804484 | 0.16407278 | 0.02563805 | 0.30708441 | 2.12E-05   |
| -0.2876292 | 7.19E-05   | -0.2434778 | 0.00083896 | 0.33979511 | 2.22E-06   |
| -0.0740546 | 0.31643957 | -0.1183278 | 0.1086778  | 0.22000648 | 0.00262035 |
| -0.0378352 | 0.60913475 | -0.1185846 | 0.10790731 | 0.11140143 | 0.13113116 |
| -0.0072542 | 0.92193212 | -0.0081252 | 0.91259425 | 0.25149198 | 0.00055409 |
| 0.04812068 | 0.51539975 | 0.01389077 | 0.85114059 | 0.17532676 | 0.01698379 |
| -0.1956427 | 0.00761153 | 0.05891168 | 0.42571439 | 0.22661421 | 0.00192315 |
| 0.14707925 | 0.04573691 | -0.0804288 | 0.2764629  | 0.22616749 | 0.00196434 |
| -0.3664705 | 2.89E-07   | -0.3156697 | 1.20E-05   | 0.17755862 | 0.01560891 |
| -0.0584618 | 0.429263   | 0.01567312 | 0.83230547 | 0.49049384 | 1.37E-12   |
| -0.0392764 | 0.59555696 | -0.1257293 | 0.088141   | 0.22862299 | 0.0017475  |
| -0.0433658 | 0.55779708 | -0.1320012 | 0.07327933 | 0.28878041 | 6.71E-05   |
| -0.2123328 | 0.00371233 | -0.1982484 | 0.00682845 | 0.23960858 | 0.00102009 |
| -0.3423719 | 1.84E-06   | -0.39209   | 3.40E-08   | 0.36765588 | 2.63E-07   |
| -0.0441459 | 0.55072789 | -0.025883  | 0.72654931 | 0.20983009 | 0.00414859 |
| -0.2782394 | 0.00012566 | -0.26289   | 0.00030005 | 0.1037601  | 0.15986637 |
| 0.42621076 | 1.46E-09   | 0.04326759 | 0.55869023 | 0.31488213 | 1.27E-05   |
| 0.10416188 | 0.15824658 | -0.1016558 | 0.16855347 | -0.0091184 | 0.90195982 |
| 0.02551628 | 0.73027271 | 0.0240283  | 0.7454445  | -0.2405619 | 0.0009724  |
| -0.0505456 | 0.49443484 | -0.0959026 | 0.19409144 | 0.18778761 | 0.01047659 |
| -0.1592992 | 0.03032135 | -0.1797055 | 0.01437904 | 0.35305071 | 8.26E-07   |
| -0.0541826 | 0.46385992 | -0.1515504 | 0.03947058 | -0.2391807 | 0.00104219 |
| 0.1180728  | 0.10944716 | 0.06505057 | 0.37901174 | -0.4340851 | 6.70E-10   |
| 0.08288118 | 0.26203425 | 0.02534495 | 0.73201449 | 0.08506129 | 0.24964806 |
| 0.0576878  | 0.43540818 | 0.08455475 | 0.25248909 | -0.2648719 | 0.00026893 |
| 0.42086766 | 2.45E-09   | 0.24805047 | 0.00066323 | -0.2606598 | 0.00033905 |
| -0.2188059 | 0.00276926 | -0.1829379 | 0.01268723 | 0.07244002 | 0.32713514 |
| -0.1338911 | 0.06922294 | -0.1684122 | 0.02193331 | 0.10568565 | 0.15221535 |
| 0.31380037 | 1.36E-05   | 0.25424139 | 0.0004791  | -0.1585103 | 0.03116152 |
| 0.24654958 | 0.00071676 | 0.10258645 | 0.16466919 | -0.1925331 | 0.00864974 |
| -0.2425578 | 0.00087912 | -0.1895618 | 0.00975716 | -0.2455095 | 0.00075617 |
| -0.3104739 | 1.70E-05   | -0.1868989 | 0.01085425 | -0.2326178 | 0.00144093 |
| -0.2022374 | 0.00576835 | -0.2436655 | 0.00083097 | 0.17472457 | 0.01737235 |
| -0.2618124 | 0.00031834 | -0.139611  | 0.05804773 | -0.1303238 | 0.07703923 |
| 0.05187892 | 0.48310375 | 0.05198446 | 0.48221273 | -0.5627653 | 7.61E-17   |
| 0.14159902 | 0.05453036 | 0.02890468 | 0.69612025 | 0.35151006 | 9.29E-07   |
| -0.2977282 | 3.86E-05   | -0.2993678 | 3.48E-05   | 0.25367268 | 0.00049379 |
| -0.1010812 | 0.17098564 | -0.1473809 | 0.04528952 | 0.09739364 | 0.18721736 |
| 0.12586192 | 0.0878036  | 0.00680111 | 0.926794   | 0.10483096 | 0.15557658 |
| -0.1358326 | 0.06524806 | -0.0966482 | 0.19063142 | 0.20079205 | 0.00613413 |
| -0.2224249 | 0.00234223 | -0.2350961 | 0.00127633 | -0.2384161 | 0.00108277 |
| -0.015652  | 0.8325278  | -0.1567576 | 0.03309947 | 0.36161847 | 4.25E-07   |

|            |            |            |            |            |            |
|------------|------------|------------|------------|------------|------------|
| -0.0444212 | 0.54824309 | -0.0873327 | 0.23718103 | 0.18416798 | 0.0120909  |
| -0.040202  | 0.58690934 | -0.0131753 | 0.85872578 | -0.2693011 | 0.00020991 |
| -0.2197714 | 0.00264892 | -0.125761  | 0.0880604  | 0.01937561 | 0.7934948  |
| -0.0758951 | 0.30452905 | -0.0906676 | 0.21967849 | -0.3745022 | 1.51E-07   |
| -0.1745797 | 0.01746695 | -0.2781897 | 0.00012602 | 0.17018943 | 0.02055502 |
| -0.2670294 | 0.00023848 | -0.0683863 | 0.35500041 | -0.1352204 | 0.06648086 |
| 0.24401955 | 0.0008161  | 0.00426656 | 0.95403666 | 0.14675186 | 0.04622671 |
| -0.072152  | 0.32906708 | -0.0828439 | 0.26224978 | -0.2150399 | 0.00328739 |
| -0.329229  | 4.74E-06   | -0.2848657 | 8.49E-05   | 0.3793491  | 1.01E-07   |
| -0.1311622 | 0.07514086 | -0.0855581 | 0.24688307 | -0.2039665 | 0.00535646 |
| 0.16668898 | 0.02334521 | -0.0399987 | 0.58880403 | 0.20808242 | 0.00448003 |
| -0.0675237 | 0.36111642 | -0.1174015 | 0.11149289 | 0.15904916 | 0.03058552 |
| -0.1430976 | 0.05199714 | -0.2264343 | 0.00193964 | 0.19224239 | 0.00875295 |
| -0.188974  | 0.00999053 | -0.1565335 | 0.03335451 | 0.55905098 | 1.34E-16   |
| 0.25815846 | 0.00038836 | 0.0519625  | 0.48239807 | 0.03977386 | 0.59090226 |
| -0.0595096 | 0.4210246  | 0.01772495 | 0.81074106 | -0.2604788 | 0.00034242 |
| -0.2194336 | 0.00269047 | -0.2051943 | 0.00508019 | 0.16100087 | 0.02857441 |
| -0.1933274 | 0.00837326 | -0.2951456 | 4.53E-05   | -0.1715889 | 0.019523   |
| 0.06616328 | 0.37089439 | -0.0342735 | 0.64325984 | 0.12234246 | 0.09711645 |
| 0.56634571 | 4.40E-17   | 0.38582047 | 5.84E-08   | -0.3707168 | 2.05E-07   |
| -0.2237588 | 0.00220057 | -0.147929  | 0.04448585 | 0.24609761 | 0.00073365 |
| 0.03294073 | 0.65622837 | -0.0492981 | 0.5051639  | 0.0436173  | 0.55551317 |
| 0.20884735 | 0.00433214 | 0.04365972 | 0.55512837 | -0.054967  | 0.45740499 |
| -0.0490444 | 0.5073601  | -0.0278154 | 0.70703674 | 0.35145243 | 9.33E-07   |
| -0.2007057 | 0.00615663 | -0.094647  | 0.20002122 | -0.3073308 | 2.09E-05   |
| -0.1622354 | 0.0273615  | -0.0965711 | 0.19098728 | 0.01113409 | 0.88043472 |
| -0.237426  | 0.00113747 | -0.1146622 | 0.12015245 | -0.0115366 | 0.87614662 |
| 0.11402004 | 0.12225607 | 0.16485291 | 0.02493494 | -0.1330996 | 0.0708989  |
| -0.0514098 | 0.48707422 | 0.14726435 | 0.04546192 | -0.5320852 | 6.49E-15   |
| -0.1288632 | 0.08043881 | -0.0352673 | 0.63365803 | -0.1198476 | 0.10418011 |
| 0.25092132 | 0.00057096 | 0.13685354 | 0.06323403 | -0.2934411 | 5.04E-05   |
| 0.2038268  | 0.00538873 | -0.0213149 | 0.7733603  | 0.10391693 | 0.15923266 |
| 0.17255698 | 0.01883567 | 0.03085311 | 0.67674966 | 0.11450833 | 0.12065388 |
| 0.14920174 | 0.04266566 | -0.0833033 | 0.25960384 | 0.23807516 | 0.00110133 |
| 0.00333809 | 0.96403135 | -0.0310185 | 0.67511523 | 0.22682822 | 0.0019037  |
| 0.06400571 | 0.38673196 | 0.02024742 | 0.78442573 | 0.52147329 | 2.73E-14   |
| 0.30256023 | 2.84E-05   | -0.0565354 | 0.44465044 | 0.05842118 | 0.42958436 |
| 0.65760319 | 2.76E-24   | 0.37069028 | 2.06E-07   | -0.2812418 | 0.00010534 |
| 0.01676072 | 0.82085825 | 0.00856032 | 0.90793315 | -0.1995033 | 0.00647762 |
| -0.3438729 | 1.65E-06   | -0.292347  | 5.39E-05   | 0.01024653 | 0.88990305 |
| -0.2343167 | 0.00132614 | -0.0379398 | 0.60814452 | 0.0676397  | 0.36029037 |
| -0.1849425 | 0.01172819 | -0.1715634 | 0.01954143 | -0.3109061 | 1.65E-05   |
| 0.38314356 | 7.33E-08   | 0.54375575 | 1.26E-15   | -0.2457292 | 0.00074768 |
| -0.0707829 | 0.33835163 | -0.0344216 | 0.64182433 | -0.160701  | 0.02887588 |
| -0.1098086 | 0.136767   | -0.1494098 | 0.04237419 | 0.1003309  | 0.17420058 |
| 0.17385532 | 0.01794686 | 0.13777009 | 0.06146959 | 0.32211704 | 7.77E-06   |

|            |            |            |            |            |            |
|------------|------------|------------|------------|------------|------------|
| 0.03930061 | 0.59532994 | -0.0082463 | 0.91129651 | 0.13689218 | 0.06315881 |
| -0.1766491 | 0.01615701 | -0.0811567 | 0.27212541 | 0.37821723 | 1.11E-07   |
| 0.02882469 | 0.69691975 | 0.15839692 | 0.03128394 | 0.20915543 | 0.00427383 |
| -0.1240372 | 0.09253854 | -0.1746914 | 0.01739399 | 0.2901125  | 6.18E-05   |
| 0.12027766 | 0.10293451 | 0.03360317 | 0.64976907 | 0.11917842 | 0.10614213 |
| 0.50817778 | 1.54E-13   | 0.41046222 | 6.52E-09   | -0.1963587 | 0.00738877 |
| -0.3318163 | 3.95E-06   | -0.2122269 | 0.00372991 | 0.13926697 | 0.05867502 |
| -0.0362356 | 0.62436193 | -0.122075  | 0.09785515 | 0.18921977 | 0.00989236 |
| 0.15785492 | 0.03187461 | -0.0432301 | 0.55903124 | -0.2769863 | 0.00013517 |
| 0.02276088 | 0.75844532 | -0.0290757 | 0.69441154 | -0.1832302 | 0.01254325 |
| 0.00920264 | 0.90105905 | -0.0858645 | 0.24518881 | 0.25203424 | 0.00053849 |
| 0.07542623 | 0.30753473 | -0.0155035 | 0.83409361 | 0.01655851 | 0.82298381 |
| -0.0174385 | 0.81374319 | -0.0188995 | 0.79845911 | -0.2145769 | 0.00335681 |
| 0.0855663  | 0.24683772 | 0.03105245 | 0.67477955 | -0.2263065 | 0.00195144 |
| -0.0499184 | 0.49981407 | -0.077558  | 0.29402445 | -0.2888978 | 6.66E-05   |
| -0.1439358 | 0.05062324 | -0.1323151 | 0.07259257 | 0.40365415 | 1.22E-08   |
| 0.20741434 | 0.00461289 | -0.0026556 | 0.97138171 | 0.22525899 | 0.00205058 |
| -0.0124808 | 0.86610061 | -0.0146334 | 0.84328228 | 0.42329296 | 1.94E-09   |
| 0.16219329 | 0.02740215 | 0.01187608 | 0.8725321  | -0.0265342 | 0.71995302 |
| -0.1143561 | 0.12115172 | -0.0033624 | 0.96376923 | -0.1704642 | 0.02034878 |
| -0.3742861 | 1.53E-07   | -0.2578648 | 0.00039457 | -0.4841295 | 2.92E-12   |
| -0.1940998 | 0.00811193 | -0.1879771 | 0.0103976  | -0.0349546 | 0.63667257 |
| -0.1031302 | 0.16243064 | -0.148645  | 0.04345398 | 0.06253161 | 0.39778428 |
| -0.1100781 | 0.13580067 | -0.0126181 | 0.86464168 | -0.0204232 | 0.78260079 |
| -0.2827873 | 9.61E-05   | -0.1083975 | 0.1419133  | 0.05530239 | 0.45466044 |
| 0.15851128 | 0.03116051 | 0.12068271 | 0.10177201 | -0.0327323 | 0.65826637 |
| -0.044079  | 0.55133221 | -0.1433829 | 0.05152606 | 0.25947706 | 0.0003616  |
| -0.0723716 | 0.32759351 | -0.1560858 | 0.03386902 | 0.21256942 | 0.00367331 |
| -0.2133936 | 0.00354025 | -0.2309669 | 0.00156111 | 0.31076852 | 1.67E-05   |
| -0.0700543 | 0.34335989 | -0.1723007 | 0.01901555 | 0.07697517 | 0.29767821 |
| 0.05225103 | 0.47996639 | -0.0399139 | 0.58959525 | -0.1588781 | 0.03076736 |
| 0.11302141 | 0.1255841  | 0.04502617 | 0.54280291 | -0.4282264 | 1.20E-09   |
| -0.2734198 | 0.00016607 | -0.2600055 | 0.00035136 | 0.06131567 | 0.40704154 |
| 0.14092619 | 0.05570051 | -0.192627  | 0.00861667 | 0.2737402  | 0.00016305 |
| -0.0767628 | 0.29901719 | -0.1730989 | 0.01846017 | 0.24764727 | 0.00067723 |
| -0.2908651 | 5.91E-05   | -0.1660641 | 0.02387615 | -0.1582146 | 0.03148161 |
| -0.0329171 | 0.65645931 | -0.1708097 | 0.02009191 | -0.4941185 | 8.83E-13   |
| -0.3365364 | 2.82E-06   | -0.260141  | 0.00034878 | 0.14285808 | 0.05239531 |
| 0.00382002 | 0.9588427  | -0.1537622 | 0.03664834 | 0.15170989 | 0.03926117 |
| 0.39235617 | 3.32E-08   | 0.18446687 | 0.01194977 | -0.3820443 | 8.05E-08   |
| 0.06153141 | 0.4053898  | -0.0732974 | 0.3214272  | -0.0002059 | 0.99778101 |
| 0.48057146 | 4.42E-12   | 0.27694792 | 0.00013548 | -0.0021988 | 0.97630315 |
| 0.2461688  | 0.00073096 | 0.13495056 | 0.0670301  | -0.1664007 | 0.02358888 |
| -0.0560144 | 0.44886473 | 0.00246622 | 0.97342187 | -0.2861052 | 7.88E-05   |
| -0.2633706 | 0.00029221 | -0.2604212 | 0.00034349 | 0.01147077 | 0.87684738 |
| -0.2295494 | 0.00167154 | -0.2790637 | 0.00011974 | 0.14820819 | 0.04408109 |

|            |            |            |            |            |            |
|------------|------------|------------|------------|------------|------------|
| -0.345873  | 1.42E-06   | -0.1433599 | 0.05156393 | -0.380189  | 9.40E-08   |
| -0.4428593 | 2.75E-10   | -0.3306417 | 4.29E-06   | 0.01539034 | 0.83528771 |
| -0.1691838 | 0.02132547 | -0.1607772 | 0.02879903 | 0.3507862  | 9.81E-07   |
| 0.03237674 | 0.66174785 | 0.1212818  | 0.10007167 | -0.0430381 | 0.56077992 |
| -0.3581628 | 5.57E-07   | -0.2896493 | 6.36E-05   | -0.4578095 | 5.68E-11   |
| -0.2248519 | 0.00209033 | -0.1129146 | 0.12594417 | -0.1769905 | 0.01594935 |
| -0.1078613 | 0.14390703 | -0.1631477 | 0.02649374 | 0.01974358 | 0.78966349 |
| 0.2252517  | 0.00205129 | -0.1196361 | 0.10479722 | 0.03314495 | 0.65423436 |
| 0.37357103 | 1.63E-07   | 0.24922019 | 0.00062409 | -0.1720769 | 0.01917384 |
| -0.195912  | 0.00752704 | -0.2255872 | 0.00201904 | 0.12971832 | 0.07843416 |
| 0.02068517 | 0.77988288 | 0.08578967 | 0.24560172 | -0.106477  | 0.14915234 |
| -0.2622667 | 0.00031051 | -0.0940696 | 0.20279159 | -0.2389602 | 0.00105374 |
| 0.09871409 | 0.18128011 | -0.0296146 | 0.68903918 | 0.15744675 | 0.03232565 |
| -0.0256461 | 0.72895402 | -0.0789491 | 0.28542415 | -0.4732648 | 1.02E-11   |
| -0.1601343 | 0.02945297 | -0.2547101 | 0.00046729 | 0.14153941 | 0.05463321 |
| 0.04883098 | 0.50921191 | 0.12719717 | 0.08446308 | -0.0409255 | 0.58019097 |
| -0.0276647 | 0.70855172 | -0.1755204 | 0.01686044 | 0.10817671 | 0.14273159 |
| -0.1556725 | 0.03434988 | -0.1348206 | 0.067296   | -0.3498006 | 1.06E-06   |
| -0.0948881 | 0.19887242 | -0.1777292 | 0.01550793 | 0.21657679 | 0.0030662  |
| -0.1337285 | 0.06956443 | -0.1827404 | 0.01278536 | 0.19993158 | 0.00636161 |
| -0.183425  | 0.01244806 | -0.1461367 | 0.04715881 | 0.05412262 | 0.46435522 |
| -0.1838637 | 0.01223606 | -0.2458784 | 0.00074197 | 0.12373187 | 0.09335044 |
| -0.3168791 | 1.11E-05   | -0.3727264 | 1.74E-07   | 0.25922665 | 0.00036654 |
| -0.328832  | 4.88E-06   | -0.2887092 | 6.74E-05   | 0.2804227  | 0.00011056 |
| -0.1118504 | 0.1295752  | -0.1748632 | 0.0172822  | 0.17787122 | 0.01542431 |
| 0.40924088 | 7.30E-09   | 0.20129101 | 0.00600558 | -0.3301056 | 4.46E-06   |
| 0.08347013 | 0.25864739 | -0.2103927 | 0.00404669 | 0.23372579 | 0.00136508 |
| 0.41148142 | 5.93E-09   | 0.16201293 | 0.02757678 | 0.00413712 | 0.95542962 |
| -0.3567232 | 6.23E-07   | -0.2035446 | 0.00545444 | -0.0850327 | 0.2498079  |
| 0.00859765 | 0.90753349 | 0.14645364 | 0.04667667 | 0.18786582 | 0.01044391 |
| -0.0567252 | 0.4431204  | -0.021067  | 0.77592684 | -0.26536   | 0.00026174 |
| -0.0754422 | 0.30743181 | 0.12429692 | 0.09185253 | -0.2706138 | 0.00019489 |
| -0.2828973 | 9.55E-05   | -0.0546628 | 0.4599023  | -0.196654  | 0.00729858 |
| -0.1751239 | 0.0171138  | -0.0841359 | 0.25485494 | -0.2088729 | 0.00432727 |
| -0.1088898 | 0.14010145 | -0.1607398 | 0.02883673 | 0.18890335 | 0.0100189  |
| -0.0165097 | 0.82349725 | -0.0758283 | 0.30495573 | 0.09979455 | 0.17652606 |
| -0.1829184 | 0.01269693 | -0.0831988 | 0.26020406 | -0.1466996 | 0.04630524 |
| 0.01950444 | 0.79215289 | 0.00550572 | 0.94070892 | 0.48769515 | 1.91E-12   |
| -0.1580193 | 0.03169451 | -0.1808679 | 0.01374922 | 0.2056519  | 0.00498053 |
| -0.1332426 | 0.07059367 | -0.0385475 | 0.60240655 | -0.2413739 | 0.00093341 |
| 0.08154072 | 0.26985563 | 0.04844756 | 0.51254731 | 0.06509562 | 0.37868101 |
| 0.03937562 | 0.59462708 | -0.0173795 | 0.81436188 | 0.31896503 | 9.64E-06   |
| -0.0584663 | 0.42922765 | -0.1786485 | 0.01497355 | 0.0654811  | 0.37585818 |
| -0.0049995 | 0.94615183 | -0.151372  | 0.03970605 | 0.20365844 | 0.00542785 |
| -0.2353906 | 0.00125796 | -0.0292707 | 0.69246633 | -0.1312178 | 0.07501644 |
| -0.2706282 | 0.00019473 | -0.1601608 | 0.02942574 | 0.17082959 | 0.02007724 |

|            |            |            |            |            |            |
|------------|------------|------------|------------|------------|------------|
| -0.208275  | 0.00444238 | -0.0682261 | 0.3561313  | -0.1528536 | 0.03778636 |
| -0.1322246 | 0.07279006 | -0.2444306 | 0.00079915 | 0.14285258 | 0.05240447 |
| -0.209515  | 0.00420667 | -0.1947565 | 0.00789547 | 0.61370863 | 1.57E-20   |
| -0.0628866 | 0.39510561 | -0.0502936 | 0.4965928  | 0.22545538 | 0.00203165 |
| 0.02278093 | 0.75823915 | 0.07283477 | 0.32449895 | -0.1119646 | 0.12918191 |
| 0.00711979 | 0.92337409 | -0.1420643 | 0.05373319 | 0.23583957 | 0.00123042 |
| 0.05683637 | 0.44222583 | 0.07227595 | 0.32823487 | -0.1919256 | 0.00886664 |
| 0.23085594 | 0.00156951 | 0.07960411 | 0.28143351 | 0.2016989  | 0.00590228 |
| -0.0866184 | 0.24105389 | -0.1225796 | 0.09646516 | 0.03789314 | 0.60858586 |
| 0.37982112 | 9.70E-08   | 0.10428531 | 0.15775146 | -0.1477961 | 0.04467959 |
| -0.3515331 | 9.27E-07   | -0.1209039 | 0.10114159 | -0.4326135 | 7.76E-10   |
| -0.2929782 | 5.19E-05   | -0.2222765 | 0.00235848 | 0.16453605 | 0.0252185  |
| -0.1863279 | 0.01110319 | -0.1728376 | 0.0186404  | -0.0013977 | 0.98493482 |
| -0.2247771 | 0.00209771 | -0.1265711 | 0.0860164  | -0.3539546 | 7.71E-07   |
| -0.2321407 | 0.00147477 | -0.1434102 | 0.05148122 | -0.0237135 | 0.74866706 |
| -0.1291296 | 0.07980995 | -0.2620997 | 0.00031337 | 0.17146899 | 0.01960965 |
| -0.3895927 | 4.22E-08   | -0.2374364 | 0.00113688 | -0.4635583 | 3.03E-11   |
| 0.23357836 | 0.00137496 | 0.01015103 | 0.89092276 | 0.14565021 | 0.04790711 |
| 0.10363481 | 0.16037401 | 0.04284358 | 0.56255413 | -0.2631021 | 0.00029657 |
| 0.15376016 | 0.03665086 | -0.0316792 | 0.66859978 | 0.14967809 | 0.04200067 |
| 0.05293735 | 0.47420901 | 0.14713936 | 0.04564745 | 0.18648328 | 0.01103495 |
| -0.1797609 | 0.01434849 | 0.07199053 | 0.33015359 | -0.2002215 | 0.00628415 |
| -0.0282734 | 0.70243943 | -0.077987  | 0.29135411 | 0.20164177 | 0.00591666 |
| -0.0928217 | 0.20887331 | -0.2058268 | 0.00494291 | 0.11987633 | 0.10409664 |
| 0.05463547 | 0.46012693 | -0.0156901 | 0.83212627 | -0.2013127 | 0.00600005 |
| -0.2787645 | 0.00012186 | -0.1381206 | 0.06080565 | -0.2392616 | 0.00103798 |
| -0.1602937 | 0.02928961 | -0.2633421 | 0.00029267 | 0.11939388 | 0.10550731 |
| 0.41576051 | 3.97E-09   | 0.29868461 | 3.63E-05   | -0.3749278 | 1.46E-07   |
| -0.1381029 | 0.06083902 | -0.2514605 | 0.00055501 | 0.14722672 | 0.04551771 |
| -0.3064986 | 2.20E-05   | -0.3730044 | 1.70E-07   | 0.27437297 | 0.00015722 |
| -0.1412361 | 0.05515898 | -0.2075415 | 0.00458732 | 0.14250013 | 0.05299513 |
| 0.22447185 | 0.00212808 | 0.21064561 | 0.00400161 | -0.3216303 | 8.04E-06   |
| -0.0214327 | 0.77214276 | 0.11180967 | 0.12971582 | -0.2871625 | 7.40E-05   |
| -0.2185039 | 0.00280789 | -0.2637977 | 0.00028541 | -0.2734301 | 0.00016597 |
| -0.3153739 | 1.23E-05   | -0.218893  | 0.0027582  | -0.0637617 | 0.38854855 |
| 0.04666658 | 0.52818714 | -0.1404134 | 0.05660616 | 0.21040094 | 0.00404521 |
| -0.1950454 | 0.00780191 | -0.0934215 | 0.20593393 | 0.21173422 | 0.00381273 |
| 0.15249051 | 0.03824943 | -0.0472127 | 0.52336598 | -0.0390391 | 0.59778306 |
| -0.08776   | 0.23488559 | -0.1301736 | 0.07738341 | 0.16758314 | 0.02260313 |
| -0.2814412 | 0.00010411 | -0.1874092 | 0.01063594 | 0.26245934 | 0.00030724 |
| -0.0799615 | 0.27927211 | -0.0661332 | 0.37111126 | 0.1519708  | 0.03892053 |
| -0.1194514 | 0.10533838 | -0.185794  | 0.01134046 | 0.12606025 | 0.08730082 |
| -0.2930721 | 5.16E-05   | -0.2188015 | 0.00276981 | 0.02961268 | 0.68905791 |
| -0.3008565 | 3.17E-05   | -0.118664  | 0.10767007 | 0.09027078 | 0.22171147 |
| -0.1142056 | 0.12164538 | -0.0180891 | 0.80692832 | 0.01470598 | 0.84251465 |
| -0.0993096 | 0.17864813 | -0.1820448 | 0.01313628 | 0.23896911 | 0.00105328 |



|            |            |            |            |            |            |
|------------|------------|------------|------------|------------|------------|
| 0.05561299 | 0.45212701 | 0.00564856 | 0.93917362 | 0.1421014  | 0.05366997 |
| -0.2581017 | 0.00038956 | -0.3519179 | 9.01E-07   | 0.1200966  | 0.10345753 |
| 0.08390648 | 0.25615757 | 0.04489025 | 0.54402276 | -0.3833256 | 7.22E-08   |
| 0.16245776 | 0.0271478  | -0.0227302 | 0.75876062 | 0.17899097 | 0.01477862 |
| 0.05176548 | 0.48406235 | 0.08727907 | 0.23747031 | 0.15250793 | 0.03822711 |
| -0.0537142 | 0.46773816 | -0.2523648 | 0.00052918 | -0.2151221 | 0.00327521 |
| 0.15829955 | 0.03138936 | 0.04509805 | 0.54215825 | 0.14735451 | 0.04532848 |
| 0.08742525 | 0.23668258 | 0.05863464 | 0.4278977  | 0.2238644  | 0.00218969 |
| 0.05542429 | 0.45366518 | -0.039466  | 0.59378095 | 0.14281745 | 0.05246311 |
| -0.1124821 | 0.12741035 | -0.0154728 | 0.83441736 | -0.1699512 | 0.02073533 |
| -0.191867  | 0.00888782 | -0.1987433 | 0.00668813 | 0.24170469 | 0.00091794 |
| -0.2190102 | 0.00274338 | -0.2137987 | 0.00347646 | 0.08990747 | 0.22358453 |
| 0.01098128 | 0.8820636  | -0.0750514 | 0.30995156 | 0.20396447 | 0.00535692 |
| 0.03981075 | 0.59055773 | -0.025655  | 0.72886387 | 0.24705647 | 0.00069825 |
| -0.1407981 | 0.05592561 | -0.119506  | 0.10517803 | -0.1568255 | 0.03302252 |
| -0.2334808 | 0.00138153 | -0.2083177 | 0.00443406 | 0.10491921 | 0.15522695 |
| -0.0565079 | 0.44487207 | -0.0112998 | 0.87866888 | 0.20418495 | 0.00530634 |
| 0.02824764 | 0.70269762 | -0.033773  | 0.64811745 | 0.14195126 | 0.05392592 |
| -0.2635519 | 0.0002893  | -0.2581789 | 0.00038794 | 0.14257915 | 0.05286222 |
| -0.2376685 | 0.00112384 | -0.1263096 | 0.08667196 | -0.4002814 | 1.65E-08   |
| -0.154472  | 0.03577952 | -0.180638  | 0.01387181 | 0.09182188 | 0.21384001 |
| -0.0664521 | 0.36880509 | -0.1040384 | 0.15874314 | -0.1874372 | 0.01062407 |
| -0.1937435 | 0.00823157 | -0.2371419 | 0.00115363 | 0.22952174 | 0.00167376 |
| -0.2332336 | 0.00139831 | -0.2187837 | 0.00277207 | -0.433925  | 6.81E-10   |
| -0.1019555 | 0.16729542 | -0.1411111 | 0.05537691 | 0.11456033 | 0.12048423 |
| -0.1788794 | 0.01484187 | -0.1574294 | 0.0323449  | 0.1109699  | 0.13264011 |
| -0.2993033 | 3.49E-05   | -0.28711   | 7.42E-05   | 0.43592756 | 5.57E-10   |
| -0.3372128 | 2.68E-06   | -0.2500188 | 0.0005986  | -0.122365  | 0.09705427 |
| 0.11702974 | 0.11263863 | 0.13923076 | 0.05874136 | -0.2683897 | 0.00022097 |
| -0.2917445 | 5.60E-05   | -0.3033988 | 2.69E-05   | 0.39717117 | 2.18E-08   |
| -0.0072873 | 0.92157696 | -0.1186926 | 0.1075846  | 0.15069888 | 0.04060492 |
| -0.1539516 | 0.03641485 | -0.2620919 | 0.0003135  | 0.39572135 | 2.47E-08   |
| -0.283817  | 9.04E-05   | -0.346953  | 1.31E-06   | 0.38257157 | 7.70E-08   |
| -0.1694865 | 0.02109095 | -0.3003293 | 3.27E-05   | 0.27061509 | 0.00019487 |
| 0.1275074  | 0.08370172 | 0.1773346  | 0.01574238 | 0.02630336 | 0.72228919 |
| -0.0445225 | 0.54733045 | 0.19582421 | 0.00755449 | 0.0014782  | 0.98406781 |
| -0.2099101 | 0.00413395 | -0.2977507 | 3.85E-05   | 0.36300579 | 3.81E-07   |
| -0.0713729 | 0.33433008 | -0.1385797 | 0.05994476 | 0.20009986 | 0.00631654 |
| 0.00715688 | 0.92297609 | 0.00578587 | 0.93769793 | 0.02102561 | 0.77635495 |
| -0.1485018 | 0.04365876 | -0.1088873 | 0.14011064 | 0.26641971 | 0.00024674 |
| -0.0894984 | 0.22570688 | -0.2065744 | 0.00478495 | 0.2346373  | 0.00130544 |
| -0.0765863 | 0.300133   | 0.02117271 | 0.77483202 | -0.3102367 | 1.73E-05   |
| 0.16813538 | 0.02215505 | 0.05580738 | 0.45054554 | 0.06744209 | 0.36169861 |
| 0.4255309  | 1.56E-09   | 0.21620179 | 0.00311889 | -0.0829966 | 0.26136792 |
| 0.11631245 | 0.11487522 | 0.04423561 | 0.54991724 | -0.2141508 | 0.00342184 |
| -0.2034524 | 0.00547607 | -0.2515854 | 0.00055137 | 0.18761136 | 0.01055055 |

|            |            |            |            |            |            |
|------------|------------|------------|------------|------------|------------|
| 0.2403249  | 0.00098407 | 0.07467517 | 0.3123903  | 0.26943578 | 0.00020832 |
| 0.35563832 | 6.77E-07   | 0.21162535 | 0.00383125 | -0.0983439 | 0.18293068 |
| 0.12455612 | 0.09117184 | -0.0735632 | 0.31967081 | 0.14142835 | 0.05482523 |
| -0.2509568 | 0.00056989 | -0.1373591 | 0.06225564 | 0.13621479 | 0.06448806 |
| -0.0043978 | 0.95262454 | 0.08309094 | 0.26082447 | -0.0935994 | 0.20506801 |
| 0.38523104 | 6.14E-08   | 0.29689023 | 4.07E-05   | -0.1582557 | 0.03143698 |
| 0.01569326 | 0.8320932  | 0.0043909  | 0.95269867 | -0.0812585 | 0.27152253 |
| -0.0719628 | 0.33034049 | -0.2542368 | 0.00047921 | 0.13997934 | 0.05738228 |
| -0.0168717 | 0.81969276 | 0.14060321 | 0.05626954 | -0.2595931 | 0.00035932 |
| 0.15224108 | 0.03857029 | 0.27982034 | 0.00011454 | -0.5029381 | 2.98E-13   |
| -0.114772  | 0.11979568 | -0.0721822 | 0.32886405 | 0.57458828 | 1.21E-17   |
| -0.1945408 | 0.00796599 | -0.1606877 | 0.02888927 | 0.32898886 | 4.82E-06   |
| 0.0136247  | 0.8539598  | 0.17168071 | 0.01945691 | 0.45621811 | 6.75E-11   |
| -0.0245454 | 0.74016069 | -0.0023613 | 0.97455189 | 0.08077657 | 0.27438475 |
| -0.4102616 | 6.64E-09   | -0.290308  | 6.11E-05   | 0.27539357 | 0.00014824 |
| -0.1388312 | 0.05947763 | -0.0574185 | 0.43755772 | -0.2662711 | 0.0002488  |
| -0.0564277 | 0.44551969 | 0.25433584 | 0.0004767  | -0.3630361 | 3.80E-07   |
| 0.14535722 | 0.0483625  | 0.04057279 | 0.58346183 | 0.14859552 | 0.04352468 |
| -0.0111199 | 0.88058551 | -0.0396514 | 0.59204696 | 0.05291575 | 0.47438957 |
| 0.07283255 | 0.32451374 | -0.1103115 | 0.13496816 | 0.11604199 | 0.11572748 |
| -0.0412419 | 0.57726386 | -0.1287283 | 0.0807588  | 0.14577016 | 0.04772171 |
| -0.1090431 | 0.13954078 | -0.1296857 | 0.07850999 | 0.10948542 | 0.1379329  |
| 0.1528322  | 0.03781355 | 0.16583118 | 0.02407672 | 0.02663321 | 0.71895224 |
| -0.2374206 | 0.00113778 | -0.2496194 | 0.00061122 | 0.13845535 | 0.06017698 |
| -0.2193551 | 0.00270022 | -0.2519982 | 0.00053952 | 0.08122408 | 0.27172615 |
| -0.4214447 | 2.31E-09   | -0.3685489 | 2.45E-07   | 0.16044045 | 0.02913998 |
| -0.0796209 | 0.28133148 | -0.0219164 | 0.7671457  | -0.2330582 | 0.00141033 |
| -0.2954575 | 4.45E-05   | -0.2266425 | 0.00192058 | 0.13558399 | 0.0657464  |
| 0.29276629 | 5.25E-05   | 0.18041387 | 0.01399229 | -0.0471289 | 0.52410444 |
| -0.1537993 | 0.03660246 | -0.2292982 | 0.00169183 | 0.24642234 | 0.00072148 |
| -0.1954731 | 0.00766517 | -0.2608734 | 0.00033512 | -0.1842554 | 0.01204948 |
| -0.2191927 | 0.00272046 | -0.1937195 | 0.0082397  | 0.15792297 | 0.03179992 |
| -0.0625956 | 0.39730045 | -0.1755742 | 0.01682636 | 0.22897931 | 0.00171792 |
| -0.142064  | 0.0537336  | -0.1657458 | 0.02415057 | 0.15092249 | 0.04030442 |
| -0.2241328 | 0.00216227 | -0.0041193 | 0.95562153 | -0.4014388 | 1.49E-08   |
| -0.0388294 | 0.59975376 | -0.1229724 | 0.09539425 | 0.1877579  | 0.01048902 |
| 0.0451786  | 0.54143639 | -0.0616903 | 0.40417613 | 0.11782349 | 0.11020346 |
| -0.1020703 | 0.16681525 | -0.0385619 | 0.60227135 | -0.0168005 | 0.82044032 |
| -0.124955  | 0.09013228 | -0.0839501 | 0.25590974 | -0.4247503 | 1.68E-09   |
| 0.0505852  | 0.49409659 | 0.10638039 | 0.14952382 | 0.0966965  | 0.19040879 |
| -0.1004688 | 0.17360626 | -0.1150913 | 0.11876256 | 0.3322695  | 3.82E-06   |
| 0.34316049 | 1.74E-06   | 0.26657962 | 0.00024455 | -0.3074214 | 2.08E-05   |
| -0.1084683 | 0.14165138 | -0.1047925 | 0.1557291  | 0.22715293 | 0.00187453 |
| 0.39482221 | 2.68E-08   | 0.33641488 | 2.84E-06   | 0.21486095 | 0.00331407 |
| 0.26190331 | 0.00031676 | 0.10369163 | 0.16014364 | 0.36004558 | 4.81E-07   |
| -0.2290636 | 0.00171099 | -0.2578279 | 0.00039536 | 0.22159781 | 0.00243417 |

|            |            |            |            |            |            |
|------------|------------|------------|------------|------------|------------|
| 0.1211146  | 0.10054394 | -0.1994687 | 0.00648706 | -0.2215814 | 0.00243603 |
| -0.0224853 | 0.76128163 | -0.2849327 | 8.46E-05   | 0.26428848 | 0.00027777 |
| -0.0276524 | 0.70867557 | -0.1440738 | 0.05039993 | 0.28651312 | 7.69E-05   |
| 0.33497475 | 3.15E-06   | 0.2696151  | 0.00020622 | 0.21769799 | 0.00291342 |
| 0.0729189  | 0.32393892 | 0.17208516 | 0.019168   | -0.3491885 | 1.11E-06   |
| -0.1868784 | 0.01086311 | -0.1199632 | 0.10384423 | -0.247463  | 0.00068372 |
| -0.3488094 | 1.14E-06   | -0.2941865 | 4.81E-05   | 0.54376898 | 1.26E-15   |
| -0.0196347 | 0.79079616 | 0.01037737 | 0.88850621 | 0.28572171 | 8.07E-05   |
| -0.1373864 | 0.06220322 | -0.1555822 | 0.03445563 | 0.21281172 | 0.00363373 |
| -0.0425429 | 0.56530149 | -0.1806834 | 0.01384753 | 0.25388856 | 0.00048816 |
| 0.39637548 | 2.33E-08   | 0.08802511 | 0.23346902 | -0.2828897 | 9.55E-05   |
| -0.3996844 | 1.74E-08   | -0.2340743 | 0.00134199 | 0.35860275 | 5.38E-07   |
| -0.1665991 | 0.02342096 | -0.2093597 | 0.00423554 | 0.0595702  | 0.4205507  |
| 0.48915056 | 1.61E-12   | 0.23777687 | 0.0011178  | -0.1694657 | 0.021107   |
| 0.12315103 | 0.09491044 | 0.0357355  | 0.62915589 | 0.06768084 | 0.35999761 |
| -0.2265949 | 0.00192491 | -0.1588914 | 0.03075321 | 0.13922723 | 0.05874782 |
| -0.206676  | 0.00476383 | -0.2054671 | 0.00502057 | 0.13678686 | 0.06336399 |
| -0.0878653 | 0.23432228 | -0.010898  | 0.88295181 | -0.2079616 | 0.00450381 |
| 0.01034276 | 0.88887569 | -0.0821152 | 0.26648413 | 0.26873836 | 0.00021667 |
| 0.1940691  | 0.00812219 | 0.01618595 | 0.82690327 | 0.28932094 | 6.49E-05   |
| 0.00469288 | 0.94944974 | -0.0503691 | 0.49594551 | 0.30445475 | 2.52E-05   |
| -0.0233446 | 0.75244899 | -0.0395324 | 0.59315965 | 0.2455908  | 0.00075302 |
| -0.4531602 | 9.36E-11   | -0.3467065 | 1.33E-06   | -0.4298891 | 1.02E-09   |
| -0.0385895 | 0.60201142 | -0.1110758 | 0.13226861 | 0.05759684 | 0.43613367 |
| 0.04707241 | 0.52460224 | -0.1418345 | 0.05412559 | 0.19498712 | 0.0078207  |
| -0.1634825 | 0.0261813  | -0.1548968 | 0.03526803 | 0.22246705 | 0.00233763 |
| 0.0034862  | 0.9624365  | -0.0388097 | 0.59993864 | 0.2611378  | 0.00033032 |
| -0.2264712 | 0.00193625 | -0.084489  | 0.2528595  | -0.1728602 | 0.01862475 |
| -0.1150256 | 0.11897445 | -0.0391111 | 0.59710712 | -0.3259049 | 5.98E-06   |
| 0.39233008 | 3.33E-08   | 0.45418032 | 8.39E-11   | -0.2062969 | 0.00484304 |
| -0.2042862 | 0.00528326 | -0.0705748 | 0.33977715 | -0.3389174 | 2.37E-06   |
| -0.3354924 | 3.04E-06   | -0.3237884 | 6.93E-06   | 0.00202591 | 0.97816578 |
| -0.3823266 | 7.86E-08   | -0.3803656 | 9.27E-08   | 0.41142613 | 5.96E-09   |
| 0.27293814 | 0.00017072 | 0.21590284 | 0.00316148 | -0.3012436 | 3.09E-05   |
| -0.1704343 | 0.02037111 | -0.2567536 | 0.0004189  | 0.29289242 | 5.21E-05   |
| -0.3011134 | 3.11E-05   | -0.3469046 | 1.31E-06   | 0.4809075  | 4.25E-12   |
| 0.23072825 | 0.00157923 | 0.12836146 | 0.0816342  | -0.219379  | 0.00269724 |
| 0.38696579 | 5.30E-08   | 0.32717167 | 5.48E-06   | -0.2101325 | 0.00409353 |
| 0.14932191 | 0.04249708 | -0.0402118 | 0.5868184  | -0.2317042 | 0.00150635 |
| -0.2220383 | 0.0023848  | -0.1934115 | 0.00834446 | 0.17670799 | 0.01612102 |
| -0.2258212 | 0.00199681 | -0.1485469 | 0.04359427 | -0.0658182 | 0.37340042 |
| -0.2504149 | 0.00058632 | -0.3312953 | 4.10E-06   | 0.11622097 | 0.11516294 |
| -0.1017384 | 0.16820596 | -0.0550124 | 0.45703254 | -0.3074344 | 2.07E-05   |
| -0.0904607 | 0.22073662 | -0.0196374 | 0.79076883 | -0.3451856 | 1.49E-06   |
| -0.1304882 | 0.07666396 | -0.1071189 | 0.14670237 | -0.2673564 | 0.00023416 |
| 0.07985062 | 0.27994148 | -0.0214348 | 0.77212108 | 0.14078916 | 0.05594135 |

|            |            |            |            |            |            |
|------------|------------|------------|------------|------------|------------|
| -0.0599787 | 0.41736595 | -0.1126019 | 0.12700294 | -0.1883611 | 0.01023908 |
| 0.08526226 | 0.24852707 | -0.0511133 | 0.48959318 | -0.376527  | 1.28E-07   |
| -0.12386   | 0.09300912 | 0.09790675 | 0.18489353 | -0.5271598 | 1.27E-14   |
| 0.18115479 | 0.01359753 | 0.12298504 | 0.09536004 | 0.04077367 | 0.58159784 |
| -0.1898916 | 0.00962836 | -0.2375209 | 0.00113212 | -0.3630206 | 3.80E-07   |
| -0.1818641 | 0.01322882 | -0.1247252 | 0.09072986 | 0.08949302 | 0.22573497 |
| 0.00946739 | 0.89822776 | -0.0137362 | 0.8527779  | -0.1896361 | 0.00972802 |
| -0.1362405 | 0.06443724 | -0.163647  | 0.02602887 | -0.2978446 | 3.83E-05   |
| -0.1321648 | 0.07292068 | -0.0874644 | 0.23647208 | 0.25695444 | 0.0004144  |
| -0.1869851 | 0.01081711 | -0.212674  | 0.00365618 | 0.32518464 | 6.29E-06   |
| -0.061932  | 0.4023335  | -0.1203514 | 0.10272213 | 0.16035886 | 0.02922311 |
| -0.352382  | 8.69E-07   | -0.320429  | 8.72E-06   | 0.11048713 | 0.13434398 |
| -0.2127395 | 0.00364549 | -0.1247671 | 0.09062065 | 0.27215673 | 0.00017851 |
| 0.01926616 | 0.79463531 | -0.0723349 | 0.32783965 | 0.34693852 | 1.31E-06   |
| 0.10075257 | 0.17238835 | 0.01235832 | 0.86740282 | -0.2379243 | 0.00110963 |
| -0.0871006 | 0.23843461 | -0.1742221 | 0.01770247 | -0.4356699 | 5.72E-10   |
| -0.358358  | 5.49E-07   | -0.3009055 | 3.16E-05   | 0.18202174 | 0.01314804 |
| -0.0372853 | 0.61435092 | -0.1418342 | 0.05412626 | 0.28273831 | 9.64E-05   |
| 0.18653475 | 0.01101242 | 0.07559031 | 0.30648059 | -0.2793121 | 0.00011801 |
| -0.2613533 | 0.00032645 | -0.1464586 | 0.04666919 | -0.2284459 | 0.00176238 |
| -0.2106224 | 0.00400574 | -0.0764613 | 0.30092501 | -0.4179037 | 3.25E-09   |
| -0.123561  | 0.09380735 | -0.2005922 | 0.0061863  | 0.13326297 | 0.07055029 |
| 0.13421073 | 0.06855527 | 0.00455281 | 0.95095664 | 0.22039732 | 0.00257346 |
| -0.1814211 | 0.01345806 | -0.1629943 | 0.02663798 | 0.35222937 | 8.79E-07   |
| -0.2359877 | 0.00122146 | -0.1315682 | 0.07423527 | 0.2589238  | 0.00037261 |
| -0.2328873 | 0.00142213 | -0.1332821 | 0.07050965 | 0.1265909  | 0.08596698 |
| -0.0353397 | 0.63296077 | -0.1692248 | 0.02129351 | 0.25904885 | 0.0003701  |
| 0.20851747 | 0.00439537 | 0.06777304 | 0.35934207 | 0.23830296 | 0.0010889  |
| -0.0725746 | 0.3262351  | -0.0217698 | 0.7686589  | 0.22662548 | 0.00192212 |
| -0.0761121 | 0.30314441 | -0.1053773 | 0.1534217  | 0.21362943 | 0.00350298 |
| -0.1247744 | 0.09060178 | -0.1751549 | 0.01709393 | 0.07967622 | 0.28099652 |
| -0.0125466 | 0.86540179 | -0.0606064 | 0.41249972 | 0.18783504 | 0.01045676 |
| -0.2713757 | 0.00018663 | -0.0568456 | 0.44215145 | 0.20489599 | 0.0051461  |
| -0.0869278 | 0.23937112 | -0.0754678 | 0.3072674  | -0.1564518 | 0.03344794 |
| 0.09341093 | 0.20598549 | 0.01927212 | 0.79457324 | 0.28407228 | 8.90E-05   |
| 0.32058909 | 8.63E-06   | 0.14392961 | 0.05063329 | 0.25629472 | 0.00042934 |
| -0.0156842 | 0.83218846 | 0.02418877 | 0.74380352 | 0.40389436 | 1.19E-08   |
| 0.18919251 | 0.0099032  | 0.07889389 | 0.28576209 | 0.17939362 | 0.01455228 |
| -0.1435509 | 0.05125038 | -0.2646372 | 0.00027245 | 0.11002396 | 0.13599443 |
| 0.21524021 | 0.00325777 | 0.06697264 | 0.36505774 | 0.33953083 | 2.27E-06   |
| 0.08158584 | 0.26958981 | 0.02745398 | 0.71067216 | 0.23663048 | 0.00118324 |
| 0.18777527 | 0.01048175 | 0.0488034  | 0.50945145 | 0.27881286 | 0.00012151 |
| -0.2966575 | 4.13E-05   | -0.2001151 | 0.00631248 | 0.2949201  | 4.60E-05   |
| 0.07651704 | 0.30057143 | -0.0415239 | 0.57466096 | 0.23829711 | 0.00108921 |
| -0.0301539 | 0.68367705 | -0.1228851 | 0.09563167 | 0.19418264 | 0.00808435 |
| -0.2997942 | 3.39E-05   | -0.1947446 | 0.00789937 | 0.33674124 | 2.78E-06   |

|            |            |            |            |            |            |
|------------|------------|------------|------------|------------|------------|
| 0.09105971 | 0.2176825  | -0.0070143 | 0.92450622 | 0.19277469 | 0.00856481 |
| -0.0137129 | 0.85302469 | -0.1055194 | 0.15286468 | 0.14547562 | 0.04817804 |
| 0.17477613 | 0.01733878 | -0.0158017 | 0.8309498  | 0.13553791 | 0.0658391  |
| -0.2283856 | 0.00176747 | -0.17908   | 0.01472831 | -0.1230746 | 0.09511722 |
| 0.08336499 | 0.2592498  | -0.0622257 | 0.40010125 | 0.17863091 | 0.01498362 |
| -0.1135449 | 0.12383099 | -0.1822764 | 0.01301849 | 0.06552053 | 0.37557015 |
| 0.20048203 | 0.00621524 | -0.0024852 | 0.97321786 | -0.0796278 | 0.28128994 |
| -0.1968808 | 0.00723001 | -0.2354984 | 0.0012513  | -0.4233337 | 1.93E-09   |
| -0.1528118 | 0.03783951 | -0.1041689 | 0.15821834 | -0.491384  | 1.23E-12   |
| 0.26098405 | 0.0003331  | -0.011497  | 0.87656823 | 0.12323918 | 0.09467238 |
| -0.2402336 | 0.00098859 | -0.2336573 | 0.00136966 | 0.53260634 | 6.04E-15   |
| -0.032407  | 0.6614508  | -0.0564807 | 0.44509155 | -0.2440789 | 0.00081363 |
| 0.19998144 | 0.00634823 | 0.13194626 | 0.07340007 | 0.24224298 | 0.00089327 |
| 0.10073847 | 0.17244872 | 0.0202388  | 0.78451531 | 0.00079017 | 0.99148308 |
| -0.0979783 | 0.18457135 | -0.014483  | 0.84487175 | -0.2348423 | 0.00129236 |
| -0.1817196 | 0.01330317 | -0.1688952 | 0.02155106 | -0.108187  | 0.1426933  |
| -0.100101  | 0.1751946  | -0.2121614 | 0.00374084 | 0.46901892 | 1.65E-11   |
| 0.08339983 | 0.25905005 | -0.0300473 | 0.68473558 | 0.12812317 | 0.08220689 |
| -0.0883772 | 0.23159735 | -0.1397705 | 0.05775875 | 0.06462427 | 0.38215015 |
| -0.1554681 | 0.03458984 | -0.2965732 | 4.15E-05   | -0.1847304 | 0.01182656 |
| 0.03222928 | 0.66319401 | -0.0278467 | 0.70672193 | 0.0867698  | 0.24022921 |
| -0.0950762 | 0.19797931 | -0.1396959 | 0.05789375 | 0.18704079 | 0.01079315 |
| -0.1503689 | 0.04105179 | -0.0794592 | 0.28231312 | -0.2636319 | 0.00028803 |
| 0.17606034 | 0.01652069 | 0.15997771 | 0.02961415 | -0.458548  | 5.25E-11   |
| -0.069446  | 0.34757661 | -0.1602884 | 0.02929511 | 0.25951579 | 0.00036084 |
| -0.2394317 | 0.00102917 | -0.3552079 | 7.00E-07   | 0.20623515 | 0.00485606 |
| -0.4069923 | 8.98E-09   | -0.2165871 | 0.00306476 | -0.1431141 | 0.05196969 |
| -0.1074582 | 0.14541963 | -0.1646134 | 0.02514899 | -0.0328742 | 0.65687889 |
| -0.1471963 | 0.04556285 | -0.1554613 | 0.03459781 | -0.4205263 | 2.53E-09   |
| -0.1929361 | 0.00850849 | -0.2099255 | 0.00413115 | 0.19463598 | 0.00793482 |
| 0.0574127  | 0.43760437 | -0.0817649 | 0.26853637 | 0.02078923 | 0.77880398 |
| -0.0807872 | 0.27432167 | -0.1896824 | 0.0097099  | 0.40614794 | 9.70E-09   |
| 0.04167511 | 0.57326767 | -0.0634399 | 0.39095216 | 0.13367236 | 0.06968281 |
| 0.11182508 | 0.12966264 | -0.0243365 | 0.74229378 | 0.18603637 | 0.0112322  |
| -0.1084076 | 0.14187582 | -0.2573769 | 0.00040509 | 0.15900414 | 0.03063329 |
| 0.17530808 | 0.01699573 | 0.03720635 | 0.61510125 | 0.25413953 | 0.0004817  |
| -0.3948959 | 2.66E-08   | -0.3368064 | 2.76E-06   | 0.05979965 | 0.41876011 |
| 0.06147138 | 0.40584903 | 0.01280506 | 0.86265594 | 0.17039384 | 0.02040141 |
| -0.2451053 | 0.00077201 | -0.3196346 | 9.21E-06   | 0.33514639 | 3.11E-06   |
| -0.2819495 | 0.00010103 | -0.0663593 | 0.36947558 | -0.201154  | 0.00604063 |
| -0.3504671 | 1.01E-06   | -0.2810853 | 0.00010632 | 0.15042529 | 0.04097512 |
| 0.27783564 | 0.00012865 | 0.0900643  | 0.22277459 | 0.14269877 | 0.05266157 |
| -0.0675043 | 0.3612548  | -0.0926413 | 0.20976346 | 0.19720211 | 0.00713382 |
| -0.0108443 | 0.88352467 | -0.1702441 | 0.02051384 | 0.30724603 | 2.10E-05   |
| -0.1047854 | 0.15575748 | 0.16066012 | 0.02891716 | -0.3471333 | 1.29E-06   |
| -0.1345025 | 0.06795037 | -0.1464922 | 0.04661821 | 0.18395319 | 0.01219322 |

|            |            |            |            |            |            |
|------------|------------|------------|------------|------------|------------|
| -0.2188854 | 0.00275915 | -0.0681974 | 0.35633414 | -0.0971129 | 0.18849801 |
| -0.0257515 | 0.72788369 | -0.0508549 | 0.49179388 | -0.2107551 | 0.00398224 |
| -0.1685301 | 0.02183954 | -0.0980718 | 0.18415042 | -0.0682711 | 0.35581372 |
| -0.0339249 | 0.64664156 | -0.0937548 | 0.20431363 | -0.3192384 | 9.46E-06   |
| -0.1617268 | 0.02785578 | -0.1078548 | 0.14393109 | -0.0383695 | 0.60408508 |
| -0.0685181 | 0.35407211 | -0.0556354 | 0.4519443  | -0.1082183 | 0.14257714 |
| -0.0007854 | 0.99153458 | 0.25854641 | 0.0003803  | -0.3566442 | 6.27E-07   |
| 0.18789619 | 0.01043125 | 0.06387898 | 0.38767478 | 0.12629736 | 0.08670279 |
| 0.24675152 | 0.00070933 | 0.02390198 | 0.74673708 | -0.1929907 | 0.0084895  |
| 0.1243627  | 0.0916794  | 0.27534721 | 0.00014864 | -0.1881746 | 0.0103158  |
| -0.0986364 | 0.18162563 | -0.1349973 | 0.06693475 | -0.3508876 | 9.74E-07   |
| -0.0313771 | 0.67157541 | -0.0491062 | 0.50682437 | 0.18881562 | 0.01005424 |
| -0.1618631 | 0.02772258 | -0.2032608 | 0.00552127 | 0.05496005 | 0.45746195 |
| -0.2472185 | 0.00069243 | -0.2138301 | 0.00347155 | -0.3316708 | 3.99E-06   |
| -0.0441902 | 0.55032718 | -0.1450165 | 0.04889661 | 0.07095878 | 0.33714952 |
| -0.2295303 | 0.00167307 | -0.2475668 | 0.00068006 | 0.26371807 | 0.00028666 |
| 0.06883495 | 0.35184549 | 0.12472633 | 0.09072704 | 0.27683771 | 0.00013635 |
| 0.01911734 | 0.79618689 | -0.1131518 | 0.12514552 | -0.329834  | 4.54E-06   |
| -0.3919652 | 3.44E-08   | -0.4003326 | 1.64E-08   | 0.11684674 | 0.11320596 |
| 0.11264069 | 0.12687115 | 0.05798273 | 0.43306071 | -0.0280119 | 0.70506345 |
| -0.2248869 | 0.00208689 | -0.1488714 | 0.04313195 | 0.27552745 | 0.0001471  |
| 0.18513681 | 0.01163868 | -0.0039673 | 0.95725706 | 0.10197021 | 0.16723373 |
| 0.16776255 | 0.02245671 | 0.04283491 | 0.56263323 | 0.22565537 | 0.00201254 |
| 0.14041423 | 0.05660472 | 0.09100554 | 0.21795746 | -0.0097521 | 0.89518415 |
| 0.19092023 | 0.00923621 | 0.21262266 | 0.00366458 | -0.0935443 | 0.205336   |
| 0.01125898 | 0.87910368 | -0.0965132 | 0.19125443 | -0.0218859 | 0.76746049 |
| 0.00500781 | 0.94606237 | 0.05432413 | 0.46269127 | -0.2152939 | 0.00324987 |
| -0.0867734 | 0.24020951 | -0.0881255 | 0.23293411 | 0.06016543 | 0.41591478 |
| 0.053739   | 0.46753203 | 0.00436952 | 0.95292867 | -0.1687323 | 0.02167933 |
| 0.26368743 | 0.00028715 | 0.01532231 | 0.83600547 | 0.04208886 | 0.56946313 |
| -0.4845811 | 2.77E-12   | -0.3671164 | 2.75E-07   | 0.48206173 | 3.72E-12   |
| 0.05424061 | 0.46338054 | -0.035587  | 0.63058253 | 0.18560466 | 0.01142569 |
| -0.2012922 | 0.00600528 | -0.1259616 | 0.0875505  | 0.1815869  | 0.01337184 |
| -0.3433367 | 1.71E-06   | -0.3003784 | 3.26E-05   | 0.17002715 | 0.02067769 |
| 0.15000405 | 0.04155067 | -0.0300554 | 0.6846553  | 0.22645252 | 0.00193797 |
| -0.0365074 | 0.62176277 | -0.075623  | 0.30627116 | 0.31624246 | 1.16E-05   |
| -0.1112777 | 0.13156252 | -0.1163211 | 0.11484795 | -0.050388  | 0.49578347 |
| -0.0196985 | 0.79013271 | -0.0541741 | 0.4639301  | -0.013757  | 0.8525579  |
| -0.0595548 | 0.42067071 | 0.06831784 | 0.35548366 | -0.2919143 | 5.54E-05   |
| -0.1701797 | 0.02056236 | -0.1080688 | 0.14313275 | 0.18371013 | 0.01230992 |
| 0.09883619 | 0.18073819 | 0.06828772 | 0.35569634 | -0.2346192 | 0.0013066  |
| -0.3469179 | 1.31E-06   | -0.2116939 | 0.00381958 | 0.24718384 | 0.00069367 |
| 0.1068725  | 0.14763916 | 0.1213634  | 0.09984182 | 0.17302766 | 0.01850914 |
| -0.0737262 | 0.31859663 | -0.1479622 | 0.04443749 | 0.16191722 | 0.02766983 |
| 0.24408656 | 0.00081332 | 0.18429557 | 0.01203047 | -0.3416494 | 1.94E-06   |
| 0.00698397 | 0.92483149 | -0.0193711 | 0.79354214 | 0.01984678 | 0.78858987 |

|            |            |            |            |            |            |
|------------|------------|------------|------------|------------|------------|
| -0.047993  | 0.51651663 | 0.12019849 | 0.10316295 | -0.0425212 | 0.56550023 |
| -0.2311673 | 0.00154605 | -0.2079577 | 0.00450456 | 0.36473719 | 3.32E-07   |
| 0.03067885 | 0.67847367 | -0.0631377 | 0.39321773 | 0.36082759 | 4.52E-07   |
| -0.0063359 | 0.93178925 | -0.0479884 | 0.51655654 | -0.1873663 | 0.01065417 |
| -0.0967679 | 0.19008009 | -0.1989043 | 0.00664302 | -0.2257668 | 0.00200196 |
| -0.0589558 | 0.42536742 | -0.2332513 | 0.0013971  | 0.22692714 | 0.00189477 |
| -0.2171488 | 0.00298737 | -0.239954  | 0.00100257 | 0.49950971 | 4.56E-13   |
| -0.0601137 | 0.41631633 | -0.1598435 | 0.02975289 | 0.28875027 | 6.72E-05   |
| -0.104313  | 0.15764068 | -0.0909568 | 0.2182052  | 0.09543456 | 0.19628657 |
| -0.2548598 | 0.00046358 | -0.2511866 | 0.00056306 | -0.2465803 | 0.00071563 |
| -0.1112668 | 0.13160055 | 0.01456198 | 0.84403706 | -0.1378619 | 0.06129514 |
| -0.2341306 | 0.00133829 | -0.080341  | 0.27698925 | -0.0050921 | 0.9451554  |
| -0.2624128 | 0.00030803 | -0.2109743 | 0.00394371 | 0.40473643 | 1.10E-08   |
| 0.08426176 | 0.25414256 | 0.12985826 | 0.07810999 | 0.05555412 | 0.4526066  |
| -0.0324708 | 0.6608265  | 0.00469355 | 0.94944255 | -0.2122561 | 0.00372507 |
| -0.4109823 | 6.21E-09   | -0.2528022 | 0.00051709 | -0.3871219 | 5.22E-08   |
| -0.0199398 | 0.78762213 | -0.0587493 | 0.42699355 | 0.30635483 | 2.22E-05   |
| -0.0352716 | 0.63361696 | -0.1805722 | 0.0139071  | 0.31755994 | 1.06E-05   |
| -0.3368297 | 2.76E-06   | -0.2158205 | 0.00317331 | 0.46247895 | 3.42E-11   |
| -0.4203645 | 2.57E-09   | -0.1861265 | 0.01119215 | 0.40926523 | 7.28E-09   |
| -0.171908  | 0.01929408 | -0.2044698 | 0.00524163 | 0.16937789 | 0.02117483 |
| -0.0555933 | 0.4522871  | -0.2554189 | 0.00044995 | 0.25205256 | 0.00053797 |
| -0.0432137 | 0.55918027 | 0.07884942 | 0.28603458 | -0.0525166 | 0.47773395 |
| -0.1037666 | 0.15984012 | -0.2720346 | 0.00017976 | 0.25268291 | 0.00052037 |
| -0.3186988 | 9.81E-06   | -0.1025486 | 0.164826   | -0.3392826 | 2.31E-06   |
| 0.04365047 | 0.55521228 | 0.02246578 | 0.76148228 | 0.27256618 | 0.00017439 |
| 0.33211645 | 3.87E-06   | 0.189655   | 0.00972061 | 0.04479458 | 0.54488233 |
| 0.13092845 | 0.07566634 | 0.28193259 | 0.00010113 | -0.2819749 | 0.00010087 |
| -0.1276199 | 0.08342702 | -0.0752408 | 0.30872893 | -0.2992482 | 3.51E-05   |
| 0.31805738 | 1.02E-05   | 0.05786251 | 0.43401672 | -0.2111808 | 0.00390772 |
| 0.16387807 | 0.02581616 | -0.0034871 | 0.96242666 | 0.17189656 | 0.01930226 |
| 0.25009987 | 0.00059607 | -0.1027743 | 0.1638932  | -0.3000188 | 3.34E-05   |
| -0.0345796 | 0.640296   | -0.205792  | 0.00495037 | 0.16233109 | 0.02726938 |
| -0.3622418 | 4.05E-07   | -0.2552689 | 0.00045357 | 0.51558283 | 5.92E-14   |
| -0.0401782 | 0.587131   | -0.0484876 | 0.5121981  | 0.33105422 | 4.17E-06   |
| -0.0427624 | 0.56329563 | -0.1391584 | 0.05887412 | 0.08968801 | 0.22472142 |
| -0.2155487 | 0.00321262 | -0.0084162 | 0.90947675 | -0.2720682 | 0.00017942 |
| 0.19175726 | 0.0089276  | 0.11449387 | 0.12070112 | -0.2139248 | 0.00345681 |
| -0.1297419 | 0.07837956 | -0.0279709 | 0.70547417 | 0.40343252 | 1.24E-08   |
| 0.31144752 | 1.59E-05   | 0.14217398 | 0.05354659 | 0.35093545 | 9.70E-07   |
| 0.3547381  | 7.26E-07   | 0.14770405 | 0.04481421 | -0.2638327 | 0.00028485 |
| 0.08226182 | 0.26562857 | 0.10431654 | 0.15762637 | -0.221017  | 0.00250069 |
| -0.0108171 | 0.88381468 | 0.02471897 | 0.73838964 | -0.2258219 | 0.00199675 |
| -0.2407291 | 0.00096426 | -0.2660556 | 0.00025181 | 0.14393607 | 0.05062282 |
| -0.0070059 | 0.92459584 | -0.0917143 | 0.21437926 | 0.0122383  | 0.86867888 |
| -0.0754112 | 0.30763163 | -0.1474977 | 0.04511726 | 0.29632074 | 4.21E-05   |

|            |            |            |            |            |            |
|------------|------------|------------|------------|------------|------------|
| -0.1940504 | 0.00812844 | -0.2163464 | 0.00309848 | 0.32686398 | 5.60E-06   |
| 0.21081715 | 0.0039713  | 0.07022043 | 0.34221357 | -0.288653  | 6.76E-05   |
| -0.1191484 | 0.10623096 | -0.2561658 | 0.00043232 | 0.13381365 | 0.06938544 |
| -0.0114018 | 0.87758165 | -0.1137728 | 0.12307345 | 0.0051999  | 0.94399676 |
| -0.2637199 | 0.00028663 | -0.1113226 | 0.13140585 | 0.03356765 | 0.65011484 |
| -0.2295002 | 0.00167549 | -0.2355104 | 0.00125055 | 0.15993577 | 0.02965745 |
| 0.14206297 | 0.05373538 | 0.01461273 | 0.84350043 | -0.2115449 | 0.003845   |
| 0.07390251 | 0.31743749 | 0.0468064  | 0.52695061 | -0.4489353 | 1.46E-10   |
| -0.3062354 | 2.24E-05   | -0.1436066 | 0.05115918 | 0.17367681 | 0.01806685 |
| 0.12521206 | 0.08946722 | 0.22746064 | 0.00184727 | -0.083232  | 0.26001329 |
| 0.0228126  | 0.75791341 | 0.09142811 | 0.21581911 | -0.1638158 | 0.02587332 |
| -0.2451818 | 0.00076899 | -0.1368001 | 0.06333824 | 0.3923347  | 3.33E-08   |
| -0.3374565 | 2.64E-06   | -0.2603797 | 0.00034427 | -0.1138653 | 0.12276717 |
| 0.49009618 | 1.44E-12   | 0.28519306 | 8.33E-05   | -0.0508452 | 0.49187709 |
| -0.0821292 | 0.26640244 | -0.1225511 | 0.0965434  | 0.19241156 | 0.00869277 |
| 0.2168778  | 0.00302449 | 0.13012327 | 0.077499   | -0.3128304 | 1.45E-05   |
| -0.0534161 | 0.47021513 | -0.1226097 | 0.096383   | 0.2672132  | 0.00023604 |
| -0.0924723 | 0.2105996  | -0.0780192 | 0.29115436 | -0.1733047 | 0.01831923 |
| 0.19526219 | 0.00773232 | 0.03421802 | 0.64379717 | 0.08693888 | 0.23931079 |
| -0.001333  | 0.98563258 | -0.1156068 | 0.1171091  | -0.1793731 | 0.01456373 |
| -0.2237838 | 0.00219798 | -0.2022342 | 0.00576912 | -0.0086001 | 0.90750702 |
| -0.1693489 | 0.02119729 | -0.0628642 | 0.39527427 | -0.0226476 | 0.75961081 |
| -0.1616033 | 0.02797689 | 0.05247743 | 0.478063   | -0.3094214 | 1.82E-05   |
| -0.1163892 | 0.11463426 | -0.0130876 | 0.85965586 | -0.2756868 | 0.00014575 |
| -0.0465082 | 0.5295898  | -0.1055779 | 0.15263623 | 0.03114814 | 0.67383461 |
| -0.1335482 | 0.06994494 | -0.0661619 | 0.3709046  | 0.01544406 | 0.83472105 |
| -0.051803  | 0.48374536 | -0.106218  | 0.15014974 | -0.0620897 | 0.40113414 |
| 0.02186744 | 0.76765115 | -0.0835749 | 0.25804804 | 0.23095492 | 0.00156202 |
| 0.22040817 | 0.00257217 | 0.05647499 | 0.44513772 | -0.3174279 | 1.07E-05   |
| 0.367792   | 2.60E-07   | 0.20190659 | 0.0058503  | 0.07157252 | 0.33297669 |
| 0.08749729 | 0.23629499 | -0.0108152 | 0.88383479 | 0.05204584 | 0.48169502 |
| -0.0443162 | 0.54918956 | -0.2059472 | 0.00491716 | 0.1129475  | 0.12583315 |
| -0.1785225 | 0.01504585 | -0.0789477 | 0.28543271 | 0.30450006 | 2.51E-05   |
| 0.18668642 | 0.0109463  | -0.0407509 | 0.58180941 | 0.17596885 | 0.01657784 |
| -0.3123271 | 1.50E-05   | -0.2206792 | 0.00254012 | 0.47131172 | 1.28E-11   |
| -0.0931959 | 0.20703587 | -0.238369  | 0.00108532 | 0.2724866  | 0.00017518 |
| 0.114051   | 0.12215401 | 0.03002088 | 0.68499837 | 0.31637572 | 1.15E-05   |
| 0.57317856 | 1.51E-17   | 0.25452435 | 0.00047194 | -0.2579058 | 0.0003937  |
| -0.1329966 | 0.07111951 | -0.2115306 | 0.00384744 | 0.23101691 | 0.00155734 |
| 0.00223807 | 0.97587979 | 0.06759598 | 0.36060161 | -0.336849  | 2.75E-06   |
| -0.0187451 | 0.80007059 | 0.12364296 | 0.09358791 | 0.07799767 | 0.29128763 |
| 0.22501577 | 0.00207425 | 0.10382588 | 0.15960034 | 0.49748485 | 5.85E-13   |
| 0.59616013 | 3.47E-19   | 0.23988397 | 0.0010061  | 0.27772265 | 0.0001295  |
| 0.0322402  | 0.66308688 | 0.05237822 | 0.47889656 | 0.04894824 | 0.50819407 |
| -0.1979601 | 0.00691143 | -0.2545067 | 0.00047238 | -0.1210679 | 0.1006762  |
| -0.3007876 | 3.18E-05   | -0.2292343 | 0.00169703 | -0.322219  | 7.72E-06   |



|            |            |            |            |            |            |
|------------|------------|------------|------------|------------|------------|
| -0.066506  | 0.36841614 | -0.0357376 | 0.62913569 | -0.224871  | 0.00208846 |
| -0.0143991 | 0.84575936 | -0.1586629 | 0.03099752 | 0.37024164 | 2.13E-07   |
| -0.0293758 | 0.69141754 | -0.0912486 | 0.21672564 | 0.31576483 | 1.20E-05   |
| 0.03921648 | 0.59611858 | -0.0509055 | 0.49136272 | 0.19099721 | 0.00920744 |
| -0.0315318 | 0.67005153 | -0.0893287 | 0.22659169 | -0.2079287 | 0.00451028 |
| 0.09596434 | 0.19380316 | 0.06184932 | 0.40296313 | 0.01581185 | 0.83084332 |
| 0.1641648  | 0.02555424 | 0.01988825 | 0.78815864 | 0.24699806 | 0.00070036 |
| -0.3079617 | 2.00E-05   | -0.208034  | 0.00448954 | 0.08786717 | 0.23431211 |
| -0.1385824 | 0.05993973 | -0.1061271 | 0.15050105 | -0.1287752 | 0.08064739 |
| -0.1433617 | 0.051561   | -0.0565944 | 0.44417415 | -0.1059041 | 0.15136522 |
| 0.04189682 | 0.57122744 | 0.11395781 | 0.12246146 | -0.2692559 | 0.00021045 |
| 0.07098536 | 0.33696812 | -0.0897349 | 0.22447812 | 0.31915953 | 9.51E-06   |
| 0.40249948 | 1.35E-08   | 0.23249191 | 0.00144979 | -0.3148699 | 1.27E-05   |
| 0.17750579 | 0.0156403  | -0.0017576 | 0.98105673 | 0.13024353 | 0.07722302 |
| 0.39270361 | 3.22E-08   | 0.13626594 | 0.0643869  | -0.1698122 | 0.02084116 |
| -0.3461821 | 1.39E-06   | -0.1010427 | 0.17114975 | 0.26445224 | 0.00027526 |
| 0.15786163 | 0.03186723 | 0.04336654 | 0.5577904  | -0.1640033 | 0.02570145 |
| -0.1895375 | 0.00976673 | -0.1800514 | 0.01418905 | 0.26484296 | 0.00026936 |
| -0.0142622 | 0.84720778 | 0.0185074  | 0.80255402 | -0.2158641 | 0.00316704 |
| 0.04301365 | 0.56100278 | -0.0818368 | 0.26811479 | 0.38670877 | 5.41E-08   |
| -0.3251696 | 6.30E-06   | -0.2819205 | 0.0001012  | 0.18877643 | 0.01007006 |
| -0.1043306 | 0.15757004 | -0.1928035 | 0.00855472 | 0.20578185 | 0.00495255 |
| 0.08185775 | 0.26799161 | -0.0568208 | 0.44235109 | -0.4028113 | 1.31E-08   |
| -0.393754  | 2.94E-08   | -0.396037  | 2.40E-08   | 0.25937883 | 0.00036353 |
| -0.1418501 | 0.0540989  | -0.0693099 | 0.34852468 | -0.1592548 | 0.03036803 |
| 0.33095838 | 4.20E-06   | 0.25875402 | 0.00037605 | -0.4428095 | 2.77E-10   |
| -0.0875541 | 0.23598962 | -0.0976135 | 0.1862189  | 0.35951532 | 5.01E-07   |
| 0.03069182 | 0.67834526 | 0.05366244 | 0.46816748 | -0.0491775 | 0.5062069  |
| -0.3028622 | 2.79E-05   | -0.1819809 | 0.01316894 | -0.257256  | 0.00040773 |
| -0.1941206 | 0.008105   | -0.092858  | 0.20869464 | 0.15255901 | 0.0381617  |
| -0.3081068 | 1.99E-05   | -0.1748211 | 0.01730954 | -0.1974102 | 0.00707214 |
| 0.63273698 | 4.39E-22   | 0.23437127 | 0.0013226  | 0.10245127 | 0.16522922 |
| -0.2514474 | 0.00055539 | -0.1184329 | 0.10836203 | -0.0269141 | 0.71611508 |
| 0.4674305  | 1.98E-11   | 0.18466298 | 0.01185795 | 0.08415224 | 0.25476251 |
| 0.5450443  | 1.05E-15   | 0.41186751 | 5.72E-09   | 0.17809164 | 0.0152953  |
| 0.33425185 | 3.32E-06   | 0.05698825 | 0.44100531 | 0.15407922 | 0.03625814 |
| 0.22210264 | 0.00237767 | 0.02871495 | 0.69801726 | -0.0614186 | 0.40625324 |
| 0.34614563 | 1.39E-06   | 0.20071079 | 0.0061553  | -0.0539016 | 0.46618426 |
| 0.67702846 | 3.72E-26   | 0.37457122 | 1.50E-07   | 0.14722388 | 0.04552192 |
| 0.49982438 | 4.38E-13   | 0.23019198 | 0.00162062 | 0.13112688 | 0.07522013 |
| 0.50392454 | 2.63E-13   | 0.24582052 | 0.00074418 | 0.03835366 | 0.60423424 |
| 0.47012248 | 1.46E-11   | 0.21485856 | 0.00331442 | 0.22315019 | 0.0022642  |
| 0.69064105 | 1.49E-27   | 0.3634193  | 3.69E-07   | 0.12936885 | 0.07924853 |
| -0.4137227 | 4.81E-09   | -0.1717335 | 0.01941899 | -0.2179748 | 0.00287678 |
| 0.49181885 | 1.17E-12   | 0.20250114 | 0.00570374 | 0.20598216 | 0.0049097  |
| 0.56538799 | 5.09E-17   | 0.28228469 | 9.90E-05   | 0.06602116 | 0.37192512 |

|            |            |            |            |            |            |
|------------|------------|------------|------------|------------|------------|
| -0.366186  | 2.96E-07   | -0.1910966 | 0.00917041 | -0.2055697 | 0.0049983  |
| 0.44948172 | 1.38E-10   | 0.22337528 | 0.00224048 | -0.0381342 | 0.60630641 |
| 0.33287938 | 3.66E-06   | 0.15308587 | 0.03749267 | 0.17944003 | 0.01452639 |
| 0.36252211 | 3.96E-07   | 0.17843408 | 0.01509673 | 0.06065956 | 0.41208918 |
| 0.46272576 | 3.33E-11   | 0.31189351 | 1.55E-05   | 0.05946803 | 0.42134945 |
| 0.53649125 | 3.52E-15   | 0.24282236 | 0.00086739 | 0.06534031 | 0.37688766 |
| 0.42158946 | 2.28E-09   | 0.22087851 | 0.00251679 | 0.07747451 | 0.29454588 |
| 0.36165226 | 4.24E-07   | 0.14601762 | 0.04734111 | 0.09118074 | 0.21706904 |
| 0.24576911 | 0.00074615 | 0.11801443 | 0.10962385 | 0.1258829  | 0.0877503  |
| 0.66792098 | 2.92E-25   | 0.37506748 | 1.44E-07   | 0.16302567 | 0.02660846 |
| 0.40941938 | 7.18E-09   | 0.19001705 | 0.00957975 | 0.1214796  | 0.09951522 |
| 0.33835082 | 2.47E-06   | 0.16287209 | 0.0267534  | 0.08351551 | 0.25838764 |
| -0.4545789 | 8.04E-11   | -0.4351539 | 6.02E-10   | -0.156412  | 0.03349349 |
| 0.21415037 | 0.00342191 | 0.11966676 | 0.10470757 | 0.12540623 | 0.08896754 |
| 0.42397588 | 1.81E-09   | 0.20597711 | 0.00491077 | 0.1398076  | 0.05769176 |
| 0.66226314 | 1.01E-24   | 0.34124561 | 2.00E-06   | 0.12525312 | 0.08936137 |
| 0.67884482 | 2.45E-26   | 0.43210363 | 8.17E-10   | 0.19614764 | 0.00745382 |
| 0.43529405 | 5.94E-10   | 0.19671295 | 0.00728072 | 0.22253837 | 0.00232986 |
| 0.4069039  | 9.05E-09   | 0.17482117 | 0.01730951 | 0.01783435 | 0.80959507 |
| 0.46877768 | 1.70E-11   | 0.11325503 | 0.12479932 | 0.07477228 | 0.31175965 |
| 0.35615845 | 6.51E-07   | 0.10600138 | 0.15098765 | 0.11105482 | 0.13234212 |
| 0.31618459 | 1.16E-05   | 0.07794582 | 0.2916095  | 0.01312468 | 0.85926287 |
| 0.28495551 | 8.45E-05   | 0.24033779 | 0.00098343 | 0.07475543 | 0.31186902 |
| -0.3044442 | 2.52E-05   | -0.1477834 | 0.04469808 | -0.1974426 | 0.00706257 |
| 0.16792924 | 0.02232141 | 0.11501251 | 0.11901673 | 0.13174812 | 0.07383688 |
| 0.49042315 | 1.38E-12   | 0.18384785 | 0.01224367 | 0.19474539 | 0.0078991  |
| -0.3627971 | 3.87E-07   | -0.2140674 | 0.0034347  | -0.086426  | 0.24210413 |
| 0.57581535 | 9.96E-18   | 0.34253494 | 1.82E-06   | 0.09925244 | 0.1788997  |
| 0.47967534 | 4.91E-12   | 0.17872522 | 0.01492968 | 0.12642752 | 0.08637591 |
| -0.2815628 | 0.00010336 | -0.2063033 | 0.0048417  | -0.1746561 | 0.01741702 |
| -0.3076737 | 2.04E-05   | -0.2065925 | 0.00478118 | 0.02312009 | 0.75475362 |
| 0.40444467 | 1.13E-08   | 0.23774565 | 0.00111954 | 0.28752308 | 7.24E-05   |
| 0.59484418 | 4.34E-19   | 0.27811735 | 0.00012656 | 0.17490899 | 0.01725254 |
| 0.26035575 | 0.00034472 | 0.09854455 | 0.1820346  | 0.12608286 | 0.08724367 |
| 0.33637095 | 2.85E-06   | 0.10736423 | 0.14577406 | 0.14421604 | 0.05017071 |
| 0.3071706  | 2.11E-05   | 0.13615314 | 0.06461015 | 0.09717971 | 0.18819249 |
| 0.23151618 | 0.00152015 | 0.08453729 | 0.25258744 | 0.16981735 | 0.02083722 |
| 0.45566124 | 7.16E-11   | 0.22255347 | 0.00232822 | 0.19140432 | 0.0090566  |
| 0.45926007 | 4.86E-11   | 0.11618773 | 0.11526764 | 0.13852585 | 0.06004526 |
| 0.34646435 | 1.36E-06   | 0.09908395 | 0.17964225 | -0.0420326 | 0.56997934 |
| 0.42864924 | 1.15E-09   | 0.07360818 | 0.31937401 | 0.15371007 | 0.03671284 |
| 0.3626057  | 3.93E-07   | 0.14539608 | 0.04830189 | 0.08357631 | 0.25803999 |
| 0.23676582 | 0.00117534 | 0.01695803 | 0.81878554 | 0.25839615 | 0.00038341 |
| 0.28991746 | 6.26E-05   | 0.05380021 | 0.46702435 | 0.2111869  | 0.00390667 |
| 0.60120966 | 1.45E-19   | 0.43375396 | 6.93E-10   | 0.0148598  | 0.84088915 |
| 0.45192813 | 1.07E-10   | 0.17283269 | 0.01864379 | 0.1770661  | 0.01590367 |

|            |            |            |            |            |            |
|------------|------------|------------|------------|------------|------------|
| 0.34794178 | 1.22E-06   | 0.09594172 | 0.19390873 | -0.0491635 | 0.50632802 |
| 0.19959731 | 0.00645199 | 0.0119259  | 0.87200195 | 0.12355237 | 0.09383035 |
| 0.23006773 | 0.00163036 | 0.1069005  | 0.1475325  | 0.1754472  | 0.01690699 |
| 0.59774338 | 2.64E-19   | 0.4876508  | 1.92E-12   | 0.11415774 | 0.12180261 |
| 0.28220189 | 9.95E-05   | 0.15030699 | 0.04113607 | 0.08635172 | 0.24251078 |
| 0.41198332 | 5.66E-09   | 0.23309152 | 0.00140804 | 0.06934451 | 0.34828338 |
| 0.28294526 | 9.52E-05   | 0.03436276 | 0.64239461 | 0.01684428 | 0.81998033 |
| 0.57941391 | 5.59E-18   | 0.42260777 | 2.07E-09   | 0.22623989 | 0.00195761 |
| 0.22690132 | 0.0018971  | 0.05687802 | 0.44189097 | 0.06621098 | 0.37054877 |
