# Supplementary material for: Down-Regulation of Insulin Like Growth Factor 1 Involved in Alzheimer's Disease via MAPK, Ras, and FoxO Signaling Pathways
Source: PubMed Central journal article supplement (PMC9096571; doi:10.1155/2022/8169981), 2022-05-04
Supplement: 8169981.f3.pdf [file 8169981.f3.pdf]

## MAPK\_genes

| PCC         | Gene.symb | VEGFB        | TNFRSF1A     | TGFB3        | STK3         |
|-------------|-----------|--------------|--------------|--------------|--------------|
| 51.21325635 | PPP3CB    | -0.746511391 | -0.750550294 | -0.73715911  | -0.637183716 |
| 51.03983217 | PAK1      | -0.697228619 | -0.743502262 | -0.76122483  | -0.706622161 |
| 50.96263013 | PRKCB     | -0.689738457 | -0.733684119 | -0.759813553 | -0.563065519 |
| 50.13050038 | MAP2K1    | -0.612322566 | -0.68065422  | -0.723242824 | -0.543363494 |
| 49.9529     | MAP2K4    | -0.666933372 | -0.697651062 | -0.73241601  | -0.58396974  |
| 49.54982906 | BRAF      | -0.606096164 | -0.750400812 | -0.724306948 | -0.473672896 |
| 49.05815507 | CACNA2C   | -0.761580777 | -0.763648959 | -0.729307045 | -0.528912236 |
| 48.71918091 | MAPKAP1   | 0.647125366  | 0.716167949  | 0.72958075   | 0.409254419  |
| 48.71475669 | RASA1     | -0.60883811  | -0.702376036 | -0.731340143 | -0.39502695  |
| 48.46468028 | MAPK9     | -0.56368769  | -0.705524485 | -0.712430861 | -0.580980102 |
| 48.39576275 | PDGFRB    | 0.688908431  | 0.730297093  | 0.645157606  | 0.635085121  |
| 47.69240613 | GNA12     | 0.710710614  | 0.736656752  | 0.672947789  | 0.680474357  |
| 47.12805511 | RAPGEF2   | -0.540278869 | -0.645360989 | -0.725061448 | -0.354589315 |
| 46.67733357 | PPP3CA    | -0.533921002 | -0.671667425 | -0.6921142   | -0.417615427 |
| 46.21744257 | AKT1      | 0.570498577  | 0.672857974  | 0.696310575  | 0.47179211   |
| 46.14072209 | CACNB2    | -0.692029844 | -0.650171935 | -0.687755346 | -0.565378394 |
| 46.12035778 | KITLG     | -0.554415335 | -0.650219992 | -0.747276559 | -0.416693417 |
| 45.27312879 | MECOM     | 0.578479305  | 0.734376213  | 0.58968412   | 0.592976285  |
| 45.21117001 | PPP3R1    | -0.711079349 | -0.711486006 | -0.644161708 | -0.48997824  |
| 45.17908892 | MAP3K11   | 0.563750452  | 0.664252141  | 0.772169958  | 0.378651418  |
| 45.05743947 | MAPK10    | -0.407247249 | -0.634018634 | -0.651069534 | -0.535725506 |
| 45.05644011 | MAPK8     | -0.777053467 | -0.74404825  | -0.681128549 | -0.592097882 |
| 44.74899075 | BDNF      | -0.670095256 | -0.690765114 | -0.65875316  | -0.556595119 |
| 44.63081796 | NLK       | -0.695118169 | -0.726114152 | -0.673496393 | -0.536507081 |
| 44.43469911 | RASGRP1   | -0.676077715 | -0.711295464 | -0.643684374 | -0.420020081 |
| 44.39439423 | PDGFD     | -0.59154751  | -0.672354394 | -0.725757267 | -0.529844413 |
| 44.36807343 | TNFRSF1A  | 0.605008167  | 1            | 0.607388987  | 0.673690067  |
| 43.8465017  | RPS6KA1   | 0.493048246  | 0.64949409   | 0.694812629  | 0.44426527   |
| 43.79379389 | PRKACB    | -0.531407256 | -0.681088292 | -0.650046856 | -0.462126358 |
| 43.32635753 | MEF2C     | -0.762274045 | -0.669299427 | -0.742691117 | -0.60669179  |
| 43.20119331 | TGFB3     | 0.625767554  | 0.607388987  | 1            | 0.514475957  |
| 43.02589423 | MAPK13    | -0.696841323 | -0.623483439 | -0.632969789 | -0.529284405 |
| 42.93146498 | NFKB1     | 0.473123086  | 0.678737911  | 0.585607024  | 0.680189043  |
| 42.31966561 | MAPK1     | -0.714212087 | -0.718651924 | -0.65087028  | -0.601693801 |
| 42.11794942 | CSF1R     | 0.641252713  | 0.696267568  | 0.579638875  | 0.579142435  |
| 41.73279516 | IGF1      | -0.554759631 | -0.673005197 | -0.688715863 | -0.422469619 |
| 41.67826043 | NFATC3    | 0.484557496  | 0.504161416  | 0.649104823  | 0.35356857   |

|             |         |              |              |              |              |
|-------------|---------|--------------|--------------|--------------|--------------|
| 41.47085249 | MAP4K3  | -0.37576389  | -0.571467517 | -0.638389261 | -0.2851745   |
| 40.94267628 | MAP4K4  | 0.649547853  | 0.54575889   | 0.838183552  | 0.512397688  |
| 40.16399845 | KIT     | -0.666625572 | -0.630618608 | -0.650274149 | -0.535600385 |
| 39.47490645 | HSPB1   | 0.490045     | 0.773436424  | 0.567577582  | 0.53338214   |
| 39.04665603 | PPM1A   | -0.270774309 | -0.586777438 | -0.54513592  | -0.219908584 |
| 38.40625922 | MAPT    | -0.568017291 | -0.499828995 | -0.520659133 | -0.586329037 |
| 38.29910071 | KRAS    | -0.328894392 | -0.553419478 | -0.469320622 | -0.485789551 |
| 38.22025899 | VEGFB   | 1            | 0.605008167  | 0.625767554  | 0.530604096  |
| 38.16946338 | MAP4K2  | 0.432009095  | 0.407763487  | 0.581610295  | 0.364430104  |
| 37.28549456 | CACNB4  | -0.738475719 | -0.590883015 | -0.605026066 | -0.539711916 |
| 36.63104924 | LAMTOR2 | -0.275826239 | -0.459874497 | -0.543628445 | -0.146531413 |
| 36.45170728 | FGFR3   | 0.408242805  | 0.396922004  | 0.486134017  | 0.373745885  |
| 36.32286543 | MAPK14  | 0.398574618  | 0.396573803  | 0.522220536  | 0.252670984  |
| 34.62438369 | MAP3K5  | 0.333605066  | 0.566812865  | 0.344540212  | 0.442813056  |
| 34.47858877 | CACNA1C | -0.574995769 | -0.452079348 | -0.625418649 | -0.33730996  |
| 34.31265689 | STK3    | 0.530604096  | 0.673690067  | 0.514475957  | 1            |
| 34.24026191 | CDC25B  | 0.324141934  | 0.567476569  | 0.501875875  | 0.209982303  |
| 33.63514466 | EFNA1   | 0.247239466  | 0.659908704  | 0.582175555  | 0.672927895  |
| 32.60690735 | FGF9    | -0.723282185 | -0.557584815 | -0.546375915 | -0.497128138 |
| 32.51662069 | DAXX    | 0.425233154  | 0.504239464  | 0.513771995  | 0.093254778  |
| 32.32896066 | FGF1    | 0.558356209  | 0.423313778  | 0.670847242  | 0.387697707  |
| 31.41870434 | MET     | -0.447459861 | -0.565173646 | -0.504178341 | -0.592368526 |
| 31.16721424 | FLNB    | 0.358467906  | 0.460959238  | 0.576749946  | 0.370615197  |
| 29.95711187 | ANGPT2  | 0.407808201  | 0.616523499  | 0.402463534  | 0.544157388  |
| 29.93582246 | MAPK3   | 0.319212803  | 0.366746155  | 0.425317007  | 0.228133382  |
| 29.68905122 | CACNB1  | -0.595080599 | -0.510236741 | -0.398056145 | -0.629075941 |
| 29.44999021 | RAF1    | 0.249246938  | 0.444414919  | 0.39222197   | 0.534680131  |
| 29.14073729 | HSPA8   | -0.076052657 | -0.267977528 | -0.384012714 | -0.099656718 |
| 28.39430039 | ELK1    | 0.12252351   | 0.420740675  | 0.298470448  | 0.239984574  |
| 27.17595572 | CACNA1I | 0.06608007   | 0.261551963  | 0.329449888  | 0.191565881  |
| 25.91287858 | DUSP8   | 0.281766802  | 0.449219564  | 0.250742674  | 0.073079994  |
| 25.72920645 | DUSP3   | 0.084446149  | 0.27284528   | 0.358683136  | 0.109138818  |
| 25.34129412 | FGF2    | 0.475037527  | 0.571814025  | 0.255055534  | 0.722301227  |
| 24.92538031 | CRK     | 0.512325013  | 0.437177117  | 0.313678451  | 0.276055014  |
| 22.93357098 | CD14    | 0.274314659  | 0.641791789  | 0.233859527  | 0.478535431  |
| 18.98546667 | HSPA1A  | 0.278751111  | 0.428260542  | 0.290218464  | 0.445948181  |
| 18.53935834 | DUSP1   | 0.207905257  | 0.437521843  | 0.165430101  | 0.30629765   |

| RPS6KA1      | RASGRP1      | RASA1        | RAPGEF2      | RAF1         | PRKCB        |
|--------------|--------------|--------------|--------------|--------------|--------------|
| -0.723344726 | 0.819802692  | 0.8674229    | 0.827649573  | -0.474050613 | 0.938464299  |
| -0.714262918 | 0.774124929  | 0.828046666  | 0.786526713  | -0.573600699 | 0.912433154  |
| -0.797859716 | 0.799101651  | 0.897049191  | 0.896004804  | -0.442341262 | 1            |
| -0.782121604 | 0.749388607  | 0.910376528  | 0.891819745  | -0.45740358  | 0.943185559  |
| -0.763179183 | 0.771336908  | 0.877835864  | 0.887598564  | -0.416441756 | 0.955174208  |
| -0.779649057 | 0.758747708  | 0.90544797   | 0.884025167  | -0.381486364 | 0.881169653  |
| -0.690150395 | 0.860747139  | 0.854476305  | 0.817010354  | -0.359960835 | 0.891841254  |
| 0.824772578  | -0.796648516 | -0.903548419 | -0.870323791 | 0.373452094  | -0.90013872  |
| -0.765175745 | 0.773831605  | 1            | 0.915715478  | -0.366000142 | 0.897049191  |
| -0.750635256 | 0.651027697  | 0.855575279  | 0.834440526  | -0.509499074 | 0.886592296  |
| 0.652650417  | -0.748906147 | -0.747662089 | -0.712479115 | 0.647218952  | -0.836595925 |
| 0.651569824  | -0.732625983 | -0.763878046 | -0.71675601  | 0.565926497  | -0.843818848 |
| -0.768541654 | 0.74696292   | 0.915715478  | 1            | -0.308632737 | 0.896004804  |
| -0.737869471 | 0.798580551  | 0.816134209  | 0.860923724  | -0.465747313 | 0.842462836  |
| 0.759445861  | -0.686438422 | -0.80770624  | -0.802801034 | 0.376527303  | -0.783871547 |
| -0.63213766  | 0.755388804  | 0.761978877  | 0.747569249  | -0.489892948 | 0.838011216  |
| -0.714598562 | 0.708400679  | 0.848514225  | 0.86370344   | -0.371733371 | 0.812641854  |
| 0.652571694  | -0.71238726  | -0.705559477 | -0.689164695 | 0.541012325  | -0.824901649 |
| -0.672991293 | 0.784386727  | 0.759679282  | 0.738725306  | -0.376371249 | 0.862427974  |
| 0.806531772  | -0.682832371 | -0.855853818 | -0.846588744 | 0.309829331  | -0.826426195 |
| -0.789635437 | 0.588118119  | 0.782217466  | 0.803108683  | -0.482758782 | 0.838608054  |
| -0.596451632 | 0.791015328  | 0.729436637  | 0.689183796  | -0.343282858 | 0.795745929  |
| -0.64374242  | 0.753402874  | 0.731967876  | 0.683472164  | -0.420377542 | 0.782022591  |
| -0.58911736  | 0.836394659  | 0.707419541  | 0.715630593  | -0.398807192 | 0.75819189   |
| -0.608349528 | 1            | 0.773831605  | 0.74696292   | -0.305999367 | 0.799101651  |
| -0.623162758 | 0.615185112  | 0.723755199  | 0.689381157  | -0.459816724 | 0.735799243  |
| 0.64949409   | -0.711295464 | -0.702376036 | -0.645360989 | 0.444414919  | -0.733684119 |
| 1            | -0.608349528 | -0.765175745 | -0.768541654 | 0.34414722   | -0.797859716 |
| -0.658287211 | 0.576147957  | 0.79006557   | 0.71189816   | -0.531425787 | 0.742066617  |
| -0.637909505 | 0.700211865  | 0.722368783  | 0.691475805  | -0.299114874 | 0.80850705   |
| 0.694812629  | -0.643684374 | -0.731340143 | -0.725061448 | 0.39222197   | -0.759813553 |
| -0.553611233 | 0.750184402  | 0.73888151   | 0.734681731  | -0.264363153 | 0.830422416  |
| 0.634625161  | -0.579984083 | -0.635967566 | -0.574657216 | 0.765239677  | -0.720291591 |
| -0.495179473 | 0.756808462  | 0.665266851  | 0.614672352  | -0.403722825 | 0.742306262  |
| 0.732933603  | -0.672285372 | -0.640099069 | -0.613140288 | 0.385526605  | -0.724090342 |
| -0.546048826 | 0.722824674  | 0.684512891  | 0.680938167  | -0.366943766 | 0.684401376  |
| 0.74954637   | -0.627501881 | -0.782677987 | -0.773925585 | 0.337418466  | -0.78948526  |

|              |              |              |              |              |              |
|--------------|--------------|--------------|--------------|--------------|--------------|
| -0.718100005 | 0.559322677  | 0.83391627   | 0.830509924  | -0.350434144 | 0.766021787  |
| 0.602000643  | -0.64031557  | -0.639440986 | -0.634154731 | 0.45030224   | -0.686019617 |
| -0.514139308 | 0.656112776  | 0.606483492  | 0.57400675   | -0.376842267 | 0.692802027  |
| 0.467330993  | -0.605113691 | -0.643332437 | -0.544074302 | 0.563357825  | -0.606371947 |
| -0.709799704 | 0.529270554  | 0.763731764  | 0.805046021  | -0.336108823 | 0.678870752  |
| -0.598033974 | 0.615896311  | 0.619815938  | 0.588299516  | -0.386679169 | 0.760024875  |
| -0.607643721 | 0.495825727  | 0.636406226  | 0.659134121  | -0.575310897 | 0.679045504  |
| 0.493048246  | -0.676077715 | -0.60883811  | -0.540278869 | 0.249246938  | -0.689738457 |
| 0.747298069  | -0.475838274 | -0.654542551 | -0.681786085 | 0.390350158  | -0.689510008 |
| -0.555369322 | 0.573235476  | 0.593244799  | 0.584663136  | -0.242555619 | 0.657185835  |
| -0.753201894 | 0.469927417  | 0.788289246  | 0.770722853  | -0.217043894 | 0.696852595  |
| 0.532632024  | -0.52982231  | -0.670335614 | -0.723105505 | 0.293460283  | -0.718034286 |
| 0.76870077   | -0.520434754 | -0.716597374 | -0.696557851 | 0.211619246  | -0.721240948 |
| 0.386992043  | -0.582624006 | -0.546905909 | -0.516069561 | 0.455415546  | -0.572985288 |
| -0.563348165 | 0.653332157  | 0.550584145  | 0.630028207  | -0.091140033 | 0.670299029  |
| 0.44426527   | -0.420020081 | -0.39502695  | -0.354589315 | 0.534680131  | -0.563065519 |
| 0.611421616  | -0.488514151 | -0.662614811 | -0.658460503 | 0.24340573   | -0.558740675 |
| 0.545065877  | -0.376021495 | -0.478096766 | -0.496008075 | 0.448945817  | -0.579396077 |
| -0.341232813 | 0.564270711  | 0.429070775  | 0.382161912  | -0.310968249 | 0.549061655  |
| 0.548437767  | -0.566754898 | -0.689260935 | -0.60482299  | 0.204719575  | -0.556284094 |
| 0.447068702  | -0.549982354 | -0.540994005 | -0.58805546  | 0.114500517  | -0.577907549 |
| -0.301682188 | 0.382033391  | 0.384130562  | 0.42645465   | -0.463950052 | 0.462161965  |
| 0.400999238  | -0.459316471 | -0.482220445 | -0.551807397 | 0.338303143  | -0.583153981 |
| 0.489994857  | -0.419791433 | -0.356319111 | -0.285959854 | 0.487776759  | -0.430878761 |
| 0.585551543  | -0.386372394 | -0.528875575 | -0.523680173 | 0.32045941   | -0.538319706 |
| -0.250715164 | 0.507467601  | 0.346273259  | 0.22930008   | -0.51057175  | 0.482172179  |
| 0.34414722   | -0.305999367 | -0.366000142 | -0.308632737 | 1            | -0.442341262 |
| -0.603125485 | 0.282193388  | 0.576173214  | 0.632863213  | -0.157578933 | 0.520062298  |
| 0.556801539  | -0.335093682 | -0.518323143 | -0.416375964 | 0.486365271  | -0.425646353 |
| 0.521733773  | -0.21081325  | -0.514478104 | -0.484090475 | 0.410824366  | -0.416566098 |
| 0.290787194  | -0.533872168 | -0.531735086 | -0.411561016 | 0.265840199  | -0.357310962 |
| 0.521415569  | -0.251321105 | -0.551707626 | -0.500327647 | 0.315601463  | -0.432823181 |
| 0.132401709  | -0.354201356 | -0.240824786 | -0.181762413 | 0.413181517  | -0.367740128 |
| 0.270567235  | -0.508232748 | -0.36312805  | -0.291444441 | 0.462438642  | -0.417785536 |
| 0.454939051  | -0.389452971 | -0.254331903 | -0.259965438 | 0.169213517  | -0.325962197 |
| 0.115544224  | -0.196998892 | -0.217524371 | -0.119562882 | 0.523189052  | -0.234529645 |
| 0.207998167  | -0.317764316 | -0.22536087  | -0.189812308 | 0.32489886   | -0.240108512 |

| PRKACB       | PPP3R1       | PPP3CB       | PPP3CA       | PPM1A        | PDGFRB       |
|--------------|--------------|--------------|--------------|--------------|--------------|
| 0.733207848  | 0.853402389  | 1            | 0.776899805  | 0.632148118  | -0.879315133 |
| 0.760968746  | 0.825634854  | 0.953291023  | 0.778094464  | 0.606688389  | -0.886177268 |
| 0.742066617  | 0.862427974  | 0.938464299  | 0.842462836  | 0.678870752  | -0.836595925 |
| 0.801373186  | 0.785074861  | 0.919952603  | 0.806054382  | 0.730979188  | -0.816833531 |
| 0.753352802  | 0.782618129  | 0.932770142  | 0.798646706  | 0.693573312  | -0.817949975 |
| 0.820602184  | 0.758157455  | 0.866750025  | 0.803893504  | 0.752607657  | -0.763736432 |
| 0.68116253   | 0.850387109  | 0.92027585   | 0.801469487  | 0.624737649  | -0.830440534 |
| -0.715200463 | -0.814987744 | -0.833869914 | -0.846600098 | -0.69818157  | 0.755458783  |
| 0.79006557   | 0.759679282  | 0.8674229    | 0.816134209  | 0.763731764  | -0.747662089 |
| 0.849228528  | 0.693724307  | 0.863174895  | 0.745594052  | 0.749278729  | -0.779767601 |
| -0.719580826 | -0.804280274 | -0.879315133 | -0.776516936 | -0.586682259 | 1            |
| -0.709909851 | -0.752955566 | -0.858469738 | -0.76252299  | -0.519188156 | 0.843424386  |
| 0.71189816   | 0.738725306  | 0.827649573  | 0.860923724  | 0.805046021  | -0.712479115 |
| 0.637850168  | 0.757110955  | 0.776899805  | 1            | 0.72308182   | -0.776516936 |
| -0.783023741 | -0.633579376 | -0.788245725 | -0.764159329 | -0.728592013 | 0.747658445  |
| 0.573228948  | 0.809561875  | 0.897937717  | 0.757505145  | 0.531114695  | -0.832420974 |
| 0.741054491  | 0.651865349  | 0.773890222  | 0.860176725  | 0.716949625  | -0.723604666 |
| -0.614604982 | -0.748835176 | -0.817488809 | -0.720245035 | -0.545134126 | 0.83377568   |
| 0.565779536  | 1            | 0.853402389  | 0.757110955  | 0.532836856  | -0.804280274 |
| -0.710386707 | -0.674537145 | -0.764098037 | -0.758822664 | -0.68045932  | 0.64888198   |
| 0.7345614    | 0.642345018  | 0.802783944  | 0.699029001  | 0.771023778  | -0.697663702 |
| 0.602126368  | 0.812483299  | 0.862013536  | 0.674836859  | 0.490968015  | -0.757561789 |
| 0.613458895  | 0.732793794  | 0.818332212  | 0.686941199  | 0.470374315  | -0.761597111 |
| 0.517912981  | 0.772726509  | 0.809690215  | 0.851756794  | 0.483416646  | -0.791904934 |
| 0.576147957  | 0.784386727  | 0.819802692  | 0.798580551  | 0.529270554  | -0.748906147 |
| 0.716018949  | 0.60239218   | 0.777935552  | 0.644464217  | 0.574856093  | -0.738719451 |
| -0.681088292 | -0.711486006 | -0.750550294 | -0.671667425 | -0.586777438 | 0.730297093  |
| -0.658287211 | -0.672991293 | -0.723344726 | -0.737869471 | -0.709799704 | 0.652650417  |
| 1            | 0.565779536  | 0.733207848  | 0.637850168  | 0.710889859  | -0.719580826 |
| 0.613475559  | 0.7124386    | 0.819213715  | 0.650428147  | 0.457493754  | -0.68606949  |
| -0.650046856 | -0.644161708 | -0.73715911  | -0.6921142   | -0.54513592  | 0.645157606  |
| 0.501656926  | 0.813023883  | 0.837424917  | 0.681710304  | 0.420652819  | -0.737316884 |
| -0.66195976  | -0.665694146 | -0.766798665 | -0.678859297 | -0.560375896 | 0.784478661  |
| 0.50877803   | 0.760564616  | 0.818401554  | 0.62148761   | 0.405185837  | -0.774504894 |
| -0.55957313  | -0.703358057 | -0.776199888 | -0.643444166 | -0.488017477 | 0.757846038  |
| 0.61918547   | 0.592264865  | 0.704384465  | 0.739535024  | 0.549269097  | -0.676277585 |
| -0.673712552 | -0.588194727 | -0.698891237 | -0.732887887 | -0.648399209 | 0.596675634  |

|              |              |              |              |              |              |
|--------------|--------------|--------------|--------------|--------------|--------------|
| 0.832098178  | 0.547816718  | 0.690390178  | 0.683621997  | 0.783655482  | -0.582390207 |
| -0.480912185 | -0.652808717 | -0.721254846 | -0.689390355 | -0.440806272 | 0.700783068  |
| 0.560331543  | 0.618243668  | 0.73862228   | 0.611545486  | 0.376083453  | -0.72482854  |
| -0.714929267 | -0.556433629 | -0.64992345  | -0.551217254 | -0.490594582 | 0.634205604  |
| 0.710889859  | 0.532836856  | 0.632148118  | 0.72308182   | 1            | -0.586682259 |
| 0.50594361   | 0.676725139  | 0.77230856   | 0.552800633  | 0.402379135  | -0.673743441 |
| 0.54446556   | 0.555026742  | 0.666982979  | 0.611747452  | 0.5912117    | -0.665623174 |
| -0.531407256 | -0.711079349 | -0.746511391 | -0.533921002 | -0.270774309 | 0.688908431  |
| -0.679909329 | -0.543024859 | -0.633211514 | -0.666687168 | -0.657806882 | 0.629498887  |
| 0.561180024  | 0.514814779  | 0.693394112  | 0.519623559  | 0.372406162  | -0.602824851 |
| 0.700473396  | 0.487971577  | 0.602721672  | 0.603385834  | 0.795104434  | -0.476256387 |
| -0.562480362 | -0.552755118 | -0.677754539 | -0.647030947 | -0.545649431 | 0.628309413  |
| -0.610002179 | -0.536599154 | -0.605684415 | -0.628987878 | -0.573768867 | 0.498807308  |
| -0.474374771 | -0.583071916 | -0.629575897 | -0.561531413 | -0.436288771 | 0.637211958  |
| 0.315720691  | 0.671199125  | 0.638740613  | 0.629257355  | 0.402965642  | -0.555880503 |
| -0.462126358 | -0.48997824  | -0.637183716 | -0.417615427 | -0.219908584 | 0.635085121  |
| -0.606756242 | -0.457406329 | -0.516642349 | -0.572859173 | -0.624661043 | 0.482640596  |
| -0.477299232 | -0.435105978 | -0.58486429  | -0.461051    | -0.447856327 | 0.505093266  |
| 0.337081729  | 0.6436427    | 0.628955014  | 0.463344764  | 0.182784153  | -0.585704974 |
| -0.475261341 | -0.532036235 | -0.514332875 | -0.5857574   | -0.51443786  | 0.486233421  |
| -0.261760672 | -0.527644497 | -0.612251161 | -0.550427283 | -0.317712235 | 0.481001345  |
| 0.424459901  | 0.463824845  | 0.571804876  | 0.48834608   | 0.361362694  | -0.606753502 |
| -0.399310142 | -0.459353352 | -0.562865042 | -0.543421369 | -0.430809979 | 0.540653112  |
| -0.451091724 | -0.483495224 | -0.524953264 | -0.360218684 | -0.352214255 | 0.576522961  |
| -0.616811318 | -0.368252702 | -0.456634487 | -0.52181912  | -0.565115107 | 0.441166356  |
| 0.308509666  | 0.561122221  | 0.610803039  | 0.338082112  | 0.051981034  | -0.621525043 |
| -0.531425787 | -0.376371249 | -0.474050613 | -0.465747313 | -0.336108823 | 0.647218952  |
| 0.547785429  | 0.258656884  | 0.430731271  | 0.469580156  | 0.686168621  | -0.363024897 |
| -0.621373258 | -0.285547208 | -0.393809551 | -0.436636647 | -0.532669224 | 0.436935246  |
| -0.605276935 | -0.208743139 | -0.372060009 | -0.431027171 | -0.525885176 | 0.379580997  |
| -0.448310072 | -0.452862953 | -0.408198777 | -0.488146932 | -0.476297252 | 0.501653357  |
| -0.601330756 | -0.315582866 | -0.331758807 | -0.466835139 | -0.607698317 | 0.331195022  |
| -0.335080393 | -0.394784206 | -0.509085524 | -0.235891338 | -0.101141808 | 0.516735454  |
| -0.304811331 | -0.500514483 | -0.425490764 | -0.476538106 | -0.186998558 | 0.575069291  |
| -0.233152292 | -0.349505764 | -0.395072071 | -0.312999849 | -0.320513489 | 0.360762603  |
| -0.43378169  | -0.244707611 | -0.30448604  | -0.139131492 | -0.178882263 | 0.310923597  |
| -0.223343193 | -0.326993888 | -0.258494873 | -0.360731493 | -0.184165677 | 0.43014162   |

| PDGFD        | PAK1         | NLK          | NFKB1        | NFATC3       | MET          |
|--------------|--------------|--------------|--------------|--------------|--------------|
| 0.777935552  | 0.953291023  | 0.809690215  | -0.766798665 | -0.698891237 | 0.571804876  |
| 0.777199535  | 1            | 0.795102214  | -0.810787632 | -0.703603027 | 0.59971707   |
| 0.735799243  | 0.912433154  | 0.75819189   | -0.720291591 | -0.78948526  | 0.462161965  |
| 0.748148812  | 0.908625801  | 0.682378961  | -0.714174104 | -0.812054178 | 0.417558221  |
| 0.750203226  | 0.920407706  | 0.724860336  | -0.682809147 | -0.776799859 | 0.486776663  |
| 0.758507552  | 0.857048067  | 0.738144451  | -0.640092676 | -0.766270968 | 0.470610347  |
| 0.717244329  | 0.876074206  | 0.838593748  | -0.669079061 | -0.662923014 | 0.544224916  |
| -0.702995881 | -0.810482358 | -0.728218229 | 0.649312032  | 0.85018517   | -0.330261913 |
| 0.723755199  | 0.828046666  | 0.707419541  | -0.635967566 | -0.782677987 | 0.384130562  |
| 0.733287652  | 0.877711058  | 0.623322479  | -0.711727794 | -0.738624352 | 0.486374325  |
| -0.738719451 | -0.886177268 | -0.791904934 | 0.784478661  | 0.596675634  | -0.606753502 |
| -0.723796317 | -0.901484531 | -0.773998748 | 0.744340696  | 0.670057674  | -0.572795039 |
| 0.689381157  | 0.786526713  | 0.715630593  | -0.574657216 | -0.773925585 | 0.42645465   |
| 0.644464217  | 0.778094464  | 0.851756794  | -0.678859297 | -0.732887887 | 0.48834608   |
| -0.766517191 | -0.802816398 | -0.703363972 | 0.620857693  | 0.70474365   | -0.472789939 |
| 0.677207892  | 0.860317304  | 0.813379341  | -0.715918612 | -0.602132534 | 0.605471739  |
| 0.776199434  | 0.758829917  | 0.768491899  | -0.593259506 | -0.716129668 | 0.545288347  |
| -0.692597633 | -0.824920557 | -0.706143522 | 0.712217799  | 0.612633081  | -0.475210619 |
| 0.60239218   | 0.825634854  | 0.772726509  | -0.665694146 | -0.588194727 | 0.463824845  |
| -0.680057715 | -0.714568861 | -0.64165602  | 0.545820762  | 0.7508516    | -0.350647284 |
| 0.651246008  | 0.808566233  | 0.539878712  | -0.720690936 | -0.736615727 | 0.380521762  |
| 0.673307032  | 0.841849726  | 0.79669062   | -0.632448814 | -0.557842283 | 0.528693939  |
| 0.702682071  | 0.802681367  | 0.742307787  | -0.602543024 | -0.582451338 | 0.545600364  |
| 0.67264093   | 0.795102214  | 1            | -0.648676026 | -0.510528035 | 0.664756427  |
| 0.615185112  | 0.774124929  | 0.836394659  | -0.579984083 | -0.627501881 | 0.382033391  |
| 1            | 0.777199535  | 0.67264093   | -0.649708749 | -0.612392277 | 0.58539749   |
| -0.672354394 | -0.743502262 | -0.726114152 | 0.678737911  | 0.504161416  | -0.565173646 |
| -0.623162758 | -0.714262918 | -0.58911736  | 0.634625161  | 0.74954637   | -0.301682188 |
| 0.716018949  | 0.760968746  | 0.517912981  | -0.66195976  | -0.673712552 | 0.424459901  |
| 0.64705849   | 0.801584317  | 0.704204473  | -0.587079468 | -0.602351693 | 0.494948356  |
| -0.725757267 | -0.76122483  | -0.673496393 | 0.585607024  | 0.649104823  | -0.504178341 |
| 0.611088681  | 0.811649757  | 0.74612476   | -0.516288548 | -0.573061827 | 0.492030366  |
| -0.649708749 | -0.810787632 | -0.648676026 | 1            | 0.575545434  | -0.545456408 |
| 0.680410942  | 0.787054702  | 0.795471049  | -0.623804392 | -0.455078184 | 0.592026739  |
| -0.618383861 | -0.75743694  | -0.716571926 | 0.621059976  | 0.510614169  | -0.526154739 |
| 0.759708493  | 0.688718663  | 0.771202111  | -0.558289584 | -0.576015771 | 0.565875168  |
| -0.612392277 | -0.703603027 | -0.510528035 | 0.575545434  | 1            | -0.17875448  |

|              |              |              |              |              |              |
|--------------|--------------|--------------|--------------|--------------|--------------|
| 0.642070909  | 0.693210213  | 0.470947052  | -0.530853662 | -0.770865222 | 0.254078752  |
| -0.670816376 | -0.709808763 | -0.754765045 | 0.616745925  | 0.518017408  | -0.601699883 |
| 0.731464282  | 0.731200789  | 0.724655356  | -0.532601566 | -0.501251816 | 0.560055186  |
| -0.643030466 | -0.691035229 | -0.576979296 | 0.672572897  | 0.503233138  | -0.489423591 |
| 0.574856093  | 0.606688389  | 0.483416646  | -0.560375896 | -0.648399209 | 0.361362694  |
| 0.507463151  | 0.799823132  | 0.55637728   | -0.632103514 | -0.625493029 | 0.288514554  |
| 0.524639313  | 0.645630136  | 0.494116136  | -0.636744938 | -0.591465404 | 0.353846984  |
| -0.59154751  | -0.697228619 | -0.695118169 | 0.473123086  | 0.484557496  | -0.447459861 |
| -0.607083649 | -0.673564904 | -0.475694459 | 0.578676254  | 0.72984235   | -0.253291323 |
| 0.588615118  | 0.641361026  | 0.617455296  | -0.484885331 | -0.491785686 | 0.490495793  |
| 0.537922645  | 0.540317601  | 0.321841397  | -0.447019744 | -0.727940712 | 0.124917904  |
| -0.516275669 | -0.682070089 | -0.515933913 | 0.445263635  | 0.588000214  | -0.363524781 |
| -0.502481047 | -0.597858919 | -0.375141191 | 0.442785401  | 0.889060536  | -0.009269763 |
| -0.532678    | -0.664330466 | -0.585410826 | 0.586801865  | 0.416868163  | -0.433475508 |
| 0.484418934  | 0.597524033  | 0.634303688  | -0.340216826 | -0.511782002 | 0.359679761  |
| -0.529844413 | -0.706622161 | -0.536507081 | 0.680189043  | 0.35356857   | -0.592368526 |
| -0.539111092 | -0.451562295 | -0.442024599 | 0.418358054  | 0.51049773   | -0.240103176 |
| -0.563659125 | -0.622671297 | -0.43178467  | 0.622594318  | 0.393434455  | -0.446416572 |
| 0.457040548  | 0.60738066   | 0.67955108   | -0.471561486 | -0.246718216 | 0.589732506  |
| -0.482037647 | -0.429278502 | -0.505294269 | 0.336896661  | 0.49419232   | -0.175757523 |
| -0.491147964 | -0.568286358 | -0.666599945 | 0.360535693  | 0.382378887  | -0.519453483 |
| 0.58539749   | 0.59971707   | 0.664756427  | -0.545456408 | -0.17875448  | 1            |
| -0.45764852  | -0.529824593 | -0.531817205 | 0.41259106   | 0.329409406  | -0.479719099 |
| -0.499560566 | -0.544529911 | -0.445602904 | 0.6315131    | 0.281689978  | -0.37750087  |
| -0.412574593 | -0.48975527  | -0.308540973 | 0.390133165  | 0.623165287  | -0.188732276 |
| 0.472529482  | 0.617545301  | 0.539908638  | -0.586306107 | -0.19372792  | 0.488280868  |
| -0.459816724 | -0.573600699 | -0.398807192 | 0.765239677  | 0.337418466  | -0.463950052 |
| 0.426717691  | 0.408588783  | 0.19743299   | -0.271567145 | -0.558311713 | 0.089779683  |
| -0.420364043 | -0.437120864 | -0.226706769 | 0.482441131  | 0.527152488  | -0.121573636 |
| -0.457871723 | -0.433332762 | -0.200163864 | 0.445482673  | 0.602932091  | -0.143020668 |
| -0.412496255 | -0.407437973 | -0.471896447 | 0.337622803  | 0.347062419  | -0.234762624 |
| -0.381701313 | -0.403225912 | -0.155283867 | 0.407184422  | 0.606634903  | 0.019527973  |
| -0.466336357 | -0.556752898 | -0.449836165 | 0.504691833  | 0.125862292  | -0.600388935 |
| -0.318955009 | -0.393415718 | -0.507140873 | 0.486622067  | 0.282320087  | -0.311082737 |
| -0.383573369 | -0.358606201 | -0.429963008 | 0.412074343  | 0.155908514  | -0.339073028 |
| -0.290336283 | -0.395975178 | -0.185068954 | 0.525932555  | 0.18019596   | -0.295504112 |
| -0.182794684 | -0.309140762 | -0.441667921 | 0.341507148  | 0.142090986  | -0.271933048 |



| MEF2C        | MECOM        | MAPT         | MAPKAPK2     | MAPK9        | MAPK8        |
|--------------|--------------|--------------|--------------|--------------|--------------|
| 0.819213715  | -0.817488809 | 0.77230856   | -0.833869914 | 0.863174895  | 0.862013536  |
| 0.801584317  | -0.824920557 | 0.799823132  | -0.810482358 | 0.877711058  | 0.841849726  |
| 0.80850705   | -0.824901649 | 0.760024875  | -0.90013872  | 0.886592296  | 0.795745929  |
| 0.739649693  | -0.767872574 | 0.728409273  | -0.870009306 | 0.940092956  | 0.72894455   |
| 0.790961643  | -0.800360673 | 0.772751783  | -0.839542811 | 0.922244758  | 0.759030112  |
| 0.710853111  | -0.710108621 | 0.584475579  | -0.880128269 | 0.884040511  | 0.766257458  |
| 0.832004552  | -0.763556244 | 0.697076868  | -0.849712605 | 0.753817163  | 0.8852259    |
| -0.70173476  | 0.754456009  | -0.647115024 | 1            | -0.778059823 | -0.744235093 |
| 0.722368783  | -0.705559477 | 0.619815938  | -0.903548419 | 0.855575279  | 0.729436637  |
| 0.705397168  | -0.718917852 | 0.644458311  | -0.778059823 | 1            | 0.669374071  |
| -0.68606949  | 0.83377568   | -0.673743441 | 0.755458783  | -0.779767601 | -0.757561789 |
| -0.724047201 | 0.807858107  | -0.716666113 | 0.773995901  | -0.818364783 | -0.748602517 |
| 0.691475805  | -0.689164695 | 0.588299516  | -0.870323791 | 0.834440526  | 0.689183796  |
| 0.650428147  | -0.720245035 | 0.552800633  | -0.846600098 | 0.745594052  | 0.674836859  |
| -0.666633605 | 0.64105004   | -0.534108629 | 0.762699197  | -0.858277378 | -0.655821843 |
| 0.728907508  | -0.758952285 | 0.718454698  | -0.756242674 | 0.686722536  | 0.836798216  |
| 0.65586354   | -0.643591756 | 0.459455053  | -0.796020668 | 0.79142886   | 0.651110677  |
| -0.65536262  | 1            | -0.701915238 | 0.754456009  | -0.718917852 | -0.694290027 |
| 0.7124386    | -0.748835176 | 0.676725139  | -0.814987744 | 0.693724307  | 0.812483299  |
| -0.702388265 | 0.628420638  | -0.46957372  | 0.855222174  | -0.764224123 | -0.658107249 |
| 0.608840854  | -0.713711645 | 0.665998305  | -0.757921866 | 0.887100248  | 0.602774749  |
| 0.790444499  | -0.694290027 | 0.684271977  | -0.744235093 | 0.669374071  | 1            |
| 0.722037163  | -0.69477614  | 0.590816654  | -0.73094696  | 0.72040973   | 0.739799585  |
| 0.704204473  | -0.706143522 | 0.55637728   | -0.728218229 | 0.623322479  | 0.79669062   |
| 0.700211865  | -0.71238726  | 0.615896311  | -0.796648516 | 0.651027697  | 0.791015328  |
| 0.64705849   | -0.692597633 | 0.507463151  | -0.702995881 | 0.733287652  | 0.673307032  |
| -0.669299427 | 0.734376213  | -0.499828995 | 0.716167949  | -0.705524485 | -0.74404825  |
| -0.637909505 | 0.652571694  | -0.598033974 | 0.824772578  | -0.750635256 | -0.596451632 |
| 0.613475559  | -0.614604982 | 0.50594361   | -0.715200463 | 0.849228528  | 0.602126368  |
| 1            | -0.65536262  | 0.671480188  | -0.70173476  | 0.705397168  | 0.790444499  |
| -0.742691117 | 0.58968412   | -0.520659133 | 0.72958075   | -0.712430861 | -0.681128549 |
| 0.753775498  | -0.708930992 | 0.712749716  | -0.746309027 | 0.679454064  | 0.787181591  |
| -0.587079468 | 0.712217799  | -0.632103514 | 0.649312032  | -0.711727794 | -0.632448814 |
| 0.751433218  | -0.740724238 | 0.623827056  | -0.658920631 | 0.558737524  | 0.850239276  |
| -0.690369084 | 0.69718438   | -0.640359575 | 0.653571955  | -0.68093095  | -0.710842293 |
| 0.588450804  | -0.605052241 | 0.394046194  | -0.686035347 | 0.640574638  | 0.652543205  |
| -0.602351693 | 0.612633081  | -0.625493029 | 0.85018517   | -0.738624352 | -0.557842283 |

|              |              |              |              |              |              |
|--------------|--------------|--------------|--------------|--------------|--------------|
| 0.529581     | -0.549861583 | 0.44957102   | -0.767486465 | 0.855708934  | 0.53149969   |
| -0.66847551  | 0.596009455  | -0.477559538 | 0.668525929  | -0.554429332 | -0.697165288 |
| 0.701923589  | -0.626043994 | 0.571872306  | -0.618403308 | 0.5967923    | 0.742154405  |
| -0.543070502 | 0.592849325  | -0.375826716 | 0.642052279  | -0.627206553 | -0.651075137 |
| 0.457493754  | -0.545134126 | 0.402379135  | -0.69818157  | 0.749278729  | 0.490968015  |
| 0.671480188  | -0.701915238 | 1            | -0.647115024 | 0.644458311  | 0.684271977  |
| 0.427847364  | -0.671629586 | 0.526661544  | -0.661636556 | 0.684502908  | 0.499454212  |
| -0.762274045 | 0.578479305  | -0.568017291 | 0.647125366  | -0.56368769  | -0.777053467 |
| -0.505260246 | 0.536921582  | -0.519806136 | 0.672885321  | -0.758788577 | -0.466618342 |
| 0.825798164  | -0.531286259 | 0.494624671  | -0.571484164 | 0.600940809  | 0.644233758  |
| 0.461746685  | -0.458447134 | 0.354916089  | -0.723285876 | 0.755007434  | 0.382049945  |
| -0.473312761 | 0.574826986  | -0.516746504 | 0.604527759  | -0.761451352 | -0.451981658 |
| -0.494580752 | 0.528417557  | -0.591031351 | 0.791190931  | -0.677773735 | -0.441224381 |
| -0.294230406 | 0.632911336  | -0.507710785 | 0.567400931  | -0.558212177 | -0.538915277 |
| 0.678302018  | -0.516613485 | 0.558684612  | -0.631372525 | 0.494217891  | 0.614878842  |
| -0.60669179  | 0.592976285  | -0.586329037 | 0.409254419  | -0.580980102 | -0.592097882 |
| -0.456041781 | 0.432861317  | -0.135929752 | 0.642912375  | -0.56565655  | -0.450836326 |
| -0.479762296 | 0.592314553  | -0.443391573 | 0.456773028  | -0.627676362 | -0.490932776 |
| 0.747838019  | -0.52730391  | 0.496687257  | -0.464725854 | 0.359636561  | 0.710732033  |
| -0.454529804 | 0.435795931  | -0.237104665 | 0.721782611  | -0.420293922 | -0.48179507  |
| -0.606416675 | 0.451140478  | -0.377082148 | 0.53119199   | -0.416606274 | -0.603914182 |
| 0.494948356  | -0.475210619 | 0.288514554  | -0.330261913 | 0.486374325  | 0.528693939  |
| -0.543655648 | 0.519331285  | -0.309308064 | 0.433815597  | -0.514297631 | -0.489254698 |
| -0.483161688 | 0.613725256  | -0.470965457 | 0.401478247  | -0.40654851  | -0.517644545 |
| -0.364211039 | 0.374999976  | -0.378517496 | 0.541988361  | -0.671587257 | -0.279742184 |
| 0.52943205   | -0.561851701 | 0.562106018  | -0.376321342 | 0.347180909  | 0.62943631   |
| -0.299114874 | 0.541012325  | -0.386679169 | 0.373452094  | -0.509499074 | -0.343282858 |
| 0.262507291  | -0.348773628 | 0.250206672  | -0.510119159 | 0.669652264  | 0.181289241  |
| -0.235865026 | 0.382790475  | -0.250696619 | 0.503944943  | -0.584059458 | -0.216056544 |
| -0.141037977 | 0.306935956  | -0.223035554 | 0.477196936  | -0.601339417 | -0.148674256 |
| -0.116715659 | 0.410331397  | -0.171351942 | 0.530175807  | -0.356684199 | -0.404883061 |
| -0.120846379 | 0.356173086  | -0.242431474 | 0.571227577  | -0.56674026  | -0.183274935 |
| -0.405169987 | 0.500699269  | -0.448129471 | 0.242142797  | -0.399040101 | -0.519007181 |
| -0.391025634 | 0.484024811  | -0.3393358   | 0.428163775  | -0.245178833 | -0.408570772 |
| -0.322875825 | 0.402829931  | -0.325815867 | 0.313170793  | -0.285243221 | -0.461037901 |
| -0.265254399 | 0.296248439  | -0.233631333 | 0.217899541  | -0.298268231 | -0.351052303 |
| -0.188356052 | 0.327166751  | -0.170251417 | 0.284251288  | -0.199121838 | -0.280893361 |

| MAPK3        | MAPK14       | MAPK13       | MAPK10       | MAPK1        | MAP4K4       |
|--------------|--------------|--------------|--------------|--------------|--------------|
| -0.456634487 | -0.605684415 | 0.837424917  | 0.802783944  | 0.818401554  | -0.721254846 |
| -0.48975527  | -0.597858919 | 0.811649757  | 0.808566233  | 0.787054702  | -0.709808763 |
| -0.538319706 | -0.721240948 | 0.830422416  | 0.838608054  | 0.742306262  | -0.686019617 |
| -0.609741011 | -0.75384384  | 0.75602701   | 0.876154772  | 0.63896411   | -0.605981589 |
| -0.594513982 | -0.70133763  | 0.800059277  | 0.846442215  | 0.686358186  | -0.617625359 |
| -0.563487242 | -0.687649911 | 0.723329583  | 0.813365664  | 0.664997651  | -0.614139993 |
| -0.384309934 | -0.546052444 | 0.840094484  | 0.686202055  | 0.851853235  | -0.732234043 |
| 0.541988361  | 0.791190931  | -0.746309027 | -0.757921866 | -0.658920631 | 0.668525929  |
| -0.528875575 | -0.716597374 | 0.73888151   | 0.782217466  | 0.665266851  | -0.639440986 |
| -0.671587257 | -0.677773735 | 0.679454064  | 0.887100248  | 0.558737524  | -0.554429332 |
| 0.441166356  | 0.498807308  | -0.737316884 | -0.697663702 | -0.774504894 | 0.700783068  |
| 0.553643255  | 0.583021131  | -0.755330355 | -0.696124386 | -0.679167376 | 0.639396312  |
| -0.523680173 | -0.696557851 | 0.734681731  | 0.803108683  | 0.614672352  | -0.634154731 |
| -0.52181912  | -0.628987878 | 0.681710304  | 0.699029001  | 0.62148761   | -0.689390355 |
| 0.636612894  | 0.640747461  | -0.595183778 | -0.756107595 | -0.534816443 | 0.583226664  |
| -0.249196971 | -0.498655452 | 0.807726689  | 0.669564088  | 0.844526202  | -0.771348413 |
| -0.546128579 | -0.618090113 | 0.645611733  | 0.695901707  | 0.592321323  | -0.686667958 |
| 0.374999976  | 0.528417557  | -0.708930992 | -0.713711645 | -0.740724238 | 0.596009455  |
| -0.368252702 | -0.536599154 | 0.813023883  | 0.642345018  | 0.760564616  | -0.652808717 |
| 0.437115722  | 0.700106472  | -0.656606233 | -0.746079292 | -0.614353908 | 0.714735921  |
| -0.581655983 | -0.689081801 | 0.602243715  | 1            | 0.511856214  | -0.543227865 |
| -0.279742184 | -0.441224381 | 0.787181591  | 0.602774749  | 0.850239276  | -0.697165288 |
| -0.436117409 | -0.519042378 | 0.783613346  | 0.616336168  | 0.7202537    | -0.660514318 |
| -0.308540973 | -0.375141191 | 0.74612476   | 0.539878712  | 0.795471049  | -0.754765045 |
| -0.386372394 | -0.520434754 | 0.750184402  | 0.588118119  | 0.756808462  | -0.64031557  |
| -0.412574593 | -0.502481047 | 0.611088681  | 0.651246008  | 0.680410942  | -0.670816376 |
| 0.366746155  | 0.396573803  | -0.623483439 | -0.634018634 | -0.718651924 | 0.54575889   |
| 0.585551543  | 0.76870077   | -0.553611233 | -0.789635437 | -0.495179473 | 0.602000643  |
| -0.616811318 | -0.610002179 | 0.501656926  | 0.7345614    | 0.50877803   | -0.480912185 |
| -0.364211039 | -0.494580752 | 0.753775498  | 0.608840854  | 0.751433218  | -0.66847551  |
| 0.425317007  | 0.522220536  | -0.632969789 | -0.651069534 | -0.65087028  | 0.838183552  |
| -0.316629696 | -0.539182451 | 1            | 0.602243715  | 0.7635539    | -0.657315833 |
| 0.390133165  | 0.442785401  | -0.516288548 | -0.720690936 | -0.623804392 | 0.616745925  |
| -0.068891384 | -0.30244961  | 0.7635539    | 0.511856214  | 1            | -0.736194245 |
| 0.468185447  | 0.48362118   | -0.67362375  | -0.614049622 | -0.650297286 | 0.573174272  |
| -0.373151321 | -0.429242706 | 0.560424626  | 0.526042146  | 0.651745193  | -0.642322673 |
| 0.623165287  | 0.889060536  | -0.573061827 | -0.736615727 | -0.455078184 | 0.518017408  |

|              |              |              |              |              |              |
|--------------|--------------|--------------|--------------|--------------|--------------|
| -0.624704147 | -0.726315462 | 0.509671742  | 0.796579893  | 0.395249508  | -0.412836773 |
| 0.25184401   | 0.396853155  | -0.657315833 | -0.543227865 | -0.736194245 | 1            |
| -0.270193108 | -0.39655622  | 0.656492771  | 0.475893975  | 0.723556383  | -0.621692299 |
| 0.304875672  | 0.358078977  | -0.476483662 | -0.545989033 | -0.678475642 | 0.513161135  |
| -0.565115107 | -0.573768867 | 0.420652819  | 0.771023778  | 0.405185837  | -0.440806272 |
| -0.378517496 | -0.591031351 | 0.712749716  | 0.665998305  | 0.623827056  | -0.477559538 |
| -0.355434552 | -0.553304481 | 0.526913856  | 0.773192974  | 0.503226879  | -0.526889647 |
| 0.319212803  | 0.398574618  | -0.696841323 | -0.407247249 | -0.714212087 | 0.649547853  |
| 0.684305942  | 0.706579974  | -0.428803241 | -0.714095529 | -0.308916884 | 0.443603126  |
| -0.370555674 | -0.396026103 | 0.608918884  | 0.486930837  | 0.625808852  | -0.604499292 |
| -0.609222541 | -0.750673534 | 0.425649868  | 0.768953941  | 0.275668538  | -0.389731165 |
| 0.572976177  | 0.589170307  | -0.626187108 | -0.666891022 | -0.324422633 | 0.443824608  |
| 0.645030821  | 1            | -0.539182451 | -0.689081801 | -0.30244961  | 0.396853155  |
| 0.336183055  | 0.355077334  | -0.552750175 | -0.527279496 | -0.53232301  | 0.409842     |
| -0.323142156 | -0.451025868 | 0.715206156  | 0.462318513  | 0.570132481  | -0.575720763 |
| 0.228133382  | 0.252670984  | -0.529284405 | -0.535725506 | -0.601693801 | 0.512397688  |
| 0.329747412  | 0.489686045  | -0.391004341 | -0.558683092 | -0.416268184 | 0.491832485  |
| 0.226315043  | 0.311855732  | -0.432497829 | -0.67100305  | -0.473499812 | 0.479540923  |
| -0.07089842  | -0.11867418  | 0.645695664  | 0.260086515  | 0.77272764   | -0.635297233 |
| 0.218335821  | 0.457075771  | -0.464421417 | -0.422717659 | -0.519655033 | 0.582817766  |
| 0.094782576  | 0.291254595  | -0.648886573 | -0.396362589 | -0.645005569 | 0.806912737  |
| -0.188732276 | -0.009269763 | 0.492030366  | 0.380521762  | 0.592026739  | -0.601699883 |
| 0.13821484   | 0.198664674  | -0.496115369 | -0.525572869 | -0.567273651 | 0.597861663  |
| 0.202919216  | 0.186794931  | -0.319270007 | -0.439653012 | -0.544093109 | 0.404616775  |
| 1            | 0.645030821  | -0.316629696 | -0.581655983 | -0.068891384 | 0.25184401   |
| 0.025238772  | -0.104811596 | 0.554889671  | 0.290641668  | 0.727815695  | -0.51457968  |
| 0.32045941   | 0.211619246  | -0.264363153 | -0.482758782 | -0.403722825 | 0.45030224   |
| -0.627987748 | -0.609816179 | 0.289064994  | 0.695530506  | 0.036414539  | -0.215536971 |
| 0.651987407  | 0.572810271  | -0.220366359 | -0.553350641 | -0.127195195 | 0.225396672  |
| 0.631692283  | 0.61621789   | -0.144768214 | -0.5866199   | -0.046710285 | 0.232324875  |
| 0.198799347  | 0.285101509  | -0.317503056 | -0.287319447 | -0.404127581 | 0.318010742  |
| 0.600823082  | 0.636689339  | -0.162969217 | -0.559793599 | -0.017311206 | 0.156406522  |
| 0.139301106  | 0.024609506  | -0.432037078 | -0.252891099 | -0.510448372 | 0.280121932  |
| 0.101585811  | 0.154628412  | -0.383809972 | -0.152268103 | -0.519159927 | 0.446196351  |
| 0.147611321  | 0.114637171  | -0.268391268 | -0.366383679 | -0.413987678 | 0.276179998  |
| 0.056831853  | 0.038350206  | -0.138047093 | -0.25776113  | -0.410776043 | 0.246231922  |
| 0.088486604  | 0.094514353  | -0.227368224 | -0.158459059 | -0.346780504 | 0.246111939  |

| MAP4K3       | MAP4K2       | MAP3K5       | MAP3K11      | MAP2K4       | MAP2K1       |
|--------------|--------------|--------------|--------------|--------------|--------------|
| 0.690390178  | -0.633211514 | -0.629575897 | -0.764098037 | 0.932770142  | 0.919952603  |
| 0.693210213  | -0.673564904 | -0.664330466 | -0.714568861 | 0.920407706  | 0.908625801  |
| 0.766021787  | -0.689510008 | -0.572985288 | -0.826426195 | 0.955174208  | 0.943185559  |
| 0.837967095  | -0.769920387 | -0.594509913 | -0.806977624 | 0.952866705  | 1            |
| 0.784907697  | -0.725755398 | -0.579141209 | -0.758347919 | 1            | 0.952866705  |
| 0.864043576  | -0.714103137 | -0.580283864 | -0.852948302 | 0.875178923  | 0.906727111  |
| 0.634478961  | -0.544734019 | -0.570035226 | -0.770681556 | 0.851240655  | 0.830592211  |
| -0.767486465 | 0.672885321  | 0.567400931  | 0.855222174  | -0.839542811 | -0.870009306 |
| 0.83391627   | -0.654542551 | -0.546905909 | -0.855853818 | 0.877835864  | 0.910376528  |
| 0.855708934  | -0.758788577 | -0.558212177 | -0.764224123 | 0.922244758  | 0.940092956  |
| -0.582390207 | 0.629498887  | 0.637211958  | 0.64888198   | -0.817949975 | -0.816833531 |
| -0.610034221 | 0.610857231  | 0.674596439  | 0.614370982  | -0.861712533 | -0.829493875 |
| 0.830509924  | -0.681786085 | -0.516069561 | -0.846588744 | 0.887598564  | 0.891819745  |
| 0.683621997  | -0.666687168 | -0.561531413 | -0.758822664 | 0.798646706  | 0.806054382  |
| -0.817884361 | 0.814270244  | 0.470221553  | 0.764667207  | -0.82273276  | -0.848265842 |
| 0.517397557  | -0.45965372  | -0.592946496 | -0.669507263 | 0.79446612   | 0.771100505  |
| 0.785960182  | -0.69745972  | -0.466809064 | -0.813087441 | 0.807673259  | 0.812067163  |
| -0.549861583 | 0.536921582  | 0.632911336  | 0.628420638  | -0.800360673 | -0.767872574 |
| 0.547816718  | -0.543024859 | -0.583071916 | -0.674537145 | 0.782618129  | 0.785074861  |
| -0.799787377 | 0.635334355  | 0.351161295  | 1            | -0.758347919 | -0.806977624 |
| 0.796579893  | -0.714095529 | -0.527279496 | -0.746079292 | 0.846442215  | 0.876154772  |
| 0.53149969   | -0.466618342 | -0.538915277 | -0.658107249 | 0.759030112  | 0.72894455   |
| 0.552880191  | -0.480284539 | -0.552147213 | -0.683639623 | 0.772266356  | 0.750344688  |
| 0.470947052  | -0.475694459 | -0.585410826 | -0.64165602  | 0.724860336  | 0.682378961  |
| 0.559322677  | -0.475838274 | -0.582624006 | -0.682832371 | 0.771336908  | 0.749388607  |
| 0.642070909  | -0.607083649 | -0.532678    | -0.680057715 | 0.750203226  | 0.748148812  |
| -0.571467517 | 0.407763487  | 0.566812865  | 0.664252141  | -0.697651062 | -0.68065422  |
| -0.718100005 | 0.747298069  | 0.386992043  | 0.806531772  | -0.763179183 | -0.782121604 |
| 0.832098178  | -0.679909329 | -0.474374771 | -0.710386707 | 0.753352802  | 0.801373186  |
| 0.529581     | -0.505260246 | -0.294230406 | -0.702388265 | 0.790961643  | 0.739649693  |
| -0.638389261 | 0.581610295  | 0.344540212  | 0.772169958  | -0.73241601  | -0.723242824 |
| 0.509671742  | -0.428803241 | -0.552750175 | -0.656606233 | 0.800059277  | 0.75602701   |
| -0.530853662 | 0.578676254  | 0.586801865  | 0.545820762  | -0.682809147 | -0.714174104 |
| 0.395249508  | -0.308916884 | -0.53232301  | -0.614353908 | 0.686358186  | 0.63896411   |
| -0.479164096 | 0.554929855  | 0.525860539  | 0.549921049  | -0.744706243 | -0.697969235 |
| 0.578519008  | -0.499650769 | -0.480415024 | -0.66927628  | 0.66371841   | 0.658999058  |
| -0.770865222 | 0.72984235   | 0.416868163  | 0.7508516    | -0.776799859 | -0.812054178 |

|              |              |              |              |              |              |
|--------------|--------------|--------------|--------------|--------------|--------------|
| 1            | -0.758330115 | -0.413315572 | -0.799787377 | 0.784907697  | 0.837967095  |
| -0.412836773 | 0.443603126  | 0.409842     | 0.714735921  | -0.617625359 | -0.605981589 |
| 0.439014919  | -0.425867688 | -0.435186905 | -0.56665487  | 0.671583202  | 0.632466916  |
| -0.556701558 | 0.333627691  | 0.583982607  | 0.587865763  | -0.562926879 | -0.607688422 |
| 0.783655482  | -0.657806882 | -0.436288771 | -0.68045932  | 0.693573312  | 0.730979188  |
| 0.44957102   | -0.519806136 | -0.507710785 | -0.46957372  | 0.772751783  | 0.728409273  |
| 0.578811926  | -0.487266171 | -0.584735503 | -0.626461263 | 0.660403095  | 0.697969161  |
| -0.37576389  | 0.432009095  | 0.333605066  | 0.563750452  | -0.666933372 | -0.612322566 |
| -0.758330115 | 1            | 0.344531885  | 0.635334355  | -0.725755398 | -0.769920387 |
| 0.432722976  | -0.449118355 | -0.208030617 | -0.621631196 | 0.660395498  | 0.602836655  |
| 0.85188115   | -0.669881143 | -0.294300478 | -0.790180043 | 0.685504453  | 0.760973299  |
| -0.649823115 | 0.651093179  | 0.516416343  | 0.569413182  | -0.774674917 | -0.778841453 |
| -0.726315462 | 0.706579974  | 0.355077334  | 0.700106472  | -0.70133763  | -0.75384384  |
| -0.413315572 | 0.344531885  | 1            | 0.351161295  | -0.579141209 | -0.594509913 |
| 0.378687913  | -0.446602649 | -0.292118949 | -0.552310699 | 0.645428713  | 0.589229301  |
| -0.2851745   | 0.364430104  | 0.442813056  | 0.378651418  | -0.58396974  | -0.543363494 |
| -0.676856601 | 0.478289173  | 0.269852927  | 0.792376174  | -0.4874065   | -0.573691252 |
| -0.510654828 | 0.407211356  | 0.361655757  | 0.554842713  | -0.58244629  | -0.570371891 |
| 0.122126197  | -0.12835656  | -0.282154215 | -0.393038425 | 0.484055193  | 0.399938205  |
| -0.506228719 | 0.306592487  | 0.320707863  | 0.768503781  | -0.439997295 | -0.515429966 |
| -0.302265581 | 0.240439606  | 0.322875449  | 0.585359692  | -0.553163549 | -0.494395552 |
| 0.254078752  | -0.253291323 | -0.433475508 | -0.350647284 | 0.486776663  | 0.417558221  |
| -0.425007633 | 0.304813559  | 0.215630348  | 0.585245652  | -0.551191413 | -0.498317754 |
| -0.243826831 | 0.336452727  | 0.336375502  | 0.335276624  | -0.406513513 | -0.402181813 |
| -0.624704147 | 0.684305942  | 0.336183055  | 0.437115722  | -0.594513982 | -0.609741011 |
| 0.067847001  | -0.118014626 | -0.443569468 | -0.251009804 | 0.441570684  | 0.399465542  |
| -0.350434144 | 0.390350158  | 0.455415546  | 0.309829331  | -0.416441756 | -0.45740358  |
| 0.764601529  | -0.682840124 | -0.25325366  | -0.582878209 | 0.584429846  | 0.633422484  |
| -0.59205723  | 0.516842045  | 0.38392321   | 0.459511296  | -0.441207949 | -0.523551134 |
| -0.668617502 | 0.665137676  | 0.39677328   | 0.476318741  | -0.455351608 | -0.567696917 |
| -0.393111438 | 0.254278803  | 0.637371562  | 0.349931275  | -0.329856305 | -0.408171742 |
| -0.69184617  | 0.679301802  | 0.368533248  | 0.448807567  | -0.445239408 | -0.569319812 |
| -0.092452127 | 0.129975305  | 0.548577854  | 0.05695296   | -0.438973862 | -0.360583536 |
| -0.084206215 | 0.118824732  | 0.350522403  | 0.286911937  | -0.32645045  | -0.310631272 |
| -0.172598981 | 0.205877109  | 0.308320719  | 0.259124038  | -0.326044664 | -0.267038236 |
| -0.184378044 | 0.087139786  | 0.320429039  | 0.163942291  | -0.20392654  | -0.241718074 |
| -0.08969154  | 0.13578905   | 0.289891406  | 0.200224434  | -0.194910887 | -0.203991342 |

| LAMTOR3      | KRAS         | KITLG        | KIT          | IGF1         | HSPB1        |
|--------------|--------------|--------------|--------------|--------------|--------------|
| 0.602721672  | 0.666982979  | 0.773890222  | 0.73862228   | 0.704384465  | -0.64992345  |
| 0.540317601  | 0.645630136  | 0.758829917  | 0.731200789  | 0.688718663  | -0.691035229 |
| 0.696852595  | 0.679045504  | 0.812641854  | 0.692802027  | 0.684401376  | -0.606371947 |
| 0.760973299  | 0.697969161  | 0.812067163  | 0.632466916  | 0.658999058  | -0.607688422 |
| 0.685504453  | 0.660403095  | 0.807673259  | 0.671583202  | 0.66371841   | -0.562926879 |
| 0.744920722  | 0.646452581  | 0.862907717  | 0.648459696  | 0.737253417  | -0.689822972 |
| 0.532279545  | 0.56274154   | 0.756922644  | 0.722966244  | 0.704394654  | -0.641488944 |
| -0.723285876 | -0.661636556 | -0.796020668 | -0.618403308 | -0.686035347 | 0.642052279  |
| 0.788289246  | 0.636406226  | 0.848514225  | 0.606483492  | 0.684512891  | -0.643332437 |
| 0.755007434  | 0.684502908  | 0.79142886   | 0.5967923    | 0.640574638  | -0.627206553 |
| -0.476256387 | -0.665623174 | -0.723604666 | -0.72482854  | -0.676277585 | 0.634205604  |
| -0.444919893 | -0.614214399 | -0.711389514 | -0.658704303 | -0.630311758 | 0.669056376  |
| 0.770722853  | 0.659134121  | 0.86370344   | 0.57400675   | 0.680938167  | -0.544074302 |
| 0.603385834  | 0.611747452  | 0.860176725  | 0.611545486  | 0.739535024  | -0.551217254 |
| -0.71044664  | -0.493148842 | -0.839873886 | -0.625570675 | -0.738843452 | 0.561930067  |
| 0.43273762   | 0.648676568  | 0.686080489  | 0.708161131  | 0.64228773   | -0.578909309 |
| 0.694782702  | 0.542768248  | 1            | 0.655958278  | 0.794405844  | -0.556018365 |
| -0.458447134 | -0.671629586 | -0.643591756 | -0.626043994 | -0.605052241 | 0.592849325  |
| 0.487971577  | 0.555026742  | 0.651865349  | 0.618243668  | 0.592264865  | -0.556433629 |
| -0.790180043 | -0.626461263 | -0.813087441 | -0.56665487  | -0.66927628  | 0.587865763  |
| 0.768953941  | 0.773192974  | 0.695901707  | 0.475893975  | 0.526042146  | -0.545989033 |
| 0.382049945  | 0.499454212  | 0.651110677  | 0.742154405  | 0.652543205  | -0.651075137 |
| 0.497762434  | 0.538843406  | 0.699587952  | 0.64828244   | 0.64790607   | -0.600744353 |
| 0.321841397  | 0.494116136  | 0.768491899  | 0.724655356  | 0.771202111  | -0.576979296 |
| 0.469927417  | 0.495825727  | 0.708400679  | 0.656112776  | 0.722824674  | -0.605113691 |
| 0.537922645  | 0.524639313  | 0.776199434  | 0.731464282  | 0.759708493  | -0.643030466 |
| -0.459874497 | -0.553419478 | -0.650219992 | -0.630618608 | -0.673005197 | 0.773436424  |
| -0.753201894 | -0.607643721 | -0.714598562 | -0.514139308 | -0.546048826 | 0.467330993  |
| 0.700473396  | 0.54446556   | 0.741054491  | 0.560331543  | 0.61918547   | -0.714929267 |
| 0.461746685  | 0.427847364  | 0.65586354   | 0.701923589  | 0.588450804  | -0.543070502 |
| -0.543628445 | -0.469320622 | -0.747276559 | -0.650274149 | -0.688715863 | 0.567577582  |
| 0.425649868  | 0.526913856  | 0.645611733  | 0.656492771  | 0.560424626  | -0.476483662 |
| -0.447019744 | -0.636744938 | -0.593259506 | -0.532601566 | -0.558289584 | 0.672572897  |
| 0.275668538  | 0.503226879  | 0.592321323  | 0.723556383  | 0.651745193  | -0.678475642 |
| -0.409243702 | -0.492809062 | -0.601216613 | -0.603597911 | -0.523581598 | 0.483521727  |
| 0.480544233  | 0.434570871  | 0.794405844  | 0.765480236  | 1            | -0.646622506 |
| -0.727940712 | -0.591465404 | -0.716129668 | -0.501251816 | -0.576015771 | 0.503233138  |

|              |              |              |              |              |              |
|--------------|--------------|--------------|--------------|--------------|--------------|
| 0.85188115   | 0.578811926  | 0.785960182  | 0.439014919  | 0.578519008  | -0.556701558 |
| -0.389731165 | -0.526889647 | -0.686667958 | -0.621692299 | -0.642322673 | 0.513161135  |
| 0.322859626  | 0.409574775  | 0.655958278  | 1            | 0.765480236  | -0.560143444 |
| -0.411218047 | -0.505090121 | -0.556018365 | -0.560143444 | -0.646622506 | 1            |
| 0.795104434  | 0.5912117    | 0.716949625  | 0.376083453  | 0.549269097  | -0.490594582 |
| 0.354916089  | 0.526661544  | 0.459455053  | 0.571872306  | 0.394046194  | -0.375826716 |
| 0.568888995  | 1            | 0.542768248  | 0.409574775  | 0.434570871  | -0.505090121 |
| -0.275826239 | -0.328894392 | -0.554415335 | -0.666625572 | -0.554759631 | 0.490045     |
| -0.669881143 | -0.487266171 | -0.69745972  | -0.425867688 | -0.499650769 | 0.333627691  |
| 0.402767111  | 0.357320426  | 0.576832726  | 0.601169306  | 0.531845492  | -0.480289392 |
| 1            | 0.568888995  | 0.694782702  | 0.322859626  | 0.480544233  | -0.411218047 |
| -0.575431655 | -0.543571524 | -0.648038868 | -0.42554866  | -0.448976665 | 0.267540838  |
| -0.750673534 | -0.553304481 | -0.618090113 | -0.39655622  | -0.429242706 | 0.358078977  |
| -0.294300478 | -0.584735503 | -0.466809064 | -0.435186905 | -0.480415024 | 0.583982607  |
| 0.37590156   | 0.311248912  | 0.529589705  | 0.587105358  | 0.548197398  | -0.242780595 |
| -0.146531413 | -0.485789551 | -0.416693417 | -0.535600385 | -0.422469619 | 0.53338214   |
| -0.719617577 | -0.535984349 | -0.660294507 | -0.362824419 | -0.56182708  | 0.55646938   |
| -0.430301682 | -0.537392082 | -0.502883431 | -0.445278801 | -0.470166204 | 0.47916178   |
| 0.019725958  | 0.227312572  | 0.365006237  | 0.618065095  | 0.457403622  | -0.489856154 |
| -0.598091701 | -0.469990331 | -0.561668777 | -0.407410544 | -0.522003584 | 0.494645311  |
| -0.306643174 | -0.417614713 | -0.575382153 | -0.534088125 | -0.535952083 | 0.359927279  |
| 0.124917904  | 0.353846984  | 0.545288347  | 0.560055186  | 0.565875168  | -0.489423591 |
| -0.384004665 | -0.533545914 | -0.556552099 | -0.486944629 | -0.520392899 | 0.357284539  |
| -0.19818127  | -0.362677603 | -0.334830861 | -0.455474453 | -0.389750993 | 0.516797788  |
| -0.609222541 | -0.355434552 | -0.546128579 | -0.270193108 | -0.373151321 | 0.304875672  |
| -0.009735792 | 0.293331341  | 0.265970091  | 0.584563454  | 0.388448503  | -0.502072621 |
| -0.217043894 | -0.575310897 | -0.371733371 | -0.376842267 | -0.366943766 | 0.563357825  |
| 0.808478016  | 0.530930433  | 0.570440555  | 0.17155696   | 0.327245941  | -0.146111274 |
| -0.653385192 | -0.49153468  | -0.473086744 | -0.238968907 | -0.363600342 | 0.50066118   |
| -0.664935768 | -0.484751508 | -0.548065974 | -0.210697487 | -0.38331265  | 0.430372802  |
| -0.318338444 | -0.365599581 | -0.448881754 | -0.299502472 | -0.479990222 | 0.527830486  |
| -0.630379416 | -0.412923801 | -0.500964264 | -0.092119779 | -0.290815135 | 0.362846668  |
| 0.093555822  | -0.251508554 | -0.227564926 | -0.493698658 | -0.33177086  | 0.477854684  |
| -0.073998757 | -0.243277238 | -0.274302809 | -0.418477177 | -0.391745577 | 0.393991368  |
| -0.166337244 | -0.310040854 | -0.290662571 | -0.339681384 | -0.342044682 | 0.336734799  |
| -0.026489544 | -0.201720869 | -0.09573329  | -0.238848533 | -0.237351001 | 0.735876071  |
| -0.028299621 | -0.240411585 | -0.232507102 | -0.335477028 | -0.338195908 | 0.401696919  |



| HSPA8        | HSPA1A       | GNA12        | FLNB         | FGFR3        | FGF9         |
|--------------|--------------|--------------|--------------|--------------|--------------|
| 0.430731271  | -0.30448604  | -0.858469738 | -0.562865042 | -0.677754539 | 0.628955014  |
| 0.408588783  | -0.395975178 | -0.901484531 | -0.529824593 | -0.682070089 | 0.60738066   |
| 0.520062298  | -0.234529645 | -0.843818848 | -0.583153981 | -0.718034286 | 0.549061655  |
| 0.633422484  | -0.241718074 | -0.829493875 | -0.498317754 | -0.778841453 | 0.399938205  |
| 0.584429846  | -0.20392654  | -0.861712533 | -0.551191413 | -0.774674917 | 0.484055193  |
| 0.607070234  | -0.255749355 | -0.7695523   | -0.52038992  | -0.676155601 | 0.429042521  |
| 0.333970781  | -0.276548287 | -0.79488071  | -0.570786922 | -0.581956851 | 0.723366769  |
| -0.510119159 | 0.217899541  | 0.773995901  | 0.433815597  | 0.604527759  | -0.464725854 |
| 0.576173214  | -0.217524371 | -0.763878046 | -0.482220445 | -0.670335614 | 0.429070775  |
| 0.669652264  | -0.298268231 | -0.818364783 | -0.514297631 | -0.761451352 | 0.359636561  |
| -0.363024897 | 0.310923597  | 0.843424386  | 0.540653112  | 0.628309413  | -0.585704974 |
| -0.353100537 | 0.36476695   | 1            | 0.403486634  | 0.701892597  | -0.582680973 |
| 0.632863213  | -0.119562882 | -0.71675601  | -0.551807397 | -0.723105505 | 0.382161912  |
| 0.469580156  | -0.139131492 | -0.76252299  | -0.543421369 | -0.647030947 | 0.463344764  |
| -0.649715039 | 0.162409576  | 0.725604991  | 0.434801636  | 0.684363462  | -0.317717051 |
| 0.213108822  | -0.301079593 | -0.775434603 | -0.565088206 | -0.525796024 | 0.69298979   |
| 0.570440555  | -0.09573329  | -0.711389514 | -0.556552099 | -0.648038868 | 0.365006237  |
| -0.348773628 | 0.296248439  | 0.807858107  | 0.519331285  | 0.574826986  | -0.52730391  |
| 0.258656884  | -0.244707611 | -0.752955566 | -0.459353352 | -0.552755118 | 0.6436427    |
| -0.582878209 | 0.163942291  | 0.614370982  | 0.585245652  | 0.569413182  | -0.393038425 |
| 0.695530506  | -0.25776113  | -0.696124386 | -0.525572869 | -0.666891022 | 0.260086515  |
| 0.181289241  | -0.351052303 | -0.748602517 | -0.489254698 | -0.451981658 | 0.710732033  |
| 0.336206236  | -0.209217594 | -0.757128838 | -0.470449968 | -0.533303112 | 0.568126754  |
| 0.19743299   | -0.185068954 | -0.773998748 | -0.531817205 | -0.515933913 | 0.67955108   |
| 0.282193388  | -0.196998892 | -0.732625983 | -0.459316471 | -0.52982231  | 0.564270711  |
| 0.426717691  | -0.290336283 | -0.723796317 | -0.45764852  | -0.516275669 | 0.457040548  |
| -0.267977528 | 0.428260542  | 0.736656752  | 0.460959238  | 0.396922004  | -0.557584815 |
| -0.603125485 | 0.115544224  | 0.651569824  | 0.400999238  | 0.532632024  | -0.341232813 |
| 0.547785429  | -0.43378169  | -0.709909851 | -0.399310142 | -0.562480362 | 0.337081729  |
| 0.262507291  | -0.265254399 | -0.724047201 | -0.543655648 | -0.473312761 | 0.747838019  |
| -0.384012714 | 0.290218464  | 0.672947789  | 0.576749946  | 0.486134017  | -0.546375915 |
| 0.289064994  | -0.138047093 | -0.755330355 | -0.496115369 | -0.626187108 | 0.645695664  |
| -0.271567145 | 0.525932555  | 0.744340696  | 0.41259106   | 0.445263635  | -0.471561486 |
| 0.036414539  | -0.410776043 | -0.679167376 | -0.567273651 | -0.324422633 | 0.77272764   |
| -0.316401228 | 0.196047345  | 0.767023965  | 0.386072262  | 0.487114602  | -0.616763411 |
| 0.327245941  | -0.237351001 | -0.630311758 | -0.520392899 | -0.448976665 | 0.457403622  |
| -0.558311713 | 0.18019596   | 0.670057674  | 0.329409406  | 0.588000214  | -0.246718216 |

|              |              |              |              |              |              |
|--------------|--------------|--------------|--------------|--------------|--------------|
| 0.764601529  | -0.184378044 | -0.610034221 | -0.425007633 | -0.649823115 | 0.122126197  |
| -0.215536971 | 0.246231922  | 0.639396312  | 0.597861663  | 0.443824608  | -0.635297233 |
| 0.17155696   | -0.238848533 | -0.658704303 | -0.486944629 | -0.42554866  | 0.618065095  |
| -0.146111274 | 0.735876071  | 0.669056376  | 0.357284539  | 0.267540838  | -0.489856154 |
| 0.686168621  | -0.178882263 | -0.519188156 | -0.430809979 | -0.545649431 | 0.182784153  |
| 0.250206672  | -0.233631333 | -0.716666113 | -0.309308064 | -0.516746504 | 0.496687257  |
| 0.530930433  | -0.201720869 | -0.614214399 | -0.533545914 | -0.543571524 | 0.227312572  |
| -0.076052657 | 0.278751111  | 0.710710614  | 0.358467906  | 0.408242805  | -0.723282185 |
| -0.682840124 | 0.087139786  | 0.610857231  | 0.304813559  | 0.651093179  | -0.12835656  |
| 0.262666244  | -0.186225248 | -0.628583902 | -0.447883983 | -0.41086039  | 0.635356902  |
| 0.808478016  | -0.026489544 | -0.444919893 | -0.384004665 | -0.575431655 | 0.019725958  |
| -0.659281948 | -0.028739962 | 0.701892597  | 0.404565462  | 1            | -0.181632724 |
| -0.609816179 | 0.038350206  | 0.583021131  | 0.198664674  | 0.589170307  | -0.11867418  |
| -0.25325366  | 0.320429039  | 0.674596439  | 0.215630348  | 0.516416343  | -0.282154215 |
| 0.300696421  | 0.07417993   | -0.517580033 | -0.46925698  | -0.429852278 | 0.568946099  |
| -0.099656718 | 0.445948181  | 0.680474357  | 0.370615197  | 0.373745885  | -0.497128138 |
| -0.562133923 | 0.121949722  | 0.372833004  | 0.451970595  | 0.366958619  | -0.178851229 |
| -0.410237989 | 0.284805943  | 0.505949895  | 0.505581241  | 0.409606704  | -0.250390777 |
| -0.201867937 | -0.374212235 | -0.582680973 | -0.429629075 | -0.181632724 | 1            |
| -0.342893091 | 0.07314689   | 0.374385011  | 0.366412333  | 0.289940516  | -0.352519774 |
| -0.201225009 | 0.03212308   | 0.522629759  | 0.602019465  | 0.433187933  | -0.551260752 |
| 0.089779683  | -0.295504112 | -0.572795039 | -0.479719099 | -0.363524781 | 0.589732506  |
| -0.338119878 | 0.134917124  | 0.403486634  | 1            | 0.404565462  | -0.429629075 |
| -0.072595234 | 0.411369994  | 0.486889359  | 0.251759012  | 0.07264513   | -0.473315761 |
| -0.627987748 | 0.056831853  | 0.553643255  | 0.13821484   | 0.572976177  | -0.07089842  |
| -0.211657111 | -0.457074737 | -0.566368368 | -0.307517759 | -0.130904101 | 0.673008232  |
| -0.157578933 | 0.523189052  | 0.565926497  | 0.338303143  | 0.293460283  | -0.310968249 |
| 1            | 0.232478941  | -0.353100537 | -0.338119878 | -0.659281948 | -0.201867937 |
| -0.557799207 | 0.18775615   | 0.451227179  | 0.116258013  | 0.357022596  | 0.026054047  |
| -0.647070331 | 0.173837439  | 0.407780587  | 0.100339101  | 0.474537254  | 0.229558364  |
| -0.180178172 | 0.235215162  | 0.413771163  | 0.089630346  | 0.270848756  | -0.166315655 |
| -0.615524312 | 0.184426521  | 0.395782379  | 0.04030661   | 0.479642926  | 0.184007048  |
| 0.099259144  | 0.427610155  | 0.607883545  | 0.142328413  | 0.295085271  | -0.490030418 |
| 0.190849354  | 0.31267058   | 0.460851     | 0.192636949  | 0.135527892  | -0.549914765 |
| -0.129813189 | 0.134696507  | 0.331733809  | 0.203345568  | 0.012526344  | -0.284537227 |
| 0.232478941  | 1            | 0.36476695   | 0.134917124  | -0.028739962 | -0.374212235 |
| 0.053687345  | 0.268852978  | 0.318416666  | 0.209347857  | 0.104586107  | -0.282834351 |

| FGF2         | FGF1         | ELK1         | EFNA1        | DUSP8        | DUSP3        |
|--------------|--------------|--------------|--------------|--------------|--------------|
| -0.509085524 | -0.612251161 | -0.393809551 | -0.58486429  | -0.408198777 | -0.331758807 |
| -0.556752898 | -0.568286358 | -0.437120864 | -0.622671297 | -0.407437973 | -0.403225912 |
| -0.367740128 | -0.577907549 | -0.425646353 | -0.579396077 | -0.357310962 | -0.432823181 |
| -0.360583536 | -0.494395552 | -0.523551134 | -0.570371891 | -0.408171742 | -0.569319812 |
| -0.438973862 | -0.553163549 | -0.441207949 | -0.58244629  | -0.329856305 | -0.445239408 |
| -0.321607039 | -0.517498248 | -0.528698803 | -0.529577112 | -0.528057412 | -0.563793227 |
| -0.431374166 | -0.640642373 | -0.291750517 | -0.472679558 | -0.479426673 | -0.270529361 |
| 0.242142797  | 0.53119199   | 0.503944943  | 0.456773028  | 0.530175807  | 0.571227577  |
| -0.240824786 | -0.540994005 | -0.518323143 | -0.478096766 | -0.531735086 | -0.551707626 |
| -0.399040101 | -0.416606274 | -0.584059458 | -0.627676362 | -0.356684199 | -0.56674026  |
| 0.516735454  | 0.481001345  | 0.436935246  | 0.505093266  | 0.501653357  | 0.331195022  |
| 0.607883545  | 0.522629759  | 0.451227179  | 0.505949895  | 0.413771163  | 0.395782379  |
| -0.181762413 | -0.58805546  | -0.416375964 | -0.496008075 | -0.411561016 | -0.500327647 |
| -0.235891338 | -0.550427283 | -0.436636647 | -0.461051    | -0.488146932 | -0.466835139 |
| 0.285120275  | 0.442910321  | 0.558093056  | 0.541718501  | 0.409218307  | 0.519172823  |
| -0.44168599  | -0.647252494 | -0.249389114 | -0.478058256 | -0.426821561 | -0.189070116 |
| -0.227564926 | -0.575382153 | -0.473086744 | -0.502883431 | -0.448881754 | -0.500964264 |
| 0.500699269  | 0.451140478  | 0.382790475  | 0.592314553  | 0.410331397  | 0.356173086  |
| -0.394784206 | -0.527644497 | -0.285547208 | -0.435105978 | -0.452862953 | -0.315582866 |
| 0.05695296   | 0.585359692  | 0.459511296  | 0.554842713  | 0.349931275  | 0.448807567  |
| -0.252891099 | -0.396362589 | -0.553350641 | -0.67100305  | -0.287319447 | -0.559793599 |
| -0.519007181 | -0.603914182 | -0.216056544 | -0.490932776 | -0.404883061 | -0.183274935 |
| -0.446372218 | -0.569903414 | -0.45367842  | -0.466143562 | -0.377713796 | -0.223883068 |
| -0.449836165 | -0.666599945 | -0.226706769 | -0.43178467  | -0.471896447 | -0.155283867 |
| -0.354201356 | -0.549982354 | -0.335093682 | -0.376021495 | -0.533872168 | -0.251321105 |
| -0.466336357 | -0.491147964 | -0.420364043 | -0.563659125 | -0.412496255 | -0.381701313 |
| 0.571814025  | 0.423313778  | 0.420740675  | 0.659908704  | 0.449219564  | 0.27284528   |
| 0.132401709  | 0.447068702  | 0.556801539  | 0.545065877  | 0.290787194  | 0.521415569  |
| -0.335080393 | -0.261760672 | -0.621373258 | -0.477299232 | -0.448310072 | -0.601330756 |
| -0.405169987 | -0.606416675 | -0.235865026 | -0.479762296 | -0.116715659 | -0.120846379 |
| 0.255055534  | 0.670847242  | 0.298470448  | 0.582175555  | 0.250742674  | 0.358683136  |
| -0.432037078 | -0.648886573 | -0.220366359 | -0.432497829 | -0.317503056 | -0.162969217 |
| 0.504691833  | 0.360535693  | 0.482441131  | 0.622594318  | 0.337622803  | 0.407184422  |
| -0.510448372 | -0.645005569 | -0.127195195 | -0.473499812 | -0.404127581 | -0.017311206 |
| 0.471456107  | 0.447059873  | 0.377015995  | 0.427354498  | 0.31724071   | 0.194337441  |
| -0.33177086  | -0.535952083 | -0.363600342 | -0.470166204 | -0.479990222 | -0.290815135 |
| 0.125862292  | 0.382378887  | 0.527152488  | 0.393434455  | 0.347062419  | 0.606634903  |

|              |              |              |              |              |              |
|--------------|--------------|--------------|--------------|--------------|--------------|
| -0.092452127 | -0.302265581 | -0.59205723  | -0.510654828 | -0.393111438 | -0.69184617  |
| 0.280121932  | 0.806912737  | 0.225396672  | 0.479540923  | 0.318010742  | 0.156406522  |
| -0.493698658 | -0.534088125 | -0.238968907 | -0.445278801 | -0.299502472 | -0.092119779 |
| 0.477854684  | 0.359927279  | 0.50066118   | 0.47916178   | 0.527830486  | 0.362846668  |
| -0.101141808 | -0.317712235 | -0.532669224 | -0.447856327 | -0.476297252 | -0.607698317 |
| -0.448129471 | -0.377082148 | -0.250696619 | -0.443391573 | -0.171351942 | -0.242431474 |
| -0.251508554 | -0.417614713 | -0.49153468  | -0.537392082 | -0.365599581 | -0.412923801 |
| 0.475037527  | 0.558356209  | 0.12252351   | 0.247239466  | 0.281766802  | 0.084446149  |
| 0.129975305  | 0.240439606  | 0.516842045  | 0.407211356  | 0.254278803  | 0.679301802  |
| -0.371715197 | -0.571082234 | -0.259793506 | -0.399134559 | -0.020939596 | -0.009550639 |
| 0.093555822  | -0.306643174 | -0.653385192 | -0.430301682 | -0.318338444 | -0.630379416 |
| 0.295085271  | 0.433187933  | 0.357022596  | 0.409606704  | 0.270848756  | 0.479642926  |
| 0.024609506  | 0.291254595  | 0.572810271  | 0.311855732  | 0.285101509  | 0.636689339  |
| 0.548577854  | 0.322875449  | 0.38392321   | 0.361655757  | 0.637371562  | 0.368533248  |
| -0.210480585 | -0.563000568 | -0.089112808 | -0.338317455 | -0.084799735 | -0.083452649 |
| 0.722301227  | 0.387697707  | 0.239984574  | 0.672927895  | 0.073079994  | 0.109138818  |
| -0.055632764 | 0.392540475  | 0.544559385  | 0.442815268  | 0.371447996  | 0.434021351  |
| 0.411879978  | 0.367696175  | 0.318999095  | 1            | 0.011464755  | 0.236873194  |
| -0.490030418 | -0.551260752 | 0.026054047  | -0.250390777 | -0.166315655 | 0.184007048  |
| -0.083190683 | 0.463323723  | 0.36879488   | 0.239460447  | 0.513601041  | 0.285543476  |
| 0.242557869  | 1            | 0.02616654   | 0.367696175  | 0.186457873  | -0.019326102 |
| -0.600388935 | -0.519453483 | -0.121573636 | -0.446416572 | -0.234762624 | 0.019527973  |
| 0.142328413  | 0.602019465  | 0.116258013  | 0.505581241  | 0.089630346  | 0.04030661   |
| 0.446165091  | 0.207558903  | 0.347369756  | 0.474849936  | 0.275780709  | 0.161483672  |
| 0.139301106  | 0.094782576  | 0.651987407  | 0.226315043  | 0.198799347  | 0.600823082  |
| -0.639810645 | -0.367621795 | -0.057692567 | -0.35983222  | -0.223995537 | 0.107626496  |
| 0.413181517  | 0.114500517  | 0.486365271  | 0.448945817  | 0.265840199  | 0.315601463  |
| 0.099259144  | -0.201225009 | -0.557799207 | -0.410237989 | -0.180178172 | -0.615524312 |
| 0.081104323  | 0.02616654   | 1            | 0.318999095  | 0.377022966  | 0.573809963  |
| 0.003745658  | 0.072168992  | 0.761729427  | 0.311897228  | 0.336626945  | 0.696195023  |
| 0.22387058   | 0.186457873  | 0.377022966  | 0.011464755  | 1            | 0.470215844  |
| -0.002818281 | -0.019326102 | 0.573809963  | 0.236873194  | 0.470215844  | 1            |
| 1            | 0.242557869  | 0.081104323  | 0.411879978  | 0.22387058   | -0.002818281 |
| 0.306391153  | 0.19544744   | 0.113714354  | 0.095875419  | 0.394506983  | -0.023292251 |
| 0.387664746  | 0.20952394   | 0.215063321  | 0.522553735  | 0.144807232  | -0.030604241 |
| 0.427610155  | 0.03212308   | 0.18775615   | 0.284805943  | 0.235215162  | 0.184426521  |
| 0.246479359  | 0.141188921  | 0.199119658  | 0.20584511   | 0.336371722  | 0.039864413  |

| DUSP1        | DAXX         | CSF1R        | CRK          | CDC25B       | CD14         |
|--------------|--------------|--------------|--------------|--------------|--------------|
| -0.258494873 | -0.514332875 | -0.776199888 | -0.425490764 | -0.516642349 | -0.395072071 |
| -0.309140762 | -0.429278502 | -0.75743694  | -0.393415718 | -0.451562295 | -0.358606201 |
| -0.240108512 | -0.556284094 | -0.724090342 | -0.417785536 | -0.558740675 | -0.325962197 |
| -0.203991342 | -0.515429966 | -0.697969235 | -0.310631272 | -0.573691252 | -0.267038236 |
| -0.194910887 | -0.439997295 | -0.744706243 | -0.32645045  | -0.4874065   | -0.326044664 |
| -0.257497847 | -0.586626966 | -0.68009742  | -0.235224226 | -0.685763056 | -0.348191732 |
| -0.292207376 | -0.612612648 | -0.748457428 | -0.507081193 | -0.548256649 | -0.391658911 |
| 0.284251288  | 0.721782611  | 0.653571955  | 0.428163775  | 0.642912375  | 0.313170793  |
| -0.22536087  | -0.689260935 | -0.640099069 | -0.36312805  | -0.662614811 | -0.254331903 |
| -0.199121838 | -0.420293922 | -0.68093095  | -0.245178833 | -0.56565655  | -0.285243221 |
| 0.43014162   | 0.486233421  | 0.757846038  | 0.575069291  | 0.482640596  | 0.360762603  |
| 0.318416666  | 0.374385011  | 0.767023965  | 0.460851     | 0.372833004  | 0.331733809  |
| -0.189812308 | -0.60482299  | -0.613140288 | -0.291444441 | -0.658460503 | -0.259965438 |
| -0.360731493 | -0.5857574   | -0.643444166 | -0.476538106 | -0.572859173 | -0.312999849 |
| 0.286112586  | 0.481869804  | 0.663661236  | 0.226295551  | 0.62654572   | 0.349016552  |
| -0.274281736 | -0.508694184 | -0.705378968 | -0.531536198 | -0.417439834 | -0.342487455 |
| -0.232507102 | -0.561668777 | -0.601216613 | -0.274302809 | -0.660294507 | -0.290662571 |
| 0.327166751  | 0.435795931  | 0.69718438   | 0.484024811  | 0.432861317  | 0.402829931  |
| -0.326993888 | -0.532036235 | -0.703358057 | -0.500514483 | -0.457406329 | -0.349505764 |
| 0.200224434  | 0.768503781  | 0.549921049  | 0.286911937  | 0.792376174  | 0.259124038  |
| -0.158459059 | -0.422717659 | -0.614049622 | -0.152268103 | -0.558683092 | -0.366383679 |
| -0.280893361 | -0.48179507  | -0.710842293 | -0.408570772 | -0.450836326 | -0.461037901 |
| -0.214767796 | -0.515639446 | -0.709446699 | -0.412800506 | -0.521490198 | -0.35241148  |
| -0.441667921 | -0.505294269 | -0.716571926 | -0.507140873 | -0.442024599 | -0.429963008 |
| -0.317764316 | -0.566754898 | -0.672285372 | -0.508232748 | -0.488514151 | -0.389452971 |
| -0.182794684 | -0.482037647 | -0.618383861 | -0.318955009 | -0.539111092 | -0.383573369 |
| 0.437521843  | 0.504239464  | 0.696267568  | 0.437177117  | 0.567476569  | 0.641791789  |
| 0.207998167  | 0.548437767  | 0.732933603  | 0.270567235  | 0.611421616  | 0.454939051  |
| -0.223343193 | -0.475261341 | -0.55957313  | -0.304811331 | -0.606756242 | -0.233152292 |
| -0.188356052 | -0.454529804 | -0.690369084 | -0.391025634 | -0.456041781 | -0.322875825 |
| 0.165430101  | 0.513771995  | 0.579638875  | 0.313678451  | 0.501875875  | 0.233859527  |
| -0.227368224 | -0.464421417 | -0.67362375  | -0.383809972 | -0.391004341 | -0.268391268 |
| 0.341507148  | 0.336896661  | 0.621059976  | 0.486622067  | 0.418358054  | 0.412074343  |
| -0.346780504 | -0.519655033 | -0.650297286 | -0.519159927 | -0.416268184 | -0.413987678 |
| 0.300652889  | 0.344636281  | 1            | 0.391440503  | 0.346262073  | 0.545325851  |
| -0.338195908 | -0.522003584 | -0.523581598 | -0.391745577 | -0.56182708  | -0.342044682 |
| 0.142090986  | 0.49419232   | 0.510614169  | 0.282320087  | 0.51049773   | 0.155908514  |

|              |              |              |              |              |              |
|--------------|--------------|--------------|--------------|--------------|--------------|
| -0.08969154  | -0.506228719 | -0.479164096 | -0.084206215 | -0.676856601 | -0.172598981 |
| 0.246111939  | 0.582817766  | 0.573174272  | 0.446196351  | 0.491832485  | 0.276179998  |
| -0.335477028 | -0.407410544 | -0.603597911 | -0.418477177 | -0.362824419 | -0.339681384 |
| 0.401696919  | 0.494645311  | 0.483521727  | 0.393991368  | 0.55646938   | 0.336734799  |
| -0.184165677 | -0.51443786  | -0.488017477 | -0.186998558 | -0.624661043 | -0.320513489 |
| -0.170251417 | -0.237104665 | -0.640359575 | -0.3393358   | -0.135929752 | -0.325815867 |
| -0.240411585 | -0.469990331 | -0.492809062 | -0.243277238 | -0.535984349 | -0.310040854 |
| 0.207905257  | 0.425233154  | 0.641252713  | 0.512325013  | 0.324141934  | 0.274314659  |
| 0.13578905   | 0.306592487  | 0.554929855  | 0.118824732  | 0.478289173  | 0.205877109  |
| -0.174581806 | -0.412222104 | -0.629304555 | -0.332428586 | -0.496415344 | -0.340311838 |
| -0.028299621 | -0.598091701 | -0.409243702 | -0.073998757 | -0.719617577 | -0.166337244 |
| 0.104586107  | 0.289940516  | 0.487114602  | 0.135527892  | 0.366958619  | 0.012526344  |
| 0.094514353  | 0.457075771  | 0.48362118   | 0.154628412  | 0.489686045  | 0.114637171  |
| 0.289891406  | 0.320707863  | 0.525860539  | 0.350522403  | 0.269852927  | 0.308320719  |
| -0.168708244 | -0.411086906 | -0.577334176 | -0.320506627 | -0.340377113 | -0.289583116 |
| 0.30629765   | 0.093254778  | 0.579142435  | 0.276055014  | 0.209982303  | 0.478535431  |
| 0.203138031  | 0.709005039  | 0.346262073  | 0.150937226  | 1            | 0.277033043  |
| 0.20584511   | 0.239460447  | 0.427354498  | 0.095875419  | 0.442815268  | 0.522553735  |
| -0.282834351 | -0.352519774 | -0.616763411 | -0.549914765 | -0.178851229 | -0.284537227 |
| 0.242823704  | 1            | 0.344636281  | 0.429466467  | 0.709005039  | 0.159940973  |
| 0.141188921  | 0.463323723  | 0.447059873  | 0.19544744   | 0.392540475  | 0.20952394   |
| -0.271933048 | -0.175757523 | -0.526154739 | -0.311082737 | -0.240103176 | -0.339073028 |
| 0.209347857  | 0.366412333  | 0.386072262  | 0.192636949  | 0.451970595  | 0.203345568  |
| 0.31863118   | 0.256200429  | 0.549277116  | 0.37417027   | 0.318409606  | 0.60115247   |
| 0.088486604  | 0.218335821  | 0.468185447  | 0.101585811  | 0.329747412  | 0.147611321  |
| -0.27120628  | -0.24754964  | -0.529886931 | -0.556842968 | -0.064516873 | -0.318291146 |
| 0.32489886   | 0.204719575  | 0.385526605  | 0.462438642  | 0.24340573   | 0.169213517  |
| 0.053687345  | -0.342893091 | -0.316401228 | 0.190849354  | -0.562133923 | -0.129813189 |
| 0.199119658  | 0.36879488   | 0.377015995  | 0.113714354  | 0.544559385  | 0.215063321  |
| 0.134704817  | 0.2791427    | 0.247131194  | -0.078801682 | 0.512751327  | 0.058538394  |
| 0.336371722  | 0.513601041  | 0.31724071   | 0.394506983  | 0.371447996  | 0.144807232  |
| 0.039864413  | 0.285543476  | 0.194337441  | -0.023292251 | 0.434021351  | -0.030604241 |
| 0.246479359  | -0.083190683 | 0.471456107  | 0.306391153  | -0.055632764 | 0.387664746  |
| 0.327535859  | 0.429466467  | 0.391440503  | 1            | 0.150937226  | 0.129554899  |
| 0.266962316  | 0.159940973  | 0.545325851  | 0.129554899  | 0.277033043  | 1            |
| 0.268852978  | 0.07314689   | 0.196047345  | 0.31267058   | 0.121949722  | 0.134696507  |
| 1            | 0.242823704  | 0.300652889  | 0.327535859  | 0.203138031  | 0.266962316  |

| CACNB4       | CACNB2       | CACNB1       | CACNA2D3     | CACNA1I      | CACNA1G      |
|--------------|--------------|--------------|--------------|--------------|--------------|
| 0.693394112  | 0.897937717  | 0.610803039  | 0.92027585   | -0.372060009 | 0.638740613  |
| 0.641361026  | 0.860317304  | 0.617545301  | 0.876074206  | -0.433332762 | 0.597524033  |
| 0.657185835  | 0.838011216  | 0.482172179  | 0.891841254  | -0.416566098 | 0.670299029  |
| 0.602836655  | 0.771100505  | 0.399465542  | 0.830592211  | -0.567696917 | 0.589229301  |
| 0.660395498  | 0.79446612   | 0.441570684  | 0.851240655  | -0.455351608 | 0.645428713  |
| 0.602871293  | 0.731738362  | 0.311904985  | 0.845823173  | -0.555296427 | 0.548198994  |
| 0.688655057  | 0.878524924  | 0.556862538  | 1            | -0.211461195 | 0.682260093  |
| -0.571484164 | -0.756242674 | -0.376321342 | -0.849712605 | 0.477196936  | -0.631372525 |
| 0.593244799  | 0.761978877  | 0.346273259  | 0.854476305  | -0.514478104 | 0.550584145  |
| 0.600940809  | 0.686722536  | 0.347180909  | 0.753817163  | -0.601339417 | 0.494217891  |
| -0.602824851 | -0.832420974 | -0.621525043 | -0.830440534 | 0.379580997  | -0.555880503 |
| -0.628583902 | -0.775434603 | -0.566368368 | -0.79488071  | 0.407780587  | -0.517580033 |
| 0.584663136  | 0.747569249  | 0.22930008   | 0.817010354  | -0.484090475 | 0.630028207  |
| 0.519623559  | 0.757505145  | 0.338082112  | 0.801469487  | -0.431027171 | 0.629257355  |
| -0.631100945 | -0.611028258 | -0.247490393 | -0.733021943 | 0.602790176  | -0.557740095 |
| 0.582989     | 1            | 0.665307124  | 0.878524924  | -0.223486129 | 0.614884921  |
| 0.576832726  | 0.686080489  | 0.265970091  | 0.756922644  | -0.548065974 | 0.529589705  |
| -0.531286259 | -0.758952285 | -0.561851701 | -0.763556244 | 0.306935956  | -0.516613485 |
| 0.514814779  | 0.809561875  | 0.561122221  | 0.850387109  | -0.208743139 | 0.671199125  |
| -0.621631196 | -0.669507263 | -0.251009804 | -0.770681556 | 0.476318741  | -0.552310699 |
| 0.486930837  | 0.669564088  | 0.290641668  | 0.686202055  | -0.5866199   | 0.462318513  |
| 0.644233758  | 0.836798216  | 0.62943631   | 0.8852259    | -0.148674256 | 0.614878842  |
| 0.662036407  | 0.747599465  | 0.585414865  | 0.780407359  | -0.329406226 | 0.602754976  |
| 0.617455296  | 0.813379341  | 0.539908638  | 0.838593748  | -0.200163864 | 0.634303688  |
| 0.573235476  | 0.755388804  | 0.507467601  | 0.860747139  | -0.21081325  | 0.653332157  |
| 0.588615118  | 0.677207892  | 0.472529482  | 0.717244329  | -0.457871723 | 0.484418934  |
| -0.590883015 | -0.650171935 | -0.510236741 | -0.763648959 | 0.261551963  | -0.452079348 |
| -0.555369322 | -0.63213766  | -0.250715164 | -0.690150395 | 0.521733773  | -0.563348165 |
| 0.561180024  | 0.573228948  | 0.308509666  | 0.68116253   | -0.605276935 | 0.315720691  |
| 0.825798164  | 0.728907508  | 0.52943205   | 0.832004552  | -0.141037977 | 0.678302018  |
| -0.605026066 | -0.687755346 | -0.398056145 | -0.729307045 | 0.329449888  | -0.625418649 |
| 0.608918884  | 0.807726689  | 0.554889671  | 0.840094484  | -0.144768214 | 0.715206156  |
| -0.484885331 | -0.715918612 | -0.586306107 | -0.669079061 | 0.445482673  | -0.340216826 |
| 0.625808852  | 0.844526202  | 0.727815695  | 0.851853235  | -0.046710285 | 0.570132481  |
| -0.629304555 | -0.705378968 | -0.529886931 | -0.748457428 | 0.247131194  | -0.577334176 |
| 0.531845492  | 0.64228773   | 0.388448503  | 0.704394654  | -0.38331265  | 0.548197398  |
| -0.491785686 | -0.602132534 | -0.19372792  | -0.662923014 | 0.602932091  | -0.511782002 |

|              |              |              |              |              |              |
|--------------|--------------|--------------|--------------|--------------|--------------|
| 0.432722976  | 0.517397557  | 0.067847001  | 0.634478961  | -0.668617502 | 0.378687913  |
| -0.604499292 | -0.771348413 | -0.51457968  | -0.732234043 | 0.232324875  | -0.575720763 |
| 0.601169306  | 0.708161131  | 0.584563454  | 0.722966244  | -0.210697487 | 0.587105358  |
| -0.480289392 | -0.578909309 | -0.502072621 | -0.641488944 | 0.430372802  | -0.242780595 |
| 0.372406162  | 0.531114695  | 0.051981034  | 0.624737649  | -0.525885176 | 0.402965642  |
| 0.494624671  | 0.718454698  | 0.562106018  | 0.697076868  | -0.223035554 | 0.558684612  |
| 0.357320426  | 0.648676568  | 0.293331341  | 0.56274154   | -0.484751508 | 0.311248912  |
| -0.738475719 | -0.692029844 | -0.595080599 | -0.761580777 | 0.06608007   | -0.574995769 |
| -0.449118355 | -0.45965372  | -0.118014626 | -0.544734019 | 0.665137676  | -0.446602649 |
| 1            | 0.582989     | 0.420531375  | 0.688655057  | -0.183345859 | 0.593379229  |
| 0.402767111  | 0.43273762   | -0.009735792 | 0.532279545  | -0.664935768 | 0.37590156   |
| -0.41086039  | -0.525796024 | -0.130904101 | -0.581956851 | 0.474537254  | -0.429852278 |
| -0.396026103 | -0.498655452 | -0.104811596 | -0.546052444 | 0.61621789   | -0.451025868 |
| -0.208030617 | -0.592946496 | -0.443569468 | -0.570035226 | 0.39677328   | -0.292118949 |
| 0.593379229  | 0.614884921  | 0.390913181  | 0.682260093  | -0.007048046 | 1            |
| -0.539711916 | -0.565378394 | -0.629075941 | -0.528912236 | 0.191565881  | -0.33730996  |
| -0.496415344 | -0.417439834 | -0.064516873 | -0.548256649 | 0.512751327  | -0.340377113 |
| -0.399134559 | -0.478058256 | -0.35983222  | -0.472679558 | 0.311897228  | -0.338317455 |
| 0.635356902  | 0.69298979   | 0.673008232  | 0.723366769  | 0.229558364  | 0.568946099  |
| -0.412222104 | -0.508694184 | -0.24754964  | -0.612612648 | 0.2791427    | -0.411086906 |
| -0.571082234 | -0.647252494 | -0.367621795 | -0.640642373 | 0.072168992  | -0.563000568 |
| 0.490495793  | 0.605471739  | 0.488280868  | 0.544224916  | -0.143020668 | 0.359679761  |
| -0.447883983 | -0.565088206 | -0.307517759 | -0.570786922 | 0.100339101  | -0.46925698  |
| -0.386268901 | -0.474039678 | -0.515101771 | -0.494008161 | 0.150502315  | -0.263095812 |
| -0.370555674 | -0.249196971 | 0.025238772  | -0.384309934 | 0.631692283  | -0.323142156 |
| 0.420531375  | 0.665307124  | 1            | 0.556862538  | 0.064946348  | 0.390913181  |
| -0.242555619 | -0.489892948 | -0.51057175  | -0.359960835 | 0.410824366  | -0.091140033 |
| 0.262666244  | 0.213108822  | -0.211657111 | 0.333970781  | -0.647070331 | 0.300696421  |
| -0.259793506 | -0.249389114 | -0.057692567 | -0.291750517 | 0.761729427  | -0.089112808 |
| -0.183345859 | -0.223486129 | 0.064946348  | -0.211461195 | 1            | -0.007048046 |
| -0.020939596 | -0.426821561 | -0.223995537 | -0.479426673 | 0.336626945  | -0.084799735 |
| -0.009550639 | -0.189070116 | 0.107626496  | -0.270529361 | 0.696195023  | -0.083452649 |
| -0.371715197 | -0.44168599  | -0.639810645 | -0.431374166 | 0.003745658  | -0.210480585 |
| -0.332428586 | -0.531536198 | -0.556842968 | -0.507081193 | -0.078801682 | -0.320506627 |
| -0.340311838 | -0.342487455 | -0.318291146 | -0.391658911 | 0.058538394  | -0.289583116 |
| -0.186225248 | -0.301079593 | -0.457074737 | -0.276548287 | 0.173837439  | 0.07417993   |
| -0.174581806 | -0.274281736 | -0.27120628  | -0.292207376 | 0.134704817  | -0.168708244 |



| BRAF         | BDNF         | ANGPT2       | AKT1         |
|--------------|--------------|--------------|--------------|
| 0.866750025  | 0.818332212  | -0.524953264 | -0.788245725 |
| 0.857048067  | 0.802681367  | -0.544529911 | -0.802816398 |
| 0.881169653  | 0.782022591  | -0.430878761 | -0.783871547 |
| 0.906727111  | 0.750344688  | -0.402181813 | -0.848265842 |
| 0.875178923  | 0.772266356  | -0.406513513 | -0.82273276  |
| 1            | 0.757727773  | -0.430187838 | -0.858127527 |
| 0.845823173  | 0.780407359  | -0.494008161 | -0.733021943 |
| -0.880128269 | -0.73094696  | 0.401478247  | 0.762699197  |
| 0.90544797   | 0.731967876  | -0.356319111 | -0.80770624  |
| 0.884040511  | 0.72040973   | -0.40654851  | -0.858277378 |
| -0.763736432 | -0.761597111 | 0.576522961  | 0.747658445  |
| -0.7695523   | -0.757128838 | 0.486889359  | 0.725604991  |
| 0.884025167  | 0.683472164  | -0.285959854 | -0.802801034 |
| 0.803893504  | 0.686941199  | -0.360218684 | -0.764159329 |
| -0.858127527 | -0.681097854 | 0.412960722  | 1            |
| 0.731738362  | 0.747599465  | -0.474039678 | -0.611028258 |
| 0.862907717  | 0.699587952  | -0.334830861 | -0.839873886 |
| -0.710108621 | -0.69477614  | 0.613725256  | 0.64105004   |
| 0.758157455  | 0.732793794  | -0.483495224 | -0.633579376 |
| -0.852948302 | -0.683639623 | 0.335276624  | 0.764667207  |
| 0.813365664  | 0.616336168  | -0.439653012 | -0.756107595 |
| 0.766257458  | 0.739799585  | -0.517644545 | -0.655821843 |
| 0.757727773  | 1            | -0.451552311 | -0.681097854 |
| 0.738144451  | 0.742307787  | -0.445602904 | -0.703363972 |
| 0.758747708  | 0.753402874  | -0.419791433 | -0.686438422 |
| 0.758507552  | 0.702682071  | -0.499560566 | -0.766517191 |
| -0.750400812 | -0.690765114 | 0.616523499  | 0.672857974  |
| -0.779649057 | -0.64374242  | 0.489994857  | 0.759445861  |
| 0.820602184  | 0.613458895  | -0.451091724 | -0.783023741 |
| 0.710853111  | 0.722037163  | -0.483161688 | -0.666633605 |
| -0.724306948 | -0.65875316  | 0.402463534  | 0.696310575  |
| 0.723329583  | 0.783613346  | -0.319270007 | -0.595183778 |
| -0.640092676 | -0.602543024 | 0.6315131    | 0.620857693  |
| 0.664997651  | 0.7202537    | -0.544093109 | -0.534816443 |
| -0.68009742  | -0.709446699 | 0.549277116  | 0.663661236  |
| 0.737253417  | 0.64790607   | -0.389750993 | -0.738843452 |
| -0.766270968 | -0.582451338 | 0.281689978  | 0.70474365   |

|              |              |              |              |
|--------------|--------------|--------------|--------------|
| 0.864043576  | 0.552880191  | -0.243826831 | -0.817884361 |
| -0.614139993 | -0.660514318 | 0.404616775  | 0.583226664  |
| 0.648459696  | 0.64828244   | -0.455474453 | -0.625570675 |
| -0.689822972 | -0.600744353 | 0.516797788  | 0.561930067  |
| 0.752607657  | 0.470374315  | -0.352214255 | -0.728592013 |
| 0.584475579  | 0.590816654  | -0.470965457 | -0.534108629 |
| 0.646452581  | 0.538843406  | -0.362677603 | -0.493148842 |
| -0.606096164 | -0.670095256 | 0.407808201  | 0.570498577  |
| -0.714103137 | -0.480284539 | 0.336452727  | 0.814270244  |
| 0.602871293  | 0.662036407  | -0.386268901 | -0.631100945 |
| 0.744920722  | 0.497762434  | -0.19818127  | -0.71044664  |
| -0.676155601 | -0.533303112 | 0.07264513   | 0.684363462  |
| -0.687649911 | -0.519042378 | 0.186794931  | 0.640747461  |
| -0.580283864 | -0.552147213 | 0.336375502  | 0.470221553  |
| 0.548198994  | 0.602754976  | -0.263095812 | -0.557740095 |
| -0.473672896 | -0.556595119 | 0.544157388  | 0.47179211   |
| -0.685763056 | -0.521490198 | 0.318409606  | 0.62654572   |
| -0.529577112 | -0.466143562 | 0.474849936  | 0.541718501  |
| 0.429042521  | 0.568126754  | -0.473315761 | -0.317717051 |
| -0.586626966 | -0.515639446 | 0.256200429  | 0.481869804  |
| -0.517498248 | -0.569903414 | 0.207558903  | 0.442910321  |
| 0.470610347  | 0.545600364  | -0.37750087  | -0.472789939 |
| -0.52038992  | -0.470449968 | 0.251759012  | 0.434801636  |
| -0.430187838 | -0.451552311 | 1            | 0.412960722  |
| -0.563487242 | -0.436117409 | 0.202919216  | 0.636612894  |
| 0.311904985  | 0.585414865  | -0.515101771 | -0.247490393 |
| -0.381486364 | -0.420377542 | 0.487776759  | 0.376527303  |
| 0.607070234  | 0.336206236  | -0.072595234 | -0.649715039 |
| -0.528698803 | -0.45367842  | 0.347369756  | 0.558093056  |
| -0.555296427 | -0.329406226 | 0.150502315  | 0.602790176  |
| -0.528057412 | -0.377713796 | 0.275780709  | 0.409218307  |
| -0.563793227 | -0.223883068 | 0.161483672  | 0.519172823  |
| -0.321607039 | -0.446372218 | 0.446165091  | 0.285120275  |
| -0.235224226 | -0.412800506 | 0.37417027   | 0.226295551  |
| -0.348191732 | -0.35241148  | 0.60115247   | 0.349016552  |
| -0.255749355 | -0.209217594 | 0.411369994  | 0.162409576  |
| -0.257497847 | -0.214767796 | 0.31863118   | 0.286112586  |

## Ras\_genes

| PCC         | Gene.symbt | VEGFB        | TBK1         | SHC1         | RGL2         |
|-------------|------------|--------------|--------------|--------------|--------------|
| 43.7401675  | PAK1       | -0.697228619 | 0.733621855  | -0.655889331 | -0.642159516 |
| 43.63625454 | PRKCB      | -0.689738457 | 0.829053022  | -0.723529489 | -0.652555718 |
| 43.19225555 | PAK5       | -0.7310636   | 0.807851631  | -0.707192304 | -0.651508918 |
| 43.01893124 | MAP2K1     | -0.612322566 | 0.82495208   | -0.685851928 | -0.554559896 |
| 42.50999552 | GNG2       | -0.558148283 | 0.752269608  | -0.733383624 | -0.588469488 |
| 42.03464092 | MAPK9      | -0.56368769  | 0.761361657  | -0.693410406 | -0.502877904 |
| 42.00568316 | PDGFRB     | 0.688908431  | -0.617628303 | 0.643933098  | 0.783811599  |
| 41.98901661 | CALM1      | -0.650732884 | 0.752665196  | -0.685454714 | -0.614422468 |
| 41.67154361 | FOXO4      | 0.680784551  | -0.678321967 | 0.597487016  | 0.618462058  |
| 41.32101479 | RASA1      | -0.60883811  | 0.869515322  | -0.730006839 | -0.578282198 |
| 40.92820454 | CALM3      | -0.703368162 | 0.705114538  | -0.611012722 | -0.698315162 |
| 39.91801657 | PIK3CB     | -0.481597017 | 0.753955966  | -0.700280991 | -0.432062155 |
| 39.36546159 | CALM2      | -0.510036545 | 0.816307374  | -0.682415196 | -0.553426143 |
| 39.31523282 | KITLG      | -0.554415335 | 0.738820931  | -0.676272584 | -0.517996811 |
| 39.30155275 | AKT1       | 0.570498577  | -0.724857573 | 0.637951947  | 0.424277852  |
| 38.64006785 | MAPK10     | -0.407247249 | 0.682772931  | -0.661823528 | -0.418294577 |
| 38.22900821 | BDNF       | -0.670095256 | 0.684435804  | -0.586016449 | -0.647156951 |
| 38.17131273 | PDGFD      | -0.59154751  | 0.610558839  | -0.636373532 | -0.56502146  |
| 38.10149492 | PRKACB     | -0.531407256 | 0.639364433  | -0.676342392 | -0.50983234  |
| 37.96269388 | MAPK8      | -0.777053467 | 0.704708587  | -0.626062284 | -0.633111847 |
| 37.43002525 | RASGRP1    | -0.676077715 | 0.768706215  | -0.622313654 | -0.62842356  |
| 37.25166418 | NFKB1      | 0.473123086  | -0.476046382 | 0.572170813  | 0.582961862  |
| 36.53212731 | GNB5       | -0.674416688 | 0.636295873  | -0.56429191  | -0.45819668  |
| 36.20225132 | TBK1       | -0.56191422  | 1            | -0.64776259  | -0.428067042 |
| 36.09009473 | RASSF1     | 0.520185831  | -0.593771714 | 0.693009393  | 0.669724151  |
| 36.0112191  | GRIN2A     | -0.677448338 | 0.649128716  | -0.627213355 | -0.669339062 |
| 35.9626535  | CSF1R      | 0.641252713  | -0.594491304 | 0.530701967  | 0.585705437  |
| 35.96186803 | MAPK1      | -0.714212087 | 0.620500623  | -0.630588223 | -0.77473426  |
| 35.57705954 | PAK4       | 0.602706421  | -0.756345186 | 0.629545412  | 0.543379597  |
| 35.51664348 | IGF1       | -0.554759631 | 0.63722109   | -0.625327329 | -0.543394356 |
| 35.46888495 | SHC1       | 0.452304815  | -0.64776259  | 1            | 0.521992388  |
| 34.29937201 | RALGDS     | 0.343110618  | -0.547747258 | 0.669512718  | 0.38607044   |
| 34.23079018 | KIT        | -0.666625572 | 0.557069566  | -0.560393351 | -0.603676852 |
| 33.97070865 | GAB2       | 0.568225588  | -0.624581669 | 0.531648002  | 0.484388422  |
| 33.60277719 | PLCG1      | 0.610031406  | -0.397644395 | 0.41229509   | 0.784397856  |
| 33.24926558 | KRAS       | -0.328894392 | 0.513961123  | -0.610364144 | -0.574975322 |
| 33.2215488  | RAPGEF5    | -0.544982999 | 0.782697411  | -0.633641066 | -0.380728826 |

|             |        |              |              |              |              |
|-------------|--------|--------------|--------------|--------------|--------------|
| 33.11463415 | RGL2   | 0.709905429  | -0.428067042 | 0.521992388  | 1            |
| 32.820862   | GNG7   | 0.591600826  | -0.622229911 | 0.562125902  | 0.559738237  |
| 32.62603582 | VEGFB  | 1            | -0.56191422  | 0.452304815  | 0.709905429  |
| 32.06277493 | ETS1   | 0.578212049  | -0.418777299 | 0.465581146  | 0.636791931  |
| 31.55903823 | FGFR3  | 0.408242805  | -0.60258196  | 0.417621794  | 0.332840543  |
| 31.32602138 | PLCE1  | 0.477909735  | -0.346134217 | 0.554741844  | 0.632156998  |
| 31.15215783 | RALB   | -0.193699058 | 0.625849452  | -0.594081793 | -0.212922427 |
| 29.310903   | PIK3CD | 0.313049852  | -0.524756003 | 0.442400904  | 0.4094257    |
| 29.15984411 | RAB5A  | -0.151676188 | 0.6331311    | -0.561727226 | -0.202018467 |
| 28.99844049 | GNG10  | -0.19787369  | 0.552644783  | -0.495657583 | -0.291832579 |
| 28.97771569 | EFNA1  | 0.247239466  | -0.388918495 | 0.628153907  | 0.260227297  |
| 28.49900479 | RALA   | 0.458219639  | -0.321032608 | 0.311860191  | 0.4759942    |
| 28.28281117 | KSR2   | 0.274582079  | -0.656858135 | 0.489381914  | 0.239732917  |
| 27.99702704 | PLA1A  | 0.469910769  | -0.356029999 | 0.58914724   | 0.53567761   |
| 27.54564222 | GNG3   | -0.534248177 | 0.406686695  | -0.465762359 | -0.656797992 |
| 27.37518292 | MET    | -0.447459861 | 0.308310881  | -0.441314271 | -0.507945022 |
| 27.0075728  | FGF9   | -0.723282185 | 0.404969571  | -0.383651794 | -0.671814079 |
| 26.84753826 | CALML4 | 0.388143459  | -0.357764714 | 0.391362073  | 0.61124131   |
| 26.71974862 | FGF1   | 0.558356209  | -0.501442748 | 0.395349599  | 0.52110981   |
| 26.65913148 | RAF1   | 0.249246938  | -0.122872197 | 0.387716191  | 0.546051005  |
| 26.39576544 | MAPK3  | 0.319212803  | -0.479997022 | 0.369504117  | 0.199768119  |
| 25.68517767 | ANGPT2 | 0.407808201  | -0.290395627 | 0.503951171  | 0.473744004  |
| 24.71701564 | ELK1   | 0.12252351   | -0.401797022 | 0.40824564   | 0.252675321  |
| 22.806073   | PLCG2  | 0.439603673  | -0.177692812 | 0.343093358  | 0.546842569  |
| 22.03412867 | FGF2   | 0.475037527  | -0.219288071 | 0.380686334  | 0.42061941   |

| RASSF1       | RASGRP1      | RASA1        | RAPGEF5      | RALGDS       | RALB         |
|--------------|--------------|--------------|--------------|--------------|--------------|
| -0.653566957 | 0.774124929  | 0.828046666  | 0.676700632  | -0.651077316 | 0.588405492  |
| -0.739242023 | 0.799101651  | 0.897049191  | 0.766012083  | -0.670629057 | 0.680808995  |
| -0.723636027 | 0.832968109  | 0.88484408   | 0.771363802  | -0.624258208 | 0.626237117  |
| -0.700558107 | 0.749388607  | 0.910376528  | 0.757984439  | -0.692414275 | 0.76336469   |
| -0.721428548 | 0.692524326  | 0.88687596   | 0.698102839  | -0.692984262 | 0.772217812  |
| -0.669947589 | 0.651027697  | 0.855575279  | 0.732305379  | -0.692922767 | 0.820380841  |
| 0.77318732   | -0.748906147 | -0.747662089 | -0.599541125 | 0.604572014  | -0.488579821 |
| -0.660596132 | 0.730802535  | 0.828687107  | 0.687469945  | -0.629796522 | 0.647454551  |
| 0.665176894  | -0.733530967 | -0.796487373 | -0.579221739 | 0.712411309  | -0.60614302  |
| -0.722859951 | 0.773831605  | 1            | 0.754121411  | -0.671742585 | 0.716215509  |
| -0.692514997 | 0.751465099  | 0.779185158  | 0.652617564  | -0.52527258  | 0.493859299  |
| -0.631968906 | 0.610870345  | 0.844657841  | 0.720527072  | -0.684497373 | 0.857060347  |
| -0.721022627 | 0.698748439  | 0.877374789  | 0.713725767  | -0.603519254 | 0.743898756  |
| -0.621927516 | 0.708400679  | 0.848514225  | 0.671993886  | -0.711004063 | 0.67958737   |
| 0.592210448  | -0.686438422 | -0.80770624  | -0.702526732 | 0.709489477  | -0.70883458  |
| -0.65034083  | 0.588118119  | 0.782217466  | 0.619684693  | -0.71998089  | 0.818770534  |
| -0.597485591 | 0.753402874  | 0.731967876  | 0.611927998  | -0.562117544 | 0.462393816  |
| -0.560584035 | 0.615185112  | 0.723755199  | 0.540886632  | -0.628859902 | 0.543402894  |
| -0.605919706 | 0.576147957  | 0.79006557   | 0.636212628  | -0.582538479 | 0.715422706  |
| -0.582699562 | 0.791015328  | 0.729436637  | 0.590998944  | -0.524441105 | 0.362439194  |
| -0.628898621 | 1            | 0.773831605  | 0.670373666  | -0.553979901 | 0.383791384  |
| 0.642283915  | -0.579984083 | -0.635967566 | -0.401509171 | 0.675097669  | -0.497913403 |
| -0.470601522 | 0.572617853  | 0.689107801  | 0.566895561  | -0.618469269 | 0.575589362  |
| -0.593771714 | 0.768706215  | 0.869515322  | 0.782697411  | -0.547747258 | 0.625849452  |
| 1            | -0.628898621 | -0.722859951 | -0.555177222 | 0.656412693  | -0.562548046 |
| -0.627556333 | 0.834414156  | 0.706418456  | 0.543981038  | -0.581362029 | 0.308414353  |
| 0.598973372  | -0.672285372 | -0.640099069 | -0.617358111 | 0.478461242  | -0.388501427 |
| -0.586220402 | 0.756808462  | 0.665266851  | 0.496166373  | -0.444635354 | 0.244788112  |
| 0.618469777  | -0.734004931 | -0.809032862 | -0.603540374 | 0.568766755  | -0.552232432 |
| -0.555016869 | 0.722824674  | 0.684512891  | 0.503698377  | -0.623829095 | 0.475496835  |
| 0.693009393  | -0.622313654 | -0.730006839 | -0.633641066 | 0.669512718  | -0.594081793 |
| 0.656412693  | -0.553979901 | -0.671742585 | -0.471346606 | 1            | -0.721600602 |
| -0.483385269 | 0.656112776  | 0.606483492  | 0.438969954  | -0.433721229 | 0.302750575  |
| 0.608591131  | -0.558832305 | -0.697136356 | -0.456814422 | 0.603398939  | -0.543296364 |
| 0.601593301  | -0.552914129 | -0.586455873 | -0.361031719 | 0.431259085  | -0.35484647  |
| -0.683946085 | 0.495825727  | 0.636406226  | 0.412892331  | -0.627364073 | 0.607592924  |
| -0.555177222 | 0.670373666  | 0.754121411  | 1            | -0.471346606 | 0.593026778  |

|              |              |              |              |              |              |
|--------------|--------------|--------------|--------------|--------------|--------------|
| 0.669724151  | -0.62842356  | -0.578282198 | -0.380728826 | 0.38607044   | -0.212922427 |
| 0.548286005  | -0.691438061 | -0.688572495 | -0.536960853 | 0.519094566  | -0.421785976 |
| 0.520185831  | -0.676077715 | -0.60883811  | -0.544982999 | 0.343110618  | -0.193699058 |
| 0.561824066  | -0.608908536 | -0.522774494 | -0.495866767 | 0.436252652  | -0.231348131 |
| 0.48375836   | -0.52982231  | -0.670335614 | -0.678712572 | 0.552568615  | -0.654930282 |
| 0.606963653  | -0.49041654  | -0.425701033 | -0.408908342 | 0.512900968  | -0.275648902 |
| -0.562548046 | 0.383791384  | 0.716215509  | 0.593026778  | -0.721600602 | 1            |
| 0.609950018  | -0.423903871 | -0.651714887 | -0.518101408 | 0.509861982  | -0.616259619 |
| -0.559397005 | 0.384316894  | 0.725332513  | 0.557269777  | -0.605189023 | 0.884194831  |
| -0.555253839 | 0.325991422  | 0.684781792  | 0.479022335  | -0.568918422 | 0.847566029  |
| 0.50368632   | -0.376021495 | -0.478096766 | -0.298468871 | 0.673920918  | -0.560597213 |
| 0.444200181  | -0.4022223   | -0.474659344 | -0.285118093 | 0.491668824  | -0.360543129 |
| 0.548730029  | -0.465206595 | -0.736552294 | -0.620702367 | 0.540077251  | -0.704451524 |
| 0.524074382  | -0.5366008   | -0.434706557 | -0.322052965 | 0.433589     | -0.209854466 |
| -0.433003676 | 0.615705809  | 0.429904146  | 0.23138453   | -0.314043077 | 0.060867311  |
| -0.381182149 | 0.382033391  | 0.384130562  | 0.320300439  | -0.431015613 | 0.245902392  |
| -0.408788988 | 0.564270711  | 0.429070775  | 0.320118786  | -0.207572151 | -0.014942779 |
| 0.439653911  | -0.535641401 | -0.448815217 | -0.374891982 | 0.358919208  | -0.24591115  |
| 0.399931318  | -0.549982354 | -0.540994005 | -0.35099882  | 0.438637426  | -0.238635503 |
| 0.492073223  | -0.305999367 | -0.366000142 | -0.122303456 | 0.454494047  | -0.31614599  |
| 0.42136265   | -0.386372394 | -0.528875575 | -0.627143405 | 0.478946124  | -0.598473958 |
| 0.436515999  | -0.419791433 | -0.356319111 | -0.214568879 | 0.403741302  | -0.184577898 |
| 0.42925533   | -0.335093682 | -0.518323143 | -0.371998182 | 0.537892341  | -0.605514452 |
| 0.426094546  | -0.410896388 | -0.251743291 | -0.253238529 | 0.23697941   | -0.002615818 |
| 0.232869667  | -0.354201356 | -0.240824786 | -0.314660133 | 0.262414532  | -0.036971339 |

| RALA         | RAF1         | RAB5A        | PRKCB        | PRKACB       | PLCG2        |
|--------------|--------------|--------------|--------------|--------------|--------------|
| -0.610924337 | -0.573600699 | 0.499422914  | 0.912433154  | 0.760968746  | -0.501454668 |
| -0.597947595 | -0.442341262 | 0.625266     | 1            | 0.742066617  | -0.412561597 |
| -0.52994016  | -0.407024219 | 0.570422599  | 0.945543058  | 0.771610841  | -0.431846236 |
| -0.597678043 | -0.45740358  | 0.721666078  | 0.943185559  | 0.801373186  | -0.314453308 |
| -0.613640582 | -0.574566248 | 0.760292111  | 0.905618812  | 0.856578834  | -0.289627818 |
| -0.565640761 | -0.509499074 | 0.741595908  | 0.886592296  | 0.849228528  | -0.306556644 |
| 0.581154005  | 0.647218952  | -0.427106819 | -0.836595925 | -0.719580826 | 0.580143214  |
| -0.547945074 | -0.482677438 | 0.565203848  | 0.918176016  | 0.732463056  | -0.406014919 |
| 0.669228657  | 0.548582276  | -0.602079014 | -0.824224998 | -0.782891805 | 0.351219946  |
| -0.474659344 | -0.366000142 | 0.725332513  | 0.897049191  | 0.79006557   | -0.251743291 |
| -0.617463382 | -0.525730067 | 0.452796737  | 0.922507693  | 0.646740199  | -0.537531562 |
| -0.504984017 | -0.453905739 | 0.795615191  | 0.836931818  | 0.867496     | -0.210995231 |
| -0.472545103 | -0.395472818 | 0.767272153  | 0.887315567  | 0.752199295  | -0.25310218  |
| -0.510073566 | -0.371733371 | 0.641119657  | 0.812641854  | 0.741054491  | -0.272014026 |
| 0.470704722  | 0.376527303  | -0.648023694 | -0.783871547 | -0.783023741 | 0.242829285  |
| -0.468109469 | -0.482758782 | 0.721659661  | 0.838608054  | 0.7345614    | -0.340599481 |
| -0.441369933 | -0.420377542 | 0.405659569  | 0.782022591  | 0.613458895  | -0.422237692 |
| -0.488842264 | -0.459816724 | 0.458937761  | 0.735799243  | 0.716018949  | -0.344787793 |
| -0.501626354 | -0.531425787 | 0.726464044  | 0.742066617  | 1            | -0.268129586 |
| -0.420085147 | -0.343282858 | 0.293116011  | 0.795745929  | 0.602126368  | -0.537673033 |
| -0.4022223   | -0.305999367 | 0.384316894  | 0.799101651  | 0.576147957  | -0.410896388 |
| 0.651875056  | 0.765239677  | -0.432433356 | -0.720291591 | -0.66195976  | 0.507953374  |
| -0.481812472 | -0.331264017 | 0.450312516  | 0.733356234  | 0.675225966  | -0.360244145 |
| -0.321032608 | -0.122872197 | 0.6331311    | 0.829053022  | 0.639364433  | -0.177692812 |
| 0.444200181  | 0.492073223  | -0.559397005 | -0.739242023 | -0.605919706 | 0.426094546  |
| -0.452427616 | -0.348947116 | 0.2658506    | 0.72894981   | 0.514275414  | -0.465773728 |
| 0.433625282  | 0.385526605  | -0.314594996 | -0.724090342 | -0.55957313  | 0.706561068  |
| -0.368926827 | -0.403722825 | 0.17060265   | 0.742306262  | 0.50877803   | -0.574957402 |
| 0.336724023  | 0.260386719  | -0.585265517 | -0.730582644 | -0.726181477 | 0.152675525  |
| -0.414028092 | -0.366943766 | 0.419474703  | 0.684401376  | 0.61918547   | -0.244139706 |
| 0.311860191  | 0.387716191  | -0.561727226 | -0.723529489 | -0.676342392 | 0.343093358  |
| 0.491668824  | 0.454494047  | -0.605189023 | -0.670629057 | -0.582538479 | 0.23697941   |
| -0.440615616 | -0.376842267 | 0.237628891  | 0.692802027  | 0.560331543  | -0.409223253 |
| 0.479627946  | 0.289678858  | -0.475842474 | -0.735299932 | -0.554257805 | 0.301436764  |
| 0.641774404  | 0.727207696  | -0.36733514  | -0.642595179 | -0.634296108 | 0.386834657  |
| -0.426061597 | -0.575310897 | 0.569297709  | 0.679045504  | 0.54446556   | -0.39119624  |
| -0.285118093 | -0.122303456 | 0.557269777  | 0.766012083  | 0.636212628  | -0.253238529 |

|              |              |              |              |              |              |
|--------------|--------------|--------------|--------------|--------------|--------------|
| 0.4759942    | 0.546051005  | -0.202018467 | -0.652555718 | -0.50983234  | 0.546842569  |
| 0.377836773  | 0.302313408  | -0.439868641 | -0.590983987 | -0.671185124 | 0.191378815  |
| 0.458219639  | 0.249246938  | -0.151676188 | -0.689738457 | -0.531407256 | 0.439603673  |
| 0.450498514  | 0.491932811  | -0.143221903 | -0.647829332 | -0.48048181  | 0.573502435  |
| 0.504240008  | 0.293460283  | -0.554216909 | -0.718034286 | -0.562480362 | 0.174003463  |
| 0.496838041  | 0.629277646  | -0.194159632 | -0.607997532 | -0.451565257 | 0.619413058  |
| -0.360543129 | -0.31614599  | 0.884194831  | 0.680808995  | 0.715422706  | -0.002615818 |
| 0.485588976  | 0.40580499   | -0.718953018 | -0.616641579 | -0.661632863 | 0.171575991  |
| -0.390627363 | -0.330115458 | 1            | 0.625266     | 0.726464044  | 0.08766535   |
| -0.47793223  | -0.439813711 | 0.901425332  | 0.628643654  | 0.735857952  | 0.066967286  |
| 0.360442299  | 0.448945817  | -0.420067187 | -0.579396077 | -0.477299232 | 0.340932508  |
| 1            | 0.606405872  | -0.390627363 | -0.597947595 | -0.501626354 | 0.279604766  |
| 0.402747718  | 0.208205285  | -0.789131026 | -0.655655775 | -0.590466448 | -0.012355796 |
| 0.356051437  | 0.454039439  | -0.185248946 | -0.522005415 | -0.460077517 | 0.585166686  |
| -0.216076664 | -0.381506069 | -0.051591708 | 0.535142364  | 0.293911025  | -0.579744765 |
| -0.311489253 | -0.463950052 | 0.041441182  | 0.462161965  | 0.424459901  | -0.520059441 |
| -0.369960288 | -0.310968249 | -0.090518829 | 0.549061655  | 0.337081729  | -0.611616467 |
| 0.293862256  | 0.463327209  | -0.169246863 | -0.532770653 | -0.346007054 | 0.46541799   |
| 0.331884264  | 0.114500517  | -0.11258664  | -0.577907549 | -0.261760672 | 0.307797596  |
| 0.606405872  | 1            | -0.330115458 | -0.442341262 | -0.531425787 | 0.408863968  |
| 0.451588965  | 0.32045941   | -0.615841477 | -0.538319706 | -0.616811318 | 0.079884229  |
| 0.327831788  | 0.487776759  | -0.160013937 | -0.430878761 | -0.451091724 | 0.544579199  |
| 0.348545469  | 0.486365271  | -0.657169798 | -0.425646353 | -0.621373258 | 0.079264287  |
| 0.279604766  | 0.408863968  | 0.08766535   | -0.412561597 | -0.268129586 | 1            |
| 0.296031231  | 0.413181517  | 0.130121564  | -0.367740128 | -0.335080393 | 0.492704428  |



| PLCG1        | PLCE1        | PLA1A        | PIK3CD       | PIK3CB       | PDGFRB       |
|--------------|--------------|--------------|--------------|--------------|--------------|
| -0.701843262 | -0.664005516 | -0.572389007 | -0.505633378 | 0.812968922  | -0.886177268 |
| -0.642595179 | -0.607997532 | -0.522005415 | -0.616641579 | 0.836931818  | -0.836595925 |
| -0.638421829 | -0.575154203 | -0.5041312   | -0.597276749 | 0.842395151  | -0.835883458 |
| -0.653031565 | -0.536297668 | -0.466345712 | -0.656441368 | 0.907665108  | -0.816833531 |
| -0.689141422 | -0.553817829 | -0.461271804 | -0.658655438 | 0.925049281  | -0.820315943 |
| -0.631459721 | -0.547423068 | -0.444705369 | -0.636046803 | 0.954636302  | -0.779767601 |
| 0.773362414  | 0.726089239  | 0.604296756  | 0.515200182  | -0.715959222 | 1            |
| -0.646397629 | -0.569922828 | -0.507142769 | -0.557489017 | 0.833916908  | -0.818948558 |
| 0.688498811  | 0.539766984  | 0.50073351   | 0.628601649  | -0.766037618 | 0.806352345  |
| -0.586455873 | -0.425701033 | -0.434706557 | -0.651714887 | 0.844657841  | -0.747662089 |
| -0.686311367 | -0.682729518 | -0.543894337 | -0.548903425 | 0.70804254   | -0.833267668 |
| -0.568285186 | -0.446685918 | -0.376307854 | -0.633554942 | 1            | -0.715959222 |
| -0.587264134 | -0.457715414 | -0.399596815 | -0.72054177  | 0.82799205   | -0.711597227 |
| -0.526191531 | -0.411724468 | -0.409795885 | -0.58474619  | 0.811693066  | -0.723604666 |
| 0.510408197  | 0.433717153  | 0.402403387  | 0.603714866  | -0.85420046  | 0.747658445  |
| -0.518685359 | -0.529396005 | -0.438653094 | -0.629354601 | 0.85930795   | -0.697663702 |
| -0.604733252 | -0.590751666 | -0.495866254 | -0.461025135 | 0.650855403  | -0.761597111 |
| -0.59931364  | -0.490322249 | -0.447423171 | -0.515859209 | 0.738978435  | -0.738719451 |
| -0.634296108 | -0.451565257 | -0.460077517 | -0.661632863 | 0.867496     | -0.719580826 |
| -0.544720802 | -0.57134542  | -0.574048649 | -0.307458168 | 0.600845606  | -0.757561789 |
| -0.552914129 | -0.49041654  | -0.5366008   | -0.423903871 | 0.610870345  | -0.748906147 |
| 0.694065971  | 0.726827528  | 0.637161678  | 0.518356338  | -0.638947072 | 0.784478661  |
| -0.496182971 | -0.440621385 | -0.436649309 | -0.464373069 | 0.729756524  | -0.654867031 |
| -0.397644395 | -0.346134217 | -0.356029999 | -0.524756003 | 0.753955966  | -0.617628303 |
| 0.601593301  | 0.606963653  | 0.524074382  | 0.609950018  | -0.631968906 | 0.77318732   |
| -0.538725043 | -0.516101003 | -0.570683874 | -0.314871653 | 0.531007     | -0.750251382 |
| 0.550073433  | 0.605913762  | 0.534058982  | 0.50147791   | -0.588992735 | 0.757846038  |
| -0.589583123 | -0.597796825 | -0.611048023 | -0.248477641 | 0.506711645  | -0.774504894 |
| 0.504615135  | 0.30062654   | 0.403439149  | 0.559830777  | -0.675195647 | 0.672694002  |
| -0.515321535 | -0.417748972 | -0.506717201 | -0.404013444 | 0.635314778  | -0.676277585 |
| 0.41229509   | 0.554741844  | 0.58914724   | 0.442400904  | -0.700280991 | 0.643933098  |
| 0.431259085  | 0.512900968  | 0.433589     | 0.509861982  | -0.684497373 | 0.604572014  |
| -0.549316811 | -0.477982364 | -0.48602798  | -0.319878431 | 0.552840375  | -0.72482854  |
| 0.417370129  | 0.412151521  | 0.37432692   | 0.398356056  | -0.636730721 | 0.587522052  |
| 1            | 0.536691651  | 0.439745511  | 0.51027444   | -0.568285186 | 0.773362414  |
| -0.546881527 | -0.601767525 | -0.438817572 | -0.498997513 | 0.64261335   | -0.665623174 |
| -0.361031719 | -0.408908342 | -0.322052965 | -0.518101408 | 0.720527072  | -0.599541125 |

|              |              |              |              |              |              |
|--------------|--------------|--------------|--------------|--------------|--------------|
| 0.784397856  | 0.632156998  | 0.53567761   | 0.4094257    | -0.432062155 | 0.783811599  |
| 0.523887075  | 0.314510082  | 0.403308874  | 0.382458176  | -0.60579246  | 0.675587452  |
| 0.610031406  | 0.477909735  | 0.469910769  | 0.313049852  | -0.481597017 | 0.688908431  |
| 0.570717556  | 0.685250299  | 0.563728447  | 0.361358077  | -0.47556737  | 0.755269481  |
| 0.450494729  | 0.400477483  | 0.192613313  | 0.460931642  | -0.747843512 | 0.628309413  |
| 0.536691651  | 1            | 0.606586765  | 0.315962152  | -0.446685918 | 0.726089239  |
| -0.35484647  | -0.275648902 | -0.209854466 | -0.616259619 | 0.857060347  | -0.488579821 |
| 0.51027444   | 0.315962152  | 0.245867716  | 1            | -0.633554942 | 0.515200182  |
| -0.36733514  | -0.194159632 | -0.185248946 | -0.718953018 | 0.795615191  | -0.427106819 |
| -0.514722238 | -0.224999564 | -0.173293772 | -0.677292716 | 0.799729966  | -0.479075796 |
| 0.300802567  | 0.544844763  | 0.452558409  | 0.274558708  | -0.604048813 | 0.505093266  |
| 0.641774404  | 0.496838041  | 0.356051437  | 0.485588976  | -0.504984017 | 0.581154005  |
| 0.381783249  | 0.177083728  | 0.123113548  | 0.729781718  | -0.683485101 | 0.442086631  |
| 0.439745511  | 0.606586765  | 1            | 0.245867716  | -0.376307854 | 0.604296756  |
| -0.425117139 | -0.557300175 | -0.556457917 | 0.002392148  | 0.274578251  | -0.659603266 |
| -0.457635729 | -0.531375896 | -0.466559264 | -0.084334866 | 0.452118076  | -0.606753502 |
| -0.493115266 | -0.500653571 | -0.530394208 | -0.131161364 | 0.263164392  | -0.585704974 |
| 0.539900204  | 0.574147266  | 0.418398901  | 0.238133517  | -0.41112986  | 0.607558396  |
| 0.317500986  | 0.376989349  | 0.30063812   | 0.15074782   | -0.365112073 | 0.481001345  |
| 0.727207696  | 0.629277646  | 0.454039439  | 0.40580499   | -0.453905739 | 0.647218952  |
| 0.412650096  | 0.30873168   | 0.142647484  | 0.674961042  | -0.653374843 | 0.441166356  |
| 0.393657101  | 0.564424312  | 0.594349275  | 0.344366936  | -0.337368426 | 0.576522961  |
| 0.43278634   | 0.327583406  | 0.234402209  | 0.651277775  | -0.564489834 | 0.436935246  |
| 0.386834657  | 0.619413058  | 0.585166686  | 0.171575991  | -0.210995231 | 0.580143214  |
| 0.438577008  | 0.623273272  | 0.430193822  | -0.006284802 | -0.319319822 | 0.516735454  |

| PDGFD        | PAK5         | PAK4         | PAK1         | NFKB1        | MET          |
|--------------|--------------|--------------|--------------|--------------|--------------|
| 0.777199535  | 0.901346791  | -0.67864019  | 1            | -0.810787632 | 0.59971707   |
| 0.735799243  | 0.945543058  | -0.730582644 | 0.912433154  | -0.720291591 | 0.462161965  |
| 0.759065557  | 1            | -0.742555817 | 0.901346791  | -0.680002941 | 0.493077368  |
| 0.748148812  | 0.912384176  | -0.710247185 | 0.908625801  | -0.714174104 | 0.417558221  |
| 0.764555682  | 0.890852249  | -0.702866509 | 0.880766512  | -0.734458017 | 0.45093873   |
| 0.733287652  | 0.873355212  | -0.668545956 | 0.877711058  | -0.711727794 | 0.486374325  |
| -0.738719451 | -0.835883458 | 0.672694002  | -0.886177268 | 0.784478661  | -0.606753502 |
| 0.773513948  | 0.889708216  | -0.670122207 | 0.905379134  | -0.721419266 | 0.480670189  |
| -0.788293061 | -0.834018418 | 0.76265632   | -0.866757548 | 0.744330661  | -0.484358194 |
| 0.723755199  | 0.88484408   | -0.809032862 | 0.828046666  | -0.635967566 | 0.384130562  |
| 0.664056509  | 0.880245865  | -0.593168285 | 0.89070214   | -0.75139852  | 0.466199973  |
| 0.738978435  | 0.842395151  | -0.675195647 | 0.812968922  | -0.638947072 | 0.452118076  |
| 0.644190371  | 0.838266297  | -0.726668477 | 0.770225601  | -0.624500976 | 0.287825004  |
| 0.776199434  | 0.822625856  | -0.776897105 | 0.758829917  | -0.593259506 | 0.545288347  |
| -0.766517191 | -0.822345798 | 0.755050802  | -0.802816398 | 0.620857693  | -0.472789939 |
| 0.651246008  | 0.78582346   | -0.566950729 | 0.808566233  | -0.720690936 | 0.380521762  |
| 0.702682071  | 0.776960336  | -0.662294047 | 0.802681367  | -0.602543024 | 0.545600364  |
| 1            | 0.759065557  | -0.67787149  | 0.777199535  | -0.649708749 | 0.58539749   |
| 0.716018949  | 0.771610841  | -0.726181477 | 0.760968746  | -0.66195976  | 0.424459901  |
| 0.673307032  | 0.806695156  | -0.686018773 | 0.841849726  | -0.632448814 | 0.528693939  |
| 0.615185112  | 0.832968109  | -0.734004931 | 0.774124929  | -0.579984083 | 0.382033391  |
| -0.649708749 | -0.680002941 | 0.495744884  | -0.810787632 | 1            | -0.545456408 |
| 0.722343783  | 0.744021576  | -0.655907099 | 0.788855834  | -0.607717637 | 0.554651948  |
| 0.610558839  | 0.807851631  | -0.756345186 | 0.733621855  | -0.476046382 | 0.308310881  |
| -0.560584035 | -0.723636027 | 0.618469777  | -0.653566957 | 0.642283915  | -0.381182149 |
| 0.63859806   | 0.752794338  | -0.719472731 | 0.723509764  | -0.582319276 | 0.606263644  |
| -0.618383861 | -0.744276739 | 0.545297611  | -0.75743694  | 0.621059976  | -0.526154739 |
| 0.680410942  | 0.749135487  | -0.647338399 | 0.787054702  | -0.623804392 | 0.592026739  |
| -0.67787149  | -0.742555817 | 1            | -0.67864019  | 0.495744884  | -0.34648649  |
| 0.759708493  | 0.715086997  | -0.734549872 | 0.688718663  | -0.558289584 | 0.565875168  |
| -0.636373532 | -0.707192304 | 0.629545412  | -0.655889331 | 0.572170813  | -0.441314271 |
| -0.628859902 | -0.624258208 | 0.568766755  | -0.651077316 | 0.675097669  | -0.431015613 |
| 0.731464282  | 0.71246464   | -0.649836781 | 0.731200789  | -0.532601566 | 0.560055186  |
| -0.649300621 | -0.732408749 | 0.586896009  | -0.684245106 | 0.504757868  | -0.501984943 |
| -0.59931364  | -0.638421829 | 0.504615135  | -0.701843262 | 0.694065971  | -0.457635729 |
| 0.524639313  | 0.61503239   | -0.40451472  | 0.645630136  | -0.636744938 | 0.353846984  |
| 0.540886632  | 0.771363802  | -0.603540374 | 0.676700632  | -0.401509171 | 0.320300439  |

|              |              |              |              |              |              |
|--------------|--------------|--------------|--------------|--------------|--------------|
| -0.56502146  | -0.651508918 | 0.543379597  | -0.642159516 | 0.582961862  | -0.507945022 |
| -0.674403229 | -0.65032837  | 0.807773026  | -0.634444121 | 0.429014343  | -0.456102552 |
| -0.59154751  | -0.7310636   | 0.602706421  | -0.697228619 | 0.473123086  | -0.447459861 |
| -0.547403854 | -0.630813482 | 0.431847479  | -0.730342125 | 0.708502531  | -0.507926153 |
| -0.516275669 | -0.69119411  | 0.415993768  | -0.682070089 | 0.445263635  | -0.363524781 |
| -0.490322249 | -0.575154203 | 0.30062654   | -0.664005516 | 0.726827528  | -0.531375896 |
| 0.543402894  | 0.626237117  | -0.552232432 | 0.588405492  | -0.497913403 | 0.245902392  |
| -0.515859209 | -0.597276749 | 0.559830777  | -0.505633378 | 0.518356338  | -0.084334866 |
| 0.458937761  | 0.570422599  | -0.585265517 | 0.499422914  | -0.432433356 | 0.041441182  |
| 0.516090796  | 0.566924399  | -0.508564422 | 0.541101948  | -0.483616325 | 0.10807189   |
| -0.563659125 | -0.553394078 | 0.322005242  | -0.622671297 | 0.622594318  | -0.446416572 |
| -0.488842264 | -0.52994016  | 0.336724023  | -0.610924337 | 0.651875056  | -0.311489253 |
| -0.469837213 | -0.607284135 | 0.546476723  | -0.528843256 | 0.403740306  | 0.016786546  |
| -0.447423171 | -0.5041312   | 0.403439149  | -0.572389007 | 0.637161678  | -0.466559264 |
| 0.515639777  | 0.533088691  | -0.432696553 | 0.633915192  | -0.524346674 | 0.573237692  |
| 0.58539749   | 0.493077368  | -0.34648649  | 0.59971707   | -0.545456408 | 1            |
| 0.457040548  | 0.576582128  | -0.467704342 | 0.60738066   | -0.471561486 | 0.589732506  |
| -0.409895045 | -0.53488046  | 0.249242676  | -0.571055738 | 0.496256459  | -0.45598816  |
| -0.491147964 | -0.587913896 | 0.450182928  | -0.568286358 | 0.360535693  | -0.519453483 |
| -0.459816724 | -0.407024219 | 0.260386719  | -0.573600699 | 0.765239677  | -0.463950052 |
| -0.412574593 | -0.54232132  | 0.437514163  | -0.48975527  | 0.390133165  | -0.188732276 |
| -0.499560566 | -0.433251567 | 0.394405441  | -0.544529911 | 0.6315131    | -0.37750087  |
| -0.420364043 | -0.393825198 | 0.482062728  | -0.437120864 | 0.482441131  | -0.121573636 |
| -0.344787793 | -0.431846236 | 0.152675525  | -0.501454668 | 0.507953374  | -0.520059441 |
| -0.466336357 | -0.405329782 | 0.137750665  | -0.556752898 | 0.504691833  | -0.600388935 |

| MAPK9        | MAPK8        | MAPK3        | MAPK10       | MAPK1        | MAP2K1       |
|--------------|--------------|--------------|--------------|--------------|--------------|
| 0.877711058  | 0.841849726  | -0.48975527  | 0.808566233  | 0.787054702  | 0.908625801  |
| 0.886592296  | 0.795745929  | -0.538319706 | 0.838608054  | 0.742306262  | 0.943185559  |
| 0.873355212  | 0.806695156  | -0.54232132  | 0.78582346   | 0.749135487  | 0.912384176  |
| 0.940092956  | 0.72894455   | -0.609741011 | 0.876154772  | 0.63896411   | 1            |
| 0.929755455  | 0.681106312  | -0.569335334 | 0.841310175  | 0.641209834  | 0.94203639   |
| 1            | 0.669374071  | -0.671587257 | 0.887100248  | 0.558737524  | 0.940092956  |
| -0.779767601 | -0.757561789 | 0.441166356  | -0.697663702 | -0.774504894 | -0.816833531 |
| 0.865775984  | 0.788574328  | -0.476900181 | 0.833933295  | 0.741731192  | 0.905321467  |
| -0.80791976  | -0.744608879 | 0.554270871  | -0.725383552 | -0.680130742 | -0.830123122 |
| 0.855575279  | 0.729436637  | -0.528875575 | 0.782217466  | 0.665266851  | 0.910376528  |
| 0.792023851  | 0.79498516   | -0.472114585 | 0.768813058  | 0.756179535  | 0.854734904  |
| 0.954636302  | 0.600845606  | -0.653374843 | 0.85930795   | 0.506711645  | 0.907665108  |
| 0.844243146  | 0.628265416  | -0.590285256 | 0.844726246  | 0.573134597  | 0.890614336  |
| 0.79142886   | 0.651110677  | -0.546128579 | 0.695901707  | 0.592321323  | 0.812067163  |
| -0.858277378 | -0.655821843 | 0.636612894  | -0.756107595 | -0.534816443 | -0.848265842 |
| 0.887100248  | 0.602774749  | -0.581655983 | 1            | 0.511856214  | 0.876154772  |
| 0.72040973   | 0.739799585  | -0.436117409 | 0.616336168  | 0.7202537    | 0.750344688  |
| 0.733287652  | 0.673307032  | -0.412574593 | 0.651246008  | 0.680410942  | 0.748148812  |
| 0.849228528  | 0.602126368  | -0.616811318 | 0.7345614    | 0.50877803   | 0.801373186  |
| 0.669374071  | 1            | -0.279742184 | 0.602774749  | 0.850239276  | 0.72894455   |
| 0.651027697  | 0.791015328  | -0.386372394 | 0.588118119  | 0.756808462  | 0.749388607  |
| -0.711727794 | -0.632448814 | 0.390133165  | -0.720690936 | -0.623804392 | -0.714174104 |
| 0.772867363  | 0.704444247  | -0.47851706  | 0.660351755  | 0.608731098  | 0.74949387   |
| 0.761361657  | 0.704708587  | -0.479997022 | 0.682772931  | 0.620500623  | 0.82495208   |
| -0.669947589 | -0.582699562 | 0.42136265   | -0.65034083  | -0.586220402 | -0.700558107 |
| 0.574687073  | 0.770179018  | -0.274873402 | 0.4683897    | 0.764389237  | 0.642970312  |
| -0.68093095  | -0.710842293 | 0.468185447  | -0.614049622 | -0.650297286 | -0.697969235 |
| 0.558737524  | 0.850239276  | -0.068891384 | 0.511856214  | 1            | 0.63896411   |
| -0.668545956 | -0.686018773 | 0.437514163  | -0.566950729 | -0.647338399 | -0.710247185 |
| 0.640574638  | 0.652543205  | -0.373151321 | 0.526042146  | 0.651745193  | 0.658999058  |
| -0.693410406 | -0.626062284 | 0.369504117  | -0.661823528 | -0.630588223 | -0.685851928 |
| -0.692922767 | -0.524441105 | 0.478946124  | -0.71998089  | -0.444635354 | -0.692414275 |
| 0.5967923    | 0.742154405  | -0.270193108 | 0.475893975  | 0.723556383  | 0.632466916  |
| -0.653816413 | -0.648598079 | 0.305555368  | -0.643712347 | -0.623132176 | -0.666561807 |
| -0.631459721 | -0.544720802 | 0.412650096  | -0.518685359 | -0.589583123 | -0.653031565 |
| 0.684502908  | 0.499454212  | -0.355434552 | 0.773192974  | 0.503226879  | 0.697969161  |
| 0.732305379  | 0.590998944  | -0.627143405 | 0.619684693  | 0.496166373  | 0.757984439  |

|              |              |              |              |              |              |
|--------------|--------------|--------------|--------------|--------------|--------------|
| -0.502877904 | -0.633111847 | 0.199768119  | -0.418294577 | -0.77473426  | -0.554559896 |
| -0.599179152 | -0.619350723 | 0.384797909  | -0.438689009 | -0.605328723 | -0.616135164 |
| -0.56368769  | -0.777053467 | 0.319212803  | -0.407247249 | -0.714212087 | -0.612322566 |
| -0.547226527 | -0.598386052 | 0.306455184  | -0.556621262 | -0.669786898 | -0.582447599 |
| -0.761451352 | -0.451981658 | 0.572976177  | -0.666891022 | -0.324422633 | -0.778841453 |
| -0.547423068 | -0.57134542  | 0.30873168   | -0.529396005 | -0.597796825 | -0.536297668 |
| 0.820380841  | 0.362439194  | -0.598473958 | 0.818770534  | 0.244788112  | 0.76336469   |
| -0.636046803 | -0.307458168 | 0.674961042  | -0.629354601 | -0.248477641 | -0.656441368 |
| 0.741595908  | 0.293116011  | -0.615841477 | 0.721659661  | 0.17060265   | 0.721666078  |
| 0.75192654   | 0.275152906  | -0.554960421 | 0.694560386  | 0.226506382  | 0.727004871  |
| -0.627676362 | -0.490932776 | 0.226315043  | -0.67100305  | -0.473499812 | -0.570371891 |
| -0.565640761 | -0.420085147 | 0.451588965  | -0.468109469 | -0.368926827 | -0.597678043 |
| -0.673085836 | -0.363320912 | 0.640742337  | -0.671764123 | -0.197253861 | -0.731338865 |
| -0.444705369 | -0.574048649 | 0.142647484  | -0.438653094 | -0.611048023 | -0.466345712 |
| 0.34032463   | 0.727732034  | 0.157174022  | 0.342706433  | 0.833475189  | 0.41893035   |
| 0.486374325  | 0.528693939  | -0.188732276 | 0.380521762  | 0.592026739  | 0.417558221  |
| 0.359636561  | 0.710732033  | -0.07089842  | 0.260086515  | 0.77272764   | 0.399938205  |
| -0.479330472 | -0.48592967  | 0.246038875  | -0.46939492  | -0.527472967 | -0.504089019 |
| -0.416606274 | -0.603914182 | 0.094782576  | -0.396362589 | -0.645005569 | -0.494395552 |
| -0.509499074 | -0.343282858 | 0.32045941   | -0.482758782 | -0.403722825 | -0.45740358  |
| -0.671587257 | -0.279742184 | 1            | -0.581655983 | -0.068891384 | -0.609741011 |
| -0.40654851  | -0.517644545 | 0.202919216  | -0.439653012 | -0.544093109 | -0.402181813 |
| -0.584059458 | -0.216056544 | 0.651987407  | -0.553350641 | -0.127195195 | -0.523551134 |
| -0.306556644 | -0.537673033 | 0.079884229  | -0.340599481 | -0.574957402 | -0.314453308 |
| -0.399040101 | -0.519007181 | 0.139301106  | -0.252891099 | -0.510448372 | -0.360583536 |

| KSR2         | KRAS         | KITLG        | KIT          | IGF1         | GRIN2A       |
|--------------|--------------|--------------|--------------|--------------|--------------|
| -0.528843256 | 0.645630136  | 0.758829917  | 0.731200789  | 0.688718663  | 0.723509764  |
| -0.655655775 | 0.679045504  | 0.812641854  | 0.692802027  | 0.684401376  | 0.72894981   |
| -0.607284135 | 0.61503239   | 0.822625856  | 0.71246464   | 0.715086997  | 0.752794338  |
| -0.731338865 | 0.697969161  | 0.812067163  | 0.632466916  | 0.658999058  | 0.642970312  |
| -0.677583226 | 0.696805132  | 0.822392184  | 0.628246672  | 0.666361959  | 0.612030824  |
| -0.673085836 | 0.684502908  | 0.79142886   | 0.5967923    | 0.640574638  | 0.574687073  |
| 0.442086631  | -0.665623174 | -0.723604666 | -0.72482854  | -0.676277585 | -0.750251382 |
| -0.609342349 | 0.666836526  | 0.749742655  | 0.706659795  | 0.681700389  | 0.650057684  |
| 0.560968785  | -0.581984029 | -0.799278081 | -0.675699789 | -0.748919504 | -0.72055267  |
| -0.736552294 | 0.636406226  | 0.848514225  | 0.606483492  | 0.684512891  | 0.706418456  |
| -0.544308256 | 0.652711093  | 0.659484297  | 0.668519786  | 0.580216855  | 0.678303262  |
| -0.683485101 | 0.64261335   | 0.811693066  | 0.552840375  | 0.635314778  | 0.531007     |
| -0.778769555 | 0.718197073  | 0.757330933  | 0.535462092  | 0.606282416  | 0.565340355  |
| -0.59559326  | 0.542768248  | 1            | 0.655958278  | 0.794405844  | 0.756377371  |
| 0.615445815  | -0.493148842 | -0.839873886 | -0.625570675 | -0.738843452 | -0.64510823  |
| -0.671764123 | 0.773192974  | 0.695901707  | 0.475893975  | 0.526042146  | 0.4683897    |
| -0.437482792 | 0.538843406  | 0.699587952  | 0.64828244   | 0.64790607   | 0.693951069  |
| -0.469837213 | 0.524639313  | 0.776199434  | 0.731464282  | 0.759708493  | 0.63859806   |
| -0.590466448 | 0.54446556   | 0.741054491  | 0.560331543  | 0.61918547   | 0.514275414  |
| -0.363320912 | 0.499454212  | 0.651110677  | 0.742154405  | 0.652543205  | 0.770179018  |
| -0.465206595 | 0.495825727  | 0.708400679  | 0.656112776  | 0.722824674  | 0.834414156  |
| 0.403740306  | -0.636744938 | -0.593259506 | -0.532601566 | -0.558289584 | -0.582319276 |
| -0.423669982 | 0.424301621  | 0.712872398  | 0.660717044  | 0.640832091  | 0.570761945  |
| -0.656858135 | 0.513961123  | 0.738820931  | 0.557069566  | 0.63722109   | 0.649128716  |
| 0.548730029  | -0.683946085 | -0.621927516 | -0.483385269 | -0.555016869 | -0.627556333 |
| -0.334416848 | 0.440511582  | 0.756377371  | 0.70582632   | 0.805382445  | 1            |
| 0.406116959  | -0.492809062 | -0.601216613 | -0.603597911 | -0.523581598 | -0.644799217 |
| -0.197253861 | 0.503226879  | 0.592321323  | 0.723556383  | 0.651745193  | 0.764389237  |
| 0.546476723  | -0.40451472  | -0.776897105 | -0.649836781 | -0.734549872 | -0.719472731 |
| -0.400148247 | 0.434570871  | 0.794405844  | 0.765480236  | 1            | 0.805382445  |
| 0.489381914  | -0.610364144 | -0.676272584 | -0.560393351 | -0.625327329 | -0.627213355 |
| 0.540077251  | -0.627364073 | -0.711004063 | -0.433721229 | -0.623829095 | -0.581362029 |
| -0.287064912 | 0.409574775  | 0.655958278  | 1            | 0.765480236  | 0.70582632   |
| 0.398529215  | -0.543306145 | -0.7211674   | -0.551214266 | -0.589886366 | -0.612906044 |
| 0.381783249  | -0.546881527 | -0.526191531 | -0.549316811 | -0.515321535 | -0.538725043 |
| -0.535359959 | 1            | 0.542768248  | 0.409574775  | 0.434570871  | 0.440511582  |
| -0.620702367 | 0.412892331  | 0.671993886  | 0.438969954  | 0.503698377  | 0.543981038  |

|              |              |              |              |              |              |
|--------------|--------------|--------------|--------------|--------------|--------------|
| 0.239732917  | -0.574975322 | -0.517996811 | -0.603676852 | -0.543394356 | -0.669339062 |
| 0.392396049  | -0.399599012 | -0.710497604 | -0.592239759 | -0.732141826 | -0.701541179 |
| 0.274582079  | -0.328894392 | -0.554415335 | -0.666625572 | -0.554759631 | -0.677448338 |
| 0.223179076  | -0.487190712 | -0.475898808 | -0.505746821 | -0.456896296 | -0.596373109 |
| 0.588391453  | -0.543571524 | -0.648038868 | -0.42554866  | -0.448976665 | -0.472586607 |
| 0.177083728  | -0.601767525 | -0.411724468 | -0.477982364 | -0.417748972 | -0.516101003 |
| -0.704451524 | 0.607592924  | 0.67958737   | 0.302750575  | 0.475496835  | 0.308414353  |
| 0.729781718  | -0.498997513 | -0.58474619  | -0.319878431 | -0.404013444 | -0.314871653 |
| -0.789131026 | 0.569297709  | 0.641119657  | 0.237628891  | 0.419474703  | 0.2658506    |
| -0.722470675 | 0.562965009  | 0.602657723  | 0.256363279  | 0.396566162  | 0.221359232  |
| 0.296078637  | -0.537392082 | -0.502883431 | -0.445278801 | -0.470166204 | -0.382004488 |
| 0.402747718  | -0.426061597 | -0.510073566 | -0.440615616 | -0.414028092 | -0.452427616 |
| 1            | -0.535359959 | -0.59559326  | -0.287064912 | -0.400148247 | -0.334416848 |
| 0.123113548  | -0.438817572 | -0.409795885 | -0.48602798  | -0.506717201 | -0.570683874 |
| 0.018135237  | 0.42837311   | 0.385147235  | 0.600627133  | 0.532044312  | 0.682270758  |
| 0.016786546  | 0.353846984  | 0.545288347  | 0.560055186  | 0.565875168  | 0.606263644  |
| -0.00721499  | 0.227312572  | 0.365006237  | 0.618065095  | 0.457403622  | 0.692430869  |
| 0.195574732  | -0.601307962 | -0.398804178 | -0.440628429 | -0.421923657 | -0.476272506 |
| 0.189132837  | -0.417614713 | -0.575382153 | -0.534088125 | -0.535952083 | -0.62672611  |
| 0.208205285  | -0.575310897 | -0.371733371 | -0.376842267 | -0.366943766 | -0.348947116 |
| 0.640742337  | -0.355434552 | -0.546128579 | -0.270193108 | -0.373151321 | -0.274873402 |
| 0.129980109  | -0.362677603 | -0.334830861 | -0.455474453 | -0.389750993 | -0.397207317 |
| 0.551041193  | -0.49153468  | -0.473086744 | -0.238968907 | -0.363600342 | -0.205847514 |
| -0.012355796 | -0.39119624  | -0.272014026 | -0.409223253 | -0.244139706 | -0.465773728 |
| -0.041770781 | -0.251508554 | -0.227564926 | -0.493698658 | -0.33177086  | -0.378686912 |



| GNG7         | GNG3         | GNG2         | GNG10        | GNB5         | GAB2         |
|--------------|--------------|--------------|--------------|--------------|--------------|
| -0.634444121 | 0.633915192  | 0.880766512  | 0.541101948  | 0.788855834  | -0.684245106 |
| -0.590983987 | 0.535142364  | 0.905618812  | 0.628643654  | 0.733356234  | -0.735299932 |
| -0.65032837  | 0.533088691  | 0.890852249  | 0.566924399  | 0.744021576  | -0.732408749 |
| -0.616135164 | 0.41893035   | 0.94203639   | 0.727004871  | 0.74949387   | -0.666561807 |
| -0.619765455 | 0.398642843  | 1            | 0.788665251  | 0.696463914  | -0.67748447  |
| -0.599179152 | 0.34032463   | 0.929755455  | 0.75192654   | 0.772867363  | -0.653816413 |
| 0.675587452  | -0.659603266 | -0.820315943 | -0.479075796 | -0.654867031 | 0.587522052  |
| -0.569495301 | 0.54366253   | 0.874987838  | 0.594299413  | 0.724989558  | -0.649134458 |
| 0.756328809  | -0.491451276 | -0.832917592 | -0.599577274 | -0.773349301 | 0.766228402  |
| -0.688572495 | 0.429904146  | 0.88687596   | 0.684781792  | 0.689107801  | -0.697136356 |
| -0.457379363 | 0.600510848  | 0.807831257  | 0.489325971  | 0.65588209   | -0.63470621  |
| -0.60579246  | 0.274578251  | 0.925049281  | 0.799729966  | 0.729756524  | -0.636730721 |
| -0.55307538  | 0.340230175  | 0.854560151  | 0.728046471  | 0.595435049  | -0.613980271 |
| -0.710497604 | 0.385147235  | 0.822392184  | 0.602657723  | 0.712872398  | -0.7211674   |
| 0.715565062  | -0.340721469 | -0.820494142 | -0.594116137 | -0.78923263  | 0.618690592  |
| -0.438689009 | 0.342706433  | 0.841310175  | 0.694560386  | 0.660351755  | -0.643712347 |
| -0.624512667 | 0.585794441  | 0.717571691  | 0.422498276  | 0.678062386  | -0.621006599 |
| -0.674403229 | 0.515639777  | 0.764555682  | 0.516090796  | 0.722343783  | -0.649300621 |
| -0.671185124 | 0.293911025  | 0.856578834  | 0.735857952  | 0.675225966  | -0.554257805 |
| -0.619350723 | 0.727732034  | 0.681106312  | 0.275152906  | 0.704444247  | -0.648598079 |
| -0.691438061 | 0.615705809  | 0.692524326  | 0.325991422  | 0.572617853  | -0.558832305 |
| 0.429014343  | -0.524346674 | -0.734458017 | -0.483616325 | -0.607717637 | 0.504757868  |
| -0.559548893 | 0.410806708  | 0.696463914  | 0.489155087  | 1            | -0.649000823 |
| -0.622229911 | 0.406686695  | 0.752269608  | 0.552644783  | 0.636295873  | -0.624581669 |
| 0.548286005  | -0.433003676 | -0.721428548 | -0.555253839 | -0.470601522 | 0.608591131  |
| -0.701541179 | 0.682270758  | 0.612030824  | 0.221359232  | 0.570761945  | -0.612906044 |
| 0.516899806  | -0.520882888 | -0.616427944 | -0.265080373 | -0.668420199 | 0.510823417  |
| -0.605328723 | 0.833475189  | 0.641209834  | 0.226506382  | 0.608731098  | -0.623132176 |
| 0.807773026  | -0.432696553 | -0.702866509 | -0.508564422 | -0.655907099 | 0.586896009  |
| -0.732141826 | 0.532044312  | 0.666361959  | 0.396566162  | 0.640832091  | -0.589886366 |
| 0.562125902  | -0.465762359 | -0.733383624 | -0.495657583 | -0.56429191  | 0.531648002  |
| 0.519094566  | -0.314043077 | -0.692984262 | -0.568918422 | -0.618469269 | 0.603398939  |
| -0.592239759 | 0.600627133  | 0.628246672  | 0.256363279  | 0.660717044  | -0.551214266 |
| 0.571011417  | -0.474512906 | -0.67748447  | -0.457982629 | -0.649000823 | 1            |
| 0.523887075  | -0.425117139 | -0.689141422 | -0.514722238 | -0.496182971 | 0.417370129  |
| -0.399599012 | 0.42837311   | 0.696805132  | 0.562965009  | 0.424301621  | -0.543306145 |
| -0.536960853 | 0.23138453   | 0.698102839  | 0.479022335  | 0.566895561  | -0.456814422 |

|              |              |              |              |              |              |
|--------------|--------------|--------------|--------------|--------------|--------------|
| 0.559738237  | -0.656797992 | -0.588469488 | -0.291832579 | -0.45819668  | 0.484388422  |
| 1            | -0.47540305  | -0.619765455 | -0.393387378 | -0.559548893 | 0.571011417  |
| 0.591600826  | -0.534248177 | -0.558148283 | -0.19787369  | -0.674416688 | 0.568225588  |
| 0.433372997  | -0.563067476 | -0.565567739 | -0.196138695 | -0.465654646 | 0.419741433  |
| 0.440122059  | -0.200047501 | -0.71799696  | -0.569811049 | -0.542509772 | 0.52451617   |
| 0.314510082  | -0.557300175 | -0.553817829 | -0.224999564 | -0.440621385 | 0.412151521  |
| -0.421785976 | 0.060867311  | 0.772217812  | 0.847566029  | 0.575589362  | -0.543296364 |
| 0.382458176  | 0.002392148  | -0.658655438 | -0.677292716 | -0.464373069 | 0.398356056  |
| -0.439868641 | -0.051591708 | 0.760292111  | 0.901425332  | 0.450312516  | -0.475842474 |
| -0.393387378 | 0.006470032  | 0.788665251  | 1            | 0.489155087  | -0.457982629 |
| 0.249614534  | -0.416935192 | -0.613696377 | -0.433933319 | -0.561496079 | 0.597519026  |
| 0.377836773  | -0.216076664 | -0.613640582 | -0.47793223  | -0.481812472 | 0.479627946  |
| 0.392396049  | 0.018135237  | -0.677583226 | -0.722470675 | -0.423669982 | 0.398529215  |
| 0.403308874  | -0.556457917 | -0.461271804 | -0.173293772 | -0.436649309 | 0.37432692   |
| -0.47540305  | 1            | 0.398642843  | 0.006470032  | 0.410806708  | -0.474512906 |
| -0.456102552 | 0.573237692  | 0.45093873   | 0.10807189   | 0.554651948  | -0.501984943 |
| -0.428567783 | 0.728481907  | 0.361719229  | -0.040206457 | 0.544151222  | -0.510089031 |
| 0.315853438  | -0.534262687 | -0.471549549 | -0.220149845 | -0.339192584 | 0.312110141  |
| 0.482076424  | -0.547706074 | -0.439294443 | -0.103884361 | -0.543164397 | 0.76969196   |
| 0.302313408  | -0.381506069 | -0.574566248 | -0.439813711 | -0.331264017 | 0.289678858  |
| 0.384797909  | 0.157174022  | -0.569335334 | -0.554960421 | -0.47851706  | 0.305555368  |
| 0.348582204  | -0.496749022 | -0.416741926 | -0.148169268 | -0.467167375 | 0.290099448  |
| 0.400500922  | -0.009379468 | -0.520205987 | -0.598653609 | -0.406234283 | 0.205680495  |
| 0.191378815  | -0.579744765 | -0.289627818 | 0.066967286  | -0.360244145 | 0.301436764  |
| 0.244893609  | -0.498233437 | -0.35981869  | 0.022729539  | -0.410003799 | 0.139205453  |

| FOXO4        | FGFR3        | FGF9         | FGF2         | FGF1         | ETS1         |
|--------------|--------------|--------------|--------------|--------------|--------------|
| -0.866757548 | -0.682070089 | 0.60738066   | -0.556752898 | -0.568286358 | -0.730342125 |
| -0.824224998 | -0.718034286 | 0.549061655  | -0.367740128 | -0.577907549 | -0.647829332 |
| -0.834018418 | -0.69119411  | 0.576582128  | -0.405329782 | -0.587913896 | -0.630813482 |
| -0.830123122 | -0.778841453 | 0.399938205  | -0.360583536 | -0.494395552 | -0.582447599 |
| -0.832917592 | -0.71799696  | 0.361719229  | -0.35981869  | -0.439294443 | -0.565567739 |
| -0.80791976  | -0.761451352 | 0.359636561  | -0.399040101 | -0.416606274 | -0.547226527 |
| 0.806352345  | 0.628309413  | -0.585704974 | 0.516735454  | 0.481001345  | 0.755269481  |
| -0.798390458 | -0.632163152 | 0.501749982  | -0.412216889 | -0.498519287 | -0.617019507 |
| 1            | 0.577771257  | -0.530367999 | 0.316544798  | 0.566433189  | 0.573173512  |
| -0.796487373 | -0.670335614 | 0.429070775  | -0.240824786 | -0.540994005 | -0.522774494 |
| -0.759208666 | -0.609957441 | 0.647438637  | -0.449983294 | -0.516266141 | -0.688571164 |
| -0.766037618 | -0.747843512 | 0.263164392  | -0.319319822 | -0.365112073 | -0.47556737  |
| -0.730757846 | -0.62802477  | 0.317292599  | -0.154710871 | -0.419020238 | -0.48034021  |
| -0.799278081 | -0.648038868 | 0.365006237  | -0.227564926 | -0.575382153 | -0.475898808 |
| 0.830879396  | 0.684363462  | -0.317717051 | 0.285120275  | 0.442910321  | 0.501927053  |
| -0.725383552 | -0.666891022 | 0.260086515  | -0.252891099 | -0.396362589 | -0.556621262 |
| -0.75224171  | -0.533303112 | 0.568126754  | -0.446372218 | -0.569903414 | -0.562490766 |
| -0.788293061 | -0.516275669 | 0.457040548  | -0.466336357 | -0.491147964 | -0.547403854 |
| -0.782891805 | -0.562480362 | 0.337081729  | -0.335080393 | -0.261760672 | -0.48048181  |
| -0.744608879 | -0.451981658 | 0.710732033  | -0.519007181 | -0.603914182 | -0.598386052 |
| -0.733530967 | -0.52982231  | 0.564270711  | -0.354201356 | -0.549982354 | -0.608908536 |
| 0.744330661  | 0.445263635  | -0.471561486 | 0.504691833  | 0.360535693  | 0.708502531  |
| -0.773349301 | -0.542509772 | 0.544151222  | -0.410003799 | -0.543164397 | -0.465654646 |
| -0.678321967 | -0.60258196  | 0.404969571  | -0.219288071 | -0.501442748 | -0.418777299 |
| 0.665176894  | 0.48375836   | -0.408788988 | 0.232869667  | 0.399931318  | 0.561824066  |
| -0.72055267  | -0.472586607 | 0.692430869  | -0.378686912 | -0.62672611  | -0.596373109 |
| 0.681768587  | 0.487114602  | -0.616763411 | 0.471456107  | 0.447059873  | 0.602011011  |
| -0.680130742 | -0.324422633 | 0.77272764   | -0.510448372 | -0.645005569 | -0.669786898 |
| 0.76265632   | 0.415993768  | -0.467704342 | 0.137750665  | 0.450182928  | 0.431847479  |
| -0.748919504 | -0.448976665 | 0.457403622  | -0.33177086  | -0.535952083 | -0.456896296 |
| 0.597487016  | 0.417621794  | -0.383651794 | 0.380686334  | 0.395349599  | 0.465581146  |
| 0.712411309  | 0.552568615  | -0.207572151 | 0.262414532  | 0.438637426  | 0.436252652  |
| -0.675699789 | -0.42554866  | 0.618065095  | -0.493698658 | -0.534088125 | -0.505746821 |
| 0.766228402  | 0.52451617   | -0.510089031 | 0.139205453  | 0.76969196   | 0.419741433  |
| 0.688498811  | 0.450494729  | -0.493115266 | 0.438577008  | 0.317500986  | 0.570717556  |
| -0.581984029 | -0.543571524 | 0.227312572  | -0.251508554 | -0.417614713 | -0.487190712 |
| -0.579221739 | -0.678712572 | 0.320118786  | -0.314660133 | -0.35099882  | -0.495866767 |

|              |              |              |              |              |              |
|--------------|--------------|--------------|--------------|--------------|--------------|
| 0.618462058  | 0.332840543  | -0.671814079 | 0.42061941   | 0.52110981   | 0.636791931  |
| 0.756328809  | 0.440122059  | -0.428567783 | 0.244893609  | 0.482076424  | 0.433372997  |
| 0.680784551  | 0.408242805  | -0.723282185 | 0.475037527  | 0.558356209  | 0.578212049  |
| 0.573173512  | 0.435863004  | -0.518279978 | 0.560311663  | 0.413874096  | 1            |
| 0.577771257  | 1            | -0.181632724 | 0.295085271  | 0.433187933  | 0.435863004  |
| 0.539766984  | 0.400477483  | -0.500653571 | 0.623273272  | 0.376989349  | 0.685250299  |
| -0.60614302  | -0.654930282 | -0.014942779 | -0.036971339 | -0.238635503 | -0.231348131 |
| 0.628601649  | 0.460931642  | -0.131161364 | -0.006284802 | 0.15074782   | 0.361358077  |
| -0.602079014 | -0.554216909 | -0.090518829 | 0.130121564  | -0.11258664  | -0.143221903 |
| -0.599577274 | -0.569811049 | -0.040206457 | 0.022729539  | -0.103884361 | -0.196138695 |
| 0.547344553  | 0.409606704  | -0.250390777 | 0.411879978  | 0.367696175  | 0.426907473  |
| 0.669228657  | 0.504240008  | -0.369960288 | 0.296031231  | 0.331884264  | 0.450498514  |
| 0.560968785  | 0.588391453  | -0.00721499  | -0.041770781 | 0.189132837  | 0.223179076  |
| 0.50073351   | 0.192613313  | -0.530394208 | 0.430193822  | 0.30063812   | 0.563728447  |
| -0.491451276 | -0.200047501 | 0.728481907  | -0.498233437 | -0.547706074 | -0.563067476 |
| -0.484358194 | -0.363524781 | 0.589732506  | -0.600388935 | -0.519453483 | -0.507926153 |
| -0.530367999 | -0.181632724 | 1            | -0.490030418 | -0.551260752 | -0.518279978 |
| 0.448673855  | 0.409773178  | -0.390599036 | 0.411365927  | 0.430168431  | 0.501369382  |
| 0.566433189  | 0.433187933  | -0.551260752 | 0.242557869  | 1            | 0.413874096  |
| 0.548582276  | 0.293460283  | -0.310968249 | 0.413181517  | 0.114500517  | 0.491932811  |
| 0.554270871  | 0.572976177  | -0.07089842  | 0.139301106  | 0.094782576  | 0.306455184  |
| 0.516573156  | 0.07264513   | -0.473315761 | 0.446165091  | 0.207558903  | 0.580811253  |
| 0.535063474  | 0.357022596  | 0.026054047  | 0.081104323  | 0.02616654   | 0.237542796  |
| 0.351219946  | 0.174003463  | -0.611616467 | 0.492704428  | 0.307797596  | 0.573502435  |
| 0.316544798  | 0.295085271  | -0.490030418 | 1            | 0.242557869  | 0.560311663  |

| ELK1         | EFNA1        | CSF1R        | CALML4       | CALM3        | CALM2        |
|--------------|--------------|--------------|--------------|--------------|--------------|
| -0.437120864 | -0.622671297 | -0.75743694  | -0.571055738 | 0.89070214   | 0.770225601  |
| -0.425646353 | -0.579396077 | -0.724090342 | -0.532770653 | 0.922507693  | 0.887315567  |
| -0.393825198 | -0.553394078 | -0.744276739 | -0.53488046  | 0.880245865  | 0.838266297  |
| -0.523551134 | -0.570371891 | -0.697969235 | -0.504089019 | 0.854734904  | 0.890614336  |
| -0.520205987 | -0.613696377 | -0.616427944 | -0.471549549 | 0.807831257  | 0.854560151  |
| -0.584059458 | -0.627676362 | -0.68093095  | -0.479330472 | 0.792023851  | 0.844243146  |
| 0.436935246  | 0.505093266  | 0.757846038  | 0.607558396  | -0.833267668 | -0.711597227 |
| -0.410813512 | -0.592020598 | -0.706953859 | -0.538629    | 0.885858342  | 0.83966946   |
| 0.535063474  | 0.547344553  | 0.681768587  | 0.448673855  | -0.759208666 | -0.730757846 |
| -0.518323143 | -0.478096766 | -0.640099069 | -0.448815217 | 0.779185158  | 0.877374789  |
| -0.345795498 | -0.530241088 | -0.748316688 | -0.585422462 | 1            | 0.810747087  |
| -0.564489834 | -0.604048813 | -0.588992735 | -0.41112986  | 0.70804254   | 0.82799205   |
| -0.599900138 | -0.473491986 | -0.60227849  | -0.464847493 | 0.810747087  | 1            |
| -0.473086744 | -0.502883431 | -0.601216613 | -0.398804178 | 0.659484297  | 0.757330933  |
| 0.558093056  | 0.541718501  | 0.663661236  | 0.396358197  | -0.657989504 | -0.73905009  |
| -0.553350641 | -0.67100305  | -0.614049622 | -0.46939492  | 0.768813058  | 0.844726246  |
| -0.45367842  | -0.466143562 | -0.709446699 | -0.521098819 | 0.755529772  | 0.689268937  |
| -0.420364043 | -0.563659125 | -0.618383861 | -0.409895045 | 0.664056509  | 0.644190371  |
| -0.621373258 | -0.477299232 | -0.55957313  | -0.346007054 | 0.646740199  | 0.752199295  |
| -0.216056544 | -0.490932776 | -0.710842293 | -0.48592967  | 0.79498516   | 0.628265416  |
| -0.335093682 | -0.376021495 | -0.672285372 | -0.535641401 | 0.751465099  | 0.698748439  |
| 0.482441131  | 0.622594318  | 0.621059976  | 0.496256459  | -0.75139852  | -0.624500976 |
| -0.406234283 | -0.561496079 | -0.668420199 | -0.339192584 | 0.65588209   | 0.595435049  |
| -0.401797022 | -0.388918495 | -0.594491304 | -0.357764714 | 0.705114538  | 0.816307374  |
| 0.42925533   | 0.50368632   | 0.598973372  | 0.439653911  | -0.692514997 | -0.721022627 |
| -0.205847514 | -0.382004488 | -0.644799217 | -0.476272506 | 0.678303262  | 0.565340355  |
| 0.377015995  | 0.427354498  | 1            | 0.456470345  | -0.748316688 | -0.60227849  |
| -0.127195195 | -0.473499812 | -0.650297286 | -0.527472967 | 0.756179535  | 0.573134597  |
| 0.482062728  | 0.322005242  | 0.545297611  | 0.249242676  | -0.593168285 | -0.726668477 |
| -0.363600342 | -0.470166204 | -0.523581598 | -0.421923657 | 0.580216855  | 0.606282416  |
| 0.40824564   | 0.628153907  | 0.530701967  | 0.391362073  | -0.611012722 | -0.682415196 |
| 0.537892341  | 0.673920918  | 0.478461242  | 0.358919208  | -0.52527258  | -0.603519254 |
| -0.238968907 | -0.445278801 | -0.603597911 | -0.440628429 | 0.668519786  | 0.535462092  |
| 0.205680495  | 0.597519026  | 0.510823417  | 0.312110141  | -0.63470621  | -0.613980271 |
| 0.43278634   | 0.300802567  | 0.550073433  | 0.539900204  | -0.686311367 | -0.587264134 |
| -0.49153468  | -0.537392082 | -0.492809062 | -0.601307962 | 0.652711093  | 0.718197073  |
| -0.371998182 | -0.298468871 | -0.617358111 | -0.374891982 | 0.652617564  | 0.713725767  |

|              |              |              |              |              |              |
|--------------|--------------|--------------|--------------|--------------|--------------|
| 0.252675321  | 0.260227297  | 0.585705437  | 0.61124131   | -0.698315162 | -0.553426143 |
| 0.400500922  | 0.249614534  | 0.516899806  | 0.315853438  | -0.457379363 | -0.55307538  |
| 0.12252351   | 0.247239466  | 0.641252713  | 0.388143459  | -0.703368162 | -0.510036545 |
| 0.237542796  | 0.426907473  | 0.602011011  | 0.501369382  | -0.688571164 | -0.48034021  |
| 0.357022596  | 0.409606704  | 0.487114602  | 0.409773178  | -0.609957441 | -0.62802477  |
| 0.327583406  | 0.544844763  | 0.605913762  | 0.574147266  | -0.682729518 | -0.457715414 |
| -0.605514452 | -0.560597213 | -0.388501427 | -0.24591115  | 0.493859299  | 0.743898756  |
| 0.651277775  | 0.274558708  | 0.50147791   | 0.238133517  | -0.548903425 | -0.72054177  |
| -0.657169798 | -0.420067187 | -0.314594996 | -0.169246863 | 0.452796737  | 0.767272153  |
| -0.598653609 | -0.433933319 | -0.265080373 | -0.220149845 | 0.489325971  | 0.728046471  |
| 0.318999095  | 1            | 0.427354498  | 0.317212635  | -0.530241088 | -0.473491986 |
| 0.348545469  | 0.360442299  | 0.433625282  | 0.293862256  | -0.617463382 | -0.472545103 |
| 0.551041193  | 0.296078637  | 0.406116959  | 0.195574732  | -0.544308256 | -0.778769555 |
| 0.234402209  | 0.452558409  | 0.534058982  | 0.418398901  | -0.543894337 | -0.399596815 |
| -0.009379468 | -0.416935192 | -0.520882888 | -0.534262687 | 0.600510848  | 0.340230175  |
| -0.121573636 | -0.446416572 | -0.526154739 | -0.45598816  | 0.466199973  | 0.287825004  |
| 0.026054047  | -0.250390777 | -0.616763411 | -0.390599036 | 0.647438637  | 0.317292599  |
| 0.334916399  | 0.317212635  | 0.456470345  | 1            | -0.585422462 | -0.464847493 |
| 0.02616654   | 0.367696175  | 0.447059873  | 0.430168431  | -0.516266141 | -0.419020238 |
| 0.486365271  | 0.448945817  | 0.385526605  | 0.463327209  | -0.525730067 | -0.395472818 |
| 0.651987407  | 0.226315043  | 0.468185447  | 0.246038875  | -0.472114585 | -0.590285256 |
| 0.347369756  | 0.474849936  | 0.549277116  | 0.271184337  | -0.504433307 | -0.353316324 |
| 1            | 0.318999095  | 0.377015995  | 0.334916399  | -0.345795498 | -0.599900138 |
| 0.079264287  | 0.340932508  | 0.706561068  | 0.46541799   | -0.537531562 | -0.25310218  |
| 0.081104323  | 0.411879978  | 0.471456107  | 0.411365927  | -0.449983294 | -0.154710871 |

| CALM1        | BDNF         | ANGPT2       | AKT1         |
|--------------|--------------|--------------|--------------|
| 0.905379134  | 0.802681367  | -0.544529911 | -0.802816398 |
| 0.918176016  | 0.782022591  | -0.430878761 | -0.783871547 |
| 0.889708216  | 0.776960336  | -0.433251567 | -0.822345798 |
| 0.905321467  | 0.750344688  | -0.402181813 | -0.848265842 |
| 0.874987838  | 0.717571691  | -0.416741926 | -0.820494142 |
| 0.865775984  | 0.72040973   | -0.40654851  | -0.858277378 |
| -0.818948558 | -0.761597111 | 0.576522961  | 0.747658445  |
| 1            | 0.720276379  | -0.487657528 | -0.798740637 |
| -0.798390458 | -0.75224171  | 0.516573156  | 0.830879396  |
| 0.828687107  | 0.731967876  | -0.356319111 | -0.80770624  |
| 0.885858342  | 0.755529772  | -0.504433307 | -0.657989504 |
| 0.833916908  | 0.650855403  | -0.337368426 | -0.85420046  |
| 0.83966946   | 0.689268937  | -0.353316324 | -0.73905009  |
| 0.749742655  | 0.699587952  | -0.334830861 | -0.839873886 |
| -0.798740637 | -0.681097854 | 0.412960722  | 1            |
| 0.833933295  | 0.616336168  | -0.439653012 | -0.756107595 |
| 0.720276379  | 1            | -0.451552311 | -0.681097854 |
| 0.773513948  | 0.702682071  | -0.499560566 | -0.766517191 |
| 0.732463056  | 0.613458895  | -0.451091724 | -0.783023741 |
| 0.788574328  | 0.739799585  | -0.517644545 | -0.655821843 |
| 0.730802535  | 0.753402874  | -0.419791433 | -0.686438422 |
| -0.721419266 | -0.602543024 | 0.6315131    | 0.620857693  |
| 0.724989558  | 0.678062386  | -0.467167375 | -0.78923263  |
| 0.752665196  | 0.684435804  | -0.290395627 | -0.724857573 |
| -0.660596132 | -0.597485591 | 0.436515999  | 0.592210448  |
| 0.650057684  | 0.693951069  | -0.397207317 | -0.64510823  |
| -0.706953859 | -0.709446699 | 0.549277116  | 0.663661236  |
| 0.741731192  | 0.7202537    | -0.544093109 | -0.534816443 |
| -0.670122207 | -0.662294047 | 0.394405441  | 0.755050802  |
| 0.681700389  | 0.64790607   | -0.389750993 | -0.738843452 |
| -0.685454714 | -0.586016449 | 0.503951171  | 0.637951947  |
| -0.629796522 | -0.562117544 | 0.403741302  | 0.709489477  |
| 0.706659795  | 0.64828244   | -0.455474453 | -0.625570675 |
| -0.649134458 | -0.621006599 | 0.290099448  | 0.618690592  |
| -0.646397629 | -0.604733252 | 0.393657101  | 0.510408197  |
| 0.666836526  | 0.538843406  | -0.362677603 | -0.493148842 |
| 0.687469945  | 0.611927998  | -0.214568879 | -0.702526732 |

|              |              |              |              |
|--------------|--------------|--------------|--------------|
| -0.614422468 | -0.647156951 | 0.473744004  | 0.424277852  |
| -0.569495301 | -0.624512667 | 0.348582204  | 0.715565062  |
| -0.650732884 | -0.670095256 | 0.407808201  | 0.570498577  |
| -0.617019507 | -0.562490766 | 0.580811253  | 0.501927053  |
| -0.632163152 | -0.533303112 | 0.07264513   | 0.684363462  |
| -0.569922828 | -0.590751666 | 0.564424312  | 0.433717153  |
| 0.647454551  | 0.462393816  | -0.184577898 | -0.70883458  |
| -0.557489017 | -0.461025135 | 0.344366936  | 0.603714866  |
| 0.565203848  | 0.405659569  | -0.160013937 | -0.648023694 |
| 0.594299413  | 0.422498276  | -0.148169268 | -0.594116137 |
| -0.592020598 | -0.466143562 | 0.474849936  | 0.541718501  |
| -0.547945074 | -0.441369933 | 0.327831788  | 0.470704722  |
| -0.609342349 | -0.437482792 | 0.129980109  | 0.615445815  |
| -0.507142769 | -0.495866254 | 0.594349275  | 0.402403387  |
| 0.54366253   | 0.585794441  | -0.496749022 | -0.340721469 |
| 0.480670189  | 0.545600364  | -0.37750087  | -0.472789939 |
| 0.501749982  | 0.568126754  | -0.473315761 | -0.317717051 |
| -0.538629    | -0.521098819 | 0.271184337  | 0.396358197  |
| -0.498519287 | -0.569903414 | 0.207558903  | 0.442910321  |
| -0.482677438 | -0.420377542 | 0.487776759  | 0.376527303  |
| -0.476900181 | -0.436117409 | 0.202919216  | 0.636612894  |
| -0.487657528 | -0.451552311 | 1            | 0.412960722  |
| -0.410813512 | -0.45367842  | 0.347369756  | 0.558093056  |
| -0.406014919 | -0.422237692 | 0.544579199  | 0.242829285  |
| -0.412216889 | -0.446372218 | 0.446165091  | 0.285120275  |



## FoxO\_genes

| PCC         | Gene.symb | TGFB3        | STK11        | STAT3        | RAF1         |
|-------------|-----------|--------------|--------------|--------------|--------------|
| 25.74082826 | MAP2K1    | -0.723242824 | -0.727991659 | -0.334046417 | -0.45740358  |
| 25.4721925  | GABARAF   | -0.724387263 | -0.631408503 | -0.394877773 | -0.587783909 |
| 25.14773706 | BRAF      | -0.724306948 | -0.755938858 | -0.399936871 | -0.381486364 |
| 25.03119314 | MAPK9     | -0.712430861 | -0.666654656 | -0.333274598 | -0.509499074 |
| 24.56207475 | HOMER1    | -0.777378327 | -0.612232846 | -0.518136041 | -0.42209983  |
| 24.41332866 | FOXO4     | 0.860945344  | 0.697919598  | 0.346225913  | 0.548582276  |
| 23.98382273 | PIK3CB    | -0.691756704 | -0.681112387 | -0.294397866 | -0.453905739 |
| 23.60644451 | MAPK10    | -0.651069534 | -0.63876868  | -0.263623169 | -0.482758782 |
| 23.59720667 | AKT1      | 0.696310575  | 0.672065632  | 0.330647512  | 0.376527303  |
| 23.44892193 | BNIP3     | -0.64955689  | -0.772375423 | -0.295479498 | -0.436329187 |
| 23.26905688 | PDPK1     | -0.688518538 | -0.662093835 | -0.351630882 | -0.354945036 |
| 22.59513017 | PLK2      | -0.693312446 | -0.494391221 | -0.547946902 | -0.482949872 |
| 22.28375747 | HOMER3    | 0.592627257  | 0.818825519  | 0.195867292  | 0.406753199  |
| 21.70301462 | CCND1     | 0.610255582  | 0.604230613  | 0.296293703  | 0.305218618  |
| 21.68915949 | MAPK8     | -0.681128549 | -0.487726462 | -0.607567373 | -0.343282858 |
| 21.59817513 | TGFB3     | 1            | 0.571064894  | 0.336020279  | 0.39222197   |
| 21.50484023 | NLK       | -0.673496393 | -0.446695745 | -0.620516649 | -0.398807192 |
| 21.02255816 | MAPK13    | -0.632969789 | -0.47942327  | -0.50286086  | -0.264363153 |
| 20.97784832 | BCL6      | 0.56126748   | 0.500274321  | 0.571703147  | 0.653767518  |
| 20.69134682 | FOXO1     | 0.569078744  | 0.409690382  | 0.439349907  | 0.660864546  |
| 20.67168894 | GABARAF   | -0.546029716 | -0.781640446 | -0.028037219 | -0.389399819 |
| 20.64837286 | IGF1      | -0.688715863 | -0.54523765  | -0.481146811 | -0.366943766 |
| 20.42663468 | KLF2      | 0.46737385   | 0.450101617  | 0.359703648  | 0.562207794  |
| 20.15437503 | STK11     | 0.571064894  | 1            | 0.1733545    | 0.234945815  |
| 20.00069503 | KRAS      | -0.469320622 | -0.558806076 | -0.344693217 | -0.575310897 |
| 19.92320206 | MAPK1     | -0.65087028  | -0.393623525 | -0.723871782 | -0.403722825 |
| 19.58603814 | MAPK14    | 0.522220536  | 0.736845826  | -0.076013588 | 0.211619246  |
| 18.39535814 | PIK3CD    | 0.485204466  | 0.696696222  | 0.003631867  | 0.40580499   |
| 18.31489235 | CDK2      | 0.500559322  | 0.293621312  | 0.700967521  | 0.434424457  |
| 17.53017559 | CDKN1A    | 0.482594174  | 0.352441405  | 0.595399095  | 0.327911041  |
| 17.39908994 | FOXG1     | -0.55637582  | -0.526456969 | -0.201967881 | -0.206082891 |
| 17.16105966 | CCND2     | -0.590246278 | -0.518290169 | -0.121907153 | -0.360660619 |
| 16.52741915 | MAPK3     | 0.425317007  | 0.561428998  | -0.068931192 | 0.32045941   |
| 15.04774211 | RAF1      | 0.39222197   | 0.234945815  | 0.328698534  | 1            |
| 13.18872666 | STAT3     | 0.336020279  | 0.1733545    | 1            | 0.328698534  |

| PLK2         | PIK3CD       | PIK3CB       | PDPK1        | NLK          | MAPK9        |
|--------------|--------------|--------------|--------------|--------------|--------------|
| 0.770209142  | -0.656441368 | 0.907665108  | 0.847589673  | 0.682378961  | 0.940092956  |
| 0.807505305  | -0.649436402 | 0.839347079  | 0.787480429  | 0.697471484  | 0.90895793   |
| 0.73797596   | -0.586414829 | 0.882620817  | 0.795596061  | 0.738144451  | 0.884040511  |
| 0.694806314  | -0.636046803 | 0.954636302  | 0.772828143  | 0.623322479  | 1            |
| 0.792369652  | -0.514993562 | 0.803592635  | 0.801264395  | 0.848383391  | 0.81695767   |
| -0.769951511 | 0.628601649  | -0.766037618 | -0.683118176 | -0.749623933 | -0.80791976  |
| 0.619270891  | -0.633554942 | 1            | 0.765195166  | 0.565330777  | 0.954636302  |
| 0.612572687  | -0.629354601 | 0.85930795   | 0.779539516  | 0.539878712  | 0.887100248  |
| -0.660458455 | 0.603714866  | -0.85420046  | -0.686455258 | -0.703363972 | -0.858277378 |
| 0.618860915  | -0.703765014 | 0.75275238   | 0.77320125   | 0.606102592  | 0.776542567  |
| 0.675595564  | -0.635641905 | 0.765195166  | 1            | 0.623499027  | 0.772828143  |
| 1            | -0.408706398 | 0.619270891  | 0.675595564  | 0.831171098  | 0.694806314  |
| -0.616660611 | 0.764994298  | -0.692799629 | -0.790635086 | -0.526512684 | -0.722512718 |
| -0.563430877 | 0.59619396   | -0.739009528 | -0.745781337 | -0.598365448 | -0.757461642 |
| 0.82286693   | -0.307458168 | 0.600845606  | 0.664916251  | 0.79669062   | 0.669374071  |
| -0.693312446 | 0.485204466  | -0.691756704 | -0.688518538 | -0.673496393 | -0.712430861 |
| 0.831171098  | -0.323034862 | 0.565330777  | 0.623499027  | 1            | 0.623322479  |
| 0.823440073  | -0.334014698 | 0.618639547  | 0.71866448   | 0.74612476   | 0.679454064  |
| -0.691723346 | 0.472145743  | -0.639117268 | -0.50727373  | -0.603390725 | -0.68394852  |
| -0.7669047   | 0.452179965  | -0.602686734 | -0.561382532 | -0.672639625 | -0.703596524 |
| 0.418682262  | -0.771383424 | 0.834954264  | 0.700819127  | 0.310560318  | 0.807583358  |
| 0.69926643   | -0.404013444 | 0.635314778  | 0.612669003  | 0.771202111  | 0.640574638  |
| -0.626247927 | 0.499500622  | -0.629369198 | -0.624049952 | -0.598908427 | -0.703718035 |
| -0.494391221 | 0.696696222  | -0.681112387 | -0.662093835 | -0.446695745 | -0.666654656 |
| 0.544540635  | -0.498997513 | 0.64261335   | 0.671320464  | 0.494116136  | 0.684502908  |
| 0.799310698  | -0.248477641 | 0.506711645  | 0.648310271  | 0.795471049  | 0.558737524  |
| -0.505888526 | 0.740613637  | -0.666533313 | -0.699049586 | -0.375141191 | -0.677773735 |
| -0.408706398 | 1            | -0.633554942 | -0.635641905 | -0.323034862 | -0.636046803 |
| -0.676676813 | 0.293199802  | -0.48503287  | -0.477916443 | -0.664456284 | -0.54332114  |
| -0.552049372 | 0.277154185  | -0.506639151 | -0.471293996 | -0.575433438 | -0.55508377  |
| 0.442565617  | -0.442907433 | 0.592350468  | 0.633668569  | 0.544690777  | 0.582601212  |
| 0.478668817  | -0.416117818 | 0.613145712  | 0.62889289   | 0.451373945  | 0.605973777  |
| -0.348152203 | 0.674961042  | -0.653374843 | -0.428220307 | -0.308540973 | -0.671587257 |
| -0.482949872 | 0.40580499   | -0.453905739 | -0.354945036 | -0.398807192 | -0.509499074 |
| -0.547946902 | 0.003631867  | -0.294397866 | -0.351630882 | -0.620516649 | -0.333274598 |

| MAPK8        | MAPK3        | MAPK14       | MAPK13       | MAPK10       | MAPK1        |
|--------------|--------------|--------------|--------------|--------------|--------------|
| 0.72894455   | -0.609741011 | -0.75384384  | 0.75602701   | 0.876154772  | 0.63896411   |
| 0.764930439  | -0.595532653 | -0.704870937 | 0.733567758  | 0.85377652   | 0.700683557  |
| 0.766257458  | -0.563487242 | -0.687649911 | 0.723329583  | 0.813365664  | 0.664997651  |
| 0.669374071  | -0.671587257 | -0.677773735 | 0.679454064  | 0.887100248  | 0.558737524  |
| 0.760852228  | -0.456749949 | -0.54018808  | 0.765386943  | 0.725690714  | 0.744024007  |
| -0.744608879 | 0.554270871  | 0.638113205  | -0.657998537 | -0.725383552 | -0.680130742 |
| 0.600845606  | -0.653374843 | -0.666533313 | 0.618639547  | 0.85930795   | 0.506711645  |
| 0.602774749  | -0.581655983 | -0.689081801 | 0.602243715  | 1            | 0.511856214  |
| -0.655821843 | 0.636612894  | 0.640747461  | -0.595183778 | -0.756107595 | -0.534816443 |
| 0.606917394  | -0.604361563 | -0.681985278 | 0.602759979  | 0.762989585  | 0.557858709  |
| 0.664916251  | -0.428220307 | -0.699049586 | 0.71866448   | 0.779539516  | 0.648310271  |
| 0.82286693   | -0.348152203 | -0.505888526 | 0.823440073  | 0.612572687  | 0.799310698  |
| -0.53959994  | 0.563195491  | 0.783645466  | -0.585269995 | -0.728676408 | -0.46271032  |
| -0.621197426 | 0.559497218  | 0.630275088  | -0.582327896 | -0.724309214 | -0.513700448 |
| 1            | -0.279742184 | -0.441224381 | 0.787181591  | 0.602774749  | 0.850239276  |
| -0.681128549 | 0.425317007  | 0.522220536  | -0.632969789 | -0.651069534 | -0.65087028  |
| 0.79669062   | -0.308540973 | -0.375141191 | 0.74612476   | 0.539878712  | 0.795471049  |
| 0.787181591  | -0.316629696 | -0.539182451 | 1            | 0.602243715  | 0.7635539    |
| -0.618604861 | 0.439074938  | 0.420535617  | -0.506086244 | -0.640488839 | -0.598903533 |
| -0.616786026 | 0.447184438  | 0.478509549  | -0.657064808 | -0.606246691 | -0.596361479 |
| 0.377835372  | -0.678832806 | -0.784390702 | 0.407342897  | 0.82217277   | 0.241275225  |
| 0.652543205  | -0.373151321 | -0.429242706 | 0.560424626  | 0.526042146  | 0.651745193  |
| -0.601885291 | 0.459249093  | 0.505161653  | -0.595405864 | -0.669223036 | -0.581840618 |
| -0.487726462 | 0.561428998  | 0.736845826  | -0.47942327  | -0.63876868  | -0.393623525 |
| 0.499454212  | -0.355434552 | -0.553304481 | 0.526913856  | 0.773192974  | 0.503226879  |
| 0.850239276  | -0.068891384 | -0.30244961  | 0.7635539    | 0.511856214  | 1            |
| -0.441224381 | 0.645030821  | 1            | -0.539182451 | -0.689081801 | -0.30244961  |
| -0.307458168 | 0.674961042  | 0.740613637  | -0.334014698 | -0.629354601 | -0.248477641 |
| -0.685097847 | 0.273137589  | 0.262293083  | -0.574545319 | -0.521002414 | -0.696965757 |
| -0.592937713 | 0.342290627  | 0.309445225  | -0.47913059  | -0.522765045 | -0.54827442  |
| 0.435421326  | -0.387557678 | -0.465400424 | 0.432262649  | 0.574322074  | 0.327965599  |
| 0.476444415  | -0.275133921 | -0.487767184 | 0.472783777  | 0.65294816   | 0.452659744  |
| -0.279742184 | 1            | 0.645030821  | -0.316629696 | -0.581655983 | -0.068891384 |
| -0.343282858 | 0.32045941   | 0.211619246  | -0.264363153 | -0.482758782 | -0.403722825 |
| -0.607567373 | -0.068931192 | -0.076013588 | -0.50286086  | -0.263623169 | -0.723871782 |

| MAP2K1       | KRAS         | KLF2         | IGF1         | HOMER3       | HOMER1       |
|--------------|--------------|--------------|--------------|--------------|--------------|
| 1            | 0.697969161  | -0.72649002  | 0.658999058  | -0.787999138 | 0.837398532  |
| 0.927379744  | 0.705947367  | -0.760211059 | 0.646971365  | -0.737343523 | 0.794608221  |
| 0.906727111  | 0.646452581  | -0.646912455 | 0.737253417  | -0.753985921 | 0.853440938  |
| 0.940092956  | 0.684502908  | -0.703718035 | 0.640574638  | -0.722512718 | 0.81695767   |
| 0.837398532  | 0.601103366  | -0.648307251 | 0.795097873  | -0.66738914  | 1            |
| -0.830123122 | -0.581984029 | 0.640266498  | -0.748919504 | 0.726904414  | -0.819358633 |
| 0.907665108  | 0.64261335   | -0.629369198 | 0.635314778  | -0.692799629 | 0.803592635  |
| 0.876154772  | 0.773192974  | -0.669223036 | 0.526042146  | -0.728676408 | 0.725690714  |
| -0.848265842 | -0.493148842 | 0.598502597  | -0.738843452 | 0.671863975  | -0.821719025 |
| 0.808626333  | 0.641361002  | -0.64516291  | 0.61049498   | -0.828781352 | 0.767749973  |
| 0.847589673  | 0.671320464  | -0.624049952 | 0.612669003  | -0.790635086 | 0.801264395  |
| 0.770209142  | 0.544540635  | -0.626247927 | 0.69926643   | -0.616660611 | 0.792369652  |
| -0.787999138 | -0.686855637 | 0.588772455  | -0.531087991 | 1            | -0.66738914  |
| -0.774077403 | -0.580475293 | 0.638397695  | -0.516093826 | 0.698131057  | -0.714933144 |
| 0.72894455   | 0.499454212  | -0.601885291 | 0.652543205  | -0.53959994  | 0.760852228  |
| -0.723242824 | -0.469320622 | 0.46737385   | -0.688715863 | 0.592627257  | -0.777378327 |
| 0.682378961  | 0.494116136  | -0.598908427 | 0.771202111  | -0.526512684 | 0.848383391  |
| 0.75602701   | 0.526913856  | -0.595405864 | 0.560424626  | -0.585269995 | 0.765386943  |
| -0.665080377 | -0.55618145  | 0.543452696  | -0.580496429 | 0.596477246  | -0.613580438 |
| -0.724670258 | -0.611162222 | 0.692402089  | -0.517551403 | 0.555127871  | -0.670821734 |
| 0.797292284  | 0.645575711  | -0.512054341 | 0.444766685  | -0.795370339 | 0.582106518  |
| 0.658999058  | 0.434570871  | -0.499703631 | 1            | -0.531087991 | 0.795097873  |
| -0.72649002  | -0.651894842 | 1            | -0.499703631 | 0.588772455  | -0.648307251 |
| -0.727991659 | -0.558806076 | 0.450101617  | -0.54523765  | 0.818825519  | -0.612232846 |
| 0.697969161  | 1            | -0.651894842 | 0.434570871  | -0.686855637 | 0.601103366  |
| 0.63896411   | 0.503226879  | -0.581840618 | 0.651745193  | -0.46271032  | 0.744024007  |
| -0.75384384  | -0.553304481 | 0.505161653  | -0.429242706 | 0.783645466  | -0.54018808  |
| -0.656441368 | -0.498997513 | 0.499500622  | -0.404013444 | 0.764994298  | -0.514993562 |
| -0.547099433 | -0.383840121 | 0.524817321  | -0.538087562 | 0.390829993  | -0.623047635 |
| -0.54116884  | -0.378049867 | 0.411825186  | -0.553803664 | 0.418651814  | -0.566451707 |
| 0.609191676  | 0.460964577  | -0.360593884 | 0.522098254  | -0.570829033 | 0.666401603  |
| 0.641532951  | 0.547409316  | -0.402921124 | 0.535299203  | -0.48607066  | 0.618258753  |
| -0.609741011 | -0.355434552 | 0.459249093  | -0.373151321 | 0.563195491  | -0.456749949 |
| -0.45740358  | -0.575310897 | 0.562207794  | -0.366943766 | 0.406753199  | -0.42209983  |
| -0.334046417 | -0.344693217 | 0.359703648  | -0.481146811 | 0.195867292  | -0.518136041 |

| GABARAPL2    | GABARAPL1    | FOXO4        | FOXO1        | FOXG1        | CDKN1A       |
|--------------|--------------|--------------|--------------|--------------|--------------|
| 0.797292284  | 0.927379744  | -0.830123122 | -0.724670258 | 0.609191676  | -0.54116884  |
| 0.703614582  | 1            | -0.845508062 | -0.81351895  | 0.49049113   | -0.571271643 |
| 0.770972244  | 0.841104518  | -0.840045862 | -0.587084376 | 0.637384749  | -0.535767072 |
| 0.807583358  | 0.90895793   | -0.80791976  | -0.703596524 | 0.582601212  | -0.55508377  |
| 0.582106518  | 0.794608221  | -0.819358633 | -0.670821734 | 0.666401603  | -0.566451707 |
| -0.663918754 | -0.845508062 | 1            | 0.683780386  | -0.531663044 | 0.488791079  |
| 0.834954264  | 0.839347079  | -0.766037618 | -0.602686734 | 0.592350468  | -0.506639151 |
| 0.82217277   | 0.85377652   | -0.725383552 | -0.606246691 | 0.574322074  | -0.522765045 |
| -0.71143757  | -0.793144885 | 0.830879396  | 0.558987178  | -0.602786302 | 0.538199888  |
| 0.757749953  | 0.774245306  | -0.789182925 | -0.561357657 | 0.565674704  | -0.496330464 |
| 0.700819127  | 0.787480429  | -0.683118176 | -0.561382532 | 0.633668569  | -0.471293996 |
| 0.418682262  | 0.807505305  | -0.769951511 | -0.7669047   | 0.442565617  | -0.552049372 |
| -0.795370339 | -0.737343523 | 0.726904414  | 0.555127871  | -0.570829033 | 0.418651814  |
| -0.685669542 | -0.72790638  | 0.687093568  | 0.47994505   | -0.6130343   | 0.488021298  |
| 0.377835372  | 0.764930439  | -0.744608879 | -0.616786026 | 0.435421326  | -0.592937713 |
| -0.546029716 | -0.724387263 | 0.860945344  | 0.569078744  | -0.55637582  | 0.482594174  |
| 0.310560318  | 0.697471484  | -0.749623933 | -0.672639625 | 0.544690777  | -0.575433438 |
| 0.407342897  | 0.733567758  | -0.657998537 | -0.657064808 | 0.432262649  | -0.47913059  |
| -0.522833153 | -0.74218661  | 0.695401013  | 0.723618998  | -0.388199436 | 0.768919463  |
| -0.411133385 | -0.81351895  | 0.683780386  | 1            | -0.331359577 | 0.531473199  |
| 1            | 0.703614582  | -0.663918754 | -0.411133385 | 0.561482835  | -0.360001551 |
| 0.444766685  | 0.646971365  | -0.748919504 | -0.517551403 | 0.522098254  | -0.553803664 |
| -0.512054341 | -0.760211059 | 0.640266498  | 0.692402089  | -0.360593884 | 0.411825186  |
| -0.781640446 | -0.631408503 | 0.697919598  | 0.409690382  | -0.526456969 | 0.352441405  |
| 0.645575711  | 0.705947367  | -0.581984029 | -0.611162222 | 0.460964577  | -0.378049867 |
| 0.241275225  | 0.700683557  | -0.680130742 | -0.596361479 | 0.327965599  | -0.54827442  |
| -0.784390702 | -0.704870937 | 0.638113205  | 0.478509549  | -0.465400424 | 0.309445225  |
| -0.771383424 | -0.649436402 | 0.628601649  | 0.452179965  | -0.442907433 | 0.277154185  |
| -0.277096012 | -0.620655986 | 0.556662018  | 0.61775806   | -0.293032783 | 0.76730716   |
| -0.360001551 | -0.571271643 | 0.488791079  | 0.531473199  | -0.418373474 | 1            |
| 0.561482835  | 0.49049113   | -0.531663044 | -0.331359577 | 1            | -0.418373474 |
| 0.567673758  | 0.594065227  | -0.593414782 | -0.379067778 | 0.422931194  | -0.204924973 |
| -0.678832806 | -0.595532653 | 0.554270871  | 0.447184438  | -0.387557678 | 0.342290627  |
| -0.389399819 | -0.587783909 | 0.548582276  | 0.660864546  | -0.206082891 | 0.327911041  |
| -0.028037219 | -0.394877773 | 0.346225913  | 0.439349907  | -0.201967881 | 0.595399095  |

| CDK2         | CCND2        | CCND1        | BRAF         | BNIP3        | BCL6         |
|--------------|--------------|--------------|--------------|--------------|--------------|
| -0.547099433 | 0.641532951  | -0.774077403 | 0.906727111  | 0.808626333  | -0.665080377 |
| -0.620655986 | 0.594065227  | -0.72790638  | 0.841104518  | 0.774245306  | -0.74218661  |
| -0.553952411 | 0.643581246  | -0.7823536   | 1            | 0.798685285  | -0.648356568 |
| -0.54332114  | 0.605973777  | -0.757461642 | 0.884040511  | 0.776542567  | -0.68394852  |
| -0.623047635 | 0.618258753  | -0.714933144 | 0.853440938  | 0.767749973  | -0.613580438 |
| 0.556662018  | -0.593414782 | 0.687093568  | -0.840045862 | -0.789182925 | 0.695401013  |
| -0.48503287  | 0.613145712  | -0.739009528 | 0.882620817  | 0.75275238   | -0.639117268 |
| -0.521002414 | 0.65294816   | -0.724309214 | 0.813365664  | 0.762989585  | -0.640488839 |
| 0.575499393  | -0.534392431 | 0.742261487  | -0.858127527 | -0.783045441 | 0.634790014  |
| -0.500569432 | 0.530788362  | -0.775785387 | 0.798685285  | 1            | -0.611492238 |
| -0.477916443 | 0.62889289   | -0.745781337 | 0.795596061  | 0.77320125   | -0.50727373  |
| -0.676676813 | 0.478668817  | -0.563430877 | 0.73797596   | 0.618860915  | -0.691723346 |
| 0.390829993  | -0.48607066  | 0.698131057  | -0.753985921 | -0.828781352 | 0.596477246  |
| 0.505782598  | -0.347830621 | 1            | -0.7823536   | -0.775785387 | 0.497673779  |
| -0.685097847 | 0.476444415  | -0.621197426 | 0.766257458  | 0.606917394  | -0.618604861 |
| 0.500559322  | -0.590246278 | 0.610255582  | -0.724306948 | -0.64955689  | 0.56126748   |
| -0.664456284 | 0.451373945  | -0.598365448 | 0.738144451  | 0.606102592  | -0.603390725 |
| -0.574545319 | 0.472783777  | -0.582327896 | 0.723329583  | 0.602759979  | -0.506086244 |
| 0.764278069  | -0.31652451  | 0.497673779  | -0.648356568 | -0.611492238 | 1            |
| 0.61775806   | -0.379067778 | 0.47994505   | -0.587084376 | -0.561357657 | 0.723618998  |
| -0.277096012 | 0.567673758  | -0.685669542 | 0.770972244  | 0.757749953  | -0.522833153 |
| -0.538087562 | 0.535299203  | -0.516093826 | 0.737253417  | 0.61049498   | -0.580496429 |
| 0.524817321  | -0.402921124 | 0.638397695  | -0.646912455 | -0.64516291  | 0.543452696  |
| 0.293621312  | -0.518290169 | 0.604230613  | -0.755938858 | -0.772375423 | 0.500274321  |
| -0.383840121 | 0.547409316  | -0.580475293 | 0.646452581  | 0.641361002  | -0.55618145  |
| -0.696965757 | 0.452659744  | -0.513700448 | 0.664997651  | 0.557858709  | -0.598903533 |
| 0.262293083  | -0.487767184 | 0.630275088  | -0.687649911 | -0.681985278 | 0.420535617  |
| 0.293199802  | -0.416117818 | 0.59619396   | -0.586414829 | -0.703765014 | 0.472145743  |
| 1            | -0.191358393 | 0.505782598  | -0.553952411 | -0.500569432 | 0.764278069  |
| 0.76730716   | -0.204924973 | 0.488021298  | -0.535767072 | -0.496330464 | 0.768919463  |
| -0.293032783 | 0.422931194  | -0.6130343   | 0.637384749  | 0.565674704  | -0.388199436 |
| -0.191358393 | 1            | -0.347830621 | 0.643581246  | 0.530788362  | -0.31652451  |
| 0.273137589  | -0.275133921 | 0.559497218  | -0.563487242 | -0.604361563 | 0.439074938  |
| 0.434424457  | -0.360660619 | 0.305218618  | -0.381486364 | -0.436329187 | 0.653767518  |
| 0.700967521  | -0.121907153 | 0.296293703  | -0.399936871 | -0.295479498 | 0.571703147  |

AKT1

-0.848265842

-0.793144885

-0.858127527

-0.858277378

-0.821719025

0.830879396

-0.85420046

-0.756107595

1

-0.783045441

-0.686455258

-0.660458455

0.671863975

0.742261487

-0.655821843

0.696310575

-0.703363972

-0.595183778

0.634790014

0.558987178

-0.71143757

-0.738843452

0.598502597

0.672065632

-0.493148842

-0.534816443

0.640747461

0.603714866

0.575499393

0.538199888

-0.602786302

-0.534392431

0.636612894

0.376527303

0.330647512
